# Supplementary material
Source: publisher site journal article supplement (https://www.dovepress.com/article/428814)
Supplement: Supplementary file 1 [file get_supplementary_file.php]

---

|      |           |
|------|-----------|
| RS16 | MOL005321 |
| RS17 | MOL005308 |
| GC1  | MOL001484 |
| GC2  | MOL001792 |
| GC3  | MOL000211 |
| GC4  | MOL002311 |
| GC5  | MOL000239 |
| GC6  | MOL002565 |
| GC7  | MOL000359 |
| GC8  | MOL003656 |
| GC9  | MOL003896 |
| GC10 | MOL000392 |
| GC11 | MOL004805 |
| GC12 | MOL004806 |
| GC13 | MOL004808 |
| GC14 | MOL004810 |
| GC15 | MOL004811 |
| GC16 | MOL004814 |
| GC17 | MOL004815 |
| GC18 | MOL004820 |
| GC19 | MOL004828 |
| GC20 | MOL004829 |
| GC21 | MOL004833 |
| GC22 | MOL004835 |
| GC23 | MOL004838 |
| GC24 | MOL004848 |
| GC25 | MOL004849 |
| GC26 | MOL004855 |
| GC27 | MOL004856 |
| GC28 | MOL004857 |
| GC29 | MOL004863 |
| GC30 | MOL004864 |
| GC31 | MOL004866 |
| GC32 | MOL004879 |
| GC33 | MOL004882 |

---

---

|      |           |
|------|-----------|
| GC34 | MOL004883 |
| GC35 | MOL004884 |
| GC36 | MOL004885 |
| GC37 | MOL004891 |
| GC38 | MOL004907 |
| GC39 | MOL004908 |
| GC40 | MOL004910 |
| GC41 | MOL004911 |
| GC42 | MOL004912 |
| GC43 | MOL004913 |
| GC44 | MOL004915 |
| GC45 | MOL004941 |
| GC46 | MOL004945 |
| GC47 | MOL004948 |
| GC48 | MOL004957 |
| GC49 | MOL004959 |
| GC50 | MOL004966 |
| GC51 | MOL000497 |
| GC52 | MOL004974 |
| GC53 | MOL004978 |
| GC54 | MOL004980 |
| GC55 | MOL004985 |
| GC56 | MOL004988 |
| GC57 | MOL004989 |
| GC58 | MOL004991 |
| GC59 | MOL004996 |
| GC60 | MOL000500 |
| GC61 | MOL005000 |
| GC62 | MOL005001 |
| GC63 | MOL005003 |
| GC64 | MOL005007 |
| GC65 | MOL005012 |
| GC66 | MOL005016 |
| GC67 | MOL005017 |
| GC68 | MOL005018 |
| GC69 | MOL005020 |

---

**Supplementary Table 2 Therapeutic Targets of Sijunzi Decoction**

| COMPOUND | TARGET |
|----------|--------|
| BZ1      | PTGS2  |
| BZ1      | GABRA1 |
| BZ1      | NCOA2  |
| BZ1      | NCOA1  |
| BZ2      | PGR    |
| BZ3      | CHRM3  |
| BZ3      | CHRM1  |
| BZ3      | AR     |
| BZ3      | SCN5A  |
| BZ3      | PTGS2  |
| BZ3      | RXRA   |
| BZ3      | ACHE   |
| BZ3      | ADRA1A |
| BZ3      | CHRM2  |
| BZ3      | ADRB2  |
| BZ3      | OPRM1  |
| BZ3      | GABRA1 |
| BZ4      | PTGS2  |
| FL1      | NR3C2  |
| FL1      | NCOA2  |
| FL2      | NR3C2  |
| FL3      | NR3C2  |
| FL4      | PGR    |
| FL5      | PGR    |
| FL6      | PGR    |
| FL6      | NCOA2  |
| FL6      | CHRM3  |
| FL6      | CHRM1  |
| FL6      | GABRA2 |
| FL6      | GABRA3 |
| FL6      | CHRM2  |
| FL6      | ADRA1B |
| FL6      | GABRA1 |
| FL6      | GRIA2  |
| FL6      | GABRA6 |
| FL6      | GABRA5 |
| FL6      | IGHG1  |
| FL6      | ADH1B  |
| FL6      | ADH1C  |
| FL6      | LYZ    |



---

|     |         |
|-----|---------|
| FL6 | cobT    |
| FL6 | PTGS1   |
| FL6 | SCN5A   |
| FL6 | PTGS2   |
| FL6 | RXRA    |
| FL6 | PDE3A   |
| FL6 | SLC6A2  |
| FL6 | camC    |
| RS1 | NCOA2   |
| RS1 | NR3C1   |
| RS2 | BAX     |
| RS3 | TNF     |
| RS3 | CASP3   |
| RS3 | PTGS2   |
| RS3 | NFKBIA  |
| RS3 | IL1B    |
| RS3 | CASP1   |
| RS3 | IFNG    |
| RS3 | ADCYAP1 |
| RS3 | PSMG1   |
| RS3 | MAP2K4  |
| RS3 | SLC2A4  |
| RS3 | PGR     |
| RS4 | NCOA2   |
| RS4 | PTGS1   |
| RS4 | PTGS2   |
| RS4 | KCNH2   |
| RS4 | CHRM3   |
| RS4 | CHRM1   |
| RS4 | SCN5A   |
| RS4 | CHRM4   |
| RS4 | PDE3A   |
| RS4 | ADRA1A  |
| RS4 | CHRM2   |
| RS4 | ADRA1B  |
| RS4 | ADRB2   |
| RS4 | CHRNA2  |
| RS4 | SLC6A4  |
| RS4 | OPRM1   |
| RS4 | GABRA1  |
| RS4 | BCL2    |
| RS4 | BAX     |
| RS4 | CASP9   |
| RS4 | JUN     |

---

---

|     |        |
|-----|--------|
| RS4 | CASP3  |
| RS4 | CASP8  |
| RS4 | PRKCA  |
| RS4 | PON1   |
| RS4 | MAP2   |
| RS4 | PGR    |
| RS5 | AR     |
| RS6 | NR3C2  |
| RS6 | PTGS1  |
| RS7 | PTGS2  |
| RS7 | NOS2   |
| RS8 | PTGS1  |
| RS8 | AR     |
| RS8 | PTGS2  |
| RS8 | NCOA2  |
| RS8 | PRSS1  |
| RS8 | PGR    |
| RS8 | CHRM1  |
| RS8 | ACHE   |
| RS8 | SLC6A2 |
| RS8 | CHRM2  |
| RS8 | ADRA1B |
| RS8 | GABRA1 |
| RS8 | F7     |
| RS8 | RELA   |
| RS8 | IKBKB  |
| RS8 | AKT1   |
| RS8 | BCL2   |
| RS8 | BAX    |
| RS8 | TNF    |
| RS8 | JUN    |
| RS8 | AHSA1  |
| RS8 | CASP3  |
| RS8 | MAPK8  |
| RS8 | MMP1   |
| RS8 | STAT1  |
| RS8 | PPARG  |
| RS8 | HMOX1  |
| RS8 | CYP3A4 |
| RS8 | CYP1A2 |
| RS8 | CYP1A1 |
| RS8 | ICAM1  |
| RS8 | SELE   |
| RS8 | VCAM1  |

---

---

|      |        |
|------|--------|
| RS8  | NR1I2  |
| RS8  | CYP1B1 |
| RS8  | ALOX5  |
| RS8  | HAS2   |
| RS8  | GSTP1  |
| RS8  | AHR    |
| RS8  | PSMD3  |
| RS8  | SLC2A4 |
| RS8  | NR1I3  |
| RS8  | INSR   |
| RS8  | DIO1   |
| RS8  | PPP3CA |
| RS8  | GSTM1  |
| RS8  | GSTM2  |
| RS8  | AKR1C3 |
| RS8  | SLPI   |
| RS8  | SCN5A  |
| RS9  | ADRB2  |
| RS9  | CHRM3  |
| RS9  | PGR    |
| RS10 | NR3C2  |
| RS10 | NCOA2  |
| RS10 | ADH1C  |
| RS10 | RXRA   |
| RS10 | NCOA1  |
| RS10 | PTGS1  |
| RS10 | PTGS2  |
| RS10 | ADRA2A |
| RS10 | SLC6A2 |
| RS10 | SLC6A3 |
| RS10 | ADRB2  |
| RS10 | PLAU   |
| RS10 | LTA4H  |
| RS10 | MAOB   |
| RS10 | MAOA   |
| RS10 | CTRB1  |
| RS10 | CHRM3  |
| RS10 | CHRM1  |
| RS10 | ADRB1  |
| RS10 | SCN5A  |
| RS10 | ADRA1A |
| RS10 | CHRM2  |
| RS10 | ADRA1B |
| RS10 | GABRA1 |

---

---

|      |         |
|------|---------|
| RS11 | PTGS2   |
| RS11 | RXRG    |
| RS11 | NCOA2   |
| RS11 | KCNH2   |
| RS12 | SCN5A   |
| RS12 | PTGS2   |
| RS12 | F7      |
| RS12 | ADRB2   |
| RS12 | NCOA1   |
| RS12 | PTGS1   |
| RS12 | RXRA    |
| RS12 | PDE3A   |
| RS12 | ADRA1D  |
| RS13 | CHRM3   |
| RS13 | KCNH2   |
| RS13 | CHRM1   |
| RS13 | SCN5A   |
| RS13 | CHRM5   |
| RS13 | PTGS2   |
| RS13 | HTR3A   |
| RS13 | F7      |
| RS13 | CHRM4   |
| RS13 | OPRD1   |
| RS13 | ADRA1B  |
| RS13 | ADRB2   |
| RS13 | ADRA1D  |
| RS13 | OPRM1   |
| RS13 | SLC6A4  |
| RS13 | CACNA1S |
| RS13 | PDE3A   |
| RS13 | SLC6A3  |
| RS13 | PTGS1   |
| RS14 | SCN5A   |
| RS14 | PTGS2   |
| RS14 | RXRA    |
| RS14 | ADRB2   |
| RS14 | GABRA1  |
| RS14 | NCOA2   |
| RS14 | PRSS1   |
| RS15 | NCOA1   |
| RS15 | PTGS1   |
| RS16 | AR      |
| RS16 | SCN5A   |
| RS16 | PTGS2   |

---

---

|      |        |
|------|--------|
| RS16 | RXRA   |
| RS16 | PDE3A  |
| RS16 | ADRB2  |
| RS16 | GABRA1 |
| RS16 | CHRM3  |
| RS17 | CHRM1  |
| RS17 | SLC6A2 |
| RS17 | SLC6A3 |
| RS17 | ADRB2  |
| RS17 | SLC6A4 |
| RS17 | GABRA1 |
| GC1  | ADRB2  |
| GC1  | AR     |
| GC1  | CCNA2  |
| GC1  | CHEK1  |
| GC1  | ESR1   |
| GC1  | ESR2   |
| GC1  | MAPK14 |
| GC1  | NCOA2  |
| GC1  | NOS2   |
| GC1  | PRSS1  |
| GC1  | PTGS2  |
| GC1  | SCN5A  |
| GC10 | NCOA2  |
| GC11 | ACHE   |
| GC11 | ADRA1B |
| GC11 | ADRA1D |
| GC11 | ADRB2  |
| GC11 | AR     |
| GC11 | CHEK1  |
| GC11 | ESR1   |
| GC11 | GABRA1 |
| GC11 | GSK3B  |
| GC11 | MAPK14 |
| GC11 | NCOA2  |
| GC11 | NOS2   |
| GC11 | PDE3A  |
| GC11 | PRSS1  |
| GC11 | PTGS1  |
| GC11 | PTGS2  |
| GC11 | RXRA   |
| GC11 | SCN5A  |
| GC12 | NCOA2  |
| GC12 | ESR1   |

---

---

|      |        |
|------|--------|
| GC12 | F7     |
| GC12 | NOS2   |
| GC12 | PTGS2  |
| GC12 | SCN5A  |
| GC13 | ADRB2  |
| GC13 | AR     |
| GC13 | ESR1   |
| GC13 | NCOA2  |
| GC13 | PRSS1  |
| GC13 | PTGS1  |
| GC13 | PTGS2  |
| GC13 | SCN5A  |
| GC14 | ACHE   |
| GC14 | ADRA1B |
| GC14 | ADRB2  |
| GC14 | AR     |
| GC14 | CCNA2  |
| GC14 | CHEK1  |
| GC14 | CHRM1  |
| GC14 | CHRM3  |
| GC14 | ESR1   |
| GC14 | ESR2   |
| GC14 | GSK3B  |
| GC14 | KCNH2  |
| GC14 | MAPK14 |
| GC14 | NCOA1  |
| GC14 | NCOA2  |
| GC14 | NOS2   |
| GC14 | PRSS1  |
| GC14 | PTGS1  |
| GC14 | PTGS2  |
| GC14 | RXRA   |
| GC14 | RXRB   |
| GC14 | SCN5A  |
| GC14 | SLC6A3 |
| GC15 | ACHE   |
| GC15 | ADRA1B |
| GC15 | ADRB2  |
| GC15 | AR     |
| GC15 | CCNA2  |
| GC15 | CHEK1  |
| GC15 | ESR1   |
| GC15 | ESR2   |
| GC15 | F7     |

---

---

|      |        |
|------|--------|
| GC15 | GSK3B  |
| GC15 | KCNH2  |
| GC15 | MAPK14 |
| GC15 | NCOA1  |
| GC15 | NCOA2  |
| GC15 | NOS2   |
| GC15 | PRSS1  |
| GC15 | PTGS1  |
| GC15 | PTGS2  |
| GC15 | RXRA   |
| GC15 | SCN5A  |
| GC16 | ADRA1B |
| GC16 | ADRA1D |
| GC16 | ADRB2  |
| GC16 | AR     |
| GC16 | CCNA2  |
| GC16 | ESR1   |
| GC16 | ESR2   |
| GC16 | GSK3B  |
| GC16 | KCNH2  |
| GC16 | KDR    |
| GC16 | MAPK14 |
| GC16 | NCOA1  |
| GC16 | NCOA2  |
| GC16 | NOS2   |
| GC16 | PRSS1  |
| GC16 | PTGS1  |
| GC16 | PTGS2  |
| GC16 | RXRA   |
| GC16 | SCN5A  |
| GC17 | ADRB2  |
| GC17 | AR     |
| GC17 | CHRM1  |
| GC17 | ESR1   |
| GC17 | ESR2   |
| GC17 | NOS2   |
| GC17 | PDE3A  |
| GC17 | PTGS1  |
| GC17 | PTGS2  |
| GC17 | RXRA   |
| GC17 | SCN5A  |
| GC17 | SLC6A3 |
| GC17 | SLC6A4 |
| GC18 | AR     |

---

---

|      |        |
|------|--------|
| GC18 | ESR1   |
| GC18 | GSK3B  |
| GC18 | NOS2   |
| GC18 | PTGS2  |
| GC19 | ADRA1B |
| GC19 | ADRB2  |
| GC19 | ESR1   |
| GC19 | ESR2   |
| GC19 | NOS2   |
| GC19 | PDE3A  |
| GC19 | PTGS1  |
| GC19 | PTGS2  |
| GC19 | SCN5A  |
| GC2  | ESR1   |
| GC2  | ESR2   |
| GC2  | NCOA2  |
| GC2  | NOS2   |
| GC2  | PTGS2  |
| GC20 | ADRB2  |
| GC20 | ESR1   |
| GC20 | GABRA1 |
| GC20 | MAOB   |
| GC20 | PDE3A  |
| GC20 | PKIA   |
| GC20 | PTGS1  |
| GC20 | PTGS2  |
| GC20 | RXRA   |
| GC20 | SLC6A4 |
| GC21 | AR     |
| GC21 | CHEK1  |
| GC21 | ESR1   |
| GC21 | ESR2   |
| GC21 | GSK3B  |
| GC21 | MAPK14 |
| GC21 | NOS2   |
| GC21 | PTGS2  |
| GC21 | SCN5A  |
| GC22 | CCNA2  |
| GC22 | CHEK1  |
| GC22 | ESR1   |
| GC22 | ESR2   |
| GC22 | GSK3B  |
| GC22 | MAPK14 |
| GC23 | ACHE   |

---



---

|      |        |
|------|--------|
| GC23 | AR     |
| GC23 | CCNA2  |
| GC23 | CHEK1  |
| GC23 | ESR1   |
| GC23 | ESR2   |
| GC23 | GSK3B  |
| GC23 | MAPK14 |
| GC23 | NOS2   |
| GC23 | PRSS1  |
| GC23 | PTGS1  |
| GC23 | PTGS2  |
| GC23 | RXRA   |
| GC23 | SCN5A  |
| GC24 | ADRB2  |
| GC24 | AR     |
| GC24 | ESR1   |
| GC24 | ESR2   |
| GC24 | GSK3B  |
| GC24 | MAPK14 |
| GC24 | NCOA2  |
| GC24 | NOS2   |
| GC24 | PRSS1  |
| GC24 | PTGS1  |
| GC24 | PTGS2  |
| GC24 | RXRA   |
| GC24 | SCN5A  |
| GC25 | ESR1   |
| GC25 | NOS2   |
| GC25 | PDE3A  |
| GC25 | PTGS1  |
| GC25 | PTGS2  |
| GC25 | SCN5A  |
| GC26 | ACHE   |
| GC26 | ADRA1B |
| GC26 | ADRB2  |
| GC26 | AR     |
| GC26 | CCNA2  |
| GC26 | CHEK1  |
| GC26 | CHRM1  |
| GC26 | ESR1   |
| GC26 | ESR2   |
| GC26 | GSK3B  |
| GC26 | MAPK14 |
| GC26 | NCOA1  |

---

---

|      |        |
|------|--------|
| GC26 | NCOA2  |
| GC26 | NOS2   |
| GC26 | PRSS1  |
| GC26 | PTGS2  |
| GC26 | RXRA   |
| GC26 | RXRB   |
| GC26 | SCN5A  |
| GC27 | AR     |
| GC27 | CCNA2  |
| GC27 | CHEK1  |
| GC27 | ESR1   |
| GC27 | ESR2   |
| GC27 | GSK3B  |
| GC27 | MAPK14 |
| GC27 | NOS2   |
| GC27 | PRSS1  |
| GC27 | PTGS1  |
| GC27 | PTGS2  |
| GC28 | ADRA1B |
| GC28 | ADRA1D |
| GC28 | ADRB2  |
| GC28 | AR     |
| GC28 | CCNA2  |
| GC28 | CHRM1  |
| GC28 | CHRM3  |
| GC28 | ESR1   |
| GC28 | ESR2   |
| GC28 | GSK3B  |
| GC28 | HTR3A  |
| GC28 | KCNH2  |
| GC28 | MAPK14 |
| GC28 | NCOA1  |
| GC28 | NOS2   |
| GC28 | OPRD1  |
| GC28 | OPRM1  |
| GC28 | PRSS1  |
| GC28 | PTGS1  |
| GC28 | PTGS2  |
| GC28 | RXRA   |
| GC28 | RXRB   |
| GC28 | SCN5A  |
| GC29 | ACHE   |
| GC29 | AR     |
| GC29 | CCNA2  |

---

---

|      |        |
|------|--------|
| GC29 | ESR1   |
| GC29 | ESR2   |
| GC29 | F7     |
| GC29 | GSK3B  |
| GC29 | NCOA1  |
| GC29 | NOS2   |
| GC29 | PRSS1  |
| GC29 | PTGS1  |
| GC29 | PTGS2  |
| GC29 | SCN5A  |
| GC3  | AR     |
| GC3  | CCNA2  |
| GC3  | CHEK1  |
| GC3  | ESR1   |
| GC3  | GSK3B  |
| GC3  | KDR    |
| GC3  | MAPK14 |
| GC3  | PTGS2  |
| GC30 | ACHE   |
| GC30 | AR     |
| GC30 | CCNA2  |
| GC30 | CHEK1  |
| GC30 | ESR1   |
| GC30 | ESR2   |
| GC30 | GSK3B  |
| GC30 | NOS2   |
| GC30 | PRSS1  |
| GC30 | PTGS2  |
| GC31 | AR     |
| GC31 | CCNA2  |
| GC31 | CHEK1  |
| GC31 | ESR1   |
| GC31 | KDR    |
| GC31 | MAPK14 |
| GC31 | NCOA2  |
| GC31 | NOS2   |
| GC31 | PRSS1  |
| GC31 | PTGS2  |
| GC32 | AR     |
| GC32 | CCNA2  |
| GC32 | ESR1   |
| GC32 | ESR2   |
| GC32 | GSK3B  |
| GC33 | AR     |

---

---

|      |        |
|------|--------|
| GC33 | CHEK1  |
| GC33 | ESR1   |
| GC33 | ESR2   |
| GC33 | KCNH2  |
| GC33 | KDR    |
| GC33 | NCOA2  |
| GC33 | NOS2   |
| GC33 | PRSS1  |
| GC33 | PTGS2  |
| GC34 | ESR1   |
| GC34 | ESR2   |
| GC34 | GSK3B  |
| GC34 | KCNH2  |
| GC34 | MAPK14 |
| GC34 | NOS2   |
| GC34 | ADRB2  |
| GC34 | AR     |
| GC34 | CCNA2  |
| GC34 | CHEK1  |
| GC34 | F7     |
| GC34 | PRSS1  |
| GC34 | PTGS2  |
| GC34 | SCN5A  |
| GC35 | AR     |
| GC35 | CCNA2  |
| GC35 | CHEK1  |
| GC35 | ESR1   |
| GC35 | GSK3B  |
| GC35 | MAPK14 |
| GC35 | NCOA2  |
| GC35 | NOS2   |
| GC35 | PRSS1  |
| GC35 | PTGS2  |
| GC36 | ADRA1B |
| GC36 | ADRB2  |
| GC36 | AR     |
| GC36 | CCNA2  |
| GC36 | CHEK1  |
| GC36 | ESR1   |
| GC36 | ESR2   |
| GC36 | F7     |
| GC36 | GSK3B  |
| GC36 | KDR    |
| GC36 | NCOA2  |

---

---

|      |        |
|------|--------|
| GC36 | NOS2   |
| GC36 | PRSS1  |
| GC36 | PTGS2  |
| GC37 | ACHE   |
| GC37 | AR     |
| GC37 | CCNA2  |
| GC37 | CHEK1  |
| GC37 | ESR1   |
| GC37 | ESR2   |
| GC37 | GSK3B  |
| GC37 | NCOA2  |
| GC37 | NOS2   |
| GC37 | PRSS1  |
| GC37 | PTGS2  |
| GC37 | SCN5A  |
| GC38 | ESR2   |
| GC38 | F7     |
| GC38 | GSK3B  |
| GC38 | MAPK14 |
| GC38 | NCOA1  |
| GC38 | AR     |
| GC38 | CHEK1  |
| GC38 | ESR1   |
| GC38 | KCNH2  |
| GC38 | KDR    |
| GC38 | NCOA2  |
| GC38 | NOS2   |
| GC38 | PRSS1  |
| GC38 | PTGS2  |
| GC39 | ESR1   |
| GC39 | NOS2   |
| GC39 | PTGS2  |
| GC39 | RXRA   |
| GC4  | AR     |
| GC4  | CCNA2  |
| GC4  | CHEK1  |
| GC4  | ESR1   |
| GC4  | ESR2   |
| GC4  | GSK3B  |
| GC4  | MAPK14 |
| GC4  | NCOA2  |
| GC4  | NOS2   |
| GC4  | PRSS1  |
| GC4  | PTGS1  |

---

---

|      |        |
|------|--------|
| GC4  | PTGS2  |
| GC4  | RXRA   |
| GC4  | SCN5A  |
| GC40 | ADRA1B |
| GC40 | ADRB2  |
| GC40 | AR     |
| GC40 | CCNA2  |
| GC40 | CHEK1  |
| GC40 | CHRM1  |
| GC40 | ESR1   |
| GC40 | ESR2   |
| GC40 | GSK3B  |
| GC40 | LTA4H  |
| GC40 | MAOB   |
| GC40 | MAPK14 |
| GC40 | NCOA1  |
| GC40 | PDE3A  |
| GC40 | PKIA   |
| GC40 | PTGS1  |
| GC40 | PTGS2  |
| GC40 | SCN5A  |
| GC40 | SLC6A3 |
| GC40 | SLC6A4 |
| GC41 | F7     |
| GC41 | PDE3A  |
| GC41 | PTGS1  |
| GC41 | ACHE   |
| GC41 | ADRA1B |
| GC41 | ADRB2  |
| GC41 | AR     |
| GC41 | CCNA2  |
| GC41 | CHEK1  |
| GC41 | CHRM1  |
| GC41 | ESR1   |
| GC41 | ESR2   |
| GC41 | GSK3B  |
| GC41 | MAPK14 |
| GC41 | NCOA1  |
| GC41 | NOS2   |
| GC41 | PRSS1  |
| GC41 | PTGS2  |
| GC41 | RXRA   |
| GC41 | SCN5A  |
| GC42 | AR     |

---

---

|      |        |
|------|--------|
| GC42 | CCNA2  |
| GC42 | CHEK1  |
| GC42 | ESR1   |
| GC42 | F7     |
| GC42 | GSK3B  |
| GC42 | KDR    |
| GC42 | MAPK14 |
| GC42 | NOS2   |
| GC42 | PDE3A  |
| GC42 | PRSS1  |
| GC42 | PTGS1  |
| GC42 | PTGS2  |
| GC42 | RXRA   |
| GC42 | SCN5A  |
| GC42 | ADRA1B |
| GC43 | AR     |
| GC43 | CCNA2  |
| GC43 | CHEK1  |
| GC43 | ESR1   |
| GC43 | ESR2   |
| GC43 | GSK3B  |
| GC43 | MAPK14 |
| GC43 | NCOA1  |
| GC43 | NCOA2  |
| GC43 | NOS2   |
| GC43 | PRSS1  |
| GC43 | PTGS1  |
| GC43 | PTGS2  |
| GC43 | RXRA   |
| GC43 | SCN5A  |
| GC44 | ADRA1B |
| GC44 | AR     |
| GC44 | CCNA2  |
| GC44 | CHEK1  |
| GC44 | ESR1   |
| GC44 | ESR2   |
| GC44 | GSK3B  |
| GC44 | MAPK14 |
| GC44 | NCOA2  |
| GC44 | NOS2   |
| GC44 | PTGS1  |
| GC44 | PTGS2  |
| GC44 | RXRA   |
| GC44 | SCN5A  |

---

---

|      |        |
|------|--------|
| GC45 | AR     |
| GC45 | CCNA2  |
| GC45 | CHEK1  |
| GC45 | ESR1   |
| GC45 | ESR2   |
| GC45 | GSK3B  |
| GC45 | MAPK14 |
| GC45 | NOS2   |
| GC45 | PTGS2  |
| GC46 | ACHE   |
| GC46 | AR     |
| GC46 | CCNA2  |
| GC46 | CHEK1  |
| GC46 | ESR1   |
| GC46 | ESR2   |
| GC46 | GSK3B  |
| GC46 | KCNH2  |
| GC46 | MAPK14 |
| GC46 | NCOA2  |
| GC46 | NOS2   |
| GC46 | PRSS1  |
| GC46 | PTGS2  |
| GC46 | RXRA   |
| GC46 | SCN5A  |
| GC47 | AR     |
| GC47 | CCNA2  |
| GC47 | ESR1   |
| GC47 | ESR2   |
| GC47 | GSK3B  |
| GC47 | MAPK14 |
| GC47 | NOS2   |
| GC47 | PRSS1  |
| GC47 | PTGS1  |
| GC47 | PTGS2  |
| GC47 | SCN5A  |
| GC48 | ACHE   |
| GC48 | AR     |
| GC48 | CCNA2  |
| GC48 | ESR1   |
| GC48 | ESR2   |
| GC48 | F7     |
| GC48 | GSK3B  |
| GC48 | KDR    |
| GC48 | NCOA2  |

---



---

|      |        |
|------|--------|
| GC48 | NOS2   |
| GC48 | PRSS1  |
| GC48 | PTGS2  |
| GC49 | ESR1   |
| GC49 | ESR2   |
| GC49 | KCNH2  |
| GC49 | NOS2   |
| GC49 | PTGS2  |
| GC49 | SCN5A  |
| GC5  | AR     |
| GC5  | CCNA2  |
| GC5  | CHEK1  |
| GC5  | ESR1   |
| GC5  | ESR2   |
| GC5  | GSK3B  |
| GC5  | MAPK14 |
| GC5  | NOS2   |
| GC5  | PRSS1  |
| GC5  | PTGS2  |
| GC5  | SCN5A  |
| GC50 | AR     |
| GC50 | ESR1   |
| GC50 | ESR2   |
| GC50 | GSK3B  |
| GC50 | KCNH2  |
| GC50 | MAPK14 |
| GC50 | NOS2   |
| GC50 | PTGS2  |
| GC51 | SLC6A4 |
| GC52 | ACHE   |
| GC52 | ADRA1B |
| GC52 | ADRA1D |
| GC52 | ADRB1  |
| GC52 | ADRB2  |
| GC52 | AR     |
| GC52 | CCNA2  |
| GC52 | CHEK1  |
| GC52 | CHRM1  |
| GC52 | CHRM3  |
| GC52 | CHRM5  |
| GC52 | ESR1   |
| GC52 | ESR2   |
| GC52 | GABRA1 |
| GC52 | GSK3B  |

---

---

|      |        |
|------|--------|
| GC52 | LTA4H  |
| GC52 | MAOB   |
| GC52 | MAPK14 |
| GC52 | NCOA1  |
| GC52 | NCOA2  |
| GC52 | NOS2   |
| GC52 | OPRM1  |
| GC52 | PDE3A  |
| GC52 | PKIA   |
| GC52 | PRSS1  |
| GC52 | PTGS1  |
| GC52 | PTGS2  |
| GC52 | RXRA   |
| GC52 | SCN5A  |
| GC52 | SLC6A3 |
| GC53 | SCN5A  |
| GC53 | SLC6A3 |
| GC53 | SLC6A4 |
| GC53 | AR     |
| GC53 | ESR1   |
| GC53 | ESR2   |
| GC53 | GSK3B  |
| GC53 | MAPK14 |
| GC53 | NOS2   |
| GC54 | ADRA1A |
| GC54 | ADRA1B |
| GC54 | ADRB2  |
| GC54 | CCNA2  |
| GC54 | CHRM1  |
| GC54 | CHRM2  |
| GC54 | CHRM3  |
| GC54 | CHRM4  |
| GC54 | CHRM5  |
| GC54 | ESR1   |
| GC54 | ESR2   |
| GC54 | MAPK10 |
| GC54 | NOS2   |
| GC54 | OPRM1  |
| GC54 | PRSS1  |
| GC54 | PTGS1  |
| GC54 | PTGS2  |
| GC54 | RXRA   |
| GC55 | CCNA2  |
| GC55 | CHEK1  |

---

---

|      |        |
|------|--------|
| GC55 | ESR1   |
| GC55 | GSK3B  |
| GC55 | KDR    |
| GC55 | MAPK14 |
| GC55 | NOS2   |
| GC55 | PTGS2  |
| GC56 | ADRB2  |
| GC56 | ESR1   |
| GC56 | MAOB   |
| GC56 | PKIA   |
| GC56 | PTGS1  |
| GC56 | PTGS2  |
| GC56 | RXRA   |
| GC56 | SLC6A4 |
| GC57 | ADRA1B |
| GC57 | ADRA1D |
| GC57 | ADRB2  |
| GC57 | CHRM1  |
| GC57 | CHRM3  |
| GC57 | HTR3A  |
| GC57 | OPRM1  |
| GC57 | PRSS1  |
| GC57 | PTGS1  |
| GC57 | PTGS2  |
| GC57 | RXRA   |
| GC57 | SCN5A  |
| GC58 | ADRA1A |
| GC58 | ADRA1B |
| GC58 | ADRB2  |
| GC58 | AR     |
| GC58 | CCNA2  |
| GC58 | CHEK1  |
| GC58 | CHRM1  |
| GC58 | CHRM4  |
| GC58 | ESR1   |
| GC58 | ESR2   |
| GC58 | GSK3B  |
| GC58 | MAPK14 |
| GC58 | NOS2   |
| GC58 | PDE3A  |
| GC58 | PKIA   |
| GC58 | PRSS1  |
| GC58 | PTGS1  |
| GC58 | PTGS2  |

---

---

|      |        |
|------|--------|
| GC58 | RXRA   |
| GC58 | SCN5A  |
| GC58 | SLC6A3 |
| GC58 | SLC6A4 |
| GC59 | ADRA1B |
| GC59 | ADRB2  |
| GC59 | AR     |
| GC59 | BCL2   |
| GC59 | CCNA2  |
| GC59 | CCND1  |
| GC59 | CHEK1  |
| GC59 | CHRM1  |
| GC59 | EIF6   |
| GC59 | ESR1   |
| GC59 | ESR2   |
| GC59 | FOSL2  |
| GC59 | GSK3B  |
| GC59 | MAPK1  |
| GC59 | MAPK14 |
| GC59 | NCOA2  |
| GC59 | NOS2   |
| GC59 | PTGS1  |
| GC59 | PTGS2  |
| GC59 | RB1    |
| GC59 | RELA   |
| GC59 | SCN5A  |
| GC59 | SLC6A3 |
| GC59 | STAT3  |
| GC6  | ACHE   |
| GC6  | AR     |
| GC6  | CCNA2  |
| GC6  | ESR1   |
| GC6  | ESR2   |
| GC6  | F7     |
| GC6  | GSK3B  |
| GC6  | KCNH2  |
| GC6  | KDR    |
| GC6  | NCOA1  |
| GC6  | NCOA2  |
| GC6  | NOS2   |
| GC6  | PRSS1  |
| GC6  | PTGS1  |
| GC6  | PTGS2  |
| GC6  | SCN5A  |

---

---

|      |         |
|------|---------|
| GC60 | ACHE    |
| GC60 | ADRA1A  |
| GC60 | ADRB2   |
| GC60 | AR      |
| GC60 | ATP5F1B |
| GC60 | CCNA2   |
| GC60 | CHEK1   |
| GC60 | CHRM1   |
| GC60 | ESR1    |
| GC60 | ESR2    |
| GC60 | GSK3B   |
| GC60 | HSD3B1  |
| GC60 | HSD3B2  |
| GC60 | IL4     |
| GC60 | JUN     |
| GC60 | MAOB    |
| GC60 | MAPK14  |
| GC60 | MT-ND6  |
| GC60 | NOS2    |
| GC60 | PDE3A   |
| GC60 | PKIA    |
| GC60 | PPARG   |
| GC60 | PRSS1   |
| GC60 | PTGS1   |
| GC60 | PTGS2   |
| GC60 | RXRA    |
| GC60 | SLC6A3  |
| GC60 | SLC6A4  |
| GC61 | AR      |
| GC61 | CHEK1   |
| GC61 | ESR2    |
| GC61 | NOS2    |
| GC61 | PRSS1   |
| GC61 | PTGS1   |
| GC61 | PTGS2   |
| GC61 | SCN5A   |
| GC61 | NCOA2   |
| GC61 | NR3C2   |
| GC61 | PGR     |
| GC62 | PGR     |
| GC7  | ACHE    |
| GC7  | ADRA1B  |
| GC7  | ADRB2   |
| GC7  | AR      |

---

---

|     |        |
|-----|--------|
| GC7 | CCNA2  |
| GC7 | CHRM1  |
| GC7 | CHRM3  |
| GC7 | CHRM5  |
| GC7 | ESR1   |
| GC7 | ESR2   |
| GC7 | GSK3B  |
| GC7 | KCNH2  |
| GC7 | MAPK14 |
| GC7 | NCOA2  |
| GC7 | NOS2   |
| GC7 | PRSS1  |
| GC7 | PTGS1  |
| GC7 | PTGS2  |
| GC7 | RXRA   |
| GC7 | RXRB   |
| GC7 | SCN5A  |
| GC8 | AR     |
| GC8 | CCNA2  |
| GC8 | ESR1   |
| GC8 | KDR    |
| GC8 | NCOA2  |
| GC8 | PRSS1  |
| GC8 | PTGS2  |
| GC9 | AR     |
| GC9 | CHEK1  |
| GC9 | ESR1   |
| GC9 | ESR2   |
| GC9 | GSK3B  |
| GC9 | MAPK14 |
| GC9 | NOS2   |
| GC9 | PTGS2  |

---

**Supplementary Table 3 Genes related to ulcerative colitis in the database**

| <b>Database</b> | <b>Disease</b>     | <b>Gene</b> |
|-----------------|--------------------|-------------|
| Disgnet         | Ulcerative Colitis | IL23R       |
| Disgnet         | Ulcerative Colitis | NOD2        |
| Disgnet         | Ulcerative Colitis | PTPN2       |
| Disgnet         | Ulcerative Colitis | CCL20       |
| Disgnet         | Ulcerative Colitis | ICAM1       |
| Disgnet         | Ulcerative Colitis | IL1B        |
| Disgnet         | Ulcerative Colitis | TNF         |
| Disgnet         | Ulcerative Colitis | IRF5        |
| Disgnet         | Ulcerative Colitis | FCGR2A      |
| Disgnet         | Ulcerative Colitis | HLA-DRB1    |
| Disgnet         | Ulcerative Colitis | IL10        |
| Disgnet         | Ulcerative Colitis | STAT3       |
| Disgnet         | Ulcerative Colitis | TNFSF15     |
| Disgnet         | Ulcerative Colitis | MST1        |
| Disgnet         | Ulcerative Colitis | IRGM        |
| Disgnet         | Ulcerative Colitis | CARD9       |
| Disgnet         | Ulcerative Colitis | CCNY        |
| Disgnet         | Ulcerative Colitis | IL7R        |
| Disgnet         | Ulcerative Colitis | IL17REL     |
| Disgnet         | Ulcerative Colitis | ADCY7       |
| Disgnet         | Ulcerative Colitis | GNA12       |
| Disgnet         | Ulcerative Colitis | CDH3        |
| Disgnet         | Ulcerative Colitis | MASP2       |
| Disgnet         | Ulcerative Colitis | NKX2-3      |
| Disgnet         | Ulcerative Colitis | DAP         |
| Disgnet         | Ulcerative Colitis | CXCL8       |
| Disgnet         | Ulcerative Colitis | IL12B       |
| Disgnet         | Ulcerative Colitis | MMP9        |
| Disgnet         | Ulcerative Colitis | MPO         |
| Disgnet         | Ulcerative Colitis | ABCB1       |
| Disgnet         | Ulcerative Colitis | PRDM1       |
| Disgnet         | Ulcerative Colitis | GPR65       |
| Disgnet         | Ulcerative Colitis | JAK2        |
| Disgnet         | Ulcerative Colitis | CDH1        |
| Disgnet         | Ulcerative Colitis | ECM1        |
| Disgnet         | Ulcerative Colitis | HNF4A       |
| Disgnet         | Ulcerative Colitis | RELA        |
| Disgnet         | Ulcerative Colitis | CCR6        |

|          |                    |          |
|----------|--------------------|----------|
| Disgnent | Ulcerative Colitis | SLC11A1  |
| Disgnent | Ulcerative Colitis | ORMDL3   |
| Disgnent | Ulcerative Colitis | SLC26A3  |
| Disgnent | Ulcerative Colitis | LAMB1    |
| Disgnent | Ulcerative Colitis | ARPC2    |
| Disgnent | Ulcerative Colitis | ICOSLG   |
| Disgnent | Ulcerative Colitis | IL10RA   |
| Disgnent | Ulcerative Colitis | IL1R2    |
| Disgnent | Ulcerative Colitis | RIPK2    |
| Disgnent | Ulcerative Colitis | SPHK1    |
| Disgnent | Ulcerative Colitis | HERC2    |
| Disgnent | Ulcerative Colitis | DEFA5    |
| Disgnent | Ulcerative Colitis | KIF21B   |
| Disgnent | Ulcerative Colitis | CXCR2    |
| Disgnent | Ulcerative Colitis | IL10RB   |
| Disgnent | Ulcerative Colitis | CASP3    |
| Disgnent | Ulcerative Colitis | PSMG1    |
| Disgnent | Ulcerative Colitis | IL18RAP  |
| Disgnent | Ulcerative Colitis | IKZF1    |
| Disgnent | Ulcerative Colitis | DEFA6    |
| Disgnent | Ulcerative Colitis | CXCR1    |
| Disgnent | Ulcerative Colitis | LSP1     |
| Disgnent | Ulcerative Colitis | LTF      |
| Disgnent | Ulcerative Colitis | GHRL     |
| Disgnent | Ulcerative Colitis | PTGS2    |
| Disgnent | Ulcerative Colitis | VCAM1    |
| Disgnent | Ulcerative Colitis | MUC2     |
| Disgnent | Ulcerative Colitis | MMP1     |
| Disgnent | Ulcerative Colitis | FAS      |
| Disgnent | Ulcerative Colitis | PTGS1    |
| Disgnent | Ulcerative Colitis | COL18A1  |
| Disgnent | Ulcerative Colitis | ADRB2    |
| Disgnent | Ulcerative Colitis | FASLG    |
| Disgnent | Ulcerative Colitis | IL6      |
| Disgnent | Ulcerative Colitis | NFKB1    |
| Disgnent | Ulcerative Colitis | ATG16L1  |
| Disgnent | Ulcerative Colitis | TLR4     |
| Disgnent | Ulcerative Colitis | PTPN22   |
| Disgnent | Ulcerative Colitis | IL27     |
| Disgnent | Ulcerative Colitis | STAT4    |
| Disgnent | Ulcerative Colitis | CD40     |
| Disgnent | Ulcerative Colitis | NOS2     |
| Disgnent | Ulcerative Colitis | IL2RA    |
| Disgnent | Ulcerative Colitis | TNFRSF1A |



|          |                    |                |
|----------|--------------------|----------------|
| Disgnent | Ulcerative Colitis | AHR            |
| Disgnent | Ulcerative Colitis | FUT2           |
| Disgnent | Ulcerative Colitis | IL19           |
| Disgnent | Ulcerative Colitis | HLA-DRA        |
| Disgnent | Ulcerative Colitis | SMAD3          |
| Disgnent | Ulcerative Colitis | TCF4           |
| Disgnent | Ulcerative Colitis | TNFAIP3        |
| Disgnent | Ulcerative Colitis | SLC44A4        |
| Disgnent | Ulcerative Colitis | CD28           |
| Disgnent | Ulcerative Colitis | ETS1           |
| Disgnent | Ulcerative Colitis | HLA-DQA1       |
| Disgnent | Ulcerative Colitis | IL1R1          |
| Disgnent | Ulcerative Colitis | IL6R           |
| Disgnent | Ulcerative Colitis | IL26           |
| Disgnent | Ulcerative Colitis | CFB            |
| Disgnent | Ulcerative Colitis | UBE2L3         |
| Disgnent | Ulcerative Colitis | TNFRSF6B       |
| Disgnent | Ulcerative Colitis | IFNG-AS1       |
| Disgnent | Ulcerative Colitis | ADCY3          |
| Disgnent | Ulcerative Colitis | ZFP90          |
| Disgnent | Ulcerative Colitis | DNMT3A         |
| Disgnent | Ulcerative Colitis | ZNF365         |
| Disgnent | Ulcerative Colitis | NR5A2          |
| Disgnent | Ulcerative Colitis | GPR35          |
| Disgnent | Ulcerative Colitis | IFNGR2         |
| Disgnent | Ulcerative Colitis | ITGAL          |
| Disgnent | Ulcerative Colitis | NFATC1         |
| Disgnent | Ulcerative Colitis | NOTCH1         |
| Disgnent | Ulcerative Colitis | CDKAL1         |
| Disgnent | Ulcerative Colitis | GSDMB          |
| Disgnent | Ulcerative Colitis | ZMIZ1          |
| Disgnent | Ulcerative Colitis | BACH2          |
| Disgnent | Ulcerative Colitis | TYK2           |
| Disgnent | Ulcerative Colitis | PRRC2A         |
| Disgnent | Ulcerative Colitis | KIAA1109       |
| Disgnent | Ulcerative Colitis | TNFRSF14       |
| Disgnent | Ulcerative Colitis | IL18R1         |
| Disgnent | Ulcerative Colitis | BSN            |
| Disgnent | Ulcerative Colitis | LINC00484      |
| Disgnent | Ulcerative Colitis | SPATA48        |
| Disgnent | Ulcerative Colitis | SH2B3          |
| Disgnent | Ulcerative Colitis | TOM1           |
| Disgnent | Ulcerative Colitis | MSH5-SAPCD1    |
| Disgnent | Ulcerative Colitis | RTEL1-TNFRSF6B |

|          |                    |           |
|----------|--------------------|-----------|
| Disgnent | Ulcerative Colitis | C5orf66   |
| Disgnent | Ulcerative Colitis | ACTR1A    |
| Disgnent | Ulcerative Colitis | MMP24OS   |
| Disgnent | Ulcerative Colitis | LINC01804 |
| Disgnent | Ulcerative Colitis | LINC01475 |
| Disgnent | Ulcerative Colitis | LINC01250 |
| Disgnent | Ulcerative Colitis | LINC00824 |
| Disgnent | Ulcerative Colitis | LINC01147 |
| Disgnent | Ulcerative Colitis | LINC00993 |
| Disgnent | Ulcerative Colitis | GLYAT     |
| Disgnent | Ulcerative Colitis | LINC02863 |
| Disgnent | Ulcerative Colitis | CCR5AS    |
| Disgnent | Ulcerative Colitis | CDKN2A    |
| Disgnent | Ulcerative Colitis | TNIP1     |
| Disgnent | Ulcerative Colitis | PROCR     |
| Disgnent | Ulcerative Colitis | RGS14     |
| Disgnent | Ulcerative Colitis | CD226     |
| Disgnent | Ulcerative Colitis | MTCO2P12  |
| Disgnent | Ulcerative Colitis | CIT       |
| Disgnent | Ulcerative Colitis | FGFR1OP   |
| Disgnent | Ulcerative Colitis | PKIG      |
| Disgnent | Ulcerative Colitis | CHP1      |
| Disgnent | Ulcerative Colitis | SP140     |
| Disgnent | Ulcerative Colitis | ATXN2L    |
| Disgnent | Ulcerative Colitis | IL17F     |
| Disgnent | Ulcerative Colitis | PARK7     |
| Disgnent | Ulcerative Colitis | NLRP3     |
| Disgnent | Ulcerative Colitis | RMI2      |
| Disgnent | Ulcerative Colitis | ANTXR2    |
| Disgnent | Ulcerative Colitis | NXPE1     |
| Disgnent | Ulcerative Colitis | LRRK2     |
| Disgnent | Ulcerative Colitis | NRAD1     |
| Disgnent | Ulcerative Colitis | ZPBP2     |
| Disgnent | Ulcerative Colitis | RAVER1    |
| Disgnent | Ulcerative Colitis | ZNF831    |
| Disgnent | Ulcerative Colitis | RBM45     |
| Disgnent | Ulcerative Colitis | ADAD1     |
| Disgnent | Ulcerative Colitis | CREM      |
| Disgnent | Ulcerative Colitis | CRP       |
| Disgnent | Ulcerative Colitis | LINC01620 |
| Disgnent | Ulcerative Colitis | CTLA4     |
| Disgnent | Ulcerative Colitis | HORMAD2   |
| Disgnent | Ulcerative Colitis | PUS10     |
| Disgnent | Ulcerative Colitis | CMC1      |

|          |                    |          |
|----------|--------------------|----------|
| Disgnent | Ulcerative Colitis | AMZ1     |
| Disgnent | Ulcerative Colitis | CYP21A2  |
| Disgnent | Ulcerative Colitis | DAG1     |
| Disgnent | Ulcerative Colitis | DENND1B  |
| Disgnent | Ulcerative Colitis | NR0B1    |
| Disgnent | Ulcerative Colitis | CELSR3   |
| Disgnent | Ulcerative Colitis | SLC39A11 |
| Disgnent | Ulcerative Colitis | HIPK1    |
| Disgnent | Ulcerative Colitis | ERN1     |
| Disgnent | Ulcerative Colitis | ALB      |
| Disgnent | Ulcerative Colitis | JAZF1    |
| Disgnent | Ulcerative Colitis | FNDC3A   |
| Disgnent | Ulcerative Colitis | SBNO2    |
| Disgnent | Ulcerative Colitis | FNBP1    |
| Disgnent | Ulcerative Colitis | TBC1D9   |
| Disgnent | Ulcerative Colitis | RTF1     |
| Disgnent | Ulcerative Colitis | OTUD3    |
| Disgnent | Ulcerative Colitis | ADGRL2   |
| Disgnent | Ulcerative Colitis | CLEC16A  |
| Disgnent | Ulcerative Colitis | SLC9A8   |
| Disgnent | Ulcerative Colitis | CRB1     |
| Disgnent | Ulcerative Colitis | GABPA    |
| Disgnent | Ulcerative Colitis | PNKD     |
| Disgnent | Ulcerative Colitis | GBAP1    |
| Disgnent | Ulcerative Colitis | GCKR     |
| Disgnent | Ulcerative Colitis | ACAD8    |
| Disgnent | Ulcerative Colitis | FAM177A1 |
| Disgnent | Ulcerative Colitis | GPR18    |
| Disgnent | Ulcerative Colitis | LURAP1L  |
| Disgnent | Ulcerative Colitis | UQCR10   |
| Disgnent | Ulcerative Colitis | HLA-B    |
| Disgnent | Ulcerative Colitis | HLA-DRB9 |
| Disgnent | Ulcerative Colitis | APEH     |
| Disgnent | Ulcerative Colitis | HSPA1L   |
| Disgnent | Ulcerative Colitis | UBAC2    |
| Disgnent | Ulcerative Colitis | DUPD1    |
| Disgnent | Ulcerative Colitis | C17orf67 |
| Disgnent | Ulcerative Colitis | IFNG     |
| Disgnent | Ulcerative Colitis | IL1A     |
| Disgnent | Ulcerative Colitis | IL1RN    |
| Disgnent | Ulcerative Colitis | IL2      |
| Disgnent | Ulcerative Colitis | IL4      |
| Disgnent | Ulcerative Colitis | IL9      |
| Disgnent | Ulcerative Colitis | IL13     |

|          |                    |           |
|----------|--------------------|-----------|
| Disgnent | Ulcerative Colitis | IL17A     |
| Disgnent | Ulcerative Colitis | LINC02213 |
| Disgnent | Ulcerative Colitis | EEF1AKMT2 |
| Disgnent | Ulcerative Colitis | C1orf141  |
| Disgnent | Ulcerative Colitis | LINC01185 |
| Disgnent | Ulcerative Colitis | TEX41     |
| Disgnent | Ulcerative Colitis | ARSA      |
| Disgnent | Ulcerative Colitis | MPZ       |
| Disgnent | Ulcerative Colitis | IRF1-AS1  |
| Disgnent | Ulcerative Colitis | MSH5      |
| Disgnent | Ulcerative Colitis | COX2      |
| Disgnent | Ulcerative Colitis | NFE2L2    |
| Disgnent | Ulcerative Colitis | DELEC1    |
| Disgnent | Ulcerative Colitis | IL22      |
| Disgnent | Ulcerative Colitis | IBD5      |
| Disgnent | Ulcerative Colitis | FOXP3     |
| Disgnent | Ulcerative Colitis | IGF2-AS   |
| Disgnent | Ulcerative Colitis | SFMBT1    |
| Disgnent | Ulcerative Colitis | IL23A     |
| Disgnent | Ulcerative Colitis | HDAC7     |
| Disgnent | Ulcerative Colitis | DPH5      |
| Disgnent | Ulcerative Colitis | RTEL1     |
| Disgnent | Ulcerative Colitis | ERAP1     |
| Disgnent | Ulcerative Colitis | PLAU      |
| Disgnent | Ulcerative Colitis | PLCL1     |
| Disgnent | Ulcerative Colitis | UBASH3A   |
| Disgnent | Ulcerative Colitis | PLCG2     |
| Disgnent | Ulcerative Colitis | PMP22     |
| Disgnent | Ulcerative Colitis | CCHCR1    |
| Disgnent | Ulcerative Colitis | PPARG     |
| Disgnent | Ulcerative Colitis | TET2      |
| Disgnent | Ulcerative Colitis | INTS11    |
| Disgnent | Ulcerative Colitis | FAM118A   |
| Disgnent | Ulcerative Colitis | PPP2R3C   |
| Disgnent | Ulcerative Colitis | BANK1     |
| Disgnent | Ulcerative Colitis | RIC8B     |
| Disgnent | Ulcerative Colitis | INAVA     |
| Disgnent | Ulcerative Colitis | PRKCB     |
| Disgnent | Ulcerative Colitis | PRKCQ     |
| Disgnent | Ulcerative Colitis | PTGIR     |
| Disgnent | Ulcerative Colitis | PTPRC     |
| Disgnent | Ulcerative Colitis | ACTA2     |
| Disgnent | Ulcerative Colitis | RDX       |
| Disgnent | Ulcerative Colitis | BRD2      |

|          |                    |              |
|----------|--------------------|--------------|
| Disgnent | Ulcerative Colitis | RPS6KB1      |
| Disgnent | Ulcerative Colitis | ATXN2        |
| Disgnent | Ulcerative Colitis | THADA        |
| Disgnent | Ulcerative Colitis | GAL3ST2      |
| Disgnent | Ulcerative Colitis | TMBIM1       |
| Disgnent | Ulcerative Colitis | IFIH1        |
| Disgnent | Ulcerative Colitis | ERAP2        |
| Disgnent | Ulcerative Colitis | TRAF3IP2-AS1 |
| Disgnent | Ulcerative Colitis | LINC00598    |
| Disgnent | Ulcerative Colitis | SLC22A4      |
| Disgnent | Ulcerative Colitis | STK11        |
| Disgnent | Ulcerative Colitis | SUOX         |
| Disgnent | Ulcerative Colitis | TGFB1        |
| Disgnent | Ulcerative Colitis | TLR2         |
| Disgnent | Ulcerative Colitis | TNXB         |
| Disgnent | Ulcerative Colitis | TP53         |
| Disgnent | Ulcerative Colitis | INS-IGF2     |
| Disgnent | Ulcerative Colitis | VDR          |
| Disgnent | Ulcerative Colitis | MYRF         |
| Disgnent | Ulcerative Colitis | TMEM258      |
| Disgnent | Ulcerative Colitis | ANKRD55      |
| Disgnent | Ulcerative Colitis | MFSD13A      |
| Disgnent | Ulcerative Colitis | SEMA6D       |
| Disgnent | Ulcerative Colitis | CPEB4        |
| Disgnent | Ulcerative Colitis | NDFIP1       |
| Disgnent | Ulcerative Colitis | DUSP16       |
| Disgnent | Ulcerative Colitis | CAMK2A       |
| Disgnent | Ulcerative Colitis | TSPAN14      |
| Disgnent | Ulcerative Colitis | GATD3A       |
| Disgnent | Ulcerative Colitis | MAML2        |
| Disgnent | Ulcerative Colitis | ZGPAT        |
| Disgnent | Ulcerative Colitis | NKD1         |
| Disgnent | Ulcerative Colitis | KSR1         |
| Disgnent | Ulcerative Colitis | ASAP2        |
| Disgnent | Ulcerative Colitis | NR1I2        |
| Disgnent | Ulcerative Colitis | SKAP2        |
| Disgnent | Ulcerative Colitis | TRIM15       |
| Disgnent | Ulcerative Colitis | IL33         |
| Disgnent | Ulcerative Colitis | ANKRD30A     |
| Disgnent | Ulcerative Colitis | FIBP         |
| Disgnent | Ulcerative Colitis | OSMR         |
| Disgnent | Ulcerative Colitis | ZNF300       |
| Disgnent | Ulcerative Colitis | CD6          |
| Disgnent | Ulcerative Colitis | CYTH1        |

|          |                    |         |
|----------|--------------------|---------|
| Disgnent | Ulcerative Colitis | CD14    |
| Disgnent | Ulcerative Colitis | ATG5    |
| Disgnent | Ulcerative Colitis | LITAF   |
| Disgnent | Ulcerative Colitis | NPEPPS  |
| Disgnent | Ulcerative Colitis | SETD1A  |
| Disgnent | Ulcerative Colitis | KEAP1   |
| Disgnent | Ulcerative Colitis | MICA    |
| Disgnent | Ulcerative Colitis | IL37    |
| Disgnent | Ulcerative Colitis | IL18    |
| Disgnent | Ulcerative Colitis | MBL2    |
| Disgnent | Ulcerative Colitis | MLH1    |
| Disgnent | Ulcerative Colitis | MAPK1   |
| Disgnent | Ulcerative Colitis | IL21    |
| Disgnent | Ulcerative Colitis | BCL2    |
| Disgnent | Ulcerative Colitis | CCL11   |
| Disgnent | Ulcerative Colitis | MIR21   |
| Disgnent | Ulcerative Colitis | MIR31   |
| Disgnent | Ulcerative Colitis | MYO9B   |
| Disgnent | Ulcerative Colitis | MYDGF   |
| Disgnent | Ulcerative Colitis | DLG5    |
| Disgnent | Ulcerative Colitis | ESR1    |
| Disgnent | Ulcerative Colitis | IBD2    |
| Disgnent | Ulcerative Colitis | JAK1    |
| Disgnent | Ulcerative Colitis | LCN2    |
| Disgnent | Ulcerative Colitis | MIR155  |
| Disgnent | Ulcerative Colitis | MYD88   |
| Disgnent | Ulcerative Colitis | IL17D   |
| Disgnent | Ulcerative Colitis | TLR9    |
| Disgnent | Ulcerative Colitis | RUNX3   |
| Disgnent | Ulcerative Colitis | GALM    |
| Disgnent | Ulcerative Colitis | CTNNB1  |
| Disgnent | Ulcerative Colitis | GSTM1   |
| Disgnent | Ulcerative Colitis | IBD3    |
| Disgnent | Ulcerative Colitis | APC     |
| Disgnent | Ulcerative Colitis | IL5     |
| Disgnent | Ulcerative Colitis | MIF     |
| Disgnent | Ulcerative Colitis | MSH2    |
| Disgnent | Ulcerative Colitis | MTHFR   |
| Disgnent | Ulcerative Colitis | S100A9  |
| Disgnent | Ulcerative Colitis | GORASP1 |
| Disgnent | Ulcerative Colitis | WNK1    |
| Disgnent | Ulcerative Colitis | BPI     |
| Disgnent | Ulcerative Colitis | STAT6   |
| Disgnent | Ulcerative Colitis | SYT1    |

|          |                    |             |
|----------|--------------------|-------------|
| Disgnent | Ulcerative Colitis | TLR5        |
| Disgnent | Ulcerative Colitis | TPMT        |
| Disgnent | Ulcerative Colitis | VIP         |
| Disgnent | Ulcerative Colitis | EBI3        |
| Disgnent | Ulcerative Colitis | CDKN1A      |
| Disgnent | Ulcerative Colitis | NOD1        |
| Disgnent | Ulcerative Colitis | CCR5        |
| Disgnent | Ulcerative Colitis | CLDN7       |
| Disgnent | Ulcerative Colitis | EGFR        |
| Disgnent | Ulcerative Colitis | AKT1        |
| Disgnent | Ulcerative Colitis | HPGDS       |
| Disgnent | Ulcerative Colitis | HMOX1       |
| Disgnent | Ulcerative Colitis | IL7         |
| Disgnent | Ulcerative Colitis | ISG20       |
| Disgnent | Ulcerative Colitis | KRAS        |
| Disgnent | Ulcerative Colitis | LTA         |
| Disgnent | Ulcerative Colitis | MIR146A     |
| Disgnent | Ulcerative Colitis | MEFV        |
| Disgnent | Ulcerative Colitis | MMP7        |
| Disgnent | Ulcerative Colitis | SOD1        |
| Disgnent | Ulcerative Colitis | SPP1        |
| Disgnent | Ulcerative Colitis | TAC1        |
| Disgnent | Ulcerative Colitis | TRBV20OR9-2 |
| Disgnent | Ulcerative Colitis | TFF3        |
| Disgnent | Ulcerative Colitis | VEGFA       |
| Disgnent | Ulcerative Colitis | XBP1        |
| Disgnent | Ulcerative Colitis | MADCAM1     |
| Disgnent | Ulcerative Colitis | TSLP        |
| Disgnent | Ulcerative Colitis | CLDN2       |
| Disgnent | Ulcerative Colitis | CLDN1       |
| Disgnent | Ulcerative Colitis | CD80        |
| Disgnent | Ulcerative Colitis | NAT2        |
| Disgnent | Ulcerative Colitis | OCLN        |
| Disgnent | Ulcerative Colitis | RABEPK      |
| Disgnent | Ulcerative Colitis | LANCL1      |
| Disgnent | Ulcerative Colitis | CCR9        |
| Disgnent | Ulcerative Colitis | EBNA1BP2    |
| Disgnent | Ulcerative Colitis | LINC02605   |
| Disgnent | Ulcerative Colitis | H3P28       |
| Disgnent | Ulcerative Colitis | MTFMT       |
| Disgnent | Ulcerative Colitis | CCN2        |
| Disgnent | Ulcerative Colitis | CYP3A5      |
| Disgnent | Ulcerative Colitis | CYP27B1     |
| Disgnent | Ulcerative Colitis | DMBT1       |

|          |                    |                 |
|----------|--------------------|-----------------|
| Disgnent | Ulcerative Colitis | F5              |
| Disgnent | Ulcerative Colitis | FGF7            |
| Disgnent | Ulcerative Colitis | CABIN1          |
| Disgnent | Ulcerative Colitis | GATA3           |
| Disgnent | Ulcerative Colitis | GP2             |
| Disgnent | Ulcerative Colitis | NR3C1           |
| Disgnent | Ulcerative Colitis | GSTP1           |
| Disgnent | Ulcerative Colitis | GSTT1           |
| Disgnent | Ulcerative Colitis | ARMH1           |
| Disgnent | Ulcerative Colitis | RPSA            |
| Disgnent | Ulcerative Colitis | LEP             |
| Disgnent | Ulcerative Colitis | LGALS3          |
| Disgnent | Ulcerative Colitis | MGMT            |
| Disgnent | Ulcerative Colitis | MMP10           |
| Disgnent | Ulcerative Colitis | NFKBIA          |
| Disgnent | Ulcerative Colitis | NFKBIL1         |
| Disgnent | Ulcerative Colitis | PI3             |
| Disgnent | Ulcerative Colitis | PLA2G1B         |
| Disgnent | Ulcerative Colitis | BTNL2           |
| Disgnent | Ulcerative Colitis | PRTN3           |
| Disgnent | Ulcerative Colitis | PSMD7           |
| Disgnent | Ulcerative Colitis | CCL2            |
| Disgnent | Ulcerative Colitis | CXCL5           |
| Disgnent | Ulcerative Colitis | CXCL12          |
| Disgnent | Ulcerative Colitis | SLC22A5         |
| Disgnent | Ulcerative Colitis | STAT1           |
| Disgnent | Ulcerative Colitis | HSP90B1         |
| Disgnent | Ulcerative Colitis | TRPV1           |
| Disgnent | Ulcerative Colitis | CA2             |
| Disgnent | Ulcerative Colitis | REG4            |
| Disgnent | Ulcerative Colitis | TP63            |
| Disgnent | Ulcerative Colitis | SOCS1           |
| Disgnent | Ulcerative Colitis | SOCS3           |
| Disgnent | Ulcerative Colitis | ARHGEF2         |
| Disgnent | Ulcerative Colitis | CDKN2B-AS1      |
| Disgnent | Ulcerative Colitis | CD24            |
| Disgnent | Ulcerative Colitis | DEFB4B          |
| Disgnent | Ulcerative Colitis | CCL26           |
| Disgnent | Ulcerative Colitis | CEACAM5         |
| Disgnent | Ulcerative Colitis | LINC02210-CRHR1 |
| Disgnent | Ulcerative Colitis | AHSA1           |
| Disgnent | Ulcerative Colitis | CXCR6           |
| Disgnent | Ulcerative Colitis | TRAF3IP2        |
| Disgnent | Ulcerative Colitis | IL24            |



|          |                    |          |
|----------|--------------------|----------|
| Disgnent | Ulcerative Colitis | IRAK3    |
| Disgnent | Ulcerative Colitis | H3P10    |
| Disgnent | Ulcerative Colitis | SLCO6A1  |
| Disgnent | Ulcerative Colitis | CREBBP   |
| Disgnent | Ulcerative Colitis | CRHR1    |
| Disgnent | Ulcerative Colitis | CRK      |
| Disgnent | Ulcerative Colitis | ADORA3   |
| Disgnent | Ulcerative Colitis | MAPK14   |
| Disgnent | Ulcerative Colitis | LACC1    |
| Disgnent | Ulcerative Colitis | CTF1     |
| Disgnent | Ulcerative Colitis | CX3CR1   |
| Disgnent | Ulcerative Colitis | DCC      |
| Disgnent | Ulcerative Colitis | ACE      |
| Disgnent | Ulcerative Colitis | DEFB4A   |
| Disgnent | Ulcerative Colitis | ATN1     |
| Disgnent | Ulcerative Colitis | S1PR1    |
| Disgnent | Ulcerative Colitis | F2RL1    |
| Disgnent | Ulcerative Colitis | FCGR3A   |
| Disgnent | Ulcerative Colitis | FHIT     |
| Disgnent | Ulcerative Colitis | RNF19A   |
| Disgnent | Ulcerative Colitis | POLDIP2  |
| Disgnent | Ulcerative Colitis | SGSM3    |
| Disgnent | Ulcerative Colitis | BIN1     |
| Disgnent | Ulcerative Colitis | CXCR3    |
| Disgnent | Ulcerative Colitis | H2AX     |
| Disgnent | Ulcerative Colitis | HGF      |
| Disgnent | Ulcerative Colitis | HIF1A    |
| Disgnent | Ulcerative Colitis | HLA-DQB1 |
| Disgnent | Ulcerative Colitis | HLA-DRB3 |
| Disgnent | Ulcerative Colitis | HRAS     |
| Disgnent | Ulcerative Colitis | AQP8     |
| Disgnent | Ulcerative Colitis | IL4R     |
| Disgnent | Ulcerative Colitis | IL15     |
| Disgnent | Ulcerative Colitis | CXCL10   |
| Disgnent | Ulcerative Colitis | ITGB1    |
| Disgnent | Ulcerative Colitis | GSTK1    |
| Disgnent | Ulcerative Colitis | LAMC2    |
| Disgnent | Ulcerative Colitis | LYZ      |
| Disgnent | Ulcerative Colitis | MIR126   |
| Disgnent | Ulcerative Colitis | MIR196A2 |
| Disgnent | Ulcerative Colitis | MICB     |
| Disgnent | Ulcerative Colitis | MIP      |
| Disgnent | Ulcerative Colitis | MUC1     |
| Disgnent | Ulcerative Colitis | PAEP     |

|          |                    |             |
|----------|--------------------|-------------|
| Disgnent | Ulcerative Colitis | IBD6        |
| Disgnent | Ulcerative Colitis | GDE1        |
| Disgnent | Ulcerative Colitis | ACP1        |
| Disgnent | Ulcerative Colitis | SERPINA1    |
| Disgnent | Ulcerative Colitis | PLA2G2A     |
| Disgnent | Ulcerative Colitis | TREM1       |
| Disgnent | Ulcerative Colitis | PON1        |
| Disgnent | Ulcerative Colitis | KRT20       |
| Disgnent | Ulcerative Colitis | RNF186      |
| Disgnent | Ulcerative Colitis | PPARA       |
| Disgnent | Ulcerative Colitis | MAP2K7      |
| Disgnent | Ulcerative Colitis | PTGDS       |
| Disgnent | Ulcerative Colitis | PTGER4      |
| Disgnent | Ulcerative Colitis | MIR499A     |
| Disgnent | Ulcerative Colitis | PTPN11      |
| Disgnent | Ulcerative Colitis | HAMP        |
| Disgnent | Ulcerative Colitis | S100B       |
| Disgnent | Ulcerative Colitis | CCL25       |
| Disgnent | Ulcerative Colitis | CX3CL1      |
| Disgnent | Ulcerative Colitis | SDC1        |
| Disgnent | Ulcerative Colitis | SELL        |
| Disgnent | Ulcerative Colitis | SFTPD       |
| Disgnent | Ulcerative Colitis | CLEC7A      |
| Disgnent | Ulcerative Colitis | SLC6A4      |
| Disgnent | Ulcerative Colitis | ST2         |
| Disgnent | Ulcerative Colitis | TACR1       |
| Disgnent | Ulcerative Colitis | TIMP1       |
| Disgnent | Ulcerative Colitis | TLR3        |
| Disgnent | Ulcerative Colitis | TNFRSF1B    |
| Disgnent | Ulcerative Colitis | CXCR4       |
| Disgnent | Ulcerative Colitis | SLC25A20    |
| Disgnent | Ulcerative Colitis | AIMP2       |
| Disgnent | Ulcerative Colitis | CDR3        |
| Disgnent | Ulcerative Colitis | CAMP        |
| Disgnent | Ulcerative Colitis | CASP1       |
| Disgnent | Ulcerative Colitis | NLRP12      |
| Disgnent | Ulcerative Colitis | IL1RL1      |
| Disgnent | Ulcerative Colitis | CD163       |
| Disgnent | Ulcerative Colitis | GRAP2       |
| Disgnent | Ulcerative Colitis | ABCG2       |
| Disgnent | Ulcerative Colitis | CD44        |
| Disgnent | Ulcerative Colitis | CD68        |
| Disgnent | Ulcerative Colitis | MAGI2       |
| Disgnent | Ulcerative Colitis | KLRC4-KLRK1 |

|          |                    |             |
|----------|--------------------|-------------|
| Disgnent | Ulcerative Colitis | RAB4B-EGLN2 |
| Disgnent | Ulcerative Colitis | ABCB6       |
| Disgnent | Ulcerative Colitis | PSC         |
| Disgnent | Ulcerative Colitis | CDH11       |
| Disgnent | Ulcerative Colitis | IFITM3      |
| Disgnent | Ulcerative Colitis | CDX2        |
| Disgnent | Ulcerative Colitis | NXF1        |
| Disgnent | Ulcerative Colitis | TNFSF13B    |
| Disgnent | Ulcerative Colitis | CORIN       |
| Disgnent | Ulcerative Colitis | RIPK3       |
| Disgnent | Ulcerative Colitis | CD160       |
| Disgnent | Ulcerative Colitis | CHGA        |
| Disgnent | Ulcerative Colitis | CHI3L1      |
| Disgnent | Ulcerative Colitis | RASSF1      |
| Disgnent | Ulcerative Colitis | EGLN2       |
| Disgnent | Ulcerative Colitis | SLC6A14     |
| Disgnent | Ulcerative Colitis | CISH        |
| Disgnent | Ulcerative Colitis | LRG1        |
| Disgnent | Ulcerative Colitis | TAGAP       |
| Disgnent | Ulcerative Colitis | COL2A1      |
| Disgnent | Ulcerative Colitis | ADM         |
| Disgnent | Ulcerative Colitis | ADORA2A     |
| Disgnent | Ulcerative Colitis | CRH         |
| Disgnent | Ulcerative Colitis | DOCK11      |
| Disgnent | Ulcerative Colitis | MUC17       |
| Disgnent | Ulcerative Colitis | HT          |
| Disgnent | Ulcerative Colitis | CDAN1       |
| Disgnent | Ulcerative Colitis | PLB1        |
| Disgnent | Ulcerative Colitis | CYP2B6      |
| Disgnent | Ulcerative Colitis | CYP2C19     |
| Disgnent | Ulcerative Colitis | DEFB1       |
| Disgnent | Ulcerative Colitis | NQO1        |
| Disgnent | Ulcerative Colitis | AFM         |
| Disgnent | Ulcerative Colitis | AGA         |
| Disgnent | Ulcerative Colitis | AGER        |
| Disgnent | Ulcerative Colitis | EFNA5       |
| Disgnent | Ulcerative Colitis | MLKL        |
| Disgnent | Ulcerative Colitis | EIF4E       |
| Disgnent | Ulcerative Colitis | ELAVL2      |
| Disgnent | Ulcerative Colitis | ELF3        |
| Disgnent | Ulcerative Colitis | EPHB2       |
| Disgnent | Ulcerative Colitis | F2          |
| Disgnent | Ulcerative Colitis | FAAH        |
| Disgnent | Ulcerative Colitis | FCGR3B      |

|          |                    |           |
|----------|--------------------|-----------|
| Disgnent | Ulcerative Colitis | FGFR1     |
| Disgnent | Ulcerative Colitis | CARD8     |
| Disgnent | Ulcerative Colitis | KLRK1     |
| Disgnent | Ulcerative Colitis | FOXO3     |
| Disgnent | Ulcerative Colitis | MPRIIP    |
| Disgnent | Ulcerative Colitis | FLNB      |
| Disgnent | Ulcerative Colitis | FLT1      |
| Disgnent | Ulcerative Colitis | SIRT1     |
| Disgnent | Ulcerative Colitis | FOS       |
| Disgnent | Ulcerative Colitis | SEC14L2   |
| Disgnent | Ulcerative Colitis | SMUG1     |
| Disgnent | Ulcerative Colitis | LY96      |
| Disgnent | Ulcerative Colitis | PANX1     |
| Disgnent | Ulcerative Colitis | ALPI      |
| Disgnent | Ulcerative Colitis | GEM       |
| Disgnent | Ulcerative Colitis | NOX1      |
| Disgnent | Ulcerative Colitis | IL17B     |
| Disgnent | Ulcerative Colitis | GUCA2A    |
| Disgnent | Ulcerative Colitis | GUCA2B    |
| Disgnent | Ulcerative Colitis | GZMB      |
| Disgnent | Ulcerative Colitis | HLA-A     |
| Disgnent | Ulcerative Colitis | HLA-C     |
| Disgnent | Ulcerative Colitis | HLA-DPB1  |
| Disgnent | Ulcerative Colitis | HLA-G     |
| Disgnent | Ulcerative Colitis | NR4A1     |
| Disgnent | Ulcerative Colitis | APEX1     |
| Disgnent | Ulcerative Colitis | BIRC2     |
| Disgnent | Ulcerative Colitis | BIRC3     |
| Disgnent | Ulcerative Colitis | HSPA4     |
| Disgnent | Ulcerative Colitis | HSP90AA1  |
| Disgnent | Ulcerative Colitis | HSPD1     |
| Disgnent | Ulcerative Colitis | TNC       |
| Disgnent | Ulcerative Colitis | IDH1      |
| Disgnent | Ulcerative Colitis | APOE      |
| Disgnent | Ulcerative Colitis | LINC01193 |
| Disgnent | Ulcerative Colitis | IL11      |
| Disgnent | Ulcerative Colitis | IL16      |
| Disgnent | Ulcerative Colitis | IDO1      |
| Disgnent | Ulcerative Colitis | INSRR     |
| Disgnent | Ulcerative Colitis | IRAK1     |
| Disgnent | Ulcerative Colitis | ITGAE     |
| Disgnent | Ulcerative Colitis | ITGAV     |
| Disgnent | Ulcerative Colitis | KDR       |
| Disgnent | Ulcerative Colitis | KIR3DL1   |

|          |                    |           |
|----------|--------------------|-----------|
| Disgnent | Ulcerative Colitis | NPSR1     |
| Disgnent | Ulcerative Colitis | LEPR      |
| Disgnent | Ulcerative Colitis | LGALS4    |
| Disgnent | Ulcerative Colitis | LPL       |
| Disgnent | Ulcerative Colitis | MIR122    |
| Disgnent | Ulcerative Colitis | MIR143    |
| Disgnent | Ulcerative Colitis | MIR145    |
| Disgnent | Ulcerative Colitis | MIR19A    |
| Disgnent | Ulcerative Colitis | MIR206    |
| Disgnent | Ulcerative Colitis | MIR214    |
| Disgnent | Ulcerative Colitis | MIR215    |
| Disgnent | Ulcerative Colitis | MIR29A    |
| Disgnent | Ulcerative Colitis | SMAD7     |
| Disgnent | Ulcerative Colitis | DEFB103A  |
| Disgnent | Ulcerative Colitis | MDK       |
| Disgnent | Ulcerative Colitis | MDM2      |
| Disgnent | Ulcerative Colitis | MEP1A     |
| Disgnent | Ulcerative Colitis | MET       |
| Disgnent | Ulcerative Colitis | MLN       |
| Disgnent | Ulcerative Colitis | MMP2      |
| Disgnent | Ulcerative Colitis | MMP3      |
| Disgnent | Ulcerative Colitis | MIR196B   |
| Disgnent | Ulcerative Colitis | MST1R     |
| Disgnent | Ulcerative Colitis | COX1      |
| Disgnent | Ulcerative Colitis | MTRR      |
| Disgnent | Ulcerative Colitis | MUC3A     |
| Disgnent | Ulcerative Colitis | MUC4      |
| Disgnent | Ulcerative Colitis | MUC5AC    |
| Disgnent | Ulcerative Colitis | MXI1      |
| Disgnent | Ulcerative Colitis | MYOD1     |
| Disgnent | Ulcerative Colitis | WG        |
| Disgnent | Ulcerative Colitis | NOS3      |
| Disgnent | Ulcerative Colitis | SLC11A2   |
| Disgnent | Ulcerative Colitis | MIR375    |
| Disgnent | Ulcerative Colitis | ODC1      |
| Disgnent | Ulcerative Colitis | TNFRSF11B |
| Disgnent | Ulcerative Colitis | DUOX2     |
| Disgnent | Ulcerative Colitis | PAK1      |
| Disgnent | Ulcerative Colitis | IL20      |
| Disgnent | Ulcerative Colitis | CUZD1     |
| Disgnent | Ulcerative Colitis | HSPA14    |
| Disgnent | Ulcerative Colitis | CRNKL1    |
| Disgnent | Ulcerative Colitis | PECAM1    |
| Disgnent | Ulcerative Colitis | PIK3CA    |

|          |                    |          |
|----------|--------------------|----------|
| Disgnent | Ulcerative Colitis | PIK3CB   |
| Disgnent | Ulcerative Colitis | PIK3CD   |
| Disgnent | Ulcerative Colitis | PIK3CG   |
| Disgnent | Ulcerative Colitis | PKM      |
| Disgnent | Ulcerative Colitis | EIM      |
| Disgnent | Ulcerative Colitis | SLC52A1  |
| Disgnent | Ulcerative Colitis | PAG1     |
| Disgnent | Ulcerative Colitis | DEFB103B |
| Disgnent | Ulcerative Colitis | CYP26B1  |
| Disgnent | Ulcerative Colitis | PSD      |
| Disgnent | Ulcerative Colitis | B2M      |
| Disgnent | Ulcerative Colitis | MEPE     |
| Disgnent | Ulcerative Colitis | SLC12A9  |
| Disgnent | Ulcerative Colitis | PCBP4    |
| Disgnent | Ulcerative Colitis | MIR146B  |
| Disgnent | Ulcerative Colitis | MUC3B    |
| Disgnent | Ulcerative Colitis | PTPRS    |
| Disgnent | Ulcerative Colitis | RAC1     |
| Disgnent | Ulcerative Colitis | MOK      |
| Disgnent | Ulcerative Colitis | RAG2     |
| Disgnent | Ulcerative Colitis | CCND1    |
| Disgnent | Ulcerative Colitis | OPN1LW   |
| Disgnent | Ulcerative Colitis | REL      |
| Disgnent | Ulcerative Colitis | REG1A    |
| Disgnent | Ulcerative Colitis | S100A1   |
| Disgnent | Ulcerative Colitis | S100A8   |
| Disgnent | Ulcerative Colitis | CCL3     |
| Disgnent | Ulcerative Colitis | CCL5     |
| Disgnent | Ulcerative Colitis | CCL8     |
| Disgnent | Ulcerative Colitis | CCL21    |
| Disgnent | Ulcerative Colitis | CCL24    |
| Disgnent | Ulcerative Colitis | SFRP1    |
| Disgnent | Ulcerative Colitis | SFRP2    |
| Disgnent | Ulcerative Colitis | SLC9A3   |
| Disgnent | Ulcerative Colitis | SLC15A1  |
| Disgnent | Ulcerative Colitis | SLPI     |
| Disgnent | Ulcerative Colitis | SOAT1    |
| Disgnent | Ulcerative Colitis | SOD2     |
| Disgnent | Ulcerative Colitis | SOX2     |
| Disgnent | Ulcerative Colitis | STAT5A   |
| Disgnent | Ulcerative Colitis | TAP2     |
| Disgnent | Ulcerative Colitis | TCF7L2   |
| Disgnent | Ulcerative Colitis | TCN2     |
| Disgnent | Ulcerative Colitis | TERT     |

|          |                    |            |
|----------|--------------------|------------|
| Disgnent | Ulcerative Colitis | TGFBR2     |
| Disgnent | Ulcerative Colitis | TLR1       |
| Disgnent | Ulcerative Colitis | TNFAIP6    |
| Disgnent | Ulcerative Colitis | C4B        |
| Disgnent | Ulcerative Colitis | TXN        |
| Disgnent | Ulcerative Colitis | XRCC1      |
| Disgnent | Ulcerative Colitis | YWHAZ      |
| Disgnent | Ulcerative Colitis | CALCA      |
| Disgnent | Ulcerative Colitis | ZBP1       |
| Disgnent | Ulcerative Colitis | BCL2L12    |
| Disgnent | Ulcerative Colitis | PLA2G6     |
| Disgnent | Ulcerative Colitis | CASP9      |
| Disgnent | Ulcerative Colitis | CAT        |
| Disgnent | Ulcerative Colitis | HAVCR2     |
| Disgnent | Ulcerative Colitis | USO1       |
| Disgnent | Ulcerative Colitis | CBFA2T3    |
| Disgnent | Ulcerative Colitis | MBTPS1     |
| Disgnent | Ulcerative Colitis | EED        |
| Disgnent | Ulcerative Colitis | CBR1       |
| Disgnent | Ulcerative Colitis | RIPK1      |
| Disgnent | Ulcerative Colitis | CFLAR      |
| Disgnent | Ulcerative Colitis | PER3       |
| Disgnent | Ulcerative Colitis | NAT1       |
| Disgnent | Ulcerative Colitis | TCEAL1     |
| Disgnent | Ulcerative Colitis | CD86       |
| Disgnent | Ulcerative Colitis | CHST2      |
| Disgnent | Ulcerative Colitis | CD34       |
| Disgnent | Ulcerative Colitis | SEMA3E     |
| Disgnent | Ulcerative Colitis | ADA        |
| Disgnent | Ulcerative Colitis | IBD22      |
| Disgnent | Ulcerative Colitis | IBD24      |
| Disgnent | Ulcerative Colitis | IBD26      |
| Disgnent | Ulcerative Colitis | LINC00994  |
| Disgnent | Ulcerative Colitis | H3C9P      |
| Disgnent | Ulcerative Colitis | MIR4728    |
| Disgnent | Ulcerative Colitis | IL18BP     |
| Disgnent | Ulcerative Colitis | MUC12      |
| Disgnent | Ulcerative Colitis | HIF1A-AS2  |
| Disgnent | Ulcerative Colitis | APOBEC3A_B |
| Disgnent | Ulcerative Colitis | ACTR3      |
| Disgnent | Ulcerative Colitis | CDH13      |
| Disgnent | Ulcerative Colitis | NAMPT      |
| Disgnent | Ulcerative Colitis | PDZK1IP1   |
| Disgnent | Ulcerative Colitis | LPAR6      |

|          |                    |               |
|----------|--------------------|---------------|
| Disgnent | Ulcerative Colitis | TNK2          |
| Disgnent | Ulcerative Colitis | TRIM13        |
| Disgnent | Ulcerative Colitis | DDX39A        |
| Disgnent | Ulcerative Colitis | GDF11         |
| Disgnent | Ulcerative Colitis | POP7          |
| Disgnent | Ulcerative Colitis | CDK2AP2       |
| Disgnent | Ulcerative Colitis | LOC102723407  |
| Disgnent | Ulcerative Colitis | LOC102724197  |
| Disgnent | Ulcerative Colitis | CBSL          |
| Disgnent | Ulcerative Colitis | LOC102724971  |
| Disgnent | Ulcerative Colitis | STUB1         |
| Disgnent | Ulcerative Colitis | TPTEP2-CSNK1E |
| Disgnent | Ulcerative Colitis | TRAIP         |
| Disgnent | Ulcerative Colitis | CDKN2D        |
| Disgnent | Ulcerative Colitis | TLR6          |
| Disgnent | Ulcerative Colitis | KLF2          |
| Disgnent | Ulcerative Colitis | CITED2        |
| Disgnent | Ulcerative Colitis | TUBA1B        |
| Disgnent | Ulcerative Colitis | NDRG1         |
| Disgnent | Ulcerative Colitis | YAP1          |
| Disgnent | Ulcerative Colitis | PRMT5         |
| Disgnent | Ulcerative Colitis | CLEC10A       |
| Disgnent | Ulcerative Colitis | FBLN5         |
| Disgnent | Ulcerative Colitis | PERCC1        |
| Disgnent | Ulcerative Colitis | LOC105379528  |
| Disgnent | Ulcerative Colitis | SLC35A1       |
| Disgnent | Ulcerative Colitis | CXCL13        |
| Disgnent | Ulcerative Colitis | TXNIP         |
| Disgnent | Ulcerative Colitis | CST12P        |
| Disgnent | Ulcerative Colitis | KHDRBS1       |
| Disgnent | Ulcerative Colitis | PLK2          |
| Disgnent | Ulcerative Colitis | NEK6          |
| Disgnent | Ulcerative Colitis | LOC107987479  |
| Disgnent | Ulcerative Colitis | CFTR          |
| Disgnent | Ulcerative Colitis | CEACAM3       |
| Disgnent | Ulcerative Colitis | CCL27         |
| Disgnent | Ulcerative Colitis | CEACAM7       |
| Disgnent | Ulcerative Colitis | SUB1          |
| Disgnent | Ulcerative Colitis | PRDX3         |
| Disgnent | Ulcerative Colitis | MAPRE2        |
| Disgnent | Ulcerative Colitis | LILRB4        |
| Disgnent | Ulcerative Colitis | LOC110806262  |
| Disgnent | Ulcerative Colitis | ADAMTS13      |
| Disgnent | Ulcerative Colitis | RPP14         |



|          |                    |           |
|----------|--------------------|-----------|
| Disgnent | Ulcerative Colitis | CHEK1     |
| Disgnent | Ulcerative Colitis | BVES      |
| Disgnent | Ulcerative Colitis | FAM107A   |
| Disgnent | Ulcerative Colitis | WIF1      |
| Disgnent | Ulcerative Colitis | AKAP13    |
| Disgnent | Ulcerative Colitis | EGLN3     |
| Disgnent | Ulcerative Colitis | PADI2     |
| Disgnent | Ulcerative Colitis | CAVIN3    |
| Disgnent | Ulcerative Colitis | STK38     |
| Disgnent | Ulcerative Colitis | MGLL      |
| Disgnent | Ulcerative Colitis | AZIN2     |
| Disgnent | Ulcerative Colitis | CHRNA3    |
| Disgnent | Ulcerative Colitis | CYGB      |
| Disgnent | Ulcerative Colitis | MARCHF3   |
| Disgnent | Ulcerative Colitis | FCRL3     |
| Disgnent | Ulcerative Colitis | H3P13     |
| Disgnent | Ulcerative Colitis | H3P8      |
| Disgnent | Ulcerative Colitis | H3P40     |
| Disgnent | Ulcerative Colitis | EXOC3-AS1 |
| Disgnent | Ulcerative Colitis | CLCN2     |
| Disgnent | Ulcerative Colitis | CLU       |
| Disgnent | Ulcerative Colitis | PLIN2     |
| Disgnent | Ulcerative Colitis | CCR1      |
| Disgnent | Ulcerative Colitis | CCR3      |
| Disgnent | Ulcerative Colitis | CCR7      |
| Disgnent | Ulcerative Colitis | CMM       |
| Disgnent | Ulcerative Colitis | EARS2     |
| Disgnent | Ulcerative Colitis | SNX20     |
| Disgnent | Ulcerative Colitis | CNR1      |
| Disgnent | Ulcerative Colitis | COL6A1    |
| Disgnent | Ulcerative Colitis | SGPP2     |
| Disgnent | Ulcerative Colitis | MAP3K8    |
| Disgnent | Ulcerative Colitis | TAAR1     |
| Disgnent | Ulcerative Colitis | COX8A     |
| Disgnent | Ulcerative Colitis | CLDN4     |
| Disgnent | Ulcerative Colitis | CPOX      |
| Disgnent | Ulcerative Colitis | CRHR2     |
| Disgnent | Ulcerative Colitis | DEFB104A  |
| Disgnent | Ulcerative Colitis | CRX       |
| Disgnent | Ulcerative Colitis | CRYGD     |
| Disgnent | Ulcerative Colitis | CRYZ      |
| Disgnent | Ulcerative Colitis | CSF2      |
| Disgnent | Ulcerative Colitis | CSNK1E    |
| Disgnent | Ulcerative Colitis | VCAN      |

|          |                    |          |
|----------|--------------------|----------|
| Disgnent | Ulcerative Colitis | IL34     |
| Disgnent | Ulcerative Colitis | ADRA1A   |
| Disgnent | Ulcerative Colitis | CTBS     |
| Disgnent | Ulcerative Colitis | ADRA2A   |
| Disgnent | Ulcerative Colitis | YDJC     |
| Disgnent | Ulcerative Colitis | COMMD1   |
| Disgnent | Ulcerative Colitis | ADRA2B   |
| Disgnent | Ulcerative Colitis | GPBAR1   |
| Disgnent | Ulcerative Colitis | ASPRV1   |
| Disgnent | Ulcerative Colitis | CXADR    |
| Disgnent | Ulcerative Colitis | CYBA     |
| Disgnent | Ulcerative Colitis | MARVELD2 |
| Disgnent | Ulcerative Colitis | CYP2A6   |
| Disgnent | Ulcerative Colitis | CYP2C9   |
| Disgnent | Ulcerative Colitis | CYP2C18  |
| Disgnent | Ulcerative Colitis | CYP2D6   |
| Disgnent | Ulcerative Colitis | CYP2E1   |
| Disgnent | Ulcerative Colitis | CYP3A4   |
| Disgnent | Ulcerative Colitis | CBLL2    |
| Disgnent | Ulcerative Colitis | CD55     |
| Disgnent | Ulcerative Colitis | SLC5A8   |
| Disgnent | Ulcerative Colitis | DAO      |
| Disgnent | Ulcerative Colitis | DAPK1    |
| Disgnent | Ulcerative Colitis | TRPV3    |
| Disgnent | Ulcerative Colitis | DECR1    |
| Disgnent | Ulcerative Colitis | DNAJB1P1 |
| Disgnent | Ulcerative Colitis | DLD      |
| Disgnent | Ulcerative Colitis | DMD      |
| Disgnent | Ulcerative Colitis | DMRT1    |
| Disgnent | Ulcerative Colitis | DPEP1    |
| Disgnent | Ulcerative Colitis | DPP4     |
| Disgnent | Ulcerative Colitis | DSG2     |
| Disgnent | Ulcerative Colitis | AGT      |
| Disgnent | Ulcerative Colitis | DUSP1    |
| Disgnent | Ulcerative Colitis | GPR183   |
| Disgnent | Ulcerative Colitis | EDNRA    |
| Disgnent | Ulcerative Colitis | EGF      |
| Disgnent | Ulcerative Colitis | EGR1     |
| Disgnent | Ulcerative Colitis | PLBD2    |
| Disgnent | Ulcerative Colitis | AHSG     |
| Disgnent | Ulcerative Colitis | ELANE    |
| Disgnent | Ulcerative Colitis | NLRP7    |
| Disgnent | Ulcerative Colitis | APOBEC3A |
| Disgnent | Ulcerative Colitis | MUC20    |

|          |                    |         |
|----------|--------------------|---------|
| Disgnent | Ulcerative Colitis | ENG     |
| Disgnent | Ulcerative Colitis | ENO1    |
| Disgnent | Ulcerative Colitis | EPHX1   |
| Disgnent | Ulcerative Colitis | STX2    |
| Disgnent | Ulcerative Colitis | ERBB2   |
| Disgnent | Ulcerative Colitis | ESR2    |
| Disgnent | Ulcerative Colitis | F3      |
| Disgnent | Ulcerative Colitis | F9      |
| Disgnent | Ulcerative Colitis | F12     |
| Disgnent | Ulcerative Colitis | FABP2   |
| Disgnent | Ulcerative Colitis | PTK2B   |
| Disgnent | Ulcerative Colitis | FAP     |
| Disgnent | Ulcerative Colitis | USP12   |
| Disgnent | Ulcerative Colitis | FASN    |
| Disgnent | Ulcerative Colitis | FCAR    |
| Disgnent | Ulcerative Colitis | FCGR1A  |
| Disgnent | Ulcerative Colitis | FGF2    |
| Disgnent | Ulcerative Colitis | FHL2    |
| Disgnent | Ulcerative Colitis | FKBP5   |
| Disgnent | Ulcerative Colitis | BAHD1   |
| Disgnent | Ulcerative Colitis | ALDOB   |
| Disgnent | Ulcerative Colitis | MAPRE1  |
| Disgnent | Ulcerative Colitis | ATF6    |
| Disgnent | Ulcerative Colitis | ACSBG1  |
| Disgnent | Ulcerative Colitis | MLC1    |
| Disgnent | Ulcerative Colitis | FKBP15  |
| Disgnent | Ulcerative Colitis | NCAPD3  |
| Disgnent | Ulcerative Colitis | MACF1   |
| Disgnent | Ulcerative Colitis | ZNF281  |
| Disgnent | Ulcerative Colitis | PADI4   |
| Disgnent | Ulcerative Colitis | FPR2    |
| Disgnent | Ulcerative Colitis | CCNDBP1 |
| Disgnent | Ulcerative Colitis | AMACR   |
| Disgnent | Ulcerative Colitis | NUP62   |
| Disgnent | Ulcerative Colitis | ALPP    |
| Disgnent | Ulcerative Colitis | FUT3    |
| Disgnent | Ulcerative Colitis | FUT4    |
| Disgnent | Ulcerative Colitis | TCERG1L |
| Disgnent | Ulcerative Colitis | DNAJB5  |
| Disgnent | Ulcerative Colitis | PART1   |
| Disgnent | Ulcerative Colitis | TRIM58  |
| Disgnent | Ulcerative Colitis | CHMP2B  |
| Disgnent | Ulcerative Colitis | AOC1    |
| Disgnent | Ulcerative Colitis | RIBC2   |

|          |                    |             |
|----------|--------------------|-------------|
| Disgnent | Ulcerative Colitis | BMP6P1      |
| Disgnent | Ulcerative Colitis | RNU1-1      |
| Disgnent | Ulcerative Colitis | GH1         |
| Disgnent | Ulcerative Colitis | GHR         |
| Disgnent | Ulcerative Colitis | GHSR        |
| Disgnent | Ulcerative Colitis | NSG1        |
| Disgnent | Ulcerative Colitis | B3GAT1      |
| Disgnent | Ulcerative Colitis | BBC3        |
| Disgnent | Ulcerative Colitis | CPAMD8      |
| Disgnent | Ulcerative Colitis | NAAA        |
| Disgnent | Ulcerative Colitis | IL17C       |
| Disgnent | Ulcerative Colitis | GLB1        |
| Disgnent | Ulcerative Colitis | PDCD4       |
| Disgnent | Ulcerative Colitis | RABGEF1     |
| Disgnent | Ulcerative Colitis | STK39       |
| Disgnent | Ulcerative Colitis | GLI1        |
| Disgnent | Ulcerative Colitis | AMY1A       |
| Disgnent | Ulcerative Colitis | AMY1B       |
| Disgnent | Ulcerative Colitis | GNAO1       |
| Disgnent | Ulcerative Colitis | AMY1C       |
| Disgnent | Ulcerative Colitis | GNG11       |
| Disgnent | Ulcerative Colitis | IGHV3OR16-7 |
| Disgnent | Ulcerative Colitis | H19         |
| Disgnent | Ulcerative Colitis | CCDC88B     |
| Disgnent | Ulcerative Colitis | OR10A4      |
| Disgnent | Ulcerative Colitis | GPR12       |
| Disgnent | Ulcerative Colitis | GPR15       |
| Disgnent | Ulcerative Colitis | IGHV3-69-1  |
| Disgnent | Ulcerative Colitis | IGHD3-10    |
| Disgnent | Ulcerative Colitis | IGHD3-9     |
| Disgnent | Ulcerative Colitis | GPER1       |
| Disgnent | Ulcerative Colitis | GPR42       |
| Disgnent | Ulcerative Colitis | FFAR2       |
| Disgnent | Ulcerative Colitis | MKNK2       |
| Disgnent | Ulcerative Colitis | GPX1        |
| Disgnent | Ulcerative Colitis | GPX2        |
| Disgnent | Ulcerative Colitis | LAMTOR2     |
| Disgnent | Ulcerative Colitis | DBNL        |
| Disgnent | Ulcerative Colitis | CLEC2D      |
| Disgnent | Ulcerative Colitis | CD274       |
| Disgnent | Ulcerative Colitis | CXCL1       |
| Disgnent | Ulcerative Colitis | CXCL2       |
| Disgnent | Ulcerative Colitis | MSH6        |
| Disgnent | Ulcerative Colitis | GTF2H1      |

|          |                    |          |
|----------|--------------------|----------|
| Disgnent | Ulcerative Colitis | GUCY2C   |
| Disgnent | Ulcerative Colitis | RMC1     |
| Disgnent | Ulcerative Colitis | MDFIC    |
| Disgnent | Ulcerative Colitis | TBX21    |
| Disgnent | Ulcerative Colitis | GZMA     |
| Disgnent | Ulcerative Colitis | GZMM     |
| Disgnent | Ulcerative Colitis | H1-0     |
| Disgnent | Ulcerative Colitis | SLC40A1  |
| Disgnent | Ulcerative Colitis | ANXA1    |
| Disgnent | Ulcerative Colitis | ANXA2    |
| Disgnent | Ulcerative Colitis | HCRT     |
| Disgnent | Ulcerative Colitis | HCRTR1   |
| Disgnent | Ulcerative Colitis | HDAC1    |
| Disgnent | Ulcerative Colitis | CD209    |
| Disgnent | Ulcerative Colitis | HIC1     |
| Disgnent | Ulcerative Colitis | ACACA    |
| Disgnent | Ulcerative Colitis | HLA-DOA  |
| Disgnent | Ulcerative Colitis | HLA-DPA1 |
| Disgnent | Ulcerative Colitis | HLA-DQB2 |
| Disgnent | Ulcerative Colitis | HLA-DRB4 |
| Disgnent | Ulcerative Colitis | MR1      |
| Disgnent | Ulcerative Colitis | HMGB1    |
| Disgnent | Ulcerative Colitis | HNF4G    |
| Disgnent | Ulcerative Colitis | HNMT     |
| Disgnent | Ulcerative Colitis | CELIAC2  |
| Disgnent | Ulcerative Colitis | APBA1    |
| Disgnent | Ulcerative Colitis | HP       |
| Disgnent | Ulcerative Colitis | HPGD     |
| Disgnent | Ulcerative Colitis | AGFG1    |
| Disgnent | Ulcerative Colitis | HES1     |
| Disgnent | Ulcerative Colitis | HSD11B2  |
| Disgnent | Ulcerative Colitis | HSF2     |
| Disgnent | Ulcerative Colitis | HSPA1A   |
| Disgnent | Ulcerative Colitis | HSPA1B   |
| Disgnent | Ulcerative Colitis | HSPA2    |
| Disgnent | Ulcerative Colitis | DNAJB1   |
| Disgnent | Ulcerative Colitis | HTR3A    |
| Disgnent | Ulcerative Colitis | HTR7     |
| Disgnent | Ulcerative Colitis | APOA4    |
| Disgnent | Ulcerative Colitis | IAPP     |
| Disgnent | Ulcerative Colitis | ICAM2    |
| Disgnent | Ulcerative Colitis | BRINP3   |
| Disgnent | Ulcerative Colitis | GADL1    |
| Disgnent | Ulcerative Colitis | IDUA     |

|          |                    |         |
|----------|--------------------|---------|
| Disgnent | Ulcerative Colitis | IFNA1   |
| Disgnent | Ulcerative Colitis | IFNA13  |
| Disgnent | Ulcerative Colitis | IFNGR1  |
| Disgnent | Ulcerative Colitis | IGF1    |
| Disgnent | Ulcerative Colitis | IGF1R   |
| Disgnent | Ulcerative Colitis | IGF2    |
| Disgnent | Ulcerative Colitis | IGHA1   |
| Disgnent | Ulcerative Colitis | APOH    |
| Disgnent | Ulcerative Colitis | IGHG3   |
| Disgnent | Ulcerative Colitis | IGLL2P  |
| Disgnent | Ulcerative Colitis | IL6ST   |
| Disgnent | Ulcerative Colitis | IL13RA2 |
| Disgnent | Ulcerative Colitis | IL15RA  |
| Disgnent | Ulcerative Colitis | TNFRSF9 |
| Disgnent | Ulcerative Colitis | ILK     |
| Disgnent | Ulcerative Colitis | ING1    |
| Disgnent | Ulcerative Colitis | INPP5D  |
| Disgnent | Ulcerative Colitis | INSR    |
| Disgnent | Ulcerative Colitis | IRAK2   |
| Disgnent | Ulcerative Colitis | IRF1    |
| Disgnent | Ulcerative Colitis | IRF4    |
| Disgnent | Ulcerative Colitis | ITGAM   |
| Disgnent | Ulcerative Colitis | ITGAX   |
| Disgnent | Ulcerative Colitis | ITPA    |
| Disgnent | Ulcerative Colitis | JAK3    |
| Disgnent | Ulcerative Colitis | JUNB    |
| Disgnent | Ulcerative Colitis | AREG    |
| Disgnent | Ulcerative Colitis | NDUFS7  |
| Disgnent | Ulcerative Colitis | KCNMA1  |
| Disgnent | Ulcerative Colitis | KCNN1   |
| Disgnent | Ulcerative Colitis | KCNQ2   |
| Disgnent | Ulcerative Colitis | KIR2DL1 |
| Disgnent | Ulcerative Colitis | KIR2DL2 |
| Disgnent | Ulcerative Colitis | KIR2DS3 |
| Disgnent | Ulcerative Colitis | KIR2DS4 |
| Disgnent | Ulcerative Colitis | KLK1    |
| Disgnent | Ulcerative Colitis | KNG1    |
| Disgnent | Ulcerative Colitis | ARG1    |
| Disgnent | Ulcerative Colitis | KRT1    |
| Disgnent | Ulcerative Colitis | KRT7    |
| Disgnent | Ulcerative Colitis | KRT8    |
| Disgnent | Ulcerative Colitis | RTL1    |
| Disgnent | Ulcerative Colitis | CCL4L1  |
| Disgnent | Ulcerative Colitis | ACAT2   |

|          |                    |           |
|----------|--------------------|-----------|
| Disgnent | Ulcerative Colitis | LAIR1     |
| Disgnent | Ulcerative Colitis | LOC390714 |
| Disgnent | Ulcerative Colitis | STMN1     |
| Disgnent | Ulcerative Colitis | LCT       |
| Disgnent | Ulcerative Colitis | LGALS1    |
| Disgnent | Ulcerative Colitis | LGALS3BP  |
| Disgnent | Ulcerative Colitis | ARHGDI1   |
| Disgnent | Ulcerative Colitis | LGALS9    |
| Disgnent | Ulcerative Colitis | LRP6      |
| Disgnent | Ulcerative Colitis | LRP5      |
| Disgnent | Ulcerative Colitis | LSAMP     |
| Disgnent | Ulcerative Colitis | CYP4F3    |
| Disgnent | Ulcerative Colitis | DUOXA2    |
| Disgnent | Ulcerative Colitis | LYN       |
| Disgnent | Ulcerative Colitis | MIR106A   |
| Disgnent | Ulcerative Colitis | MIR137    |
| Disgnent | Ulcerative Colitis | MIR141    |
| Disgnent | Ulcerative Colitis | MIR142    |
| Disgnent | Ulcerative Colitis | MIR150    |
| Disgnent | Ulcerative Colitis | MIR184    |
| Disgnent | Ulcerative Colitis | MIR192    |
| Disgnent | Ulcerative Colitis | MIR193A   |
| Disgnent | Ulcerative Colitis | MIR195    |
| Disgnent | Ulcerative Colitis | MIR200B   |
| Disgnent | Ulcerative Colitis | MIR200C   |
| Disgnent | Ulcerative Colitis | ARR3      |
| Disgnent | Ulcerative Colitis | MIR223    |
| Disgnent | Ulcerative Colitis | MIR26B    |
| Disgnent | Ulcerative Colitis | MIR34B    |
| Disgnent | Ulcerative Colitis | MIR34C    |
| Disgnent | Ulcerative Colitis | MAD2L1    |
| Disgnent | Ulcerative Colitis | SMAD2     |
| Disgnent | Ulcerative Colitis | SMAD4     |
| Disgnent | Ulcerative Colitis | ARRB2     |
| Disgnent | Ulcerative Colitis | MAF       |
| Disgnent | Ulcerative Colitis | MAFD1     |
| Disgnent | Ulcerative Colitis | MAP6      |
| Disgnent | Ulcerative Colitis | HCG23     |
| Disgnent | Ulcerative Colitis | MAZ       |
| Disgnent | Ulcerative Colitis | MCL1      |
| Disgnent | Ulcerative Colitis | ME1       |
| Disgnent | Ulcerative Colitis | MGAT5     |
| Disgnent | Ulcerative Colitis | CD99      |
| Disgnent | Ulcerative Colitis | ACHE      |

|          |                    |          |
|----------|--------------------|----------|
| Disgnent | Ulcerative Colitis | MME      |
| Disgnent | Ulcerative Colitis | MMP12    |
| Disgnent | Ulcerative Colitis | MMP13    |
| Disgnent | Ulcerative Colitis | MMP14    |
| Disgnent | Ulcerative Colitis | MNAT1    |
| Disgnent | Ulcerative Colitis | MPG      |
| Disgnent | Ulcerative Colitis | ASMT     |
| Disgnent | Ulcerative Colitis | CALHM6   |
| Disgnent | Ulcerative Colitis | XRCC6P5  |
| Disgnent | Ulcerative Colitis | MIR372   |
| Disgnent | Ulcerative Colitis | MSH3     |
| Disgnent | Ulcerative Colitis | MSI1     |
| Disgnent | Ulcerative Colitis | MT1A     |
| Disgnent | Ulcerative Colitis | CYTB     |
| Disgnent | Ulcerative Colitis | NUDT1    |
| Disgnent | Ulcerative Colitis | ND4      |
| Disgnent | Ulcerative Colitis | MTR      |
| Disgnent | Ulcerative Colitis | MUC6     |
| Disgnent | Ulcerative Colitis | MUTYH    |
| Disgnent | Ulcerative Colitis | MYC      |
| Disgnent | Ulcerative Colitis | MYCN     |
| Disgnent | Ulcerative Colitis | ATF3     |
| Disgnent | Ulcerative Colitis | ATF4     |
| Disgnent | Ulcerative Colitis | CEACAM6  |
| Disgnent | Ulcerative Colitis | NEDD9    |
| Disgnent | Ulcerative Colitis | ATOH1    |
| Disgnent | Ulcerative Colitis | NELL1    |
| Disgnent | Ulcerative Colitis | NEU1     |
| Disgnent | Ulcerative Colitis | NFATC2   |
| Disgnent | Ulcerative Colitis | NGF      |
| Disgnent | Ulcerative Colitis | NPR1     |
| Disgnent | Ulcerative Colitis | NT5E     |
| Disgnent | Ulcerative Colitis | NTF3     |
| Disgnent | Ulcerative Colitis | NTRK1    |
| Disgnent | Ulcerative Colitis | RBMXL1   |
| Disgnent | Ulcerative Colitis | MIR422A  |
| Disgnent | Ulcerative Colitis | OGG1     |
| Disgnent | Ulcerative Colitis | ORM2     |
| Disgnent | Ulcerative Colitis | P4HB     |
| Disgnent | Ulcerative Colitis | DEFB104B |
| Disgnent | Ulcerative Colitis | RRM2B    |
| Disgnent | Ulcerative Colitis | CD207    |
| Disgnent | Ulcerative Colitis | PRDX1    |
| Disgnent | Ulcerative Colitis | SERPINE1 |



|          |                    |          |
|----------|--------------------|----------|
| Disgnent | Ulcerative Colitis | PRKN     |
| Disgnent | Ulcerative Colitis | F11R     |
| Disgnent | Ulcerative Colitis | CLEC4A   |
| Disgnent | Ulcerative Colitis | ASCC1    |
| Disgnent | Ulcerative Colitis | DERL2    |
| Disgnent | Ulcerative Colitis | PCNA     |
| Disgnent | Ulcerative Colitis | ANGPTL4  |
| Disgnent | Ulcerative Colitis | DCTN4    |
| Disgnent | Ulcerative Colitis | AADAT    |
| Disgnent | Ulcerative Colitis | CLDN18   |
| Disgnent | Ulcerative Colitis | NT5C3A   |
| Disgnent | Ulcerative Colitis | TLR7     |
| Disgnent | Ulcerative Colitis | TLR8     |
| Disgnent | Ulcerative Colitis | PDCD1    |
| Disgnent | Ulcerative Colitis | CHST15   |
| Disgnent | Ulcerative Colitis | POP5     |
| Disgnent | Ulcerative Colitis | TRPV2    |
| Disgnent | Ulcerative Colitis | PDE4A    |
| Disgnent | Ulcerative Colitis | MAGEC2   |
| Disgnent | Ulcerative Colitis | ISYNA1   |
| Disgnent | Ulcerative Colitis | CHMP5    |
| Disgnent | Ulcerative Colitis | NCKIPSD  |
| Disgnent | Ulcerative Colitis | LARS1    |
| Disgnent | Ulcerative Colitis | SF3B6    |
| Disgnent | Ulcerative Colitis | SERPINF1 |
| Disgnent | Ulcerative Colitis | PF4      |
| Disgnent | Ulcerative Colitis | PGA5     |
| Disgnent | Ulcerative Colitis | PGD      |
| Disgnent | Ulcerative Colitis | SERPINE2 |
| Disgnent | Ulcerative Colitis | PIK3R1   |
| Disgnent | Ulcerative Colitis | TM6SF2   |
| Disgnent | Ulcerative Colitis | PLEK     |
| Disgnent | Ulcerative Colitis | S1PR5    |
| Disgnent | Ulcerative Colitis | P2RY13   |
| Disgnent | Ulcerative Colitis | BRWD1    |
| Disgnent | Ulcerative Colitis | PNN      |
| Disgnent | Ulcerative Colitis | TERF2IP  |
| Disgnent | Ulcerative Colitis | POMC     |
| Disgnent | Ulcerative Colitis | TOLLIP   |
| Disgnent | Ulcerative Colitis | SMOX     |
| Disgnent | Ulcerative Colitis | RBM47    |
| Disgnent | Ulcerative Colitis | DDIT4    |
| Disgnent | Ulcerative Colitis | UGT1A7   |
| Disgnent | Ulcerative Colitis | UGT1A1   |

|          |                    |            |
|----------|--------------------|------------|
| Disgnent | Ulcerative Colitis | IL17RD     |
| Disgnent | Ulcerative Colitis | AFTPH      |
| Disgnent | Ulcerative Colitis | NXPE4      |
| Disgnent | Ulcerative Colitis | BEST2      |
| Disgnent | Ulcerative Colitis | CASZ1      |
| Disgnent | Ulcerative Colitis | MKS1       |
| Disgnent | Ulcerative Colitis | MARCHF1    |
| Disgnent | Ulcerative Colitis | RAVER2     |
| Disgnent | Ulcerative Colitis | IMPACT     |
| Disgnent | Ulcerative Colitis | MIR429     |
| Disgnent | Ulcerative Colitis | MIR448     |
| Disgnent | Ulcerative Colitis | MIR449A    |
| Disgnent | Ulcerative Colitis | PREP       |
| Disgnent | Ulcerative Colitis | IL17RB     |
| Disgnent | Ulcerative Colitis | FERMT1     |
| Disgnent | Ulcerative Colitis | PRKAR1A    |
| Disgnent | Ulcerative Colitis | ST6GALNAC1 |
| Disgnent | Ulcerative Colitis | SELENOS    |
| Disgnent | Ulcerative Colitis | LANCL2     |
| Disgnent | Ulcerative Colitis | MAPK3      |
| Disgnent | Ulcerative Colitis | NSFL1C     |
| Disgnent | Ulcerative Colitis | MAPK8      |
| Disgnent | Ulcerative Colitis | MAPK9      |
| Disgnent | Ulcerative Colitis | MAP2K2     |
| Disgnent | Ulcerative Colitis | KYAT3      |
| Disgnent | Ulcerative Colitis | PARD3      |
| Disgnent | Ulcerative Colitis | HTRA1      |
| Disgnent | Ulcerative Colitis | PANX2      |
| Disgnent | Ulcerative Colitis | MUC13      |
| Disgnent | Ulcerative Colitis | SUCNR1     |
| Disgnent | Ulcerative Colitis | PSG2       |
| Disgnent | Ulcerative Colitis | PSMA7      |
| Disgnent | Ulcerative Colitis | LGALS14    |
| Disgnent | Ulcerative Colitis | ANKS1B     |
| Disgnent | Ulcerative Colitis | LXN        |
| Disgnent | Ulcerative Colitis | CHPT1      |
| Disgnent | Ulcerative Colitis | ACKR3      |
| Disgnent | Ulcerative Colitis | AKR1B10    |
| Disgnent | Ulcerative Colitis | TIGAR      |
| Disgnent | Ulcerative Colitis | LYRM4      |
| Disgnent | Ulcerative Colitis | SLURP1     |
| Disgnent | Ulcerative Colitis | PTEN       |
| Disgnent | Ulcerative Colitis | AICDA      |
| Disgnent | Ulcerative Colitis | SCYL1      |

|          |                    |          |
|----------|--------------------|----------|
| Disgnent | Ulcerative Colitis | MIR323B  |
| Disgnent | Ulcerative Colitis | MIR490   |
| Disgnent | Ulcerative Colitis | MIR495   |
| Disgnent | Ulcerative Colitis | RPTOR    |
| Disgnent | Ulcerative Colitis | CGN      |
| Disgnent | Ulcerative Colitis | MIB1     |
| Disgnent | Ulcerative Colitis | KIAA1614 |
| Disgnent | Ulcerative Colitis | PTPN4    |
| Disgnent | Ulcerative Colitis | PTPN6    |
| Disgnent | Ulcerative Colitis | ZNF410   |
| Disgnent | Ulcerative Colitis | PTX3     |
| Disgnent | Ulcerative Colitis | BAX      |
| Disgnent | Ulcerative Colitis | CXCL16   |
| Disgnent | Ulcerative Colitis | ZNF77    |
| Disgnent | Ulcerative Colitis | RAD51    |
| Disgnent | Ulcerative Colitis | RAP1A    |
| Disgnent | Ulcerative Colitis | RARRES2  |
| Disgnent | Ulcerative Colitis | PLAAT4   |
| Disgnent | Ulcerative Colitis | ACE2     |
| Disgnent | Ulcerative Colitis | BCKDHA   |
| Disgnent | Ulcerative Colitis | TRPV4    |
| Disgnent | Ulcerative Colitis | GNB4     |
| Disgnent | Ulcerative Colitis | UPF1     |
| Disgnent | Ulcerative Colitis | BCL3     |
| Disgnent | Ulcerative Colitis | RNASE2   |
| Disgnent | Ulcerative Colitis | RNASE3   |
| Disgnent | Ulcerative Colitis | IGAN1    |
| Disgnent | Ulcerative Colitis | LDAH     |
| Disgnent | Ulcerative Colitis | RNU1-4   |
| Disgnent | Ulcerative Colitis | TNFRSF17 |
| Disgnent | Ulcerative Colitis | RPGR     |
| Disgnent | Ulcerative Colitis | RPLP2    |
| Disgnent | Ulcerative Colitis | RPS19    |
| Disgnent | Ulcerative Colitis | S100A12  |
| Disgnent | Ulcerative Colitis | SLC22A23 |
| Disgnent | Ulcerative Colitis | SAT1     |
| Disgnent | Ulcerative Colitis | CLEC11A  |
| Disgnent | Ulcerative Colitis | SCNN1B   |
| Disgnent | Ulcerative Colitis | SCNN1G   |
| Disgnent | Ulcerative Colitis | CCL4     |
| Disgnent | Ulcerative Colitis | CXCL6    |
| Disgnent | Ulcerative Colitis | FAM217B  |
| Disgnent | Ulcerative Colitis | SELE     |
| Disgnent | Ulcerative Colitis | SELPLG   |

|          |                    |          |
|----------|--------------------|----------|
| Disgnent | Ulcerative Colitis | SETMAR   |
| Disgnent | Ulcerative Colitis | ABCG5    |
| Disgnent | Ulcerative Colitis | ARHGEF28 |
| Disgnent | Ulcerative Colitis | HHIP     |
| Disgnent | Ulcerative Colitis | SGK1     |
| Disgnent | Ulcerative Colitis | H3P16    |
| Disgnent | Ulcerative Colitis | NUCKS1   |
| Disgnent | Ulcerative Colitis | NORAD    |
| Disgnent | Ulcerative Colitis | IL25     |
| Disgnent | Ulcerative Colitis | PINK1    |
| Disgnent | Ulcerative Colitis | SLC1A5   |
| Disgnent | Ulcerative Colitis | SLC3A2   |
| Disgnent | Ulcerative Colitis | ZNF649   |
| Disgnent | Ulcerative Colitis | CXADRP1  |
| Disgnent | Ulcerative Colitis | SLC9A1   |
| Disgnent | Ulcerative Colitis | BMP7     |
| Disgnent | Ulcerative Colitis | SLC16A1  |
| Disgnent | Ulcerative Colitis | SMO      |
| Disgnent | Ulcerative Colitis | SMPD1    |
| Disgnent | Ulcerative Colitis | H3P37    |
| Disgnent | Ulcerative Colitis | SP1      |
| Disgnent | Ulcerative Colitis | SPG7     |
| Disgnent | Ulcerative Colitis | SPN      |
| Disgnent | Ulcerative Colitis | SRC      |
| Disgnent | Ulcerative Colitis | BRAF     |
| Disgnent | Ulcerative Colitis | SST      |
| Disgnent | Ulcerative Colitis | SSTR4    |
| Disgnent | Ulcerative Colitis | SULT1E1  |
| Disgnent | Ulcerative Colitis | AURKA    |
| Disgnent | Ulcerative Colitis | BRS3     |
| Disgnent | Ulcerative Colitis | TACR2    |
| Disgnent | Ulcerative Colitis | ADAM17   |
| Disgnent | Ulcerative Colitis | TAP1     |
| Disgnent | Ulcerative Colitis | TBXAS1   |
| Disgnent | Ulcerative Colitis | MSMP     |
| Disgnent | Ulcerative Colitis | HNF1B    |
| Disgnent | Ulcerative Colitis | MIR551B  |
| Disgnent | Ulcerative Colitis | TCF7     |
| Disgnent | Ulcerative Colitis | MIR629   |
| Disgnent | Ulcerative Colitis | ZEB1     |
| Disgnent | Ulcerative Colitis | BUB1B    |
| Disgnent | Ulcerative Colitis | TERF2    |
| Disgnent | Ulcerative Colitis | TFF1     |
| Disgnent | Ulcerative Colitis | TFF2     |

|          |                    |         |
|----------|--------------------|---------|
| Disgnent | Ulcerative Colitis | TFRC    |
| Disgnent | Ulcerative Colitis | TG      |
| Disgnent | Ulcerative Colitis | TGFA    |
| Disgnent | Ulcerative Colitis | TGFB2   |
| Disgnent | Ulcerative Colitis | TGM2    |
| Disgnent | Ulcerative Colitis | TIA1    |
| Disgnent | Ulcerative Colitis | TIAL1   |
| Disgnent | Ulcerative Colitis | TIMP3   |
| Disgnent | Ulcerative Colitis | TJP1    |
| Disgnent | Ulcerative Colitis | TP73    |
| Disgnent | Ulcerative Colitis | TPD52L1 |
| Disgnent | Ulcerative Colitis | TPH1    |
| Disgnent | Ulcerative Colitis | TPM3    |
| Disgnent | Ulcerative Colitis | TRAF3   |
| Disgnent | Ulcerative Colitis | TRAF5   |
| Disgnent | Ulcerative Colitis | C4A     |
| Disgnent | Ulcerative Colitis | MIR650  |
| Disgnent | Ulcerative Colitis | TSC1    |
| Disgnent | Ulcerative Colitis | C4BPB   |
| Disgnent | Ulcerative Colitis | MUC5B   |
| Disgnent | Ulcerative Colitis | D2HGDH  |
| Disgnent | Ulcerative Colitis | TUFM    |
| Disgnent | Ulcerative Colitis | TWIST1  |
| Disgnent | Ulcerative Colitis | UCP2    |
| Disgnent | Ulcerative Colitis | NR1H2   |
| Disgnent | Ulcerative Colitis | VCL     |
| Disgnent | Ulcerative Colitis | VIM     |
| Disgnent | Ulcerative Colitis | VIPR1   |
| Disgnent | Ulcerative Colitis | BEST1   |
| Disgnent | Ulcerative Colitis | VWF     |
| Disgnent | Ulcerative Colitis | WAS     |
| Disgnent | Ulcerative Colitis | WNT11   |
| Disgnent | Ulcerative Colitis | XRCC3   |
| Disgnent | Ulcerative Colitis | ZAP70   |
| Disgnent | Ulcerative Colitis | CA1     |
| Disgnent | Ulcerative Colitis | ZBTB16  |
| Disgnent | Ulcerative Colitis | DDR1    |
| Disgnent | Ulcerative Colitis | HPP1    |
| Disgnent | Ulcerative Colitis | FZD5    |
| Disgnent | Ulcerative Colitis | ATG9A   |
| Disgnent | Ulcerative Colitis | MMP28   |
| Disgnent | Ulcerative Colitis | FSD1    |
| Disgnent | Ulcerative Colitis | LAP     |
| Disgnent | Ulcerative Colitis | PLA2G7  |

|          |                    |           |
|----------|--------------------|-----------|
| Disgnent | Ulcerative Colitis | RNF128    |
| Disgnent | Ulcerative Colitis | MUL1      |
| Disgnent | Ulcerative Colitis | FZD3      |
| Disgnent | Ulcerative Colitis | TFPI2     |
| Disgnent | Ulcerative Colitis | CAMKMT    |
| Disgnent | Ulcerative Colitis | HDAC11    |
| Disgnent | Ulcerative Colitis | TUSC3     |
| Disgnent | Ulcerative Colitis | DHDDS     |
| Disgnent | Ulcerative Colitis | CALM1     |
| Disgnent | Ulcerative Colitis | PROSER1   |
| Disgnent | Ulcerative Colitis | CALM2     |
| Disgnent | Ulcerative Colitis | FOSL1     |
| Disgnent | Ulcerative Colitis | MPIG6B    |
| Disgnent | Ulcerative Colitis | CALM3     |
| Disgnent | Ulcerative Colitis | CAMK4     |
| Disgnent | Ulcerative Colitis | ANP32E    |
| Disgnent | Ulcerative Colitis | MED25     |
| Disgnent | Ulcerative Colitis | NCOA3     |
| Disgnent | Ulcerative Colitis | FZD1      |
| Disgnent | Ulcerative Colitis | FZD4      |
| Disgnent | Ulcerative Colitis | ARHGAP24  |
| Disgnent | Ulcerative Colitis | ITCH      |
| Disgnent | Ulcerative Colitis | LOH19CR1  |
| Disgnent | Ulcerative Colitis | FSD1L     |
| Disgnent | Ulcerative Colitis | MAGT1     |
| Disgnent | Ulcerative Colitis | ULK1      |
| Disgnent | Ulcerative Colitis | RPAIN     |
| Disgnent | Ulcerative Colitis | NR0B2     |
| Disgnent | Ulcerative Colitis | DHX16     |
| Disgnent | Ulcerative Colitis | CASR      |
| Disgnent | Ulcerative Colitis | TUBB6     |
| Disgnent | Ulcerative Colitis | IL17RC    |
| Disgnent | Ulcerative Colitis | MFSD2A    |
| Disgnent | Ulcerative Colitis | ATAD1     |
| Disgnent | Ulcerative Colitis | PIK3R3    |
| Disgnent | Ulcerative Colitis | IFITM1    |
| Disgnent | Ulcerative Colitis | HAT1      |
| Disgnent | Ulcerative Colitis | GAS7      |
| Disgnent | Ulcerative Colitis | RUNX2     |
| Disgnent | Ulcerative Colitis | BECN1     |
| Disgnent | Ulcerative Colitis | MARCO     |
| Disgnent | Ulcerative Colitis | TNFSF10   |
| Disgnent | Ulcerative Colitis | CBS       |
| Disgnent | Ulcerative Colitis | TNFRSF11A |

|          |                    |           |
|----------|--------------------|-----------|
| Disgnent | Ulcerative Colitis | TNFRSF10C |
| Disgnent | Ulcerative Colitis | IL1RL2    |
| Disgnent | Ulcerative Colitis | KYAT1     |
| Disgnent | Ulcerative Colitis | PROM1     |
| Disgnent | Ulcerative Colitis | APLN      |
| Disgnent | Ulcerative Colitis | PER2      |
| Disgnent | Ulcerative Colitis | ARHGEF7   |
| Disgnent | Ulcerative Colitis | VNN1      |
| Disgnent | Ulcerative Colitis | SQSTM1    |
| Disgnent | Ulcerative Colitis | TAX1BP1   |
| Disgnent | Ulcerative Colitis | KRIT1     |
| Disgnent | Ulcerative Colitis | CCNE1     |
| Disgnent | Ulcerative Colitis | TRPA1     |
| Disgnent | Ulcerative Colitis | PGLYRP1   |
| Disgnent | Ulcerative Colitis | MAP3K14   |
| Disgnent | Ulcerative Colitis | PSTPIP1   |
| Disgnent | Ulcerative Colitis | CD1A      |
| Disgnent | Ulcerative Colitis | LATS1     |
| Disgnent | Ulcerative Colitis | NEURL1    |
| Disgnent | Ulcerative Colitis | COX7A2L   |
| Disgnent | Ulcerative Colitis | LPAR2     |
| Disgnent | Ulcerative Colitis | GGTLC1    |
| Disgnent | Ulcerative Colitis | REEP6     |
| Disgnent | Ulcerative Colitis | GPR55     |
| Disgnent | Ulcerative Colitis | CD19      |
| Disgnent | Ulcerative Colitis | MS4A1     |
| Disgnent | Ulcerative Colitis | UBE4A     |
| Disgnent | Ulcerative Colitis | PPIG      |
| Disgnent | Ulcerative Colitis | ADIPOQ    |
| Disgnent | Ulcerative Colitis | COX5A     |
| Disgnent | Ulcerative Colitis | CYP7B1    |
| Disgnent | Ulcerative Colitis | NTN1      |
| Disgnent | Ulcerative Colitis | CD33      |
| Disgnent | Ulcerative Colitis | LY86      |
| Disgnent | Ulcerative Colitis | ARHGEF6   |
| Disgnent | Ulcerative Colitis | PCYT1B    |
| Disgnent | Ulcerative Colitis | CD37      |
| Disgnent | Ulcerative Colitis | GAL3ST1   |
| Disgnent | Ulcerative Colitis | GDF15     |
| Disgnent | Ulcerative Colitis | TBPL1     |
| Disgnent | Ulcerative Colitis | CD38      |
| Disgnent | Ulcerative Colitis | CXCL14    |
| Disgnent | Ulcerative Colitis | CCL4L2    |
| Disgnent | Ulcerative Colitis | CLOCK     |

|          |                    |         |
|----------|--------------------|---------|
| Disgnent | Ulcerative Colitis | CD40LG  |
| Disgnent | Ulcerative Colitis | CD47    |
| Disgnent | Ulcerative Colitis | ISG15   |
| Disgnent | Ulcerative Colitis | CD74    |
| Disgnent | Ulcerative Colitis | DCAF1   |
| Disgnent | Ulcerative Colitis | BMS1    |
| Disgnent | Ulcerative Colitis | ELMO1   |
| Disgnent | Ulcerative Colitis | P2RY14  |
| Disgnent | Ulcerative Colitis | SLC23A1 |
| Disgnent | Ulcerative Colitis | NR1I3   |
| Disgnent | Ulcerative Colitis | NR1H4   |
| Disgnent | Ulcerative Colitis | NR1D2   |
| Drugbank | Ulcerative Colitis | NR3C1   |
| Drugbank | Ulcerative Colitis | CYP3A4  |
| Drugbank | Ulcerative Colitis | VKORC1  |
| Drugbank | Ulcerative Colitis | UBIAD1  |
| Drugbank | Ulcerative Colitis | TPMT    |
| Drugbank | Ulcerative Colitis | TPMT    |
| Drugbank | Ulcerative Colitis | TNF     |
| Drugbank | Ulcerative Colitis | TBXAS1  |
| Drugbank | Ulcerative Colitis | SRD5A2  |
| Drugbank | Ulcerative Colitis | SLCO2B1 |
| Drugbank | Ulcerative Colitis | SLCO1B3 |
| Drugbank | Ulcerative Colitis | SLCO1B3 |
| Drugbank | Ulcerative Colitis | SLCO1B1 |
| Drugbank | Ulcerative Colitis | SLCO1B1 |
| Drugbank | Ulcerative Colitis | SLCO1A2 |
| Drugbank | Ulcerative Colitis | SLC7A11 |
| Drugbank | Ulcerative Colitis | SLC46A1 |
| Drugbank | Ulcerative Colitis | SLC29A2 |
| Drugbank | Ulcerative Colitis | SLC29A1 |
| Drugbank | Ulcerative Colitis | SLC28A3 |
| Drugbank | Ulcerative Colitis | SLC28A2 |
| Drugbank | Ulcerative Colitis | SLC22A8 |



|          |                    |          |
|----------|--------------------|----------|
| Drugbank | Ulcerative Colitis | SLC22A8  |
| Drugbank | Ulcerative Colitis | SLC22A6  |
| Drugbank | Ulcerative Colitis | SLC10A2  |
| Drugbank | Ulcerative Colitis | SLC10A1  |
| Drugbank | Ulcerative Colitis | SHBG     |
| Drugbank | Ulcerative Colitis | SHBG     |
| Drugbank | Ulcerative Colitis | SERPINA6 |
| Drugbank | Ulcerative Colitis | SCN10A   |
| Drugbank | Ulcerative Colitis | PTGS2    |
| Drugbank | Ulcerative Colitis | PTGS1    |
| Drugbank | Ulcerative Colitis | PTGS1    |
| Drugbank | Ulcerative Colitis | PTGER1   |
| Drugbank | Ulcerative Colitis | PPP3R2   |
| Drugbank | Ulcerative Colitis | PPIF     |
| Drugbank | Ulcerative Colitis | PPIA     |
| Drugbank | Ulcerative Colitis | PPAT     |
| Drugbank | Ulcerative Colitis | PPARG    |
| Drugbank | Ulcerative Colitis | PPARG    |
| Drugbank | Ulcerative Colitis | PPARG    |
| Drugbank | Ulcerative Colitis | PLA2G1B  |
| Drugbank | Ulcerative Colitis | NR3C1    |
| Drugbank | Ulcerative Colitis | NR1I2    |
| Drugbank | Ulcerative Colitis | NR0B1    |
| Drugbank | Ulcerative Colitis | NOS2     |
| Drugbank | Ulcerative Colitis | NAT1     |
| Drugbank | Ulcerative Colitis | MPO      |





|           |                    |         |
|-----------|--------------------|---------|
| Drugbank  | Ulcerative Colitis | CYP17A1 |
| Drugbank  | Ulcerative Colitis | CYP11B2 |
| Drugbank  | Ulcerative Colitis | CYP11B2 |
| Drugbank  | Ulcerative Colitis | CYP11B2 |
| Drugbank  | Ulcerative Colitis | CYP11B1 |
| Drugbank  | Ulcerative Colitis | CHUK    |
| Drugbank  | Ulcerative Colitis | CHUK    |
| Drugbank  | Ulcerative Colitis | CAMLG   |
| Drugbank  | Ulcerative Colitis | BGLAP   |
| Drugbank  | Ulcerative Colitis | BCHE    |
| Drugbank  | Ulcerative Colitis | AOX1    |
| Drugbank  | Ulcerative Colitis | ANXA1   |
| Drugbank  | Ulcerative Colitis | ALOX5   |
| Drugbank  | Ulcerative Colitis | ALOX5   |
| Drugbank  | Ulcerative Colitis | ALOX5   |
| Drugbank  | Ulcerative Colitis | ALB     |
| Drugbank  | Ulcerative Colitis | ACAT1   |
| Drugbank  | Ulcerative Colitis | ABCC5   |
| Drugbank  | Ulcerative Colitis | ABCC4   |
| Drugbank  | Ulcerative Colitis | ABCC2   |
| Drugbank  | Ulcerative Colitis | ABCC2   |
| Drugbank  | Ulcerative Colitis | ABCC2   |
| Drugbank  | Ulcerative Colitis | ABCC10  |
| Drugbank  | Ulcerative Colitis | ABCB11  |
| Drugbank  | Ulcerative Colitis | ABCB11  |
| Drugbank  | Ulcerative Colitis | ABCB11  |
| GeneCards | Ulcerative Colitis | NOD2    |
| GeneCards | Ulcerative Colitis | IL10    |
| GeneCards | Ulcerative Colitis | IL6     |

|           |                    |          |
|-----------|--------------------|----------|
| GeneCards | Ulcerative Colitis | TNF      |
| GeneCards | Ulcerative Colitis | IL23R    |
| GeneCards | Ulcerative Colitis | IL1B     |
| GeneCards | Ulcerative Colitis | TLR4     |
| GeneCards | Ulcerative Colitis | HLA-DRB1 |
| GeneCards | Ulcerative Colitis | ABCB1    |
| GeneCards | Ulcerative Colitis | TGFB1    |
| GeneCards | Ulcerative Colitis | CXCL8    |
| GeneCards | Ulcerative Colitis | IL10RA   |
| GeneCards | Ulcerative Colitis | TLR2     |
| GeneCards | Ulcerative Colitis | MPO      |
| GeneCards | Ulcerative Colitis | INAVA    |
| GeneCards | Ulcerative Colitis | HLA-B    |
| GeneCards | Ulcerative Colitis | SYK      |
| GeneCards | Ulcerative Colitis | IFNG     |
| GeneCards | Ulcerative Colitis | IL2      |
| GeneCards | Ulcerative Colitis | IL37     |
| GeneCards | Ulcerative Colitis | ATG16L1  |
| GeneCards | Ulcerative Colitis | PRKCQ    |
| GeneCards | Ulcerative Colitis | RELA     |
| GeneCards | Ulcerative Colitis | CTLA4    |
| GeneCards | Ulcerative Colitis | TP53     |
| GeneCards | Ulcerative Colitis | IL1RN    |
| GeneCards | Ulcerative Colitis | IRF5     |
| GeneCards | Ulcerative Colitis | NFKB1    |
| GeneCards | Ulcerative Colitis | IL4      |
| GeneCards | Ulcerative Colitis | FOXP3    |
| GeneCards | Ulcerative Colitis | CRP      |
| GeneCards | Ulcerative Colitis | MLH1     |
| GeneCards | Ulcerative Colitis | IRGM     |
| GeneCards | Ulcerative Colitis | PLA2G4A  |
| GeneCards | Ulcerative Colitis | IL10RB   |
| GeneCards | Ulcerative Colitis | MEFV     |
| GeneCards | Ulcerative Colitis | FAS      |
| GeneCards | Ulcerative Colitis | CTNNB1   |
| GeneCards | Ulcerative Colitis | IL17A    |
| GeneCards | Ulcerative Colitis | CCR6     |
| GeneCards | Ulcerative Colitis | SLC11A1  |
| GeneCards | Ulcerative Colitis | PTGS2    |
| GeneCards | Ulcerative Colitis | MST1     |
| GeneCards | Ulcerative Colitis | ELANE    |
| GeneCards | Ulcerative Colitis | STAT3    |
| GeneCards | Ulcerative Colitis | BTNL2    |
| GeneCards | Ulcerative Colitis | AKT1     |

|           |                    |          |
|-----------|--------------------|----------|
| GeneCards | Ulcerative Colitis | IL13     |
| GeneCards | Ulcerative Colitis | TNFAIP3  |
| GeneCards | Ulcerative Colitis | SMAD4    |
| GeneCards | Ulcerative Colitis | GAST     |
| GeneCards | Ulcerative Colitis | LTF      |
| GeneCards | Ulcerative Colitis | STAT4    |
| GeneCards | Ulcerative Colitis | SMAD7    |
| GeneCards | Ulcerative Colitis | MMP9     |
| GeneCards | Ulcerative Colitis | MMP1     |
| GeneCards | Ulcerative Colitis | MUC2     |
| GeneCards | Ulcerative Colitis | PPARG    |
| GeneCards | Ulcerative Colitis | MSH2     |
| GeneCards | Ulcerative Colitis | IL5      |
| GeneCards | Ulcerative Colitis | NLRP3    |
| GeneCards | Ulcerative Colitis | CHEK2    |
| GeneCards | Ulcerative Colitis | VEGFA    |
| GeneCards | Ulcerative Colitis | TPMT     |
| GeneCards | Ulcerative Colitis | TNFRSF1A |
| GeneCards | Ulcerative Colitis | MSH6     |
| GeneCards | Ulcerative Colitis | CDH1     |
| GeneCards | Ulcerative Colitis | HSPA4    |
| GeneCards | Ulcerative Colitis | MYO9B    |
| GeneCards | Ulcerative Colitis | CCR3     |
| GeneCards | Ulcerative Colitis | REL      |
| GeneCards | Ulcerative Colitis | STAT6    |
| GeneCards | Ulcerative Colitis | HLA-DQB1 |
| GeneCards | Ulcerative Colitis | GPR35    |
| GeneCards | Ulcerative Colitis | S100A8   |
| GeneCards | Ulcerative Colitis | ZFP90    |
| GeneCards | Ulcerative Colitis | PSTPIP1  |
| GeneCards | Ulcerative Colitis | PIK3CA   |
| GeneCards | Ulcerative Colitis | NOS2     |
| GeneCards | Ulcerative Colitis | S100A12  |
| GeneCards | Ulcerative Colitis | JAK2     |
| GeneCards | Ulcerative Colitis | APC      |
| GeneCards | Ulcerative Colitis | IL18     |
| GeneCards | Ulcerative Colitis | REG4     |
| GeneCards | Ulcerative Colitis | CYP2C19  |
| GeneCards | Ulcerative Colitis | PTPN22   |
| GeneCards | Ulcerative Colitis | LACC1    |
| GeneCards | Ulcerative Colitis | HRH2     |
| GeneCards | Ulcerative Colitis | ALB      |
| GeneCards | Ulcerative Colitis | ICAM1    |
| GeneCards | Ulcerative Colitis | CLDN18   |

|           |                    |         |
|-----------|--------------------|---------|
| GeneCards | Ulcerative Colitis | NCF4    |
| GeneCards | Ulcerative Colitis | TCF4    |
| GeneCards | Ulcerative Colitis | GATA3   |
| GeneCards | Ulcerative Colitis | CYBC1   |
| GeneCards | Ulcerative Colitis | SMAD3   |
| GeneCards | Ulcerative Colitis | CARD9   |
| GeneCards | Ulcerative Colitis | CD4     |
| GeneCards | Ulcerative Colitis | IFNGR1  |
| GeneCards | Ulcerative Colitis | CAT     |
| GeneCards | Ulcerative Colitis | SLC22A4 |
| GeneCards | Ulcerative Colitis | IL12A   |
| GeneCards | Ulcerative Colitis | ADA2    |
| GeneCards | Ulcerative Colitis | XIAP    |
| GeneCards | Ulcerative Colitis | IL2RA   |
| GeneCards | Ulcerative Colitis | SLC22A5 |
| GeneCards | Ulcerative Colitis | FGF2    |
| GeneCards | Ulcerative Colitis | TNFSF15 |
| GeneCards | Ulcerative Colitis | RIPK1   |
| GeneCards | Ulcerative Colitis | FASLG   |
| GeneCards | Ulcerative Colitis | CCR1    |
| GeneCards | Ulcerative Colitis | CCL2    |
| GeneCards | Ulcerative Colitis | ERAP1   |
| GeneCards | Ulcerative Colitis | MUC12   |
| GeneCards | Ulcerative Colitis | C4A     |
| GeneCards | Ulcerative Colitis | NOD1    |
| GeneCards | Ulcerative Colitis | F5      |
| GeneCards | Ulcerative Colitis | PTGS1   |
| GeneCards | Ulcerative Colitis | F2      |
| GeneCards | Ulcerative Colitis | DEFB4A  |
| GeneCards | Ulcerative Colitis | SOCS1   |
| GeneCards | Ulcerative Colitis | CCL11   |
| GeneCards | Ulcerative Colitis | CARD8   |
| GeneCards | Ulcerative Colitis | CD40LG  |
| GeneCards | Ulcerative Colitis | IL1A    |
| GeneCards | Ulcerative Colitis | UCN     |
| GeneCards | Ulcerative Colitis | SST     |
| GeneCards | Ulcerative Colitis | IL22    |
| GeneCards | Ulcerative Colitis | TYK2    |
| GeneCards | Ulcerative Colitis | DUOX2   |
| GeneCards | Ulcerative Colitis | FGFR2   |
| GeneCards | Ulcerative Colitis | BRAF    |
| GeneCards | Ulcerative Colitis | VDR     |
| GeneCards | Ulcerative Colitis | IL1R1   |
| GeneCards | Ulcerative Colitis | HLA-A   |

|           |                    |          |
|-----------|--------------------|----------|
| GeneCards | Ulcerative Colitis | CDKN1A   |
| GeneCards | Ulcerative Colitis | MET      |
| GeneCards | Ulcerative Colitis | TNFRSF1B |
| GeneCards | Ulcerative Colitis | IL12B    |
| GeneCards | Ulcerative Colitis | EGF      |
| GeneCards | Ulcerative Colitis | TFF3     |
| GeneCards | Ulcerative Colitis | CCND1    |
| GeneCards | Ulcerative Colitis | CHGA     |
| GeneCards | Ulcerative Colitis | MIR21    |
| GeneCards | Ulcerative Colitis | NGF      |
| GeneCards | Ulcerative Colitis | IL21     |
| GeneCards | Ulcerative Colitis | ATP4A    |
| GeneCards | Ulcerative Colitis | H19      |
| GeneCards | Ulcerative Colitis | TLR5     |
| GeneCards | Ulcerative Colitis | BAX      |
| GeneCards | Ulcerative Colitis | NTRK1    |
| GeneCards | Ulcerative Colitis | NCF1     |
| GeneCards | Ulcerative Colitis | S100A9   |
| GeneCards | Ulcerative Colitis | PRTN3    |
| GeneCards | Ulcerative Colitis | CSF2     |
| GeneCards | Ulcerative Colitis | HLA-DQA1 |
| GeneCards | Ulcerative Colitis | NKX2-3   |
| GeneCards | Ulcerative Colitis | SLC37A4  |
| GeneCards | Ulcerative Colitis | UBAC2    |
| GeneCards | Ulcerative Colitis | MMP2     |
| GeneCards | Ulcerative Colitis | ICOSLG   |
| GeneCards | Ulcerative Colitis | CIITA    |
| GeneCards | Ulcerative Colitis | IFNG-AS1 |
| GeneCards | Ulcerative Colitis | IL7R     |
| GeneCards | Ulcerative Colitis | KLRC4    |
| GeneCards | Ulcerative Colitis | TIMP1    |
| GeneCards | Ulcerative Colitis | SEMA4D   |
| GeneCards | Ulcerative Colitis | HMOX1    |
| GeneCards | Ulcerative Colitis | APOH     |
| GeneCards | Ulcerative Colitis | FGFR3    |
| GeneCards | Ulcerative Colitis | ITGB2    |
| GeneCards | Ulcerative Colitis | IL23A    |
| GeneCards | Ulcerative Colitis | RNASE3   |
| GeneCards | Ulcerative Colitis | CXCL5    |
| GeneCards | Ulcerative Colitis | MTHFR    |
| GeneCards | Ulcerative Colitis | MIF      |
| GeneCards | Ulcerative Colitis | ITGB4    |
| GeneCards | Ulcerative Colitis | LTA      |
| GeneCards | Ulcerative Colitis | ERBB2    |



|           |                    |           |
|-----------|--------------------|-----------|
| GeneCards | Ulcerative Colitis | PTEN      |
| GeneCards | Ulcerative Colitis | PALB2     |
| GeneCards | Ulcerative Colitis | POLD1     |
| GeneCards | Ulcerative Colitis | KRAS      |
| GeneCards | Ulcerative Colitis | BACH2     |
| GeneCards | Ulcerative Colitis | CP        |
| GeneCards | Ulcerative Colitis | TFF2      |
| GeneCards | Ulcerative Colitis | IL17F     |
| GeneCards | Ulcerative Colitis | CDKN1B    |
| GeneCards | Ulcerative Colitis | FCGR2A    |
| GeneCards | Ulcerative Colitis | SERPINC1  |
| GeneCards | Ulcerative Colitis | CARMIL2   |
| GeneCards | Ulcerative Colitis | PTPN2     |
| GeneCards | Ulcerative Colitis | MMP3      |
| GeneCards | Ulcerative Colitis | CYP3A4    |
| GeneCards | Ulcerative Colitis | SERPINE1  |
| GeneCards | Ulcerative Colitis | HP        |
| GeneCards | Ulcerative Colitis | TLR9      |
| GeneCards | Ulcerative Colitis | TP63      |
| GeneCards | Ulcerative Colitis | PDGFB     |
| GeneCards | Ulcerative Colitis | IBD3      |
| GeneCards | Ulcerative Colitis | CD79A     |
| GeneCards | Ulcerative Colitis | PLCG2     |
| GeneCards | Ulcerative Colitis | RTEL1     |
| GeneCards | Ulcerative Colitis | ACE       |
| GeneCards | Ulcerative Colitis | MAP3K7    |
| GeneCards | Ulcerative Colitis | FERMT1    |
| GeneCards | Ulcerative Colitis | PLG       |
| GeneCards | Ulcerative Colitis | STAT1     |
| GeneCards | Ulcerative Colitis | TFF1      |
| GeneCards | Ulcerative Colitis | DEFA5     |
| GeneCards | Ulcerative Colitis | HPS1      |
| GeneCards | Ulcerative Colitis | MADCAM1   |
| GeneCards | Ulcerative Colitis | CCL5      |
| GeneCards | Ulcerative Colitis | PTPRC     |
| GeneCards | Ulcerative Colitis | IL15      |
| GeneCards | Ulcerative Colitis | MVK       |
| GeneCards | Ulcerative Colitis | SPP1      |
| GeneCards | Ulcerative Colitis | CDKN2A    |
| GeneCards | Ulcerative Colitis | NCF4-AS1  |
| GeneCards | Ulcerative Colitis | KIT       |
| GeneCards | Ulcerative Colitis | FOXD2-AS1 |
| GeneCards | Ulcerative Colitis | PYY       |
| GeneCards | Ulcerative Colitis | ZAP70     |

|           |                    |              |
|-----------|--------------------|--------------|
| GeneCards | Ulcerative Colitis | CD40         |
| GeneCards | Ulcerative Colitis | CXCL10       |
| GeneCards | Ulcerative Colitis | XDH          |
| GeneCards | Ulcerative Colitis | MICA         |
| GeneCards | Ulcerative Colitis | PTGER4       |
| GeneCards | Ulcerative Colitis | DLG5         |
| GeneCards | Ulcerative Colitis | HGF          |
| GeneCards | Ulcerative Colitis | MIR143       |
| GeneCards | Ulcerative Colitis | HLA-C        |
| GeneCards | Ulcerative Colitis | DLL4         |
| GeneCards | Ulcerative Colitis | LOC106029312 |
| GeneCards | Ulcerative Colitis | MASP2        |
| GeneCards | Ulcerative Colitis | FCGR3A       |
| GeneCards | Ulcerative Colitis | EGFR         |
| GeneCards | Ulcerative Colitis | EPX          |
| GeneCards | Ulcerative Colitis | BCL10        |
| GeneCards | Ulcerative Colitis | RET          |
| GeneCards | Ulcerative Colitis | VCAM1        |
| GeneCards | Ulcerative Colitis | CCN2         |
| GeneCards | Ulcerative Colitis | CDKN2B       |
| GeneCards | Ulcerative Colitis | ITGA4        |
| GeneCards | Ulcerative Colitis | CD14         |
| GeneCards | Ulcerative Colitis | MIR145       |
| GeneCards | Ulcerative Colitis | PLA2G2A      |
| GeneCards | Ulcerative Colitis | INS          |
| GeneCards | Ulcerative Colitis | CYP2C9       |
| GeneCards | Ulcerative Colitis | TERT         |
| GeneCards | Ulcerative Colitis | NPM1         |
| GeneCards | Ulcerative Colitis | CLDN4        |
| GeneCards | Ulcerative Colitis | IBD21        |
| GeneCards | Ulcerative Colitis | EP300        |
| GeneCards | Ulcerative Colitis | LAMB1        |
| GeneCards | Ulcerative Colitis | GRP          |
| GeneCards | Ulcerative Colitis | CTSG         |
| GeneCards | Ulcerative Colitis | IGF2         |
| GeneCards | Ulcerative Colitis | MIR34A       |
| GeneCards | Ulcerative Colitis | EPCAM        |
| GeneCards | Ulcerative Colitis | TAC1         |
| GeneCards | Ulcerative Colitis | HIF1A        |
| GeneCards | Ulcerative Colitis | PRKCD        |
| GeneCards | Ulcerative Colitis | SH2D1A       |
| GeneCards | Ulcerative Colitis | VIP          |
| GeneCards | Ulcerative Colitis | CYLD         |
| GeneCards | Ulcerative Colitis | CASP1        |

|           |                    |         |
|-----------|--------------------|---------|
| GeneCards | Ulcerative Colitis | KRT7    |
| GeneCards | Ulcerative Colitis | SELE    |
| GeneCards | Ulcerative Colitis | MIR126  |
| GeneCards | Ulcerative Colitis | SCT     |
| GeneCards | Ulcerative Colitis | ATP12A  |
| GeneCards | Ulcerative Colitis | CCT5    |
| GeneCards | Ulcerative Colitis | IL26    |
| GeneCards | Ulcerative Colitis | CD8A    |
| GeneCards | Ulcerative Colitis | CALCA   |
| GeneCards | Ulcerative Colitis | IBD5    |
| GeneCards | Ulcerative Colitis | CD80    |
| GeneCards | Ulcerative Colitis | MICB    |
| GeneCards | Ulcerative Colitis | COL7A1  |
| GeneCards | Ulcerative Colitis | SOD1    |
| GeneCards | Ulcerative Colitis | RIPK2   |
| GeneCards | Ulcerative Colitis | IL11    |
| GeneCards | Ulcerative Colitis | MIR141  |
| GeneCards | Ulcerative Colitis | BCL2    |
| GeneCards | Ulcerative Colitis | MUC5AC  |
| GeneCards | Ulcerative Colitis | TTC7A   |
| GeneCards | Ulcerative Colitis | FUT2    |
| GeneCards | Ulcerative Colitis | PSC     |
| GeneCards | Ulcerative Colitis | HLA-DRA |
| GeneCards | Ulcerative Colitis | TAP2    |
| GeneCards | Ulcerative Colitis | NFKBIA  |
| GeneCards | Ulcerative Colitis | CLEC7A  |
| GeneCards | Ulcerative Colitis | ITGAL   |
| GeneCards | Ulcerative Colitis | CYP2D6  |
| GeneCards | Ulcerative Colitis | STXBP2  |
| GeneCards | Ulcerative Colitis | HPS3    |
| GeneCards | Ulcerative Colitis | CCL20   |
| GeneCards | Ulcerative Colitis | LRBA    |
| GeneCards | Ulcerative Colitis | IBD2    |
| GeneCards | Ulcerative Colitis | HPS4    |
| GeneCards | Ulcerative Colitis | CCL3    |
| GeneCards | Ulcerative Colitis | CSF3    |
| GeneCards | Ulcerative Colitis | WRN     |
| GeneCards | Ulcerative Colitis | RAB7A   |
| GeneCards | Ulcerative Colitis | CCK     |
| GeneCards | Ulcerative Colitis | LCN2    |
| GeneCards | Ulcerative Colitis | RASGRP1 |
| GeneCards | Ulcerative Colitis | MYO1B   |
| GeneCards | Ulcerative Colitis | SOCS3   |
| GeneCards | Ulcerative Colitis | CLDN2   |

|           |                    |                |
|-----------|--------------------|----------------|
| GeneCards | Ulcerative Colitis | NAT2           |
| GeneCards | Ulcerative Colitis | CCR5           |
| GeneCards | Ulcerative Colitis | PECAM1         |
| GeneCards | Ulcerative Colitis | CD28           |
| GeneCards | Ulcerative Colitis | TAP1           |
| GeneCards | Ulcerative Colitis | ARID1A         |
| GeneCards | Ulcerative Colitis | CDH3           |
| GeneCards | Ulcerative Colitis | LGALS3         |
| GeneCards | Ulcerative Colitis | CD55           |
| GeneCards | Ulcerative Colitis | PDCD1          |
| GeneCards | Ulcerative Colitis | F3             |
| GeneCards | Ulcerative Colitis | TCN2           |
| GeneCards | Ulcerative Colitis | NFATC1         |
| GeneCards | Ulcerative Colitis | IL1RAPL2       |
| GeneCards | Ulcerative Colitis | NFE2L2         |
| GeneCards | Ulcerative Colitis | MBL2           |
| GeneCards | Ulcerative Colitis | IGF1           |
| GeneCards | Ulcerative Colitis | IL33           |
| GeneCards | Ulcerative Colitis | RTEL1-TNFRSF6B |
| GeneCards | Ulcerative Colitis | CFB            |
| GeneCards | Ulcerative Colitis | BPI            |
| GeneCards | Ulcerative Colitis | CASP10         |
| GeneCards | Ulcerative Colitis | GHRL           |
| GeneCards | Ulcerative Colitis | FN1            |
| GeneCards | Ulcerative Colitis | CDX2           |
| GeneCards | Ulcerative Colitis | ITGAM          |
| GeneCards | Ulcerative Colitis | POLE           |
| GeneCards | Ulcerative Colitis | TAPBP          |
| GeneCards | Ulcerative Colitis | TGFA           |
| GeneCards | Ulcerative Colitis | ATM            |
| GeneCards | Ulcerative Colitis | MLN            |
| GeneCards | Ulcerative Colitis | JAK1           |
| GeneCards | Ulcerative Colitis | MT-CO1         |
| GeneCards | Ulcerative Colitis | GSTM1          |
| GeneCards | Ulcerative Colitis | TREX1          |
| GeneCards | Ulcerative Colitis | CXCL2          |
| GeneCards | Ulcerative Colitis | CYP1A2         |
| GeneCards | Ulcerative Colitis | MIR155         |
| GeneCards | Ulcerative Colitis | CYP3A5         |
| GeneCards | Ulcerative Colitis | AGR2           |
| GeneCards | Ulcerative Colitis | CXCL1          |
| GeneCards | Ulcerative Colitis | HNF4A          |
| GeneCards | Ulcerative Colitis | FGF10          |
| GeneCards | Ulcerative Colitis | SRC            |

|           |                    |          |
|-----------|--------------------|----------|
| GeneCards | Ulcerative Colitis | MIR215   |
| GeneCards | Ulcerative Colitis | FGF7     |
| GeneCards | Ulcerative Colitis | ITGAX    |
| GeneCards | Ulcerative Colitis | TJP1     |
| GeneCards | Ulcerative Colitis | WAS      |
| GeneCards | Ulcerative Colitis | AURKA    |
| GeneCards | Ulcerative Colitis | TTR      |
| GeneCards | Ulcerative Colitis | PMS2     |
| GeneCards | Ulcerative Colitis | NR1H2    |
| GeneCards | Ulcerative Colitis | SLC6A4   |
| GeneCards | Ulcerative Colitis | MLH3     |
| GeneCards | Ulcerative Colitis | FCGR3B   |
| GeneCards | Ulcerative Colitis | BLM      |
| GeneCards | Ulcerative Colitis | CD27     |
| GeneCards | Ulcerative Colitis | MUTYH    |
| GeneCards | Ulcerative Colitis | HLA-DPB1 |
| GeneCards | Ulcerative Colitis | CD36     |
| GeneCards | Ulcerative Colitis | DNMT1    |
| GeneCards | Ulcerative Colitis | ACSM3    |
| GeneCards | Ulcerative Colitis | BRINP3   |
| GeneCards | Ulcerative Colitis | BRCA2    |
| GeneCards | Ulcerative Colitis | AQP8     |
| GeneCards | Ulcerative Colitis | GCG      |
| GeneCards | Ulcerative Colitis | SLC26A3  |
| GeneCards | Ulcerative Colitis | RUNX3    |
| GeneCards | Ulcerative Colitis | MKI67    |
| GeneCards | Ulcerative Colitis | PIK3R1   |
| GeneCards | Ulcerative Colitis | CXCR2    |
| GeneCards | Ulcerative Colitis | MYC      |
| GeneCards | Ulcerative Colitis | SOX9     |
| GeneCards | Ulcerative Colitis | IL18RAP  |
| GeneCards | Ulcerative Colitis | MUC6     |
| GeneCards | Ulcerative Colitis | IL27     |
| GeneCards | Ulcerative Colitis | PRF1     |
| GeneCards | Ulcerative Colitis | MIR140   |
| GeneCards | Ulcerative Colitis | LMNA     |
| GeneCards | Ulcerative Colitis | NRAS     |
| GeneCards | Ulcerative Colitis | RNF186   |
| GeneCards | Ulcerative Colitis | GSTP1    |
| GeneCards | Ulcerative Colitis | PDGFRL   |
| GeneCards | Ulcerative Colitis | DCLRE1C  |
| GeneCards | Ulcerative Colitis | ALOX5    |
| GeneCards | Ulcerative Colitis | INPP5D   |
| GeneCards | Ulcerative Colitis | IL19     |

|           |                    |           |
|-----------|--------------------|-----------|
| GeneCards | Ulcerative Colitis | FOXC2     |
| GeneCards | Ulcerative Colitis | TET2      |
| GeneCards | Ulcerative Colitis | LEP       |
| GeneCards | Ulcerative Colitis | KRT20     |
| GeneCards | Ulcerative Colitis | IL12RB2   |
| GeneCards | Ulcerative Colitis | MUC1      |
| GeneCards | Ulcerative Colitis | SELP      |
| GeneCards | Ulcerative Colitis | CXCR1     |
| GeneCards | Ulcerative Colitis | CSF1      |
| GeneCards | Ulcerative Colitis | IBD8      |
| GeneCards | Ulcerative Colitis | SOD2      |
| GeneCards | Ulcerative Colitis | SELL      |
| GeneCards | Ulcerative Colitis | ADA       |
| GeneCards | Ulcerative Colitis | HRAS      |
| GeneCards | Ulcerative Colitis | MIR203A   |
| GeneCards | Ulcerative Colitis | AOC1      |
| GeneCards | Ulcerative Colitis | MIR192    |
| GeneCards | Ulcerative Colitis | PDGFRB    |
| GeneCards | Ulcerative Colitis | PLAU      |
| GeneCards | Ulcerative Colitis | HMGB1     |
| GeneCards | Ulcerative Colitis | STING1    |
| GeneCards | Ulcerative Colitis | PI4KA     |
| GeneCards | Ulcerative Colitis | DEFB1     |
| GeneCards | Ulcerative Colitis | DMBT1     |
| GeneCards | Ulcerative Colitis | AGER      |
| GeneCards | Ulcerative Colitis | NLRP1     |
| GeneCards | Ulcerative Colitis | TLR3      |
| GeneCards | Ulcerative Colitis | OTUD3     |
| GeneCards | Ulcerative Colitis | TMEFF2    |
| GeneCards | Ulcerative Colitis | CTNNA1    |
| GeneCards | Ulcerative Colitis | NR1H4     |
| GeneCards | Ulcerative Colitis | GUSB      |
| GeneCards | Ulcerative Colitis | RFX5      |
| GeneCards | Ulcerative Colitis | F2RL1     |
| GeneCards | Ulcerative Colitis | AXIN2     |
| GeneCards | Ulcerative Colitis | MIRLET7A1 |
| GeneCards | Ulcerative Colitis | CD274     |
| GeneCards | Ulcerative Colitis | SRP54     |
| GeneCards | Ulcerative Colitis | AQP5      |
| GeneCards | Ulcerative Colitis | BGLAP     |
| GeneCards | Ulcerative Colitis | ORMDL3    |
| GeneCards | Ulcerative Colitis | ODC1      |
| GeneCards | Ulcerative Colitis | CCR9      |
| GeneCards | Ulcerative Colitis | CYBA      |

|           |                    |              |
|-----------|--------------------|--------------|
| GeneCards | Ulcerative Colitis | BRCA1        |
| GeneCards | Ulcerative Colitis | IBD7         |
| GeneCards | Ulcerative Colitis | TEK          |
| GeneCards | Ulcerative Colitis | DCC          |
| GeneCards | Ulcerative Colitis | KRT1         |
| GeneCards | Ulcerative Colitis | STAT5A       |
| GeneCards | Ulcerative Colitis | IL6R         |
| GeneCards | Ulcerative Colitis | MTR          |
| GeneCards | Ulcerative Colitis | ATRIP        |
| GeneCards | Ulcerative Colitis | INS-IGF2     |
| GeneCards | Ulcerative Colitis | SKIV2L       |
| GeneCards | Ulcerative Colitis | SLC9A3       |
| GeneCards | Ulcerative Colitis | DEFB103B     |
| GeneCards | Ulcerative Colitis | BCL2L1       |
| GeneCards | Ulcerative Colitis | MMP7         |
| GeneCards | Ulcerative Colitis | CXCR3        |
| GeneCards | Ulcerative Colitis | CLDN8        |
| GeneCards | Ulcerative Colitis | IKZF1        |
| GeneCards | Ulcerative Colitis | IL17RA       |
| GeneCards | Ulcerative Colitis | LOC110806262 |
| GeneCards | Ulcerative Colitis | THBD         |
| GeneCards | Ulcerative Colitis | ESR1         |
| GeneCards | Ulcerative Colitis | LGR5         |
| GeneCards | Ulcerative Colitis | MBTPS2       |
| GeneCards | Ulcerative Colitis | MIR127       |
| GeneCards | Ulcerative Colitis | PTPN12       |
| GeneCards | Ulcerative Colitis | HSPA2        |
| GeneCards | Ulcerative Colitis | BRIP1        |
| GeneCards | Ulcerative Colitis | KDR          |
| GeneCards | Ulcerative Colitis | RBFOX1       |
| GeneCards | Ulcerative Colitis | IBD6         |
| GeneCards | Ulcerative Colitis | SERPINA1     |
| GeneCards | Ulcerative Colitis | FBXW7        |
| GeneCards | Ulcerative Colitis | PLA2G2E      |
| GeneCards | Ulcerative Colitis | IRF1         |
| GeneCards | Ulcerative Colitis | CXCL12       |
| GeneCards | Ulcerative Colitis | GBA          |
| GeneCards | Ulcerative Colitis | PDGFRA       |
| GeneCards | Ulcerative Colitis | IFIH1        |
| GeneCards | Ulcerative Colitis | GSTT1        |
| GeneCards | Ulcerative Colitis | HSPD1        |
| GeneCards | Ulcerative Colitis | NOTCH1       |
| GeneCards | Ulcerative Colitis | JUN          |
| GeneCards | Ulcerative Colitis | PTPN11       |

|           |                    |          |
|-----------|--------------------|----------|
| GeneCards | Ulcerative Colitis | IL3      |
| GeneCards | Ulcerative Colitis | GALNT12  |
| GeneCards | Ulcerative Colitis | CD44     |
| GeneCards | Ulcerative Colitis | MCL1     |
| GeneCards | Ulcerative Colitis | MIR451A  |
| GeneCards | Ulcerative Colitis | TOR1A    |
| GeneCards | Ulcerative Colitis | ITGB1    |
| GeneCards | Ulcerative Colitis | IDO1     |
| GeneCards | Ulcerative Colitis | CCNY     |
| GeneCards | Ulcerative Colitis | MIR146A  |
| GeneCards | Ulcerative Colitis | IRAK1    |
| GeneCards | Ulcerative Colitis | STX11    |
| GeneCards | Ulcerative Colitis | TACR1    |
| GeneCards | Ulcerative Colitis | PRSS1    |
| GeneCards | Ulcerative Colitis | MIR4284  |
| GeneCards | Ulcerative Colitis | PUS10    |
| GeneCards | Ulcerative Colitis | LRRK2    |
| GeneCards | Ulcerative Colitis | GSDMB    |
| GeneCards | Ulcerative Colitis | MIR34C   |
| GeneCards | Ulcerative Colitis | HLA-DRB9 |
| GeneCards | Ulcerative Colitis | GPX1     |
| GeneCards | Ulcerative Colitis | NQO1     |
| GeneCards | Ulcerative Colitis | IFNA2    |
| GeneCards | Ulcerative Colitis | CASP3    |
| GeneCards | Ulcerative Colitis | ABCG2    |
| GeneCards | Ulcerative Colitis | IRF8     |
| GeneCards | Ulcerative Colitis | HLA-E    |
| GeneCards | Ulcerative Colitis | LAMC2    |
| GeneCards | Ulcerative Colitis | CYP1A1   |
| GeneCards | Ulcerative Colitis | PTH      |
| GeneCards | Ulcerative Colitis | FCGR2B   |
| GeneCards | Ulcerative Colitis | MMP13    |
| GeneCards | Ulcerative Colitis | SIAE     |
| GeneCards | Ulcerative Colitis | NLRP12   |
| GeneCards | Ulcerative Colitis | CAV1     |
| GeneCards | Ulcerative Colitis | UNC13D   |
| GeneCards | Ulcerative Colitis | TCERG1   |
| GeneCards | Ulcerative Colitis | MUC3A    |
| GeneCards | Ulcerative Colitis | CD86     |
| GeneCards | Ulcerative Colitis | VWF      |
| GeneCards | Ulcerative Colitis | GNAS     |
| GeneCards | Ulcerative Colitis | NR3C1    |
| GeneCards | Ulcerative Colitis | RHOA     |
| GeneCards | Ulcerative Colitis | TREM1    |



|           |                    |         |
|-----------|--------------------|---------|
| GeneCards | Ulcerative Colitis | ICAM3   |
| GeneCards | Ulcerative Colitis | ECM1    |
| GeneCards | Ulcerative Colitis | HPGD    |
| GeneCards | Ulcerative Colitis | IBD4    |
| GeneCards | Ulcerative Colitis | IBD9    |
| GeneCards | Ulcerative Colitis | TBX21   |
| GeneCards | Ulcerative Colitis | ADIPOQ  |
| GeneCards | Ulcerative Colitis | HLA-G   |
| GeneCards | Ulcerative Colitis | C4B     |
| GeneCards | Ulcerative Colitis | CEP43   |
| GeneCards | Ulcerative Colitis | XRCC1   |
| GeneCards | Ulcerative Colitis | EDN1    |
| GeneCards | Ulcerative Colitis | NTS     |
| GeneCards | Ulcerative Colitis | MGMT    |
| GeneCards | Ulcerative Colitis | INSL6   |
| GeneCards | Ulcerative Colitis | MIR26A1 |
| GeneCards | Ulcerative Colitis | CD46    |
| GeneCards | Ulcerative Colitis | EPO     |
| GeneCards | Ulcerative Colitis | SATB2   |
| GeneCards | Ulcerative Colitis | PRKDC   |
| GeneCards | Ulcerative Colitis | CXCR4   |
| GeneCards | Ulcerative Colitis | CYBB    |
| GeneCards | Ulcerative Colitis | POMC    |
| GeneCards | Ulcerative Colitis | PON1    |
| GeneCards | Ulcerative Colitis | CDC42   |
| GeneCards | Ulcerative Colitis | TRA     |
| GeneCards | Ulcerative Colitis | TMSB4X  |
| GeneCards | Ulcerative Colitis | JAK3    |
| GeneCards | Ulcerative Colitis | CYP2E1  |
| GeneCards | Ulcerative Colitis | KIF21B  |
| GeneCards | Ulcerative Colitis | BUB1B   |
| GeneCards | Ulcerative Colitis | BUB1    |
| GeneCards | Ulcerative Colitis | PTPRJ   |
| GeneCards | Ulcerative Colitis | DMD     |
| GeneCards | Ulcerative Colitis | DLC1    |
| GeneCards | Ulcerative Colitis | FZD3    |
| GeneCards | Ulcerative Colitis | FLCN    |
| GeneCards | Ulcerative Colitis | PMS1    |
| GeneCards | Ulcerative Colitis | MCC     |
| GeneCards | Ulcerative Colitis | RAD54B  |
| GeneCards | Ulcerative Colitis | SLC9A9  |
| GeneCards | Ulcerative Colitis | PKHD1   |
| GeneCards | Ulcerative Colitis | AMER1   |
| GeneCards | Ulcerative Colitis | MT-ND1  |

|           |                    |          |
|-----------|--------------------|----------|
| GeneCards | Ulcerative Colitis | C11orf65 |
| GeneCards | Ulcerative Colitis | MIR34B   |
| GeneCards | Ulcerative Colitis | MIR100   |
| GeneCards | Ulcerative Colitis | MIR342   |
| GeneCards | Ulcerative Colitis | CRCS11   |
| GeneCards | Ulcerative Colitis | CRCS2    |
| GeneCards | Ulcerative Colitis | CRCS5    |
| GeneCards | Ulcerative Colitis | CRCS6    |
| GeneCards | Ulcerative Colitis | CRCS9    |
| GeneCards | Ulcerative Colitis | IBD15    |
| GeneCards | Ulcerative Colitis | IBD18    |
| GeneCards | Ulcerative Colitis | CRCS7    |
| GeneCards | Ulcerative Colitis | CRCS8    |
| GeneCards | Ulcerative Colitis | IBD11    |
| GeneCards | Ulcerative Colitis | IBD12    |
| GeneCards | Ulcerative Colitis | IBD16    |
| GeneCards | Ulcerative Colitis | IBD20    |
| GeneCards | Ulcerative Colitis | IBD22    |
| GeneCards | Ulcerative Colitis | IBD23    |
| GeneCards | Ulcerative Colitis | IBD24    |
| GeneCards | Ulcerative Colitis | IBD26    |
| GeneCards | Ulcerative Colitis | IBD27    |
| GeneCards | Ulcerative Colitis | MMP8     |
| GeneCards | Ulcerative Colitis | F13A1    |
| GeneCards | Ulcerative Colitis | RFXANK   |
| GeneCards | Ulcerative Colitis | RFXAP    |
| GeneCards | Ulcerative Colitis | PARP1    |
| GeneCards | Ulcerative Colitis | RAC1     |
| GeneCards | Ulcerative Colitis | CXCL9    |
| GeneCards | Ulcerative Colitis | FOS      |
| GeneCards | Ulcerative Colitis | GZMB     |
| GeneCards | Ulcerative Colitis | BSN      |
| GeneCards | Ulcerative Colitis | TIMP2    |
| GeneCards | Ulcerative Colitis | PIK3CD   |
| GeneCards | Ulcerative Colitis | BMP6     |
| GeneCards | Ulcerative Colitis | NOS3     |
| GeneCards | Ulcerative Colitis | FFAR2    |
| GeneCards | Ulcerative Colitis | IFNA1    |
| GeneCards | Ulcerative Colitis | SMAD2    |
| GeneCards | Ulcerative Colitis | TNFRSF6B |
| GeneCards | Ulcerative Colitis | PSMB9    |
| GeneCards | Ulcerative Colitis | DPYD     |
| GeneCards | Ulcerative Colitis | USB1     |
| GeneCards | Ulcerative Colitis | EBI3     |

|           |                    |            |
|-----------|--------------------|------------|
| GeneCards | Ulcerative Colitis | NAT1       |
| GeneCards | Ulcerative Colitis | IGF1R      |
| GeneCards | Ulcerative Colitis | ETS1       |
| GeneCards | Ulcerative Colitis | MAPK14     |
| GeneCards | Ulcerative Colitis | LEPR       |
| GeneCards | Ulcerative Colitis | CCKBR      |
| GeneCards | Ulcerative Colitis | MIR196B    |
| GeneCards | Ulcerative Colitis | IL4R       |
| GeneCards | Ulcerative Colitis | MIR210     |
| GeneCards | Ulcerative Colitis | CX3CR1     |
| GeneCards | Ulcerative Colitis | HAVCR2     |
| GeneCards | Ulcerative Colitis | LGALS1     |
| GeneCards | Ulcerative Colitis | IGHE       |
| GeneCards | Ulcerative Colitis | DST        |
| GeneCards | Ulcerative Colitis | DLD        |
| GeneCards | Ulcerative Colitis | IL17REL    |
| GeneCards | Ulcerative Colitis | NOTCH4     |
| GeneCards | Ulcerative Colitis | GREM1      |
| GeneCards | Ulcerative Colitis | LBR        |
| GeneCards | Ulcerative Colitis | AHR        |
| GeneCards | Ulcerative Colitis | C3         |
| GeneCards | Ulcerative Colitis | NLRP6      |
| GeneCards | Ulcerative Colitis | BIRC5      |
| GeneCards | Ulcerative Colitis | CD209      |
| GeneCards | Ulcerative Colitis | ACTA2      |
| GeneCards | Ulcerative Colitis | HLA-DPA1   |
| GeneCards | Ulcerative Colitis | KLRK1      |
| GeneCards | Ulcerative Colitis | SLIT2      |
| GeneCards | Ulcerative Colitis | IL6ST      |
| GeneCards | Ulcerative Colitis | DNASE1     |
| GeneCards | Ulcerative Colitis | CASR       |
| GeneCards | Ulcerative Colitis | IL2RB      |
| GeneCards | Ulcerative Colitis | CASP8      |
| GeneCards | Ulcerative Colitis | PLAUR      |
| GeneCards | Ulcerative Colitis | CCL7       |
| GeneCards | Ulcerative Colitis | CDKN2B-AS1 |
| GeneCards | Ulcerative Colitis | CAMP       |
| GeneCards | Ulcerative Colitis | DEFA6      |
| GeneCards | Ulcerative Colitis | ANTXR2     |
| GeneCards | Ulcerative Colitis | MIR200C    |
| GeneCards | Ulcerative Colitis | FGF19      |
| GeneCards | Ulcerative Colitis | SLC44A4    |
| GeneCards | Ulcerative Colitis | SARM1      |
| GeneCards | Ulcerative Colitis | WNT4       |

|           |                    |           |
|-----------|--------------------|-----------|
| GeneCards | Ulcerative Colitis | MYB       |
| GeneCards | Ulcerative Colitis | CYP1B1    |
| GeneCards | Ulcerative Colitis | CHI3L1    |
| GeneCards | Ulcerative Colitis | LYST      |
| GeneCards | Ulcerative Colitis | BIRC3     |
| GeneCards | Ulcerative Colitis | SERPINF2  |
| GeneCards | Ulcerative Colitis | MIR125A   |
| GeneCards | Ulcerative Colitis | LINC01475 |
| GeneCards | Ulcerative Colitis | HBEGF     |
| GeneCards | Ulcerative Colitis | HSPA1L    |
| GeneCards | Ulcerative Colitis | CDKAL1    |
| GeneCards | Ulcerative Colitis | ERCC1     |
| GeneCards | Ulcerative Colitis | ZPBP2     |
| GeneCards | Ulcerative Colitis | ITGAE     |
| GeneCards | Ulcerative Colitis | TLR8      |
| GeneCards | Ulcerative Colitis | TNFRSF14  |
| GeneCards | Ulcerative Colitis | SLC17A5   |
| GeneCards | Ulcerative Colitis | TRAF3IP2  |
| GeneCards | Ulcerative Colitis | CHAT      |
| GeneCards | Ulcerative Colitis | NOX1      |
| GeneCards | Ulcerative Colitis | IL1RL1    |
| GeneCards | Ulcerative Colitis | HLA-DRB5  |
| GeneCards | Ulcerative Colitis | APOE      |
| GeneCards | Ulcerative Colitis | GOT1      |
| GeneCards | Ulcerative Colitis | GPT       |
| GeneCards | Ulcerative Colitis | MIR24-1   |
| GeneCards | Ulcerative Colitis | FFAR3     |
| GeneCards | Ulcerative Colitis | AMACR     |
| GeneCards | Ulcerative Colitis | NCAM1     |
| GeneCards | Ulcerative Colitis | LYZ       |
| GeneCards | Ulcerative Colitis | SP140     |
| GeneCards | Ulcerative Colitis | CCL26     |
| GeneCards | Ulcerative Colitis | KRT19     |
| GeneCards | Ulcerative Colitis | RNASEH2C  |
| GeneCards | Ulcerative Colitis | IL18BP    |
| GeneCards | Ulcerative Colitis | IL18R1    |
| GeneCards | Ulcerative Colitis | COL14A1   |
| GeneCards | Ulcerative Colitis | B2M       |
| GeneCards | Ulcerative Colitis | TXN       |
| GeneCards | Ulcerative Colitis | G6PC3     |
| GeneCards | Ulcerative Colitis | DNAH8     |
| GeneCards | Ulcerative Colitis | CLDN5     |
| GeneCards | Ulcerative Colitis | KNG1      |
| GeneCards | Ulcerative Colitis | MMP10     |

|           |                    |          |
|-----------|--------------------|----------|
| GeneCards | Ulcerative Colitis | HSPA1B   |
| GeneCards | Ulcerative Colitis | ARPC2    |
| GeneCards | Ulcerative Colitis | PTGER3   |
| GeneCards | Ulcerative Colitis | PSMB8    |
| GeneCards | Ulcerative Colitis | NOTCH2   |
| GeneCards | Ulcerative Colitis | CLDN1    |
| GeneCards | Ulcerative Colitis | MIR642A  |
| GeneCards | Ulcerative Colitis | PRKD1    |
| GeneCards | Ulcerative Colitis | IL9      |
| GeneCards | Ulcerative Colitis | ADAD1    |
| GeneCards | Ulcerative Colitis | CTSD     |
| GeneCards | Ulcerative Colitis | MST1R    |
| GeneCards | Ulcerative Colitis | TRG      |
| GeneCards | Ulcerative Colitis | MIR142   |
| GeneCards | Ulcerative Colitis | TNFRSF4  |
| GeneCards | Ulcerative Colitis | ENO1     |
| GeneCards | Ulcerative Colitis | CD27-AS1 |
| GeneCards | Ulcerative Colitis | IL21-AS1 |
| GeneCards | Ulcerative Colitis | COL17A1  |
| GeneCards | Ulcerative Colitis | DOCK8    |
| GeneCards | Ulcerative Colitis | NFKBIL1  |
| GeneCards | Ulcerative Colitis | HDAC9    |
| GeneCards | Ulcerative Colitis | STAT5B   |
| GeneCards | Ulcerative Colitis | H2AC18   |
| GeneCards | Ulcerative Colitis | CD59     |
| GeneCards | Ulcerative Colitis | GPX2     |
| GeneCards | Ulcerative Colitis | GSR      |
| GeneCards | Ulcerative Colitis | CTH      |
| GeneCards | Ulcerative Colitis | KRT8     |
| GeneCards | Ulcerative Colitis | AREG     |
| GeneCards | Ulcerative Colitis | SCG2     |
| GeneCards | Ulcerative Colitis | ITLN1    |
| GeneCards | Ulcerative Colitis | TTC37    |
| GeneCards | Ulcerative Colitis | TNFSF10  |
| GeneCards | Ulcerative Colitis | F12      |
| GeneCards | Ulcerative Colitis | SMURF1   |
| GeneCards | Ulcerative Colitis | TP73     |
| GeneCards | Ulcerative Colitis | BANK1    |
| GeneCards | Ulcerative Colitis | PCNA     |
| GeneCards | Ulcerative Colitis | CFTR     |
| GeneCards | Ulcerative Colitis | ADAM17   |
| GeneCards | Ulcerative Colitis | MIR598   |
| GeneCards | Ulcerative Colitis | MIR214   |
| GeneCards | Ulcerative Colitis | CHGB     |

|           |                    |           |
|-----------|--------------------|-----------|
| GeneCards | Ulcerative Colitis | CARD6     |
| GeneCards | Ulcerative Colitis | ERAP2     |
| GeneCards | Ulcerative Colitis | IL1RL2    |
| GeneCards | Ulcerative Colitis | EPHB4     |
| GeneCards | Ulcerative Colitis | HNMT      |
| GeneCards | Ulcerative Colitis | MIR193A   |
| GeneCards | Ulcerative Colitis | IL1R2     |
| GeneCards | Ulcerative Colitis | DPF2      |
| GeneCards | Ulcerative Colitis | PTX3      |
| GeneCards | Ulcerative Colitis | GNA12     |
| GeneCards | Ulcerative Colitis | ACHE      |
| GeneCards | Ulcerative Colitis | CEP72     |
| GeneCards | Ulcerative Colitis | KIR3DL1   |
| GeneCards | Ulcerative Colitis | MIR195    |
| GeneCards | Ulcerative Colitis | FLT1      |
| GeneCards | Ulcerative Colitis | PIGR      |
| GeneCards | Ulcerative Colitis | MDM2      |
| GeneCards | Ulcerative Colitis | FOSL1     |
| GeneCards | Ulcerative Colitis | MIR222    |
| GeneCards | Ulcerative Colitis | ARPC1B    |
| GeneCards | Ulcerative Colitis | MMP14     |
| GeneCards | Ulcerative Colitis | FGF23     |
| GeneCards | Ulcerative Colitis | COL1A1    |
| GeneCards | Ulcerative Colitis | CTSB      |
| GeneCards | Ulcerative Colitis | TOLLIP    |
| GeneCards | Ulcerative Colitis | NR1H2     |
| GeneCards | Ulcerative Colitis | TPI1      |
| GeneCards | Ulcerative Colitis | KRT18     |
| GeneCards | Ulcerative Colitis | ENG       |
| GeneCards | Ulcerative Colitis | MIR199A1  |
| GeneCards | Ulcerative Colitis | BCL2L11   |
| GeneCards | Ulcerative Colitis | KEAP1     |
| GeneCards | Ulcerative Colitis | MIR31     |
| GeneCards | Ulcerative Colitis | IGSF6     |
| GeneCards | Ulcerative Colitis | SNAI1     |
| GeneCards | Ulcerative Colitis | MIR200B   |
| GeneCards | Ulcerative Colitis | CDH23     |
| GeneCards | Ulcerative Colitis | TLR7      |
| GeneCards | Ulcerative Colitis | CD163     |
| GeneCards | Ulcerative Colitis | CCL4      |
| GeneCards | Ulcerative Colitis | LSP1      |
| GeneCards | Ulcerative Colitis | TNFRSF10B |
| GeneCards | Ulcerative Colitis | CEACAM6   |
| GeneCards | Ulcerative Colitis | PRG2      |

|           |                    |         |
|-----------|--------------------|---------|
| GeneCards | Ulcerative Colitis | GPBAR1  |
| GeneCards | Ulcerative Colitis | TRAF6   |
| GeneCards | Ulcerative Colitis | LITAF   |
| GeneCards | Ulcerative Colitis | CHUK    |
| GeneCards | Ulcerative Colitis | ICAM2   |
| GeneCards | Ulcerative Colitis | KLF6    |
| GeneCards | Ulcerative Colitis | BVES    |
| GeneCards | Ulcerative Colitis | MIR144  |
| GeneCards | Ulcerative Colitis | FUT3    |
| GeneCards | Ulcerative Colitis | MTHFD1  |
| GeneCards | Ulcerative Colitis | ANXA1   |
| GeneCards | Ulcerative Colitis | CD34    |
| GeneCards | Ulcerative Colitis | HLA-T   |
| GeneCards | Ulcerative Colitis | CCHCR1  |
| GeneCards | Ulcerative Colitis | TWIST1  |
| GeneCards | Ulcerative Colitis | CD69    |
| GeneCards | Ulcerative Colitis | MIR221  |
| GeneCards | Ulcerative Colitis | CFLAR   |
| GeneCards | Ulcerative Colitis | BLTP1   |
| GeneCards | Ulcerative Colitis | MALAT1  |
| GeneCards | Ulcerative Colitis | TNIP1   |
| GeneCards | Ulcerative Colitis | FLT4    |
| GeneCards | Ulcerative Colitis | SLC16A1 |
| GeneCards | Ulcerative Colitis | MIR3936 |
| GeneCards | Ulcerative Colitis | TLR10   |
| GeneCards | Ulcerative Colitis | RORC    |
| GeneCards | Ulcerative Colitis | SMARCA4 |
| GeneCards | Ulcerative Colitis | SLAMF1  |
| GeneCards | Ulcerative Colitis | CYCS    |
| GeneCards | Ulcerative Colitis | MIR150  |
| GeneCards | Ulcerative Colitis | TFRC    |
| GeneCards | Ulcerative Colitis | HSPB1   |
| GeneCards | Ulcerative Colitis | MTOR    |
| GeneCards | Ulcerative Colitis | MIR122  |
| GeneCards | Ulcerative Colitis | IKBKG   |
| GeneCards | Ulcerative Colitis | IKBKB   |
| GeneCards | Ulcerative Colitis | TNFSF4  |
| GeneCards | Ulcerative Colitis | CRHR2   |
| GeneCards | Ulcerative Colitis | ESR2    |
| GeneCards | Ulcerative Colitis | PARK7   |
| GeneCards | Ulcerative Colitis | USP12   |
| GeneCards | Ulcerative Colitis | MIR223  |
| GeneCards | Ulcerative Colitis | AIRE    |
| GeneCards | Ulcerative Colitis | EZH2    |

|           |                    |           |
|-----------|--------------------|-----------|
| GeneCards | Ulcerative Colitis | TPPP      |
| GeneCards | Ulcerative Colitis | FCGR2C    |
| GeneCards | Ulcerative Colitis | IL20      |
| GeneCards | Ulcerative Colitis | HPRT1     |
| GeneCards | Ulcerative Colitis | ANXA5     |
| GeneCards | Ulcerative Colitis | FHIT      |
| GeneCards | Ulcerative Colitis | HERC2     |
| GeneCards | Ulcerative Colitis | PADI4     |
| GeneCards | Ulcerative Colitis | BBC3      |
| GeneCards | Ulcerative Colitis | CD1A      |
| GeneCards | Ulcerative Colitis | DES       |
| GeneCards | Ulcerative Colitis | CCL25     |
| GeneCards | Ulcerative Colitis | NOTCH3    |
| GeneCards | Ulcerative Colitis | DRD2      |
| GeneCards | Ulcerative Colitis | CCL21     |
| GeneCards | Ulcerative Colitis | ALDH1A1   |
| GeneCards | Ulcerative Colitis | CLDN3     |
| GeneCards | Ulcerative Colitis | IL17RC    |
| GeneCards | Ulcerative Colitis | DAP       |
| GeneCards | Ulcerative Colitis | SLC15A1   |
| GeneCards | Ulcerative Colitis | ICOS      |
| GeneCards | Ulcerative Colitis | TGFBR2    |
| GeneCards | Ulcerative Colitis | ABCC2     |
| GeneCards | Ulcerative Colitis | ADAR      |
| GeneCards | Ulcerative Colitis | MIR424    |
| GeneCards | Ulcerative Colitis | MYD88     |
| GeneCards | Ulcerative Colitis | DNMT3B    |
| GeneCards | Ulcerative Colitis | ISG15     |
| GeneCards | Ulcerative Colitis | MTRR      |
| GeneCards | Ulcerative Colitis | TNFRSF11B |
| GeneCards | Ulcerative Colitis | TNFRSF18  |
| GeneCards | Ulcerative Colitis | F2R       |
| GeneCards | Ulcerative Colitis | TCF7L2    |
| GeneCards | Ulcerative Colitis | NRIP1     |
| GeneCards | Ulcerative Colitis | PRDM1     |
| GeneCards | Ulcerative Colitis | ANGPT1    |
| GeneCards | Ulcerative Colitis | SIRT1     |
| GeneCards | Ulcerative Colitis | CEACAM5   |
| GeneCards | Ulcerative Colitis | UGT1A6    |
| GeneCards | Ulcerative Colitis | CCL24     |
| GeneCards | Ulcerative Colitis | DPP4      |
| GeneCards | Ulcerative Colitis | PDE4A     |
| GeneCards | Ulcerative Colitis | SLC40A1   |
| GeneCards | Ulcerative Colitis | HSPA6     |



|           |                    |           |
|-----------|--------------------|-----------|
| GeneCards | Ulcerative Colitis | C1S       |
| GeneCards | Ulcerative Colitis | TNFRSF10A |
| GeneCards | Ulcerative Colitis | GSN       |
| GeneCards | Ulcerative Colitis | TRPV4     |
| GeneCards | Ulcerative Colitis | G6PD      |
| GeneCards | Ulcerative Colitis | APEX1     |
| GeneCards | Ulcerative Colitis | H2AX      |
| GeneCards | Ulcerative Colitis | C1R       |
| GeneCards | Ulcerative Colitis | ATF6      |
| GeneCards | Ulcerative Colitis | APEH      |
| GeneCards | Ulcerative Colitis | PTPRS     |
| GeneCards | Ulcerative Colitis | PLA2G7    |
| GeneCards | Ulcerative Colitis | BTK       |
| GeneCards | Ulcerative Colitis | GAPDH     |
| GeneCards | Ulcerative Colitis | MIR29A    |
| GeneCards | Ulcerative Colitis | PTCH1     |
| GeneCards | Ulcerative Colitis | LGALS4    |
| GeneCards | Ulcerative Colitis | SMARCB1   |
| GeneCards | Ulcerative Colitis | TLR1      |
| GeneCards | Ulcerative Colitis | CCL17     |
| GeneCards | Ulcerative Colitis | INSL4     |
| GeneCards | Ulcerative Colitis | IL2RG     |
| GeneCards | Ulcerative Colitis | SULT1A1   |
| GeneCards | Ulcerative Colitis | CLDN7     |
| GeneCards | Ulcerative Colitis | MAPK3     |
| GeneCards | Ulcerative Colitis | BLK       |
| GeneCards | Ulcerative Colitis | CLU       |
| GeneCards | Ulcerative Colitis | CCNA2     |
| GeneCards | Ulcerative Colitis | HSF2      |
| GeneCards | Ulcerative Colitis | OR5V1     |
| GeneCards | Ulcerative Colitis | NOS1      |
| GeneCards | Ulcerative Colitis | GPR12     |
| GeneCards | Ulcerative Colitis | MUC4      |
| GeneCards | Ulcerative Colitis | GPSM3     |
| GeneCards | Ulcerative Colitis | RB1       |
| GeneCards | Ulcerative Colitis | PARD3     |
| GeneCards | Ulcerative Colitis | ALDH2     |
| GeneCards | Ulcerative Colitis | GUCY2C    |
| GeneCards | Ulcerative Colitis | MAGI1     |
| GeneCards | Ulcerative Colitis | EWSR1     |
| GeneCards | Ulcerative Colitis | CRH       |
| GeneCards | Ulcerative Colitis | VIM       |
| GeneCards | Ulcerative Colitis | SBNO2     |
| GeneCards | Ulcerative Colitis | ENTPD1    |

|           |                    |          |
|-----------|--------------------|----------|
| GeneCards | Ulcerative Colitis | GJB6     |
| GeneCards | Ulcerative Colitis | MB       |
| GeneCards | Ulcerative Colitis | SERPINA4 |
| GeneCards | Ulcerative Colitis | EGR1     |
| GeneCards | Ulcerative Colitis | TDGF1    |
| GeneCards | Ulcerative Colitis | HSPA1A   |
| GeneCards | Ulcerative Colitis | PBX2     |
| GeneCards | Ulcerative Colitis | MIR106B  |
| GeneCards | Ulcerative Colitis | CDK4     |
| GeneCards | Ulcerative Colitis | GZMA     |
| GeneCards | Ulcerative Colitis | MIR15A   |
| GeneCards | Ulcerative Colitis | SHH      |
| GeneCards | Ulcerative Colitis | P4HA2    |
| GeneCards | Ulcerative Colitis | MMP12    |
| GeneCards | Ulcerative Colitis | WASHC5   |
| GeneCards | Ulcerative Colitis | TAGLN    |
| GeneCards | Ulcerative Colitis | CD24     |
| GeneCards | Ulcerative Colitis | RECQL4   |
| GeneCards | Ulcerative Colitis | CDK2     |
| GeneCards | Ulcerative Colitis | LRP6     |
| GeneCards | Ulcerative Colitis | SI       |
| GeneCards | Ulcerative Colitis | TYMS     |
| GeneCards | Ulcerative Colitis | ENO2     |
| GeneCards | Ulcerative Colitis | FCAR     |
| GeneCards | Ulcerative Colitis | TFAP2A   |
| GeneCards | Ulcerative Colitis | TNFSF13B |
| GeneCards | Ulcerative Colitis | INPP5E   |
| GeneCards | Ulcerative Colitis | UBE2L3   |
| GeneCards | Ulcerative Colitis | JAZF1    |
| GeneCards | Ulcerative Colitis | SCYL1    |
| GeneCards | Ulcerative Colitis | DAB2     |
| GeneCards | Ulcerative Colitis | S100B    |
| GeneCards | Ulcerative Colitis | MIR27A   |
| GeneCards | Ulcerative Colitis | MIR19A   |
| GeneCards | Ulcerative Colitis | MAP2K1   |
| GeneCards | Ulcerative Colitis | DSP      |
| GeneCards | Ulcerative Colitis | IL13RA2  |
| GeneCards | Ulcerative Colitis | AP3B1    |
| GeneCards | Ulcerative Colitis | CASP9    |
| GeneCards | Ulcerative Colitis | PI3      |
| GeneCards | Ulcerative Colitis | NUP210   |
| GeneCards | Ulcerative Colitis | POU5F1   |
| GeneCards | Ulcerative Colitis | CLIC1    |
| GeneCards | Ulcerative Colitis | ERN1     |

|           |                    |          |
|-----------|--------------------|----------|
| GeneCards | Ulcerative Colitis | HSP90AA1 |
| GeneCards | Ulcerative Colitis | BSG      |
| GeneCards | Ulcerative Colitis | FLG      |
| GeneCards | Ulcerative Colitis | HLA-DMA  |
| GeneCards | Ulcerative Colitis | CTC1     |
| GeneCards | Ulcerative Colitis | IL6-AS1  |
| GeneCards | Ulcerative Colitis | GTF2I    |
| GeneCards | Ulcerative Colitis | FABP2    |
| GeneCards | Ulcerative Colitis | VTN      |
| GeneCards | Ulcerative Colitis | TGFB3    |
| GeneCards | Ulcerative Colitis | TF       |
| GeneCards | Ulcerative Colitis | SOX4     |
| GeneCards | Ulcerative Colitis | PTGER2   |
| GeneCards | Ulcerative Colitis | MIR20A   |
| GeneCards | Ulcerative Colitis | SFTPD    |
| GeneCards | Ulcerative Colitis | LAMP1    |
| GeneCards | Ulcerative Colitis | TNPO3    |
| GeneCards | Ulcerative Colitis | LST1     |
| GeneCards | Ulcerative Colitis | WASL     |
| GeneCards | Ulcerative Colitis | MIR196A1 |
| GeneCards | Ulcerative Colitis | UCN2     |
| GeneCards | Ulcerative Colitis | GCKR     |
| GeneCards | Ulcerative Colitis | KPNA7    |
| GeneCards | Ulcerative Colitis | DAPK1    |
| GeneCards | Ulcerative Colitis | CALR     |
| GeneCards | Ulcerative Colitis | MYH11    |
| GeneCards | Ulcerative Colitis | PPIG     |
| GeneCards | Ulcerative Colitis | PPARA    |
| GeneCards | Ulcerative Colitis | NPL      |
| GeneCards | Ulcerative Colitis | PPM1L    |
| GeneCards | Ulcerative Colitis | ADGRE3   |
| GeneCards | Ulcerative Colitis | HOXA13   |
| GeneCards | Ulcerative Colitis | RAB27A   |
| GeneCards | Ulcerative Colitis | MME      |
| GeneCards | Ulcerative Colitis | IFITM3   |
| GeneCards | Ulcerative Colitis | RPL39P28 |
| GeneCards | Ulcerative Colitis | FMNL2    |
| GeneCards | Ulcerative Colitis | IL16     |
| GeneCards | Ulcerative Colitis | GPD2     |
| GeneCards | Ulcerative Colitis | CRHR1    |
| GeneCards | Ulcerative Colitis | RSPO1    |
| GeneCards | Ulcerative Colitis | TLR6     |
| GeneCards | Ulcerative Colitis | LGALS9   |
| GeneCards | Ulcerative Colitis | EPHX1    |

|           |                    |          |
|-----------|--------------------|----------|
| GeneCards | Ulcerative Colitis | NORAD    |
| GeneCards | Ulcerative Colitis | MDH2     |
| GeneCards | Ulcerative Colitis | ALOX12   |
| GeneCards | Ulcerative Colitis | WASHC4   |
| GeneCards | Ulcerative Colitis | IFNB1    |
| GeneCards | Ulcerative Colitis | NCF2     |
| GeneCards | Ulcerative Colitis | LPL      |
| GeneCards | Ulcerative Colitis | RPS14P1  |
| GeneCards | Ulcerative Colitis | TSLP     |
| GeneCards | Ulcerative Colitis | FADD     |
| GeneCards | Ulcerative Colitis | TNFRSF8  |
| GeneCards | Ulcerative Colitis | GMPPB    |
| GeneCards | Ulcerative Colitis | RAC3     |
| GeneCards | Ulcerative Colitis | MIR499A  |
| GeneCards | Ulcerative Colitis | TNFRSF9  |
| GeneCards | Ulcerative Colitis | ZGPAT    |
| GeneCards | Ulcerative Colitis | HSPG2    |
| GeneCards | Ulcerative Colitis | IL12RB1  |
| GeneCards | Ulcerative Colitis | SAG      |
| GeneCards | Ulcerative Colitis | JRKL     |
| GeneCards | Ulcerative Colitis | MIR139   |
| GeneCards | Ulcerative Colitis | GTF2H4   |
| GeneCards | Ulcerative Colitis | RIPK3    |
| GeneCards | Ulcerative Colitis | PHB1     |
| GeneCards | Ulcerative Colitis | BIRC2    |
| GeneCards | Ulcerative Colitis | SNAI2    |
| GeneCards | Ulcerative Colitis | MIR93    |
| GeneCards | Ulcerative Colitis | MAPK8    |
| GeneCards | Ulcerative Colitis | VIL1     |
| GeneCards | Ulcerative Colitis | SLC19A1  |
| GeneCards | Ulcerative Colitis | UBE4A    |
| GeneCards | Ulcerative Colitis | ANGPTL4  |
| GeneCards | Ulcerative Colitis | PLK1     |
| GeneCards | Ulcerative Colitis | SLC22A23 |
| GeneCards | Ulcerative Colitis | MIR15B   |
| GeneCards | Ulcerative Colitis | PERP     |
| GeneCards | Ulcerative Colitis | MUC3B    |
| GeneCards | Ulcerative Colitis | REG1A    |
| GeneCards | Ulcerative Colitis | MIR124-1 |
| GeneCards | Ulcerative Colitis | SERPINH1 |
| GeneCards | Ulcerative Colitis | IKZF3    |
| GeneCards | Ulcerative Colitis | PLCH2    |
| GeneCards | Ulcerative Colitis | MMEL1    |
| GeneCards | Ulcerative Colitis | SLC2A4RG |

|           |                    |           |
|-----------|--------------------|-----------|
| GeneCards | Ulcerative Colitis | TNFSF8    |
| GeneCards | Ulcerative Colitis | NXPE1     |
| GeneCards | Ulcerative Colitis | ENTR1     |
| GeneCards | Ulcerative Colitis | GATD3     |
| GeneCards | Ulcerative Colitis | LINC00598 |
| GeneCards | Ulcerative Colitis | PITX1-AS1 |
| GeneCards | Ulcerative Colitis | FGFR1     |
| GeneCards | Ulcerative Colitis | MDK       |
| GeneCards | Ulcerative Colitis | OCLN      |
| GeneCards | Ulcerative Colitis | PRRC2A    |
| GeneCards | Ulcerative Colitis | CFH       |
| GeneCards | Ulcerative Colitis | TH        |
| GeneCards | Ulcerative Colitis | PROCR     |
| GeneCards | Ulcerative Colitis | CCNB1     |
| GeneCards | Ulcerative Colitis | BECN1     |
| GeneCards | Ulcerative Colitis | EHMT2     |
| GeneCards | Ulcerative Colitis | MIR149    |
| GeneCards | Ulcerative Colitis | LCK       |
| GeneCards | Ulcerative Colitis | HMGB2     |
| GeneCards | Ulcerative Colitis | RHOD      |
| GeneCards | Ulcerative Colitis | SEC16A    |
| GeneCards | Ulcerative Colitis | LIFR      |
| GeneCards | Ulcerative Colitis | XBP1      |
| GeneCards | Ulcerative Colitis | MSH5      |
| GeneCards | Ulcerative Colitis | CCN4      |
| GeneCards | Ulcerative Colitis | TIAL1     |
| GeneCards | Ulcerative Colitis | KCP       |
| GeneCards | Ulcerative Colitis | MROH3P    |
| GeneCards | Ulcerative Colitis | ID2       |
| GeneCards | Ulcerative Colitis | CYP21A2   |
| GeneCards | Ulcerative Colitis | DNAL4     |
| GeneCards | Ulcerative Colitis | USP4      |
| GeneCards | Ulcerative Colitis | SETD2     |
| GeneCards | Ulcerative Colitis | SLC34A1   |
| GeneCards | Ulcerative Colitis | CYP27B1   |
| GeneCards | Ulcerative Colitis | TYMP      |
| GeneCards | Ulcerative Colitis | FOXF1     |
| GeneCards | Ulcerative Colitis | ERBB4     |
| GeneCards | Ulcerative Colitis | ACKR2     |
| GeneCards | Ulcerative Colitis | NRP1      |
| GeneCards | Ulcerative Colitis | YAP1      |
| GeneCards | Ulcerative Colitis | CD244     |
| GeneCards | Ulcerative Colitis | MIR483    |
| GeneCards | Ulcerative Colitis | MIR25     |

|           |                    |             |
|-----------|--------------------|-------------|
| GeneCards | Ulcerative Colitis | PLA2G4F     |
| GeneCards | Ulcerative Colitis | LRRC57      |
| GeneCards | Ulcerative Colitis | METTL9      |
| GeneCards | Ulcerative Colitis | TMEM201     |
| GeneCards | Ulcerative Colitis | IGSF6-DREV1 |
| GeneCards | Ulcerative Colitis | ALOX15      |
| GeneCards | Ulcerative Colitis | AICDA       |
| GeneCards | Ulcerative Colitis | ELAVL1      |
| GeneCards | Ulcerative Colitis | MIR320A     |
| GeneCards | Ulcerative Colitis | DCLK1       |
| GeneCards | Ulcerative Colitis | GPR65       |
| GeneCards | Ulcerative Colitis | KLF4        |
| GeneCards | Ulcerative Colitis | MIR182      |
| GeneCards | Ulcerative Colitis | AFP         |
| GeneCards | Ulcerative Colitis | MAPK1       |
| GeneCards | Ulcerative Colitis | U2AF1       |
| GeneCards | Ulcerative Colitis | PFKFB4      |
| GeneCards | Ulcerative Colitis | IP6K1       |
| GeneCards | Ulcerative Colitis | IP6K2       |
| GeneCards | Ulcerative Colitis | RARRES2     |
| GeneCards | Ulcerative Colitis | F2RL3       |
| GeneCards | Ulcerative Colitis | FASN        |
| GeneCards | Ulcerative Colitis | TYR         |
| GeneCards | Ulcerative Colitis | KITLG       |
| GeneCards | Ulcerative Colitis | KLK3        |
| GeneCards | Ulcerative Colitis | SP1         |
| GeneCards | Ulcerative Colitis | CSN1S1      |
| GeneCards | Ulcerative Colitis | NLRC4       |
| GeneCards | Ulcerative Colitis | RPS6KB1     |
| GeneCards | Ulcerative Colitis | GLI1        |
| GeneCards | Ulcerative Colitis | MEG3        |
| GeneCards | Ulcerative Colitis | CCR4        |
| GeneCards | Ulcerative Colitis | SHC1        |
| GeneCards | Ulcerative Colitis | S1PR1       |
| GeneCards | Ulcerative Colitis | GDF15       |
| GeneCards | Ulcerative Colitis | TEP1        |
| GeneCards | Ulcerative Colitis | MAGI2       |
| GeneCards | Ulcerative Colitis | HSPA8       |
| GeneCards | Ulcerative Colitis | FLOT1       |
| GeneCards | Ulcerative Colitis | PROM1       |
| GeneCards | Ulcerative Colitis | SLC5A8      |
| GeneCards | Ulcerative Colitis | CREB1       |
| GeneCards | Ulcerative Colitis | SYP         |
| GeneCards | Ulcerative Colitis | MLXIPL      |

|           |                    |              |
|-----------|--------------------|--------------|
| GeneCards | Ulcerative Colitis | TNFRSF25     |
| GeneCards | Ulcerative Colitis | HAMP         |
| GeneCards | Ulcerative Colitis | HPSE         |
| GeneCards | Ulcerative Colitis | TGFBR1       |
| GeneCards | Ulcerative Colitis | LIF          |
| GeneCards | Ulcerative Colitis | NF1          |
| GeneCards | Ulcerative Colitis | FKBP5        |
| GeneCards | Ulcerative Colitis | FKBP15       |
| GeneCards | Ulcerative Colitis | SPARC        |
| GeneCards | Ulcerative Colitis | DAXX         |
| GeneCards | Ulcerative Colitis | MIR378A      |
| GeneCards | Ulcerative Colitis | MIR224       |
| GeneCards | Ulcerative Colitis | COX5A        |
| GeneCards | Ulcerative Colitis | REG3A        |
| GeneCards | Ulcerative Colitis | MIR200A      |
| GeneCards | Ulcerative Colitis | G6PC1        |
| GeneCards | Ulcerative Colitis | GGT1         |
| GeneCards | Ulcerative Colitis | COL4A5       |
| GeneCards | Ulcerative Colitis | INSL5        |
| GeneCards | Ulcerative Colitis | FPR1         |
| GeneCards | Ulcerative Colitis | ITPA         |
| GeneCards | Ulcerative Colitis | PITX1        |
| GeneCards | Ulcerative Colitis | PNMT         |
| GeneCards | Ulcerative Colitis | UBA7         |
| GeneCards | Ulcerative Colitis | NKX3-1       |
| GeneCards | Ulcerative Colitis | UTS2         |
| GeneCards | Ulcerative Colitis | PIM3         |
| GeneCards | Ulcerative Colitis | SERINC3      |
| GeneCards | Ulcerative Colitis | OLIG3        |
| GeneCards | Ulcerative Colitis | SNAPC4       |
| GeneCards | Ulcerative Colitis | AAMP         |
| GeneCards | Ulcerative Colitis | EXOC3        |
| GeneCards | Ulcerative Colitis | STMN3        |
| GeneCards | Ulcerative Colitis | ZBTB46       |
| GeneCards | Ulcerative Colitis | AMIGO3       |
| GeneCards | Ulcerative Colitis | PRXL2B       |
| GeneCards | Ulcerative Colitis | LOC100996583 |
| GeneCards | Ulcerative Colitis | HSD11B2      |
| GeneCards | Ulcerative Colitis | NFKBIZ       |
| GeneCards | Ulcerative Colitis | TUG1         |
| GeneCards | Ulcerative Colitis | HEY2         |
| GeneCards | Ulcerative Colitis | EXO1         |
| GeneCards | Ulcerative Colitis | CCR7         |
| GeneCards | Ulcerative Colitis | IDH2         |

|           |                    |           |
|-----------|--------------------|-----------|
| GeneCards | Ulcerative Colitis | TRIM21    |
| GeneCards | Ulcerative Colitis | ADCY10    |
| GeneCards | Ulcerative Colitis | MRC1      |
| GeneCards | Ulcerative Colitis | PTPRO     |
| GeneCards | Ulcerative Colitis | KRT15     |
| GeneCards | Ulcerative Colitis | FOXO3     |
| GeneCards | Ulcerative Colitis | PKM       |
| GeneCards | Ulcerative Colitis | IL25      |
| GeneCards | Ulcerative Colitis | AK2       |
| GeneCards | Ulcerative Colitis | ADRA2A    |
| GeneCards | Ulcerative Colitis | IER3      |
| GeneCards | Ulcerative Colitis | MIR196A2  |
| GeneCards | Ulcerative Colitis | TRIM39    |
| GeneCards | Ulcerative Colitis | DVL1      |
| GeneCards | Ulcerative Colitis | WNT2      |
| GeneCards | Ulcerative Colitis | HCAR2     |
| GeneCards | Ulcerative Colitis | EPB42     |
| GeneCards | Ulcerative Colitis | MIR106A   |
| GeneCards | Ulcerative Colitis | RCL1      |
| GeneCards | Ulcerative Colitis | BTRC      |
| GeneCards | Ulcerative Colitis | ITGA5     |
| GeneCards | Ulcerative Colitis | IGFBP3    |
| GeneCards | Ulcerative Colitis | HDGF      |
| GeneCards | Ulcerative Colitis | GAL       |
| GeneCards | Ulcerative Colitis | LINC00243 |
| GeneCards | Ulcerative Colitis | SFRP2     |
| GeneCards | Ulcerative Colitis | TIMP3     |
| GeneCards | Ulcerative Colitis | STK39     |
| GeneCards | Ulcerative Colitis | HSP90B1   |
| GeneCards | Ulcerative Colitis | NFKB2     |
| GeneCards | Ulcerative Colitis | IL7       |
| GeneCards | Ulcerative Colitis | TNFSF12   |
| GeneCards | Ulcerative Colitis | TBXT      |
| GeneCards | Ulcerative Colitis | EED       |
| GeneCards | Ulcerative Colitis | RRM2B     |
| GeneCards | Ulcerative Colitis | DUOXA2    |
| GeneCards | Ulcerative Colitis | RUNX1     |
| GeneCards | Ulcerative Colitis | PSORS1C1  |
| GeneCards | Ulcerative Colitis | CYP4F3    |
| GeneCards | Ulcerative Colitis | REV3L     |
| GeneCards | Ulcerative Colitis | BMI1      |
| GeneCards | Ulcerative Colitis | DDR1      |
| GeneCards | Ulcerative Colitis | CD83      |
| GeneCards | Ulcerative Colitis | LYRM4     |



|           |                    |           |
|-----------|--------------------|-----------|
| GeneCards | Ulcerative Colitis | MUC19     |
| GeneCards | Ulcerative Colitis | MIR16-1   |
| GeneCards | Ulcerative Colitis | MIR24-2   |
| GeneCards | Ulcerative Colitis | IDH1      |
| GeneCards | Ulcerative Colitis | ANGPT2    |
| GeneCards | Ulcerative Colitis | IL15RA    |
| GeneCards | Ulcerative Colitis | UGT1A1    |
| GeneCards | Ulcerative Colitis | TRIM31    |
| GeneCards | Ulcerative Colitis | MAD2L1    |
| GeneCards | Ulcerative Colitis | TNFRSF10D |
| GeneCards | Ulcerative Colitis | GUCA2A    |
| GeneCards | Ulcerative Colitis | FLII      |
| GeneCards | Ulcerative Colitis | ADCY3     |
| GeneCards | Ulcerative Colitis | MSH3      |
| GeneCards | Ulcerative Colitis | ZMIZ1     |
| GeneCards | Ulcerative Colitis | CA2       |
| GeneCards | Ulcerative Colitis | IGLL5     |
| GeneCards | Ulcerative Colitis | CACNA2D1  |
| GeneCards | Ulcerative Colitis | VAR52     |
| GeneCards | Ulcerative Colitis | NCAPD2    |
| GeneCards | Ulcerative Colitis | COL13A1   |
| GeneCards | Ulcerative Colitis | ACTR3B    |
| GeneCards | Ulcerative Colitis | CPXM2     |
| GeneCards | Ulcerative Colitis | CAVIN1    |
| GeneCards | Ulcerative Colitis | CALHM6    |
| GeneCards | Ulcerative Colitis | MIR26B    |
| GeneCards | Ulcerative Colitis | HCG9      |
| GeneCards | Ulcerative Colitis | HCG26     |
| GeneCards | Ulcerative Colitis | MIR588    |
| GeneCards | Ulcerative Colitis | CD1D      |
| GeneCards | Ulcerative Colitis | HLA-DRB3  |
| GeneCards | Ulcerative Colitis | FLVCR1    |
| GeneCards | Ulcerative Colitis | PTGES     |
| GeneCards | Ulcerative Colitis | PPP1R14A  |
| GeneCards | Ulcerative Colitis | HSD11B1   |
| GeneCards | Ulcerative Colitis | MIR30A    |
| GeneCards | Ulcerative Colitis | NAGLU     |
| GeneCards | Ulcerative Colitis | MIR148A   |
| GeneCards | Ulcerative Colitis | MECP2     |
| GeneCards | Ulcerative Colitis | BDKRB2    |
| GeneCards | Ulcerative Colitis | CADM2     |
| GeneCards | Ulcerative Colitis | AR        |
| GeneCards | Ulcerative Colitis | MIR206    |
| GeneCards | Ulcerative Colitis | LOX       |

|           |                    |          |
|-----------|--------------------|----------|
| GeneCards | Ulcerative Colitis | NPSR1    |
| GeneCards | Ulcerative Colitis | IGES     |
| GeneCards | Ulcerative Colitis | KHDRBS1  |
| GeneCards | Ulcerative Colitis | SYVN1    |
| GeneCards | Ulcerative Colitis | NR5A2    |
| GeneCards | Ulcerative Colitis | SULT1A2  |
| GeneCards | Ulcerative Colitis | RACK1    |
| GeneCards | Ulcerative Colitis | PRPF8    |
| GeneCards | Ulcerative Colitis | COG6     |
| GeneCards | Ulcerative Colitis | PLIN2    |
| GeneCards | Ulcerative Colitis | TRAF2    |
| GeneCards | Ulcerative Colitis | TGFB2    |
| GeneCards | Ulcerative Colitis | ACVRL1   |
| GeneCards | Ulcerative Colitis | CFHR1    |
| GeneCards | Ulcerative Colitis | TRB      |
| GeneCards | Ulcerative Colitis | MAF      |
| GeneCards | Ulcerative Colitis | F9       |
| GeneCards | Ulcerative Colitis | CHEK1    |
| GeneCards | Ulcerative Colitis | LRP5     |
| GeneCards | Ulcerative Colitis | PHLPP2   |
| GeneCards | Ulcerative Colitis | GUCA2B   |
| GeneCards | Ulcerative Colitis | PIK3CG   |
| GeneCards | Ulcerative Colitis | PROS1    |
| GeneCards | Ulcerative Colitis | GLP2R    |
| GeneCards | Ulcerative Colitis | IFNGR2   |
| GeneCards | Ulcerative Colitis | GPR183   |
| GeneCards | Ulcerative Colitis | RAB7B    |
| GeneCards | Ulcerative Colitis | VCL      |
| GeneCards | Ulcerative Colitis | MIR17    |
| GeneCards | Ulcerative Colitis | LY9      |
| GeneCards | Ulcerative Colitis | IL1RAP   |
| GeneCards | Ulcerative Colitis | GRB2     |
| GeneCards | Ulcerative Colitis | POSTN    |
| GeneCards | Ulcerative Colitis | MUC17    |
| GeneCards | Ulcerative Colitis | MIRLET7I |
| GeneCards | Ulcerative Colitis | PRDX1    |
| GeneCards | Ulcerative Colitis | DNMT3A   |
| GeneCards | Ulcerative Colitis | SLC18A3  |
| GeneCards | Ulcerative Colitis | BAP1     |
| GeneCards | Ulcerative Colitis | ALK      |
| GeneCards | Ulcerative Colitis | ADCYAP1  |
| GeneCards | Ulcerative Colitis | SAA4     |
| GeneCards | Ulcerative Colitis | DDX58    |
| GeneCards | Ulcerative Colitis | RASSF5   |

|           |                    |          |
|-----------|--------------------|----------|
| GeneCards | Ulcerative Colitis | ACTB     |
| GeneCards | Ulcerative Colitis | CHD4     |
| GeneCards | Ulcerative Colitis | IFNAR1   |
| GeneCards | Ulcerative Colitis | NT5E     |
| GeneCards | Ulcerative Colitis | NUDT15   |
| GeneCards | Ulcerative Colitis | NEU1     |
| GeneCards | Ulcerative Colitis | GJA1     |
| GeneCards | Ulcerative Colitis | CD2      |
| GeneCards | Ulcerative Colitis | AGT      |
| GeneCards | Ulcerative Colitis | CBL      |
| GeneCards | Ulcerative Colitis | MIR146B  |
| GeneCards | Ulcerative Colitis | ERCC2    |
| GeneCards | Ulcerative Colitis | HSPA5    |
| GeneCards | Ulcerative Colitis | CCL22    |
| GeneCards | Ulcerative Colitis | SRSF6    |
| GeneCards | Ulcerative Colitis | C1orf141 |
| GeneCards | Ulcerative Colitis | CPOX     |
| GeneCards | Ulcerative Colitis | KIR2DL3  |
| GeneCards | Ulcerative Colitis | P2RX3    |
| GeneCards | Ulcerative Colitis | TXNIP    |
| GeneCards | Ulcerative Colitis | CTTN     |
| GeneCards | Ulcerative Colitis | USP8     |
| GeneCards | Ulcerative Colitis | CALCOCO2 |
| GeneCards | Ulcerative Colitis | WNT16    |
| GeneCards | Ulcerative Colitis | CD19     |
| GeneCards | Ulcerative Colitis | HLA-DQA2 |
| GeneCards | Ulcerative Colitis | MAP2K2   |
| GeneCards | Ulcerative Colitis | ARG1     |
| GeneCards | Ulcerative Colitis | CXCL11   |
| GeneCards | Ulcerative Colitis | TGM2     |
| GeneCards | Ulcerative Colitis | GAS5     |
| GeneCards | Ulcerative Colitis | CBX1     |
| GeneCards | Ulcerative Colitis | NGFR     |
| GeneCards | Ulcerative Colitis | CIRBP    |
| GeneCards | Ulcerative Colitis | ITGA2    |
| GeneCards | Ulcerative Colitis | CAV2     |
| GeneCards | Ulcerative Colitis | PF4      |
| GeneCards | Ulcerative Colitis | CCN1     |
| GeneCards | Ulcerative Colitis | TOM1     |
| GeneCards | Ulcerative Colitis | USP25    |
| GeneCards | Ulcerative Colitis | CFI      |
| GeneCards | Ulcerative Colitis | PTK2     |
| GeneCards | Ulcerative Colitis | ITGB3    |
| GeneCards | Ulcerative Colitis | ADH1C    |

|           |                    |          |
|-----------|--------------------|----------|
| GeneCards | Ulcerative Colitis | PAK1     |
| GeneCards | Ulcerative Colitis | ATP6V1G2 |
| GeneCards | Ulcerative Colitis | OSCAR    |
| GeneCards | Ulcerative Colitis | UBASH3B  |
| GeneCards | Ulcerative Colitis | GOLGB1   |
| GeneCards | Ulcerative Colitis | TNFSF14  |
| GeneCards | Ulcerative Colitis | FCN3     |
| GeneCards | Ulcerative Colitis | IL13RA1  |
| GeneCards | Ulcerative Colitis | GIMAP5   |
| GeneCards | Ulcerative Colitis | SULT1A3  |
| GeneCards | Ulcerative Colitis | MRGPRX2  |
| GeneCards | Ulcerative Colitis | CCR2     |
| GeneCards | Ulcerative Colitis | FYN      |
| GeneCards | Ulcerative Colitis | ARMH3    |
| GeneCards | Ulcerative Colitis | MIR103A2 |
| GeneCards | Ulcerative Colitis | PPBP     |
| GeneCards | Ulcerative Colitis | TXK      |
| GeneCards | Ulcerative Colitis | MLKL     |
| GeneCards | Ulcerative Colitis | CNR1     |
| GeneCards | Ulcerative Colitis | ADORA2A  |
| GeneCards | Ulcerative Colitis | CDK5RAP1 |
| GeneCards | Ulcerative Colitis | SMOX     |
| GeneCards | Ulcerative Colitis | ST14     |
| GeneCards | Ulcerative Colitis | NTF3     |
| GeneCards | Ulcerative Colitis | CREM     |
| GeneCards | Ulcerative Colitis | GART     |
| GeneCards | Ulcerative Colitis | RGS14    |
| GeneCards | Ulcerative Colitis | MUC16    |
| GeneCards | Ulcerative Colitis | RDX      |
| GeneCards | Ulcerative Colitis | MFGE8    |
| GeneCards | Ulcerative Colitis | F11R     |
| GeneCards | Ulcerative Colitis | NTAN1    |
| GeneCards | Ulcerative Colitis | SPHK1    |
| GeneCards | Ulcerative Colitis | KIR2DL2  |
| GeneCards | Ulcerative Colitis | KIR2DS2  |
| GeneCards | Ulcerative Colitis | MMP11    |
| GeneCards | Ulcerative Colitis | PFKM     |
| GeneCards | Ulcerative Colitis | SERPINB1 |
| GeneCards | Ulcerative Colitis | ASCL2    |
| GeneCards | Ulcerative Colitis | SOX2     |
| GeneCards | Ulcerative Colitis | RHOH     |
| GeneCards | Ulcerative Colitis | ABCB11   |
| GeneCards | Ulcerative Colitis | RETN     |
| GeneCards | Ulcerative Colitis | IL24     |

|           |                    |          |
|-----------|--------------------|----------|
| GeneCards | Ulcerative Colitis | REG1B    |
| GeneCards | Ulcerative Colitis | LMAN1    |
| GeneCards | Ulcerative Colitis | SERPINF1 |
| GeneCards | Ulcerative Colitis | GTF2E2   |
| GeneCards | Ulcerative Colitis | MGAT5    |
| GeneCards | Ulcerative Colitis | APBA1    |
| GeneCards | Ulcerative Colitis | GAS7     |
| GeneCards | Ulcerative Colitis | PSD      |
| GeneCards | Ulcerative Colitis | S100Z    |
| GeneCards | Ulcerative Colitis | PRAC2    |
| GeneCards | Ulcerative Colitis | GSDMA    |
| GeneCards | Ulcerative Colitis | HDAC1    |
| GeneCards | Ulcerative Colitis | E2F1     |
| GeneCards | Ulcerative Colitis | ITGB7    |
| GeneCards | Ulcerative Colitis | MIR191   |
| GeneCards | Ulcerative Colitis | THY1     |
| GeneCards | Ulcerative Colitis | MAPRE1   |
| GeneCards | Ulcerative Colitis | TACR2    |
| GeneCards | Ulcerative Colitis | CORO1A   |
| GeneCards | Ulcerative Colitis | SLC3A2   |
| GeneCards | Ulcerative Colitis | MTMR3    |
| GeneCards | Ulcerative Colitis | HORMAD2  |
| GeneCards | Ulcerative Colitis | TERF2    |
| GeneCards | Ulcerative Colitis | LTB      |
| GeneCards | Ulcerative Colitis | LBP      |
| GeneCards | Ulcerative Colitis | ETS2     |
| GeneCards | Ulcerative Colitis | STK11    |
| GeneCards | Ulcerative Colitis | KIR2DL1  |
| GeneCards | Ulcerative Colitis | PMEL     |
| GeneCards | Ulcerative Colitis | PRKN     |
| GeneCards | Ulcerative Colitis | SLC45A2  |
| GeneCards | Ulcerative Colitis | EZR      |
| GeneCards | Ulcerative Colitis | TMPO     |
| GeneCards | Ulcerative Colitis | PTGDR2   |
| GeneCards | Ulcerative Colitis | VASP     |
| GeneCards | Ulcerative Colitis | KLKB1    |
| GeneCards | Ulcerative Colitis | DHFR     |
| GeneCards | Ulcerative Colitis | GPANK1   |
| GeneCards | Ulcerative Colitis | PTGIR    |
| GeneCards | Ulcerative Colitis | MIR18A   |
| GeneCards | Ulcerative Colitis | DOCK2    |
| GeneCards | Ulcerative Colitis | SGF29    |
| GeneCards | Ulcerative Colitis | RAG2     |
| GeneCards | Ulcerative Colitis | SPINK1   |

|           |                    |            |
|-----------|--------------------|------------|
| GeneCards | Ulcerative Colitis | CYP24A1    |
| GeneCards | Ulcerative Colitis | IRAK4      |
| GeneCards | Ulcerative Colitis | VDAC1      |
| GeneCards | Ulcerative Colitis | MMP26      |
| GeneCards | Ulcerative Colitis | MDC1       |
| GeneCards | Ulcerative Colitis | ARRB1      |
| GeneCards | Ulcerative Colitis | MIR30C1    |
| GeneCards | Ulcerative Colitis | EDNRA      |
| GeneCards | Ulcerative Colitis | KL         |
| GeneCards | Ulcerative Colitis | ABL1       |
| GeneCards | Ulcerative Colitis | IFNAR2     |
| GeneCards | Ulcerative Colitis | MAP3K8     |
| GeneCards | Ulcerative Colitis | MLNR       |
| GeneCards | Ulcerative Colitis | KCNN4      |
| GeneCards | Ulcerative Colitis | XK         |
| GeneCards | Ulcerative Colitis | MAPT       |
| GeneCards | Ulcerative Colitis | TICAM1     |
| GeneCards | Ulcerative Colitis | CTBP1      |
| GeneCards | Ulcerative Colitis | LALBA      |
| GeneCards | Ulcerative Colitis | MAFK       |
| GeneCards | Ulcerative Colitis | SLC39A8    |
| GeneCards | Ulcerative Colitis | MCCD1      |
| GeneCards | Ulcerative Colitis | DICER1     |
| GeneCards | Ulcerative Colitis | SETDB1     |
| GeneCards | Ulcerative Colitis | LDHA       |
| GeneCards | Ulcerative Colitis | JAG1       |
| GeneCards | Ulcerative Colitis | S100A1     |
| GeneCards | Ulcerative Colitis | DLAT       |
| GeneCards | Ulcerative Colitis | CGN        |
| GeneCards | Ulcerative Colitis | NDUFA13    |
| GeneCards | Ulcerative Colitis | EPN3       |
| GeneCards | Ulcerative Colitis | CD1E       |
| GeneCards | Ulcerative Colitis | PVT1       |
| GeneCards | Ulcerative Colitis | MAP1LC3B   |
| GeneCards | Ulcerative Colitis | PRKCA      |
| GeneCards | Ulcerative Colitis | SLC2A1     |
| GeneCards | Ulcerative Colitis | SLC22A2    |
| GeneCards | Ulcerative Colitis | AQP4       |
| GeneCards | Ulcerative Colitis | AQP7       |
| GeneCards | Ulcerative Colitis | PSMB10     |
| GeneCards | Ulcerative Colitis | TRAF1      |
| GeneCards | Ulcerative Colitis | NEAT1      |
| GeneCards | Ulcerative Colitis | ST6GALNAC1 |
| GeneCards | Ulcerative Colitis | FAP        |

|           |                    |           |
|-----------|--------------------|-----------|
| GeneCards | Ulcerative Colitis | RBPJ      |
| GeneCards | Ulcerative Colitis | MCM2      |
| GeneCards | Ulcerative Colitis | KDM4C     |
| GeneCards | Ulcerative Colitis | DDC       |
| GeneCards | Ulcerative Colitis | MIR133A1  |
| GeneCards | Ulcerative Colitis | EPHA3     |
| GeneCards | Ulcerative Colitis | REN       |
| GeneCards | Ulcerative Colitis | LTBR      |
| GeneCards | Ulcerative Colitis | SLC37A1   |
| GeneCards | Ulcerative Colitis | MIR185    |
| GeneCards | Ulcerative Colitis | MIR338    |
| GeneCards | Ulcerative Colitis | NBR1      |
| GeneCards | Ulcerative Colitis | EVPL      |
| GeneCards | Ulcerative Colitis | SERPINB2  |
| GeneCards | Ulcerative Colitis | SLC11A2   |
| GeneCards | Ulcerative Colitis | FLI1      |
| GeneCards | Ulcerative Colitis | NR3C2     |
| GeneCards | Ulcerative Colitis | CEACAM1   |
| GeneCards | Ulcerative Colitis | SLAMF6    |
| GeneCards | Ulcerative Colitis | NBN       |
| GeneCards | Ulcerative Colitis | LACTB     |
| GeneCards | Ulcerative Colitis | SDC1      |
| GeneCards | Ulcerative Colitis | LGALS3BP  |
| GeneCards | Ulcerative Colitis | PMCH      |
| GeneCards | Ulcerative Colitis | PRKCB     |
| GeneCards | Ulcerative Colitis | CNTF      |
| GeneCards | Ulcerative Colitis | RNF5      |
| GeneCards | Ulcerative Colitis | HTRA1     |
| GeneCards | Ulcerative Colitis | FURIN     |
| GeneCards | Ulcerative Colitis | ALDOB     |
| GeneCards | Ulcerative Colitis | PRODH     |
| GeneCards | Ulcerative Colitis | DDB2      |
| GeneCards | Ulcerative Colitis | DSG3      |
| GeneCards | Ulcerative Colitis | UGT1A7    |
| GeneCards | Ulcerative Colitis | PLCL1     |
| GeneCards | Ulcerative Colitis | RMI2      |
| GeneCards | Ulcerative Colitis | ARHGAP45  |
| GeneCards | Ulcerative Colitis | KCNQ1OT1  |
| GeneCards | Ulcerative Colitis | HOXA11-AS |
| GeneCards | Ulcerative Colitis | ZEB1-AS1  |
| GeneCards | Ulcerative Colitis | TKT       |
| GeneCards | Ulcerative Colitis | MIR675    |
| GeneCards | Ulcerative Colitis | LRG1      |
| GeneCards | Ulcerative Colitis | RASSF1    |

|           |                    |          |
|-----------|--------------------|----------|
| GeneCards | Ulcerative Colitis | TMPRSS6  |
| GeneCards | Ulcerative Colitis | ITIH4    |
| GeneCards | Ulcerative Colitis | CEP250   |
| GeneCards | Ulcerative Colitis | MAML2    |
| GeneCards | Ulcerative Colitis | LIME1    |
| GeneCards | Ulcerative Colitis | DDX39B   |
| GeneCards | Ulcerative Colitis | CISD1    |
| GeneCards | Ulcerative Colitis | ADCY7    |
| GeneCards | Ulcerative Colitis | CLN3     |
| GeneCards | Ulcerative Colitis | ATXN2L   |
| GeneCards | Ulcerative Colitis | DSG2     |
| GeneCards | Ulcerative Colitis | SERPINA3 |
| GeneCards | Ulcerative Colitis | RNF128   |
| GeneCards | Ulcerative Colitis | APOA4    |
| GeneCards | Ulcerative Colitis | ENPP7    |
| GeneCards | Ulcerative Colitis | SLC6A14  |
| GeneCards | Ulcerative Colitis | KHDRBS3  |
| GeneCards | Ulcerative Colitis | CYP7A1   |
| GeneCards | Ulcerative Colitis | DSG1     |
| GeneCards | Ulcerative Colitis | ACP1     |
| GeneCards | Ulcerative Colitis | FCGRT    |
| GeneCards | Ulcerative Colitis | ACADVL   |
| GeneCards | Ulcerative Colitis | IL32     |
| GeneCards | Ulcerative Colitis | CLK2     |
| GeneCards | Ulcerative Colitis | CALB2    |
| GeneCards | Ulcerative Colitis | MIR124-3 |
| GeneCards | Ulcerative Colitis | MAPK9    |
| GeneCards | Ulcerative Colitis | NDRG1    |
| GeneCards | Ulcerative Colitis | C2       |
| GeneCards | Ulcerative Colitis | LAG3     |
| GeneCards | Ulcerative Colitis | ITK      |
| GeneCards | Ulcerative Colitis | CFHR2    |
| GeneCards | Ulcerative Colitis | NLRP7    |
| GeneCards | Ulcerative Colitis | XRCC5    |
| GeneCards | Ulcerative Colitis | TOP1     |
| GeneCards | Ulcerative Colitis | EPHX2    |
| GeneCards | Ulcerative Colitis | CYP2J2   |
| GeneCards | Ulcerative Colitis | IL17RD   |
| GeneCards | Ulcerative Colitis | ATG3     |
| GeneCards | Ulcerative Colitis | MTMR2    |
| GeneCards | Ulcerative Colitis | CD48     |
| GeneCards | Ulcerative Colitis | MIR211   |
| GeneCards | Ulcerative Colitis | CD3D     |
| GeneCards | Ulcerative Colitis | BLVRB    |



|           |                    |           |
|-----------|--------------------|-----------|
| GeneCards | Ulcerative Colitis | CEBPB     |
| GeneCards | Ulcerative Colitis | CYP2A6    |
| GeneCards | Ulcerative Colitis | NR0B2     |
| GeneCards | Ulcerative Colitis | ANXA7     |
| GeneCards | Ulcerative Colitis | XRCC6     |
| GeneCards | Ulcerative Colitis | ELF3      |
| GeneCards | Ulcerative Colitis | HRH1      |
| GeneCards | Ulcerative Colitis | CDH2      |
| GeneCards | Ulcerative Colitis | AMBP      |
| GeneCards | Ulcerative Colitis | FES       |
| GeneCards | Ulcerative Colitis | MAP2K5    |
| GeneCards | Ulcerative Colitis | TCF3      |
| GeneCards | Ulcerative Colitis | NUDT1     |
| GeneCards | Ulcerative Colitis | PTBP1     |
| GeneCards | Ulcerative Colitis | NKD1      |
| GeneCards | Ulcerative Colitis | SCARNA5   |
| GeneCards | Ulcerative Colitis | HOTAIRM1  |
| GeneCards | Ulcerative Colitis | LINC00460 |
| GeneCards | Ulcerative Colitis | MIR422A   |
| GeneCards | Ulcerative Colitis | KAT5      |
| GeneCards | Ulcerative Colitis | CCL19     |
| GeneCards | Ulcerative Colitis | CASP14    |
| GeneCards | Ulcerative Colitis | STX2      |
| GeneCards | Ulcerative Colitis | ACADS     |
| GeneCards | Ulcerative Colitis | CTNND1    |
| GeneCards | Ulcerative Colitis | ADAM15    |
| GeneCards | Ulcerative Colitis | SIKE1     |
| GeneCards | Ulcerative Colitis | CXCL3     |
| GeneCards | Ulcerative Colitis | CD5       |
| GeneCards | Ulcerative Colitis | TNFRSF17  |
| GeneCards | Ulcerative Colitis | HSD17B10  |
| GeneCards | Ulcerative Colitis | TIA1      |
| GeneCards | Ulcerative Colitis | CAV3      |
| GeneCards | Ulcerative Colitis | FCRL3     |
| GeneCards | Ulcerative Colitis | MAPKAPK2  |
| GeneCards | Ulcerative Colitis | PPP5C     |
| GeneCards | Ulcerative Colitis | MSTO1     |
| GeneCards | Ulcerative Colitis | TRIB1     |
| GeneCards | Ulcerative Colitis | ZPBP      |
| GeneCards | Ulcerative Colitis | TSPAN33   |
| GeneCards | Ulcerative Colitis | PTGDS     |
| GeneCards | Ulcerative Colitis | AKAP12    |
| GeneCards | Ulcerative Colitis | BLOC1S6   |
| GeneCards | Ulcerative Colitis | TNC       |

|           |                    |          |
|-----------|--------------------|----------|
| GeneCards | Ulcerative Colitis | GPR18    |
| GeneCards | Ulcerative Colitis | DVL2     |
| GeneCards | Ulcerative Colitis | FOXE1    |
| GeneCards | Ulcerative Colitis | KRT17    |
| GeneCards | Ulcerative Colitis | MIR9-1   |
| GeneCards | Ulcerative Colitis | TFPI     |
| GeneCards | Ulcerative Colitis | PDCD1LG2 |
| GeneCards | Ulcerative Colitis | MT-ND4   |
| GeneCards | Ulcerative Colitis | SYNE1    |
| GeneCards | Ulcerative Colitis | SLC7A5   |
| GeneCards | Ulcerative Colitis | IRF4     |
| GeneCards | Ulcerative Colitis | MMP15    |
| GeneCards | Ulcerative Colitis | FIP1L1   |
| GeneCards | Ulcerative Colitis | CD3G     |
| GeneCards | Ulcerative Colitis | SEPSECS  |
| GeneCards | Ulcerative Colitis | BCHE     |
| GeneCards | Ulcerative Colitis | NR4A1    |
| GeneCards | Ulcerative Colitis | WNT1     |
| GeneCards | Ulcerative Colitis | XRCC3    |
| GeneCards | Ulcerative Colitis | MIRLET7E |
| GeneCards | Ulcerative Colitis | TBXAS1   |
| GeneCards | Ulcerative Colitis | RAF1     |
| GeneCards | Ulcerative Colitis | FLVCR2   |
| GeneCards | Ulcerative Colitis | SLC48A1  |
| GeneCards | Ulcerative Colitis | TRPV1    |
| GeneCards | Ulcerative Colitis | THBS1    |
| GeneCards | Ulcerative Colitis | ID1      |
| GeneCards | Ulcerative Colitis | IGFBP2   |
| GeneCards | Ulcerative Colitis | ZNF148   |
| GeneCards | Ulcerative Colitis | CYSLTR1  |
| GeneCards | Ulcerative Colitis | NCAPD3   |
| GeneCards | Ulcerative Colitis | BCL2L12  |
| GeneCards | Ulcerative Colitis | RAB6A    |
| GeneCards | Ulcerative Colitis | FZD8     |
| GeneCards | Ulcerative Colitis | IL22RA2  |
| GeneCards | Ulcerative Colitis | LGALS2   |
| GeneCards | Ulcerative Colitis | FHL2     |
| GeneCards | Ulcerative Colitis | MAGT1    |
| GeneCards | Ulcerative Colitis | SUZ12    |
| GeneCards | Ulcerative Colitis | STC1     |
| GeneCards | Ulcerative Colitis | IL1F10   |
| GeneCards | Ulcerative Colitis | OPLAH    |
| GeneCards | Ulcerative Colitis | GGH      |
| GeneCards | Ulcerative Colitis | FOSL2    |

|           |                    |          |
|-----------|--------------------|----------|
| GeneCards | Ulcerative Colitis | TAGAP    |
| GeneCards | Ulcerative Colitis | TNFSF18  |
| GeneCards | Ulcerative Colitis | TRAF3    |
| GeneCards | Ulcerative Colitis | RBP4     |
| GeneCards | Ulcerative Colitis | ALPI     |
| GeneCards | Ulcerative Colitis | METAP2   |
| GeneCards | Ulcerative Colitis | TRDMT1   |
| GeneCards | Ulcerative Colitis | HTR3A    |
| GeneCards | Ulcerative Colitis | ZEB1     |
| GeneCards | Ulcerative Colitis | UBC      |
| GeneCards | Ulcerative Colitis | CAMK2G   |
| GeneCards | Ulcerative Colitis | MIR22    |
| GeneCards | Ulcerative Colitis | EIF2S1   |
| GeneCards | Ulcerative Colitis | BABAM2   |
| GeneCards | Ulcerative Colitis | VEGFC    |
| GeneCards | Ulcerative Colitis | VNN1     |
| GeneCards | Ulcerative Colitis | MEP1A    |
| GeneCards | Ulcerative Colitis | IL36A    |
| GeneCards | Ulcerative Colitis | RAD21    |
| GeneCards | Ulcerative Colitis | RARG     |
| GeneCards | Ulcerative Colitis | GABPA    |
| GeneCards | Ulcerative Colitis | IL36B    |
| GeneCards | Ulcerative Colitis | RPL35P3  |
| GeneCards | Ulcerative Colitis | GP2      |
| GeneCards | Ulcerative Colitis | SFRP1    |
| GeneCards | Ulcerative Colitis | IRAK3    |
| GeneCards | Ulcerative Colitis | OGA      |
| GeneCards | Ulcerative Colitis | PIK3CB   |
| GeneCards | Ulcerative Colitis | MIR181A1 |
| GeneCards | Ulcerative Colitis | IKBKE    |
| GeneCards | Ulcerative Colitis | MUS81    |
| GeneCards | Ulcerative Colitis | SETD1A   |
| GeneCards | Ulcerative Colitis | ASH1L    |
| GeneCards | Ulcerative Colitis | POLA2    |
| GeneCards | Ulcerative Colitis | USP19    |
| GeneCards | Ulcerative Colitis | NRBP1    |
| GeneCards | Ulcerative Colitis | ATG2A    |
| GeneCards | Ulcerative Colitis | ST7      |
| GeneCards | Ulcerative Colitis | FCGR1A   |
| GeneCards | Ulcerative Colitis | ATG7     |
| GeneCards | Ulcerative Colitis | ANKRD55  |
| GeneCards | Ulcerative Colitis | INTS11   |
| GeneCards | Ulcerative Colitis | PLEK     |
| GeneCards | Ulcerative Colitis | RECK     |

|           |                    |           |
|-----------|--------------------|-----------|
| GeneCards | Ulcerative Colitis | MUC20     |
| GeneCards | Ulcerative Colitis | MIR10B    |
| GeneCards | Ulcerative Colitis | GALC      |
| GeneCards | Ulcerative Colitis | CTSW      |
| GeneCards | Ulcerative Colitis | MIR27B    |
| GeneCards | Ulcerative Colitis | AIM2      |
| GeneCards | Ulcerative Colitis | C1GALT1C1 |
| GeneCards | Ulcerative Colitis | RHO       |
| GeneCards | Ulcerative Colitis | CXCR5     |
| GeneCards | Ulcerative Colitis | SIGIRR    |
| GeneCards | Ulcerative Colitis | SULT2A1   |
| GeneCards | Ulcerative Colitis | SLC10A2   |
| GeneCards | Ulcerative Colitis | ILK       |
| GeneCards | Ulcerative Colitis | ADORA3    |
| GeneCards | Ulcerative Colitis | USP2      |
| GeneCards | Ulcerative Colitis | HTT       |
| GeneCards | Ulcerative Colitis | MAP1A     |
| GeneCards | Ulcerative Colitis | BICD1     |
| GeneCards | Ulcerative Colitis | CD300C    |
| GeneCards | Ulcerative Colitis | PPL       |
| GeneCards | Ulcerative Colitis | MMP19     |
| GeneCards | Ulcerative Colitis | MIR132    |
| GeneCards | Ulcerative Colitis | SERPINB5  |
| GeneCards | Ulcerative Colitis | RAB5A     |
| GeneCards | Ulcerative Colitis | FAAH      |
| GeneCards | Ulcerative Colitis | KSR1      |
| GeneCards | Ulcerative Colitis | DEFA1     |
| GeneCards | Ulcerative Colitis | CLEC16A   |
| GeneCards | Ulcerative Colitis | TPM1      |
| GeneCards | Ulcerative Colitis | RPS2P34   |
| GeneCards | Ulcerative Colitis | LOC442427 |
| GeneCards | Ulcerative Colitis | TBK1      |
| GeneCards | Ulcerative Colitis | OLFM4     |
| GeneCards | Ulcerative Colitis | NSD1      |
| GeneCards | Ulcerative Colitis | ANXA2     |
| GeneCards | Ulcerative Colitis | OSM       |
| GeneCards | Ulcerative Colitis | CA1       |
| GeneCards | Ulcerative Colitis | FOXO1     |
| GeneCards | Ulcerative Colitis | CASP5     |
| GeneCards | Ulcerative Colitis | CCL28     |
| GeneCards | Ulcerative Colitis | NTSR1     |
| GeneCards | Ulcerative Colitis | RUNX2     |
| GeneCards | Ulcerative Colitis | NHEJ1     |
| GeneCards | Ulcerative Colitis | CIDEB     |

|           |                    |         |
|-----------|--------------------|---------|
| GeneCards | Ulcerative Colitis | SUOX    |
| GeneCards | Ulcerative Colitis | CTBP2   |
| GeneCards | Ulcerative Colitis | TCF7    |
| GeneCards | Ulcerative Colitis | TIAM1   |
| GeneCards | Ulcerative Colitis | CDCP1   |
| GeneCards | Ulcerative Colitis | CARD11  |
| GeneCards | Ulcerative Colitis | GPX4    |
| GeneCards | Ulcerative Colitis | LNPEP   |
| GeneCards | Ulcerative Colitis | RIT1    |
| GeneCards | Ulcerative Colitis | RPS6KA4 |
| GeneCards | Ulcerative Colitis | ATF4    |
| GeneCards | Ulcerative Colitis | FADS2   |
| GeneCards | Ulcerative Colitis | HDAC7   |
| GeneCards | Ulcerative Colitis | PMPCA   |
| GeneCards | Ulcerative Colitis | TNNI2   |
| GeneCards | Ulcerative Colitis | MANBA   |
| GeneCards | Ulcerative Colitis | PNKD    |
| GeneCards | Ulcerative Colitis | SPRY4   |
| GeneCards | Ulcerative Colitis | USF1    |
| GeneCards | Ulcerative Colitis | BRD7    |
| GeneCards | Ulcerative Colitis | CALM3   |
| GeneCards | Ulcerative Colitis | CD226   |
| GeneCards | Ulcerative Colitis | CD6     |
| GeneCards | Ulcerative Colitis | SPRED2  |
| GeneCards | Ulcerative Colitis | FIBP    |
| GeneCards | Ulcerative Colitis | ITPKA   |
| GeneCards | Ulcerative Colitis | LPXN    |
| GeneCards | Ulcerative Colitis | NDUFAF1 |
| GeneCards | Ulcerative Colitis | SEMA6D  |
| GeneCards | Ulcerative Colitis | SKAP2   |
| GeneCards | Ulcerative Colitis | DUSP16  |
| GeneCards | Ulcerative Colitis | PDLIM4  |
| GeneCards | Ulcerative Colitis | ACSL6   |
| GeneCards | Ulcerative Colitis | CRTC3   |
| GeneCards | Ulcerative Colitis | CTDSP1  |
| GeneCards | Ulcerative Colitis | ZNF365  |
| GeneCards | Ulcerative Colitis | DOK3    |
| GeneCards | Ulcerative Colitis | NDFIP1  |
| GeneCards | Ulcerative Colitis | SLC7A10 |
| GeneCards | Ulcerative Colitis | THADA   |
| GeneCards | Ulcerative Colitis | CHP1    |
| GeneCards | Ulcerative Colitis | CPEB4   |
| GeneCards | Ulcerative Colitis | FCRLA   |
| GeneCards | Ulcerative Colitis | SFMBT1  |

|           |                    |              |
|-----------|--------------------|--------------|
| GeneCards | Ulcerative Colitis | SLC39A11     |
| GeneCards | Ulcerative Colitis | SNX20        |
| GeneCards | Ulcerative Colitis | SNX32        |
| GeneCards | Ulcerative Colitis | ZNF300       |
| GeneCards | Ulcerative Colitis | ARHGAP30     |
| GeneCards | Ulcerative Colitis | TM9SF4       |
| GeneCards | Ulcerative Colitis | TMBIM1       |
| GeneCards | Ulcerative Colitis | DENND1B      |
| GeneCards | Ulcerative Colitis | PHTF1        |
| GeneCards | Ulcerative Colitis | RFTN2        |
| GeneCards | Ulcerative Colitis | TSPAN14      |
| GeneCards | Ulcerative Colitis | NUSAP1       |
| GeneCards | Ulcerative Colitis | TMEM50B      |
| GeneCards | Ulcerative Colitis | TTYH3        |
| GeneCards | Ulcerative Colitis | CCDC116      |
| GeneCards | Ulcerative Colitis | CCDC85B      |
| GeneCards | Ulcerative Colitis | YDJC         |
| GeneCards | Ulcerative Colitis | ZNF831       |
| GeneCards | Ulcerative Colitis | NXPE4        |
| GeneCards | Ulcerative Colitis | PUSL1        |
| GeneCards | Ulcerative Colitis | C10orf55     |
| GeneCards | Ulcerative Colitis | SANBR        |
| GeneCards | Ulcerative Colitis | AHSA2P       |
| GeneCards | Ulcerative Colitis | IRF1-AS1     |
| GeneCards | Ulcerative Colitis | TRAF3IP2-AS1 |
| GeneCards | Ulcerative Colitis | FOSL2-AS1    |
| GeneCards | Ulcerative Colitis | IGFBP1       |
| GeneCards | Ulcerative Colitis | HCRTR1       |
| GeneCards | Ulcerative Colitis | TRAP1        |
| GeneCards | Ulcerative Colitis | ALPP         |
| GeneCards | Ulcerative Colitis | ADH1B        |
| GeneCards | Ulcerative Colitis | KIR3DL2      |
| GeneCards | Ulcerative Colitis | MIR29B1      |
| GeneCards | Ulcerative Colitis | AKT2         |
| GeneCards | Ulcerative Colitis | AKT3         |
| GeneCards | Ulcerative Colitis | ZNF354B      |
| GeneCards | Ulcerative Colitis | TERF2IP      |
| GeneCards | Ulcerative Colitis | ANG          |
| GeneCards | Ulcerative Colitis | PRSS8        |
| GeneCards | Ulcerative Colitis | TRIM33       |
| GeneCards | Ulcerative Colitis | P2RX7        |
| GeneCards | Ulcerative Colitis | WNT3         |
| GeneCards | Ulcerative Colitis | MIR183       |
| GeneCards | Ulcerative Colitis | GLI3         |

|           |                    |              |
|-----------|--------------------|--------------|
| GeneCards | Ulcerative Colitis | SLC9A1       |
| GeneCards | Ulcerative Colitis | GZMM         |
| GeneCards | Ulcerative Colitis | CEACAM7      |
| GeneCards | Ulcerative Colitis | NPHP1        |
| GeneCards | Ulcerative Colitis | PSMD4        |
| GeneCards | Ulcerative Colitis | ABCB8        |
| GeneCards | Ulcerative Colitis | NACA         |
| GeneCards | Ulcerative Colitis | TNFRSF10C    |
| GeneCards | Ulcerative Colitis | CSNK1A1L     |
| GeneCards | Ulcerative Colitis | FAM215A      |
| GeneCards | Ulcerative Colitis | BORCS8-MEF2B |
| GeneCards | Ulcerative Colitis | OCTN3        |
| GeneCards | Ulcerative Colitis | CXCL13       |
| GeneCards | Ulcerative Colitis | CD1C         |
| GeneCards | Ulcerative Colitis | CD1B         |
| GeneCards | Ulcerative Colitis | OSMR         |
| GeneCards | Ulcerative Colitis | ALOX15B      |
| GeneCards | Ulcerative Colitis | PRDM16       |
| GeneCards | Ulcerative Colitis | DDIT4        |
| GeneCards | Ulcerative Colitis | DEFB104A     |
| GeneCards | Ulcerative Colitis | APAF1        |
| GeneCards | Ulcerative Colitis | VIPR1        |
| GeneCards | Ulcerative Colitis | ATF3         |
| GeneCards | Ulcerative Colitis | LEPQTL1      |
| GeneCards | Ulcerative Colitis | IRF3         |
| GeneCards | Ulcerative Colitis | CYTH1        |
| GeneCards | Ulcerative Colitis | DXO          |
| GeneCards | Ulcerative Colitis | RBP3         |
| GeneCards | Ulcerative Colitis | ABCB4        |
| GeneCards | Ulcerative Colitis | CDK1         |
| GeneCards | Ulcerative Colitis | APOA1        |
| GeneCards | Ulcerative Colitis | FNIP1        |
| GeneCards | Ulcerative Colitis | SOCS2        |
| GeneCards | Ulcerative Colitis | COL5A1       |
| GeneCards | Ulcerative Colitis | SEC31B       |
| GeneCards | Ulcerative Colitis | RING1        |
| GeneCards | Ulcerative Colitis | HLA-DOA      |
| GeneCards | Ulcerative Colitis | REEP1        |
| GeneCards | Ulcerative Colitis | IRS2         |
| GeneCards | Ulcerative Colitis | ZFP36L1      |
| GeneCards | Ulcerative Colitis | MACF1        |
| GeneCards | Ulcerative Colitis | HRH3         |
| GeneCards | Ulcerative Colitis | RXRΒ         |
| GeneCards | Ulcerative Colitis | AIF1         |

|           |                    |         |
|-----------|--------------------|---------|
| GeneCards | Ulcerative Colitis | FEN1    |
| GeneCards | Ulcerative Colitis | ACAT2   |
| GeneCards | Ulcerative Colitis | PRDX4   |
| GeneCards | Ulcerative Colitis | TUBB6   |
| GeneCards | Ulcerative Colitis | DNAJC15 |
| GeneCards | Ulcerative Colitis | MIR506  |
| GeneCards | Ulcerative Colitis | CBS     |
| GeneCards | Ulcerative Colitis | KCNQ1   |
| GeneCards | Ulcerative Colitis | ATF2    |
| GeneCards | Ulcerative Colitis | CAMK4   |
| GeneCards | Ulcerative Colitis | C1GALT1 |
| GeneCards | Ulcerative Colitis | PER3    |
| GeneCards | Ulcerative Colitis | BDH2    |
| GeneCards | Ulcerative Colitis | LRRC3C  |
| GeneCards | Ulcerative Colitis | CXCL6   |
| GeneCards | Ulcerative Colitis | RBBP5   |
| GeneCards | Ulcerative Colitis | ABCC1   |
| GeneCards | Ulcerative Colitis | MIR23B  |
| GeneCards | Ulcerative Colitis | MIR423  |
| GeneCards | Ulcerative Colitis | AGFG1   |
| GeneCards | Ulcerative Colitis | BLOC1S2 |
| GeneCards | Ulcerative Colitis | FGFR4   |
| GeneCards | Ulcerative Colitis | ANTXR1  |
| GeneCards | Ulcerative Colitis | FOXP1   |
| GeneCards | Ulcerative Colitis | VEGFD   |
| GeneCards | Ulcerative Colitis | ACTC1   |
| GeneCards | Ulcerative Colitis | EFNB2   |
| GeneCards | Ulcerative Colitis | PPOX    |
| GeneCards | Ulcerative Colitis | PPP2R3C |
| GeneCards | Ulcerative Colitis | WDR6    |
| GeneCards | Ulcerative Colitis | PDGFA   |
| GeneCards | Ulcerative Colitis | LPIN2   |
| GeneCards | Ulcerative Colitis | PDCD4   |
| GeneCards | Ulcerative Colitis | GOLM1   |
| GeneCards | Ulcerative Colitis | MIR495  |
| GeneCards | Ulcerative Colitis | IL21R   |
| GeneCards | Ulcerative Colitis | BDKRB1  |
| GeneCards | Ulcerative Colitis | SCNN1B  |
| GeneCards | Ulcerative Colitis | EIF2AK3 |
| GeneCards | Ulcerative Colitis | SCNN1G  |
| GeneCards | Ulcerative Colitis | SDHA    |
| GeneCards | Ulcerative Colitis | AKR1C3  |
| GeneCards | Ulcerative Colitis | CYC1    |
| GeneCards | Ulcerative Colitis | HMGA1   |



|           |                    |              |
|-----------|--------------------|--------------|
| GeneCards | Ulcerative Colitis | KCNE3        |
| GeneCards | Ulcerative Colitis | C1QBP        |
| GeneCards | Ulcerative Colitis | CPA6         |
| GeneCards | Ulcerative Colitis | EYA4         |
| GeneCards | Ulcerative Colitis | CITED2       |
| GeneCards | Ulcerative Colitis | RHOB         |
| GeneCards | Ulcerative Colitis | TTBK2        |
| GeneCards | Ulcerative Colitis | AQP9         |
| GeneCards | Ulcerative Colitis | TUSC3        |
| GeneCards | Ulcerative Colitis | UTS2R        |
| GeneCards | Ulcerative Colitis | GPR55        |
| GeneCards | Ulcerative Colitis | IFITM1       |
| GeneCards | Ulcerative Colitis | LEFTY1       |
| GeneCards | Ulcerative Colitis | MXI1         |
| GeneCards | Ulcerative Colitis | NMB          |
| GeneCards | Ulcerative Colitis | RNF8         |
| GeneCards | Ulcerative Colitis | UQCRQ        |
| GeneCards | Ulcerative Colitis | BMP8B        |
| GeneCards | Ulcerative Colitis | MARVELD2     |
| GeneCards | Ulcerative Colitis | NEK6         |
| GeneCards | Ulcerative Colitis | SERPINA12    |
| GeneCards | Ulcerative Colitis | ATG10        |
| GeneCards | Ulcerative Colitis | CCL16        |
| GeneCards | Ulcerative Colitis | NUCKS1       |
| GeneCards | Ulcerative Colitis | TIMD4        |
| GeneCards | Ulcerative Colitis | RC3H1        |
| GeneCards | Ulcerative Colitis | ANP32E       |
| GeneCards | Ulcerative Colitis | BAHD1        |
| GeneCards | Ulcerative Colitis | LRCH1        |
| GeneCards | Ulcerative Colitis | RAVER2       |
| GeneCards | Ulcerative Colitis | TAC4         |
| GeneCards | Ulcerative Colitis | CAVIN3       |
| GeneCards | Ulcerative Colitis | IGHG3        |
| GeneCards | Ulcerative Colitis | EXOC3-AS1    |
| GeneCards | Ulcerative Colitis | MIR4728      |
| GeneCards | Ulcerative Colitis | DEFA1A3      |
| GeneCards | Ulcerative Colitis | LOC110594336 |
| GeneCards | Ulcerative Colitis | DSC3         |
| GeneCards | Ulcerative Colitis | BCL3         |
| GeneCards | Ulcerative Colitis | TFAM         |
| GeneCards | Ulcerative Colitis | ANPEP        |
| GeneCards | Ulcerative Colitis | MIR135B      |
| GeneCards | Ulcerative Colitis | DRD1         |
| GeneCards | Ulcerative Colitis | AZU1         |

|           |                    |           |
|-----------|--------------------|-----------|
| GeneCards | Ulcerative Colitis | FBN1      |
| GeneCards | Ulcerative Colitis | MRE11     |
| GeneCards | Ulcerative Colitis | RAD51     |
| GeneCards | Ulcerative Colitis | YES1      |
| GeneCards | Ulcerative Colitis | MIRLET7F1 |
| GeneCards | Ulcerative Colitis | LINC-PINT |
| GeneCards | Ulcerative Colitis | SKP2      |
| GeneCards | Ulcerative Colitis | LOXL2     |
| GeneCards | Ulcerative Colitis | SLC10A1   |
| GeneCards | Ulcerative Colitis | SLC4A2    |
| GeneCards | Ulcerative Colitis | CYP8B1    |
| GeneCards | Ulcerative Colitis | DNAL1     |
| GeneCards | Ulcerative Colitis | SP100     |
| GeneCards | Ulcerative Colitis | SCTR      |
| GeneCards | Ulcerative Colitis | SLC51A    |
| GeneCards | Ulcerative Colitis | MT-CYB    |
| GeneCards | Ulcerative Colitis | CNTNAP2   |
| GeneCards | Ulcerative Colitis | PKP1      |
| GeneCards | Ulcerative Colitis | SLC26A6   |
| GeneCards | Ulcerative Colitis | MGAM      |
| GeneCards | Ulcerative Colitis | PROC      |
| GeneCards | Ulcerative Colitis | MIR151A   |
| GeneCards | Ulcerative Colitis | MIR455    |
| GeneCards | Ulcerative Colitis | CD38      |
| GeneCards | Ulcerative Colitis | MSN       |
| GeneCards | Ulcerative Colitis | CEACAM3   |
| GeneCards | Ulcerative Colitis | HMOX2     |
| GeneCards | Ulcerative Colitis | KIF15     |
| GeneCards | Ulcerative Colitis | TPO       |
| GeneCards | Ulcerative Colitis | MAP2K6    |
| GeneCards | Ulcerative Colitis | HMGCR     |
| GeneCards | Ulcerative Colitis | STX8      |
| GeneCards | Ulcerative Colitis | ITGA6     |
| GeneCards | Ulcerative Colitis | CCRL2     |
| GeneCards | Ulcerative Colitis | COL4A1    |
| GeneCards | Ulcerative Colitis | COL4A3    |
| GeneCards | Ulcerative Colitis | TNFRSF13B |
| GeneCards | Ulcerative Colitis | NES       |
| GeneCards | Ulcerative Colitis | CFP       |
| GeneCards | Ulcerative Colitis | CASP7     |
| GeneCards | Ulcerative Colitis | CCDC88B   |
| GeneCards | Ulcerative Colitis | FLNC      |
| GeneCards | Ulcerative Colitis | NCR3      |
| GeneCards | Ulcerative Colitis | NRM       |

|           |                    |           |
|-----------|--------------------|-----------|
| GeneCards | Ulcerative Colitis | POLR1H    |
| GeneCards | Ulcerative Colitis | MSTO2P    |
| GeneCards | Ulcerative Colitis | AP4B1-AS1 |
| GeneCards | Ulcerative Colitis | ADAMTS13  |
| GeneCards | Ulcerative Colitis | IL17C     |
| GeneCards | Ulcerative Colitis | XPO1      |
| GeneCards | Ulcerative Colitis | TEC       |
| GeneCards | Ulcerative Colitis | GLS       |
| GeneCards | Ulcerative Colitis | SLC29A4   |
| GeneCards | Ulcerative Colitis | DPEP1     |
| GeneCards | Ulcerative Colitis | MIR429    |
| GeneCards | Ulcerative Colitis | YY1       |
| GeneCards | Ulcerative Colitis | COL6A3    |
| GeneCards | Ulcerative Colitis | DEFA3     |
| GeneCards | Ulcerative Colitis | DSC1      |
| GeneCards | Ulcerative Colitis | MSX1      |
| GeneCards | Ulcerative Colitis | ARFGAP1   |
| GeneCards | Ulcerative Colitis | CBFA2T2   |
| GeneCards | Ulcerative Colitis | CYTOR     |
| GeneCards | Ulcerative Colitis | CD160     |
| GeneCards | Ulcerative Colitis | MIR92A1   |
| GeneCards | Ulcerative Colitis | CRYZ      |
| GeneCards | Ulcerative Colitis | RTL4      |
| GeneCards | Ulcerative Colitis | CASP4     |
| GeneCards | Ulcerative Colitis | TNFSF11   |
| GeneCards | Ulcerative Colitis | MIR28     |
| GeneCards | Ulcerative Colitis | CD84      |
| GeneCards | Ulcerative Colitis | HDAC2     |
| GeneCards | Ulcerative Colitis | JUP       |
| GeneCards | Ulcerative Colitis | NEK9      |
| GeneCards | Ulcerative Colitis | POLR1D    |
| GeneCards | Ulcerative Colitis | BANF1     |
| GeneCards | Ulcerative Colitis | DCTD      |
| GeneCards | Ulcerative Colitis | BAZ1A     |
| GeneCards | Ulcerative Colitis | HSD17B8   |
| GeneCards | Ulcerative Colitis | HMGA2     |
| GeneCards | Ulcerative Colitis | SEMA3E    |
| GeneCards | Ulcerative Colitis | NRON      |
| GeneCards | Ulcerative Colitis | HTR4      |
| GeneCards | Ulcerative Colitis | FBXW11    |
| GeneCards | Ulcerative Colitis | FOLR1     |
| GeneCards | Ulcerative Colitis | SLC12A2   |
| GeneCards | Ulcerative Colitis | MAP2K4    |
| GeneCards | Ulcerative Colitis | LXN       |

|           |                    |              |
|-----------|--------------------|--------------|
| GeneCards | Ulcerative Colitis | EPHB2        |
| GeneCards | Ulcerative Colitis | MT-CO2       |
| GeneCards | Ulcerative Colitis | FPGS         |
| GeneCards | Ulcerative Colitis | IKZF4        |
| GeneCards | Ulcerative Colitis | CFL1         |
| GeneCards | Ulcerative Colitis | EGR2         |
| GeneCards | Ulcerative Colitis | ZFP91        |
| GeneCards | Ulcerative Colitis | CSNK2B       |
| GeneCards | Ulcerative Colitis | BRD2         |
| GeneCards | Ulcerative Colitis | HLA-DMB      |
| GeneCards | Ulcerative Colitis | B3GALT4      |
| GeneCards | Ulcerative Colitis | HLA-DOB      |
| GeneCards | Ulcerative Colitis | ATF6B        |
| GeneCards | Ulcerative Colitis | VPS52        |
| GeneCards | Ulcerative Colitis | CYP21A1P     |
| GeneCards | Ulcerative Colitis | HLA-DRB6     |
| GeneCards | Ulcerative Colitis | HLA-DQB1-AS1 |
| GeneCards | Ulcerative Colitis | HLA-DQB2     |
| GeneCards | Ulcerative Colitis | APOB         |
| GeneCards | Ulcerative Colitis | CXCR6        |
| GeneCards | Ulcerative Colitis | PRKAA1       |
| GeneCards | Ulcerative Colitis | MLANA        |
| GeneCards | Ulcerative Colitis | DDB1         |
| GeneCards | Ulcerative Colitis | SCD          |
| GeneCards | Ulcerative Colitis | HADH         |
| GeneCards | Ulcerative Colitis | KCNA3        |
| GeneCards | Ulcerative Colitis | OVGP1        |
| GeneCards | Ulcerative Colitis | ACAP1        |
| GeneCards | Ulcerative Colitis | SSRP1        |
| GeneCards | Ulcerative Colitis | IRF7         |
| GeneCards | Ulcerative Colitis | KCNN1        |
| GeneCards | Ulcerative Colitis | ZFP36        |
| GeneCards | Ulcerative Colitis | CUX1         |
| GeneCards | Ulcerative Colitis | CHRNA5       |
| GeneCards | Ulcerative Colitis | CBR3-AS1     |
| GeneCards | Ulcerative Colitis | NFATC2       |
| GeneCards | Ulcerative Colitis | SLPI         |
| GeneCards | Ulcerative Colitis | RETNLB       |
| GeneCards | Ulcerative Colitis | CRNDE        |
| GeneCards | Ulcerative Colitis | SPI1         |
| GeneCards | Ulcerative Colitis | IL9R         |
| GeneCards | Ulcerative Colitis | MIR375       |
| GeneCards | Ulcerative Colitis | CHD8         |
| GeneCards | Ulcerative Colitis | SDC2         |

|           |                    |                 |
|-----------|--------------------|-----------------|
| GeneCards | Ulcerative Colitis | ATP1A1          |
| GeneCards | Ulcerative Colitis | HIC1            |
| GeneCards | Ulcerative Colitis | MX1             |
| GeneCards | Ulcerative Colitis | NRBF2           |
| GeneCards | Ulcerative Colitis | MIR181A2        |
| GeneCards | Ulcerative Colitis | NTN1            |
| GeneCards | Ulcerative Colitis | FAF1            |
| GeneCards | Ulcerative Colitis | RAG1            |
| GeneCards | Ulcerative Colitis | RAB5B           |
| GeneCards | Ulcerative Colitis | RBM5            |
| GeneCards | Ulcerative Colitis | KLHDC8B         |
| GeneCards | Ulcerative Colitis | RBM6            |
| GeneCards | Ulcerative Colitis | NICN1           |
| GeneCards | Ulcerative Colitis | IHO1            |
| GeneCards | Ulcerative Colitis | INKA1           |
| GeneCards | Ulcerative Colitis | HCG27           |
| GeneCards | Ulcerative Colitis | MIR4456         |
| GeneCards | Ulcerative Colitis | LOC105447645    |
| GeneCards | Ulcerative Colitis | ENSG00000271581 |
| GeneCards | Ulcerative Colitis | MK280269-056    |
| GeneCards | Ulcerative Colitis | MN298114-181    |
| GeneCards | Ulcerative Colitis | PYCARD          |
| GeneCards | Ulcerative Colitis | PFKFB3          |
| GeneCards | Ulcerative Colitis | LPAR5           |
| GeneCards | Ulcerative Colitis | SLC9A8          |
| GeneCards | Ulcerative Colitis | SGK1            |
| GeneCards | Ulcerative Colitis | TOP2A           |
| GeneCards | Ulcerative Colitis | DDIT3           |
| GeneCards | Ulcerative Colitis | MTA1            |
| GeneCards | Ulcerative Colitis | CDKN3           |
| GeneCards | Ulcerative Colitis | GSK3B           |
| GeneCards | Ulcerative Colitis | PIK3R3          |
| GeneCards | Ulcerative Colitis | UCHL1           |
| GeneCards | Ulcerative Colitis | OGG1            |
| GeneCards | Ulcerative Colitis | LYVE1           |
| GeneCards | Ulcerative Colitis | PROX1           |
| GeneCards | Ulcerative Colitis | STX3            |
| GeneCards | Ulcerative Colitis | ARRB2           |
| GeneCards | Ulcerative Colitis | TNFAIP6         |
| GeneCards | Ulcerative Colitis | SELENOP         |
| GeneCards | Ulcerative Colitis | CARD14          |
| GeneCards | Ulcerative Colitis | SAA1            |
| GeneCards | Ulcerative Colitis | MIR130A         |
| GeneCards | Ulcerative Colitis | MAP3K11         |

|           |                    |          |
|-----------|--------------------|----------|
| GeneCards | Ulcerative Colitis | SKI      |
| GeneCards | Ulcerative Colitis | C19orf33 |
| GeneCards | Ulcerative Colitis | FOXP2    |
| GeneCards | Ulcerative Colitis | CSE1L    |
| GeneCards | Ulcerative Colitis | MON1A    |
| GeneCards | Ulcerative Colitis | DBH      |
| GeneCards | Ulcerative Colitis | FSCN1    |
| GeneCards | Ulcerative Colitis | C5AR1    |
| GeneCards | Ulcerative Colitis | XPC      |
| GeneCards | Ulcerative Colitis | EFEMP2   |
| GeneCards | Ulcerative Colitis | POLR1C   |
| GeneCards | Ulcerative Colitis | MYT1L    |
| GeneCards | Ulcerative Colitis | SLC39A7  |
| GeneCards | Ulcerative Colitis | DNMT3L   |
| GeneCards | Ulcerative Colitis | RPL3     |
| GeneCards | Ulcerative Colitis | SLC35D1  |
| GeneCards | Ulcerative Colitis | CTNNA3   |
| GeneCards | Ulcerative Colitis | EMG1     |
| GeneCards | Ulcerative Colitis | HMGN1    |
| GeneCards | Ulcerative Colitis | AAGAB    |
| GeneCards | Ulcerative Colitis | FNBP1    |
| GeneCards | Ulcerative Colitis | ARFRP1   |
| GeneCards | Ulcerative Colitis | INO80    |
| GeneCards | Ulcerative Colitis | PGAP3    |
| GeneCards | Ulcerative Colitis | NCKIPSD  |
| GeneCards | Ulcerative Colitis | NOP2     |
| GeneCards | Ulcerative Colitis | ZNF341   |
| GeneCards | Ulcerative Colitis | MTERF4   |
| GeneCards | Ulcerative Colitis | ZNRD2    |
| GeneCards | Ulcerative Colitis | CCDC26   |
| GeneCards | Ulcerative Colitis | PHETA1   |
| GeneCards | Ulcerative Colitis | NAMPT    |
| GeneCards | Ulcerative Colitis | TUFM     |
| GeneCards | Ulcerative Colitis | PLA2G3   |
| GeneCards | Ulcerative Colitis | IFI27    |
| GeneCards | Ulcerative Colitis | WAKMAR2  |
| GeneCards | Ulcerative Colitis | CDC37    |
| GeneCards | Ulcerative Colitis | CMA1     |
| GeneCards | Ulcerative Colitis | FCN2     |
| GeneCards | Ulcerative Colitis | RAC2     |
| GeneCards | Ulcerative Colitis | CERS2    |
| GeneCards | Ulcerative Colitis | UBAP2L   |
| GeneCards | Ulcerative Colitis | DUSP1    |
| GeneCards | Ulcerative Colitis | CA9      |

|           |                    |           |
|-----------|--------------------|-----------|
| GeneCards | Ulcerative Colitis | HOTAIR    |
| GeneCards | Ulcerative Colitis | KRT9      |
| GeneCards | Ulcerative Colitis | SH2B3     |
| GeneCards | Ulcerative Colitis | AMT       |
| GeneCards | Ulcerative Colitis | ATG5      |
| GeneCards | Ulcerative Colitis | CDK12     |
| GeneCards | Ulcerative Colitis | CTDP1     |
| GeneCards | Ulcerative Colitis | GRB7      |
| GeneCards | Ulcerative Colitis | PHB2      |
| GeneCards | Ulcerative Colitis | CCNT1     |
| GeneCards | Ulcerative Colitis | IL22RA1   |
| GeneCards | Ulcerative Colitis | SLC25A28  |
| GeneCards | Ulcerative Colitis | OAZ3      |
| GeneCards | Ulcerative Colitis | MIR611    |
| GeneCards | Ulcerative Colitis | MIR3936HG |
| GeneCards | Ulcerative Colitis | CCR5AS    |
| GeneCards | Ulcerative Colitis | LRRC56    |
| GeneCards | Ulcerative Colitis | RBX1      |
| GeneCards | Ulcerative Colitis | ITGB6     |
| GeneCards | Ulcerative Colitis | TNK2      |
| GeneCards | Ulcerative Colitis | EXOSC1    |
| GeneCards | Ulcerative Colitis | P2RY12    |
| GeneCards | Ulcerative Colitis | TYRP1     |
| GeneCards | Ulcerative Colitis | IGF2R     |
| GeneCards | Ulcerative Colitis | GSDME     |
| GeneCards | Ulcerative Colitis | MIR29B2   |
| GeneCards | Ulcerative Colitis | RO60      |
| GeneCards | Ulcerative Colitis | LIG4      |
| GeneCards | Ulcerative Colitis | PSMG1     |
| GeneCards | Ulcerative Colitis | STUB1     |
| GeneCards | Ulcerative Colitis | CX3CL1    |
| GeneCards | Ulcerative Colitis | BMP2      |
| GeneCards | Ulcerative Colitis | LCT       |
| GeneCards | Ulcerative Colitis | NFATC3    |
| GeneCards | Ulcerative Colitis | GSDMD     |
| GeneCards | Ulcerative Colitis | C7        |
| GeneCards | Ulcerative Colitis | SIGLEC5   |
| GeneCards | Ulcerative Colitis | MIR335    |
| GeneCards | Ulcerative Colitis | RARB      |
| GeneCards | Ulcerative Colitis | IL1RAPL1  |
| GeneCards | Ulcerative Colitis | GGT6      |
| GeneCards | Ulcerative Colitis | NELL1     |
| GeneCards | Ulcerative Colitis | CTSL      |
| GeneCards | Ulcerative Colitis | DNTT      |

|           |                    |           |
|-----------|--------------------|-----------|
| GeneCards | Ulcerative Colitis | PHEX      |
| GeneCards | Ulcerative Colitis | FTCD      |
| GeneCards | Ulcerative Colitis | GHSR      |
| GeneCards | Ulcerative Colitis | LAMP2     |
| GeneCards | Ulcerative Colitis | ALCAM     |
| GeneCards | Ulcerative Colitis | RXRA      |
| GeneCards | Ulcerative Colitis | BMP4      |
| GeneCards | Ulcerative Colitis | FUT4      |
| GeneCards | Ulcerative Colitis | ALDH9A1   |
| GeneCards | Ulcerative Colitis | DGKA      |
| GeneCards | Ulcerative Colitis | CSNK2A1   |
| GeneCards | Ulcerative Colitis | CDC25C    |
| GeneCards | Ulcerative Colitis | KDM1A     |
| GeneCards | Ulcerative Colitis | LEF1      |
| GeneCards | Ulcerative Colitis | DLL1      |
| GeneCards | Ulcerative Colitis | JAG2      |
| GeneCards | Ulcerative Colitis | RAN       |
| GeneCards | Ulcerative Colitis | PDPN      |
| GeneCards | Ulcerative Colitis | PTTG1     |
| GeneCards | Ulcerative Colitis | UHRF1     |
| GeneCards | Ulcerative Colitis | RMI1      |
| GeneCards | Ulcerative Colitis | MIR10A    |
| GeneCards | Ulcerative Colitis | TLE1      |
| GeneCards | Ulcerative Colitis | SUN2      |
| GeneCards | Ulcerative Colitis | WNT3A     |
| GeneCards | Ulcerative Colitis | EPHA2     |
| GeneCards | Ulcerative Colitis | ERBB3     |
| GeneCards | Ulcerative Colitis | FANCC     |
| GeneCards | Ulcerative Colitis | FANCE     |
| GeneCards | Ulcerative Colitis | SPRY4-IT1 |
| GeneCards | Ulcerative Colitis | COPS5     |
| GeneCards | Ulcerative Colitis | IL17RB    |
| GeneCards | Ulcerative Colitis | PHOX2B    |
| GeneCards | Ulcerative Colitis | TST       |
| GeneCards | Ulcerative Colitis | EIF3C     |
| GeneCards | Ulcerative Colitis | NUPR1     |
| GeneCards | Ulcerative Colitis | MUC13     |
| GeneCards | Ulcerative Colitis | SLAMF7    |
| GeneCards | Ulcerative Colitis | NINJ1     |
| GeneCards | Ulcerative Colitis | DANCR     |
| GeneCards | Ulcerative Colitis | FBXW4     |
| GeneCards | Ulcerative Colitis | CD47      |
| GeneCards | Ulcerative Colitis | MIR452    |
| GeneCards | Ulcerative Colitis | USP7      |



|           |                    |                 |
|-----------|--------------------|-----------------|
| GeneCards | Ulcerative Colitis | MIR135A1        |
| GeneCards | Ulcerative Colitis | MIR328          |
| GeneCards | Ulcerative Colitis | MIRLET7B        |
| GeneCards | Ulcerative Colitis | MIR103A1        |
| GeneCards | Ulcerative Colitis | MAPK10          |
| GeneCards | Ulcerative Colitis | ASAH1           |
| GeneCards | Ulcerative Colitis | HHIP            |
| GeneCards | Ulcerative Colitis | ITGAV           |
| GeneCards | Ulcerative Colitis | WIF1            |
| GeneCards | Ulcerative Colitis | ETV6            |
| GeneCards | Ulcerative Colitis | CXCL16          |
| GeneCards | Ulcerative Colitis | MIR219A1        |
| GeneCards | Ulcerative Colitis | DDAH2           |
| GeneCards | Ulcerative Colitis | KIFC1           |
| GeneCards | Ulcerative Colitis | PPT2            |
| GeneCards | Ulcerative Colitis | FKBPL           |
| GeneCards | Ulcerative Colitis | WDR46           |
| GeneCards | Ulcerative Colitis | EGFL8           |
| GeneCards | Ulcerative Colitis | NELFE           |
| GeneCards | Ulcerative Colitis | SAPCD1          |
| GeneCards | Ulcerative Colitis | HCG25           |
| GeneCards | Ulcerative Colitis | HSALNG0049429   |
| GeneCards | Ulcerative Colitis | NONHSAG045982.2 |
| GeneCards | Ulcerative Colitis | LOC124901301    |
| GeneCards | Ulcerative Colitis | DSC2            |
| GeneCards | Ulcerative Colitis | POLR2B          |
| GeneCards | Ulcerative Colitis | MIR99A          |
| GeneCards | Ulcerative Colitis | MYDGF           |
| GeneCards | Ulcerative Colitis | FERMT3          |
| GeneCards | Ulcerative Colitis | FERMT2          |
| GeneCards | Ulcerative Colitis | PTPN1           |
| GeneCards | Ulcerative Colitis | ADRA1B          |
| GeneCards | Ulcerative Colitis | CRB1            |
| GeneCards | Ulcerative Colitis | TNXB            |
| GeneCards | Ulcerative Colitis | CDSN            |
| GeneCards | Ulcerative Colitis | PIP5K1A         |
| GeneCards | Ulcerative Colitis | ATP6V1F         |
| GeneCards | Ulcerative Colitis | THBS3           |
| GeneCards | Ulcerative Colitis | ABCF1           |
| GeneCards | Ulcerative Colitis | DHX16           |
| GeneCards | Ulcerative Colitis | ATP8B2          |
| GeneCards | Ulcerative Colitis | CCDC8           |
| GeneCards | Ulcerative Colitis | DPM3            |
| GeneCards | Ulcerative Colitis | FLAD1           |

|           |                    |            |
|-----------|--------------------|------------|
| GeneCards | Ulcerative Colitis | LSM2       |
| GeneCards | Ulcerative Colitis | NSMCE2     |
| GeneCards | Ulcerative Colitis | PPP1R10    |
| GeneCards | Ulcerative Colitis | RNF114     |
| GeneCards | Ulcerative Colitis | ZFP57      |
| GeneCards | Ulcerative Colitis | PYGO2      |
| GeneCards | Ulcerative Colitis | TCF19      |
| GeneCards | Ulcerative Colitis | GNL1       |
| GeneCards | Ulcerative Colitis | UBE2Q1     |
| GeneCards | Ulcerative Colitis | ZNF687     |
| GeneCards | Ulcerative Colitis | LRRC2      |
| GeneCards | Ulcerative Colitis | GON4L      |
| GeneCards | Ulcerative Colitis | KRTCAP2    |
| GeneCards | Ulcerative Colitis | RPP21      |
| GeneCards | Ulcerative Colitis | ZBTB12     |
| GeneCards | Ulcerative Colitis | ATAT1      |
| GeneCards | Ulcerative Colitis | PRR3       |
| GeneCards | Ulcerative Colitis | LY6G5B     |
| GeneCards | Ulcerative Colitis | OSGIN2     |
| GeneCards | Ulcerative Colitis | PSORS1C2   |
| GeneCards | Ulcerative Colitis | C6orf47    |
| GeneCards | Ulcerative Colitis | FCMR       |
| GeneCards | Ulcerative Colitis | HLA-H      |
| GeneCards | Ulcerative Colitis | KHDC4      |
| GeneCards | Ulcerative Colitis | RUSC1-AS1  |
| GeneCards | Ulcerative Colitis | DELEC1     |
| GeneCards | Ulcerative Colitis | HCG22      |
| GeneCards | Ulcerative Colitis | SPATA48    |
| GeneCards | Ulcerative Colitis | HLA-J      |
| GeneCards | Ulcerative Colitis | HCG18      |
| GeneCards | Ulcerative Colitis | HCG4B      |
| GeneCards | Ulcerative Colitis | HLA-F-AS1  |
| GeneCards | Ulcerative Colitis | ZNRD1ASP   |
| GeneCards | Ulcerative Colitis | ASH1L-AS1  |
| GeneCards | Ulcerative Colitis | GBAP1      |
| GeneCards | Ulcerative Colitis | HLA-L      |
| GeneCards | Ulcerative Colitis | TPI1P2     |
| GeneCards | Ulcerative Colitis | HLA-K      |
| GeneCards | Ulcerative Colitis | LINC01271  |
| GeneCards | Ulcerative Colitis | LINC01273  |
| GeneCards | Ulcerative Colitis | TRIM31-AS1 |
| GeneCards | Ulcerative Colitis | FLNC-AS1   |
| GeneCards | Ulcerative Colitis | LOC285626  |
| GeneCards | Ulcerative Colitis | MICD       |

|           |                    |                 |
|-----------|--------------------|-----------------|
| GeneCards | Ulcerative Colitis | HLA-W           |
| GeneCards | Ulcerative Colitis | LINC02009       |
| GeneCards | Ulcerative Colitis | PSMB8-AS1       |
| GeneCards | Ulcerative Colitis | UQCRHP1         |
| GeneCards | Ulcerative Colitis | WASHC5-AS1      |
| GeneCards | Ulcerative Colitis | HLA-U           |
| GeneCards | Ulcerative Colitis | LINC01845       |
| GeneCards | Ulcerative Colitis | LINC02539       |
| GeneCards | Ulcerative Colitis | MICE            |
| GeneCards | Ulcerative Colitis | RIPK2-DT        |
| GeneCards | Ulcerative Colitis | RPL23AP1        |
| GeneCards | Ulcerative Colitis | RPL3P2          |
| GeneCards | Ulcerative Colitis | TSBP1-AS1       |
| GeneCards | Ulcerative Colitis | LINC02132       |
| GeneCards | Ulcerative Colitis | PAIP1P1         |
| GeneCards | Ulcerative Colitis | STK19B          |
| GeneCards | Ulcerative Colitis | COX6B1P6        |
| GeneCards | Ulcerative Colitis | ENSG00000235620 |
| GeneCards | Ulcerative Colitis | ENSG00000269667 |
| GeneCards | Ulcerative Colitis | ENSG00000270120 |
| GeneCards | Ulcerative Colitis | ENSG00000271380 |
| GeneCards | Ulcerative Colitis | ENSG00000271553 |
| GeneCards | Ulcerative Colitis | ENSG00000272540 |
| GeneCards | Ulcerative Colitis | RN7SL636P       |
| GeneCards | Ulcerative Colitis | UQCRC2P1        |
| GeneCards | Ulcerative Colitis | ENSG00000285163 |
| GeneCards | Ulcerative Colitis | RN7SKP211       |
| GeneCards | Ulcerative Colitis | ENSG00000199349 |
| GeneCards | Ulcerative Colitis | ENSG00000242162 |
| GeneCards | Ulcerative Colitis | ENSG00000271267 |
| GeneCards | Ulcerative Colitis | ENSG00000285040 |
| GeneCards | Ulcerative Colitis | TRL-AAG6-1      |
| GeneCards | Ulcerative Colitis | lnc-IKZF1-6     |
| GeneCards | Ulcerative Colitis | ENSG00000224163 |
| GeneCards | Ulcerative Colitis | ENSG00000227766 |
| GeneCards | Ulcerative Colitis | ENSG00000230521 |
| GeneCards | Ulcerative Colitis | ENSG00000237669 |
| GeneCards | Ulcerative Colitis | HSALNG0061260   |
| GeneCards | Ulcerative Colitis | HSALNG0061261   |
| GeneCards | Ulcerative Colitis | RF00005-109     |
| GeneCards | Ulcerative Colitis | lnc-IRF5-3      |
| GeneCards | Ulcerative Colitis | HSALNG0049239   |
| GeneCards | Ulcerative Colitis | HSALNG0066829   |
| GeneCards | Ulcerative Colitis | HSALNG0130758   |

|           |                    |                 |
|-----------|--------------------|-----------------|
| GeneCards | Ulcerative Colitis | NONHSAG019426.2 |
| GeneCards | Ulcerative Colitis | piR-56133-186   |
| GeneCards | Ulcerative Colitis | LOC124903741    |
| GeneCards | Ulcerative Colitis | TCN1            |
| GeneCards | Ulcerative Colitis | DAG1            |
| GeneCards | Ulcerative Colitis | SLIT1           |
| GeneCards | Ulcerative Colitis | SYNGR1          |
| GeneCards | Ulcerative Colitis | CDH22           |
| GeneCards | Ulcerative Colitis | CCL8            |
| GeneCards | Ulcerative Colitis | TENM3           |
| GeneCards | Ulcerative Colitis | ITLN2           |
| GeneCards | Ulcerative Colitis | CTIF            |
| GeneCards | Ulcerative Colitis | PRRT1           |
| GeneCards | Ulcerative Colitis | PROX2           |
| GeneCards | Ulcerative Colitis | SNHG32          |
| GeneCards | Ulcerative Colitis | PA2G4           |
| GeneCards | Ulcerative Colitis | UCP2            |
| GeneCards | Ulcerative Colitis | CD300LF         |
| GeneCards | Ulcerative Colitis | MIR346          |
| GeneCards | Ulcerative Colitis | REEP6           |
| GeneCards | Ulcerative Colitis | ITGA1           |
| GeneCards | Ulcerative Colitis | SESN2           |
| GeneCards | Ulcerative Colitis | KCNMA1          |
| GeneCards | Ulcerative Colitis | CSK             |
| GeneCards | Ulcerative Colitis | MIR23A          |
| GeneCards | Ulcerative Colitis | MIRLET7G        |
| GeneCards | Ulcerative Colitis | HEIH            |
| GeneCards | Ulcerative Colitis | ACVR2A          |
| GeneCards | Ulcerative Colitis | TMEM258         |
| GeneCards | Ulcerative Colitis | NME1            |
| GeneCards | Ulcerative Colitis | BID             |
| GeneCards | Ulcerative Colitis | UCA1            |
| GeneCards | Ulcerative Colitis | PTENP1          |
| GeneCards | Ulcerative Colitis | CARD16          |
| GeneCards | Ulcerative Colitis | LY96            |
| GeneCards | Ulcerative Colitis | KLF1            |
| GeneCards | Ulcerative Colitis | UGT1A9          |
| GeneCards | Ulcerative Colitis | MIR29C          |
| GeneCards | Ulcerative Colitis | CLSTN2          |
| GeneCards | Ulcerative Colitis | ARHGEF6         |
| GeneCards | Ulcerative Colitis | SCGN            |
| GeneCards | Ulcerative Colitis | BRD4            |
| GeneCards | Ulcerative Colitis | NR2C2AP         |
| GeneCards | Ulcerative Colitis | H2AC21          |

|           |                    |           |
|-----------|--------------------|-----------|
| GeneCards | Ulcerative Colitis | KLF5      |
| GeneCards | Ulcerative Colitis | FZD7      |
| GeneCards | Ulcerative Colitis | BCL2L15   |
| GeneCards | Ulcerative Colitis | APOBEC3G  |
| GeneCards | Ulcerative Colitis | ANKH      |
| GeneCards | Ulcerative Colitis | TBX20     |
| GeneCards | Ulcerative Colitis | LIN54     |
| GeneCards | Ulcerative Colitis | ZNF354A   |
| GeneCards | Ulcerative Colitis | USP50     |
| GeneCards | Ulcerative Colitis | FRG2C     |
| GeneCards | Ulcerative Colitis | IGFBP7    |
| GeneCards | Ulcerative Colitis | CDH13     |
| GeneCards | Ulcerative Colitis | FOXM1     |
| GeneCards | Ulcerative Colitis | ST6GAL1   |
| GeneCards | Ulcerative Colitis | CLCA1     |
| GeneCards | Ulcerative Colitis | EREG      |
| GeneCards | Ulcerative Colitis | CR1       |
| GeneCards | Ulcerative Colitis | MIR1185-1 |
| GeneCards | Ulcerative Colitis | MIR1233-1 |
| GeneCards | Ulcerative Colitis | MIR6086   |
| GeneCards | Ulcerative Colitis | MIR30E    |
| GeneCards | Ulcerative Colitis | CDX1      |
| GeneCards | Ulcerative Colitis | MAP2K3    |
| GeneCards | Ulcerative Colitis | UMPS      |
| GeneCards | Ulcerative Colitis | CD82      |
| GeneCards | Ulcerative Colitis | WNT9A     |
| GeneCards | Ulcerative Colitis | HOTTIP    |
| GeneCards | Ulcerative Colitis | CD63      |
| GeneCards | Ulcerative Colitis | KRT38     |
| GeneCards | Ulcerative Colitis | OXTR      |
| GeneCards | Ulcerative Colitis | SLC6A8    |
| GeneCards | Ulcerative Colitis | DIABLO    |
| GeneCards | Ulcerative Colitis | FANCI     |
| GeneCards | Ulcerative Colitis | TIMP4     |
| GeneCards | Ulcerative Colitis | CCND3     |
| GeneCards | Ulcerative Colitis | TBP       |
| GeneCards | Ulcerative Colitis | HSPB3     |
| GeneCards | Ulcerative Colitis | MT1E      |
| GeneCards | Ulcerative Colitis | PAQR7     |
| GeneCards | Ulcerative Colitis | FBXW2     |
| GeneCards | Ulcerative Colitis | KLHL24    |
| GeneCards | Ulcerative Colitis | ATP5F1E   |
| GeneCards | Ulcerative Colitis | CCDC65    |
| GeneCards | Ulcerative Colitis | PSMA6     |

|           |                    |              |
|-----------|--------------------|--------------|
| GeneCards | Ulcerative Colitis | DYRK2        |
| GeneCards | Ulcerative Colitis | CUL2         |
| GeneCards | Ulcerative Colitis | USP20        |
| GeneCards | Ulcerative Colitis | TRIM26       |
| GeneCards | Ulcerative Colitis | COG2         |
| GeneCards | Ulcerative Colitis | UBASH3A      |
| GeneCards | Ulcerative Colitis | BRMS1        |
| GeneCards | Ulcerative Colitis | IKZF2        |
| GeneCards | Ulcerative Colitis | TRIM39-RPP21 |
| GeneCards | Ulcerative Colitis | FAS-AS1      |
| GeneCards | Ulcerative Colitis | YWHAZ        |
| GeneCards | Ulcerative Colitis | CUL4A        |
| GeneCards | Ulcerative Colitis | CUL4B        |
| GeneCards | Ulcerative Colitis | DNA2         |
| GeneCards | Ulcerative Colitis | NEIL2        |
| GeneCards | Ulcerative Colitis | MTMR12       |
| GeneCards | Ulcerative Colitis | NOP58        |
| GeneCards | Ulcerative Colitis | BCL7C        |
| GeneCards | Ulcerative Colitis | TRIM22       |
| GeneCards | Ulcerative Colitis | MARCKS       |
| GeneCards | Ulcerative Colitis | RPL6         |
| GeneCards | Ulcerative Colitis | FBP1         |
| GeneCards | Ulcerative Colitis | ADSL         |
| GeneCards | Ulcerative Colitis | PHKA2        |
| GeneCards | Ulcerative Colitis | BCAM         |
| GeneCards | Ulcerative Colitis | PLXDC2       |
| GeneCards | Ulcerative Colitis | TASP1        |
| GeneCards | Ulcerative Colitis | PPARD        |
| GeneCards | Ulcerative Colitis | PPARGC1A     |
| GeneCards | Ulcerative Colitis | GCNT3        |
| GeneCards | Ulcerative Colitis | DKK1         |
| GeneCards | Ulcerative Colitis | GADD45A      |
| GeneCards | Ulcerative Colitis | MIR133B      |
| GeneCards | Ulcerative Colitis | FBXO11       |
| GeneCards | Ulcerative Colitis | NDRG2        |
| GeneCards | Ulcerative Colitis | APLN         |
| GeneCards | Ulcerative Colitis | BLOC1S1      |
| GeneCards | Ulcerative Colitis | CST3         |
| GeneCards | Ulcerative Colitis | HLA-DRB4     |
| GeneCards | Ulcerative Colitis | HRH4         |
| GeneCards | Ulcerative Colitis | EDN2         |
| GeneCards | Ulcerative Colitis | TNPO1        |
| GeneCards | Ulcerative Colitis | RPN2         |
| GeneCards | Ulcerative Colitis | CSNK1A1      |

|           |                    |          |
|-----------|--------------------|----------|
| GeneCards | Ulcerative Colitis | MAPK13   |
| GeneCards | Ulcerative Colitis | PRMT1    |
| GeneCards | Ulcerative Colitis | AXIN1    |
| GeneCards | Ulcerative Colitis | MAPK12   |
| GeneCards | Ulcerative Colitis | NUMB     |
| GeneCards | Ulcerative Colitis | MCM7     |
| GeneCards | Ulcerative Colitis | TPBG     |
| GeneCards | Ulcerative Colitis | CDK6     |
| GeneCards | Ulcerative Colitis | WNT5A    |
| GeneCards | Ulcerative Colitis | PLA2G6   |
| GeneCards | Ulcerative Colitis | SOS1     |
| GeneCards | Ulcerative Colitis | ARAF     |
| GeneCards | Ulcerative Colitis | NRP2     |
| GeneCards | Ulcerative Colitis | WNT10A   |
| GeneCards | Ulcerative Colitis | BAD      |
| GeneCards | Ulcerative Colitis | DVL3     |
| GeneCards | Ulcerative Colitis | FABP4    |
| GeneCards | Ulcerative Colitis | PTPN13   |
| GeneCards | Ulcerative Colitis | SOX17    |
| GeneCards | Ulcerative Colitis | MIR137   |
| GeneCards | Ulcerative Colitis | MIR129-2 |
| GeneCards | Ulcerative Colitis | MFSD2A   |
| GeneCards | Ulcerative Colitis | DCLRE1B  |
| GeneCards | Ulcerative Colitis | MIR186   |
| GeneCards | Ulcerative Colitis | BIN1     |
| GeneCards | Ulcerative Colitis | CCND2    |
| GeneCards | Ulcerative Colitis | ZEB2     |
| GeneCards | Ulcerative Colitis | S100A4   |
| GeneCards | Ulcerative Colitis | SAT1     |
| GeneCards | Ulcerative Colitis | WNT2B    |
| GeneCards | Ulcerative Colitis | CDH17    |
| GeneCards | Ulcerative Colitis | HAVCR1   |
| GeneCards | Ulcerative Colitis | TPX2     |
| GeneCards | Ulcerative Colitis | WNT6     |
| GeneCards | Ulcerative Colitis | CD276    |
| GeneCards | Ulcerative Colitis | HLTF     |
| GeneCards | Ulcerative Colitis | MTDH     |
| GeneCards | Ulcerative Colitis | CLDN23   |
| GeneCards | Ulcerative Colitis | PSG2     |
| GeneCards | Ulcerative Colitis | H4-16    |
| GeneCards | Ulcerative Colitis | CASC2    |
| GeneCards | Ulcerative Colitis | XIST     |
| GeneCards | Ulcerative Colitis | FER1L4   |
| GeneCards | Ulcerative Colitis | SNHG12   |

|           |                    |            |
|-----------|--------------------|------------|
| GeneCards | Ulcerative Colitis | SOX2-OT    |
| GeneCards | Ulcerative Colitis | HULC       |
| GeneCards | Ulcerative Colitis | SNHG5      |
| GeneCards | Ulcerative Colitis | TINCR      |
| GeneCards | Ulcerative Colitis | MIR107     |
| GeneCards | Ulcerative Colitis | MIR125B1   |
| GeneCards | Ulcerative Colitis | SNHG1      |
| GeneCards | Ulcerative Colitis | LINC00261  |
| GeneCards | Ulcerative Colitis | MIR345     |
| GeneCards | Ulcerative Colitis | SNHG16     |
| GeneCards | Ulcerative Colitis | ZFAS1      |
| GeneCards | Ulcerative Colitis | BCYRN1     |
| GeneCards | Ulcerative Colitis | HOXA-AS2   |
| GeneCards | Ulcerative Colitis | MIR130B    |
| GeneCards | Ulcerative Colitis | SNHG6      |
| GeneCards | Ulcerative Colitis | BCAR4      |
| GeneCards | Ulcerative Colitis | HNF1A-AS1  |
| GeneCards | Ulcerative Colitis | MIR296     |
| GeneCards | Ulcerative Colitis | MIR31HG    |
| GeneCards | Ulcerative Colitis | PCAT1      |
| GeneCards | Ulcerative Colitis | SNHG20     |
| GeneCards | Ulcerative Colitis | AFAP1-AS1  |
| GeneCards | Ulcerative Colitis | LINC-ROR   |
| GeneCards | Ulcerative Colitis | MIR532     |
| GeneCards | Ulcerative Colitis | TUSC7      |
| GeneCards | Ulcerative Colitis | CCAT1      |
| GeneCards | Ulcerative Colitis | FEZF1-AS1  |
| GeneCards | Ulcerative Colitis | RPL34-DT   |
| GeneCards | Ulcerative Colitis | GAPLINC    |
| GeneCards | Ulcerative Colitis | BANCR      |
| GeneCards | Ulcerative Colitis | CCAT2      |
| GeneCards | Ulcerative Colitis | PRNCR1     |
| GeneCards | Ulcerative Colitis | TMEM238L   |
| GeneCards | Ulcerative Colitis | BLACAT1    |
| GeneCards | Ulcerative Colitis | GHET1      |
| GeneCards | Ulcerative Colitis | NCRUPAR    |
| GeneCards | Ulcerative Colitis | NPTN-IT1   |
| GeneCards | Ulcerative Colitis | PANDAR     |
| GeneCards | Ulcerative Colitis | DUXAP9     |
| GeneCards | Ulcerative Colitis | TP53COR1   |
| GeneCards | Ulcerative Colitis | LNCRNA-ATB |
| GeneCards | Ulcerative Colitis | PAH        |
| GeneCards | Ulcerative Colitis | DCT        |
| GeneCards | Ulcerative Colitis | BLZF1      |



|           |                    |          |
|-----------|--------------------|----------|
| GeneCards | Ulcerative Colitis | OPRM1    |
| GeneCards | Ulcerative Colitis | SELENOS  |
| GeneCards | Ulcerative Colitis | GDNF     |
| GeneCards | Ulcerative Colitis | CTSE     |
| GeneCards | Ulcerative Colitis | HCK      |
| GeneCards | Ulcerative Colitis | RNASET2  |
| GeneCards | Ulcerative Colitis | NFIL3    |
| GeneCards | Ulcerative Colitis | POP4     |
| GeneCards | Ulcerative Colitis | GC       |
| GeneCards | Ulcerative Colitis | MMP28    |
| GeneCards | Ulcerative Colitis | NPY      |
| GeneCards | Ulcerative Colitis | BMP7     |
| GeneCards | Ulcerative Colitis | SMPD1    |
| GeneCards | Ulcerative Colitis | IL34     |
| GeneCards | Ulcerative Colitis | MYO5B    |
| GeneCards | Ulcerative Colitis | FCN1     |
| GeneCards | Ulcerative Colitis | CAMK2A   |
| GeneCards | Ulcerative Colitis | RAD50    |
| GeneCards | Ulcerative Colitis | CACNA1S  |
| GeneCards | Ulcerative Colitis | CTSF     |
| GeneCards | Ulcerative Colitis | CIT      |
| GeneCards | Ulcerative Colitis | IMPDH2   |
| GeneCards | Ulcerative Colitis | SCNN1A   |
| GeneCards | Ulcerative Colitis | CEBPA    |
| GeneCards | Ulcerative Colitis | GALT     |
| GeneCards | Ulcerative Colitis | LAMB2    |
| GeneCards | Ulcerative Colitis | PDXK     |
| GeneCards | Ulcerative Colitis | PPP1CB   |
| GeneCards | Ulcerative Colitis | PRKAB1   |
| GeneCards | Ulcerative Colitis | PTGIS    |
| GeneCards | Ulcerative Colitis | CAST     |
| GeneCards | Ulcerative Colitis | CD81     |
| GeneCards | Ulcerative Colitis | CHRNA2   |
| GeneCards | Ulcerative Colitis | DOT1L    |
| GeneCards | Ulcerative Colitis | HINT1    |
| GeneCards | Ulcerative Colitis | IL11RA   |
| GeneCards | Ulcerative Colitis | PRKAR2A  |
| GeneCards | Ulcerative Colitis | PRKD2    |
| GeneCards | Ulcerative Colitis | PTPRK    |
| GeneCards | Ulcerative Colitis | SLC25A20 |
| GeneCards | Ulcerative Colitis | ANXA11   |
| GeneCards | Ulcerative Colitis | KAT6B    |
| GeneCards | Ulcerative Colitis | MPDZ     |
| GeneCards | Ulcerative Colitis | POFUT1   |

|           |                    |          |
|-----------|--------------------|----------|
| GeneCards | Ulcerative Colitis | PPIF     |
| GeneCards | Ulcerative Colitis | RAPGEF3  |
| GeneCards | Ulcerative Colitis | ADAMTS4  |
| GeneCards | Ulcerative Colitis | EMP2     |
| GeneCards | Ulcerative Colitis | GRK6     |
| GeneCards | Ulcerative Colitis | HDAC11   |
| GeneCards | Ulcerative Colitis | LZTR1    |
| GeneCards | Ulcerative Colitis | MAPKAPK5 |
| GeneCards | Ulcerative Colitis | NPEPPS   |
| GeneCards | Ulcerative Colitis | NRCAM    |
| GeneCards | Ulcerative Colitis | PLXNB1   |
| GeneCards | Ulcerative Colitis | PNPLA8   |
| GeneCards | Ulcerative Colitis | POLR2E   |
| GeneCards | Ulcerative Colitis | RBMX     |
| GeneCards | Ulcerative Colitis | SCNN1D   |
| GeneCards | Ulcerative Colitis | SEC24C   |
| GeneCards | Ulcerative Colitis | SENP1    |
| GeneCards | Ulcerative Colitis | SLC13A2  |
| GeneCards | Ulcerative Colitis | SLC26A4  |
| GeneCards | Ulcerative Colitis | TNNT3    |
| GeneCards | Ulcerative Colitis | UQCRC1   |
| GeneCards | Ulcerative Colitis | VAMP1    |
| GeneCards | Ulcerative Colitis | ABI1     |
| GeneCards | Ulcerative Colitis | AFF4     |
| GeneCards | Ulcerative Colitis | ATP6V0A1 |
| GeneCards | Ulcerative Colitis | ATP6V1G3 |
| GeneCards | Ulcerative Colitis | ATXN2    |
| GeneCards | Ulcerative Colitis | AUH      |
| GeneCards | Ulcerative Colitis | BRAP     |
| GeneCards | Ulcerative Colitis | CCS      |
| GeneCards | Ulcerative Colitis | FCER1G   |
| GeneCards | Ulcerative Colitis | HIBCH    |
| GeneCards | Ulcerative Colitis | LHX3     |
| GeneCards | Ulcerative Colitis | MEIS1    |
| GeneCards | Ulcerative Colitis | NEUROD2  |
| GeneCards | Ulcerative Colitis | PASK     |
| GeneCards | Ulcerative Colitis | PPP1R1B  |
| GeneCards | Ulcerative Colitis | RNF216   |
| GeneCards | Ulcerative Colitis | SON      |
| GeneCards | Ulcerative Colitis | TCAP     |
| GeneCards | Ulcerative Colitis | AGPAT1   |
| GeneCards | Ulcerative Colitis | APOM     |
| GeneCards | Ulcerative Colitis | BATF     |
| GeneCards | Ulcerative Colitis | C4BPB    |

|           |                    |          |
|-----------|--------------------|----------|
| GeneCards | Ulcerative Colitis | CAMTA1   |
| GeneCards | Ulcerative Colitis | CAPN10   |
| GeneCards | Ulcerative Colitis | DSE      |
| GeneCards | Ulcerative Colitis | GLYAT    |
| GeneCards | Ulcerative Colitis | GRIN3B   |
| GeneCards | Ulcerative Colitis | HERC1    |
| GeneCards | Ulcerative Colitis | HHEX     |
| GeneCards | Ulcerative Colitis | HIBADH   |
| GeneCards | Ulcerative Colitis | HLA-F    |
| GeneCards | Ulcerative Colitis | HOXA10   |
| GeneCards | Ulcerative Colitis | HOXA11   |
| GeneCards | Ulcerative Colitis | KDEL2    |
| GeneCards | Ulcerative Colitis | KLC2     |
| GeneCards | Ulcerative Colitis | LRIG2    |
| GeneCards | Ulcerative Colitis | LRRC32   |
| GeneCards | Ulcerative Colitis | MED1     |
| GeneCards | Ulcerative Colitis | NDUFAF3  |
| GeneCards | Ulcerative Colitis | PEX13    |
| GeneCards | Ulcerative Colitis | PPA2     |
| GeneCards | Ulcerative Colitis | PRPF6    |
| GeneCards | Ulcerative Colitis | RAB1B    |
| GeneCards | Ulcerative Colitis | SART1    |
| GeneCards | Ulcerative Colitis | SF3B2    |
| GeneCards | Ulcerative Colitis | SLC2A13  |
| GeneCards | Ulcerative Colitis | TMED10   |
| GeneCards | Ulcerative Colitis | TOP3B    |
| GeneCards | Ulcerative Colitis | TRPM2    |
| GeneCards | Ulcerative Colitis | APOBEC3A |
| GeneCards | Ulcerative Colitis | ARIH2    |
| GeneCards | Ulcerative Colitis | ATP8B3   |
| GeneCards | Ulcerative Colitis | B3GALT6  |
| GeneCards | Ulcerative Colitis | CDK11B   |
| GeneCards | Ulcerative Colitis | CST6     |
| GeneCards | Ulcerative Colitis | DAP3     |
| GeneCards | Ulcerative Colitis | DAPK2    |
| GeneCards | Ulcerative Colitis | DBN1     |
| GeneCards | Ulcerative Colitis | FKRP     |
| GeneCards | Ulcerative Colitis | HIPK1    |
| GeneCards | Ulcerative Colitis | JDP2     |
| GeneCards | Ulcerative Colitis | KCNK10   |
| GeneCards | Ulcerative Colitis | KIF3A    |
| GeneCards | Ulcerative Colitis | OLIG2    |
| GeneCards | Ulcerative Colitis | PPIL2    |
| GeneCards | Ulcerative Colitis | RALGAPA1 |

|           |                    |          |
|-----------|--------------------|----------|
| GeneCards | Ulcerative Colitis | RPL24    |
| GeneCards | Ulcerative Colitis | SH3PXD2B |
| GeneCards | Ulcerative Colitis | SYMPK    |
| GeneCards | Ulcerative Colitis | UBE2J2   |
| GeneCards | Ulcerative Colitis | VAMP3    |
| GeneCards | Ulcerative Colitis | ACTR1A   |
| GeneCards | Ulcerative Colitis | ADGRL2   |
| GeneCards | Ulcerative Colitis | ARHGEF16 |
| GeneCards | Ulcerative Colitis | ASIC2    |
| GeneCards | Ulcerative Colitis | B4GALT5  |
| GeneCards | Ulcerative Colitis | BZW2     |
| GeneCards | Ulcerative Colitis | CELSR3   |
| GeneCards | Ulcerative Colitis | COG5     |
| GeneCards | Ulcerative Colitis | CPSF3    |
| GeneCards | Ulcerative Colitis | DAGLB    |
| GeneCards | Ulcerative Colitis | DIDO1    |
| GeneCards | Ulcerative Colitis | DNMBP    |
| GeneCards | Ulcerative Colitis | ERGIC1   |
| GeneCards | Ulcerative Colitis | GDI2     |
| GeneCards | Ulcerative Colitis | GPN1     |
| GeneCards | Ulcerative Colitis | GRHL3    |
| GeneCards | Ulcerative Colitis | HCN3     |
| GeneCards | Ulcerative Colitis | HIF3A    |
| GeneCards | Ulcerative Colitis | IFT172   |
| GeneCards | Ulcerative Colitis | ITGB1BP1 |
| GeneCards | Ulcerative Colitis | KCTD15   |
| GeneCards | Ulcerative Colitis | KIF3B    |
| GeneCards | Ulcerative Colitis | LIMD1    |
| GeneCards | Ulcerative Colitis | MAN2A2   |
| GeneCards | Ulcerative Colitis | NAB1     |
| GeneCards | Ulcerative Colitis | OLFML3   |
| GeneCards | Ulcerative Colitis | PAPOLG   |
| GeneCards | Ulcerative Colitis | PCOLCE   |
| GeneCards | Ulcerative Colitis | RBM4     |
| GeneCards | Ulcerative Colitis | RCE1     |
| GeneCards | Ulcerative Colitis | RPL37    |
| GeneCards | Ulcerative Colitis | SIX5     |
| GeneCards | Ulcerative Colitis | SNRPD2   |
| GeneCards | Ulcerative Colitis | SRRT     |
| GeneCards | Ulcerative Colitis | STARD3   |
| GeneCards | Ulcerative Colitis | STK19    |
| GeneCards | Ulcerative Colitis | TAX1BP1  |
| GeneCards | Ulcerative Colitis | TDRKH    |
| GeneCards | Ulcerative Colitis | THEM4    |

|           |                    |          |
|-----------|--------------------|----------|
| GeneCards | Ulcerative Colitis | THEMIS   |
| GeneCards | Ulcerative Colitis | TNS1     |
| GeneCards | Ulcerative Colitis | TOR1B    |
| GeneCards | Ulcerative Colitis | TRIM8    |
| GeneCards | Ulcerative Colitis | TUFT1    |
| GeneCards | Ulcerative Colitis | UBR4     |
| GeneCards | Ulcerative Colitis | USP3     |
| GeneCards | Ulcerative Colitis | USP37    |
| GeneCards | Ulcerative Colitis | WTAP     |
| GeneCards | Ulcerative Colitis | YY1AP1   |
| GeneCards | Ulcerative Colitis | ACYP1    |
| GeneCards | Ulcerative Colitis | ADO      |
| GeneCards | Ulcerative Colitis | APOL6    |
| GeneCards | Ulcerative Colitis | ASAP2    |
| GeneCards | Ulcerative Colitis | ATP6V0E1 |
| GeneCards | Ulcerative Colitis | BBS1     |
| GeneCards | Ulcerative Colitis | CBLL1    |
| GeneCards | Ulcerative Colitis | CD248    |
| GeneCards | Ulcerative Colitis | CDK11A   |
| GeneCards | Ulcerative Colitis | DAZAP1   |
| GeneCards | Ulcerative Colitis | ECD      |
| GeneCards | Ulcerative Colitis | ERRFI1   |
| GeneCards | Ulcerative Colitis | FAU      |
| GeneCards | Ulcerative Colitis | FBXL20   |
| GeneCards | Ulcerative Colitis | GJA10    |
| GeneCards | Ulcerative Colitis | GNPDA1   |
| GeneCards | Ulcerative Colitis | GPSM1    |
| GeneCards | Ulcerative Colitis | HBP1     |
| GeneCards | Ulcerative Colitis | LRRTM3   |
| GeneCards | Ulcerative Colitis | MPPE1    |
| GeneCards | Ulcerative Colitis | MRPL11   |
| GeneCards | Ulcerative Colitis | NDST2    |
| GeneCards | Ulcerative Colitis | OLIG1    |
| GeneCards | Ulcerative Colitis | PMF1     |
| GeneCards | Ulcerative Colitis | PSMG2    |
| GeneCards | Ulcerative Colitis | RAPGEF6  |
| GeneCards | Ulcerative Colitis | RBM14    |
| GeneCards | Ulcerative Colitis | RBM17    |
| GeneCards | Ulcerative Colitis | RBM7     |
| GeneCards | Ulcerative Colitis | RIN1     |
| GeneCards | Ulcerative Colitis | RSPH4A   |
| GeneCards | Ulcerative Colitis | SDF4     |
| GeneCards | Ulcerative Colitis | SEPHS2   |
| GeneCards | Ulcerative Colitis | SF3A1    |

|           |                    |          |
|-----------|--------------------|----------|
| GeneCards | Ulcerative Colitis | SLC16A10 |
| GeneCards | Ulcerative Colitis | SLC6A7   |
| GeneCards | Ulcerative Colitis | SNX27    |
| GeneCards | Ulcerative Colitis | TAS1R3   |
| GeneCards | Ulcerative Colitis | TIPIN    |
| GeneCards | Ulcerative Colitis | TM9SF2   |
| GeneCards | Ulcerative Colitis | TPD52L2  |
| GeneCards | Ulcerative Colitis | UCKL1    |
| GeneCards | Ulcerative Colitis | UQCR10   |
| GeneCards | Ulcerative Colitis | USP21    |
| GeneCards | Ulcerative Colitis | USP36    |
| GeneCards | Ulcerative Colitis | ZBTB40   |
| GeneCards | Ulcerative Colitis | ZNF384   |
| GeneCards | Ulcerative Colitis | ACAP3    |
| GeneCards | Ulcerative Colitis | ANKRD30A |
| GeneCards | Ulcerative Colitis | ATAD3B   |
| GeneCards | Ulcerative Colitis | AURKAIP1 |
| GeneCards | Ulcerative Colitis | BAG6     |
| GeneCards | Ulcerative Colitis | BCAP29   |
| GeneCards | Ulcerative Colitis | BOD1     |
| GeneCards | Ulcerative Colitis | CEP192   |
| GeneCards | Ulcerative Colitis | CH25H    |
| GeneCards | Ulcerative Colitis | DDX27    |
| GeneCards | Ulcerative Colitis | DNAH17   |
| GeneCards | Ulcerative Colitis | DNAJC9   |
| GeneCards | Ulcerative Colitis | DOK6     |
| GeneCards | Ulcerative Colitis | DPH5     |
| GeneCards | Ulcerative Colitis | DRAP1    |
| GeneCards | Ulcerative Colitis | DUSP12   |
| GeneCards | Ulcerative Colitis | EAPP     |
| GeneCards | Ulcerative Colitis | EMC1     |
| GeneCards | Ulcerative Colitis | FAM177A1 |
| GeneCards | Ulcerative Colitis | FITM2    |
| GeneCards | Ulcerative Colitis | GPR107   |
| GeneCards | Ulcerative Colitis | GPR25    |
| GeneCards | Ulcerative Colitis | ING4     |
| GeneCards | Ulcerative Colitis | LYRM7    |
| GeneCards | Ulcerative Colitis | MED24    |
| GeneCards | Ulcerative Colitis | MRPL23   |
| GeneCards | Ulcerative Colitis | MRPS27   |
| GeneCards | Ulcerative Colitis | MYOZ1    |
| GeneCards | Ulcerative Colitis | P4HTM    |
| GeneCards | Ulcerative Colitis | PGS1     |
| GeneCards | Ulcerative Colitis | PKIG     |

|           |                    |          |
|-----------|--------------------|----------|
| GeneCards | Ulcerative Colitis | PLB1     |
| GeneCards | Ulcerative Colitis | PRELID1  |
| GeneCards | Ulcerative Colitis | PWP2     |
| GeneCards | Ulcerative Colitis | QSOX2    |
| GeneCards | Ulcerative Colitis | RAB24    |
| GeneCards | Ulcerative Colitis | REXO2    |
| GeneCards | Ulcerative Colitis | RLN2     |
| GeneCards | Ulcerative Colitis | RNF126   |
| GeneCards | Ulcerative Colitis | RPS27L   |
| GeneCards | Ulcerative Colitis | RSPH3    |
| GeneCards | Ulcerative Colitis | SENP7    |
| GeneCards | Ulcerative Colitis | SHISA5   |
| GeneCards | Ulcerative Colitis | SLC12A9  |
| GeneCards | Ulcerative Colitis | SNX13    |
| GeneCards | Ulcerative Colitis | SPAG16   |
| GeneCards | Ulcerative Colitis | STAC2    |
| GeneCards | Ulcerative Colitis | TRAPPC10 |
| GeneCards | Ulcerative Colitis | YTHDF1   |
| GeneCards | Ulcerative Colitis | ASCC2    |
| GeneCards | Ulcerative Colitis | BNIP1    |
| GeneCards | Ulcerative Colitis | CCNL2    |
| GeneCards | Ulcerative Colitis | CEP76    |
| GeneCards | Ulcerative Colitis | COMMD7   |
| GeneCards | Ulcerative Colitis | DNAJC27  |
| GeneCards | Ulcerative Colitis | DUSP8    |
| GeneCards | Ulcerative Colitis | IRF2BP1  |
| GeneCards | Ulcerative Colitis | LY6G6F   |
| GeneCards | Ulcerative Colitis | MYRF     |
| GeneCards | Ulcerative Colitis | NAALADL1 |
| GeneCards | Ulcerative Colitis | RNPEPL1  |
| GeneCards | Ulcerative Colitis | RTF1     |
| GeneCards | Ulcerative Colitis | SDF2L1   |
| GeneCards | Ulcerative Colitis | SERBP1   |
| GeneCards | Ulcerative Colitis | SGIP1    |
| GeneCards | Ulcerative Colitis | TATDN1   |
| GeneCards | Ulcerative Colitis | TSPAN13  |
| GeneCards | Ulcerative Colitis | TSPAN32  |
| GeneCards | Ulcerative Colitis | UBAC1    |
| GeneCards | Ulcerative Colitis | VARA1    |
| GeneCards | Ulcerative Colitis | WIPF2    |
| GeneCards | Ulcerative Colitis | ZC3H12C  |
| GeneCards | Ulcerative Colitis | ZNF3     |
| GeneCards | Ulcerative Colitis | ABHD16A  |
| GeneCards | Ulcerative Colitis | AMZ1     |

|           |                    |          |
|-----------|--------------------|----------|
| GeneCards | Ulcerative Colitis | ASB6     |
| GeneCards | Ulcerative Colitis | ASB8     |
| GeneCards | Ulcerative Colitis | BBS12    |
| GeneCards | Ulcerative Colitis | CARS1    |
| GeneCards | Ulcerative Colitis | CASC3    |
| GeneCards | Ulcerative Colitis | CDC42SE2 |
| GeneCards | Ulcerative Colitis | CELF3    |
| GeneCards | Ulcerative Colitis | CENPO    |
| GeneCards | Ulcerative Colitis | CEP89    |
| GeneCards | Ulcerative Colitis | DALRD3   |
| GeneCards | Ulcerative Colitis | DYDC1    |
| GeneCards | Ulcerative Colitis | ENGASE   |
| GeneCards | Ulcerative Colitis | FBXO24   |
| GeneCards | Ulcerative Colitis | FCAMR    |
| GeneCards | Ulcerative Colitis | FNDC3A   |
| GeneCards | Ulcerative Colitis | GIGYF1   |
| GeneCards | Ulcerative Colitis | GMEB2    |
| GeneCards | Ulcerative Colitis | IFNLR1   |
| GeneCards | Ulcerative Colitis | LPCAT3   |
| GeneCards | Ulcerative Colitis | LRCH4    |
| GeneCards | Ulcerative Colitis | LSM14A   |
| GeneCards | Ulcerative Colitis | LY6G6C   |
| GeneCards | Ulcerative Colitis | MRPL20   |
| GeneCards | Ulcerative Colitis | MRPL9    |
| GeneCards | Ulcerative Colitis | MXRA8    |
| GeneCards | Ulcerative Colitis | NGRN     |
| GeneCards | Ulcerative Colitis | OIP5     |
| GeneCards | Ulcerative Colitis | OLFML2B  |
| GeneCards | Ulcerative Colitis | PILRB    |
| GeneCards | Ulcerative Colitis | PNRC2    |
| GeneCards | Ulcerative Colitis | PPP1R11  |
| GeneCards | Ulcerative Colitis | PPP1R18  |
| GeneCards | Ulcerative Colitis | QRICH1   |
| GeneCards | Ulcerative Colitis | RBM4B    |
| GeneCards | Ulcerative Colitis | RNF123   |
| GeneCards | Ulcerative Colitis | RNF145   |
| GeneCards | Ulcerative Colitis | RPL26L1  |
| GeneCards | Ulcerative Colitis | SBK1     |
| GeneCards | Ulcerative Colitis | SLC9A4   |
| GeneCards | Ulcerative Colitis | SPSB2    |
| GeneCards | Ulcerative Colitis | TAPBPL   |
| GeneCards | Ulcerative Colitis | TBC1D8   |
| GeneCards | Ulcerative Colitis | TCHHL1   |
| GeneCards | Ulcerative Colitis | THEM5    |



|           |                    |          |
|-----------|--------------------|----------|
| GeneCards | Ulcerative Colitis | TNRC6C   |
| GeneCards | Ulcerative Colitis | TRIM10   |
| GeneCards | Ulcerative Colitis | TRIM40   |
| GeneCards | Ulcerative Colitis | UBLCP1   |
| GeneCards | Ulcerative Colitis | WDR43    |
| GeneCards | Ulcerative Colitis | ZFPL1    |
| GeneCards | Ulcerative Colitis | ZNF142   |
| GeneCards | Ulcerative Colitis | ZNF366   |
| GeneCards | Ulcerative Colitis | ZNF507   |
| GeneCards | Ulcerative Colitis | ZWILCH   |
| GeneCards | Ulcerative Colitis | ACRBP    |
| GeneCards | Ulcerative Colitis | C11orf68 |
| GeneCards | Ulcerative Colitis | C9orf78  |
| GeneCards | Ulcerative Colitis | CMC1     |
| GeneCards | Ulcerative Colitis | DYDC2    |
| GeneCards | Ulcerative Colitis | EHBP1L1  |
| GeneCards | Ulcerative Colitis | ENDOU    |
| GeneCards | Ulcerative Colitis | EVX1     |
| GeneCards | Ulcerative Colitis | EXD1     |
| GeneCards | Ulcerative Colitis | FAM118A  |
| GeneCards | Ulcerative Colitis | FAM53B   |
| GeneCards | Ulcerative Colitis | FAXDC2   |
| GeneCards | Ulcerative Colitis | FUT11    |
| GeneCards | Ulcerative Colitis | FYB1     |
| GeneCards | Ulcerative Colitis | GAL3ST2  |
| GeneCards | Ulcerative Colitis | GID8     |
| GeneCards | Ulcerative Colitis | GRAMD1B  |
| GeneCards | Ulcerative Colitis | KANSL2   |
| GeneCards | Ulcerative Colitis | LIX1     |
| GeneCards | Ulcerative Colitis | MED16    |
| GeneCards | Ulcerative Colitis | MFSD9    |
| GeneCards | Ulcerative Colitis | MIEN1    |
| GeneCards | Ulcerative Colitis | MIER1    |
| GeneCards | Ulcerative Colitis | MSL1     |
| GeneCards | Ulcerative Colitis | NACC2    |
| GeneCards | Ulcerative Colitis | NPAS4    |
| GeneCards | Ulcerative Colitis | NUDT13   |
| GeneCards | Ulcerative Colitis | OR2H2    |
| GeneCards | Ulcerative Colitis | PLEKHG6  |
| GeneCards | Ulcerative Colitis | PRM2     |
| GeneCards | Ulcerative Colitis | PTCD2    |
| GeneCards | Ulcerative Colitis | QPCTL    |
| GeneCards | Ulcerative Colitis | RAVER1   |
| GeneCards | Ulcerative Colitis | RPAP3    |

|           |                    |           |
|-----------|--------------------|-----------|
| GeneCards | Ulcerative Colitis | SKOR1     |
| GeneCards | Ulcerative Colitis | SNN       |
| GeneCards | Ulcerative Colitis | SPATA2    |
| GeneCards | Ulcerative Colitis | TCTA      |
| GeneCards | Ulcerative Colitis | TMEM63B   |
| GeneCards | Ulcerative Colitis | TNP2      |
| GeneCards | Ulcerative Colitis | TRIM4     |
| GeneCards | Ulcerative Colitis | UBTD2     |
| GeneCards | Ulcerative Colitis | WHRN      |
| GeneCards | Ulcerative Colitis | YIF1A     |
| GeneCards | Ulcerative Colitis | ZC3H4     |
| GeneCards | Ulcerative Colitis | ZPLD1     |
| GeneCards | Ulcerative Colitis | BPIFB3    |
| GeneCards | Ulcerative Colitis | BPIFB4    |
| GeneCards | Ulcerative Colitis | C6orf15   |
| GeneCards | Ulcerative Colitis | CCDC61    |
| GeneCards | Ulcerative Colitis | CCDC82    |
| GeneCards | Ulcerative Colitis | CREBRF    |
| GeneCards | Ulcerative Colitis | CYTL1     |
| GeneCards | Ulcerative Colitis | DNAJC28   |
| GeneCards | Ulcerative Colitis | EIF1AD    |
| GeneCards | Ulcerative Colitis | FRMD8     |
| GeneCards | Ulcerative Colitis | GPATCH1   |
| GeneCards | Ulcerative Colitis | HEATR3    |
| GeneCards | Ulcerative Colitis | IFFO1     |
| GeneCards | Ulcerative Colitis | IQCH      |
| GeneCards | Ulcerative Colitis | LCA5L     |
| GeneCards | Ulcerative Colitis | LY6G6D    |
| GeneCards | Ulcerative Colitis | MACROH2A1 |
| GeneCards | Ulcerative Colitis | MIER2     |
| GeneCards | Ulcerative Colitis | MXD3      |
| GeneCards | Ulcerative Colitis | RIC8B     |
| GeneCards | Ulcerative Colitis | RPP25L    |
| GeneCards | Ulcerative Colitis | RSBN1     |
| GeneCards | Ulcerative Colitis | SH2D4B    |
| GeneCards | Ulcerative Colitis | STK32B    |
| GeneCards | Ulcerative Colitis | THAP7     |
| GeneCards | Ulcerative Colitis | TMCO4     |
| GeneCards | Ulcerative Colitis | TMEM106C  |
| GeneCards | Ulcerative Colitis | TNRC18    |
| GeneCards | Ulcerative Colitis | TRIM15    |
| GeneCards | Ulcerative Colitis | TSSC4     |
| GeneCards | Ulcerative Colitis | TTC33     |
| GeneCards | Ulcerative Colitis | TTPAL     |

|           |                    |          |
|-----------|--------------------|----------|
| GeneCards | Ulcerative Colitis | UQCC1    |
| GeneCards | Ulcerative Colitis | ZCCHC10  |
| GeneCards | Ulcerative Colitis | AP5B1    |
| GeneCards | Ulcerative Colitis | CCDC51   |
| GeneCards | Ulcerative Colitis | CFAP70   |
| GeneCards | Ulcerative Colitis | EMSY     |
| GeneCards | Ulcerative Colitis | HECTD4   |
| GeneCards | Ulcerative Colitis | LINGO4   |
| GeneCards | Ulcerative Colitis | LYZL2    |
| GeneCards | Ulcerative Colitis | OR10AD1  |
| GeneCards | Ulcerative Colitis | RADIL    |
| GeneCards | Ulcerative Colitis | SLC45A1  |
| GeneCards | Ulcerative Colitis | SUPT7L   |
| GeneCards | Ulcerative Colitis | TMEM174  |
| GeneCards | Ulcerative Colitis | VWA7     |
| GeneCards | Ulcerative Colitis | ZMAT5    |
| GeneCards | Ulcerative Colitis | ZNF512   |
| GeneCards | Ulcerative Colitis | ANKMY2   |
| GeneCards | Ulcerative Colitis | BPIFA2   |
| GeneCards | Ulcerative Colitis | C5orf24  |
| GeneCards | Ulcerative Colitis | CATIP    |
| GeneCards | Ulcerative Colitis | CNEP1R1  |
| GeneCards | Ulcerative Colitis | CNOT11   |
| GeneCards | Ulcerative Colitis | DUSP28   |
| GeneCards | Ulcerative Colitis | GRID2IP  |
| GeneCards | Ulcerative Colitis | LURAP1L  |
| GeneCards | Ulcerative Colitis | MPIG6B   |
| GeneCards | Ulcerative Colitis | MUSTN1   |
| GeneCards | Ulcerative Colitis | PCP4L1   |
| GeneCards | Ulcerative Colitis | PPP1R35  |
| GeneCards | Ulcerative Colitis | PTRHD1   |
| GeneCards | Ulcerative Colitis | TMEM259  |
| GeneCards | Ulcerative Colitis | ANKRD33B |
| GeneCards | Ulcerative Colitis | AQP12A   |
| GeneCards | Ulcerative Colitis | BPIFA3   |
| GeneCards | Ulcerative Colitis | C3orf62  |
| GeneCards | Ulcerative Colitis | CNOT9    |
| GeneCards | Ulcerative Colitis | DEXI     |
| GeneCards | Ulcerative Colitis | GPATCH2L |
| GeneCards | Ulcerative Colitis | IFFO2    |
| GeneCards | Ulcerative Colitis | PFN3     |
| GeneCards | Ulcerative Colitis | PLEKHN1  |
| GeneCards | Ulcerative Colitis | PRM3     |
| GeneCards | Ulcerative Colitis | SAP25    |

|           |                    |           |
|-----------|--------------------|-----------|
| GeneCards | Ulcerative Colitis | SEPTIN8   |
| GeneCards | Ulcerative Colitis | TDRD10    |
| GeneCards | Ulcerative Colitis | TMEM89    |
| GeneCards | Ulcerative Colitis | TSGA10IP  |
| GeneCards | Ulcerative Colitis | ABRAXAS2  |
| GeneCards | Ulcerative Colitis | AQP12B    |
| GeneCards | Ulcerative Colitis | C11orf87  |
| GeneCards | Ulcerative Colitis | CCDC71    |
| GeneCards | Ulcerative Colitis | CPTP      |
| GeneCards | Ulcerative Colitis | DNLZ      |
| GeneCards | Ulcerative Colitis | MFSD4B    |
| GeneCards | Ulcerative Colitis | NSG2      |
| GeneCards | Ulcerative Colitis | OR5B12    |
| GeneCards | Ulcerative Colitis | RASL11A   |
| GeneCards | Ulcerative Colitis | SEPTIN1   |
| GeneCards | Ulcerative Colitis | ZNF774    |
| GeneCards | Ulcerative Colitis | C17orf67  |
| GeneCards | Ulcerative Colitis | EIPR1     |
| GeneCards | Ulcerative Colitis | MUCL3     |
| GeneCards | Ulcerative Colitis | OR5B21    |
| GeneCards | Ulcerative Colitis | ANKRD61   |
| GeneCards | Ulcerative Colitis | BICRA     |
| GeneCards | Ulcerative Colitis | C11orf21  |
| GeneCards | Ulcerative Colitis | CBARP     |
| GeneCards | Ulcerative Colitis | CCDC184   |
| GeneCards | Ulcerative Colitis | CDHR4     |
| GeneCards | Ulcerative Colitis | CFAP126   |
| GeneCards | Ulcerative Colitis | FAM205A   |
| GeneCards | Ulcerative Colitis | KRTAP5-5  |
| GeneCards | Ulcerative Colitis | LCE3A     |
| GeneCards | Ulcerative Colitis | LY6G5C    |
| GeneCards | Ulcerative Colitis | LYRM9     |
| GeneCards | Ulcerative Colitis | PRXL2A    |
| GeneCards | Ulcerative Colitis | RIMBP3C   |
| GeneCards | Ulcerative Colitis | TMA7      |
| GeneCards | Ulcerative Colitis | TMEM116   |
| GeneCards | Ulcerative Colitis | TTLL8     |
| GeneCards | Ulcerative Colitis | ZUP1      |
| GeneCards | Ulcerative Colitis | C5orf47   |
| GeneCards | Ulcerative Colitis | DUSP29    |
| GeneCards | Ulcerative Colitis | DYNLT5    |
| GeneCards | Ulcerative Colitis | EEF1AKMT2 |
| GeneCards | Ulcerative Colitis | IGF2-AS   |
| GeneCards | Ulcerative Colitis | KRTAP5-6  |

|           |                    |                 |
|-----------|--------------------|-----------------|
| GeneCards | Ulcerative Colitis | LCE3B           |
| GeneCards | Ulcerative Colitis | OR5B2           |
| GeneCards | Ulcerative Colitis | PCNX3           |
| GeneCards | Ulcerative Colitis | PHF24           |
| GeneCards | Ulcerative Colitis | TRAPPC3L        |
| GeneCards | Ulcerative Colitis | ARIH2OS         |
| GeneCards | Ulcerative Colitis | C1QTNF12        |
| GeneCards | Ulcerative Colitis | C9orf163        |
| GeneCards | Ulcerative Colitis | INAFM1          |
| GeneCards | Ulcerative Colitis | LY6G6E          |
| GeneCards | Ulcerative Colitis | MFSD13A         |
| GeneCards | Ulcerative Colitis | TSBP1           |
| GeneCards | Ulcerative Colitis | DNAI4           |
| GeneCards | Ulcerative Colitis | STIMATE         |
| GeneCards | Ulcerative Colitis | TNXA            |
| GeneCards | Ulcerative Colitis | C20orf203       |
| GeneCards | Ulcerative Colitis | LINC02694       |
| GeneCards | Ulcerative Colitis | PI4KAP2         |
| GeneCards | Ulcerative Colitis | TMEM250         |
| GeneCards | Ulcerative Colitis | CFAP141         |
| GeneCards | Ulcerative Colitis | SCARNA12        |
| GeneCards | Ulcerative Colitis | CALHM4          |
| GeneCards | Ulcerative Colitis | GABARAPL3       |
| GeneCards | Ulcerative Colitis | MEIKIN          |
| GeneCards | Ulcerative Colitis | C3orf84         |
| GeneCards | Ulcerative Colitis | ATP6V1G2-DDX39B |
| GeneCards | Ulcerative Colitis | LINC00511       |
| GeneCards | Ulcerative Colitis | NPIPB6          |
| GeneCards | Ulcerative Colitis | SCARNA10        |
| GeneCards | Ulcerative Colitis | FLG-AS1         |
| GeneCards | Ulcerative Colitis | GVQW3           |
| GeneCards | Ulcerative Colitis | HCG4            |
| GeneCards | Ulcerative Colitis | MIR1301         |
| GeneCards | Ulcerative Colitis | MSH5-SAPCD1     |
| GeneCards | Ulcerative Colitis | PRR33           |
| GeneCards | Ulcerative Colitis | SCARNA11        |
| GeneCards | Ulcerative Colitis | SNORA21         |
| GeneCards | Ulcerative Colitis | TEX41           |
| GeneCards | Ulcerative Colitis | ACTA2-AS1       |
| GeneCards | Ulcerative Colitis | ADAM1A          |
| GeneCards | Ulcerative Colitis | BMS1P20         |
| GeneCards | Ulcerative Colitis | JAZF1-AS1       |
| GeneCards | Ulcerative Colitis | LINC01082       |
| GeneCards | Ulcerative Colitis | MIR1260B        |

|           |                    |                |
|-----------|--------------------|----------------|
| GeneCards | Ulcerative Colitis | MIR3909        |
| GeneCards | Ulcerative Colitis | SNORD124       |
| GeneCards | Ulcerative Colitis | SNORD16        |
| GeneCards | Ulcerative Colitis | STIMATE-MUSTN1 |
| GeneCards | Ulcerative Colitis | ZFP91-CNTF     |
| GeneCards | Ulcerative Colitis | C1RL-AS1       |
| GeneCards | Ulcerative Colitis | CATIP-AS1      |
| GeneCards | Ulcerative Colitis | FAM99B         |
| GeneCards | Ulcerative Colitis | LINC00484      |
| GeneCards | Ulcerative Colitis | LINC01620      |
| GeneCards | Ulcerative Colitis | MIR554         |
| GeneCards | Ulcerative Colitis | MIR647         |
| GeneCards | Ulcerative Colitis | PPT2-EGFL8     |
| GeneCards | Ulcerative Colitis | SLC26A4-AS1    |
| GeneCards | Ulcerative Colitis | TET2-AS1       |
| GeneCards | Ulcerative Colitis | THAP7-AS1      |
| GeneCards | Ulcerative Colitis | C20orf181      |
| GeneCards | Ulcerative Colitis | HCG17          |
| GeneCards | Ulcerative Colitis | HDAC11-AS1     |
| GeneCards | Ulcerative Colitis | JMJD1C-AS1     |
| GeneCards | Ulcerative Colitis | LINC00993      |
| GeneCards | Ulcerative Colitis | LURAP1L-AS1    |
| GeneCards | Ulcerative Colitis | MIR1208        |
| GeneCards | Ulcerative Colitis | SATB1-AS1      |
| GeneCards | Ulcerative Colitis | SEMA3B-AS1     |
| GeneCards | Ulcerative Colitis | TEX48          |
| GeneCards | Ulcerative Colitis | ZSWIM8-AS1     |
| GeneCards | Ulcerative Colitis | ARHGEF38-IT1   |
| GeneCards | Ulcerative Colitis | CRTC3-AS1      |
| GeneCards | Ulcerative Colitis | FAM205BP       |
| GeneCards | Ulcerative Colitis | HCG21          |
| GeneCards | Ulcerative Colitis | HORMAD2-AS1    |
| GeneCards | Ulcerative Colitis | IFITM4P        |
| GeneCards | Ulcerative Colitis | IGLV5-52       |
| GeneCards | Ulcerative Colitis | LINC00548      |
| GeneCards | Ulcerative Colitis | LINC00824      |
| GeneCards | Ulcerative Colitis | LINC01220      |
| GeneCards | Ulcerative Colitis | LINC01250      |
| GeneCards | Ulcerative Colitis | LINC01430      |
| GeneCards | Ulcerative Colitis | LINC01512      |
| GeneCards | Ulcerative Colitis | LNC-LBCS       |
| GeneCards | Ulcerative Colitis | LOC100288123   |
| GeneCards | Ulcerative Colitis | MIR4425        |
| GeneCards | Ulcerative Colitis | MIR4686        |

|           |                    |                 |
|-----------|--------------------|-----------------|
| GeneCards | Ulcerative Colitis | MIR623          |
| GeneCards | Ulcerative Colitis | MMP24OS         |
| GeneCards | Ulcerative Colitis | NRAD1           |
| GeneCards | Ulcerative Colitis | OVOL1-AS1       |
| GeneCards | Ulcerative Colitis | RBFADN          |
| GeneCards | Ulcerative Colitis | REL-DT          |
| GeneCards | Ulcerative Colitis | SUGT1P3         |
| GeneCards | Ulcerative Colitis | TNFRSF14-AS1    |
| GeneCards | Ulcerative Colitis | ZBTB46-AS1      |
| GeneCards | Ulcerative Colitis | C2CD4D-AS1      |
| GeneCards | Ulcerative Colitis | DDR1-DT         |
| GeneCards | Ulcerative Colitis | DKFZP434A062    |
| GeneCards | Ulcerative Colitis | DM1-AS          |
| GeneCards | Ulcerative Colitis | ENSG00000244255 |
| GeneCards | Ulcerative Colitis | ETS1-AS1        |
| GeneCards | Ulcerative Colitis | IL6R-AS1        |
| GeneCards | Ulcerative Colitis | IL6ST-DT        |
| GeneCards | Ulcerative Colitis | LINC00581       |
| GeneCards | Ulcerative Colitis | LINC00892       |
| GeneCards | Ulcerative Colitis | LINC01934       |
| GeneCards | Ulcerative Colitis | LINC02098       |
| GeneCards | Ulcerative Colitis | LINC02202       |
| GeneCards | Ulcerative Colitis | LINC02570       |
| GeneCards | Ulcerative Colitis | LINC02800       |
| GeneCards | Ulcerative Colitis | PDCL3P4         |
| GeneCards | Ulcerative Colitis | RPL26L1-AS1     |
| GeneCards | Ulcerative Colitis | SLC12A9-AS1     |
| GeneCards | Ulcerative Colitis | SMG1P5          |
| GeneCards | Ulcerative Colitis | SNORA58B        |
| GeneCards | Ulcerative Colitis | UBE2Q1-AS1      |
| GeneCards | Ulcerative Colitis | BSN-DT          |
| GeneCards | Ulcerative Colitis | ETF1P1          |
| GeneCards | Ulcerative Colitis | FAM238C         |
| GeneCards | Ulcerative Colitis | LINC01700       |
| GeneCards | Ulcerative Colitis | LINC01882       |
| GeneCards | Ulcerative Colitis | LINC01989       |
| GeneCards | Ulcerative Colitis | LINC02421       |
| GeneCards | Ulcerative Colitis | LINC02937       |
| GeneCards | Ulcerative Colitis | LINC02995       |
| GeneCards | Ulcerative Colitis | LINC03004       |
| GeneCards | Ulcerative Colitis | MIR6090         |
| GeneCards | Ulcerative Colitis | RPL7P32         |
| GeneCards | Ulcerative Colitis | TAGAP-AS1       |
| GeneCards | Ulcerative Colitis | TDRKH-AS1       |

|           |                    |                 |
|-----------|--------------------|-----------------|
| GeneCards | Ulcerative Colitis | ZBTB11-AS1      |
| GeneCards | Ulcerative Colitis | ZNRD2-DT        |
| GeneCards | Ulcerative Colitis | ABHD17AP4       |
| GeneCards | Ulcerative Colitis | ANKRD33B-AS1    |
| GeneCards | Ulcerative Colitis | CBLL1-AS1       |
| GeneCards | Ulcerative Colitis | CCND3P1         |
| GeneCards | Ulcerative Colitis | CDC37P1         |
| GeneCards | Ulcerative Colitis | CYLD-AS1        |
| GeneCards | Ulcerative Colitis | ENSG00000228778 |
| GeneCards | Ulcerative Colitis | ENSG00000229694 |
| GeneCards | Ulcerative Colitis | ENSG00000245156 |
| GeneCards | Ulcerative Colitis | ENSG00000249624 |
| GeneCards | Ulcerative Colitis | ENSG00000253508 |
| GeneCards | Ulcerative Colitis | ENSG00000263020 |
| GeneCards | Ulcerative Colitis | ERRFI1-DT       |
| GeneCards | Ulcerative Colitis | IL1R1-AS1       |
| GeneCards | Ulcerative Colitis | IRS3P           |
| GeneCards | Ulcerative Colitis | LINC00604       |
| GeneCards | Ulcerative Colitis | LINC01147       |
| GeneCards | Ulcerative Colitis | LINC01953       |
| GeneCards | Ulcerative Colitis | LINC02213       |
| GeneCards | Ulcerative Colitis | LINC02537       |
| GeneCards | Ulcerative Colitis | LINC02555       |
| GeneCards | Ulcerative Colitis | LINC02708       |
| GeneCards | Ulcerative Colitis | LINC02757       |
| GeneCards | Ulcerative Colitis | LINC02888       |
| GeneCards | Ulcerative Colitis | LINC02889       |
| GeneCards | Ulcerative Colitis | MHENCN          |
| GeneCards | Ulcerative Colitis | MICB-DT         |
| GeneCards | Ulcerative Colitis | MIR6771         |
| GeneCards | Ulcerative Colitis | PCNPP1          |
| GeneCards | Ulcerative Colitis | PPIAP9          |
| GeneCards | Ulcerative Colitis | R3HDML-AS1      |
| GeneCards | Ulcerative Colitis | RFX5-AS1        |
| GeneCards | Ulcerative Colitis | RPS10P6         |
| GeneCards | Ulcerative Colitis | SCYGR8          |
| GeneCards | Ulcerative Colitis | STAG3L5P        |
| GeneCards | Ulcerative Colitis | TSPAN14-AS1     |
| GeneCards | Ulcerative Colitis | ALDH7A1P4       |
| GeneCards | Ulcerative Colitis | EBAG9P1         |
| GeneCards | Ulcerative Colitis | EIF2S2P3        |
| GeneCards | Ulcerative Colitis | EMSY-DT         |
| GeneCards | Ulcerative Colitis | ENSG00000199473 |
| GeneCards | Ulcerative Colitis | ENSG00000199550 |



|           |                    |                 |
|-----------|--------------------|-----------------|
| GeneCards | Ulcerative Colitis | ENSG00000204929 |
| GeneCards | Ulcerative Colitis | ENSG00000205414 |
| GeneCards | Ulcerative Colitis | ENSG00000224228 |
| GeneCards | Ulcerative Colitis | ENSG00000225172 |
| GeneCards | Ulcerative Colitis | ENSG00000225421 |
| GeneCards | Ulcerative Colitis | ENSG00000227938 |
| GeneCards | Ulcerative Colitis | ENSG00000228863 |
| GeneCards | Ulcerative Colitis | ENSG00000229990 |
| GeneCards | Ulcerative Colitis | ENSG00000230534 |
| GeneCards | Ulcerative Colitis | ENSG00000230537 |
| GeneCards | Ulcerative Colitis | ENSG00000231355 |
| GeneCards | Ulcerative Colitis | ENSG00000234132 |
| GeneCards | Ulcerative Colitis | ENSG00000234255 |
| GeneCards | Ulcerative Colitis | ENSG00000234261 |
| GeneCards | Ulcerative Colitis | ENSG00000234630 |
| GeneCards | Ulcerative Colitis | ENSG00000235888 |
| GeneCards | Ulcerative Colitis | ENSG00000236304 |
| GeneCards | Ulcerative Colitis | ENSG00000247121 |
| GeneCards | Ulcerative Colitis | ENSG00000248373 |
| GeneCards | Ulcerative Colitis | ENSG00000250264 |
| GeneCards | Ulcerative Colitis | ENSG00000254295 |
| GeneCards | Ulcerative Colitis | ENSG00000254461 |
| GeneCards | Ulcerative Colitis | ENSG00000255038 |
| GeneCards | Ulcerative Colitis | ENSG00000255320 |
| GeneCards | Ulcerative Colitis | ENSG00000256433 |
| GeneCards | Ulcerative Colitis | ENSG00000256967 |
| GeneCards | Ulcerative Colitis | ENSG00000258559 |
| GeneCards | Ulcerative Colitis | ENSG00000258740 |
| GeneCards | Ulcerative Colitis | ENSG00000261338 |
| GeneCards | Ulcerative Colitis | ENSG00000261367 |
| GeneCards | Ulcerative Colitis | ENSG00000262151 |
| GeneCards | Ulcerative Colitis | ENSG00000266469 |
| GeneCards | Ulcerative Colitis | ENSG00000267199 |
| GeneCards | Ulcerative Colitis | ENSG00000267480 |
| GeneCards | Ulcerative Colitis | ENSG00000270124 |
| GeneCards | Ulcerative Colitis | ENSG00000270210 |
| GeneCards | Ulcerative Colitis | ENSG00000270640 |
| GeneCards | Ulcerative Colitis | ENSG00000272305 |
| GeneCards | Ulcerative Colitis | ENSG00000281920 |
| GeneCards | Ulcerative Colitis | GAPDH-DT        |
| GeneCards | Ulcerative Colitis | HCG9P5          |
| GeneCards | Ulcerative Colitis | HNRNPCP4        |
| GeneCards | Ulcerative Colitis | KLC2-AS1        |
| GeneCards | Ulcerative Colitis | KPNB1-DT        |

|           |                    |                 |
|-----------|--------------------|-----------------|
| GeneCards | Ulcerative Colitis | KRT18P39        |
| GeneCards | Ulcerative Colitis | LINC02230       |
| GeneCards | Ulcerative Colitis | LINC02380       |
| GeneCards | Ulcerative Colitis | LINC02625       |
| GeneCards | Ulcerative Colitis | LINC02723       |
| GeneCards | Ulcerative Colitis | LINC02863       |
| GeneCards | Ulcerative Colitis | LINC02920       |
| GeneCards | Ulcerative Colitis | LOC101928372    |
| GeneCards | Ulcerative Colitis | LOC105371083    |
| GeneCards | Ulcerative Colitis | LOC112267968    |
| GeneCards | Ulcerative Colitis | LOC119746555    |
| GeneCards | Ulcerative Colitis | LOC124900380    |
| GeneCards | Ulcerative Colitis | LOC124900437    |
| GeneCards | Ulcerative Colitis | LOC124903590    |
| GeneCards | Ulcerative Colitis | RNA5SP192       |
| GeneCards | Ulcerative Colitis | RNU1-134P       |
| GeneCards | Ulcerative Colitis | RNU6-344P       |
| GeneCards | Ulcerative Colitis | RNU6-474P       |
| GeneCards | Ulcerative Colitis | RNU6-543P       |
| GeneCards | Ulcerative Colitis | RNU6-793P       |
| GeneCards | Ulcerative Colitis | RNU6-919P       |
| GeneCards | Ulcerative Colitis | RNU6-925P       |
| GeneCards | Ulcerative Colitis | RNU7-57P        |
| GeneCards | Ulcerative Colitis | RNY4P10         |
| GeneCards | Ulcerative Colitis | RPS19P3         |
| GeneCards | Ulcerative Colitis | RPS5P3          |
| GeneCards | Ulcerative Colitis | SNRPGP7         |
| GeneCards | Ulcerative Colitis | SRP14P1         |
| GeneCards | Ulcerative Colitis | SUMO2P1         |
| GeneCards | Ulcerative Colitis | TNRC6C-AS1      |
| GeneCards | Ulcerative Colitis | TRL-CAG1-6      |
| GeneCards | Ulcerative Colitis | ZBTB46-AS2      |
| GeneCards | Ulcerative Colitis | BTF3P2          |
| GeneCards | Ulcerative Colitis | CBX3P9          |
| GeneCards | Ulcerative Colitis | CCR12P          |
| GeneCards | Ulcerative Colitis | CCT5P2          |
| GeneCards | Ulcerative Colitis | CICP4           |
| GeneCards | Ulcerative Colitis | CYCSP42         |
| GeneCards | Ulcerative Colitis | ENSG00000184441 |
| GeneCards | Ulcerative Colitis | ENSG00000199332 |
| GeneCards | Ulcerative Colitis | ENSG00000202533 |
| GeneCards | Ulcerative Colitis | ENSG00000205537 |
| GeneCards | Ulcerative Colitis | ENSG00000219410 |
| GeneCards | Ulcerative Colitis | ENSG00000224000 |

|           |                    |                 |
|-----------|--------------------|-----------------|
| GeneCards | Ulcerative Colitis | ENSG00000224478 |
| GeneCards | Ulcerative Colitis | ENSG00000224645 |
| GeneCards | Ulcerative Colitis | ENSG00000230684 |
| GeneCards | Ulcerative Colitis | ENSG00000232937 |
| GeneCards | Ulcerative Colitis | ENSG00000234117 |
| GeneCards | Ulcerative Colitis | ENSG00000236308 |
| GeneCards | Ulcerative Colitis | ENSG00000237773 |
| GeneCards | Ulcerative Colitis | ENSG00000238280 |
| GeneCards | Ulcerative Colitis | ENSG00000242798 |
| GeneCards | Ulcerative Colitis | ENSG00000243696 |
| GeneCards | Ulcerative Colitis | ENSG00000248734 |
| GeneCards | Ulcerative Colitis | ENSG00000248753 |
| GeneCards | Ulcerative Colitis | ENSG00000253111 |
| GeneCards | Ulcerative Colitis | ENSG00000253445 |
| GeneCards | Ulcerative Colitis | ENSG00000254810 |
| GeneCards | Ulcerative Colitis | ENSG00000259202 |
| GeneCards | Ulcerative Colitis | ENSG00000259605 |
| GeneCards | Ulcerative Colitis | ENSG00000260577 |
| GeneCards | Ulcerative Colitis | ENSG00000260651 |
| GeneCards | Ulcerative Colitis | ENSG00000260773 |
| GeneCards | Ulcerative Colitis | ENSG00000261573 |
| GeneCards | Ulcerative Colitis | ENSG00000262020 |
| GeneCards | Ulcerative Colitis | ENSG00000263033 |
| GeneCards | Ulcerative Colitis | ENSG00000263756 |
| GeneCards | Ulcerative Colitis | ENSG00000266202 |
| GeneCards | Ulcerative Colitis | ENSG00000267303 |
| GeneCards | Ulcerative Colitis | ENSG00000267317 |
| GeneCards | Ulcerative Colitis | ENSG00000268746 |
| GeneCards | Ulcerative Colitis | ENSG00000268810 |
| GeneCards | Ulcerative Colitis | ENSG00000269514 |
| GeneCards | Ulcerative Colitis | ENSG00000269621 |
| GeneCards | Ulcerative Colitis | ENSG00000270659 |
| GeneCards | Ulcerative Colitis | ENSG00000271855 |
| GeneCards | Ulcerative Colitis | ENSG00000271936 |
| GeneCards | Ulcerative Colitis | ENSG00000272072 |
| GeneCards | Ulcerative Colitis | ENSG00000272109 |
| GeneCards | Ulcerative Colitis | ENSG00000272791 |
| GeneCards | Ulcerative Colitis | ENSG00000284779 |
| GeneCards | Ulcerative Colitis | ENSG00000284829 |
| GeneCards | Ulcerative Colitis | ENSG00000286116 |
| GeneCards | Ulcerative Colitis | FGFR1OP2P1      |
| GeneCards | Ulcerative Colitis | GLULP4          |
| GeneCards | Ulcerative Colitis | LINC01958       |
| GeneCards | Ulcerative Colitis | LINC02300       |

|           |                    |                 |
|-----------|--------------------|-----------------|
| GeneCards | Ulcerative Colitis | LINC02354       |
| GeneCards | Ulcerative Colitis | LINC02635       |
| GeneCards | Ulcerative Colitis | LINC02943       |
| GeneCards | Ulcerative Colitis | LOC101927745    |
| GeneCards | Ulcerative Colitis | LOC105369302    |
| GeneCards | Ulcerative Colitis | LOC105377730    |
| GeneCards | Ulcerative Colitis | LOC124901197    |
| GeneCards | Ulcerative Colitis | NPM1P17         |
| GeneCards | Ulcerative Colitis | PEBP1P3         |
| GeneCards | Ulcerative Colitis | PHB1P9          |
| GeneCards | Ulcerative Colitis | RN7SL391P       |
| GeneCards | Ulcerative Colitis | RN7SL51P        |
| GeneCards | Ulcerative Colitis | RNA5SP184       |
| GeneCards | Ulcerative Colitis | RNF186-AS1      |
| GeneCards | Ulcerative Colitis | RNU1-150P       |
| GeneCards | Ulcerative Colitis | RNU6-299P       |
| GeneCards | Ulcerative Colitis | RNU6-320P       |
| GeneCards | Ulcerative Colitis | RNU6-351P       |
| GeneCards | Ulcerative Colitis | RNU6-638P       |
| GeneCards | Ulcerative Colitis | RNU6-704P       |
| GeneCards | Ulcerative Colitis | RNU6-850P       |
| GeneCards | Ulcerative Colitis | RPL21P33        |
| GeneCards | Ulcerative Colitis | RPL23AP12       |
| GeneCards | Ulcerative Colitis | RPL32P17        |
| GeneCards | Ulcerative Colitis | RPL5P26         |
| GeneCards | Ulcerative Colitis | RPS23P10        |
| GeneCards | Ulcerative Colitis | RPSAP64         |
| GeneCards | Ulcerative Colitis | SPTLC1P1        |
| GeneCards | Ulcerative Colitis | SRRM1P3         |
| GeneCards | Ulcerative Colitis | TRG-TCC2-6      |
| GeneCards | Ulcerative Colitis | XPC-AS1         |
| GeneCards | Ulcerative Colitis | AIMP1P2         |
| GeneCards | Ulcerative Colitis | ENSG00000219159 |
| GeneCards | Ulcerative Colitis | ENSG00000222701 |
| GeneCards | Ulcerative Colitis | ENSG00000226032 |
| GeneCards | Ulcerative Colitis | ENSG00000234789 |
| GeneCards | Ulcerative Colitis | ENSG00000240996 |
| GeneCards | Ulcerative Colitis | ENSG00000247853 |
| GeneCards | Ulcerative Colitis | ENSG00000258860 |
| GeneCards | Ulcerative Colitis | ENSG00000273055 |
| GeneCards | Ulcerative Colitis | ENSG00000273961 |
| GeneCards | Ulcerative Colitis | ENSG00000276496 |
| GeneCards | Ulcerative Colitis | ENSG00000278020 |
| GeneCards | Ulcerative Colitis | ENSG00000278334 |

|           |                    |                 |
|-----------|--------------------|-----------------|
| GeneCards | Ulcerative Colitis | ENSG00000283321 |
| GeneCards | Ulcerative Colitis | ENSG00000283782 |
| GeneCards | Ulcerative Colitis | ENSG00000284633 |
| GeneCards | Ulcerative Colitis | ENSG00000285446 |
| GeneCards | Ulcerative Colitis | LINC02929       |
| GeneCards | Ulcerative Colitis | LINC02964       |
| GeneCards | Ulcerative Colitis | RNU6-144P       |
| GeneCards | Ulcerative Colitis | RNU6-70P        |
| GeneCards | Ulcerative Colitis | RNU7-15P        |
| GeneCards | Ulcerative Colitis | RPL35P9         |
| GeneCards | Ulcerative Colitis | RPLP0P7         |
| GeneCards | Ulcerative Colitis | RPS21P8         |
| GeneCards | Ulcerative Colitis | RPS29P21        |
| GeneCards | Ulcerative Colitis | RPS6P12         |
| GeneCards | Ulcerative Colitis | SNRPGP8         |
| GeneCards | Ulcerative Colitis | YBX1P5          |
| GeneCards | Ulcerative Colitis | BTF3L4P3        |
| GeneCards | Ulcerative Colitis | CHCHD2P3        |
| GeneCards | Ulcerative Colitis | ENSG00000225544 |
| GeneCards | Ulcerative Colitis | ENSG00000225931 |
| GeneCards | Ulcerative Colitis | ENSG00000228037 |
| GeneCards | Ulcerative Colitis | ENSG00000236710 |
| GeneCards | Ulcerative Colitis | ENSG00000237371 |
| GeneCards | Ulcerative Colitis | ENSG00000266728 |
| GeneCards | Ulcerative Colitis | ENSG00000268069 |
| GeneCards | Ulcerative Colitis | ENSG00000272630 |
| GeneCards | Ulcerative Colitis | ENSG00000274737 |
| GeneCards | Ulcerative Colitis | ENSG00000275693 |
| GeneCards | Ulcerative Colitis | ENSG00000277966 |
| GeneCards | Ulcerative Colitis | ENSG00000278592 |
| GeneCards | Ulcerative Colitis | ENSG00000283286 |
| GeneCards | Ulcerative Colitis | ENSG00000283573 |
| GeneCards | Ulcerative Colitis | ENSG00000285413 |
| GeneCards | Ulcerative Colitis | ENSG00000286518 |
| GeneCards | Ulcerative Colitis | ENSG00000287771 |
| GeneCards | Ulcerative Colitis | ENSG00000288583 |
| GeneCards | Ulcerative Colitis | ENSG00000289093 |
| GeneCards | Ulcerative Colitis | ENSG00000289465 |
| GeneCards | Ulcerative Colitis | HMG2P18         |
| GeneCards | Ulcerative Colitis | HNRNPA1P41      |
| GeneCards | Ulcerative Colitis | IDI1P2          |
| GeneCards | Ulcerative Colitis | LOC100129776    |
| GeneCards | Ulcerative Colitis | LOC124901411    |
| GeneCards | Ulcerative Colitis | LOC124903828    |

|           |                    |                 |
|-----------|--------------------|-----------------|
| GeneCards | Ulcerative Colitis | LOC124904333    |
| GeneCards | Ulcerative Colitis | MTND4P6         |
| GeneCards | Ulcerative Colitis | NIFKP1          |
| GeneCards | Ulcerative Colitis | NXPE2P1         |
| GeneCards | Ulcerative Colitis | PIGCP2          |
| GeneCards | Ulcerative Colitis | POLR2LP1        |
| GeneCards | Ulcerative Colitis | RN7SKP113       |
| GeneCards | Ulcerative Colitis | RN7SKP226       |
| GeneCards | Ulcerative Colitis | RN7SL72P        |
| GeneCards | Ulcerative Colitis | RNU6-119P       |
| GeneCards | Ulcerative Colitis | RNU6-222P       |
| GeneCards | Ulcerative Colitis | lnc-ASIC2-2     |
| GeneCards | Ulcerative Colitis | lnc-DDR1-4      |
| GeneCards | Ulcerative Colitis | lnc-FOSL2-2     |
| GeneCards | Ulcerative Colitis | lnc-GCA-5       |
| GeneCards | Ulcerative Colitis | lnc-HOXA11-1    |
| GeneCards | Ulcerative Colitis | lnc-HOXA13-1    |
| GeneCards | Ulcerative Colitis | lnc-IL10-5      |
| GeneCards | Ulcerative Colitis | lnc-ITGB1BP1-3  |
| GeneCards | Ulcerative Colitis | lnc-LAMB4-2     |
| GeneCards | Ulcerative Colitis | lnc-MAP3K7-3    |
| GeneCards | Ulcerative Colitis | lnc-MEGF6-3     |
| GeneCards | Ulcerative Colitis | lnc-PLEKHG6-4   |
| GeneCards | Ulcerative Colitis | lnc-PTGIR-2     |
| GeneCards | Ulcerative Colitis | lnc-SCNN1A-1    |
| GeneCards | Ulcerative Colitis | lnc-STK11-2     |
| GeneCards | Ulcerative Colitis | lnc-TH-1        |
| GeneCards | Ulcerative Colitis | lnc-TMED10-5    |
| GeneCards | Ulcerative Colitis | lnc-TMEM50B-3   |
| GeneCards | Ulcerative Colitis | lnc-TNFSF18-1   |
| GeneCards | Ulcerative Colitis | AB372574        |
| GeneCards | Ulcerative Colitis | DNAJB12P1       |
| GeneCards | Ulcerative Colitis | ENSG00000213386 |
| GeneCards | Ulcerative Colitis | ENSG00000224431 |
| GeneCards | Ulcerative Colitis | ENSG00000224988 |
| GeneCards | Ulcerative Colitis | ENSG00000230147 |
| GeneCards | Ulcerative Colitis | ENSG00000232499 |
| GeneCards | Ulcerative Colitis | ENSG00000240399 |
| GeneCards | Ulcerative Colitis | ENSG00000253683 |
| GeneCards | Ulcerative Colitis | ENSG00000254755 |
| GeneCards | Ulcerative Colitis | ENSG00000262488 |
| GeneCards | Ulcerative Colitis | ENSG00000271547 |
| GeneCards | Ulcerative Colitis | ENSG00000273112 |
| GeneCards | Ulcerative Colitis | ENSG00000285552 |

|           |                    |                   |
|-----------|--------------------|-------------------|
| GeneCards | Ulcerative Colitis | ENSG00000285616   |
| GeneCards | Ulcerative Colitis | ENSG00000285837   |
| GeneCards | Ulcerative Colitis | ENSG00000286186   |
| GeneCards | Ulcerative Colitis | ENSG00000286629   |
| GeneCards | Ulcerative Colitis | ENSG00000286974   |
| GeneCards | Ulcerative Colitis | ENSG00000287967   |
| GeneCards | Ulcerative Colitis | ENSG00000288064   |
| GeneCards | Ulcerative Colitis | ENSG00000288924   |
| GeneCards | Ulcerative Colitis | ENSG00000288956   |
| GeneCards | Ulcerative Colitis | ENSG00000289610   |
| GeneCards | Ulcerative Colitis | ENSG00000289701   |
| GeneCards | Ulcerative Colitis | HSALNG0000115     |
| GeneCards | Ulcerative Colitis | HSALNG0000116     |
| GeneCards | Ulcerative Colitis | HSALNG0001400     |
| GeneCards | Ulcerative Colitis | HSALNG0001696     |
| GeneCards | Ulcerative Colitis | HSALNG0007192-001 |
| GeneCards | Ulcerative Colitis | HSALNG0007924     |
| GeneCards | Ulcerative Colitis | HSALNG0013864     |
| GeneCards | Ulcerative Colitis | HSALNG0017399     |
| GeneCards | Ulcerative Colitis | HSALNG0023077     |
| GeneCards | Ulcerative Colitis | HSALNG0027634     |
| GeneCards | Ulcerative Colitis | HSALNG0046923     |
| GeneCards | Ulcerative Colitis | HSALNG0049103     |
| GeneCards | Ulcerative Colitis | HSALNG0052454     |
| GeneCards | Ulcerative Colitis | HSALNG0077026     |
| GeneCards | Ulcerative Colitis | HSALNG0077027     |
| GeneCards | Ulcerative Colitis | HSALNG0078328     |
| GeneCards | Ulcerative Colitis | HSALNG0078890     |
| GeneCards | Ulcerative Colitis | HSALNG0079213     |
| GeneCards | Ulcerative Colitis | HSALNG0082195     |
| GeneCards | Ulcerative Colitis | HSALNG0082198     |
| GeneCards | Ulcerative Colitis | HSALNG0084963     |
| GeneCards | Ulcerative Colitis | HSALNG0084964     |
| GeneCards | Ulcerative Colitis | HSALNG0084965     |
| GeneCards | Ulcerative Colitis | HSALNG0086605     |
| GeneCards | Ulcerative Colitis | HSALNG0088100     |
| GeneCards | Ulcerative Colitis | HSALNG0088101     |
| GeneCards | Ulcerative Colitis | HSALNG0088102     |
| GeneCards | Ulcerative Colitis | HSALNG0088845     |
| GeneCards | Ulcerative Colitis | HSALNG0088846     |
| GeneCards | Ulcerative Colitis | HSALNG0092134     |
| GeneCards | Ulcerative Colitis | HSALNG0094037     |
| GeneCards | Ulcerative Colitis | HSALNG0102509     |
| GeneCards | Ulcerative Colitis | HSALNG0102510     |

|           |                    |                     |
|-----------|--------------------|---------------------|
| GeneCards | Ulcerative Colitis | HSALNG0103019       |
| GeneCards | Ulcerative Colitis | HSALNG0120134       |
| GeneCards | Ulcerative Colitis | HSALNG0120135       |
| GeneCards | Ulcerative Colitis | HSALNG0122987       |
| GeneCards | Ulcerative Colitis | HSALNG0122988       |
| GeneCards | Ulcerative Colitis | HSALNG0132765       |
| GeneCards | Ulcerative Colitis | HSALNG0135137       |
| GeneCards | Ulcerative Colitis | L13712-019          |
| GeneCards | Ulcerative Colitis | LOC100131264        |
| GeneCards | Ulcerative Colitis | LOC100533842        |
| GeneCards | Ulcerative Colitis | LOC124900868        |
| GeneCards | Ulcerative Colitis | LOC124902436        |
| GeneCards | Ulcerative Colitis | LOC124903162        |
| GeneCards | Ulcerative Colitis | MK280269-012        |
| GeneCards | Ulcerative Colitis | MK280466            |
| GeneCards | Ulcerative Colitis | MN298114-203        |
| GeneCards | Ulcerative Colitis | MN309174-057        |
| GeneCards | Ulcerative Colitis | MN309183            |
| GeneCards | Ulcerative Colitis | MN309431            |
| GeneCards | Ulcerative Colitis | MN830915            |
| GeneCards | Ulcerative Colitis | NONHSAG001750.2     |
| GeneCards | Ulcerative Colitis | NONHSAG003874.2     |
| GeneCards | Ulcerative Colitis | NONHSAG026080.2     |
| GeneCards | Ulcerative Colitis | NONHSAG031883.2-001 |
| GeneCards | Ulcerative Colitis | NONHSAG041785.2     |
| GeneCards | Ulcerative Colitis | NONHSAG043568.2     |
| GeneCards | Ulcerative Colitis | OA985550            |
| GeneCards | Ulcerative Colitis | PPIAP34             |
| GeneCards | Ulcerative Colitis | RF00017-1167        |
| GeneCards | Ulcerative Colitis | RF00017-1484        |
| GeneCards | Ulcerative Colitis | RF00017-1797        |
| GeneCards | Ulcerative Colitis | RF00017-1942        |
| GeneCards | Ulcerative Colitis | RF00017-2502        |
| GeneCards | Ulcerative Colitis | RF00017-2701        |
| GeneCards | Ulcerative Colitis | RF00017-306         |
| GeneCards | Ulcerative Colitis | RF00017-3270        |
| GeneCards | Ulcerative Colitis | RF00017-4256        |
| GeneCards | Ulcerative Colitis | RF00017-4586        |
| GeneCards | Ulcerative Colitis | RF00017-4737        |
| GeneCards | Ulcerative Colitis | RF00017-5014        |
| GeneCards | Ulcerative Colitis | RF00017-5028        |
| GeneCards | Ulcerative Colitis | RF00017-5032        |
| GeneCards | Ulcerative Colitis | RF00017-5297        |



|           |                    |                  |
|-----------|--------------------|------------------|
| GeneCards | Ulcerative Colitis | RF00017-5605     |
| GeneCards | Ulcerative Colitis | RF00017-6059     |
| GeneCards | Ulcerative Colitis | RF00017-6082     |
| GeneCards | Ulcerative Colitis | RF00017-6147     |
| GeneCards | Ulcerative Colitis | RF00483          |
| GeneCards | Ulcerative Colitis | ZYXP1            |
| GeneCards | Ulcerative Colitis | hsa-miR-5096-095 |
| GeneCards | Ulcerative Colitis | lnc-AHR-4        |
| GeneCards | Ulcerative Colitis | lnc-ANKRD33B-6   |
| GeneCards | Ulcerative Colitis | lnc-ANKRD33B-7   |
| GeneCards | Ulcerative Colitis | lnc-ARFRP1-1     |
| GeneCards | Ulcerative Colitis | lnc-ARHGAP20-11  |
| GeneCards | Ulcerative Colitis | lnc-ATP6V1G3-5   |
| GeneCards | Ulcerative Colitis | lnc-ATP6V1G3-6   |
| GeneCards | Ulcerative Colitis | lnc-AUH-8        |
| GeneCards | Ulcerative Colitis | lnc-C1QTNF1-9    |
| GeneCards | Ulcerative Colitis | lnc-C9orf78-2    |
| GeneCards | Ulcerative Colitis | lnc-CALM3-3      |
| GeneCards | Ulcerative Colitis | lnc-CEP76-3      |
| GeneCards | Ulcerative Colitis | lnc-CLEC16A-4    |
| GeneCards | Ulcerative Colitis | lnc-CREB5-4      |
| GeneCards | Ulcerative Colitis | lnc-CTIF-9       |
| GeneCards | Ulcerative Colitis | lnc-CTNND2-10    |
| GeneCards | Ulcerative Colitis | lnc-CTNND2-6     |
| GeneCards | Ulcerative Colitis | lnc-DSE-1        |
| GeneCards | Ulcerative Colitis | lnc-DUSP1-7      |
| GeneCards | Ulcerative Colitis | lnc-FAM109A-1    |
| GeneCards | Ulcerative Colitis | lnc-FAM96A-1     |
| GeneCards | Ulcerative Colitis | lnc-FCGR3A-2     |
| GeneCards | Ulcerative Colitis | lnc-FCGR3A-4     |
| GeneCards | Ulcerative Colitis | lnc-FNBP1-2      |
| GeneCards | Ulcerative Colitis | lnc-GRB7-1       |
| GeneCards | Ulcerative Colitis | lnc-HDAC11-4     |
| GeneCards | Ulcerative Colitis | lnc-HLA-A-2      |
| GeneCards | Ulcerative Colitis | lnc-HLA-DQA1-9   |
| GeneCards | Ulcerative Colitis | lnc-HLA-DRB1-7   |
| GeneCards | Ulcerative Colitis | lnc-HOXA13-3     |
| GeneCards | Ulcerative Colitis | lnc-IGF2-4       |
| GeneCards | Ulcerative Colitis | lnc-IKZF1-5      |
| GeneCards | Ulcerative Colitis | lnc-IL31RA-5     |
| GeneCards | Ulcerative Colitis | lnc-IL6ST-2      |
| GeneCards | Ulcerative Colitis | lnc-IRF1-1       |
| GeneCards | Ulcerative Colitis | lnc-IRF1-7       |
| GeneCards | Ulcerative Colitis | lnc-LAMB4-3      |

|           |                    |                 |
|-----------|--------------------|-----------------|
| GeneCards | Ulcerative Colitis | lnc-LIPG-7      |
| GeneCards | Ulcerative Colitis | lnc-MIEN1-1     |
| GeneCards | Ulcerative Colitis | lnc-MMEL1-1     |
| GeneCards | Ulcerative Colitis | lnc-MMEL1-2     |
| GeneCards | Ulcerative Colitis | lnc-MRPL23-2    |
| GeneCards | Ulcerative Colitis | lnc-MST1-1      |
| GeneCards | Ulcerative Colitis | lnc-MTPAP-7     |
| GeneCards | Ulcerative Colitis | lnc-NBN-9       |
| GeneCards | Ulcerative Colitis | lnc-NEK7-4      |
| GeneCards | Ulcerative Colitis | lnc-NFKBIZ-2    |
| GeneCards | Ulcerative Colitis | lnc-NFKBIZ-3    |
| GeneCards | Ulcerative Colitis | lnc-OLIG3-1     |
| GeneCards | Ulcerative Colitis | lnc-OR8D4-1     |
| GeneCards | Ulcerative Colitis | lnc-ORMDL3-2    |
| GeneCards | Ulcerative Colitis | lnc-PDGFB-3     |
| GeneCards | Ulcerative Colitis | lnc-PSMA6-6     |
| GeneCards | Ulcerative Colitis | lnc-PSORS1C2-1  |
| GeneCards | Ulcerative Colitis | lnc-PTGER4-8    |
| GeneCards | Ulcerative Colitis | lnc-PTGIR-1     |
| GeneCards | Ulcerative Colitis | lnc-PWP2-2      |
| GeneCards | Ulcerative Colitis | lnc-RAB5B-2     |
| GeneCards | Ulcerative Colitis | lnc-RIPK2-3     |
| GeneCards | Ulcerative Colitis | lnc-RTN4IP1-6   |
| GeneCards | Ulcerative Colitis | lnc-RTTN-6      |
| GeneCards | Ulcerative Colitis | lnc-SBNO2-2     |
| GeneCards | Ulcerative Colitis | lnc-SCGB2B2-133 |
| GeneCards | Ulcerative Colitis | lnc-SCGB2B2-4   |
| GeneCards | Ulcerative Colitis | lnc-SCNN1A-2    |
| GeneCards | Ulcerative Colitis | lnc-SEH1L-5     |
| GeneCards | Ulcerative Colitis | lnc-SLC34A1-3   |
| GeneCards | Ulcerative Colitis | lnc-SNX13-5     |
| GeneCards | Ulcerative Colitis | lnc-STMN3-5     |
| GeneCards | Ulcerative Colitis | lnc-TM9SF2-7    |
| GeneCards | Ulcerative Colitis | lnc-TMED10-4    |
| GeneCards | Ulcerative Colitis | lnc-TMEM258-1   |
| GeneCards | Ulcerative Colitis | lnc-TMEM268-4   |
| GeneCards | Ulcerative Colitis | lnc-TNFRSF14-1  |
| GeneCards | Ulcerative Colitis | lnc-TNFRSF14-3  |
| GeneCards | Ulcerative Colitis | lnc-TNFRSF1A-1  |
| GeneCards | Ulcerative Colitis | lnc-TNFSF18-3   |
| GeneCards | Ulcerative Colitis | lnc-TNNI2-2     |
| GeneCards | Ulcerative Colitis | lnc-TRAPPC3L-2  |
| GeneCards | Ulcerative Colitis | lnc-TRRAP-5     |
| GeneCards | Ulcerative Colitis | lnc-USP20-5     |

|           |                    |                   |
|-----------|--------------------|-------------------|
| GeneCards | Ulcerative Colitis | lnc-USP25-6       |
| GeneCards | Ulcerative Colitis | lnc-USP36-4       |
| GeneCards | Ulcerative Colitis | lnc-WASHC5-9      |
| GeneCards | Ulcerative Colitis | lnc-ZC3H12C-5     |
| GeneCards | Ulcerative Colitis | lnc-ZCCHC24-7     |
| GeneCards | Ulcerative Colitis | piR-33458         |
| GeneCards | Ulcerative Colitis | piR-43104-029     |
| GeneCards | Ulcerative Colitis | piR-44878-042     |
| GeneCards | Ulcerative Colitis | piR-48950-118     |
| GeneCards | Ulcerative Colitis | piR-50437-624     |
| GeneCards | Ulcerative Colitis | piR-50444-374     |
| GeneCards | Ulcerative Colitis | piR-51137-090     |
| GeneCards | Ulcerative Colitis | piR-52079-043     |
| GeneCards | Ulcerative Colitis | piR-53431-298     |
| GeneCards | Ulcerative Colitis | piR-55650-032     |
| GeneCards | Ulcerative Colitis | piR-56480-084     |
| GeneCards | Ulcerative Colitis | piR-57133-098     |
| GeneCards | Ulcerative Colitis | piR-59241         |
| GeneCards | Ulcerative Colitis | CHORDC1P5         |
| GeneCards | Ulcerative Colitis | ENSG00000220412   |
| GeneCards | Ulcerative Colitis | ENSG00000227836   |
| GeneCards | Ulcerative Colitis | ENSG00000254926   |
| GeneCards | Ulcerative Colitis | ENSG00000259970   |
| GeneCards | Ulcerative Colitis | ENSG00000285560   |
| GeneCards | Ulcerative Colitis | ENSG00000289306   |
| GeneCards | Ulcerative Colitis | HG983680          |
| GeneCards | Ulcerative Colitis | HQ292134          |
| GeneCards | Ulcerative Colitis | HSALNG0000278     |
| GeneCards | Ulcerative Colitis | HSALNG0000283     |
| GeneCards | Ulcerative Colitis | HSALNG0000284     |
| GeneCards | Ulcerative Colitis | HSALNG0001405     |
| GeneCards | Ulcerative Colitis | HSALNG0006204     |
| GeneCards | Ulcerative Colitis | HSALNG0007401     |
| GeneCards | Ulcerative Colitis | HSALNG0007483     |
| GeneCards | Ulcerative Colitis | HSALNG0007877     |
| GeneCards | Ulcerative Colitis | HSALNG0008492     |
| GeneCards | Ulcerative Colitis | HSALNG0009608     |
| GeneCards | Ulcerative Colitis | HSALNG0009609     |
| GeneCards | Ulcerative Colitis | HSALNG0015256     |
| GeneCards | Ulcerative Colitis | HSALNG0015265     |
| GeneCards | Ulcerative Colitis | HSALNG0015266     |
| GeneCards | Ulcerative Colitis | HSALNG0015371     |
| GeneCards | Ulcerative Colitis | HSALNG0017398-002 |
| GeneCards | Ulcerative Colitis | HSALNG0020027     |

|           |                    |                   |
|-----------|--------------------|-------------------|
| GeneCards | Ulcerative Colitis | HSALNG0021690     |
| GeneCards | Ulcerative Colitis | HSALNG0022027     |
| GeneCards | Ulcerative Colitis | HSALNG0022244     |
| GeneCards | Ulcerative Colitis | HSALNG0023605     |
| GeneCards | Ulcerative Colitis | HSALNG0023609     |
| GeneCards | Ulcerative Colitis | HSALNG0027636     |
| GeneCards | Ulcerative Colitis | HSALNG0036088     |
| GeneCards | Ulcerative Colitis | HSALNG0041154     |
| GeneCards | Ulcerative Colitis | HSALNG0041374     |
| GeneCards | Ulcerative Colitis | HSALNG0042579     |
| GeneCards | Ulcerative Colitis | HSALNG0043662     |
| GeneCards | Ulcerative Colitis | HSALNG0044846     |
| GeneCards | Ulcerative Colitis | HSALNG0046199     |
| GeneCards | Ulcerative Colitis | HSALNG0048249     |
| GeneCards | Ulcerative Colitis | HSALNG0049105     |
| GeneCards | Ulcerative Colitis | HSALNG0049125     |
| GeneCards | Ulcerative Colitis | HSALNG0049351     |
| GeneCards | Ulcerative Colitis | HSALNG0049423     |
| GeneCards | Ulcerative Colitis | HSALNG0049424     |
| GeneCards | Ulcerative Colitis | HSALNG0049431     |
| GeneCards | Ulcerative Colitis | HSALNG0050236     |
| GeneCards | Ulcerative Colitis | HSALNG0052448     |
| GeneCards | Ulcerative Colitis | HSALNG0053003     |
| GeneCards | Ulcerative Colitis | HSALNG0053005     |
| GeneCards | Ulcerative Colitis | HSALNG0055751     |
| GeneCards | Ulcerative Colitis | HSALNG0060048     |
| GeneCards | Ulcerative Colitis | HSALNG0060454     |
| GeneCards | Ulcerative Colitis | HSALNG0066832     |
| GeneCards | Ulcerative Colitis | HSALNG0068535     |
| GeneCards | Ulcerative Colitis | HSALNG0068536-001 |
| GeneCards | Ulcerative Colitis | HSALNG0068897-001 |
| GeneCards | Ulcerative Colitis | HSALNG0068898     |
| GeneCards | Ulcerative Colitis | HSALNG0069758     |
| GeneCards | Ulcerative Colitis | HSALNG0073924     |
| GeneCards | Ulcerative Colitis | HSALNG0074773     |
| GeneCards | Ulcerative Colitis | HSALNG0074775     |
| GeneCards | Ulcerative Colitis | HSALNG0075913     |
| GeneCards | Ulcerative Colitis | HSALNG0078329     |
| GeneCards | Ulcerative Colitis | HSALNG0078331     |
| GeneCards | Ulcerative Colitis | HSALNG0079128     |
| GeneCards | Ulcerative Colitis | HSALNG0079551     |
| GeneCards | Ulcerative Colitis | HSALNG0080046     |
| GeneCards | Ulcerative Colitis | HSALNG0080050     |
| GeneCards | Ulcerative Colitis | HSALNG0080051     |

|           |                    |                   |
|-----------|--------------------|-------------------|
| GeneCards | Ulcerative Colitis | HSALNG0084356     |
| GeneCards | Ulcerative Colitis | HSALNG0085864     |
| GeneCards | Ulcerative Colitis | HSALNG0085865     |
| GeneCards | Ulcerative Colitis | HSALNG0088853-002 |
| GeneCards | Ulcerative Colitis | HSALNG0091478     |
| GeneCards | Ulcerative Colitis | HSALNG0092137     |
| GeneCards | Ulcerative Colitis | HSALNG0092143     |
| GeneCards | Ulcerative Colitis | HSALNG0094038     |
| GeneCards | Ulcerative Colitis | HSALNG0095902     |
| GeneCards | Ulcerative Colitis | HSALNG0096529-002 |
| GeneCards | Ulcerative Colitis | HSALNG0098906     |
| GeneCards | Ulcerative Colitis | HSALNG0098908     |
| GeneCards | Ulcerative Colitis | HSALNG0100581     |
| GeneCards | Ulcerative Colitis | HSALNG0100582     |
| GeneCards | Ulcerative Colitis | HSALNG0106744     |
| GeneCards | Ulcerative Colitis | HSALNG0108142     |
| GeneCards | Ulcerative Colitis | HSALNG0109573     |
| GeneCards | Ulcerative Colitis | HSALNG0109575     |
| GeneCards | Ulcerative Colitis | HSALNG0110496     |
| GeneCards | Ulcerative Colitis | HSALNG0110740     |
| GeneCards | Ulcerative Colitis | HSALNG0111330     |
| GeneCards | Ulcerative Colitis | HSALNG0113256     |
| GeneCards | Ulcerative Colitis | HSALNG0115400     |
| GeneCards | Ulcerative Colitis | HSALNG0115423     |
| GeneCards | Ulcerative Colitis | HSALNG0116274     |
| GeneCards | Ulcerative Colitis | HSALNG0127574     |
| GeneCards | Ulcerative Colitis | HSALNG0130310     |
| GeneCards | Ulcerative Colitis | HSALNG0130311     |
| GeneCards | Ulcerative Colitis | HSALNG0130312     |
| GeneCards | Ulcerative Colitis | HSALNG0130314     |
| GeneCards | Ulcerative Colitis | HSALNG0130316     |
| GeneCards | Ulcerative Colitis | HSALNG0130695     |
| GeneCards | Ulcerative Colitis | HSALNG0132000     |
| GeneCards | Ulcerative Colitis | HSALNG0133104     |
| GeneCards | Ulcerative Colitis | HSALNG0133110     |
| GeneCards | Ulcerative Colitis | HSALNG0133311     |
| GeneCards | Ulcerative Colitis | HSALNG0134847     |
| GeneCards | Ulcerative Colitis | HSALNG0136252     |
| GeneCards | Ulcerative Colitis | LOC101927897      |
| GeneCards | Ulcerative Colitis | LOC105373724      |
| GeneCards | Ulcerative Colitis | LOC105373831      |
| GeneCards | Ulcerative Colitis | LOC105375070      |
| GeneCards | Ulcerative Colitis | LOC107984500      |
| GeneCards | Ulcerative Colitis | LOC107984859      |

|           |                    |                     |
|-----------|--------------------|---------------------|
| GeneCards | Ulcerative Colitis | LOC107985926        |
| GeneCards | Ulcerative Colitis | LOC112268088        |
| GeneCards | Ulcerative Colitis | LOC124901064        |
| GeneCards | Ulcerative Colitis | LOC124901449        |
| GeneCards | Ulcerative Colitis | LOC124902309        |
| GeneCards | Ulcerative Colitis | LOC124902787        |
| GeneCards | Ulcerative Colitis | LOC124902926        |
| GeneCards | Ulcerative Colitis | LOC124903019        |
| GeneCards | Ulcerative Colitis | LOC124903198        |
| GeneCards | Ulcerative Colitis | LOC124903774        |
| GeneCards | Ulcerative Colitis | LOC124904334        |
| GeneCards | Ulcerative Colitis | LOC646347           |
| GeneCards | Ulcerative Colitis | MK280144-291        |
| GeneCards | Ulcerative Colitis | MK280194            |
| GeneCards | Ulcerative Colitis | MN297696            |
| GeneCards | Ulcerative Colitis | MN298214            |
| GeneCards | Ulcerative Colitis | MN298667            |
| GeneCards | Ulcerative Colitis | MN309174-585        |
| GeneCards | Ulcerative Colitis | MN309188            |
| GeneCards | Ulcerative Colitis | NONHSAG008489.2     |
| GeneCards | Ulcerative Colitis | NONHSAG017238.2     |
| GeneCards | Ulcerative Colitis | NONHSAG031883.2-002 |
| GeneCards | Ulcerative Colitis | NONHSAG045774.2     |
| GeneCards | Ulcerative Colitis | NONHSAG046846.2     |
| GeneCards | Ulcerative Colitis | RF00001-253         |
| GeneCards | Ulcerative Colitis | RF00017-1288        |
| GeneCards | Ulcerative Colitis | RF00017-263         |
| GeneCards | Ulcerative Colitis | RF00017-2892        |
| GeneCards | Ulcerative Colitis | RF00017-2956        |
| GeneCards | Ulcerative Colitis | RF00017-3029        |
| GeneCards | Ulcerative Colitis | RF00017-3141        |
| GeneCards | Ulcerative Colitis | RF00017-3467        |
| GeneCards | Ulcerative Colitis | RF00017-3468        |
| GeneCards | Ulcerative Colitis | RF00017-3680        |
| GeneCards | Ulcerative Colitis | RF00017-4020        |
| GeneCards | Ulcerative Colitis | RF00017-4260        |
| GeneCards | Ulcerative Colitis | RF00017-4341        |
| GeneCards | Ulcerative Colitis | RF00017-4732        |
| GeneCards | Ulcerative Colitis | RF00017-5281        |
| GeneCards | Ulcerative Colitis | RF00017-5613        |
| GeneCards | Ulcerative Colitis | RF00017-5659        |
| GeneCards | Ulcerative Colitis | RF00017-7564        |
| GeneCards | Ulcerative Colitis | RF00994-753         |

|           |                    |                  |
|-----------|--------------------|------------------|
| GeneCards | Ulcerative Colitis | RNU7-147P        |
| GeneCards | Ulcerative Colitis | RPL22P23         |
| GeneCards | Ulcerative Colitis | hsa-miR-5095-437 |
| GeneCards | Ulcerative Colitis | lnc-ACAP3-2-001  |
| GeneCards | Ulcerative Colitis | lnc-ANKRD33B-5   |
| GeneCards | Ulcerative Colitis | lnc-BOLL-6       |
| GeneCards | Ulcerative Colitis | lnc-CAB39L-9     |
| GeneCards | Ulcerative Colitis | lnc-CCDC8-6      |
| GeneCards | Ulcerative Colitis | lnc-CDH3-5       |
| GeneCards | Ulcerative Colitis | lnc-CEP76-2      |
| GeneCards | Ulcerative Colitis | lnc-CYTL1-3      |
| GeneCards | Ulcerative Colitis | lnc-DNLZ-1       |
| GeneCards | Ulcerative Colitis | lnc-DYRK2-15     |
| GeneCards | Ulcerative Colitis | lnc-FOXD1-3      |
| GeneCards | Ulcerative Colitis | lnc-GOT1-1       |
| GeneCards | Ulcerative Colitis | lnc-HLA-DRB1-3   |
| GeneCards | Ulcerative Colitis | lnc-HNF4A-1      |
| GeneCards | Ulcerative Colitis | lnc-ICAM3-1      |
| GeneCards | Ulcerative Colitis | lnc-IL12B-2      |
| GeneCards | Ulcerative Colitis | lnc-IL19-2       |
| GeneCards | Ulcerative Colitis | lnc-IQCH-5       |
| GeneCards | Ulcerative Colitis | lnc-ITGB1BP1-2   |
| GeneCards | Ulcerative Colitis | lnc-LINGO4-1     |
| GeneCards | Ulcerative Colitis | lnc-PRDM1-1      |
| GeneCards | Ulcerative Colitis | lnc-PRKCD-2      |
| GeneCards | Ulcerative Colitis | lnc-REL-2        |
| GeneCards | Ulcerative Colitis | lnc-SFMBT1-5     |
| GeneCards | Ulcerative Colitis | lnc-SLC37A1-2    |
| GeneCards | Ulcerative Colitis | lnc-TTC33-6      |
| GeneCards | Ulcerative Colitis | lnc-WNT4-6       |
| GeneCards | Ulcerative Colitis | lnc-ZMAT5-2      |
| GeneCards | Ulcerative Colitis | piR-30396        |
| GeneCards | Ulcerative Colitis | piR-31152        |
| GeneCards | Ulcerative Colitis | piR-31292-113    |
| GeneCards | Ulcerative Colitis | piR-31937-039    |
| GeneCards | Ulcerative Colitis | piR-31937-161    |
| GeneCards | Ulcerative Colitis | piR-32285-103    |
| GeneCards | Ulcerative Colitis | piR-32461-022    |
| GeneCards | Ulcerative Colitis | piR-33432-055    |
| GeneCards | Ulcerative Colitis | piR-33804-078    |
| GeneCards | Ulcerative Colitis | piR-36455        |
| GeneCards | Ulcerative Colitis | piR-37170-040    |
| GeneCards | Ulcerative Colitis | piR-37824        |
| GeneCards | Ulcerative Colitis | piR-38259        |

|           |                    |               |
|-----------|--------------------|---------------|
| GeneCards | Ulcerative Colitis | piR-38319     |
| GeneCards | Ulcerative Colitis | piR-39098-183 |
| GeneCards | Ulcerative Colitis | piR-39099-151 |
| GeneCards | Ulcerative Colitis | piR-39701-054 |
| GeneCards | Ulcerative Colitis | piR-41306-095 |
| GeneCards | Ulcerative Colitis | piR-41306-110 |
| GeneCards | Ulcerative Colitis | piR-43099-059 |
| GeneCards | Ulcerative Colitis | piR-43103-062 |
| GeneCards | Ulcerative Colitis | piR-43105-342 |
| GeneCards | Ulcerative Colitis | piR-43325-002 |
| GeneCards | Ulcerative Colitis | piR-43939-002 |
| GeneCards | Ulcerative Colitis | piR-44610-008 |
| GeneCards | Ulcerative Colitis | piR-44610-011 |
| GeneCards | Ulcerative Colitis | piR-45035-151 |
| GeneCards | Ulcerative Colitis | piR-45932-058 |
| GeneCards | Ulcerative Colitis | piR-46002-152 |
| GeneCards | Ulcerative Colitis | piR-46391-002 |
| GeneCards | Ulcerative Colitis | piR-47234     |
| GeneCards | Ulcerative Colitis | piR-48007     |
| GeneCards | Ulcerative Colitis | piR-48325-110 |
| GeneCards | Ulcerative Colitis | piR-48325-111 |
| GeneCards | Ulcerative Colitis | piR-48759-293 |
| GeneCards | Ulcerative Colitis | piR-48820-008 |
| GeneCards | Ulcerative Colitis | piR-48852     |
| GeneCards | Ulcerative Colitis | piR-49732-033 |
| GeneCards | Ulcerative Colitis | piR-50308-096 |
| GeneCards | Ulcerative Colitis | piR-50346     |
| GeneCards | Ulcerative Colitis | piR-50437-360 |
| GeneCards | Ulcerative Colitis | piR-50893     |
| GeneCards | Ulcerative Colitis | piR-51267-027 |
| GeneCards | Ulcerative Colitis | piR-51327     |
| GeneCards | Ulcerative Colitis | piR-51449     |
| GeneCards | Ulcerative Colitis | piR-52079-091 |
| GeneCards | Ulcerative Colitis | piR-52916-031 |
| GeneCards | Ulcerative Colitis | piR-55186-001 |
| GeneCards | Ulcerative Colitis | piR-55281-150 |
| GeneCards | Ulcerative Colitis | piR-55361-212 |
| GeneCards | Ulcerative Colitis | piR-55655-375 |
| GeneCards | Ulcerative Colitis | piR-55985-185 |
| GeneCards | Ulcerative Colitis | piR-56341-125 |
| GeneCards | Ulcerative Colitis | piR-56341-188 |
| GeneCards | Ulcerative Colitis | piR-56480-015 |
| GeneCards | Ulcerative Colitis | piR-57133-396 |
| GeneCards | Ulcerative Colitis | piR-58297-114 |



|           |                    |                 |
|-----------|--------------------|-----------------|
| GeneCards | Ulcerative Colitis | piR-58538-001   |
| GeneCards | Ulcerative Colitis | piR-58538-016   |
| GeneCards | Ulcerative Colitis | piR-61101-324   |
| GeneCards | Ulcerative Colitis | piR-61101-576   |
| GeneCards | Ulcerative Colitis | piR-61240-151   |
| GeneCards | Ulcerative Colitis | piR-61945-308   |
| GeneCards | Ulcerative Colitis | ENSG00000279625 |
| GeneCards | Ulcerative Colitis | HSALNG0001583   |
| GeneCards | Ulcerative Colitis | HSALNG0015546   |
| GeneCards | Ulcerative Colitis | HSALNG0023723   |
| GeneCards | Ulcerative Colitis | HSALNG0032571   |
| GeneCards | Ulcerative Colitis | HSALNG0032579   |
| GeneCards | Ulcerative Colitis | HSALNG0041355   |
| GeneCards | Ulcerative Colitis | HSALNG0050238   |
| GeneCards | Ulcerative Colitis | HSALNG0052450   |
| GeneCards | Ulcerative Colitis | HSALNG0055975   |
| GeneCards | Ulcerative Colitis | HSALNG0060455   |
| GeneCards | Ulcerative Colitis | HSALNG0077262   |
| GeneCards | Ulcerative Colitis | HSALNG0084357   |
| GeneCards | Ulcerative Colitis | HSALNG0129763   |
| GeneCards | Ulcerative Colitis | HSALNG0133108   |
| GeneCards | Ulcerative Colitis | LOC124903960    |
| GeneCards | Ulcerative Colitis | RF00017-405     |
| GeneCards | Ulcerative Colitis | RF00017-4592    |
| GeneCards | Ulcerative Colitis | RF00994-809     |
| GeneCards | Ulcerative Colitis | RF00994-819     |
| GeneCards | Ulcerative Colitis | lnc-ICAM3-2     |
| GeneCards | Ulcerative Colitis | lnc-TNFSF15-5   |
| GeneCards | Ulcerative Colitis | piR-38580-144   |
| GeneCards | Ulcerative Colitis | piR-39767-002   |
| GeneCards | Ulcerative Colitis | piR-40398       |
| GeneCards | Ulcerative Colitis | piR-48749-034   |
| GeneCards | Ulcerative Colitis | piR-56451-093   |
| GeneCards | Ulcerative Colitis | piR-58538-006   |
| GeneCards | Ulcerative Colitis | piR-58538-007   |
| GeneCards | Ulcerative Colitis | piR-58538-008   |
| GeneCards | Ulcerative Colitis | piR-58538-009   |
| GeneCards | Ulcerative Colitis | piR-58538-010   |
| GeneCards | Ulcerative Colitis | piR-58538-011   |
| GeneCards | Ulcerative Colitis | piR-58538-012   |
| GeneCards | Ulcerative Colitis | piR-58538-013   |
| GeneCards | Ulcerative Colitis | piR-58538-014   |
| GeneCards | Ulcerative Colitis | piR-58538-015   |
| GeneCards | Ulcerative Colitis | piR-60146-087   |

|           |                    |               |
|-----------|--------------------|---------------|
| GeneCards | Ulcerative Colitis | HSALNG0013825 |
| GeneCards | Ulcerative Colitis | HSALNG0079716 |
| GeneCards | Ulcerative Colitis | HSALNG0079717 |
| GeneCards | Ulcerative Colitis | LOC101927325  |
| GeneCards | Ulcerative Colitis | LOC105375444  |
| GeneCards | Ulcerative Colitis | LOC124901031  |
| GeneCards | Ulcerative Colitis | LOC124902409  |
| GeneCards | Ulcerative Colitis | LOC124907784  |
| GeneCards | Ulcerative Colitis | RF00017-212   |
| GeneCards | Ulcerative Colitis | piR-32810-138 |
| GeneCards | Ulcerative Colitis | piR-43107-300 |
| GeneCards | Ulcerative Colitis | SSTR2         |
| GeneCards | Ulcerative Colitis | SELENBP1      |
| GeneCards | Ulcerative Colitis | MAZ           |
| GeneCards | Ulcerative Colitis | CHMP5         |
| GeneCards | Ulcerative Colitis | CNR2          |
| GeneCards | Ulcerative Colitis | ASGR1         |
| GeneCards | Ulcerative Colitis | TAOK1         |
| GeneCards | Ulcerative Colitis | PNP           |
| GeneCards | Ulcerative Colitis | AMPH          |
| GeneCards | Ulcerative Colitis | MIR449A       |
| GeneCards | Ulcerative Colitis | CD74          |
| GeneCards | Ulcerative Colitis | SIK2          |
| GeneCards | Ulcerative Colitis | UBE2D3        |
| GeneCards | Ulcerative Colitis | POU2F1        |
| GeneCards | Ulcerative Colitis | LILRB4        |
| GeneCards | Ulcerative Colitis | CCL13         |
| GeneCards | Ulcerative Colitis | HIPK2         |
| GeneCards | Ulcerative Colitis | GIP           |
| GeneCards | Ulcerative Colitis | IFIT2         |
| GeneCards | Ulcerative Colitis | RBMS2         |
| GeneCards | Ulcerative Colitis | IL17D         |
| GeneCards | Ulcerative Colitis | COL5A2        |
| GeneCards | Ulcerative Colitis | TRAIP         |
| GeneCards | Ulcerative Colitis | INSR          |
| GeneCards | Ulcerative Colitis | CACNA1G       |
| GeneCards | Ulcerative Colitis | FZD4          |
| GeneCards | Ulcerative Colitis | PIK3R2        |
| GeneCards | Ulcerative Colitis | PRKACB        |
| GeneCards | Ulcerative Colitis | WNT7A         |
| GeneCards | Ulcerative Colitis | CASP2         |
| GeneCards | Ulcerative Colitis | CDK8          |
| GeneCards | Ulcerative Colitis | PLK4          |
| GeneCards | Ulcerative Colitis | WNT10B        |

|           |                    |         |
|-----------|--------------------|---------|
| GeneCards | Ulcerative Colitis | CSNK1E  |
| GeneCards | Ulcerative Colitis | FOLH1   |
| GeneCards | Ulcerative Colitis | FZD1    |
| GeneCards | Ulcerative Colitis | FZD6    |
| GeneCards | Ulcerative Colitis | HK2     |
| GeneCards | Ulcerative Colitis | IRS1    |
| GeneCards | Ulcerative Colitis | KDM4B   |
| GeneCards | Ulcerative Colitis | MELK    |
| GeneCards | Ulcerative Colitis | PPP2R1B |
| GeneCards | Ulcerative Colitis | RALA    |
| GeneCards | Ulcerative Colitis | ROS1    |
| GeneCards | Ulcerative Colitis | RRM2    |
| GeneCards | Ulcerative Colitis | HNRNPA1 |
| GeneCards | Ulcerative Colitis | PIK3R4  |
| GeneCards | Ulcerative Colitis | PSMB7   |
| GeneCards | Ulcerative Colitis | PXN     |
| GeneCards | Ulcerative Colitis | SHMT1   |
| GeneCards | Ulcerative Colitis | SOX5    |
| GeneCards | Ulcerative Colitis | CES2    |
| GeneCards | Ulcerative Colitis | E2F4    |
| GeneCards | Ulcerative Colitis | FZD10   |
| GeneCards | Ulcerative Colitis | HNRNPK  |
| GeneCards | Ulcerative Colitis | NUAK1   |
| GeneCards | Ulcerative Colitis | RUVBL1  |
| GeneCards | Ulcerative Colitis | STK24   |
| GeneCards | Ulcerative Colitis | WNT11   |
| GeneCards | Ulcerative Colitis | WNT5B   |
| GeneCards | Ulcerative Colitis | BAK1    |
| GeneCards | Ulcerative Colitis | LATS2   |
| GeneCards | Ulcerative Colitis | NLK     |
| GeneCards | Ulcerative Colitis | RALB    |
| GeneCards | Ulcerative Colitis | RICTOR  |
| GeneCards | Ulcerative Colitis | SFRP4   |
| GeneCards | Ulcerative Colitis | SLC16A7 |
| GeneCards | Ulcerative Colitis | TFDP1   |
| GeneCards | Ulcerative Colitis | TNIK    |
| GeneCards | Ulcerative Colitis | DKK2    |
| GeneCards | Ulcerative Colitis | FUT6    |
| GeneCards | Ulcerative Colitis | GRPR    |
| GeneCards | Ulcerative Colitis | HNRNPU  |
| GeneCards | Ulcerative Colitis | LASP1   |
| GeneCards | Ulcerative Colitis | MBD4    |
| GeneCards | Ulcerative Colitis | PBK     |
| GeneCards | Ulcerative Colitis | POLE2   |

|           |                    |          |
|-----------|--------------------|----------|
| GeneCards | Ulcerative Colitis | PTGES2   |
| GeneCards | Ulcerative Colitis | PZP      |
| GeneCards | Ulcerative Colitis | S100A11  |
| GeneCards | Ulcerative Colitis | SGK2     |
| GeneCards | Ulcerative Colitis | TRIM28   |
| GeneCards | Ulcerative Colitis | TWIST2   |
| GeneCards | Ulcerative Colitis | WNT7B    |
| GeneCards | Ulcerative Colitis | WNT8B    |
| GeneCards | Ulcerative Colitis | WNT9B    |
| GeneCards | Ulcerative Colitis | AGO2     |
| GeneCards | Ulcerative Colitis | BCL9     |
| GeneCards | Ulcerative Colitis | BNIP3    |
| GeneCards | Ulcerative Colitis | LLGL1    |
| GeneCards | Ulcerative Colitis | PTP4A1   |
| GeneCards | Ulcerative Colitis | PTP4A3   |
| GeneCards | Ulcerative Colitis | TCF7L1   |
| GeneCards | Ulcerative Colitis | WNT8A    |
| GeneCards | Ulcerative Colitis | CTNNBIP1 |
| GeneCards | Ulcerative Colitis | FAT4     |
| GeneCards | Ulcerative Colitis | EIF5A2   |
| GeneCards | Ulcerative Colitis | EXOC2    |
| GeneCards | Ulcerative Colitis | GNG4     |
| GeneCards | Ulcerative Colitis | GPA33    |
| GeneCards | Ulcerative Colitis | PLA2G4B  |
| GeneCards | Ulcerative Colitis | PMAIP1   |
| GeneCards | Ulcerative Colitis | RNF43    |
| GeneCards | Ulcerative Colitis | SFRP5    |
| GeneCards | Ulcerative Colitis | TMPRSS4  |
| GeneCards | Ulcerative Colitis | USP28    |
| GeneCards | Ulcerative Colitis | CLDND1   |
| GeneCards | Ulcerative Colitis | DKK4     |
| GeneCards | Ulcerative Colitis | HAPLN3   |
| GeneCards | Ulcerative Colitis | PHLPP1   |
| GeneCards | Ulcerative Colitis | PLXDC1   |
| GeneCards | Ulcerative Colitis | YBX1     |
| GeneCards | Ulcerative Colitis | ZFP36L2  |
| GeneCards | Ulcerative Colitis | EPDR1    |
| GeneCards | Ulcerative Colitis | GRK2     |
| GeneCards | Ulcerative Colitis | HOXB8    |
| GeneCards | Ulcerative Colitis | MACC1    |
| GeneCards | Ulcerative Colitis | NANOG    |
| GeneCards | Ulcerative Colitis | STRAP    |
| GeneCards | Ulcerative Colitis | VWA2     |
| GeneCards | Ulcerative Colitis | NOTUM    |

|           |                    |            |
|-----------|--------------------|------------|
| GeneCards | Ulcerative Colitis | FOXQ1      |
| GeneCards | Ulcerative Colitis | FAM98A     |
| GeneCards | Ulcerative Colitis | SEPTIN9    |
| GeneCards | Ulcerative Colitis | AOPEP      |
| GeneCards | Ulcerative Colitis | FAM98B     |
| GeneCards | Ulcerative Colitis | KRTDAP     |
| GeneCards | Ulcerative Colitis | P3H3       |
| GeneCards | Ulcerative Colitis | PALS1      |
| GeneCards | Ulcerative Colitis | SAPCD2     |
| GeneCards | Ulcerative Colitis | KRTAP9-2   |
| GeneCards | Ulcerative Colitis | MRGPRG     |
| GeneCards | Ulcerative Colitis | MRGPRE     |
| GeneCards | Ulcerative Colitis | WDCP       |
| GeneCards | Ulcerative Colitis | LINC00472  |
| GeneCards | Ulcerative Colitis | TP53TG1    |
| GeneCards | Ulcerative Colitis | COLCA1     |
| GeneCards | Ulcerative Colitis | COLCA2     |
| GeneCards | Ulcerative Colitis | MIR128-2   |
| GeneCards | Ulcerative Colitis | MIR32      |
| GeneCards | Ulcerative Colitis | MIR339     |
| GeneCards | Ulcerative Colitis | MIR96      |
| GeneCards | Ulcerative Colitis | SCARNA6    |
| GeneCards | Ulcerative Colitis | FTX        |
| GeneCards | Ulcerative Colitis | HOXB-AS3   |
| GeneCards | Ulcerative Colitis | MIR454     |
| GeneCards | Ulcerative Colitis | FBXL19-AS1 |
| GeneCards | Ulcerative Colitis | MRGPRG-AS1 |
| GeneCards | Ulcerative Colitis | SNHG17     |
| GeneCards | Ulcerative Colitis | SNHG3      |
| GeneCards | Ulcerative Colitis | CAHM       |
| GeneCards | Ulcerative Colitis | DLEU7-AS1  |
| GeneCards | Ulcerative Colitis | LEF1-AS1   |
| GeneCards | Ulcerative Colitis | MIR497     |
| GeneCards | Ulcerative Colitis | MIR542     |
| GeneCards | Ulcerative Colitis | MIR7-3     |
| GeneCards | Ulcerative Colitis | MIR95      |
| GeneCards | Ulcerative Colitis | SNORA54    |
| GeneCards | Ulcerative Colitis | SOX21-AS1  |
| GeneCards | Ulcerative Colitis | MIR372     |
| GeneCards | Ulcerative Colitis | MNX1-AS1   |
| GeneCards | Ulcerative Colitis | RNY1       |
| GeneCards | Ulcerative Colitis | VIM-AS1    |
| GeneCards | Ulcerative Colitis | CASC11     |
| GeneCards | Ulcerative Colitis | CASC19     |

|           |                    |              |
|-----------|--------------------|--------------|
| GeneCards | Ulcerative Colitis | CASC8        |
| GeneCards | Ulcerative Colitis | FOXP4-AS1    |
| GeneCards | Ulcerative Colitis | GABPB1-AS1   |
| GeneCards | Ulcerative Colitis | HIF1A-AS1    |
| GeneCards | Ulcerative Colitis | IQANK1       |
| GeneCards | Ulcerative Colitis | LINC00659    |
| GeneCards | Ulcerative Colitis | LINC01133    |
| GeneCards | Ulcerative Colitis | MACROD2-AS1  |
| GeneCards | Ulcerative Colitis | NNT-AS1      |
| GeneCards | Ulcerative Colitis | RNY3         |
| GeneCards | Ulcerative Colitis | DLGAP4-AS1   |
| GeneCards | Ulcerative Colitis | DPP10-AS1    |
| GeneCards | Ulcerative Colitis | LINC00858    |
| GeneCards | Ulcerative Colitis | MAMDC2-AS1   |
| GeneCards | Ulcerative Colitis | MIR625       |
| GeneCards | Ulcerative Colitis | POU5F1P4     |
| GeneCards | Ulcerative Colitis | SLC25A25-AS1 |
| GeneCards | Ulcerative Colitis | BACE1-AS     |
| GeneCards | Ulcerative Colitis | C10orf143    |
| GeneCards | Ulcerative Colitis | GSEC         |
| GeneCards | Ulcerative Colitis | HIPK1-AS1    |
| GeneCards | Ulcerative Colitis | LINC01507    |
| GeneCards | Ulcerative Colitis | LINC01567    |
| GeneCards | Ulcerative Colitis | SBDSP1       |
| GeneCards | Ulcerative Colitis | EHHADH-AS1   |
| GeneCards | Ulcerative Colitis | GPRC5D-AS1   |
| GeneCards | Ulcerative Colitis | LINC00538    |
| GeneCards | Ulcerative Colitis | LINC01527    |
| GeneCards | Ulcerative Colitis | LINC01618    |
| GeneCards | Ulcerative Colitis | LINC01630    |
| GeneCards | Ulcerative Colitis | MROCK1       |
| GeneCards | Ulcerative Colitis | PURPL        |
| GeneCards | Ulcerative Colitis | TUSC8        |
| GeneCards | Ulcerative Colitis | ZNF582-DT    |
| GeneCards | Ulcerative Colitis | AOC4P        |
| GeneCards | Ulcerative Colitis | CLMAT3       |
| GeneCards | Ulcerative Colitis | DUXAP10      |
| GeneCards | Ulcerative Colitis | LAMC1-AS1    |
| GeneCards | Ulcerative Colitis | LINC02223    |
| GeneCards | Ulcerative Colitis | LINC02446    |
| GeneCards | Ulcerative Colitis | PINCR        |
| GeneCards | Ulcerative Colitis | RBM5-AS1     |
| GeneCards | Ulcerative Colitis | WSPAR        |
| GeneCards | Ulcerative Colitis | BTG3-AS1     |

|           |                    |           |
|-----------|--------------------|-----------|
| GeneCards | Ulcerative Colitis | LINC02086 |
| GeneCards | Ulcerative Colitis | LINC01617 |
| GeneCards | Ulcerative Colitis | NIHCOLE   |
| GeneCards | Ulcerative Colitis | SEC63P1   |
| GeneCards | Ulcerative Colitis | DACOR1    |
| GeneCards | Ulcerative Colitis | FGF7P5    |
| GeneCards | Ulcerative Colitis | IBD19     |
| GeneCards | Ulcerative Colitis | PTPN6     |
| GeneCards | Ulcerative Colitis | SOD3      |
| GeneCards | Ulcerative Colitis | PTER      |
| GeneCards | Ulcerative Colitis | SECTM1    |
| GeneCards | Ulcerative Colitis | GAS6      |
| GeneCards | Ulcerative Colitis | PLAA      |
| GeneCards | Ulcerative Colitis | VPS35     |
| GeneCards | Ulcerative Colitis | CAPZB     |
| GeneCards | Ulcerative Colitis | PDZK1     |
| GeneCards | Ulcerative Colitis | ABCF2     |
| GeneCards | Ulcerative Colitis | MTSS1     |
| GeneCards | Ulcerative Colitis | SUV39H1   |
| GeneCards | Ulcerative Colitis | NKX2-1    |
| GeneCards | Ulcerative Colitis | MIR425    |
| GeneCards | Ulcerative Colitis | PEBP1     |
| GeneCards | Ulcerative Colitis | EDN3      |
| GeneCards | Ulcerative Colitis | MTM1      |
| GeneCards | Ulcerative Colitis | FAM126A   |
| GeneCards | Ulcerative Colitis | TTC7B     |
| GeneCards | Ulcerative Colitis | PI4KB     |
| GeneCards | Ulcerative Colitis | HCAR3     |
| GeneCards | Ulcerative Colitis | AHSG      |
| GeneCards | Ulcerative Colitis | GPC5      |
| GeneCards | Ulcerative Colitis | SLC2A14   |
| GeneCards | Ulcerative Colitis | C10orf67  |
| GeneCards | Ulcerative Colitis | CLCN5     |
| GeneCards | Ulcerative Colitis | FMR1      |
| GeneCards | Ulcerative Colitis | COPA      |
| GeneCards | Ulcerative Colitis | KIF21A    |
| GeneCards | Ulcerative Colitis | AKR1B1    |
| GeneCards | Ulcerative Colitis | MIR324    |
| GeneCards | Ulcerative Colitis | MIR490    |
| GeneCards | Ulcerative Colitis | ARNT      |
| GeneCards | Ulcerative Colitis | FBLIM1    |
| GeneCards | Ulcerative Colitis | PPP2R1A   |
| GeneCards | Ulcerative Colitis | ARSB      |
| GeneCards | Ulcerative Colitis | ADM       |

|           |                    |          |
|-----------|--------------------|----------|
| GeneCards | Ulcerative Colitis | C5       |
| GeneCards | Ulcerative Colitis | ENPP2    |
| GeneCards | Ulcerative Colitis | MIR650   |
| GeneCards | Ulcerative Colitis | CD99     |
| GeneCards | Ulcerative Colitis | TRPA1    |
| GeneCards | Ulcerative Colitis | CES1     |
| GeneCards | Ulcerative Colitis | DHX9     |
| GeneCards | Ulcerative Colitis | MIR590   |
| GeneCards | Ulcerative Colitis | CD207    |
| GeneCards | Ulcerative Colitis | SPRY2    |
| GeneCards | Ulcerative Colitis | IL17RE   |
| GeneCards | Ulcerative Colitis | ACE2     |
| GeneCards | Ulcerative Colitis | ABCC6    |
| GeneCards | Ulcerative Colitis | ACO1     |
| GeneCards | Ulcerative Colitis | TAB1     |
| GeneCards | Ulcerative Colitis | CD151    |
| GeneCards | Ulcerative Colitis | PHF6     |
| GeneCards | Ulcerative Colitis | DOCK6    |
| GeneCards | Ulcerative Colitis | SSTR5    |
| GeneCards | Ulcerative Colitis | AOC3     |
| GeneCards | Ulcerative Colitis | SLC15A4  |
| GeneCards | Ulcerative Colitis | TFPI2    |
| GeneCards | Ulcerative Colitis | AFF2     |
| GeneCards | Ulcerative Colitis | FADS1    |
| GeneCards | Ulcerative Colitis | PON2     |
| GeneCards | Ulcerative Colitis | PNPLA3   |
| GeneCards | Ulcerative Colitis | MGAT3    |
| GeneCards | Ulcerative Colitis | PRICKLE2 |
| GeneCards | Ulcerative Colitis | IPMK     |
| GeneCards | Ulcerative Colitis | ABCC4    |
| GeneCards | Ulcerative Colitis | RYR1     |
| GeneCards | Ulcerative Colitis | TTN      |
| GeneCards | Ulcerative Colitis | PIGA     |
| GeneCards | Ulcerative Colitis | CYP51A1  |
| GeneCards | Ulcerative Colitis | PPM1K    |
| GeneCards | Ulcerative Colitis | PPP2R2C  |
| GeneCards | Ulcerative Colitis | ASGR2    |
| GeneCards | Ulcerative Colitis | DPYSL5   |
| GeneCards | Ulcerative Colitis | PTMA     |
| GeneCards | Ulcerative Colitis | HOGA1    |
| GeneCards | Ulcerative Colitis | FCHO2    |
| GeneCards | Ulcerative Colitis | ISG20L2  |
| GeneCards | Ulcerative Colitis | MEPE     |
| GeneCards | Ulcerative Colitis | PSTPIP2  |



|           |                    |           |
|-----------|--------------------|-----------|
| GeneCards | Ulcerative Colitis | PSMB11    |
| GeneCards | Ulcerative Colitis | KAAG1     |
| GeneCards | Ulcerative Colitis | MT-TF     |
| GeneCards | Ulcerative Colitis | THM       |
| GeneCards | Ulcerative Colitis | TRIM58    |
| GeneCards | Ulcerative Colitis | SATB1     |
| GeneCards | Ulcerative Colitis | WT1       |
| GeneCards | Ulcerative Colitis | CUL3      |
| GeneCards | Ulcerative Colitis | SOAT1     |
| GeneCards | Ulcerative Colitis | ALPK1     |
| GeneCards | Ulcerative Colitis | RASGRF1   |
| GeneCards | Ulcerative Colitis | AXL       |
| GeneCards | Ulcerative Colitis | CHRNA7    |
| GeneCards | Ulcerative Colitis | AUTS2     |
| GeneCards | Ulcerative Colitis | PATZ1     |
| GeneCards | Ulcerative Colitis | GFRA1     |
| GeneCards | Ulcerative Colitis | NNMT      |
| GeneCards | Ulcerative Colitis | MIR374A   |
| GeneCards | Ulcerative Colitis | EPHB3     |
| GeneCards | Ulcerative Colitis | ZNF281    |
| GeneCards | Ulcerative Colitis | HDAC4     |
| GeneCards | Ulcerative Colitis | CACNA1C   |
| GeneCards | Ulcerative Colitis | VRK1      |
| GeneCards | Ulcerative Colitis | PGM1      |
| GeneCards | Ulcerative Colitis | EIF2AK2   |
| GeneCards | Ulcerative Colitis | ATP2B2    |
| GeneCards | Ulcerative Colitis | CTSZ      |
| GeneCards | Ulcerative Colitis | RPS6KA2   |
| GeneCards | Ulcerative Colitis | CSF2RA    |
| GeneCards | Ulcerative Colitis | PLTP      |
| GeneCards | Ulcerative Colitis | IL31RA    |
| GeneCards | Ulcerative Colitis | LAMA5     |
| GeneCards | Ulcerative Colitis | SPHK2     |
| GeneCards | Ulcerative Colitis | PADI2     |
| GeneCards | Ulcerative Colitis | TNFRSF12A |
| GeneCards | Ulcerative Colitis | NLRP2     |
| GeneCards | Ulcerative Colitis | NOX3      |
| GeneCards | Ulcerative Colitis | SPRED1    |
| GeneCards | Ulcerative Colitis | SULF2     |
| GeneCards | Ulcerative Colitis | MPG       |
| GeneCards | Ulcerative Colitis | ST8SIA4   |
| GeneCards | Ulcerative Colitis | CREB5     |
| GeneCards | Ulcerative Colitis | EPS8L2    |
| GeneCards | Ulcerative Colitis | FLRT1     |

|           |                    |             |
|-----------|--------------------|-------------|
| GeneCards | Ulcerative Colitis | RSPO3       |
| GeneCards | Ulcerative Colitis | SYT4        |
| GeneCards | Ulcerative Colitis | UBQLN4      |
| GeneCards | Ulcerative Colitis | CSMD2       |
| GeneCards | Ulcerative Colitis | DBP         |
| GeneCards | Ulcerative Colitis | RAB13       |
| GeneCards | Ulcerative Colitis | TUBD1       |
| GeneCards | Ulcerative Colitis | ADAM30      |
| GeneCards | Ulcerative Colitis | GBGT1       |
| GeneCards | Ulcerative Colitis | MPPED2      |
| GeneCards | Ulcerative Colitis | PF4V1       |
| GeneCards | Ulcerative Colitis | SNX7        |
| GeneCards | Ulcerative Colitis | STXBP4      |
| GeneCards | Ulcerative Colitis | TMTC2       |
| GeneCards | Ulcerative Colitis | CEBPG       |
| GeneCards | Ulcerative Colitis | SLAIN2      |
| GeneCards | Ulcerative Colitis | SLC10A4     |
| GeneCards | Ulcerative Colitis | SLC39A12    |
| GeneCards | Ulcerative Colitis | IZUMO1      |
| GeneCards | Ulcerative Colitis | OR2AT4      |
| GeneCards | Ulcerative Colitis | PHACTR2     |
| GeneCards | Ulcerative Colitis | ZNF532      |
| GeneCards | Ulcerative Colitis | GALNTL6     |
| GeneCards | Ulcerative Colitis | RABEP2      |
| GeneCards | Ulcerative Colitis | ZNF432      |
| GeneCards | Ulcerative Colitis | TRPT1       |
| GeneCards | Ulcerative Colitis | MORC4       |
| GeneCards | Ulcerative Colitis | PRRC1       |
| GeneCards | Ulcerative Colitis | RIMBP3      |
| GeneCards | Ulcerative Colitis | C1orf53     |
| GeneCards | Ulcerative Colitis | LRRC61      |
| GeneCards | Ulcerative Colitis | C2orf74     |
| GeneCards | Ulcerative Colitis | TM6SF2      |
| GeneCards | Ulcerative Colitis | BORCS5      |
| GeneCards | Ulcerative Colitis | CIBAR2      |
| GeneCards | Ulcerative Colitis | PPAN-P2RY11 |
| GeneCards | Ulcerative Colitis | MIR19B1     |
| GeneCards | Ulcerative Colitis | ZNF300P1    |
| GeneCards | Ulcerative Colitis | OR2AT1P     |
| GeneCards | Ulcerative Colitis | OR7E116P    |
| GeneCards | Ulcerative Colitis | MIR6727     |
| GeneCards | Ulcerative Colitis | RPL35AP7    |
| GeneCards | Ulcerative Colitis | RNU7-67P    |
| GeneCards | Ulcerative Colitis | RPL21P108   |

|           |                    |          |
|-----------|--------------------|----------|
| GeneCards | Ulcerative Colitis | RPL18P7  |
| GeneCards | Ulcerative Colitis | GALK1    |
| GeneCards | Ulcerative Colitis | MARS1    |
| GeneCards | Ulcerative Colitis | IGF2BP1  |
| GeneCards | Ulcerative Colitis | LAMP3    |
| GeneCards | Ulcerative Colitis | PLA2G1B  |
| GeneCards | Ulcerative Colitis | EDNRB    |
| GeneCards | Ulcerative Colitis | GLP1R    |
| GeneCards | Ulcerative Colitis | GKN1     |
| GeneCards | Ulcerative Colitis | CYP11B1  |
| GeneCards | Ulcerative Colitis | AMPD2    |
| GeneCards | Ulcerative Colitis | AMPD3    |
| GeneCards | Ulcerative Colitis | IGSF3    |
| GeneCards | Ulcerative Colitis | NFAM1    |
| GeneCards | Ulcerative Colitis | H2BC3    |
| GeneCards | Ulcerative Colitis | CASP6    |
| GeneCards | Ulcerative Colitis | CDH11    |
| GeneCards | Ulcerative Colitis | GRN      |
| GeneCards | Ulcerative Colitis | TRD      |
| GeneCards | Ulcerative Colitis | ACTG1    |
| GeneCards | Ulcerative Colitis | MECOM    |
| GeneCards | Ulcerative Colitis | GTF2H1   |
| GeneCards | Ulcerative Colitis | KEL      |
| GeneCards | Ulcerative Colitis | IQGAP2   |
| GeneCards | Ulcerative Colitis | ASPH     |
| GeneCards | Ulcerative Colitis | MSLN     |
| GeneCards | Ulcerative Colitis | PLA2R1   |
| GeneCards | Ulcerative Colitis | DHX8     |
| GeneCards | Ulcerative Colitis | KIAA1217 |
| GeneCards | Ulcerative Colitis | PPFIBP2  |
| GeneCards | Ulcerative Colitis | THSD7A   |
| GeneCards | Ulcerative Colitis | TCFL5    |
| GeneCards | Ulcerative Colitis | MIR412   |
| GeneCards | Ulcerative Colitis | MIR541   |
| GeneCards | Ulcerative Colitis | MIR4729  |
| GeneCards | Ulcerative Colitis | IQGAP1   |
| GeneCards | Ulcerative Colitis | GPR15    |
| GeneCards | Ulcerative Colitis | DYRK1A   |
| GeneCards | Ulcerative Colitis | SMARCD3  |
| GeneCards | Ulcerative Colitis | ITGA3    |
| GeneCards | Ulcerative Colitis | OMP      |
| GeneCards | Ulcerative Colitis | CRYAB    |
| GeneCards | Ulcerative Colitis | CD101    |
| GeneCards | Ulcerative Colitis | ADAM10   |

|           |                    |         |
|-----------|--------------------|---------|
| GeneCards | Ulcerative Colitis | ADAM9   |
| GeneCards | Ulcerative Colitis | PGK1    |
| GeneCards | Ulcerative Colitis | CPT1A   |
| GeneCards | Ulcerative Colitis | PRLR    |
| GeneCards | Ulcerative Colitis | ARHGDIA |
| GeneCards | Ulcerative Colitis | GALNT2  |
| GeneCards | Ulcerative Colitis | NR1H3   |
| GeneCards | Ulcerative Colitis | OTC     |
| GeneCards | Ulcerative Colitis | AKR1C2  |
| GeneCards | Ulcerative Colitis | CYP26B1 |
| GeneCards | Ulcerative Colitis | FPR2    |
| GeneCards | Ulcerative Colitis | GRM8    |
| GeneCards | Ulcerative Colitis | MTNR1B  |
| GeneCards | Ulcerative Colitis | CBR1    |
| GeneCards | Ulcerative Colitis | MGLL    |
| GeneCards | Ulcerative Colitis | ADAM19  |
| GeneCards | Ulcerative Colitis | ANXA4   |
| GeneCards | Ulcerative Colitis | HNF4G   |
| GeneCards | Ulcerative Colitis | PANX1   |
| GeneCards | Ulcerative Colitis | TPP1    |
| GeneCards | Ulcerative Colitis | AKR1C1  |
| GeneCards | Ulcerative Colitis | GSTA1   |
| GeneCards | Ulcerative Colitis | HES1    |
| GeneCards | Ulcerative Colitis | MTNR1A  |
| GeneCards | Ulcerative Colitis | SLC23A1 |
| GeneCards | Ulcerative Colitis | CLDN11  |
| GeneCards | Ulcerative Colitis | FGL2    |
| GeneCards | Ulcerative Colitis | FLOT2   |
| GeneCards | Ulcerative Colitis | GSTA2   |
| GeneCards | Ulcerative Colitis | JUNB    |
| GeneCards | Ulcerative Colitis | PPP2R5E |
| GeneCards | Ulcerative Colitis | TAGLN2  |
| GeneCards | Ulcerative Colitis | SULT1B1 |
| GeneCards | Ulcerative Colitis | FN3K    |
| GeneCards | Ulcerative Colitis | GSTK1   |
| GeneCards | Ulcerative Colitis | HNRNPH3 |
| GeneCards | Ulcerative Colitis | HSPB2   |
| GeneCards | Ulcerative Colitis | LSAMP   |
| GeneCards | Ulcerative Colitis | PANX2   |
| GeneCards | Ulcerative Colitis | PSG1    |
| GeneCards | Ulcerative Colitis | ALDOC   |
| GeneCards | Ulcerative Colitis | CLEC2D  |
| GeneCards | Ulcerative Colitis | CLEC4A  |
| GeneCards | Ulcerative Colitis | FIS1    |

|           |                    |           |
|-----------|--------------------|-----------|
| GeneCards | Ulcerative Colitis | IBSP      |
| GeneCards | Ulcerative Colitis | RNF20     |
| GeneCards | Ulcerative Colitis | USO1      |
| GeneCards | Ulcerative Colitis | C1QTNF3   |
| GeneCards | Ulcerative Colitis | CNN3      |
| GeneCards | Ulcerative Colitis | NOXO1     |
| GeneCards | Ulcerative Colitis | PIH1D1    |
| GeneCards | Ulcerative Colitis | PPP3R2    |
| GeneCards | Ulcerative Colitis | BEST2     |
| GeneCards | Ulcerative Colitis | DNPB1     |
| GeneCards | Ulcerative Colitis | MAGI3     |
| GeneCards | Ulcerative Colitis | METRNL    |
| GeneCards | Ulcerative Colitis | ACTL8     |
| GeneCards | Ulcerative Colitis | BEST4     |
| GeneCards | Ulcerative Colitis | DNAH12    |
| GeneCards | Ulcerative Colitis | ZG16      |
| GeneCards | Ulcerative Colitis | ZNF649    |
| GeneCards | Ulcerative Colitis | ENHO      |
| GeneCards | Ulcerative Colitis | PROSER1   |
| GeneCards | Ulcerative Colitis | TMEM229B  |
| GeneCards | Ulcerative Colitis | MIR595    |
| GeneCards | Ulcerative Colitis | MIR1246   |
| GeneCards | Ulcerative Colitis | LOC400867 |
| GeneCards | Ulcerative Colitis | IL6STP1   |
| GeneCards | Ulcerative Colitis | NM        |
| GeneCards | Ulcerative Colitis | YWHAB     |
| GeneCards | Ulcerative Colitis | RNF31     |
| GeneCards | Ulcerative Colitis | SHARPIN   |
| GeneCards | Ulcerative Colitis | MYLK      |
| GeneCards | Ulcerative Colitis | GLUL      |
| GeneCards | Ulcerative Colitis | B3GAT1    |
| GeneCards | Ulcerative Colitis | TRIM5     |
| GeneCards | Ulcerative Colitis | CDB2      |
| GeneCards | Ulcerative Colitis | AQP3      |
| GeneCards | Ulcerative Colitis | TUBA1A    |
| GeneCards | Ulcerative Colitis | EEF1A1    |
| GeneCards | Ulcerative Colitis | MAP3K1    |
| GeneCards | Ulcerative Colitis | PON3      |
| GeneCards | Ulcerative Colitis | ICA1      |
| GeneCards | Ulcerative Colitis | PAX3      |
| GeneCards | Ulcerative Colitis | KLK7      |
| GeneCards | Ulcerative Colitis | VCAN      |
| GeneCards | Ulcerative Colitis | PDLIM1    |
| GeneCards | Ulcerative Colitis | CRTC1     |

|           |                    |         |
|-----------|--------------------|---------|
| GeneCards | Ulcerative Colitis | CEMIP   |
| GeneCards | Ulcerative Colitis | TTF2    |
| GeneCards | Ulcerative Colitis | P2RY6   |
| GeneCards | Ulcerative Colitis | AQP10   |
| GeneCards | Ulcerative Colitis | RGS4    |
| GeneCards | Ulcerative Colitis | STK38   |
| GeneCards | Ulcerative Colitis | SOCS5   |
| GeneCards | Ulcerative Colitis | MIR802  |
| GeneCards | Ulcerative Colitis | SREBF2  |
| GeneCards | Ulcerative Colitis | TRAF4   |
| GeneCards | Ulcerative Colitis | EPAS1   |
| GeneCards | Ulcerative Colitis | TRNT1   |
| GeneCards | Ulcerative Colitis | KMT2A   |
| GeneCards | Ulcerative Colitis | RHBDF2  |
| GeneCards | Ulcerative Colitis | CHD3    |
| GeneCards | Ulcerative Colitis | MBD3    |
| GeneCards | Ulcerative Colitis | CD247   |
| GeneCards | Ulcerative Colitis | ABCB7   |
| GeneCards | Ulcerative Colitis | ATF1    |
| GeneCards | Ulcerative Colitis | RGN     |
| GeneCards | Ulcerative Colitis | GRAP2   |
| GeneCards | Ulcerative Colitis | RPS6KA3 |
| GeneCards | Ulcerative Colitis | NTRK3   |
| GeneCards | Ulcerative Colitis | RYR2    |
| GeneCards | Ulcerative Colitis | SLC29A1 |
| GeneCards | Ulcerative Colitis | DLG1    |
| GeneCards | Ulcerative Colitis | LTC4S   |
| GeneCards | Ulcerative Colitis | SBF1    |
| GeneCards | Ulcerative Colitis | SLCO4A1 |
| GeneCards | Ulcerative Colitis | KCNIP4  |
| GeneCards | Ulcerative Colitis | DRAM1   |
| GeneCards | Ulcerative Colitis | CCNE1   |
| GeneCards | Ulcerative Colitis | WEE1    |
| GeneCards | Ulcerative Colitis | CACNA1I |
| GeneCards | Ulcerative Colitis | NCR1    |
| GeneCards | Ulcerative Colitis | UBR5    |
| GeneCards | Ulcerative Colitis | PPM1D   |
| GeneCards | Ulcerative Colitis | TSPO    |
| GeneCards | Ulcerative Colitis | TRAF5   |
| GeneCards | Ulcerative Colitis | LPO     |
| GeneCards | Ulcerative Colitis | MIR19B2 |
| GeneCards | Ulcerative Colitis | LCP2    |
| GeneCards | Ulcerative Colitis | PROK2   |
| GeneCards | Ulcerative Colitis | RNF183  |

|           |                    |         |
|-----------|--------------------|---------|
| GeneCards | Ulcerative Colitis | CDH5    |
| GeneCards | Ulcerative Colitis | NAA15   |
| GeneCards | Ulcerative Colitis | SIRT2   |
| GeneCards | Ulcerative Colitis | KLRB1   |
| GeneCards | Ulcerative Colitis | ZNF133  |
| GeneCards | Ulcerative Colitis | CCDC80  |
| GeneCards | Ulcerative Colitis | OTUD1   |
| GeneCards | Ulcerative Colitis | FUT7    |
| GeneCards | Ulcerative Colitis | PNOC    |
| GeneCards | Ulcerative Colitis | LIMK2   |
| GeneCards | Ulcerative Colitis | PARP2   |
| GeneCards | Ulcerative Colitis | ACTR2   |
| GeneCards | Ulcerative Colitis | MTA3    |
| GeneCards | Ulcerative Colitis | SYNPO   |
| GeneCards | Ulcerative Colitis | H3C1    |
| GeneCards | Ulcerative Colitis | KAT2B   |
| GeneCards | Ulcerative Colitis | ROCK2   |
| GeneCards | Ulcerative Colitis | LTB4R   |
| GeneCards | Ulcerative Colitis | MIP     |
| GeneCards | Ulcerative Colitis | ANGPTL2 |
| GeneCards | Ulcerative Colitis | PCSK1   |
| GeneCards | Ulcerative Colitis | TNFSF13 |
| GeneCards | Ulcerative Colitis | PSME3   |
| GeneCards | Ulcerative Colitis | CD177   |
| GeneCards | Ulcerative Colitis | CLEC4D  |
| GeneCards | Ulcerative Colitis | SLC1A1  |
| GeneCards | Ulcerative Colitis | CNTN3   |
| GeneCards | Ulcerative Colitis | SLC16A9 |
| GeneCards | Ulcerative Colitis | AVIL    |
| GeneCards | Ulcerative Colitis | UBE2H   |
| GeneCards | Ulcerative Colitis | NTF4    |
| GeneCards | Ulcerative Colitis | TPM3    |
| GeneCards | Ulcerative Colitis | P2RY2   |
| GeneCards | Ulcerative Colitis | FUT8    |
| GeneCards | Ulcerative Colitis | MNAT1   |
| GeneCards | Ulcerative Colitis | MPST    |
| GeneCards | Ulcerative Colitis | BRWD1   |
| GeneCards | Ulcerative Colitis | CCDC22  |
| GeneCards | Ulcerative Colitis | TIGAR   |
| GeneCards | Ulcerative Colitis | FCGBP   |
| GeneCards | Ulcerative Colitis | WASHC2C |
| GeneCards | Ulcerative Colitis | EGLN3   |
| GeneCards | Ulcerative Colitis | GUCY2D  |
| GeneCards | Ulcerative Colitis | MDM4    |

|           |                    |           |
|-----------|--------------------|-----------|
| GeneCards | Ulcerative Colitis | MYL9      |
| GeneCards | Ulcerative Colitis | MIR22HG   |
| GeneCards | Ulcerative Colitis | EIF2B4    |
| GeneCards | Ulcerative Colitis | CLSPN     |
| GeneCards | Ulcerative Colitis | MCM3      |
| GeneCards | Ulcerative Colitis | PTPRT     |
| GeneCards | Ulcerative Colitis | FSTL1     |
| GeneCards | Ulcerative Colitis | UBD       |
| GeneCards | Ulcerative Colitis | ACAT1     |
| GeneCards | Ulcerative Colitis | BMPR2     |
| GeneCards | Ulcerative Colitis | PRKG1     |
| GeneCards | Ulcerative Colitis | PLD1      |
| GeneCards | Ulcerative Colitis | CACNA1E   |
| GeneCards | Ulcerative Colitis | ENPEP     |
| GeneCards | Ulcerative Colitis | GRM3      |
| GeneCards | Ulcerative Colitis | ITGB5     |
| GeneCards | Ulcerative Colitis | B4GALT1   |
| GeneCards | Ulcerative Colitis | CNTN1     |
| GeneCards | Ulcerative Colitis | DPP6      |
| GeneCards | Ulcerative Colitis | INHBA     |
| GeneCards | Ulcerative Colitis | PSMA7     |
| GeneCards | Ulcerative Colitis | PTGFR     |
| GeneCards | Ulcerative Colitis | RPSA      |
| GeneCards | Ulcerative Colitis | SLC29A2   |
| GeneCards | Ulcerative Colitis | TNFRSF11A |
| GeneCards | Ulcerative Colitis | CHD2      |
| GeneCards | Ulcerative Colitis | CTRC      |
| GeneCards | Ulcerative Colitis | KCNN3     |
| GeneCards | Ulcerative Colitis | AKR1B10   |
| GeneCards | Ulcerative Colitis | CPD       |
| GeneCards | Ulcerative Colitis | FABP1     |
| GeneCards | Ulcerative Colitis | ITGA11    |
| GeneCards | Ulcerative Colitis | MAP3K14   |
| GeneCards | Ulcerative Colitis | PEX5      |
| GeneCards | Ulcerative Colitis | ROBO2     |
| GeneCards | Ulcerative Colitis | SLC8A3    |
| GeneCards | Ulcerative Colitis | SLCO2B1   |
| GeneCards | Ulcerative Colitis | TSFM      |
| GeneCards | Ulcerative Colitis | CACNB1    |
| GeneCards | Ulcerative Colitis | CADPS     |
| GeneCards | Ulcerative Colitis | CALU      |
| GeneCards | Ulcerative Colitis | CAPZA1    |
| GeneCards | Ulcerative Colitis | CYFIP2    |
| GeneCards | Ulcerative Colitis | FABP5     |



|           |                    |          |
|-----------|--------------------|----------|
| GeneCards | Ulcerative Colitis | GPM6A    |
| GeneCards | Ulcerative Colitis | LRP1B    |
| GeneCards | Ulcerative Colitis | MEGF10   |
| GeneCards | Ulcerative Colitis | NRG3     |
| GeneCards | Ulcerative Colitis | PRRX1    |
| GeneCards | Ulcerative Colitis | SEPHS1   |
| GeneCards | Ulcerative Colitis | SLC28A2  |
| GeneCards | Ulcerative Colitis | SMYD2    |
| GeneCards | Ulcerative Colitis | STAB2    |
| GeneCards | Ulcerative Colitis | TIRAP    |
| GeneCards | Ulcerative Colitis | UBB      |
| GeneCards | Ulcerative Colitis | VAPA     |
| GeneCards | Ulcerative Colitis | VAV2     |
| GeneCards | Ulcerative Colitis | ARID5B   |
| GeneCards | Ulcerative Colitis | IGF2BP3  |
| GeneCards | Ulcerative Colitis | NSMAF    |
| GeneCards | Ulcerative Colitis | PDSS2    |
| GeneCards | Ulcerative Colitis | SORBS1   |
| GeneCards | Ulcerative Colitis | SOX13    |
| GeneCards | Ulcerative Colitis | ALDH1L2  |
| GeneCards | Ulcerative Colitis | CNN1     |
| GeneCards | Ulcerative Colitis | DNER     |
| GeneCards | Ulcerative Colitis | ELMO1    |
| GeneCards | Ulcerative Colitis | LY75     |
| GeneCards | Ulcerative Colitis | ZNF423   |
| GeneCards | Ulcerative Colitis | ABCB9    |
| GeneCards | Ulcerative Colitis | ARHGAP24 |
| GeneCards | Ulcerative Colitis | CD200R1  |
| GeneCards | Ulcerative Colitis | CDK18    |
| GeneCards | Ulcerative Colitis | COL19A1  |
| GeneCards | Ulcerative Colitis | CSMD1    |
| GeneCards | Ulcerative Colitis | ELL2     |
| GeneCards | Ulcerative Colitis | EPB41L2  |
| GeneCards | Ulcerative Colitis | HNRNPM   |
| GeneCards | Ulcerative Colitis | LRRC4C   |
| GeneCards | Ulcerative Colitis | NCR2     |
| GeneCards | Ulcerative Colitis | PARVB    |
| GeneCards | Ulcerative Colitis | PIK3AP1  |
| GeneCards | Ulcerative Colitis | PLCH1    |
| GeneCards | Ulcerative Colitis | POU6F2   |
| GeneCards | Ulcerative Colitis | PTPRR    |
| GeneCards | Ulcerative Colitis | TNFRSF19 |
| GeneCards | Ulcerative Colitis | USH2A    |
| GeneCards | Ulcerative Colitis | VPS26A   |

|           |                    |          |
|-----------|--------------------|----------|
| GeneCards | Ulcerative Colitis | ABI3     |
| GeneCards | Ulcerative Colitis | ANO2     |
| GeneCards | Ulcerative Colitis | CRISP3   |
| GeneCards | Ulcerative Colitis | DNAH10   |
| GeneCards | Ulcerative Colitis | GPR158   |
| GeneCards | Ulcerative Colitis | LRRTM4   |
| GeneCards | Ulcerative Colitis | MDGA2    |
| GeneCards | Ulcerative Colitis | MPRIP    |
| GeneCards | Ulcerative Colitis | RALGAPA2 |
| GeneCards | Ulcerative Colitis | SCUBE1   |
| GeneCards | Ulcerative Colitis | SMYD1    |
| GeneCards | Ulcerative Colitis | SNRPC    |
| GeneCards | Ulcerative Colitis | TAF3     |
| GeneCards | Ulcerative Colitis | UNC45A   |
| GeneCards | Ulcerative Colitis | ADAMDEC1 |
| GeneCards | Ulcerative Colitis | CCDC40   |
| GeneCards | Ulcerative Colitis | CCNG2    |
| GeneCards | Ulcerative Colitis | EYS      |
| GeneCards | Ulcerative Colitis | HOXD3    |
| GeneCards | Ulcerative Colitis | HUNK     |
| GeneCards | Ulcerative Colitis | JAKMIP1  |
| GeneCards | Ulcerative Colitis | LINGO2   |
| GeneCards | Ulcerative Colitis | MRPL28   |
| GeneCards | Ulcerative Colitis | RAB3C    |
| GeneCards | Ulcerative Colitis | RBM26    |
| GeneCards | Ulcerative Colitis | TMEM132D |
| GeneCards | Ulcerative Colitis | WARS1    |
| GeneCards | Ulcerative Colitis | CPNE8    |
| GeneCards | Ulcerative Colitis | GDE1     |
| GeneCards | Ulcerative Colitis | HCST     |
| GeneCards | Ulcerative Colitis | MEF2B    |
| GeneCards | Ulcerative Colitis | PLD5     |
| GeneCards | Ulcerative Colitis | RTCB     |
| GeneCards | Ulcerative Colitis | SYTL1    |
| GeneCards | Ulcerative Colitis | TRIM6    |
| GeneCards | Ulcerative Colitis | CEACAM4  |
| GeneCards | Ulcerative Colitis | CNTNAP5  |
| GeneCards | Ulcerative Colitis | DERL3    |
| GeneCards | Ulcerative Colitis | FRY      |
| GeneCards | Ulcerative Colitis | IL31     |
| GeneCards | Ulcerative Colitis | JPH4     |
| GeneCards | Ulcerative Colitis | SGCZ     |
| GeneCards | Ulcerative Colitis | SHISA6   |
| GeneCards | Ulcerative Colitis | SYT9     |

|           |                    |              |
|-----------|--------------------|--------------|
| GeneCards | Ulcerative Colitis | TBC1D14      |
| GeneCards | Ulcerative Colitis | UMODL1       |
| GeneCards | Ulcerative Colitis | ARMC3        |
| GeneCards | Ulcerative Colitis | BEND7        |
| GeneCards | Ulcerative Colitis | CCDC93       |
| GeneCards | Ulcerative Colitis | CEP131       |
| GeneCards | Ulcerative Colitis | KMT5B        |
| GeneCards | Ulcerative Colitis | SAMD14       |
| GeneCards | Ulcerative Colitis | SLC38A10     |
| GeneCards | Ulcerative Colitis | SNTG1        |
| GeneCards | Ulcerative Colitis | UBE2U        |
| GeneCards | Ulcerative Colitis | VPS13C       |
| GeneCards | Ulcerative Colitis | DNASE2B      |
| GeneCards | Ulcerative Colitis | EFCAB6       |
| GeneCards | Ulcerative Colitis | MON2         |
| GeneCards | Ulcerative Colitis | OBP2A        |
| GeneCards | Ulcerative Colitis | TMEM182      |
| GeneCards | Ulcerative Colitis | ZNF385D      |
| GeneCards | Ulcerative Colitis | ZNF804B      |
| GeneCards | Ulcerative Colitis | CEP170B      |
| GeneCards | Ulcerative Colitis | RELL1        |
| GeneCards | Ulcerative Colitis | TTL2         |
| GeneCards | Ulcerative Colitis | TMEM255B     |
| GeneCards | Ulcerative Colitis | TOPAZ1       |
| GeneCards | Ulcerative Colitis | EMC9         |
| GeneCards | Ulcerative Colitis | REC114       |
| GeneCards | Ulcerative Colitis | TENT2        |
| GeneCards | Ulcerative Colitis | DEFB103A     |
| GeneCards | Ulcerative Colitis | TRIM6-TRIM34 |
| GeneCards | Ulcerative Colitis | CFAP92       |
| GeneCards | Ulcerative Colitis | NPSR1-AS1    |
| GeneCards | Ulcerative Colitis | CLRN1-AS1    |
| GeneCards | Ulcerative Colitis | LINC00469    |
| GeneCards | Ulcerative Colitis | SNORD48      |
| GeneCards | Ulcerative Colitis | LINC00649    |
| GeneCards | Ulcerative Colitis | ANKRD34C-AS1 |
| GeneCards | Ulcerative Colitis | PRICKLE2-AS3 |
| GeneCards | Ulcerative Colitis | C13orf42     |
| GeneCards | Ulcerative Colitis | LACTB2-AS1   |
| GeneCards | Ulcerative Colitis | LINC00331    |
| GeneCards | Ulcerative Colitis | LOC101929710 |
| GeneCards | Ulcerative Colitis | SYT9-AS1     |
| GeneCards | Ulcerative Colitis | ZNF815P      |
| GeneCards | Ulcerative Colitis | FILNC1       |

|           |                    |              |
|-----------|--------------------|--------------|
| GeneCards | Ulcerative Colitis | LINC00836    |
| GeneCards | Ulcerative Colitis | LINC01342    |
| GeneCards | Ulcerative Colitis | LINC02367    |
| GeneCards | Ulcerative Colitis | NIPAL4-DT    |
| GeneCards | Ulcerative Colitis | IATPR        |
| GeneCards | Ulcerative Colitis | MIR499B      |
| GeneCards | Ulcerative Colitis | ISCA2P1      |
| GeneCards | Ulcerative Colitis | LRRTM4-AS1   |
| GeneCards | Ulcerative Colitis | PPIAP33      |
| GeneCards | Ulcerative Colitis | LOC101927484 |
| GeneCards | Ulcerative Colitis | IDDM15       |
| OMIM      | Ulcerative Colitis | IBD1         |
| OMIM      | Ulcerative Colitis | IBD31        |
| OMIM      | Ulcerative Colitis | IBD3         |
| OMIM      | Ulcerative Colitis | IL23R        |
| OMIM      | Ulcerative Colitis | IBD17        |
| OMIM      | Ulcerative Colitis | IBD12        |
| OMIM      | Ulcerative Colitis | NOD2         |
| OMIM      | Ulcerative Colitis | NFKB1        |
| OMIM      | Ulcerative Colitis | IBD2         |
| OMIM      | Ulcerative Colitis | CLEC7A       |
| OMIM      | Ulcerative Colitis | IBD20        |
| OMIM      | Ulcerative Colitis | IBD23        |
| OMIM      | Ulcerative Colitis | NFKBIZ       |
| OMIM      | Ulcerative Colitis | IBD7         |
| OMIM      | Ulcerative Colitis | IBD19        |
| OMIM      | Ulcerative Colitis | IBD5         |
| OMIM      | Ulcerative Colitis | IBD11        |
| OMIM      | Ulcerative Colitis | IBD15        |
| OMIM      | Ulcerative Colitis | IBD22        |
| OMIM      | Ulcerative Colitis | IBD25        |
| OMIM      | Ulcerative Colitis | IBD21        |
| OMIM      | Ulcerative Colitis | MUC2         |
| OMIM      | Ulcerative Colitis | BCNS         |
| OMIM      | Ulcerative Colitis | IBD8         |
| OMIM      | Ulcerative Colitis | IBD18        |
| OMIM      | Ulcerative Colitis | IBD26        |
| OMIM      | Ulcerative Colitis | PLA2G2A      |
| OMIM      | Ulcerative Colitis | ABCB1        |
| OMIM      | Ulcerative Colitis | IBD13        |
| OMIM      | Ulcerative Colitis | CLCN5        |
| OMIM      | Ulcerative Colitis | IBD29        |
| OMIM      | Ulcerative Colitis | IL22         |
| OMIM      | Ulcerative Colitis | IBD10        |

|      |                    |          |
|------|--------------------|----------|
| OMIM | Ulcerative Colitis | IBD24    |
| OMIM | Ulcerative Colitis | IL37     |
| OMIM | Ulcerative Colitis | SIRT1    |
| OMIM | Ulcerative Colitis | IL18R1   |
| OMIM | Ulcerative Colitis | STAT6    |
| OMIM | Ulcerative Colitis | CYGB     |
| OMIM | Ulcerative Colitis | IL12B    |
| OMIM | Ulcerative Colitis | GNAI2    |
| OMIM | Ulcerative Colitis | INAVA    |
| OMIM | Ulcerative Colitis | FDH      |
| OMIM | Ulcerative Colitis | APLAID   |
| OMIM | Ulcerative Colitis | IBD6     |
| OMIM | Ulcerative Colitis | IBD9     |
| OMIM | Ulcerative Colitis | IBD16    |
| OMIM | Ulcerative Colitis | IBD27    |
| OMIM | Ulcerative Colitis | CELIAC8  |
| OMIM | Ulcerative Colitis | TNFSF14  |
| OMIM | Ulcerative Colitis | IRF5     |
| OMIM | Ulcerative Colitis | IRGM     |
| OMIM | Ulcerative Colitis | IL17REL  |
| OMIM | Ulcerative Colitis | FCGR2A   |
| OMIM | Ulcerative Colitis | IL1RN    |
| OMIM | Ulcerative Colitis | TNFRSF1B |
| OMIM | Ulcerative Colitis | STAT4    |
| OMIM | Ulcerative Colitis | SMAD4    |
| OMIM | Ulcerative Colitis | PTCH1    |
| OMIM | Ulcerative Colitis | CGD5     |
| OMIM | Ulcerative Colitis | HPS1     |
| OMIM | Ulcerative Colitis | IL18     |
| OMIM | Ulcerative Colitis | PDR      |
| OMIM | Ulcerative Colitis | IMD60    |
| OMIM | Ulcerative Colitis | ITGAV    |
| OMIM | Ulcerative Colitis | ATG16L1  |
| OMIM | Ulcerative Colitis | TNF      |
| OMIM | Ulcerative Colitis | IBD28    |
| OMIM | Ulcerative Colitis | CRC      |
| OMIM | Ulcerative Colitis | DBA19    |
| OMIM | Ulcerative Colitis | IL10RB   |
| OMIM | Ulcerative Colitis | NOD1     |
| OMIM | Ulcerative Colitis | CARD9    |
| OMIM | Ulcerative Colitis | SPDA1    |
| OMIM | Ulcerative Colitis | LAN      |
| OMIM | Ulcerative Colitis | WAS      |
| OMIM | Ulcerative Colitis | CMT4C    |

|      |                    |         |
|------|--------------------|---------|
| OMIM | Ulcerative Colitis | IBD14   |
| OMIM | Ulcerative Colitis | AIS6    |
| OMIM | Ulcerative Colitis | SCAR16  |
| OMIM | Ulcerative Colitis | FMD2    |
| OMIM | Ulcerative Colitis | IMD11B  |
| OMIM | Ulcerative Colitis | IBD30   |
| OMIM | Ulcerative Colitis | T1D     |
| OMIM | Ulcerative Colitis | IBD4    |
| OMIM | Ulcerative Colitis | TWIST1  |
| OMIM | Ulcerative Colitis | DEFB4A  |
| OMIM | Ulcerative Colitis | CCL28   |
| OMIM | Ulcerative Colitis | MUC3B   |
| OMIM | Ulcerative Colitis | SLC22A5 |
| OMIM | Ulcerative Colitis | TNFSF15 |
| OMIM | Ulcerative Colitis | IL18RAP |
| OMIM | Ulcerative Colitis | IFIH1   |
| OMIM | Ulcerative Colitis | EPN3    |
| OMIM | Ulcerative Colitis | SH3TC2  |
| OMIM | Ulcerative Colitis | MUC17   |
| OMIM | Ulcerative Colitis | NDUFA13 |
| OMIM | Ulcerative Colitis | CDH1    |
| OMIM | Ulcerative Colitis | SMAD7   |
| OMIM | Ulcerative Colitis | MUC12   |
| OMIM | Ulcerative Colitis | MUC13   |
| OMIM | Ulcerative Colitis | MUC1    |
| OMIM | Ulcerative Colitis | MUC3A   |
| OMIM | Ulcerative Colitis | MUC5AC  |
| OMIM | Ulcerative Colitis | REG1A   |
| OMIM | Ulcerative Colitis | MUC5B   |
| OMIM | Ulcerative Colitis | REG4    |
| OMIM | Ulcerative Colitis | ORMDL3  |
| OMIM | Ulcerative Colitis | SIAE    |
| OMIM | Ulcerative Colitis | MUC20   |
| OMIM | Ulcerative Colitis | FCGR3B  |
| OMIM | Ulcerative Colitis | OLFM4   |
| OMIM | Ulcerative Colitis | LYPD8   |
| OMIM | Ulcerative Colitis | AIIDE   |
| OMIM | Ulcerative Colitis | LACH    |
| OMIM | Ulcerative Colitis | HIDS    |
| OMIM | Ulcerative Colitis | IKBKG   |
| OMIM | Ulcerative Colitis | IL10    |
| OMIM | Ulcerative Colitis | IL23A   |
| OMIM | Ulcerative Colitis | IL18BP  |
| OMIM | Ulcerative Colitis | XLP2    |

|      |                    |         |
|------|--------------------|---------|
| OMIM | Ulcerative Colitis | EDAID1  |
| OMIM | Ulcerative Colitis | PTGER4  |
| OMIM | Ulcerative Colitis | BTK     |
| OMIM | Ulcerative Colitis | NFIL3   |
| OMIM | Ulcerative Colitis | PYCARD  |
| OMIM | Ulcerative Colitis | NLRP6   |
| OMIM | Ulcerative Colitis | TFF2    |
| OMIM | Ulcerative Colitis | CGDX    |
| OMIM | Ulcerative Colitis | HPS4    |
| OMIM | Ulcerative Colitis | HPS5    |
| OMIM | Ulcerative Colitis | IMD71   |
| OMIM | Ulcerative Colitis | RIPK3   |
| OMIM | Ulcerative Colitis | TLR5    |
| OMIM | Ulcerative Colitis | IMD98   |
| OMIM | Ulcerative Colitis | HIGM1   |
| OMIM | Ulcerative Colitis | MSPC    |
| OMIM | Ulcerative Colitis | PF4     |
| OMIM | Ulcerative Colitis | SELE    |
| OMIM | Ulcerative Colitis | SELP    |
| OMIM | Ulcerative Colitis | CGD3    |
| OMIM | Ulcerative Colitis | HPS6    |
| OMIM | Ulcerative Colitis | THES2   |
| OMIM | Ulcerative Colitis | ADMIO2  |
| OMIM | Ulcerative Colitis | IMD70   |
| OMIM | Ulcerative Colitis | IMD82   |
| OMIM | Ulcerative Colitis | TFF1    |
| OMIM | Ulcerative Colitis | FADD    |
| OMIM | Ulcerative Colitis | FBXW7   |
| OMIM | Ulcerative Colitis | TNFSF4  |
| OMIM | Ulcerative Colitis | MIR155  |
| OMIM | Ulcerative Colitis | CXCL10  |
| OMIM | Ulcerative Colitis | LRRC32  |
| OMIM | Ulcerative Colitis | IL10RA  |
| OMIM | Ulcerative Colitis | TFF3    |
| OMIM | Ulcerative Colitis | FNDC4   |
| OMIM | Ulcerative Colitis | VNN1    |
| OMIM | Ulcerative Colitis | AHUS1   |
| OMIM | Ulcerative Colitis | FHL5    |
| OMIM | Ulcerative Colitis | HPS7    |
| OMIM | Ulcerative Colitis | CVID8   |
| OMIM | Ulcerative Colitis | NEDSPLB |
| OMIM | Ulcerative Colitis | CVID12  |
| OMIM | Ulcerative Colitis | CVID14  |
| OMIM | Ulcerative Colitis | IMD58   |

|      |                    |          |
|------|--------------------|----------|
| OMIM | Ulcerative Colitis | IMD14B   |
| OMIM | Ulcerative Colitis | AISIMD   |
| OMIM | Ulcerative Colitis | IMD97    |
| OMIM | Ulcerative Colitis | FMDA     |
| OMIM | Ulcerative Colitis | STAT3    |
| OMIM | Ulcerative Colitis | ZNF148   |
| OMIM | Ulcerative Colitis | TNFRSF14 |
| OMIM | Ulcerative Colitis | ACE2     |
| OMIM | Ulcerative Colitis | SIGIRR   |
| OMIM | Ulcerative Colitis | RETNLB   |
| OMIM | Ulcerative Colitis | IKBKB    |
| OMIM | Ulcerative Colitis | PRDM1    |
| OMIM | Ulcerative Colitis | ZBP1     |
| OMIM | Ulcerative Colitis | HPS6     |
| OMIM | Ulcerative Colitis | BTLA     |
| OMIM | Ulcerative Colitis | HCAR2    |
| OMIM | Ulcerative Colitis | IL6      |
| OMIM | Ulcerative Colitis | STING1   |
| OMIM | Ulcerative Colitis | STX2     |
| OMIM | Ulcerative Colitis | IL13     |
| OMIM | Ulcerative Colitis | PTPN11   |
| OMIM | Ulcerative Colitis | TP53     |
| OMIM | Ulcerative Colitis | WAS      |
| OMIM | Ulcerative Colitis | F2RL1    |
| OMIM | Ulcerative Colitis | NLRX1    |
| OMIM | Ulcerative Colitis | LAD1     |
| OMIM | Ulcerative Colitis | IMD103   |
| TTD  | Ulcerative Colitis | mTOR     |
| TTD  | Ulcerative Colitis | CCKBR    |
| TTD  | Ulcerative Colitis | TGA4     |
| TTD  | Ulcerative Colitis | COX-1    |
| TTD  | Ulcerative Colitis | S1PR1    |
| TTD  | Ulcerative Colitis | CXCR1    |
| TTD  | Ulcerative Colitis | CXCR2    |
| TTD  | Ulcerative Colitis | ATP4A    |
| TTD  | Ulcerative Colitis | JAK-1    |
| TTD  | Ulcerative Colitis | STAT3    |
| TTD  | Ulcerative Colitis | TNF      |
| TTD  | Ulcerative Colitis | ATIII    |
| TTD  | Ulcerative Colitis | GUCY2C   |
| TTD  | Ulcerative Colitis | H2R      |
| TTD  | Ulcerative Colitis | ICAM1    |
| TTD  | Ulcerative Colitis | PD-1     |
| TTD  | Ulcerative Colitis | CELA1    |



|     |                    |         |
|-----|--------------------|---------|
| TTD | Ulcerative Colitis | MMP-9   |
| TTD | Ulcerative Colitis | S6K1    |
| TTD | Ulcerative Colitis | PTGER4  |
| TTD | Ulcerative Colitis | CCR9    |
| TTD | Ulcerative Colitis | CXCL10  |
| TTD | Ulcerative Colitis | IL13RA2 |
| TTD | Ulcerative Colitis | MADCAM1 |
| TTD | Ulcerative Colitis | SMAD7   |
| TTD | Ulcerative Colitis | RIPK1   |
| TTD | Ulcerative Colitis | CCL11   |
| TTD | Ulcerative Colitis | PTK     |
| TTD | Ulcerative Colitis | OR      |
| TTD | Ulcerative Colitis | MCR     |
| TTD | Ulcerative Colitis | ATPase  |

---

**Supplementary Table 4 Genes related to NETs in the databases**

| Database | Disease                                 | Gene   |
|----------|-----------------------------------------|--------|
| Disgnent | Neutrophil extracellular trap formation | PADI4  |
| Disgnent | Neutrophil extracellular trap formation | H3C1   |
| Disgnent | Neutrophil extracellular trap formation | IL1B   |
| Disgnent | Neutrophil extracellular trap formation | H3C4   |
| Disgnent | Neutrophil extracellular trap formation | H3C3   |
| Disgnent | Neutrophil extracellular trap formation | H3C6   |
| Disgnent | Neutrophil extracellular trap formation | H3C11  |
| Disgnent | Neutrophil extracellular trap formation | H3C8   |
| Disgnent | Neutrophil extracellular trap formation | H3C7   |
| Disgnent | Neutrophil extracellular trap formation | H3C10  |
| Disgnent | Neutrophil extracellular trap formation | H3C12  |
| Disgnent | Neutrophil extracellular trap formation | H3C2   |
| Disgnent | Neutrophil extracellular trap formation | DECR1  |
| Disgnent | Neutrophil extracellular trap formation | VIP    |
| Disgnent | Neutrophil extracellular trap formation | MPO    |
| Disgnent | Neutrophil extracellular trap formation | TNF    |
| Disgnent | Neutrophil extracellular trap formation | SLC6A2 |
| Disgnent | Neutrophil extracellular trap formation | THBD   |
| Disgnent | Neutrophil extracellular trap formation | TIMP1  |
| Disgnent | Neutrophil extracellular trap formation | PROC   |

|          |                                         |        |
|----------|-----------------------------------------|--------|
| Disgnent | Neutrophil extracellular trap formation | RETN   |
| Disgnent | Neutrophil extracellular trap formation | TRPM2  |
| Disgnent | Neutrophil extracellular trap formation | VWF    |
| Disgnent | Neutrophil extracellular trap formation | CAMP   |
| Disgnent | Neutrophil extracellular trap formation | CASP1  |
| Disgnent | Neutrophil extracellular trap formation | CLEC6A |
| Disgnent | Neutrophil extracellular trap formation | ELK3   |
| Disgnent | Neutrophil extracellular trap formation | RIPK1  |
| Disgnent | Neutrophil extracellular trap formation | IL33   |
| Disgnent | Neutrophil extracellular trap formation | MAPK1  |
| Disgnent | Neutrophil extracellular trap formation | P2RY6  |
| Disgnent | Neutrophil extracellular trap formation | F3     |
| Disgnent | Neutrophil extracellular trap formation | ESR2   |
| Disgnent | Neutrophil extracellular trap formation | ESR1   |
| Disgnent | Neutrophil extracellular trap formation | EPHB2  |
| Disgnent | Neutrophil extracellular trap formation | EPHB1  |
| Disgnent | Neutrophil extracellular trap formation | UNC13D |
| Disgnent | Neutrophil extracellular trap formation | ELANE  |
| Disgnent | Neutrophil extracellular trap formation | ACE    |
| Disgnent | Neutrophil extracellular trap formation | CRP    |
| Disgnent | Neutrophil extracellular trap formation | COX8A  |
| Disgnent | Neutrophil extracellular trap formation | SIRT3  |

|           |                                         |          |
|-----------|-----------------------------------------|----------|
| Disgnent  | Neutrophil extracellular trap formation | CLEC5A   |
| Disgnent  | Neutrophil extracellular trap formation | MTOR     |
| Disgnent  | Neutrophil extracellular trap formation | MIR146A  |
| Disgnent  | Neutrophil extracellular trap formation | SH2D1A   |
| Disgnent  | Neutrophil extracellular trap formation | IL18     |
| Disgnent  | Neutrophil extracellular trap formation | CXCL8    |
| Disgnent  | Neutrophil extracellular trap formation | IL1RN    |
| Disgnent  | Neutrophil extracellular trap formation | IL1A     |
| Disgnent  | Neutrophil extracellular trap formation | HMGB1    |
| Disgnent  | Neutrophil extracellular trap formation | CXCL2    |
| Disgnent  | Neutrophil extracellular trap formation | GPB1     |
| Disgnent  | Neutrophil extracellular trap formation | PCSK9    |
| Disgnent  | Neutrophil extracellular trap formation | NLRP3    |
| GeneCards | Neutrophil extracellular trap formation | ELANE    |
| GeneCards | Neutrophil extracellular trap formation | RAC2     |
| GeneCards | Neutrophil extracellular trap formation | TNFRSF1A |
| GeneCards | Neutrophil extracellular trap formation | CXCL8    |
| GeneCards | Neutrophil extracellular trap formation | MPO      |
| GeneCards | Neutrophil extracellular trap formation | NCF2     |
| GeneCards | Neutrophil extracellular trap formation | TNF      |
| GeneCards | Neutrophil extracellular trap formation | NCF1     |
| GeneCards | Neutrophil extracellular trap formation | MEFV     |

|           |                                         |        |
|-----------|-----------------------------------------|--------|
| GeneCards | Neutrophil extracellular trap formation | MAPK1  |
| GeneCards | Neutrophil extracellular trap formation | ITGB2  |
| GeneCards | Neutrophil extracellular trap formation | PRTN3  |
| GeneCards | Neutrophil extracellular trap formation | NCF4   |
| GeneCards | Neutrophil extracellular trap formation | IL1B   |
| GeneCards | Neutrophil extracellular trap formation | ITGAM  |
| GeneCards | Neutrophil extracellular trap formation | EFEMP2 |
| GeneCards | Neutrophil extracellular trap formation | MMP9   |
| GeneCards | Neutrophil extracellular trap formation | LTF    |
| GeneCards | Neutrophil extracellular trap formation | LCN2   |
| GeneCards | Neutrophil extracellular trap formation | EFEMP1 |
| GeneCards | Neutrophil extracellular trap formation | CTSG   |
| GeneCards | Neutrophil extracellular trap formation | CXCR2  |
| GeneCards | Neutrophil extracellular trap formation | ECM1   |
| GeneCards | Neutrophil extracellular trap formation | IL6    |
| GeneCards | Neutrophil extracellular trap formation | CSF3   |
| GeneCards | Neutrophil extracellular trap formation | SOD3   |
| GeneCards | Neutrophil extracellular trap formation | FCGR3B |
| GeneCards | Neutrophil extracellular trap formation | MMP8   |
| GeneCards | Neutrophil extracellular trap formation | MAPK3  |
| GeneCards | Neutrophil extracellular trap formation | IL1RN  |
| GeneCards | Neutrophil extracellular trap formation | ELN    |

|           |                                         |          |
|-----------|-----------------------------------------|----------|
| GeneCards | Neutrophil extracellular trap formation | CXCR4    |
| GeneCards | Neutrophil extracellular trap formation | NLRP3    |
| GeneCards | Neutrophil extracellular trap formation | SELL     |
| GeneCards | Neutrophil extracellular trap formation | SOD1     |
| GeneCards | Neutrophil extracellular trap formation | MMP2     |
| GeneCards | Neutrophil extracellular trap formation | CD177    |
| GeneCards | Neutrophil extracellular trap formation | PIK3CG   |
| GeneCards | Neutrophil extracellular trap formation | CYBB     |
| GeneCards | Neutrophil extracellular trap formation | ICAM1    |
| GeneCards | Neutrophil extracellular trap formation | MEPE     |
| GeneCards | Neutrophil extracellular trap formation | SELP     |
| GeneCards | Neutrophil extracellular trap formation | IFNG     |
| GeneCards | Neutrophil extracellular trap formation | CCL2     |
| GeneCards | Neutrophil extracellular trap formation | TGFB1    |
| GeneCards | Neutrophil extracellular trap formation | FN1      |
| GeneCards | Neutrophil extracellular trap formation | MAPK14   |
| GeneCards | Neutrophil extracellular trap formation | CSF2     |
| GeneCards | Neutrophil extracellular trap formation | S100A9   |
| GeneCards | Neutrophil extracellular trap formation | FBN1     |
| GeneCards | Neutrophil extracellular trap formation | IL17A    |
| GeneCards | Neutrophil extracellular trap formation | APP      |
| GeneCards | Neutrophil extracellular trap formation | SERPINB1 |

|           |                                         |        |
|-----------|-----------------------------------------|--------|
| GeneCards | Neutrophil extracellular trap formation | FPR1   |
| GeneCards | Neutrophil extracellular trap formation | VEGFA  |
| GeneCards | Neutrophil extracellular trap formation | HMGB1  |
| GeneCards | Neutrophil extracellular trap formation | CYBA   |
| GeneCards | Neutrophil extracellular trap formation | CAT    |
| GeneCards | Neutrophil extracellular trap formation | FRAS1  |
| GeneCards | Neutrophil extracellular trap formation | CXCL1  |
| GeneCards | Neutrophil extracellular trap formation | DNASE1 |
| GeneCards | Neutrophil extracellular trap formation | PPBP   |
| GeneCards | Neutrophil extracellular trap formation | MMP1   |
| GeneCards | Neutrophil extracellular trap formation | PRKCD  |
| GeneCards | Neutrophil extracellular trap formation | JAGN1  |
| GeneCards | Neutrophil extracellular trap formation | TLR4   |
| GeneCards | Neutrophil extracellular trap formation | GFI1   |
| GeneCards | Neutrophil extracellular trap formation | CRP    |
| GeneCards | Neutrophil extracellular trap formation | CAMP   |
| GeneCards | Neutrophil extracellular trap formation | CD36   |
| GeneCards | Neutrophil extracellular trap formation | LBR    |
| GeneCards | Neutrophil extracellular trap formation | IL1A   |
| GeneCards | Neutrophil extracellular trap formation | AZU1   |
| GeneCards | Neutrophil extracellular trap formation | AKT1   |
| GeneCards | Neutrophil extracellular trap formation | STAT3  |

|           |                                         |        |
|-----------|-----------------------------------------|--------|
| GeneCards | Neutrophil extracellular trap formation | SELE   |
| GeneCards | Neutrophil extracellular trap formation | TLR2   |
| GeneCards | Neutrophil extracellular trap formation | S100A8 |
| GeneCards | Neutrophil extracellular trap formation | PSEN1  |
| GeneCards | Neutrophil extracellular trap formation | C5AR1  |
| GeneCards | Neutrophil extracellular trap formation | CXCR1  |
| GeneCards | Neutrophil extracellular trap formation | ELFN2  |
| GeneCards | Neutrophil extracellular trap formation | ANXA1  |
| GeneCards | Neutrophil extracellular trap formation | IL18   |
| GeneCards | Neutrophil extracellular trap formation | IL10   |
| GeneCards | Neutrophil extracellular trap formation | CD40LG |
| GeneCards | Neutrophil extracellular trap formation | HSPG2  |
| GeneCards | Neutrophil extracellular trap formation | CD44   |
| GeneCards | Neutrophil extracellular trap formation | SYK    |
| GeneCards | Neutrophil extracellular trap formation | VTN    |
| GeneCards | Neutrophil extracellular trap formation | CASP3  |
| GeneCards | Neutrophil extracellular trap formation | JAK2   |
| GeneCards | Neutrophil extracellular trap formation | APOE   |
| GeneCards | Neutrophil extracellular trap formation | SPP1   |
| GeneCards | Neutrophil extracellular trap formation | CASR   |
| GeneCards | Neutrophil extracellular trap formation | THBS1  |
| GeneCards | Neutrophil extracellular trap formation | PECAM1 |



|           |                                         |          |
|-----------|-----------------------------------------|----------|
| GeneCards | Neutrophil extracellular trap formation | FPR2     |
| GeneCards | Neutrophil extracellular trap formation | DEFA1    |
| GeneCards | Neutrophil extracellular trap formation | FAS      |
| GeneCards | Neutrophil extracellular trap formation | FASLG    |
| GeneCards | Neutrophil extracellular trap formation | MIR223   |
| GeneCards | Neutrophil extracellular trap formation | MMP3     |
| GeneCards | Neutrophil extracellular trap formation | PLG      |
| GeneCards | Neutrophil extracellular trap formation | EGFR     |
| GeneCards | Neutrophil extracellular trap formation | VCAM1    |
| GeneCards | Neutrophil extracellular trap formation | ITGAL    |
| GeneCards | Neutrophil extracellular trap formation | SRP54    |
| GeneCards | Neutrophil extracellular trap formation | TIMP1    |
| GeneCards | Neutrophil extracellular trap formation | DCN      |
| GeneCards | Neutrophil extracellular trap formation | HAX1     |
| GeneCards | Neutrophil extracellular trap formation | SERPINA1 |
| GeneCards | Neutrophil extracellular trap formation | CDC42    |
| GeneCards | Neutrophil extracellular trap formation | ITGB1    |
| GeneCards | Neutrophil extracellular trap formation | PADI4    |
| GeneCards | Neutrophil extracellular trap formation | ALB      |
| GeneCards | Neutrophil extracellular trap formation | RAF1     |
| GeneCards | Neutrophil extracellular trap formation | TGFB2    |
| GeneCards | Neutrophil extracellular trap formation | MRTFA    |

|           |                                         |         |
|-----------|-----------------------------------------|---------|
| GeneCards | Neutrophil extracellular trap formation | IL4     |
| GeneCards | Neutrophil extracellular trap formation | LPIN2   |
| GeneCards | Neutrophil extracellular trap formation | BSG     |
| GeneCards | Neutrophil extracellular trap formation | RHOA    |
| GeneCards | Neutrophil extracellular trap formation | NOS2    |
| GeneCards | Neutrophil extracellular trap formation | TCIRG1  |
| GeneCards | Neutrophil extracellular trap formation | MMP14   |
| GeneCards | Neutrophil extracellular trap formation | PSTPIP1 |
| GeneCards | Neutrophil extracellular trap formation | PTGS2   |
| GeneCards | Neutrophil extracellular trap formation | TP53    |
| GeneCards | Neutrophil extracellular trap formation | XDH     |
| GeneCards | Neutrophil extracellular trap formation | VPS45   |
| GeneCards | Neutrophil extracellular trap formation | SRC     |
| GeneCards | Neutrophil extracellular trap formation | PLAU    |
| GeneCards | Neutrophil extracellular trap formation | F2RL1   |
| GeneCards | Neutrophil extracellular trap formation | PSMB4   |
| GeneCards | Neutrophil extracellular trap formation | JUN     |
| GeneCards | Neutrophil extracellular trap formation | MAPK8   |
| GeneCards | Neutrophil extracellular trap formation | CSF1    |
| GeneCards | Neutrophil extracellular trap formation | CFH     |
| GeneCards | Neutrophil extracellular trap formation | TNC     |
| GeneCards | Neutrophil extracellular trap formation | G6PC3   |

|           |                                         |          |
|-----------|-----------------------------------------|----------|
| GeneCards | Neutrophil extracellular trap formation | CXCL2    |
| GeneCards | Neutrophil extracellular trap formation | FBLN5    |
| GeneCards | Neutrophil extracellular trap formation | CEACAM1  |
| GeneCards | Neutrophil extracellular trap formation | CYCS     |
| GeneCards | Neutrophil extracellular trap formation | KIT      |
| GeneCards | Neutrophil extracellular trap formation | SELPLG   |
| GeneCards | Neutrophil extracellular trap formation | EGF      |
| GeneCards | Neutrophil extracellular trap formation | SPON1    |
| GeneCards | Neutrophil extracellular trap formation | MAP2K1   |
| GeneCards | Neutrophil extracellular trap formation | HLA-DRB1 |
| GeneCards | Neutrophil extracellular trap formation | CCL3     |
| GeneCards | Neutrophil extracellular trap formation | LOX      |
| GeneCards | Neutrophil extracellular trap formation | LCP2     |
| GeneCards | Neutrophil extracellular trap formation | CXCL12   |
| GeneCards | Neutrophil extracellular trap formation | WDR1     |
| GeneCards | Neutrophil extracellular trap formation | NFKBIA   |
| GeneCards | Neutrophil extracellular trap formation | TGFB3    |
| GeneCards | Neutrophil extracellular trap formation | ITGA4    |
| GeneCards | Neutrophil extracellular trap formation | FGF2     |
| GeneCards | Neutrophil extracellular trap formation | MAPK10   |
| GeneCards | Neutrophil extracellular trap formation | VWF      |
| GeneCards | Neutrophil extracellular trap formation | DNASE1L3 |

|           |                                         |         |
|-----------|-----------------------------------------|---------|
| GeneCards | Neutrophil extracellular trap formation | HPSE    |
| GeneCards | Neutrophil extracellular trap formation | ITGB3   |
| GeneCards | Neutrophil extracellular trap formation | ADAM10  |
| GeneCards | Neutrophil extracellular trap formation | KRAS    |
| GeneCards | Neutrophil extracellular trap formation | IL36RN  |
| GeneCards | Neutrophil extracellular trap formation | MYH9    |
| GeneCards | Neutrophil extracellular trap formation | IL3     |
| GeneCards | Neutrophil extracellular trap formation | RAC1    |
| GeneCards | Neutrophil extracellular trap formation | LOXL1   |
| GeneCards | Neutrophil extracellular trap formation | KRIT1   |
| GeneCards | Neutrophil extracellular trap formation | SPARC   |
| GeneCards | Neutrophil extracellular trap formation | LGALS3  |
| GeneCards | Neutrophil extracellular trap formation | MMP13   |
| GeneCards | Neutrophil extracellular trap formation | CXCL6   |
| GeneCards | Neutrophil extracellular trap formation | FCGR2A  |
| GeneCards | Neutrophil extracellular trap formation | BCL2    |
| GeneCards | Neutrophil extracellular trap formation | NFKB1   |
| GeneCards | Neutrophil extracellular trap formation | TERT    |
| GeneCards | Neutrophil extracellular trap formation | SLPI    |
| GeneCards | Neutrophil extracellular trap formation | PLA2G2A |
| GeneCards | Neutrophil extracellular trap formation | COL1A1  |
| GeneCards | Neutrophil extracellular trap formation | FCGR1A  |

|           |                                         |          |
|-----------|-----------------------------------------|----------|
| GeneCards | Neutrophil extracellular trap formation | ACAN     |
| GeneCards | Neutrophil extracellular trap formation | FCGR3A   |
| GeneCards | Neutrophil extracellular trap formation | CTSB     |
| GeneCards | Neutrophil extracellular trap formation | CCL5     |
| GeneCards | Neutrophil extracellular trap formation | RNASE3   |
| GeneCards | Neutrophil extracellular trap formation | LMNA     |
| GeneCards | Neutrophil extracellular trap formation | GUSB     |
| GeneCards | Neutrophil extracellular trap formation | WAS      |
| GeneCards | Neutrophil extracellular trap formation | ADA      |
| GeneCards | Neutrophil extracellular trap formation | TEK      |
| GeneCards | Neutrophil extracellular trap formation | PIK3CD   |
| GeneCards | Neutrophil extracellular trap formation | COL18A1  |
| GeneCards | Neutrophil extracellular trap formation | VCAN     |
| GeneCards | Neutrophil extracellular trap formation | F3       |
| GeneCards | Neutrophil extracellular trap formation | VCL      |
| GeneCards | Neutrophil extracellular trap formation | CTSL     |
| GeneCards | Neutrophil extracellular trap formation | TGFBR1   |
| GeneCards | Neutrophil extracellular trap formation | CALR     |
| GeneCards | Neutrophil extracellular trap formation | TREM1    |
| GeneCards | Neutrophil extracellular trap formation | ADAMTSL1 |
| GeneCards | Neutrophil extracellular trap formation | FBLN1    |
| GeneCards | Neutrophil extracellular trap formation | NOS3     |

|           |                                         |          |
|-----------|-----------------------------------------|----------|
| GeneCards | Neutrophil extracellular trap formation | INS      |
| GeneCards | Neutrophil extracellular trap formation | PLAUR    |
| GeneCards | Neutrophil extracellular trap formation | AGER     |
| GeneCards | Neutrophil extracellular trap formation | LAMC1    |
| GeneCards | Neutrophil extracellular trap formation | LSP1     |
| GeneCards | Neutrophil extracellular trap formation | EDN1     |
| GeneCards | Neutrophil extracellular trap formation | COMP     |
| GeneCards | Neutrophil extracellular trap formation | IL1R1    |
| GeneCards | Neutrophil extracellular trap formation | STAT1    |
| GeneCards | Neutrophil extracellular trap formation | ACP5     |
| GeneCards | Neutrophil extracellular trap formation | ADA2     |
| GeneCards | Neutrophil extracellular trap formation | SIGLEC5  |
| GeneCards | Neutrophil extracellular trap formation | PTPRC    |
| GeneCards | Neutrophil extracellular trap formation | GATA2    |
| GeneCards | Neutrophil extracellular trap formation | SERPINA3 |
| GeneCards | Neutrophil extracellular trap formation | PPARG    |
| GeneCards | Neutrophil extracellular trap formation | PRKCA    |
| GeneCards | Neutrophil extracellular trap formation | FBN2     |
| GeneCards | Neutrophil extracellular trap formation | PTPN6    |
| GeneCards | Neutrophil extracellular trap formation | COL11A1  |
| GeneCards | Neutrophil extracellular trap formation | CFTR     |
| GeneCards | Neutrophil extracellular trap formation | CD14     |

|           |                                         |          |
|-----------|-----------------------------------------|----------|
| GeneCards | Neutrophil extracellular trap formation | CDH1     |
| GeneCards | Neutrophil extracellular trap formation | C3       |
| GeneCards | Neutrophil extracellular trap formation | BGN      |
| GeneCards | Neutrophil extracellular trap formation | IL5      |
| GeneCards | Neutrophil extracellular trap formation | SMAD4    |
| GeneCards | Neutrophil extracellular trap formation | F2R      |
| GeneCards | Neutrophil extracellular trap formation | PF4      |
| GeneCards | Neutrophil extracellular trap formation | COL11A2  |
| GeneCards | Neutrophil extracellular trap formation | IL2      |
| GeneCards | Neutrophil extracellular trap formation | DAG1     |
| GeneCards | Neutrophil extracellular trap formation | TET2     |
| GeneCards | Neutrophil extracellular trap formation | ABL1     |
| GeneCards | Neutrophil extracellular trap formation | RUNX1    |
| GeneCards | Neutrophil extracellular trap formation | PLA2G4A  |
| GeneCards | Neutrophil extracellular trap formation | MMP7     |
| GeneCards | Neutrophil extracellular trap formation | TRPM2    |
| GeneCards | Neutrophil extracellular trap formation | CTSD     |
| GeneCards | Neutrophil extracellular trap formation | TGFBR2   |
| GeneCards | Neutrophil extracellular trap formation | SERPINE1 |
| GeneCards | Neutrophil extracellular trap formation | RAB27A   |
| GeneCards | Neutrophil extracellular trap formation | KITLG    |
| GeneCards | Neutrophil extracellular trap formation | HMCN1    |

|           |                                         |        |
|-----------|-----------------------------------------|--------|
| GeneCards | Neutrophil extracellular trap formation | FLT3   |
| GeneCards | Neutrophil extracellular trap formation | TTR    |
| GeneCards | Neutrophil extracellular trap formation | MMP12  |
| GeneCards | Neutrophil extracellular trap formation | CTLA4  |
| GeneCards | Neutrophil extracellular trap formation | SSR1   |
| GeneCards | Neutrophil extracellular trap formation | SPN    |
| GeneCards | Neutrophil extracellular trap formation | PTPN22 |
| GeneCards | Neutrophil extracellular trap formation | FOS    |
| GeneCards | Neutrophil extracellular trap formation | TNXB   |
| GeneCards | Neutrophil extracellular trap formation | LAMC2  |
| GeneCards | Neutrophil extracellular trap formation | CDKN3  |
| GeneCards | Neutrophil extracellular trap formation | PTK2   |
| GeneCards | Neutrophil extracellular trap formation | PTEN   |
| GeneCards | Neutrophil extracellular trap formation | ERBB2  |
| GeneCards | Neutrophil extracellular trap formation | ITGAV  |
| GeneCards | Neutrophil extracellular trap formation | C4A    |
| GeneCards | Neutrophil extracellular trap formation | ADAM17 |
| GeneCards | Neutrophil extracellular trap formation | CD4    |
| GeneCards | Neutrophil extracellular trap formation | MUC5AC |
| GeneCards | Neutrophil extracellular trap formation | SMAD3  |
| GeneCards | Neutrophil extracellular trap formation | MYD88  |
| GeneCards | Neutrophil extracellular trap formation | STAT5B |



|           |                                         |         |
|-----------|-----------------------------------------|---------|
| GeneCards | Neutrophil extracellular trap formation | PRF1    |
| GeneCards | Neutrophil extracellular trap formation | MIR146A |
| GeneCards | Neutrophil extracellular trap formation | LAMB1   |
| GeneCards | Neutrophil extracellular trap formation | LYN     |
| GeneCards | Neutrophil extracellular trap formation | FCAR    |
| GeneCards | Neutrophil extracellular trap formation | COL5A1  |
| GeneCards | Neutrophil extracellular trap formation | CST3    |
| GeneCards | Neutrophil extracellular trap formation | CD40    |
| GeneCards | Neutrophil extracellular trap formation | ITGA2   |
| GeneCards | Neutrophil extracellular trap formation | LTBP4   |
| GeneCards | Neutrophil extracellular trap formation | ADORA2A |
| GeneCards | Neutrophil extracellular trap formation | ADCY10  |
| GeneCards | Neutrophil extracellular trap formation | GSN     |
| GeneCards | Neutrophil extracellular trap formation | PLCG2   |
| GeneCards | Neutrophil extracellular trap formation | PTPN11  |
| GeneCards | Neutrophil extracellular trap formation | A2M     |
| GeneCards | Neutrophil extracellular trap formation | TIMP3   |
| GeneCards | Neutrophil extracellular trap formation | HGF     |
| GeneCards | Neutrophil extracellular trap formation | EMILIN1 |
| GeneCards | Neutrophil extracellular trap formation | CASP1   |
| GeneCards | Neutrophil extracellular trap formation | ADAMTS4 |
| GeneCards | Neutrophil extracellular trap formation | CYBC1   |

|           |                                         |         |
|-----------|-----------------------------------------|---------|
| GeneCards | Neutrophil extracellular trap formation | CLU     |
| GeneCards | Neutrophil extracellular trap formation | OTULIN  |
| GeneCards | Neutrophil extracellular trap formation | TGM2    |
| GeneCards | Neutrophil extracellular trap formation | PXN     |
| GeneCards | Neutrophil extracellular trap formation | CTSK    |
| GeneCards | Neutrophil extracellular trap formation | COL1A2  |
| GeneCards | Neutrophil extracellular trap formation | RETN    |
| GeneCards | Neutrophil extracellular trap formation | COL14A1 |
| GeneCards | Neutrophil extracellular trap formation | SMAD2   |
| GeneCards | Neutrophil extracellular trap formation | ACTB    |
| GeneCards | Neutrophil extracellular trap formation | CR1     |
| GeneCards | Neutrophil extracellular trap formation | IL15    |
| GeneCards | Neutrophil extracellular trap formation | TGFA    |
| GeneCards | Neutrophil extracellular trap formation | MCL1    |
| GeneCards | Neutrophil extracellular trap formation | CXCL10  |
| GeneCards | Neutrophil extracellular trap formation | CD34    |
| GeneCards | Neutrophil extracellular trap formation | ITGA6   |
| GeneCards | Neutrophil extracellular trap formation | SAA1    |
| GeneCards | Neutrophil extracellular trap formation | DMD     |
| GeneCards | Neutrophil extracellular trap formation | CD79A   |
| GeneCards | Neutrophil extracellular trap formation | CCL11   |
| GeneCards | Neutrophil extracellular trap formation | ACTA2   |

|           |                                         |        |
|-----------|-----------------------------------------|--------|
| GeneCards | Neutrophil extracellular trap formation | ANXA5  |
| GeneCards | Neutrophil extracellular trap formation | SPON2  |
| GeneCards | Neutrophil extracellular trap formation | CD47   |
| GeneCards | Neutrophil extracellular trap formation | HCK    |
| GeneCards | Neutrophil extracellular trap formation | CCR3   |
| GeneCards | Neutrophil extracellular trap formation | PTK2B  |
| GeneCards | Neutrophil extracellular trap formation | CD55   |
| GeneCards | Neutrophil extracellular trap formation | CASP8  |
| GeneCards | Neutrophil extracellular trap formation | MME    |
| GeneCards | Neutrophil extracellular trap formation | MMP25  |
| GeneCards | Neutrophil extracellular trap formation | LRP1   |
| GeneCards | Neutrophil extracellular trap formation | KDR    |
| GeneCards | Neutrophil extracellular trap formation | PIK3R1 |
| GeneCards | Neutrophil extracellular trap formation | HIF1A  |
| GeneCards | Neutrophil extracellular trap formation | RPS14  |
| GeneCards | Neutrophil extracellular trap formation | MYC    |
| GeneCards | Neutrophil extracellular trap formation | DMP1   |
| GeneCards | Neutrophil extracellular trap formation | TLR9   |
| GeneCards | Neutrophil extracellular trap formation | RELA   |
| GeneCards | Neutrophil extracellular trap formation | MATN1  |
| GeneCards | Neutrophil extracellular trap formation | GAPDH  |
| GeneCards | Neutrophil extracellular trap formation | RAP1A  |

|           |                                         |          |
|-----------|-----------------------------------------|----------|
| GeneCards | Neutrophil extracellular trap formation | KNG1     |
| GeneCards | Neutrophil extracellular trap formation | CTNNB1   |
| GeneCards | Neutrophil extracellular trap formation | HLA-B    |
| GeneCards | Neutrophil extracellular trap formation | IL13     |
| GeneCards | Neutrophil extracellular trap formation | MIF      |
| GeneCards | Neutrophil extracellular trap formation | FGR      |
| GeneCards | Neutrophil extracellular trap formation | F2       |
| GeneCards | Neutrophil extracellular trap formation | SERPINC1 |
| GeneCards | Neutrophil extracellular trap formation | SSR3     |
| GeneCards | Neutrophil extracellular trap formation | ANGPT1   |
| GeneCards | Neutrophil extracellular trap formation | EGR1     |
| GeneCards | Neutrophil extracellular trap formation | RTEL1    |
| GeneCards | Neutrophil extracellular trap formation | CD63     |
| GeneCards | Neutrophil extracellular trap formation | CCDC25   |
| GeneCards | Neutrophil extracellular trap formation | TERC     |
| GeneCards | Neutrophil extracellular trap formation | CCR5     |
| GeneCards | Neutrophil extracellular trap formation | TCN1     |
| GeneCards | Neutrophil extracellular trap formation | HSP90AA1 |
| GeneCards | Neutrophil extracellular trap formation | NOD2     |
| GeneCards | Neutrophil extracellular trap formation | BMP6     |
| GeneCards | Neutrophil extracellular trap formation | MVK      |
| GeneCards | Neutrophil extracellular trap formation | DDR1     |

|           |                                         |         |
|-----------|-----------------------------------------|---------|
| GeneCards | Neutrophil extracellular trap formation | PTPN3   |
| GeneCards | Neutrophil extracellular trap formation | MMP10   |
| GeneCards | Neutrophil extracellular trap formation | TFRC    |
| GeneCards | Neutrophil extracellular trap formation | TG      |
| GeneCards | Neutrophil extracellular trap formation | ICAM3   |
| GeneCards | Neutrophil extracellular trap formation | APOA1   |
| GeneCards | Neutrophil extracellular trap formation | TF      |
| GeneCards | Neutrophil extracellular trap formation | NR3C1   |
| GeneCards | Neutrophil extracellular trap formation | PRSS57  |
| GeneCards | Neutrophil extracellular trap formation | SPI1    |
| GeneCards | Neutrophil extracellular trap formation | FGFR1   |
| GeneCards | Neutrophil extracellular trap formation | PLA2G6  |
| GeneCards | Neutrophil extracellular trap formation | SLC5A5  |
| GeneCards | Neutrophil extracellular trap formation | RIPOR2  |
| GeneCards | Neutrophil extracellular trap formation | RELN    |
| GeneCards | Neutrophil extracellular trap formation | NPM1    |
| GeneCards | Neutrophil extracellular trap formation | IGF1    |
| GeneCards | Neutrophil extracellular trap formation | MIR29B1 |
| GeneCards | Neutrophil extracellular trap formation | TLR3    |
| GeneCards | Neutrophil extracellular trap formation | ADIPOQ  |
| GeneCards | Neutrophil extracellular trap formation | PTX3    |
| GeneCards | Neutrophil extracellular trap formation | ITGA2B  |

|           |                                         |        |
|-----------|-----------------------------------------|--------|
| GeneCards | Neutrophil extracellular trap formation | IFNA1  |
| GeneCards | Neutrophil extracellular trap formation | LEP    |
| GeneCards | Neutrophil extracellular trap formation | SSR4   |
| GeneCards | Neutrophil extracellular trap formation | AMBP   |
| GeneCards | Neutrophil extracellular trap formation | DDR2   |
| GeneCards | Neutrophil extracellular trap formation | MMP11  |
| GeneCards | Neutrophil extracellular trap formation | GRN    |
| GeneCards | Neutrophil extracellular trap formation | ITGA5  |
| GeneCards | Neutrophil extracellular trap formation | MIR34A |
| GeneCards | Neutrophil extracellular trap formation | MATN3  |
| GeneCards | Neutrophil extracellular trap formation | LTA4H  |
| GeneCards | Neutrophil extracellular trap formation | ENO1   |
| GeneCards | Neutrophil extracellular trap formation | CCR1   |
| GeneCards | Neutrophil extracellular trap formation | COL6A1 |
| GeneCards | Neutrophil extracellular trap formation | BAX    |
| GeneCards | Neutrophil extracellular trap formation | GBF1   |
| GeneCards | Neutrophil extracellular trap formation | CBL    |
| GeneCards | Neutrophil extracellular trap formation | INPP5D |
| GeneCards | Neutrophil extracellular trap formation | LGALS1 |
| GeneCards | Neutrophil extracellular trap formation | STAT5A |
| GeneCards | Neutrophil extracellular trap formation | POSTN  |
| GeneCards | Neutrophil extracellular trap formation | MTOR   |

|           |                                         |         |
|-----------|-----------------------------------------|---------|
| GeneCards | Neutrophil extracellular trap formation | RHOG    |
| GeneCards | Neutrophil extracellular trap formation | SFTPD   |
| GeneCards | Neutrophil extracellular trap formation | GZMB    |
| GeneCards | Neutrophil extracellular trap formation | MET     |
| GeneCards | Neutrophil extracellular trap formation | NAMPT   |
| GeneCards | Neutrophil extracellular trap formation | CTSC    |
| GeneCards | Neutrophil extracellular trap formation | UBA1    |
| GeneCards | Neutrophil extracellular trap formation | KCNN4   |
| GeneCards | Neutrophil extracellular trap formation | HSPA1A  |
| GeneCards | Neutrophil extracellular trap formation | NGF     |
| GeneCards | Neutrophil extracellular trap formation | NOS1    |
| GeneCards | Neutrophil extracellular trap formation | ETV6    |
| GeneCards | Neutrophil extracellular trap formation | PLA2G1B |
| GeneCards | Neutrophil extracellular trap formation | IL33    |
| GeneCards | Neutrophil extracellular trap formation | HMOX1   |
| GeneCards | Neutrophil extracellular trap formation | LOXL2   |
| GeneCards | Neutrophil extracellular trap formation | ESR1    |
| GeneCards | Neutrophil extracellular trap formation | OLFM4   |
| GeneCards | Neutrophil extracellular trap formation | PLAT    |
| GeneCards | Neutrophil extracellular trap formation | P2RY2   |
| GeneCards | Neutrophil extracellular trap formation | ANPEP   |
| GeneCards | Neutrophil extracellular trap formation | CCN2    |

|           |                                         |         |
|-----------|-----------------------------------------|---------|
| GeneCards | Neutrophil extracellular trap formation | ACTG1   |
| GeneCards | Neutrophil extracellular trap formation | DSPP    |
| GeneCards | Neutrophil extracellular trap formation | C5      |
| GeneCards | Neutrophil extracellular trap formation | THBD    |
| GeneCards | Neutrophil extracellular trap formation | CCR6    |
| GeneCards | Neutrophil extracellular trap formation | EPX     |
| GeneCards | Neutrophil extracellular trap formation | SRPRA   |
| GeneCards | Neutrophil extracellular trap formation | CLEC4A  |
| GeneCards | Neutrophil extracellular trap formation | IL6ST   |
| GeneCards | Neutrophil extracellular trap formation | DPP4    |
| GeneCards | Neutrophil extracellular trap formation | SLC4A1  |
| GeneCards | Neutrophil extracellular trap formation | ITGA7   |
| GeneCards | Neutrophil extracellular trap formation | TXN     |
| GeneCards | Neutrophil extracellular trap formation | HSPB1   |
| GeneCards | Neutrophil extracellular trap formation | SP1     |
| GeneCards | Neutrophil extracellular trap formation | BRAF    |
| GeneCards | Neutrophil extracellular trap formation | ACE     |
| GeneCards | Neutrophil extracellular trap formation | HAPLN1  |
| GeneCards | Neutrophil extracellular trap formation | FLT1    |
| GeneCards | Neutrophil extracellular trap formation | SCNN1A  |
| GeneCards | Neutrophil extracellular trap formation | RARA    |
| GeneCards | Neutrophil extracellular trap formation | SLC19A1 |



|           |                                         |          |
|-----------|-----------------------------------------|----------|
| GeneCards | Neutrophil extracellular trap formation | HRAS     |
| GeneCards | Neutrophil extracellular trap formation | IL17F    |
| GeneCards | Neutrophil extracellular trap formation | CCL4     |
| GeneCards | Neutrophil extracellular trap formation | AMN      |
| GeneCards | Neutrophil extracellular trap formation | PTGS1    |
| GeneCards | Neutrophil extracellular trap formation | ARRB1    |
| GeneCards | Neutrophil extracellular trap formation | CREB1    |
| GeneCards | Neutrophil extracellular trap formation | ADAMTS1  |
| GeneCards | Neutrophil extracellular trap formation | ANGPT2   |
| GeneCards | Neutrophil extracellular trap formation | SFTPA1   |
| GeneCards | Neutrophil extracellular trap formation | NOTCH1   |
| GeneCards | Neutrophil extracellular trap formation | SRSF2    |
| GeneCards | Neutrophil extracellular trap formation | INSR     |
| GeneCards | Neutrophil extracellular trap formation | TNFRSF1B |
| GeneCards | Neutrophil extracellular trap formation | DSP      |
| GeneCards | Neutrophil extracellular trap formation | PDE4A    |
| GeneCards | Neutrophil extracellular trap formation | XIAP     |
| GeneCards | Neutrophil extracellular trap formation | MIR29A   |
| GeneCards | Neutrophil extracellular trap formation | CDKN1A   |
| GeneCards | Neutrophil extracellular trap formation | COL6A2   |
| GeneCards | Neutrophil extracellular trap formation | TNFSF10  |
| GeneCards | Neutrophil extracellular trap formation | ACP1     |

|           |                                         |          |
|-----------|-----------------------------------------|----------|
| GeneCards | Neutrophil extracellular trap formation | ABCB1    |
| GeneCards | Neutrophil extracellular trap formation | NFE2L2   |
| GeneCards | Neutrophil extracellular trap formation | VIM      |
| GeneCards | Neutrophil extracellular trap formation | SCYL1    |
| GeneCards | Neutrophil extracellular trap formation | SHC1     |
| GeneCards | Neutrophil extracellular trap formation | G6PD     |
| GeneCards | Neutrophil extracellular trap formation | HBEGF    |
| GeneCards | Neutrophil extracellular trap formation | ABCA1    |
| GeneCards | Neutrophil extracellular trap formation | BTK      |
| GeneCards | Neutrophil extracellular trap formation | SSR2     |
| GeneCards | Neutrophil extracellular trap formation | CP       |
| GeneCards | Neutrophil extracellular trap formation | CTSS     |
| GeneCards | Neutrophil extracellular trap formation | FURIN    |
| GeneCards | Neutrophil extracellular trap formation | GP1BA    |
| GeneCards | Neutrophil extracellular trap formation | LIF      |
| GeneCards | Neutrophil extracellular trap formation | CASP9    |
| GeneCards | Neutrophil extracellular trap formation | IL1RAPL2 |
| GeneCards | Neutrophil extracellular trap formation | FGA      |
| GeneCards | Neutrophil extracellular trap formation | EFL1     |
| GeneCards | Neutrophil extracellular trap formation | IL2RA    |
| GeneCards | Neutrophil extracellular trap formation | FCN1     |
| GeneCards | Neutrophil extracellular trap formation | TNFSF11  |

|           |                                         |         |
|-----------|-----------------------------------------|---------|
| GeneCards | Neutrophil extracellular trap formation | POMP    |
| GeneCards | Neutrophil extracellular trap formation | TBK1    |
| GeneCards | Neutrophil extracellular trap formation | CASP10  |
| GeneCards | Neutrophil extracellular trap formation | BCL2L11 |
| GeneCards | Neutrophil extracellular trap formation | LAMB2   |
| GeneCards | Neutrophil extracellular trap formation | NT5E    |
| GeneCards | Neutrophil extracellular trap formation | PPARA   |
| GeneCards | Neutrophil extracellular trap formation | CCL20   |
| GeneCards | Neutrophil extracellular trap formation | MED30   |
| GeneCards | Neutrophil extracellular trap formation | PIK3CB  |
| GeneCards | Neutrophil extracellular trap formation | CXADR   |
| GeneCards | Neutrophil extracellular trap formation | FERMT3  |
| GeneCards | Neutrophil extracellular trap formation | IL17RA  |
| GeneCards | Neutrophil extracellular trap formation | ARRB2   |
| GeneCards | Neutrophil extracellular trap formation | NPPA    |
| GeneCards | Neutrophil extracellular trap formation | ACTC1   |
| GeneCards | Neutrophil extracellular trap formation | GSK3B   |
| GeneCards | Neutrophil extracellular trap formation | TTN     |
| GeneCards | Neutrophil extracellular trap formation | CEBPA   |
| GeneCards | Neutrophil extracellular trap formation | PAK1    |
| GeneCards | Neutrophil extracellular trap formation | ADRB2   |
| GeneCards | Neutrophil extracellular trap formation | MMP20   |

|           |                                         |        |
|-----------|-----------------------------------------|--------|
| GeneCards | Neutrophil extracellular trap formation | GSDMD  |
| GeneCards | Neutrophil extracellular trap formation | BIRC5  |
| GeneCards | Neutrophil extracellular trap formation | BGLAP  |
| GeneCards | Neutrophil extracellular trap formation | CD68   |
| GeneCards | Neutrophil extracellular trap formation | MUC1   |
| GeneCards | Neutrophil extracellular trap formation | HP     |
| GeneCards | Neutrophil extracellular trap formation | NRAS   |
| GeneCards | Neutrophil extracellular trap formation | IL1RL2 |
| GeneCards | Neutrophil extracellular trap formation | HFE    |
| GeneCards | Neutrophil extracellular trap formation | PML    |
| GeneCards | Neutrophil extracellular trap formation | SULF2  |
| GeneCards | Neutrophil extracellular trap formation | PTPN1  |
| GeneCards | Neutrophil extracellular trap formation | CDH5   |
| GeneCards | Neutrophil extracellular trap formation | MDK    |
| GeneCards | Neutrophil extracellular trap formation | PDGFRB |
| GeneCards | Neutrophil extracellular trap formation | CCL24  |
| GeneCards | Neutrophil extracellular trap formation | BCR    |
| GeneCards | Neutrophil extracellular trap formation | ICAM2  |
| GeneCards | Neutrophil extracellular trap formation | CLPB   |
| GeneCards | Neutrophil extracellular trap formation | CCL7   |
| GeneCards | Neutrophil extracellular trap formation | HAS2   |
| GeneCards | Neutrophil extracellular trap formation | HLA-A  |

|           |                                         |         |
|-----------|-----------------------------------------|---------|
| GeneCards | Neutrophil extracellular trap formation | GSR     |
| GeneCards | Neutrophil extracellular trap formation | BMP2    |
| GeneCards | Neutrophil extracellular trap formation | MYH7    |
| GeneCards | Neutrophil extracellular trap formation | C1R     |
| GeneCards | Neutrophil extracellular trap formation | CCND1   |
| GeneCards | Neutrophil extracellular trap formation | IL6R    |
| GeneCards | Neutrophil extracellular trap formation | OSM     |
| GeneCards | Neutrophil extracellular trap formation | U2AF1   |
| GeneCards | Neutrophil extracellular trap formation | TKT     |
| GeneCards | Neutrophil extracellular trap formation | NCAM1   |
| GeneCards | Neutrophil extracellular trap formation | CLEC12A |
| GeneCards | Neutrophil extracellular trap formation | PRKCZ   |
| GeneCards | Neutrophil extracellular trap formation | COL27A1 |
| GeneCards | Neutrophil extracellular trap formation | SULF1   |
| GeneCards | Neutrophil extracellular trap formation | GRB2    |
| GeneCards | Neutrophil extracellular trap formation | LAMB3   |
| GeneCards | Neutrophil extracellular trap formation | MAPT    |
| GeneCards | Neutrophil extracellular trap formation | CCL21   |
| GeneCards | Neutrophil extracellular trap formation | C1QBP   |
| GeneCards | Neutrophil extracellular trap formation | MIR155  |
| GeneCards | Neutrophil extracellular trap formation | STX4    |
| GeneCards | Neutrophil extracellular trap formation | JAM3    |

|           |                                         |         |
|-----------|-----------------------------------------|---------|
| GeneCards | Neutrophil extracellular trap formation | RPL5    |
| GeneCards | Neutrophil extracellular trap formation | SFTPC   |
| GeneCards | Neutrophil extracellular trap formation | PARP1   |
| GeneCards | Neutrophil extracellular trap formation | ARPC1B  |
| GeneCards | Neutrophil extracellular trap formation | BCOR    |
| GeneCards | Neutrophil extracellular trap formation | MAPK15  |
| GeneCards | Neutrophil extracellular trap formation | SIRPA   |
| GeneCards | Neutrophil extracellular trap formation | VSTM1   |
| GeneCards | Neutrophil extracellular trap formation | FGFR2   |
| GeneCards | Neutrophil extracellular trap formation | SHROOM3 |
| GeneCards | Neutrophil extracellular trap formation | EIF2AK3 |
| GeneCards | Neutrophil extracellular trap formation | ANTXR2  |
| GeneCards | Neutrophil extracellular trap formation | NPPB    |
| GeneCards | Neutrophil extracellular trap formation | P4HB    |
| GeneCards | Neutrophil extracellular trap formation | S100B   |
| GeneCards | Neutrophil extracellular trap formation | GC      |
| GeneCards | Neutrophil extracellular trap formation | TRPV1   |
| GeneCards | Neutrophil extracellular trap formation | SOD2    |
| GeneCards | Neutrophil extracellular trap formation | MED1    |
| GeneCards | Neutrophil extracellular trap formation | AGT     |
| GeneCards | Neutrophil extracellular trap formation | FKTN    |
| GeneCards | Neutrophil extracellular trap formation | C1QA    |

|           |                                         |         |
|-----------|-----------------------------------------|---------|
| GeneCards | Neutrophil extracellular trap formation | PIK3CA  |
| GeneCards | Neutrophil extracellular trap formation | AGRN    |
| GeneCards | Neutrophil extracellular trap formation | PROM1   |
| GeneCards | Neutrophil extracellular trap formation | IKBKG   |
| GeneCards | Neutrophil extracellular trap formation | TRAF2   |
| GeneCards | Neutrophil extracellular trap formation | EP300   |
| GeneCards | Neutrophil extracellular trap formation | AXL     |
| GeneCards | Neutrophil extracellular trap formation | S100A4  |
| GeneCards | Neutrophil extracellular trap formation | PIEZO1  |
| GeneCards | Neutrophil extracellular trap formation | LTA     |
| GeneCards | Neutrophil extracellular trap formation | TECTA   |
| GeneCards | Neutrophil extracellular trap formation | GNAQ    |
| GeneCards | Neutrophil extracellular trap formation | B2M     |
| GeneCards | Neutrophil extracellular trap formation | NLRP6   |
| GeneCards | Neutrophil extracellular trap formation | EPHB2   |
| GeneCards | Neutrophil extracellular trap formation | NRP1    |
| GeneCards | Neutrophil extracellular trap formation | PRKAR1A |
| GeneCards | Neutrophil extracellular trap formation | SF3B1   |
| GeneCards | Neutrophil extracellular trap formation | EPO     |
| GeneCards | Neutrophil extracellular trap formation | TMPO    |
| GeneCards | Neutrophil extracellular trap formation | COCH    |
| GeneCards | Neutrophil extracellular trap formation | NLRP12  |

|           |                                         |          |
|-----------|-----------------------------------------|----------|
| GeneCards | Neutrophil extracellular trap formation | MAPKAPK2 |
| GeneCards | Neutrophil extracellular trap formation | IL18R1   |
| GeneCards | Neutrophil extracellular trap formation | ASPN     |
| GeneCards | Neutrophil extracellular trap formation | GPX3     |
| GeneCards | Neutrophil extracellular trap formation | F11R     |
| GeneCards | Neutrophil extracellular trap formation | CLEC7A   |
| GeneCards | Neutrophil extracellular trap formation | ITGA3    |
| GeneCards | Neutrophil extracellular trap formation | HLA-DRA  |
| GeneCards | Neutrophil extracellular trap formation | HSPA4    |
| GeneCards | Neutrophil extracellular trap formation | TNFAIP3  |
| GeneCards | Neutrophil extracellular trap formation | UNC13D   |
| GeneCards | Neutrophil extracellular trap formation | SCN5A    |
| GeneCards | Neutrophil extracellular trap formation | CANT1    |
| GeneCards | Neutrophil extracellular trap formation | MAPK6    |
| GeneCards | Neutrophil extracellular trap formation | P2RY1    |
| GeneCards | Neutrophil extracellular trap formation | IGHE     |
| GeneCards | Neutrophil extracellular trap formation | MED24    |
| GeneCards | Neutrophil extracellular trap formation | MPL      |
| GeneCards | Neutrophil extracellular trap formation | VAV1     |
| GeneCards | Neutrophil extracellular trap formation | F5       |
| GeneCards | Neutrophil extracellular trap formation | IRAK4    |
| GeneCards | Neutrophil extracellular trap formation | ENTPD1   |



|           |                                         |        |
|-----------|-----------------------------------------|--------|
| GeneCards | Neutrophil extracellular trap formation | DNMT3A |
| GeneCards | Neutrophil extracellular trap formation | CGAS   |
| GeneCards | Neutrophil extracellular trap formation | NPNT   |
| GeneCards | Neutrophil extracellular trap formation | PLD1   |
| GeneCards | Neutrophil extracellular trap formation | PRKG1  |
| GeneCards | Neutrophil extracellular trap formation | TRAF3  |
| GeneCards | Neutrophil extracellular trap formation | ALOX12 |
| GeneCards | Neutrophil extracellular trap formation | SIRT1  |
| GeneCards | Neutrophil extracellular trap formation | ADGRE3 |
| GeneCards | Neutrophil extracellular trap formation | UMOD   |
| GeneCards | Neutrophil extracellular trap formation | CHUK   |
| GeneCards | Neutrophil extracellular trap formation | FHL2   |
| GeneCards | Neutrophil extracellular trap formation | CEBPB  |
| GeneCards | Neutrophil extracellular trap formation | DEFB1  |
| GeneCards | Neutrophil extracellular trap formation | BMP4   |
| GeneCards | Neutrophil extracellular trap formation | NEU1   |
| GeneCards | Neutrophil extracellular trap formation | PLCG1  |
| GeneCards | Neutrophil extracellular trap formation | MED4   |
| GeneCards | Neutrophil extracellular trap formation | ANXA2  |
| GeneCards | Neutrophil extracellular trap formation | CD38   |
| GeneCards | Neutrophil extracellular trap formation | ADORA3 |
| GeneCards | Neutrophil extracellular trap formation | CAMK2G |

|           |                                         |           |
|-----------|-----------------------------------------|-----------|
| GeneCards | Neutrophil extracellular trap formation | GATA1     |
| GeneCards | Neutrophil extracellular trap formation | HTRA1     |
| GeneCards | Neutrophil extracellular trap formation | TNFRSF11B |
| GeneCards | Neutrophil extracellular trap formation | PRKCB     |
| GeneCards | Neutrophil extracellular trap formation | QSOX1     |
| GeneCards | Neutrophil extracellular trap formation | MIR106B   |
| GeneCards | Neutrophil extracellular trap formation | CD209     |
| GeneCards | Neutrophil extracellular trap formation | SLC2A1    |
| GeneCards | Neutrophil extracellular trap formation | IRAK1     |
| GeneCards | Neutrophil extracellular trap formation | CCL23     |
| GeneCards | Neutrophil extracellular trap formation | SLC44A2   |
| GeneCards | Neutrophil extracellular trap formation | MYH6      |
| GeneCards | Neutrophil extracellular trap formation | F2RL3     |
| GeneCards | Neutrophil extracellular trap formation | ADAMTSL4  |
| GeneCards | Neutrophil extracellular trap formation | PMM2      |
| GeneCards | Neutrophil extracellular trap formation | CFHR1     |
| GeneCards | Neutrophil extracellular trap formation | P3H1      |
| GeneCards | Neutrophil extracellular trap formation | PRDX1     |
| GeneCards | Neutrophil extracellular trap formation | EPHA3     |
| GeneCards | Neutrophil extracellular trap formation | CALCA     |
| GeneCards | Neutrophil extracellular trap formation | RTN4      |
| GeneCards | Neutrophil extracellular trap formation | CRYAB     |

|           |                                         |         |
|-----------|-----------------------------------------|---------|
| GeneCards | Neutrophil extracellular trap formation | MT-CYB  |
| GeneCards | Neutrophil extracellular trap formation | KRT10   |
| GeneCards | Neutrophil extracellular trap formation | LCP1    |
| GeneCards | Neutrophil extracellular trap formation | SDC2    |
| GeneCards | Neutrophil extracellular trap formation | IGF1R   |
| GeneCards | Neutrophil extracellular trap formation | SLC35A1 |
| GeneCards | Neutrophil extracellular trap formation | PIGR    |
| GeneCards | Neutrophil extracellular trap formation | RET     |
| GeneCards | Neutrophil extracellular trap formation | ACTN1   |
| GeneCards | Neutrophil extracellular trap formation | MATN2   |
| GeneCards | Neutrophil extracellular trap formation | MB      |
| GeneCards | Neutrophil extracellular trap formation | LPP     |
| GeneCards | Neutrophil extracellular trap formation | CD59    |
| GeneCards | Neutrophil extracellular trap formation | DNMT1   |
| GeneCards | Neutrophil extracellular trap formation | AP3D1   |
| GeneCards | Neutrophil extracellular trap formation | BCL2L1  |
| GeneCards | Neutrophil extracellular trap formation | AK2     |
| GeneCards | Neutrophil extracellular trap formation | MERTK   |
| GeneCards | Neutrophil extracellular trap formation | NTRK1   |
| GeneCards | Neutrophil extracellular trap formation | SLC9A1  |
| GeneCards | Neutrophil extracellular trap formation | PRG3    |
| GeneCards | Neutrophil extracellular trap formation | LOXL4   |

|           |                                         |          |
|-----------|-----------------------------------------|----------|
| GeneCards | Neutrophil extracellular trap formation | PGLYRP1  |
| GeneCards | Neutrophil extracellular trap formation | OLR1     |
| GeneCards | Neutrophil extracellular trap formation | RPS6KB1  |
| GeneCards | Neutrophil extracellular trap formation | VIP      |
| GeneCards | Neutrophil extracellular trap formation | BIRC3    |
| GeneCards | Neutrophil extracellular trap formation | THPO     |
| GeneCards | Neutrophil extracellular trap formation | MATN4    |
| GeneCards | Neutrophil extracellular trap formation | MIR21    |
| GeneCards | Neutrophil extracellular trap formation | PLEK     |
| GeneCards | Neutrophil extracellular trap formation | ADAMTS17 |
| GeneCards | Neutrophil extracellular trap formation | CUBN     |
| GeneCards | Neutrophil extracellular trap formation | LYZ      |
| GeneCards | Neutrophil extracellular trap formation | CPQ      |
| GeneCards | Neutrophil extracellular trap formation | GPI      |
| GeneCards | Neutrophil extracellular trap formation | STIM1    |
| GeneCards | Neutrophil extracellular trap formation | TONSL    |
| GeneCards | Neutrophil extracellular trap formation | ANXA3    |
| GeneCards | Neutrophil extracellular trap formation | ABCC1    |
| GeneCards | Neutrophil extracellular trap formation | CFAP20   |
| GeneCards | Neutrophil extracellular trap formation | GHR      |
| GeneCards | Neutrophil extracellular trap formation | CCL13    |
| GeneCards | Neutrophil extracellular trap formation | TPM1     |

|           |                                         |         |
|-----------|-----------------------------------------|---------|
| GeneCards | Neutrophil extracellular trap formation | TOM1L2  |
| GeneCards | Neutrophil extracellular trap formation | MYBPC3  |
| GeneCards | Neutrophil extracellular trap formation | FLRT2   |
| GeneCards | Neutrophil extracellular trap formation | SOCS3   |
| GeneCards | Neutrophil extracellular trap formation | PTPRJ   |
| GeneCards | Neutrophil extracellular trap formation | SDC4    |
| GeneCards | Neutrophil extracellular trap formation | CSN1S1  |
| GeneCards | Neutrophil extracellular trap formation | CCK     |
| GeneCards | Neutrophil extracellular trap formation | MOSPD2  |
| GeneCards | Neutrophil extracellular trap formation | ASAH1   |
| GeneCards | Neutrophil extracellular trap formation | PTHLH   |
| GeneCards | Neutrophil extracellular trap formation | PCNA    |
| GeneCards | Neutrophil extracellular trap formation | ADORA1  |
| GeneCards | Neutrophil extracellular trap formation | NBEAL2  |
| GeneCards | Neutrophil extracellular trap formation | HSPA8   |
| GeneCards | Neutrophil extracellular trap formation | ADAM15  |
| GeneCards | Neutrophil extracellular trap formation | ETS1    |
| GeneCards | Neutrophil extracellular trap formation | POMGNT2 |
| GeneCards | Neutrophil extracellular trap formation | IBSP    |
| GeneCards | Neutrophil extracellular trap formation | FOXP3   |
| GeneCards | Neutrophil extracellular trap formation | FBN3    |
| GeneCards | Neutrophil extracellular trap formation | LDHA    |

|           |                                         |        |
|-----------|-----------------------------------------|--------|
| GeneCards | Neutrophil extracellular trap formation | RIPK1  |
| GeneCards | Neutrophil extracellular trap formation | DEFB4A |
| GeneCards | Neutrophil extracellular trap formation | NLRC4  |
| GeneCards | Neutrophil extracellular trap formation | ADAM8  |
| GeneCards | Neutrophil extracellular trap formation | ELK1   |
| GeneCards | Neutrophil extracellular trap formation | MARCKS |
| GeneCards | Neutrophil extracellular trap formation | DKC1   |
| GeneCards | Neutrophil extracellular trap formation | PDPN   |
| GeneCards | Neutrophil extracellular trap formation | NFKBIB |
| GeneCards | Neutrophil extracellular trap formation | WNT5A  |
| GeneCards | Neutrophil extracellular trap formation | LRRK2  |
| GeneCards | Neutrophil extracellular trap formation | MAP3K5 |
| GeneCards | Neutrophil extracellular trap formation | IL1R2  |
| GeneCards | Neutrophil extracellular trap formation | CDK2   |
| GeneCards | Neutrophil extracellular trap formation | DES    |
| GeneCards | Neutrophil extracellular trap formation | MUC5B  |
| GeneCards | Neutrophil extracellular trap formation | GJA1   |
| GeneCards | Neutrophil extracellular trap formation | FCHO1  |
| GeneCards | Neutrophil extracellular trap formation | GLRA1  |
| GeneCards | Neutrophil extracellular trap formation | HABP2  |
| GeneCards | Neutrophil extracellular trap formation | FLRT3  |
| GeneCards | Neutrophil extracellular trap formation | CAPN2  |

|           |                                         |          |
|-----------|-----------------------------------------|----------|
| GeneCards | Neutrophil extracellular trap formation | LRP2     |
| GeneCards | Neutrophil extracellular trap formation | PNP      |
| GeneCards | Neutrophil extracellular trap formation | TNNT2    |
| GeneCards | Neutrophil extracellular trap formation | GFAP     |
| GeneCards | Neutrophil extracellular trap formation | MFGE8    |
| GeneCards | Neutrophil extracellular trap formation | CAV1     |
| GeneCards | Neutrophil extracellular trap formation | PTPRS    |
| GeneCards | Neutrophil extracellular trap formation | TNFSF13B |
| GeneCards | Neutrophil extracellular trap formation | SERPIND1 |
| GeneCards | Neutrophil extracellular trap formation | PTH      |
| GeneCards | Neutrophil extracellular trap formation | RAPGEF3  |
| GeneCards | Neutrophil extracellular trap formation | LRP8     |
| GeneCards | Neutrophil extracellular trap formation | LPL      |
| GeneCards | Neutrophil extracellular trap formation | PROC     |
| GeneCards | Neutrophil extracellular trap formation | YBX1     |
| GeneCards | Neutrophil extracellular trap formation | SCARB1   |
| GeneCards | Neutrophil extracellular trap formation | NOX1     |
| GeneCards | Neutrophil extracellular trap formation | DSG2     |
| GeneCards | Neutrophil extracellular trap formation | NFKBIE   |
| GeneCards | Neutrophil extracellular trap formation | PLCB1    |
| GeneCards | Neutrophil extracellular trap formation | CDH2     |
| GeneCards | Neutrophil extracellular trap formation | IFNA2    |

|           |                                         |         |
|-----------|-----------------------------------------|---------|
| GeneCards | Neutrophil extracellular trap formation | P2RY11  |
| GeneCards | Neutrophil extracellular trap formation | VAMP7   |
| GeneCards | Neutrophil extracellular trap formation | CD81    |
| GeneCards | Neutrophil extracellular trap formation | HSPA5   |
| GeneCards | Neutrophil extracellular trap formation | ADCYAP1 |
| GeneCards | Neutrophil extracellular trap formation | ISG15   |
| GeneCards | Neutrophil extracellular trap formation | MIR142  |
| GeneCards | Neutrophil extracellular trap formation | MSR1    |
| GeneCards | Neutrophil extracellular trap formation | DYNLT1  |
| GeneCards | Neutrophil extracellular trap formation | FYN     |
| GeneCards | Neutrophil extracellular trap formation | TLR1    |
| GeneCards | Neutrophil extracellular trap formation | RPL18   |
| GeneCards | Neutrophil extracellular trap formation | ST3GAL4 |
| GeneCards | Neutrophil extracellular trap formation | MAP2K2  |
| GeneCards | Neutrophil extracellular trap formation | IL23A   |
| GeneCards | Neutrophil extracellular trap formation | FGF1    |
| GeneCards | Neutrophil extracellular trap formation | JAK1    |
| GeneCards | Neutrophil extracellular trap formation | VDR     |
| GeneCards | Neutrophil extracellular trap formation | VASP    |
| GeneCards | Neutrophil extracellular trap formation | DUSP1   |
| GeneCards | Neutrophil extracellular trap formation | LYVE1   |
| GeneCards | Neutrophil extracellular trap formation | GNAI1   |



|           |                                         |          |
|-----------|-----------------------------------------|----------|
| GeneCards | Neutrophil extracellular trap formation | TRPV4    |
| GeneCards | Neutrophil extracellular trap formation | AGTR1    |
| GeneCards | Neutrophil extracellular trap formation | CDKN1B   |
| GeneCards | Neutrophil extracellular trap formation | CSF2RA   |
| GeneCards | Neutrophil extracellular trap formation | MAPK9    |
| GeneCards | Neutrophil extracellular trap formation | GPBAR1   |
| GeneCards | Neutrophil extracellular trap formation | BCL6     |
| GeneCards | Neutrophil extracellular trap formation | ERBB4    |
| GeneCards | Neutrophil extracellular trap formation | LAMC3    |
| GeneCards | Neutrophil extracellular trap formation | SLC46A1  |
| GeneCards | Neutrophil extracellular trap formation | MAP3K1   |
| GeneCards | Neutrophil extracellular trap formation | CCR7     |
| GeneCards | Neutrophil extracellular trap formation | CXCL14   |
| GeneCards | Neutrophil extracellular trap formation | CYP1B1   |
| GeneCards | Neutrophil extracellular trap formation | DUSP19   |
| GeneCards | Neutrophil extracellular trap formation | SERPINB5 |
| GeneCards | Neutrophil extracellular trap formation | C3AR1    |
| GeneCards | Neutrophil extracellular trap formation | ADAMTS13 |
| GeneCards | Neutrophil extracellular trap formation | ENG      |
| GeneCards | Neutrophil extracellular trap formation | GSTM1    |
| GeneCards | Neutrophil extracellular trap formation | SNAP23   |
| GeneCards | Neutrophil extracellular trap formation | CSNK2B   |

|           |                                         |         |
|-----------|-----------------------------------------|---------|
| GeneCards | Neutrophil extracellular trap formation | TNFRSF8 |
| GeneCards | Neutrophil extracellular trap formation | TYK2    |
| GeneCards | Neutrophil extracellular trap formation | ACHE    |
| GeneCards | Neutrophil extracellular trap formation | NCSTN   |
| GeneCards | Neutrophil extracellular trap formation | ABCA4   |
| GeneCards | Neutrophil extracellular trap formation | GLUL    |
| GeneCards | Neutrophil extracellular trap formation | MMRN1   |
| GeneCards | Neutrophil extracellular trap formation | LAIR1   |
| GeneCards | Neutrophil extracellular trap formation | CHRNA7  |
| GeneCards | Neutrophil extracellular trap formation | FOXO3   |
| GeneCards | Neutrophil extracellular trap formation | NFKB2   |
| GeneCards | Neutrophil extracellular trap formation | IL36G   |
| GeneCards | Neutrophil extracellular trap formation | IL7     |
| GeneCards | Neutrophil extracellular trap formation | ADK     |
| GeneCards | Neutrophil extracellular trap formation | MIR126  |
| GeneCards | Neutrophil extracellular trap formation | CD33    |
| GeneCards | Neutrophil extracellular trap formation | CFL1    |
| GeneCards | Neutrophil extracellular trap formation | CCL22   |
| GeneCards | Neutrophil extracellular trap formation | KMT2A   |
| GeneCards | Neutrophil extracellular trap formation | PZP     |
| GeneCards | Neutrophil extracellular trap formation | RAP1B   |
| GeneCards | Neutrophil extracellular trap formation | ACTA1   |

|           |                                         |         |
|-----------|-----------------------------------------|---------|
| GeneCards | Neutrophil extracellular trap formation | GIN1    |
| GeneCards | Neutrophil extracellular trap formation | SORT1   |
| GeneCards | Neutrophil extracellular trap formation | AGA     |
| GeneCards | Neutrophil extracellular trap formation | F13A1   |
| GeneCards | Neutrophil extracellular trap formation | LRRC8A  |
| GeneCards | Neutrophil extracellular trap formation | ILK     |
| GeneCards | Neutrophil extracellular trap formation | PGM3    |
| GeneCards | Neutrophil extracellular trap formation | CREBBP  |
| GeneCards | Neutrophil extracellular trap formation | BCAN    |
| GeneCards | Neutrophil extracellular trap formation | RECK    |
| GeneCards | Neutrophil extracellular trap formation | CSF1R   |
| GeneCards | Neutrophil extracellular trap formation | EPOR    |
| GeneCards | Neutrophil extracellular trap formation | MAP3K7  |
| GeneCards | Neutrophil extracellular trap formation | ADGRG1  |
| GeneCards | Neutrophil extracellular trap formation | COX5A   |
| GeneCards | Neutrophil extracellular trap formation | DHFR    |
| GeneCards | Neutrophil extracellular trap formation | RUNX2   |
| GeneCards | Neutrophil extracellular trap formation | OGN     |
| GeneCards | Neutrophil extracellular trap formation | ANGPTL4 |
| GeneCards | Neutrophil extracellular trap formation | SDHA    |
| GeneCards | Neutrophil extracellular trap formation | CAPNS1  |
| GeneCards | Neutrophil extracellular trap formation | TXNRD2  |

|           |                                         |        |
|-----------|-----------------------------------------|--------|
| GeneCards | Neutrophil extracellular trap formation | NUMA1  |
| GeneCards | Neutrophil extracellular trap formation | MBP    |
| GeneCards | Neutrophil extracellular trap formation | PDGFRA |
| GeneCards | Neutrophil extracellular trap formation | APEX1  |
| GeneCards | Neutrophil extracellular trap formation | SNCA   |
| GeneCards | Neutrophil extracellular trap formation | CD80   |
| GeneCards | Neutrophil extracellular trap formation | SOX9   |
| GeneCards | Neutrophil extracellular trap formation | RPS24  |
| GeneCards | Neutrophil extracellular trap formation | F2RL2  |
| GeneCards | Neutrophil extracellular trap formation | CX3CR1 |
| GeneCards | Neutrophil extracellular trap formation | PCOLCE |
| GeneCards | Neutrophil extracellular trap formation | TPP2   |
| GeneCards | Neutrophil extracellular trap formation | LAMP1  |
| GeneCards | Neutrophil extracellular trap formation | JAK3   |
| GeneCards | Neutrophil extracellular trap formation | P2RY12 |
| GeneCards | Neutrophil extracellular trap formation | IL22   |
| GeneCards | Neutrophil extracellular trap formation | CFP    |
| GeneCards | Neutrophil extracellular trap formation | MDM2   |
| GeneCards | Neutrophil extracellular trap formation | LMNB1  |
| GeneCards | Neutrophil extracellular trap formation | MBL2   |
| GeneCards | Neutrophil extracellular trap formation | TDRD7  |
| GeneCards | Neutrophil extracellular trap formation | IL2RG  |

|           |                                         |         |
|-----------|-----------------------------------------|---------|
| GeneCards | Neutrophil extracellular trap formation | PRL     |
| GeneCards | Neutrophil extracellular trap formation | ZBP1    |
| GeneCards | Neutrophil extracellular trap formation | ABCG2   |
| GeneCards | Neutrophil extracellular trap formation | CSNK2A1 |
| GeneCards | Neutrophil extracellular trap formation | AKR1B1  |
| GeneCards | Neutrophil extracellular trap formation | ENPP1   |
| GeneCards | Neutrophil extracellular trap formation | PSMD3   |
| GeneCards | Neutrophil extracellular trap formation | NQO1    |
| GeneCards | Neutrophil extracellular trap formation | IGF2    |
| GeneCards | Neutrophil extracellular trap formation | OPRM1   |
| GeneCards | Neutrophil extracellular trap formation | VAMP2   |
| GeneCards | Neutrophil extracellular trap formation | MKLN1   |
| GeneCards | Neutrophil extracellular trap formation | ACTN4   |
| GeneCards | Neutrophil extracellular trap formation | GH1     |
| GeneCards | Neutrophil extracellular trap formation | TGFBR3  |
| GeneCards | Neutrophil extracellular trap formation | IL11    |
| GeneCards | Neutrophil extracellular trap formation | RPL31   |
| GeneCards | Neutrophil extracellular trap formation | HSPD1   |
| GeneCards | Neutrophil extracellular trap formation | BACE1   |
| GeneCards | Neutrophil extracellular trap formation | CKLF    |
| GeneCards | Neutrophil extracellular trap formation | SGCB    |
| GeneCards | Neutrophil extracellular trap formation | DUSP6   |

|           |                                         |         |
|-----------|-----------------------------------------|---------|
| GeneCards | Neutrophil extracellular trap formation | H2AC18  |
| GeneCards | Neutrophil extracellular trap formation | CANX    |
| GeneCards | Neutrophil extracellular trap formation | HELLS   |
| GeneCards | Neutrophil extracellular trap formation | CLEC6A  |
| GeneCards | Neutrophil extracellular trap formation | CDK4    |
| GeneCards | Neutrophil extracellular trap formation | G6PC1   |
| GeneCards | Neutrophil extracellular trap formation | HLA-C   |
| GeneCards | Neutrophil extracellular trap formation | AMELX   |
| GeneCards | Neutrophil extracellular trap formation | GGT1    |
| GeneCards | Neutrophil extracellular trap formation | RPL26   |
| GeneCards | Neutrophil extracellular trap formation | ALPP    |
| GeneCards | Neutrophil extracellular trap formation | IL4R    |
| GeneCards | Neutrophil extracellular trap formation | CILP    |
| GeneCards | Neutrophil extracellular trap formation | EMCN    |
| GeneCards | Neutrophil extracellular trap formation | ARHGEF2 |
| GeneCards | Neutrophil extracellular trap formation | COPA    |
| GeneCards | Neutrophil extracellular trap formation | PLPP6   |
| GeneCards | Neutrophil extracellular trap formation | MAP2K6  |
| GeneCards | Neutrophil extracellular trap formation | GUCY2C  |
| GeneCards | Neutrophil extracellular trap formation | FGF7    |
| GeneCards | Neutrophil extracellular trap formation | PLEC    |
| GeneCards | Neutrophil extracellular trap formation | LPO     |

|           |                                         |          |
|-----------|-----------------------------------------|----------|
| GeneCards | Neutrophil extracellular trap formation | AR       |
| GeneCards | Neutrophil extracellular trap formation | TGIF1    |
| GeneCards | Neutrophil extracellular trap formation | CEACAM5  |
| GeneCards | Neutrophil extracellular trap formation | DEFA5    |
| GeneCards | Neutrophil extracellular trap formation | DNAH8    |
| GeneCards | Neutrophil extracellular trap formation | BAK1     |
| GeneCards | Neutrophil extracellular trap formation | EMILIN3  |
| GeneCards | Neutrophil extracellular trap formation | PDGFB    |
| GeneCards | Neutrophil extracellular trap formation | CD9      |
| GeneCards | Neutrophil extracellular trap formation | BCAR1    |
| GeneCards | Neutrophil extracellular trap formation | CCL17    |
| GeneCards | Neutrophil extracellular trap formation | LGALS3BP |
| GeneCards | Neutrophil extracellular trap formation | SEC61A1  |
| GeneCards | Neutrophil extracellular trap formation | CRH      |
| GeneCards | Neutrophil extracellular trap formation | STOM     |
| GeneCards | Neutrophil extracellular trap formation | REL      |
| GeneCards | Neutrophil extracellular trap formation | FGFR4    |
| GeneCards | Neutrophil extracellular trap formation | EPRS1    |
| GeneCards | Neutrophil extracellular trap formation | THRAP3   |
| GeneCards | Neutrophil extracellular trap formation | SQSTM1   |
| GeneCards | Neutrophil extracellular trap formation | CNR2     |
| GeneCards | Neutrophil extracellular trap formation | YWHAE    |

|           |                                         |           |
|-----------|-----------------------------------------|-----------|
| GeneCards | Neutrophil extracellular trap formation | FNIP1     |
| GeneCards | Neutrophil extracellular trap formation | IDH1      |
| GeneCards | Neutrophil extracellular trap formation | FGFR3     |
| GeneCards | Neutrophil extracellular trap formation | FGB       |
| GeneCards | Neutrophil extracellular trap formation | YWHAZ     |
| GeneCards | Neutrophil extracellular trap formation | TNFRSF10B |
| GeneCards | Neutrophil extracellular trap formation | HAS3      |
| GeneCards | Neutrophil extracellular trap formation | LAMP2     |
| GeneCards | Neutrophil extracellular trap formation | HEY2      |
| GeneCards | Neutrophil extracellular trap formation | RPS27     |
| GeneCards | Neutrophil extracellular trap formation | CLEC11A   |
| GeneCards | Neutrophil extracellular trap formation | TINAGL1   |
| GeneCards | Neutrophil extracellular trap formation | ANKRD17   |
| GeneCards | Neutrophil extracellular trap formation | POR       |
| GeneCards | Neutrophil extracellular trap formation | MRC2      |
| GeneCards | Neutrophil extracellular trap formation | MPP1      |
| GeneCards | Neutrophil extracellular trap formation | TCN2      |
| GeneCards | Neutrophil extracellular trap formation | CNR1      |
| GeneCards | Neutrophil extracellular trap formation | KIRREL3   |
| GeneCards | Neutrophil extracellular trap formation | FTH1      |
| GeneCards | Neutrophil extracellular trap formation | NF1       |
| GeneCards | Neutrophil extracellular trap formation | IRS1      |



|           |                                         |           |
|-----------|-----------------------------------------|-----------|
| GeneCards | Neutrophil extracellular trap formation | RPL11     |
| GeneCards | Neutrophil extracellular trap formation | TRAP1     |
| GeneCards | Neutrophil extracellular trap formation | KRT1      |
| GeneCards | Neutrophil extracellular trap formation | CD46      |
| GeneCards | Neutrophil extracellular trap formation | TNFRSF10C |
| GeneCards | Neutrophil extracellular trap formation | AQP4      |
| GeneCards | Neutrophil extracellular trap formation | GPNMB     |
| GeneCards | Neutrophil extracellular trap formation | IL9       |
| GeneCards | Neutrophil extracellular trap formation | STXBP3    |
| GeneCards | Neutrophil extracellular trap formation | BCL2A1    |
| GeneCards | Neutrophil extracellular trap formation | STK4      |
| GeneCards | Neutrophil extracellular trap formation | ANAPC1    |
| GeneCards | Neutrophil extracellular trap formation | HDGF      |
| GeneCards | Neutrophil extracellular trap formation | LEF1      |
| GeneCards | Neutrophil extracellular trap formation | ADORA2B   |
| GeneCards | Neutrophil extracellular trap formation | LEPR      |
| GeneCards | Neutrophil extracellular trap formation | SIGLEC9   |
| GeneCards | Neutrophil extracellular trap formation | DNMT3B    |
| GeneCards | Neutrophil extracellular trap formation | TSHR      |
| GeneCards | Neutrophil extracellular trap formation | SLIT1     |
| GeneCards | Neutrophil extracellular trap formation | EMD       |
| GeneCards | Neutrophil extracellular trap formation | NOTCH2    |

|           |                                         |         |
|-----------|-----------------------------------------|---------|
| GeneCards | Neutrophil extracellular trap formation | CSPG4   |
| GeneCards | Neutrophil extracellular trap formation | ANTXR1  |
| GeneCards | Neutrophil extracellular trap formation | IRF2BP2 |
| GeneCards | Neutrophil extracellular trap formation | GSTP1   |
| GeneCards | Neutrophil extracellular trap formation | LIG4    |
| GeneCards | Neutrophil extracellular trap formation | YWHAQ   |
| GeneCards | Neutrophil extracellular trap formation | FCER2   |
| GeneCards | Neutrophil extracellular trap formation | MECOM   |
| GeneCards | Neutrophil extracellular trap formation | NFATC1  |
| GeneCards | Neutrophil extracellular trap formation | RPL15   |
| GeneCards | Neutrophil extracellular trap formation | KLKB1   |
| GeneCards | Neutrophil extracellular trap formation | PDGFA   |
| GeneCards | Neutrophil extracellular trap formation | PTH1R   |
| GeneCards | Neutrophil extracellular trap formation | SLAMF1  |
| GeneCards | Neutrophil extracellular trap formation | CXCR3   |
| GeneCards | Neutrophil extracellular trap formation | TMPRSS6 |
| GeneCards | Neutrophil extracellular trap formation | ACKR3   |
| GeneCards | Neutrophil extracellular trap formation | CHRNA2  |
| GeneCards | Neutrophil extracellular trap formation | MED20   |
| GeneCards | Neutrophil extracellular trap formation | FICD    |
| GeneCards | Neutrophil extracellular trap formation | CISH    |
| GeneCards | Neutrophil extracellular trap formation | DDX3X   |

|           |                                         |          |
|-----------|-----------------------------------------|----------|
| GeneCards | Neutrophil extracellular trap formation | KIAA1217 |
| GeneCards | Neutrophil extracellular trap formation | SEMA6A   |
| GeneCards | Neutrophil extracellular trap formation | THSD4    |
| GeneCards | Neutrophil extracellular trap formation | ENO2     |
| GeneCards | Neutrophil extracellular trap formation | PNOC     |
| GeneCards | Neutrophil extracellular trap formation | SERPINH1 |
| GeneCards | Neutrophil extracellular trap formation | CDK5     |
| GeneCards | Neutrophil extracellular trap formation | AIM2     |
| GeneCards | Neutrophil extracellular trap formation | PPIB     |
| GeneCards | Neutrophil extracellular trap formation | PTPRA    |
| GeneCards | Neutrophil extracellular trap formation | CCL19    |
| GeneCards | Neutrophil extracellular trap formation | BID      |
| GeneCards | Neutrophil extracellular trap formation | RPS26    |
| GeneCards | Neutrophil extracellular trap formation | DST      |
| GeneCards | Neutrophil extracellular trap formation | CD19     |
| GeneCards | Neutrophil extracellular trap formation | RBM20    |
| GeneCards | Neutrophil extracellular trap formation | TSG101   |
| GeneCards | Neutrophil extracellular trap formation | PTPRU    |
| GeneCards | Neutrophil extracellular trap formation | ALCAM    |
| GeneCards | Neutrophil extracellular trap formation | NR4A3    |
| GeneCards | Neutrophil extracellular trap formation | CD93     |
| GeneCards | Neutrophil extracellular trap formation | MIR125A  |

|           |                                         |         |
|-----------|-----------------------------------------|---------|
| GeneCards | Neutrophil extracellular trap formation | FTL     |
| GeneCards | Neutrophil extracellular trap formation | CSTB    |
| GeneCards | Neutrophil extracellular trap formation | TUBB    |
| GeneCards | Neutrophil extracellular trap formation | IGFBP3  |
| GeneCards | Neutrophil extracellular trap formation | LDLR    |
| GeneCards | Neutrophil extracellular trap formation | BAD     |
| GeneCards | Neutrophil extracellular trap formation | PLOD3   |
| GeneCards | Neutrophil extracellular trap formation | FERMT1  |
| GeneCards | Neutrophil extracellular trap formation | FGG     |
| GeneCards | Neutrophil extracellular trap formation | HBG2    |
| GeneCards | Neutrophil extracellular trap formation | RPS10   |
| GeneCards | Neutrophil extracellular trap formation | DSG1    |
| GeneCards | Neutrophil extracellular trap formation | CAPN3   |
| GeneCards | Neutrophil extracellular trap formation | TLR8    |
| GeneCards | Neutrophil extracellular trap formation | HPRT1   |
| GeneCards | Neutrophil extracellular trap formation | GLB1    |
| GeneCards | Neutrophil extracellular trap formation | SPOCK2  |
| GeneCards | Neutrophil extracellular trap formation | PLN     |
| GeneCards | Neutrophil extracellular trap formation | CYSLTR2 |
| GeneCards | Neutrophil extracellular trap formation | MED18   |
| GeneCards | Neutrophil extracellular trap formation | PDCD6IP |
| GeneCards | Neutrophil extracellular trap formation | RBSN    |

|           |                                         |        |
|-----------|-----------------------------------------|--------|
| GeneCards | Neutrophil extracellular trap formation | GRK2   |
| GeneCards | Neutrophil extracellular trap formation | VEGFC  |
| GeneCards | Neutrophil extracellular trap formation | CD151  |
| GeneCards | Neutrophil extracellular trap formation | RACK1  |
| GeneCards | Neutrophil extracellular trap formation | LRP4   |
| GeneCards | Neutrophil extracellular trap formation | FLOT1  |
| GeneCards | Neutrophil extracellular trap formation | CD163  |
| GeneCards | Neutrophil extracellular trap formation | CLDN1  |
| GeneCards | Neutrophil extracellular trap formation | ORM1   |
| GeneCards | Neutrophil extracellular trap formation | GPC6   |
| GeneCards | Neutrophil extracellular trap formation | DOCK2  |
| GeneCards | Neutrophil extracellular trap formation | GLG1   |
| GeneCards | Neutrophil extracellular trap formation | CRK    |
| GeneCards | Neutrophil extracellular trap formation | PGF    |
| GeneCards | Neutrophil extracellular trap formation | PDPK1  |
| GeneCards | Neutrophil extracellular trap formation | HLA-G  |
| GeneCards | Neutrophil extracellular trap formation | BDKRB2 |
| GeneCards | Neutrophil extracellular trap formation | SMPD1  |
| GeneCards | Neutrophil extracellular trap formation | KAT5   |
| GeneCards | Neutrophil extracellular trap formation | TRAF6  |
| GeneCards | Neutrophil extracellular trap formation | TPSAB1 |
| GeneCards | Neutrophil extracellular trap formation | HAPLN3 |

|           |                                         |          |
|-----------|-----------------------------------------|----------|
| GeneCards | Neutrophil extracellular trap formation | PRNP     |
| GeneCards | Neutrophil extracellular trap formation | JAML     |
| GeneCards | Neutrophil extracellular trap formation | CDKN2A   |
| GeneCards | Neutrophil extracellular trap formation | HTT      |
| GeneCards | Neutrophil extracellular trap formation | MIR199A1 |
| GeneCards | Neutrophil extracellular trap formation | GPR84    |
| GeneCards | Neutrophil extracellular trap formation | TCF12    |
| GeneCards | Neutrophil extracellular trap formation | JUP      |
| GeneCards | Neutrophil extracellular trap formation | PTPA     |
| GeneCards | Neutrophil extracellular trap formation | PSMC6    |
| GeneCards | Neutrophil extracellular trap formation | GRIN1    |
| GeneCards | Neutrophil extracellular trap formation | A2ML1    |
| GeneCards | Neutrophil extracellular trap formation | TPI1     |
| GeneCards | Neutrophil extracellular trap formation | RARRES2  |
| GeneCards | Neutrophil extracellular trap formation | SOCS1    |
| GeneCards | Neutrophil extracellular trap formation | BDNF     |
| GeneCards | Neutrophil extracellular trap formation | ZAP70    |
| GeneCards | Neutrophil extracellular trap formation | HAVCR1   |
| GeneCards | Neutrophil extracellular trap formation | CCN3     |
| GeneCards | Neutrophil extracellular trap formation | DOLK     |
| GeneCards | Neutrophil extracellular trap formation | SERPINF1 |
| GeneCards | Neutrophil extracellular trap formation | SFTPB    |

|           |                                         |        |
|-----------|-----------------------------------------|--------|
| GeneCards | Neutrophil extracellular trap formation | KAT6B  |
| GeneCards | Neutrophil extracellular trap formation | PIN1   |
| GeneCards | Neutrophil extracellular trap formation | IL32   |
| GeneCards | Neutrophil extracellular trap formation | GNB1   |
| GeneCards | Neutrophil extracellular trap formation | KCNMA1 |
| GeneCards | Neutrophil extracellular trap formation | MTHFR  |
| GeneCards | Neutrophil extracellular trap formation | ACVRL1 |
| GeneCards | Neutrophil extracellular trap formation | FOXC1  |
| GeneCards | Neutrophil extracellular trap formation | CLC    |
| GeneCards | Neutrophil extracellular trap formation | TNNI3  |
| GeneCards | Neutrophil extracellular trap formation | LEMD2  |
| GeneCards | Neutrophil extracellular trap formation | IGF2R  |
| GeneCards | Neutrophil extracellular trap formation | DDX20  |
| GeneCards | Neutrophil extracellular trap formation | TEC    |
| GeneCards | Neutrophil extracellular trap formation | CD8A   |
| GeneCards | Neutrophil extracellular trap formation | KCNJ5  |
| GeneCards | Neutrophil extracellular trap formation | S100A7 |
| GeneCards | Neutrophil extracellular trap formation | PFAS   |
| GeneCards | Neutrophil extracellular trap formation | AGK    |
| GeneCards | Neutrophil extracellular trap formation | BAG3   |
| GeneCards | Neutrophil extracellular trap formation | CHRNA4 |
| GeneCards | Neutrophil extracellular trap formation | CTNNA1 |

|           |                                         |         |
|-----------|-----------------------------------------|---------|
| GeneCards | Neutrophil extracellular trap formation | CCR4    |
| GeneCards | Neutrophil extracellular trap formation | NOG     |
| GeneCards | Neutrophil extracellular trap formation | ZBTB16  |
| GeneCards | Neutrophil extracellular trap formation | NATD1   |
| GeneCards | Neutrophil extracellular trap formation | RPS27A  |
| GeneCards | Neutrophil extracellular trap formation | FGF23   |
| GeneCards | Neutrophil extracellular trap formation | EGLN3   |
| GeneCards | Neutrophil extracellular trap formation | PFKM    |
| GeneCards | Neutrophil extracellular trap formation | MMP28   |
| GeneCards | Neutrophil extracellular trap formation | CTTN    |
| GeneCards | Neutrophil extracellular trap formation | CORO1A  |
| GeneCards | Neutrophil extracellular trap formation | TBL1XR1 |
| GeneCards | Neutrophil extracellular trap formation | VANGL2  |
| GeneCards | Neutrophil extracellular trap formation | IFNB1   |
| GeneCards | Neutrophil extracellular trap formation | ERCC3   |
| GeneCards | Neutrophil extracellular trap formation | NTN1    |
| GeneCards | Neutrophil extracellular trap formation | ANGPTL7 |
| GeneCards | Neutrophil extracellular trap formation | TARS1   |
| GeneCards | Neutrophil extracellular trap formation | DRD2    |
| GeneCards | Neutrophil extracellular trap formation | CTNND1  |
| GeneCards | Neutrophil extracellular trap formation | CDK1    |
| GeneCards | Neutrophil extracellular trap formation | IGFBP5  |



|           |                                         |         |
|-----------|-----------------------------------------|---------|
| GeneCards | Neutrophil extracellular trap formation | ADAMTS6 |
| GeneCards | Neutrophil extracellular trap formation | TNFSF12 |
| GeneCards | Neutrophil extracellular trap formation | CCL18   |
| GeneCards | Neutrophil extracellular trap formation | CD200   |
| GeneCards | Neutrophil extracellular trap formation | ATG7    |
| GeneCards | Neutrophil extracellular trap formation | BLZF1   |
| GeneCards | Neutrophil extracellular trap formation | NR3C2   |
| GeneCards | Neutrophil extracellular trap formation | EDN3    |
| GeneCards | Neutrophil extracellular trap formation | F10     |
| GeneCards | Neutrophil extracellular trap formation | ASIC1   |
| GeneCards | Neutrophil extracellular trap formation | RAB5A   |
| GeneCards | Neutrophil extracellular trap formation | ADAM12  |
| GeneCards | Neutrophil extracellular trap formation | RPL27   |
| GeneCards | Neutrophil extracellular trap formation | RPS15A  |
| GeneCards | Neutrophil extracellular trap formation | CREG1   |
| GeneCards | Neutrophil extracellular trap formation | PGD     |
| GeneCards | Neutrophil extracellular trap formation | ERAP1   |
| GeneCards | Neutrophil extracellular trap formation | ATP6AP2 |
| GeneCards | Neutrophil extracellular trap formation | HDAC9   |
| GeneCards | Neutrophil extracellular trap formation | GJB6    |
| GeneCards | Neutrophil extracellular trap formation | NPY     |
| GeneCards | Neutrophil extracellular trap formation | ACE2    |

|           |                                         |         |
|-----------|-----------------------------------------|---------|
| GeneCards | Neutrophil extracellular trap formation | MEG3    |
| GeneCards | Neutrophil extracellular trap formation | LRBA    |
| GeneCards | Neutrophil extracellular trap formation | ITGB7   |
| GeneCards | Neutrophil extracellular trap formation | ITCH    |
| GeneCards | Neutrophil extracellular trap formation | PADI2   |
| GeneCards | Neutrophil extracellular trap formation | SETD2   |
| GeneCards | Neutrophil extracellular trap formation | UBASH3B |
| GeneCards | Neutrophil extracellular trap formation | COMT    |
| GeneCards | Neutrophil extracellular trap formation | XPO1    |
| GeneCards | Neutrophil extracellular trap formation | APOA2   |
| GeneCards | Neutrophil extracellular trap formation | POMT1   |
| GeneCards | Neutrophil extracellular trap formation | SCRIB   |
| GeneCards | Neutrophil extracellular trap formation | VAV3    |
| GeneCards | Neutrophil extracellular trap formation | DNM2    |
| GeneCards | Neutrophil extracellular trap formation | RB1     |
| GeneCards | Neutrophil extracellular trap formation | RPSA    |
| GeneCards | Neutrophil extracellular trap formation | B4GALT1 |
| GeneCards | Neutrophil extracellular trap formation | CHRM3   |
| GeneCards | Neutrophil extracellular trap formation | CXCL16  |
| GeneCards | Neutrophil extracellular trap formation | SSC5D   |
| GeneCards | Neutrophil extracellular trap formation | SLC6A3  |
| GeneCards | Neutrophil extracellular trap formation | PPIA    |

|           |                                         |          |
|-----------|-----------------------------------------|----------|
| GeneCards | Neutrophil extracellular trap formation | PSAP     |
| GeneCards | Neutrophil extracellular trap formation | HRG      |
| GeneCards | Neutrophil extracellular trap formation | BAG6     |
| GeneCards | Neutrophil extracellular trap formation | S1PR1    |
| GeneCards | Neutrophil extracellular trap formation | TAPBP    |
| GeneCards | Neutrophil extracellular trap formation | NDE1     |
| GeneCards | Neutrophil extracellular trap formation | PARD3    |
| GeneCards | Neutrophil extracellular trap formation | PODN     |
| GeneCards | Neutrophil extracellular trap formation | MIR9-1   |
| GeneCards | Neutrophil extracellular trap formation | ERBB3    |
| GeneCards | Neutrophil extracellular trap formation | PFKFB3   |
| GeneCards | Neutrophil extracellular trap formation | TCF3     |
| GeneCards | Neutrophil extracellular trap formation | NPR1     |
| GeneCards | Neutrophil extracellular trap formation | ENPP6    |
| GeneCards | Neutrophil extracellular trap formation | TBXT     |
| GeneCards | Neutrophil extracellular trap formation | MTR      |
| GeneCards | Neutrophil extracellular trap formation | COLGALT1 |
| GeneCards | Neutrophil extracellular trap formation | DACT1    |
| GeneCards | Neutrophil extracellular trap formation | APOB     |
| GeneCards | Neutrophil extracellular trap formation | CCL8     |
| GeneCards | Neutrophil extracellular trap formation | NPR2     |
| GeneCards | Neutrophil extracellular trap formation | SYNE2    |

|           |                                         |          |
|-----------|-----------------------------------------|----------|
| GeneCards | Neutrophil extracellular trap formation | F12      |
| GeneCards | Neutrophil extracellular trap formation | UXT      |
| GeneCards | Neutrophil extracellular trap formation | TOM1     |
| GeneCards | Neutrophil extracellular trap formation | OMD      |
| GeneCards | Neutrophil extracellular trap formation | XXYLT1   |
| GeneCards | Neutrophil extracellular trap formation | STAT4    |
| GeneCards | Neutrophil extracellular trap formation | HMMR     |
| GeneCards | Neutrophil extracellular trap formation | MGAM     |
| GeneCards | Neutrophil extracellular trap formation | CXCL13   |
| GeneCards | Neutrophil extracellular trap formation | POLR2A   |
| GeneCards | Neutrophil extracellular trap formation | VANGL1   |
| GeneCards | Neutrophil extracellular trap formation | PTPN12   |
| GeneCards | Neutrophil extracellular trap formation | XRCC6    |
| GeneCards | Neutrophil extracellular trap formation | PRSS1    |
| GeneCards | Neutrophil extracellular trap formation | TLN2     |
| GeneCards | Neutrophil extracellular trap formation | VEGFB    |
| GeneCards | Neutrophil extracellular trap formation | MED13    |
| GeneCards | Neutrophil extracellular trap formation | HSP90AB1 |
| GeneCards | Neutrophil extracellular trap formation | CTHRC1   |
| GeneCards | Neutrophil extracellular trap formation | REN      |
| GeneCards | Neutrophil extracellular trap formation | PREP     |
| GeneCards | Neutrophil extracellular trap formation | CLDN5    |

|           |                                         |         |
|-----------|-----------------------------------------|---------|
| GeneCards | Neutrophil extracellular trap formation | HAVCR2  |
| GeneCards | Neutrophil extracellular trap formation | VCP     |
| GeneCards | Neutrophil extracellular trap formation | ARF6    |
| GeneCards | Neutrophil extracellular trap formation | FGFBP3  |
| GeneCards | Neutrophil extracellular trap formation | AHSG    |
| GeneCards | Neutrophil extracellular trap formation | TWSG1   |
| GeneCards | Neutrophil extracellular trap formation | TJP1    |
| GeneCards | Neutrophil extracellular trap formation | TNFSF13 |
| GeneCards | Neutrophil extracellular trap formation | ERN1    |
| GeneCards | Neutrophil extracellular trap formation | CDC25C  |
| GeneCards | Neutrophil extracellular trap formation | MMP27   |
| GeneCards | Neutrophil extracellular trap formation | ALDH2   |
| GeneCards | Neutrophil extracellular trap formation | ORAI1   |
| GeneCards | Neutrophil extracellular trap formation | CHIT1   |
| GeneCards | Neutrophil extracellular trap formation | FUT8    |
| GeneCards | Neutrophil extracellular trap formation | DLG4    |
| GeneCards | Neutrophil extracellular trap formation | SLC2A3  |
| GeneCards | Neutrophil extracellular trap formation | IL37    |
| GeneCards | Neutrophil extracellular trap formation | PIK3C2A |
| GeneCards | Neutrophil extracellular trap formation | KLF2    |
| GeneCards | Neutrophil extracellular trap formation | SCNN1B  |
| GeneCards | Neutrophil extracellular trap formation | HBB     |

|           |                                         |          |
|-----------|-----------------------------------------|----------|
| GeneCards | Neutrophil extracellular trap formation | SLC11A2  |
| GeneCards | Neutrophil extracellular trap formation | ITGB8    |
| GeneCards | Neutrophil extracellular trap formation | TFPI2    |
| GeneCards | Neutrophil extracellular trap formation | ICOSLG   |
| GeneCards | Neutrophil extracellular trap formation | BPIFA1   |
| GeneCards | Neutrophil extracellular trap formation | CASP2    |
| GeneCards | Neutrophil extracellular trap formation | P2RX2    |
| GeneCards | Neutrophil extracellular trap formation | PIKFYVE  |
| GeneCards | Neutrophil extracellular trap formation | WIPF1    |
| GeneCards | Neutrophil extracellular trap formation | GMDS     |
| GeneCards | Neutrophil extracellular trap formation | HLA-DQB1 |
| GeneCards | Neutrophil extracellular trap formation | GRIN2A   |
| GeneCards | Neutrophil extracellular trap formation | LPA      |
| GeneCards | Neutrophil extracellular trap formation | IL31RA   |
| GeneCards | Neutrophil extracellular trap formation | TSC2     |
| GeneCards | Neutrophil extracellular trap formation | TSLP     |
| GeneCards | Neutrophil extracellular trap formation | STX1A    |
| GeneCards | Neutrophil extracellular trap formation | PGK1     |
| GeneCards | Neutrophil extracellular trap formation | ILF3     |
| GeneCards | Neutrophil extracellular trap formation | IFNGR1   |
| GeneCards | Neutrophil extracellular trap formation | PLA2G10  |
| GeneCards | Neutrophil extracellular trap formation | NKX2-1   |

|           |                                         |         |
|-----------|-----------------------------------------|---------|
| GeneCards | Neutrophil extracellular trap formation | STING1  |
| GeneCards | Neutrophil extracellular trap formation | NTRK2   |
| GeneCards | Neutrophil extracellular trap formation | NOTCH3  |
| GeneCards | Neutrophil extracellular trap formation | SEMA4D  |
| GeneCards | Neutrophil extracellular trap formation | ADAM9   |
| GeneCards | Neutrophil extracellular trap formation | PDGFD   |
| GeneCards | Neutrophil extracellular trap formation | CALM1   |
| GeneCards | Neutrophil extracellular trap formation | ATP5F1A |
| GeneCards | Neutrophil extracellular trap formation | PRKCI   |
| GeneCards | Neutrophil extracellular trap formation | LY96    |
| GeneCards | Neutrophil extracellular trap formation | SEMA3E  |
| GeneCards | Neutrophil extracellular trap formation | LCK     |
| GeneCards | Neutrophil extracellular trap formation | MMACHC  |
| GeneCards | Neutrophil extracellular trap formation | NPR3    |
| GeneCards | Neutrophil extracellular trap formation | SNAP25  |
| GeneCards | Neutrophil extracellular trap formation | GLS     |
| GeneCards | Neutrophil extracellular trap formation | EIF4E   |
| GeneCards | Neutrophil extracellular trap formation | PLA2G7  |
| GeneCards | Neutrophil extracellular trap formation | IFI16   |
| GeneCards | Neutrophil extracellular trap formation | HK2     |
| GeneCards | Neutrophil extracellular trap formation | FCER1A  |
| GeneCards | Neutrophil extracellular trap formation | CFD     |

|           |                                         |          |
|-----------|-----------------------------------------|----------|
| GeneCards | Neutrophil extracellular trap formation | CCL26    |
| GeneCards | Neutrophil extracellular trap formation | OPRL1    |
| GeneCards | Neutrophil extracellular trap formation | CBS      |
| GeneCards | Neutrophil extracellular trap formation | ATG5     |
| GeneCards | Neutrophil extracellular trap formation | M6PR     |
| GeneCards | Neutrophil extracellular trap formation | MYB      |
| GeneCards | Neutrophil extracellular trap formation | HPX      |
| GeneCards | Neutrophil extracellular trap formation | PCCB     |
| GeneCards | Neutrophil extracellular trap formation | SAA4     |
| GeneCards | Neutrophil extracellular trap formation | TUBA1B   |
| GeneCards | Neutrophil extracellular trap formation | INHBA    |
| GeneCards | Neutrophil extracellular trap formation | STX3     |
| GeneCards | Neutrophil extracellular trap formation | BRCA1    |
| GeneCards | Neutrophil extracellular trap formation | CSNK2A2  |
| GeneCards | Neutrophil extracellular trap formation | P2RY14   |
| GeneCards | Neutrophil extracellular trap formation | APC      |
| GeneCards | Neutrophil extracellular trap formation | IL20     |
| GeneCards | Neutrophil extracellular trap formation | VDAC1    |
| GeneCards | Neutrophil extracellular trap formation | PCOLCE2  |
| GeneCards | Neutrophil extracellular trap formation | LTBR     |
| GeneCards | Neutrophil extracellular trap formation | NTS      |
| GeneCards | Neutrophil extracellular trap formation | ADAMTS12 |



|           |                                         |          |
|-----------|-----------------------------------------|----------|
| GeneCards | Neutrophil extracellular trap formation | ARF1     |
| GeneCards | Neutrophil extracellular trap formation | CD247    |
| GeneCards | Neutrophil extracellular trap formation | MAGT1    |
| GeneCards | Neutrophil extracellular trap formation | IKBKB    |
| GeneCards | Neutrophil extracellular trap formation | KMT5B    |
| GeneCards | Neutrophil extracellular trap formation | GRIN2B   |
| GeneCards | Neutrophil extracellular trap formation | PTGER2   |
| GeneCards | Neutrophil extracellular trap formation | JPH4     |
| GeneCards | Neutrophil extracellular trap formation | SMOC1    |
| GeneCards | Neutrophil extracellular trap formation | SMARCA4  |
| GeneCards | Neutrophil extracellular trap formation | GNA11    |
| GeneCards | Neutrophil extracellular trap formation | OLFML2A  |
| GeneCards | Neutrophil extracellular trap formation | RYR1     |
| GeneCards | Neutrophil extracellular trap formation | XRCC5    |
| GeneCards | Neutrophil extracellular trap formation | KLK3     |
| GeneCards | Neutrophil extracellular trap formation | ARHGAP35 |
| GeneCards | Neutrophil extracellular trap formation | IQGAP1   |
| GeneCards | Neutrophil extracellular trap formation | TYRO3    |
| GeneCards | Neutrophil extracellular trap formation | STAT6    |
| GeneCards | Neutrophil extracellular trap formation | ECE1     |
| GeneCards | Neutrophil extracellular trap formation | DDIT4    |
| GeneCards | Neutrophil extracellular trap formation | ADAMTS20 |

|           |                                         |        |
|-----------|-----------------------------------------|--------|
| GeneCards | Neutrophil extracellular trap formation | CGA    |
| GeneCards | Neutrophil extracellular trap formation | DDIT3  |
| GeneCards | Neutrophil extracellular trap formation | NABP1  |
| GeneCards | Neutrophil extracellular trap formation | RPN1   |
| GeneCards | Neutrophil extracellular trap formation | KL     |
| GeneCards | Neutrophil extracellular trap formation | PKHD1  |
| GeneCards | Neutrophil extracellular trap formation | OCLN   |
| GeneCards | Neutrophil extracellular trap formation | PRKDC  |
| GeneCards | Neutrophil extracellular trap formation | CDK9   |
| GeneCards | Neutrophil extracellular trap formation | KRT18  |
| GeneCards | Neutrophil extracellular trap formation | MIR143 |
| GeneCards | Neutrophil extracellular trap formation | PRKCE  |
| GeneCards | Neutrophil extracellular trap formation | SGCA   |
| GeneCards | Neutrophil extracellular trap formation | UTRN   |
| GeneCards | Neutrophil extracellular trap formation | THBS3  |
| GeneCards | Neutrophil extracellular trap formation | PAK2   |
| GeneCards | Neutrophil extracellular trap formation | CHAD   |
| GeneCards | Neutrophil extracellular trap formation | CRKL   |
| GeneCards | Neutrophil extracellular trap formation | MIR145 |
| GeneCards | Neutrophil extracellular trap formation | HAND2  |
| GeneCards | Neutrophil extracellular trap formation | ANKRD1 |
| GeneCards | Neutrophil extracellular trap formation | PRKACA |

|           |                                         |          |
|-----------|-----------------------------------------|----------|
| GeneCards | Neutrophil extracellular trap formation | ATP7A    |
| GeneCards | Neutrophil extracellular trap formation | VIT      |
| GeneCards | Neutrophil extracellular trap formation | SMN1     |
| GeneCards | Neutrophil extracellular trap formation | CSTA     |
| GeneCards | Neutrophil extracellular trap formation | ITGB5    |
| GeneCards | Neutrophil extracellular trap formation | FANCI    |
| GeneCards | Neutrophil extracellular trap formation | OLFML3   |
| GeneCards | Neutrophil extracellular trap formation | RAB10    |
| GeneCards | Neutrophil extracellular trap formation | TSPO     |
| GeneCards | Neutrophil extracellular trap formation | ID2      |
| GeneCards | Neutrophil extracellular trap formation | APLP1    |
| GeneCards | Neutrophil extracellular trap formation | HNRNPK   |
| GeneCards | Neutrophil extracellular trap formation | SOX2     |
| GeneCards | Neutrophil extracellular trap formation | TRAF3IP2 |
| GeneCards | Neutrophil extracellular trap formation | EGFL7    |
| GeneCards | Neutrophil extracellular trap formation | DVL2     |
| GeneCards | Neutrophil extracellular trap formation | RXRA     |
| GeneCards | Neutrophil extracellular trap formation | CYTH1    |
| GeneCards | Neutrophil extracellular trap formation | MMUT     |
| GeneCards | Neutrophil extracellular trap formation | C12orf60 |
| GeneCards | Neutrophil extracellular trap formation | TLR7     |
| GeneCards | Neutrophil extracellular trap formation | BMP10    |

|           |                                         |          |
|-----------|-----------------------------------------|----------|
| GeneCards | Neutrophil extracellular trap formation | BIRC2    |
| GeneCards | Neutrophil extracellular trap formation | RELB     |
| GeneCards | Neutrophil extracellular trap formation | AXIN1    |
| GeneCards | Neutrophil extracellular trap formation | IL17RC   |
| GeneCards | Neutrophil extracellular trap formation | HRH4     |
| GeneCards | Neutrophil extracellular trap formation | GPC4     |
| GeneCards | Neutrophil extracellular trap formation | PITX3    |
| GeneCards | Neutrophil extracellular trap formation | OXT      |
| GeneCards | Neutrophil extracellular trap formation | PIK3R3   |
| GeneCards | Neutrophil extracellular trap formation | GRM1     |
| GeneCards | Neutrophil extracellular trap formation | ESR2     |
| GeneCards | Neutrophil extracellular trap formation | ATF2     |
| GeneCards | Neutrophil extracellular trap formation | S100A11  |
| GeneCards | Neutrophil extracellular trap formation | GJB2     |
| GeneCards | Neutrophil extracellular trap formation | NOX5     |
| GeneCards | Neutrophil extracellular trap formation | NEDD9    |
| GeneCards | Neutrophil extracellular trap formation | LEMD3    |
| GeneCards | Neutrophil extracellular trap formation | MIR338   |
| GeneCards | Neutrophil extracellular trap formation | FLNA     |
| GeneCards | Neutrophil extracellular trap formation | LGR6     |
| GeneCards | Neutrophil extracellular trap formation | DEFB103B |
| GeneCards | Neutrophil extracellular trap formation | CARD14   |

|           |                                         |          |
|-----------|-----------------------------------------|----------|
| GeneCards | Neutrophil extracellular trap formation | AOC1     |
| GeneCards | Neutrophil extracellular trap formation | PKM      |
| GeneCards | Neutrophil extracellular trap formation | IL12A    |
| GeneCards | Neutrophil extracellular trap formation | SIGLEC14 |
| GeneCards | Neutrophil extracellular trap formation | MBOAT2   |
| GeneCards | Neutrophil extracellular trap formation | LRP6     |
| GeneCards | Neutrophil extracellular trap formation | FASN     |
| GeneCards | Neutrophil extracellular trap formation | EPAS1    |
| GeneCards | Neutrophil extracellular trap formation | MED17    |
| GeneCards | Neutrophil extracellular trap formation | CHD7     |
| GeneCards | Neutrophil extracellular trap formation | TOLLIP   |
| GeneCards | Neutrophil extracellular trap formation | GSK3A    |
| GeneCards | Neutrophil extracellular trap formation | TAB2     |
| GeneCards | Neutrophil extracellular trap formation | COLQ     |
| GeneCards | Neutrophil extracellular trap formation | SIGIRR   |
| GeneCards | Neutrophil extracellular trap formation | SST      |
| GeneCards | Neutrophil extracellular trap formation | SAG      |
| GeneCards | Neutrophil extracellular trap formation | NTRK3    |
| GeneCards | Neutrophil extracellular trap formation | PDE9A    |
| GeneCards | Neutrophil extracellular trap formation | LGALS4   |
| GeneCards | Neutrophil extracellular trap formation | RPS17    |
| GeneCards | Neutrophil extracellular trap formation | ITM2B    |

|           |                                         |           |
|-----------|-----------------------------------------|-----------|
| GeneCards | Neutrophil extracellular trap formation | GNB3      |
| GeneCards | Neutrophil extracellular trap formation | NOTCH2NLA |
| GeneCards | Neutrophil extracellular trap formation | HOXA5     |
| GeneCards | Neutrophil extracellular trap formation | ITPR1     |
| GeneCards | Neutrophil extracellular trap formation | GTF2E2    |
| GeneCards | Neutrophil extracellular trap formation | PROK2     |
| GeneCards | Neutrophil extracellular trap formation | PTGER3    |
| GeneCards | Neutrophil extracellular trap formation | MTRR      |
| GeneCards | Neutrophil extracellular trap formation | GHRL      |
| GeneCards | Neutrophil extracellular trap formation | SFRP2     |
| GeneCards | Neutrophil extracellular trap formation | YWHAB     |
| GeneCards | Neutrophil extracellular trap formation | TFAM      |
| GeneCards | Neutrophil extracellular trap formation | ADM       |
| GeneCards | Neutrophil extracellular trap formation | ADGRG6    |
| GeneCards | Neutrophil extracellular trap formation | PRDX2     |
| GeneCards | Neutrophil extracellular trap formation | HK1       |
| GeneCards | Neutrophil extracellular trap formation | F8        |
| GeneCards | Neutrophil extracellular trap formation | MMRN2     |
| GeneCards | Neutrophil extracellular trap formation | GYPA      |
| GeneCards | Neutrophil extracellular trap formation | APLP2     |
| GeneCards | Neutrophil extracellular trap formation | PTPRF     |
| GeneCards | Neutrophil extracellular trap formation | ARRDC4    |

|           |                                         |          |
|-----------|-----------------------------------------|----------|
| GeneCards | Neutrophil extracellular trap formation | PLSCR1   |
| GeneCards | Neutrophil extracellular trap formation | YY1      |
| GeneCards | Neutrophil extracellular trap formation | PRODH    |
| GeneCards | Neutrophil extracellular trap formation | MPZ      |
| GeneCards | Neutrophil extracellular trap formation | DUOX2    |
| GeneCards | Neutrophil extracellular trap formation | ODC1     |
| GeneCards | Neutrophil extracellular trap formation | MDH1     |
| GeneCards | Neutrophil extracellular trap formation | GFOD2    |
| GeneCards | Neutrophil extracellular trap formation | ATP6V0E2 |
| GeneCards | Neutrophil extracellular trap formation | KCNJ15   |
| GeneCards | Neutrophil extracellular trap formation | NR1H2    |
| GeneCards | Neutrophil extracellular trap formation | SNAI1    |
| GeneCards | Neutrophil extracellular trap formation | SEMA7A   |
| GeneCards | Neutrophil extracellular trap formation | MAPKAPK5 |
| GeneCards | Neutrophil extracellular trap formation | PODXL    |
| GeneCards | Neutrophil extracellular trap formation | EDNRB    |
| GeneCards | Neutrophil extracellular trap formation | GDNF     |
| GeneCards | Neutrophil extracellular trap formation | KLF4     |
| GeneCards | Neutrophil extracellular trap formation | EDN2     |
| GeneCards | Neutrophil extracellular trap formation | SMC3     |
| GeneCards | Neutrophil extracellular trap formation | PSMC4    |
| GeneCards | Neutrophil extracellular trap formation | NDNF     |

|           |                                         |          |
|-----------|-----------------------------------------|----------|
| GeneCards | Neutrophil extracellular trap formation | PIK3R2   |
| GeneCards | Neutrophil extracellular trap formation | PLOD1    |
| GeneCards | Neutrophil extracellular trap formation | HBS1L    |
| GeneCards | Neutrophil extracellular trap formation | BST2     |
| GeneCards | Neutrophil extracellular trap formation | SOAT1    |
| GeneCards | Neutrophil extracellular trap formation | FKBP10   |
| GeneCards | Neutrophil extracellular trap formation | MS4A1    |
| GeneCards | Neutrophil extracellular trap formation | GLDN     |
| GeneCards | Neutrophil extracellular trap formation | OLFML2B  |
| GeneCards | Neutrophil extracellular trap formation | PRKN     |
| GeneCards | Neutrophil extracellular trap formation | BAG5     |
| GeneCards | Neutrophil extracellular trap formation | MLLT10   |
| GeneCards | Neutrophil extracellular trap formation | HMGCR    |
| GeneCards | Neutrophil extracellular trap formation | PROCR    |
| GeneCards | Neutrophil extracellular trap formation | RHO      |
| GeneCards | Neutrophil extracellular trap formation | KLK6     |
| GeneCards | Neutrophil extracellular trap formation | DICER1   |
| GeneCards | Neutrophil extracellular trap formation | EIF4EBP1 |
| GeneCards | Neutrophil extracellular trap formation | HTR2A    |
| GeneCards | Neutrophil extracellular trap formation | TDP2     |
| GeneCards | Neutrophil extracellular trap formation | CA2      |
| GeneCards | Neutrophil extracellular trap formation | TDGF1    |



|           |                                         |        |
|-----------|-----------------------------------------|--------|
| GeneCards | Neutrophil extracellular trap formation | FOXO1  |
| GeneCards | Neutrophil extracellular trap formation | MED21  |
| GeneCards | Neutrophil extracellular trap formation | ABCA3  |
| GeneCards | Neutrophil extracellular trap formation | PEBP1  |
| GeneCards | Neutrophil extracellular trap formation | TEX101 |
| GeneCards | Neutrophil extracellular trap formation | PDIA4  |
| GeneCards | Neutrophil extracellular trap formation | PAPLN  |
| GeneCards | Neutrophil extracellular trap formation | NFATC2 |
| GeneCards | Neutrophil extracellular trap formation | CCL14  |
| GeneCards | Neutrophil extracellular trap formation | LGALS8 |
| GeneCards | Neutrophil extracellular trap formation | MIR22  |
| GeneCards | Neutrophil extracellular trap formation | SMN2   |
| GeneCards | Neutrophil extracellular trap formation | MCU    |
| GeneCards | Neutrophil extracellular trap formation | GABBR2 |
| GeneCards | Neutrophil extracellular trap formation | TRPM7  |
| GeneCards | Neutrophil extracellular trap formation | BMPR2  |
| GeneCards | Neutrophil extracellular trap formation | SOCS2  |
| GeneCards | Neutrophil extracellular trap formation | EGFL6  |
| GeneCards | Neutrophil extracellular trap formation | TAPT1  |
| GeneCards | Neutrophil extracellular trap formation | CTSH   |
| GeneCards | Neutrophil extracellular trap formation | MELTF  |
| GeneCards | Neutrophil extracellular trap formation | ATRX   |

|           |                                         |          |
|-----------|-----------------------------------------|----------|
| GeneCards | Neutrophil extracellular trap formation | FGFBP1   |
| GeneCards | Neutrophil extracellular trap formation | ELAVL1   |
| GeneCards | Neutrophil extracellular trap formation | MED14    |
| GeneCards | Neutrophil extracellular trap formation | SPPL2A   |
| GeneCards | Neutrophil extracellular trap formation | GDF5     |
| GeneCards | Neutrophil extracellular trap formation | SAFB     |
| GeneCards | Neutrophil extracellular trap formation | CSK      |
| GeneCards | Neutrophil extracellular trap formation | BBS10    |
| GeneCards | Neutrophil extracellular trap formation | RTF1     |
| GeneCards | Neutrophil extracellular trap formation | GEMIN4   |
| GeneCards | Neutrophil extracellular trap formation | EZH2     |
| GeneCards | Neutrophil extracellular trap formation | RBM8A    |
| GeneCards | Neutrophil extracellular trap formation | ANKH     |
| GeneCards | Neutrophil extracellular trap formation | CDC37    |
| GeneCards | Neutrophil extracellular trap formation | PVR      |
| GeneCards | Neutrophil extracellular trap formation | RS1      |
| GeneCards | Neutrophil extracellular trap formation | CPEB4    |
| GeneCards | Neutrophil extracellular trap formation | IL26     |
| GeneCards | Neutrophil extracellular trap formation | CD200R1  |
| GeneCards | Neutrophil extracellular trap formation | ACTR2    |
| GeneCards | Neutrophil extracellular trap formation | SLC9A3R1 |
| GeneCards | Neutrophil extracellular trap formation | YWHAH    |

|           |                                         |         |
|-----------|-----------------------------------------|---------|
| GeneCards | Neutrophil extracellular trap formation | GPHN    |
| GeneCards | Neutrophil extracellular trap formation | GCG     |
| GeneCards | Neutrophil extracellular trap formation | KCNH2   |
| GeneCards | Neutrophil extracellular trap formation | GBA     |
| GeneCards | Neutrophil extracellular trap formation | GNRH1   |
| GeneCards | Neutrophil extracellular trap formation | PLA2G2D |
| GeneCards | Neutrophil extracellular trap formation | ELMO1   |
| GeneCards | Neutrophil extracellular trap formation | SLC6A4  |
| GeneCards | Neutrophil extracellular trap formation | HTR1A   |
| GeneCards | Neutrophil extracellular trap formation | SLC7A11 |
| GeneCards | Neutrophil extracellular trap formation | SOST    |
| GeneCards | Neutrophil extracellular trap formation | PDIA3   |
| GeneCards | Neutrophil extracellular trap formation | ATP1A1  |
| GeneCards | Neutrophil extracellular trap formation | PCCA    |
| GeneCards | Neutrophil extracellular trap formation | RPRD2   |
| GeneCards | Neutrophil extracellular trap formation | LRRC17  |
| GeneCards | Neutrophil extracellular trap formation | APAF1   |
| GeneCards | Neutrophil extracellular trap formation | YAP1    |
| GeneCards | Neutrophil extracellular trap formation | PAQR3   |
| GeneCards | Neutrophil extracellular trap formation | TPO     |
| GeneCards | Neutrophil extracellular trap formation | IGFBP7  |
| GeneCards | Neutrophil extracellular trap formation | DNM1L   |

|           |                                         |           |
|-----------|-----------------------------------------|-----------|
| GeneCards | Neutrophil extracellular trap formation | APBB1IP   |
| GeneCards | Neutrophil extracellular trap formation | RAB7A     |
| GeneCards | Neutrophil extracellular trap formation | TAB1      |
| GeneCards | Neutrophil extracellular trap formation | OPRD1     |
| GeneCards | Neutrophil extracellular trap formation | LGMN      |
| GeneCards | Neutrophil extracellular trap formation | SLC17A5   |
| GeneCards | Neutrophil extracellular trap formation | GAB2      |
| GeneCards | Neutrophil extracellular trap formation | GRIA1     |
| GeneCards | Neutrophil extracellular trap formation | S100A1    |
| GeneCards | Neutrophil extracellular trap formation | MPLKIP    |
| GeneCards | Neutrophil extracellular trap formation | PPFIA1    |
| GeneCards | Neutrophil extracellular trap formation | NR1I2     |
| GeneCards | Neutrophil extracellular trap formation | C6orf15   |
| GeneCards | Neutrophil extracellular trap formation | CELSR1    |
| GeneCards | Neutrophil extracellular trap formation | MDM4      |
| GeneCards | Neutrophil extracellular trap formation | TNFRSF10D |
| GeneCards | Neutrophil extracellular trap formation | RING1     |
| GeneCards | Neutrophil extracellular trap formation | DEFA6     |
| GeneCards | Neutrophil extracellular trap formation | GLP1R     |
| GeneCards | Neutrophil extracellular trap formation | MIR93     |
| GeneCards | Neutrophil extracellular trap formation | GRM5      |
| GeneCards | Neutrophil extracellular trap formation | C1S       |

|           |                                         |         |
|-----------|-----------------------------------------|---------|
| GeneCards | Neutrophil extracellular trap formation | GPC3    |
| GeneCards | Neutrophil extracellular trap formation | MALAT1  |
| GeneCards | Neutrophil extracellular trap formation | NBN     |
| GeneCards | Neutrophil extracellular trap formation | MIR27A  |
| GeneCards | Neutrophil extracellular trap formation | CHST11  |
| GeneCards | Neutrophil extracellular trap formation | AKAP13  |
| GeneCards | Neutrophil extracellular trap formation | AOC3    |
| GeneCards | Neutrophil extracellular trap formation | TSKU    |
| GeneCards | Neutrophil extracellular trap formation | EDIL3   |
| GeneCards | Neutrophil extracellular trap formation | SIK2    |
| GeneCards | Neutrophil extracellular trap formation | PANX1   |
| GeneCards | Neutrophil extracellular trap formation | LMNB2   |
| GeneCards | Neutrophil extracellular trap formation | PRDM5   |
| GeneCards | Neutrophil extracellular trap formation | NR1I3   |
| GeneCards | Neutrophil extracellular trap formation | CDK5R1  |
| GeneCards | Neutrophil extracellular trap formation | APLN    |
| GeneCards | Neutrophil extracellular trap formation | SLC43A3 |
| GeneCards | Neutrophil extracellular trap formation | RASA2   |
| GeneCards | Neutrophil extracellular trap formation | SPINT1  |
| GeneCards | Neutrophil extracellular trap formation | SCNN1G  |
| GeneCards | Neutrophil extracellular trap formation | STK11   |
| GeneCards | Neutrophil extracellular trap formation | NAGLU   |

|           |                                         |        |
|-----------|-----------------------------------------|--------|
| GeneCards | Neutrophil extracellular trap formation | WNT2B  |
| GeneCards | Neutrophil extracellular trap formation | FLRT1  |
| GeneCards | Neutrophil extracellular trap formation | ACVR2B |
| GeneCards | Neutrophil extracellular trap formation | SLC2A4 |
| GeneCards | Neutrophil extracellular trap formation | TUFT1  |
| GeneCards | Neutrophil extracellular trap formation | H2BC21 |
| GeneCards | Neutrophil extracellular trap formation | MSMO1  |
| GeneCards | Neutrophil extracellular trap formation | CASP7  |
| GeneCards | Neutrophil extracellular trap formation | IL16   |
| GeneCards | Neutrophil extracellular trap formation | IDH2   |
| GeneCards | Neutrophil extracellular trap formation | TMC6   |
| GeneCards | Neutrophil extracellular trap formation | MLXIPL |
| GeneCards | Neutrophil extracellular trap formation | RECQL4 |
| GeneCards | Neutrophil extracellular trap formation | STT3B  |
| GeneCards | Neutrophil extracellular trap formation | BCHE   |
| GeneCards | Neutrophil extracellular trap formation | TMSB4X |
| GeneCards | Neutrophil extracellular trap formation | NFASC  |
| GeneCards | Neutrophil extracellular trap formation | SFN    |
| GeneCards | Neutrophil extracellular trap formation | NCK1   |
| GeneCards | Neutrophil extracellular trap formation | AGPS   |
| GeneCards | Neutrophil extracellular trap formation | EIF4A3 |
| GeneCards | Neutrophil extracellular trap formation | GPX4   |

|           |                                         |          |
|-----------|-----------------------------------------|----------|
| GeneCards | Neutrophil extracellular trap formation | ENAM     |
| GeneCards | Neutrophil extracellular trap formation | GLS2     |
| GeneCards | Neutrophil extracellular trap formation | GP6      |
| GeneCards | Neutrophil extracellular trap formation | APOD     |
| GeneCards | Neutrophil extracellular trap formation | RPS7     |
| GeneCards | Neutrophil extracellular trap formation | PRKD1    |
| GeneCards | Neutrophil extracellular trap formation | ADPRH    |
| GeneCards | Neutrophil extracellular trap formation | ZMPSTE24 |
| GeneCards | Neutrophil extracellular trap formation | DNAJB12  |
| GeneCards | Neutrophil extracellular trap formation | SOS1     |
| GeneCards | Neutrophil extracellular trap formation | MAP4K4   |
| GeneCards | Neutrophil extracellular trap formation | BLNK     |
| GeneCards | Neutrophil extracellular trap formation | APOH     |
| GeneCards | Neutrophil extracellular trap formation | BDKRB1   |
| GeneCards | Neutrophil extracellular trap formation | TOP1     |
| GeneCards | Neutrophil extracellular trap formation | RXRB     |
| GeneCards | Neutrophil extracellular trap formation | GEMIN7   |
| GeneCards | Neutrophil extracellular trap formation | HSPB2    |
| GeneCards | Neutrophil extracellular trap formation | TBXA2R   |
| GeneCards | Neutrophil extracellular trap formation | ID1      |
| GeneCards | Neutrophil extracellular trap formation | MED15    |
| GeneCards | Neutrophil extracellular trap formation | HMOX2    |

|           |                                         |          |
|-----------|-----------------------------------------|----------|
| GeneCards | Neutrophil extracellular trap formation | CTSV     |
| GeneCards | Neutrophil extracellular trap formation | RAB11A   |
| GeneCards | Neutrophil extracellular trap formation | CILP2    |
| GeneCards | Neutrophil extracellular trap formation | POU5F1   |
| GeneCards | Neutrophil extracellular trap formation | UBE2A    |
| GeneCards | Neutrophil extracellular trap formation | ABCC2    |
| GeneCards | Neutrophil extracellular trap formation | PTPN13   |
| GeneCards | Neutrophil extracellular trap formation | THSD1    |
| GeneCards | Neutrophil extracellular trap formation | SNORC    |
| GeneCards | Neutrophil extracellular trap formation | XBP1     |
| GeneCards | Neutrophil extracellular trap formation | LTK      |
| GeneCards | Neutrophil extracellular trap formation | RAG1     |
| GeneCards | Neutrophil extracellular trap formation | ASL      |
| GeneCards | Neutrophil extracellular trap formation | WNT4     |
| GeneCards | Neutrophil extracellular trap formation | ECRG4    |
| GeneCards | Neutrophil extracellular trap formation | SFXN4    |
| GeneCards | Neutrophil extracellular trap formation | ARC      |
| GeneCards | Neutrophil extracellular trap formation | SHH      |
| GeneCards | Neutrophil extracellular trap formation | ATP5F1B  |
| GeneCards | Neutrophil extracellular trap formation | FKBP14   |
| GeneCards | Neutrophil extracellular trap formation | FUZ      |
| GeneCards | Neutrophil extracellular trap formation | SERPING1 |



|           |                                         |         |
|-----------|-----------------------------------------|---------|
| GeneCards | Neutrophil extracellular trap formation | OXA1L   |
| GeneCards | Neutrophil extracellular trap formation | SLC7A5  |
| GeneCards | Neutrophil extracellular trap formation | PCSK9   |
| GeneCards | Neutrophil extracellular trap formation | TAP1    |
| GeneCards | Neutrophil extracellular trap formation | GEMIN2  |
| GeneCards | Neutrophil extracellular trap formation | JAG1    |
| GeneCards | Neutrophil extracellular trap formation | GNAI3   |
| GeneCards | Neutrophil extracellular trap formation | CLEC5A  |
| GeneCards | Neutrophil extracellular trap formation | MAN1B1  |
| GeneCards | Neutrophil extracellular trap formation | TSPAN32 |
| GeneCards | Neutrophil extracellular trap formation | WNT11   |
| GeneCards | Neutrophil extracellular trap formation | RASA1   |
| GeneCards | Neutrophil extracellular trap formation | RPL35   |
| GeneCards | Neutrophil extracellular trap formation | TMPRSS2 |
| GeneCards | Neutrophil extracellular trap formation | SH3GL1  |
| GeneCards | Neutrophil extracellular trap formation | RNF113A |
| GeneCards | Neutrophil extracellular trap formation | EEF2    |
| GeneCards | Neutrophil extracellular trap formation | CHST12  |
| GeneCards | Neutrophil extracellular trap formation | MED13L  |
| GeneCards | Neutrophil extracellular trap formation | MIR210  |
| GeneCards | Neutrophil extracellular trap formation | HTRA2   |
| GeneCards | Neutrophil extracellular trap formation | PRDX6   |

|           |                                         |           |
|-----------|-----------------------------------------|-----------|
| GeneCards | Neutrophil extracellular trap formation | MLST8     |
| GeneCards | Neutrophil extracellular trap formation | DLL1      |
| GeneCards | Neutrophil extracellular trap formation | PIK3C3    |
| GeneCards | Neutrophil extracellular trap formation | SLC22A5   |
| GeneCards | Neutrophil extracellular trap formation | PGAM1     |
| GeneCards | Neutrophil extracellular trap formation | TNFRSF11A |
| GeneCards | Neutrophil extracellular trap formation | MIR30A    |
| GeneCards | Neutrophil extracellular trap formation | CR2       |
| GeneCards | Neutrophil extracellular trap formation | MVP       |
| GeneCards | Neutrophil extracellular trap formation | BTRC      |
| GeneCards | Neutrophil extracellular trap formation | KCNA2     |
| GeneCards | Neutrophil extracellular trap formation | CLEC4M    |
| GeneCards | Neutrophil extracellular trap formation | IL10RB    |
| GeneCards | Neutrophil extracellular trap formation | EIF2S1    |
| GeneCards | Neutrophil extracellular trap formation | HNRNPM    |
| GeneCards | Neutrophil extracellular trap formation | GATA4     |
| GeneCards | Neutrophil extracellular trap formation | SPRY2     |
| GeneCards | Neutrophil extracellular trap formation | PTPRB     |
| GeneCards | Neutrophil extracellular trap formation | LYZL1     |
| GeneCards | Neutrophil extracellular trap formation | CD99      |
| GeneCards | Neutrophil extracellular trap formation | SH2B3     |
| GeneCards | Neutrophil extracellular trap formation | CPB2      |

|           |                                         |           |
|-----------|-----------------------------------------|-----------|
| GeneCards | Neutrophil extracellular trap formation | IRF1      |
| GeneCards | Neutrophil extracellular trap formation | MIR23A    |
| GeneCards | Neutrophil extracellular trap formation | POLR1C    |
| GeneCards | Neutrophil extracellular trap formation | PCSK6     |
| GeneCards | Neutrophil extracellular trap formation | LINGO1    |
| GeneCards | Neutrophil extracellular trap formation | LHCGR     |
| GeneCards | Neutrophil extracellular trap formation | FZD4      |
| GeneCards | Neutrophil extracellular trap formation | CFB       |
| GeneCards | Neutrophil extracellular trap formation | ITGAE     |
| GeneCards | Neutrophil extracellular trap formation | PON1      |
| GeneCards | Neutrophil extracellular trap formation | UBA52     |
| GeneCards | Neutrophil extracellular trap formation | NPC1      |
| GeneCards | Neutrophil extracellular trap formation | IFITM1    |
| GeneCards | Neutrophil extracellular trap formation | LAP3      |
| GeneCards | Neutrophil extracellular trap formation | DNM3      |
| GeneCards | Neutrophil extracellular trap formation | ENTPD6    |
| GeneCards | Neutrophil extracellular trap formation | S100A6    |
| GeneCards | Neutrophil extracellular trap formation | HNRNPA2B1 |
| GeneCards | Neutrophil extracellular trap formation | BTNL8     |
| GeneCards | Neutrophil extracellular trap formation | PTGR1     |
| GeneCards | Neutrophil extracellular trap formation | PARVA     |
| GeneCards | Neutrophil extracellular trap formation | PLP1      |

|           |                                         |         |
|-----------|-----------------------------------------|---------|
| GeneCards | Neutrophil extracellular trap formation | PROS1   |
| GeneCards | Neutrophil extracellular trap formation | NUP214  |
| GeneCards | Neutrophil extracellular trap formation | PTS     |
| GeneCards | Neutrophil extracellular trap formation | DYSF    |
| GeneCards | Neutrophil extracellular trap formation | DECR1   |
| GeneCards | Neutrophil extracellular trap formation | MPZL3   |
| GeneCards | Neutrophil extracellular trap formation | KRTCAP2 |
| GeneCards | Neutrophil extracellular trap formation | CEMIP2  |
| GeneCards | Neutrophil extracellular trap formation | MAD2L2  |
| GeneCards | Neutrophil extracellular trap formation | CHST14  |
| GeneCards | Neutrophil extracellular trap formation | CLEC2D  |
| GeneCards | Neutrophil extracellular trap formation | LMBRD1  |
| GeneCards | Neutrophil extracellular trap formation | POLH    |
| GeneCards | Neutrophil extracellular trap formation | SLC29A1 |
| GeneCards | Neutrophil extracellular trap formation | PTGDR   |
| GeneCards | Neutrophil extracellular trap formation | MED8    |
| GeneCards | Neutrophil extracellular trap formation | TNFRSF9 |
| GeneCards | Neutrophil extracellular trap formation | MADCAM1 |
| GeneCards | Neutrophil extracellular trap formation | NOTCH4  |
| GeneCards | Neutrophil extracellular trap formation | MITF    |
| GeneCards | Neutrophil extracellular trap formation | VAT1    |
| GeneCards | Neutrophil extracellular trap formation | FUCA2   |

|           |                                         |         |
|-----------|-----------------------------------------|---------|
| GeneCards | Neutrophil extracellular trap formation | CHGA    |
| GeneCards | Neutrophil extracellular trap formation | MYO6    |
| GeneCards | Neutrophil extracellular trap formation | CYRIB   |
| GeneCards | Neutrophil extracellular trap formation | IRS2    |
| GeneCards | Neutrophil extracellular trap formation | TOP2A   |
| GeneCards | Neutrophil extracellular trap formation | SRI     |
| GeneCards | Neutrophil extracellular trap formation | B4GAT1  |
| GeneCards | Neutrophil extracellular trap formation | NCOR2   |
| GeneCards | Neutrophil extracellular trap formation | STX6    |
| GeneCards | Neutrophil extracellular trap formation | ITPR2   |
| GeneCards | Neutrophil extracellular trap formation | LACTB   |
| GeneCards | Neutrophil extracellular trap formation | ATP6V1A |
| GeneCards | Neutrophil extracellular trap formation | MIR122  |
| GeneCards | Neutrophil extracellular trap formation | FBL     |
| GeneCards | Neutrophil extracellular trap formation | MIR28   |
| GeneCards | Neutrophil extracellular trap formation | PPP2CA  |
| GeneCards | Neutrophil extracellular trap formation | GLIPR2  |
| GeneCards | Neutrophil extracellular trap formation | P2RX3   |
| GeneCards | Neutrophil extracellular trap formation | HNF4A   |
| GeneCards | Neutrophil extracellular trap formation | AKAP8L  |
| GeneCards | Neutrophil extracellular trap formation | MYLK2   |
| GeneCards | Neutrophil extracellular trap formation | SPTA1   |

|           |                                         |          |
|-----------|-----------------------------------------|----------|
| GeneCards | Neutrophil extracellular trap formation | PTPN2    |
| GeneCards | Neutrophil extracellular trap formation | ATF6     |
| GeneCards | Neutrophil extracellular trap formation | CYP4F3   |
| GeneCards | Neutrophil extracellular trap formation | ARHGAP26 |
| GeneCards | Neutrophil extracellular trap formation | SLC5A1   |
| GeneCards | Neutrophil extracellular trap formation | GOLM1    |
| GeneCards | Neutrophil extracellular trap formation | DKK1     |
| GeneCards | Neutrophil extracellular trap formation | MED12    |
| GeneCards | Neutrophil extracellular trap formation | GHSR     |
| GeneCards | Neutrophil extracellular trap formation | DNAJC9   |
| GeneCards | Neutrophil extracellular trap formation | RRP1B    |
| GeneCards | Neutrophil extracellular trap formation | TMBIM1   |
| GeneCards | Neutrophil extracellular trap formation | CHRD     |
| GeneCards | Neutrophil extracellular trap formation | H6PD     |
| GeneCards | Neutrophil extracellular trap formation | BCAM     |
| GeneCards | Neutrophil extracellular trap formation | BRD4     |
| GeneCards | Neutrophil extracellular trap formation | PIP5K1B  |
| GeneCards | Neutrophil extracellular trap formation | KCNJ11   |
| GeneCards | Neutrophil extracellular trap formation | IKBKE    |
| GeneCards | Neutrophil extracellular trap formation | PTPRD    |
| GeneCards | Neutrophil extracellular trap formation | DYRK1A   |
| GeneCards | Neutrophil extracellular trap formation | KLK11    |

|           |                                         |        |
|-----------|-----------------------------------------|--------|
| GeneCards | Neutrophil extracellular trap formation | MIR17  |
| GeneCards | Neutrophil extracellular trap formation | VSIR   |
| GeneCards | Neutrophil extracellular trap formation | P4HA2  |
| GeneCards | Neutrophil extracellular trap formation | RAMP1  |
| GeneCards | Neutrophil extracellular trap formation | IFITM3 |
| GeneCards | Neutrophil extracellular trap formation | SMC1A  |
| GeneCards | Neutrophil extracellular trap formation | IL1RAP |
| GeneCards | Neutrophil extracellular trap formation | MFN2   |
| GeneCards | Neutrophil extracellular trap formation | RARB   |
| GeneCards | Neutrophil extracellular trap formation | ANK1   |
| GeneCards | Neutrophil extracellular trap formation | SPTBN1 |
| GeneCards | Neutrophil extracellular trap formation | ASIC3  |
| GeneCards | Neutrophil extracellular trap formation | CDH23  |
| GeneCards | Neutrophil extracellular trap formation | SCT    |
| GeneCards | Neutrophil extracellular trap formation | HAMP   |
| GeneCards | Neutrophil extracellular trap formation | CLNS1A |
| GeneCards | Neutrophil extracellular trap formation | MED26  |
| GeneCards | Neutrophil extracellular trap formation | UBC    |
| GeneCards | Neutrophil extracellular trap formation | TAOK2  |
| GeneCards | Neutrophil extracellular trap formation | CD6    |
| GeneCards | Neutrophil extracellular trap formation | CLTC   |
| GeneCards | Neutrophil extracellular trap formation | LRPAP1 |

|           |                                         |         |
|-----------|-----------------------------------------|---------|
| GeneCards | Neutrophil extracellular trap formation | CCNA2   |
| GeneCards | Neutrophil extracellular trap formation | XK      |
| GeneCards | Neutrophil extracellular trap formation | AZGP1   |
| GeneCards | Neutrophil extracellular trap formation | USP5    |
| GeneCards | Neutrophil extracellular trap formation | SLC5A3  |
| GeneCards | Neutrophil extracellular trap formation | PARK7   |
| GeneCards | Neutrophil extracellular trap formation | MIR127  |
| GeneCards | Neutrophil extracellular trap formation | NCL     |
| GeneCards | Neutrophil extracellular trap formation | OBP2B   |
| GeneCards | Neutrophil extracellular trap formation | VPS33A  |
| GeneCards | Neutrophil extracellular trap formation | MAOA    |
| GeneCards | Neutrophil extracellular trap formation | LAMP3   |
| GeneCards | Neutrophil extracellular trap formation | PTPRE   |
| GeneCards | Neutrophil extracellular trap formation | IL12RB1 |
| GeneCards | Neutrophil extracellular trap formation | STAB2   |
| GeneCards | Neutrophil extracellular trap formation | IFIH1   |
| GeneCards | Neutrophil extracellular trap formation | CLIC1   |
| GeneCards | Neutrophil extracellular trap formation | MCOLN1  |
| GeneCards | Neutrophil extracellular trap formation | MIR150  |
| GeneCards | Neutrophil extracellular trap formation | FAAH    |
| GeneCards | Neutrophil extracellular trap formation | AIRE    |
| GeneCards | Neutrophil extracellular trap formation | PEX1    |



|           |                                         |         |
|-----------|-----------------------------------------|---------|
| GeneCards | Neutrophil extracellular trap formation | EGFL8   |
| GeneCards | Neutrophil extracellular trap formation | PRKAB1  |
| GeneCards | Neutrophil extracellular trap formation | AQP1    |
| GeneCards | Neutrophil extracellular trap formation | TNFSF14 |
| GeneCards | Neutrophil extracellular trap formation | PI16    |
| GeneCards | Neutrophil extracellular trap formation | ITIH5   |
| GeneCards | Neutrophil extracellular trap formation | PTGER1  |
| GeneCards | Neutrophil extracellular trap formation | SLC6A1  |
| GeneCards | Neutrophil extracellular trap formation | SLC6A2  |
| GeneCards | Neutrophil extracellular trap formation | TSPAN8  |
| GeneCards | Neutrophil extracellular trap formation | STAG2   |
| GeneCards | Neutrophil extracellular trap formation | NUDC    |
| GeneCards | Neutrophil extracellular trap formation | GMPPB   |
| GeneCards | Neutrophil extracellular trap formation | CNP     |
| GeneCards | Neutrophil extracellular trap formation | ATP5PO  |
| GeneCards | Neutrophil extracellular trap formation | BRCA2   |
| GeneCards | Neutrophil extracellular trap formation | NUCB1   |
| GeneCards | Neutrophil extracellular trap formation | ITLN1   |
| GeneCards | Neutrophil extracellular trap formation | SUN2    |
| GeneCards | Neutrophil extracellular trap formation | HRH2    |
| GeneCards | Neutrophil extracellular trap formation | CALCR   |
| GeneCards | Neutrophil extracellular trap formation | CYLD    |

|           |                                         |          |
|-----------|-----------------------------------------|----------|
| GeneCards | Neutrophil extracellular trap formation | PTPRH    |
| GeneCards | Neutrophil extracellular trap formation | PGAP3    |
| GeneCards | Neutrophil extracellular trap formation | ARNT     |
| GeneCards | Neutrophil extracellular trap formation | PPP1R12A |
| GeneCards | Neutrophil extracellular trap formation | ATM      |
| GeneCards | Neutrophil extracellular trap formation | KRT8     |
| GeneCards | Neutrophil extracellular trap formation | EMID1    |
| GeneCards | Neutrophil extracellular trap formation | QPCT     |
| GeneCards | Neutrophil extracellular trap formation | MIR30E   |
| GeneCards | Neutrophil extracellular trap formation | KMT2E    |
| GeneCards | Neutrophil extracellular trap formation | CYB5R1   |
| GeneCards | Neutrophil extracellular trap formation | VAMP1    |
| GeneCards | Neutrophil extracellular trap formation | AQP5     |
| GeneCards | Neutrophil extracellular trap formation | CRISPLD2 |
| GeneCards | Neutrophil extracellular trap formation | DYNLL1   |
| GeneCards | Neutrophil extracellular trap formation | PSD      |
| GeneCards | Neutrophil extracellular trap formation | PPIL1    |
| GeneCards | Neutrophil extracellular trap formation | IAPP     |
| GeneCards | Neutrophil extracellular trap formation | RERE     |
| GeneCards | Neutrophil extracellular trap formation | SLC27A2  |
| GeneCards | Neutrophil extracellular trap formation | GARS1    |
| GeneCards | Neutrophil extracellular trap formation | GREM1    |

|           |                                         |          |
|-----------|-----------------------------------------|----------|
| GeneCards | Neutrophil extracellular trap formation | GRM2     |
| GeneCards | Neutrophil extracellular trap formation | STRA6    |
| GeneCards | Neutrophil extracellular trap formation | CDCP1    |
| GeneCards | Neutrophil extracellular trap formation | AKR1A1   |
| GeneCards | Neutrophil extracellular trap formation | MIR574   |
| GeneCards | Neutrophil extracellular trap formation | MPZL1    |
| GeneCards | Neutrophil extracellular trap formation | MAP1LC3A |
| GeneCards | Neutrophil extracellular trap formation | UBAC2    |
| GeneCards | Neutrophil extracellular trap formation | GAD1     |
| GeneCards | Neutrophil extracellular trap formation | THRA     |
| GeneCards | Neutrophil extracellular trap formation | FUCA1    |
| GeneCards | Neutrophil extracellular trap formation | TOMM20   |
| GeneCards | Neutrophil extracellular trap formation | DAPK1    |
| GeneCards | Neutrophil extracellular trap formation | ACVR2A   |
| GeneCards | Neutrophil extracellular trap formation | F7       |
| GeneCards | Neutrophil extracellular trap formation | L1CAM    |
| GeneCards | Neutrophil extracellular trap formation | WNT9B    |
| GeneCards | Neutrophil extracellular trap formation | LSG1     |
| GeneCards | Neutrophil extracellular trap formation | AQP2     |
| GeneCards | Neutrophil extracellular trap formation | NUCB2    |
| GeneCards | Neutrophil extracellular trap formation | EDC3     |
| GeneCards | Neutrophil extracellular trap formation | IGFBP1   |

|           |                                         |           |
|-----------|-----------------------------------------|-----------|
| GeneCards | Neutrophil extracellular trap formation | PTPRM     |
| GeneCards | Neutrophil extracellular trap formation | SELENOK   |
| GeneCards | Neutrophil extracellular trap formation | IRF3      |
| GeneCards | Neutrophil extracellular trap formation | OSCAR     |
| GeneCards | Neutrophil extracellular trap formation | MKI67     |
| GeneCards | Neutrophil extracellular trap formation | RPL3      |
| GeneCards | Neutrophil extracellular trap formation | MARCO     |
| GeneCards | Neutrophil extracellular trap formation | CYP51A1   |
| GeneCards | Neutrophil extracellular trap formation | GATA3     |
| GeneCards | Neutrophil extracellular trap formation | RSPO2     |
| GeneCards | Neutrophil extracellular trap formation | CYP3A4    |
| GeneCards | Neutrophil extracellular trap formation | MAP3K8    |
| GeneCards | Neutrophil extracellular trap formation | IL18BP    |
| GeneCards | Neutrophil extracellular trap formation | WNT7B     |
| GeneCards | Neutrophil extracellular trap formation | AFP       |
| GeneCards | Neutrophil extracellular trap formation | KIDINS220 |
| GeneCards | Neutrophil extracellular trap formation | BAMBI     |
| GeneCards | Neutrophil extracellular trap formation | PPP1CB    |
| GeneCards | Neutrophil extracellular trap formation | ANGPTL6   |
| GeneCards | Neutrophil extracellular trap formation | NPHS1     |
| GeneCards | Neutrophil extracellular trap formation | NUP85     |
| GeneCards | Neutrophil extracellular trap formation | LY6G5B    |

|           |                                         |        |
|-----------|-----------------------------------------|--------|
| GeneCards | Neutrophil extracellular trap formation | CHSY1  |
| GeneCards | Neutrophil extracellular trap formation | H19    |
| GeneCards | Neutrophil extracellular trap formation | DIO3   |
| GeneCards | Neutrophil extracellular trap formation | TALDO1 |
| GeneCards | Neutrophil extracellular trap formation | ATP2A3 |
| GeneCards | Neutrophil extracellular trap formation | AIFM1  |
| GeneCards | Neutrophil extracellular trap formation | RPN2   |
| GeneCards | Neutrophil extracellular trap formation | CNTN2  |
| GeneCards | Neutrophil extracellular trap formation | NOD1   |
| GeneCards | Neutrophil extracellular trap formation | TFB2M  |
| GeneCards | Neutrophil extracellular trap formation | MYOG   |
| GeneCards | Neutrophil extracellular trap formation | MIR15B |
| GeneCards | Neutrophil extracellular trap formation | PRG4   |
| GeneCards | Neutrophil extracellular trap formation | GNG2   |
| GeneCards | Neutrophil extracellular trap formation | RPA1   |
| GeneCards | Neutrophil extracellular trap formation | KRT19  |
| GeneCards | Neutrophil extracellular trap formation | MADD   |
| GeneCards | Neutrophil extracellular trap formation | ROMO1  |
| GeneCards | Neutrophil extracellular trap formation | GDF11  |
| GeneCards | Neutrophil extracellular trap formation | MECP2  |
| GeneCards | Neutrophil extracellular trap formation | IFNA8  |
| GeneCards | Neutrophil extracellular trap formation | CD2    |

|           |                                         |         |
|-----------|-----------------------------------------|---------|
| GeneCards | Neutrophil extracellular trap formation | DHX34   |
| GeneCards | Neutrophil extracellular trap formation | DLK1    |
| GeneCards | Neutrophil extracellular trap formation | MYCN    |
| GeneCards | Neutrophil extracellular trap formation | SH3KBP1 |
| GeneCards | Neutrophil extracellular trap formation | CSE1L   |
| GeneCards | Neutrophil extracellular trap formation | AQP9    |
| GeneCards | Neutrophil extracellular trap formation | CLEC4E  |
| GeneCards | Neutrophil extracellular trap formation | SYP     |
| GeneCards | Neutrophil extracellular trap formation | PPT2    |
| GeneCards | Neutrophil extracellular trap formation | NCOA2   |
| GeneCards | Neutrophil extracellular trap formation | FGF10   |
| GeneCards | Neutrophil extracellular trap formation | EDNRA   |
| GeneCards | Neutrophil extracellular trap formation | FOXF1   |
| GeneCards | Neutrophil extracellular trap formation | LYPD3   |
| GeneCards | Neutrophil extracellular trap formation | CLTRN   |
| GeneCards | Neutrophil extracellular trap formation | DUSP2   |
| GeneCards | Neutrophil extracellular trap formation | SCG5    |
| GeneCards | Neutrophil extracellular trap formation | GP1BB   |
| GeneCards | Neutrophil extracellular trap formation | C1QTNF3 |
| GeneCards | Neutrophil extracellular trap formation | ITFG1   |
| GeneCards | Neutrophil extracellular trap formation | RAD9B   |
| GeneCards | Neutrophil extracellular trap formation | STIM2   |

|           |                                         |          |
|-----------|-----------------------------------------|----------|
| GeneCards | Neutrophil extracellular trap formation | SKIV2L   |
| GeneCards | Neutrophil extracellular trap formation | VIPR1    |
| GeneCards | Neutrophil extracellular trap formation | FLOT2    |
| GeneCards | Neutrophil extracellular trap formation | PNN      |
| GeneCards | Neutrophil extracellular trap formation | PDE5A    |
| GeneCards | Neutrophil extracellular trap formation | HVCN1    |
| GeneCards | Neutrophil extracellular trap formation | RPLP1    |
| GeneCards | Neutrophil extracellular trap formation | TARS2    |
| GeneCards | Neutrophil extracellular trap formation | MAP1LC3B |
| GeneCards | Neutrophil extracellular trap formation | HSP90B1  |
| GeneCards | Neutrophil extracellular trap formation | ABCB6    |
| GeneCards | Neutrophil extracellular trap formation | AHCY     |
| GeneCards | Neutrophil extracellular trap formation | GLA      |
| GeneCards | Neutrophil extracellular trap formation | SERPINA7 |
| GeneCards | Neutrophil extracellular trap formation | TYR      |
| GeneCards | Neutrophil extracellular trap formation | TNFRSF6B |
| GeneCards | Neutrophil extracellular trap formation | IFNAR2   |
| GeneCards | Neutrophil extracellular trap formation | TBP      |
| GeneCards | Neutrophil extracellular trap formation | GAS6     |
| GeneCards | Neutrophil extracellular trap formation | NME2     |
| GeneCards | Neutrophil extracellular trap formation | WWP1     |
| GeneCards | Neutrophil extracellular trap formation | MEF2C    |

|           |                                         |         |
|-----------|-----------------------------------------|---------|
| GeneCards | Neutrophil extracellular trap formation | LTB     |
| GeneCards | Neutrophil extracellular trap formation | EIF4A1  |
| GeneCards | Neutrophil extracellular trap formation | ANKRD27 |
| GeneCards | Neutrophil extracellular trap formation | WIF1    |
| GeneCards | Neutrophil extracellular trap formation | CDK12   |
| GeneCards | Neutrophil extracellular trap formation | DSC3    |
| GeneCards | Neutrophil extracellular trap formation | DDX58   |
| GeneCards | Neutrophil extracellular trap formation | TCOF1   |
| GeneCards | Neutrophil extracellular trap formation | ACTR3   |
| GeneCards | Neutrophil extracellular trap formation | AHR     |
| GeneCards | Neutrophil extracellular trap formation | ZNF318  |
| GeneCards | Neutrophil extracellular trap formation | NME1    |
| GeneCards | Neutrophil extracellular trap formation | IFNL1   |
| GeneCards | Neutrophil extracellular trap formation | DBN1    |
| GeneCards | Neutrophil extracellular trap formation | CYP19A1 |
| GeneCards | Neutrophil extracellular trap formation | TP63    |
| GeneCards | Neutrophil extracellular trap formation | GAB1    |
| GeneCards | Neutrophil extracellular trap formation | ZNF384  |
| GeneCards | Neutrophil extracellular trap formation | VWA7    |
| GeneCards | Neutrophil extracellular trap formation | FKBP5   |
| GeneCards | Neutrophil extracellular trap formation | HDAC1   |
| GeneCards | Neutrophil extracellular trap formation | SFPQ    |



|           |                                         |          |
|-----------|-----------------------------------------|----------|
| GeneCards | Neutrophil extracellular trap formation | NTN4     |
| GeneCards | Neutrophil extracellular trap formation | HIVEP1   |
| GeneCards | Neutrophil extracellular trap formation | HPS6     |
| GeneCards | Neutrophil extracellular trap formation | MAGOH    |
| GeneCards | Neutrophil extracellular trap formation | HDAC6    |
| GeneCards | Neutrophil extracellular trap formation | SLAMF7   |
| GeneCards | Neutrophil extracellular trap formation | EFS      |
| GeneCards | Neutrophil extracellular trap formation | PSMD6    |
| GeneCards | Neutrophil extracellular trap formation | UNC80    |
| GeneCards | Neutrophil extracellular trap formation | IL17B    |
| GeneCards | Neutrophil extracellular trap formation | SRPX     |
| GeneCards | Neutrophil extracellular trap formation | KLF5     |
| GeneCards | Neutrophil extracellular trap formation | SLC12A2  |
| GeneCards | Neutrophil extracellular trap formation | CALB2    |
| GeneCards | Neutrophil extracellular trap formation | MIR221   |
| GeneCards | Neutrophil extracellular trap formation | MGST2    |
| GeneCards | Neutrophil extracellular trap formation | HK3      |
| GeneCards | Neutrophil extracellular trap formation | KSR1     |
| GeneCards | Neutrophil extracellular trap formation | FLT4     |
| GeneCards | Neutrophil extracellular trap formation | MIRLET7G |
| GeneCards | Neutrophil extracellular trap formation | GEMIN6   |
| GeneCards | Neutrophil extracellular trap formation | RABGAP1L |

|           |                                         |          |
|-----------|-----------------------------------------|----------|
| GeneCards | Neutrophil extracellular trap formation | GDF2     |
| GeneCards | Neutrophil extracellular trap formation | IRF4     |
| GeneCards | Neutrophil extracellular trap formation | PRKCG    |
| GeneCards | Neutrophil extracellular trap formation | HGS      |
| GeneCards | Neutrophil extracellular trap formation | MX1      |
| GeneCards | Neutrophil extracellular trap formation | P4HA1    |
| GeneCards | Neutrophil extracellular trap formation | METTL3   |
| GeneCards | Neutrophil extracellular trap formation | SLAMF6   |
| GeneCards | Neutrophil extracellular trap formation | FZD6     |
| GeneCards | Neutrophil extracellular trap formation | IDO1     |
| GeneCards | Neutrophil extracellular trap formation | CIAPIN1  |
| GeneCards | Neutrophil extracellular trap formation | FLNB     |
| GeneCards | Neutrophil extracellular trap formation | NR0B2    |
| GeneCards | Neutrophil extracellular trap formation | LRG1     |
| GeneCards | Neutrophil extracellular trap formation | CIB1     |
| GeneCards | Neutrophil extracellular trap formation | CNPY4    |
| GeneCards | Neutrophil extracellular trap formation | WASL     |
| GeneCards | Neutrophil extracellular trap formation | NPTN     |
| GeneCards | Neutrophil extracellular trap formation | CREB5    |
| GeneCards | Neutrophil extracellular trap formation | FBLIM1   |
| GeneCards | Neutrophil extracellular trap formation | ERVFRD-1 |
| GeneCards | Neutrophil extracellular trap formation | APH1A    |

|           |                                         |          |
|-----------|-----------------------------------------|----------|
| GeneCards | Neutrophil extracellular trap formation | MIR181A1 |
| GeneCards | Neutrophil extracellular trap formation | CYP2D6   |
| GeneCards | Neutrophil extracellular trap formation | ISYNA1   |
| GeneCards | Neutrophil extracellular trap formation | MAP2     |
| GeneCards | Neutrophil extracellular trap formation | SPAG1    |
| GeneCards | Neutrophil extracellular trap formation | PGR      |
| GeneCards | Neutrophil extracellular trap formation | RASSF1   |
| GeneCards | Neutrophil extracellular trap formation | ALKAL2   |
| GeneCards | Neutrophil extracellular trap formation | CYTH2    |
| GeneCards | Neutrophil extracellular trap formation | KPNB1    |
| GeneCards | Neutrophil extracellular trap formation | SERPINA5 |
| GeneCards | Neutrophil extracellular trap formation | LRRN1    |
| GeneCards | Neutrophil extracellular trap formation | SV2A     |
| GeneCards | Neutrophil extracellular trap formation | APPL1    |
| GeneCards | Neutrophil extracellular trap formation | PROZ     |
| GeneCards | Neutrophil extracellular trap formation | CUL1     |
| GeneCards | Neutrophil extracellular trap formation | KEAP1    |
| GeneCards | Neutrophil extracellular trap formation | ATF3     |
| GeneCards | Neutrophil extracellular trap formation | FNDC4    |
| GeneCards | Neutrophil extracellular trap formation | ZNF77    |
| GeneCards | Neutrophil extracellular trap formation | ZFP36L1  |
| GeneCards | Neutrophil extracellular trap formation | SERPINI1 |

|           |                                         |          |
|-----------|-----------------------------------------|----------|
| GeneCards | Neutrophil extracellular trap formation | SMTN     |
| GeneCards | Neutrophil extracellular trap formation | MSTN     |
| GeneCards | Neutrophil extracellular trap formation | PTPMT1   |
| GeneCards | Neutrophil extracellular trap formation | MRPS21   |
| GeneCards | Neutrophil extracellular trap formation | CHGB     |
| GeneCards | Neutrophil extracellular trap formation | NOX4     |
| GeneCards | Neutrophil extracellular trap formation | SDHB     |
| GeneCards | Neutrophil extracellular trap formation | AGO2     |
| GeneCards | Neutrophil extracellular trap formation | C1QTNF5  |
| GeneCards | Neutrophil extracellular trap formation | ATP2B1   |
| GeneCards | Neutrophil extracellular trap formation | CCKAR    |
| GeneCards | Neutrophil extracellular trap formation | RPS16    |
| GeneCards | Neutrophil extracellular trap formation | C15orf39 |
| GeneCards | Neutrophil extracellular trap formation | CS       |
| GeneCards | Neutrophil extracellular trap formation | SND1     |
| GeneCards | Neutrophil extracellular trap formation | DCD      |
| GeneCards | Neutrophil extracellular trap formation | UNC5B    |
| GeneCards | Neutrophil extracellular trap formation | NCOA3    |
| GeneCards | Neutrophil extracellular trap formation | DUOX1    |
| GeneCards | Neutrophil extracellular trap formation | TPMT     |
| GeneCards | Neutrophil extracellular trap formation | DIABLO   |
| GeneCards | Neutrophil extracellular trap formation | SEMA3C   |

|           |                                         |         |
|-----------|-----------------------------------------|---------|
| GeneCards | Neutrophil extracellular trap formation | ABCC4   |
| GeneCards | Neutrophil extracellular trap formation | EEA1    |
| GeneCards | Neutrophil extracellular trap formation | HMG2    |
| GeneCards | Neutrophil extracellular trap formation | NTSR1   |
| GeneCards | Neutrophil extracellular trap formation | HSD11B1 |
| GeneCards | Neutrophil extracellular trap formation | SCTR    |
| GeneCards | Neutrophil extracellular trap formation | SLC1A5  |
| GeneCards | Neutrophil extracellular trap formation | PTPRT   |
| GeneCards | Neutrophil extracellular trap formation | ABCC6   |
| GeneCards | Neutrophil extracellular trap formation | CBLIF   |
| GeneCards | Neutrophil extracellular trap formation | LPIN1   |
| GeneCards | Neutrophil extracellular trap formation | BIN1    |
| GeneCards | Neutrophil extracellular trap formation | PIIP5K2 |
| GeneCards | Neutrophil extracellular trap formation | SEMA3A  |
| GeneCards | Neutrophil extracellular trap formation | MTHFD1  |
| GeneCards | Neutrophil extracellular trap formation | CHRDL2  |
| GeneCards | Neutrophil extracellular trap formation | CD5     |
| GeneCards | Neutrophil extracellular trap formation | EPHB4   |
| GeneCards | Neutrophil extracellular trap formation | UBIAD1  |
| GeneCards | Neutrophil extracellular trap formation | S1PR5   |
| GeneCards | Neutrophil extracellular trap formation | RPS18   |
| GeneCards | Neutrophil extracellular trap formation | SLC22A4 |

|           |                                         |          |
|-----------|-----------------------------------------|----------|
| GeneCards | Neutrophil extracellular trap formation | ORMDL3   |
| GeneCards | Neutrophil extracellular trap formation | CDH4     |
| GeneCards | Neutrophil extracellular trap formation | HEXA     |
| GeneCards | Neutrophil extracellular trap formation | ALKAL1   |
| GeneCards | Neutrophil extracellular trap formation | ADGRF5   |
| GeneCards | Neutrophil extracellular trap formation | SLC5A6   |
| GeneCards | Neutrophil extracellular trap formation | CD3D     |
| GeneCards | Neutrophil extracellular trap formation | CCT3     |
| GeneCards | Neutrophil extracellular trap formation | EEF1A1   |
| GeneCards | Neutrophil extracellular trap formation | CITED2   |
| GeneCards | Neutrophil extracellular trap formation | GPX1     |
| GeneCards | Neutrophil extracellular trap formation | UGDH     |
| GeneCards | Neutrophil extracellular trap formation | RAB11B   |
| GeneCards | Neutrophil extracellular trap formation | TSPAN14  |
| GeneCards | Neutrophil extracellular trap formation | GCLM     |
| GeneCards | Neutrophil extracellular trap formation | STAG1    |
| GeneCards | Neutrophil extracellular trap formation | DBNL     |
| GeneCards | Neutrophil extracellular trap formation | ATP6V0D2 |
| GeneCards | Neutrophil extracellular trap formation | SUN1     |
| GeneCards | Neutrophil extracellular trap formation | DAXX     |
| GeneCards | Neutrophil extracellular trap formation | TH       |
| GeneCards | Neutrophil extracellular trap formation | KLK4     |

|           |                                         |         |
|-----------|-----------------------------------------|---------|
| GeneCards | Neutrophil extracellular trap formation | PHB1    |
| GeneCards | Neutrophil extracellular trap formation | CDC25A  |
| GeneCards | Neutrophil extracellular trap formation | NRDC    |
| GeneCards | Neutrophil extracellular trap formation | DRAXIN  |
| GeneCards | Neutrophil extracellular trap formation | HDC     |
| GeneCards | Neutrophil extracellular trap formation | VAPA    |
| GeneCards | Neutrophil extracellular trap formation | CCT4    |
| GeneCards | Neutrophil extracellular trap formation | PRDX4   |
| GeneCards | Neutrophil extracellular trap formation | CACNA1C |
| GeneCards | Neutrophil extracellular trap formation | ISM2    |
| GeneCards | Neutrophil extracellular trap formation | RBX1    |
| GeneCards | Neutrophil extracellular trap formation | LEFTY2  |
| GeneCards | Neutrophil extracellular trap formation | CLINT1  |
| GeneCards | Neutrophil extracellular trap formation | RPS25   |
| GeneCards | Neutrophil extracellular trap formation | SLC7A7  |
| GeneCards | Neutrophil extracellular trap formation | IGHG1   |
| GeneCards | Neutrophil extracellular trap formation | SLIT3   |
| GeneCards | Neutrophil extracellular trap formation | MPP2    |
| GeneCards | Neutrophil extracellular trap formation | TBC1D1  |
| GeneCards | Neutrophil extracellular trap formation | MEGF6   |
| GeneCards | Neutrophil extracellular trap formation | HTR4    |
| GeneCards | Neutrophil extracellular trap formation | TSPAN3  |

|           |                                         |         |
|-----------|-----------------------------------------|---------|
| GeneCards | Neutrophil extracellular trap formation | AHNAK   |
| GeneCards | Neutrophil extracellular trap formation | PCMT1   |
| GeneCards | Neutrophil extracellular trap formation | B3GALT4 |
| GeneCards | Neutrophil extracellular trap formation | ERFE    |
| GeneCards | Neutrophil extracellular trap formation | SREBF1  |
| GeneCards | Neutrophil extracellular trap formation | SPOCK3  |
| GeneCards | Neutrophil extracellular trap formation | MAG     |
| GeneCards | Neutrophil extracellular trap formation | DDOST   |
| GeneCards | Neutrophil extracellular trap formation | SEMA6C  |
| GeneCards | Neutrophil extracellular trap formation | DBT     |
| GeneCards | Neutrophil extracellular trap formation | PTPRK   |
| GeneCards | Neutrophil extracellular trap formation | TRIP11  |
| GeneCards | Neutrophil extracellular trap formation | CARD16  |
| GeneCards | Neutrophil extracellular trap formation | ATP2A2  |
| GeneCards | Neutrophil extracellular trap formation | MCM6    |
| GeneCards | Neutrophil extracellular trap formation | MT3     |
| GeneCards | Neutrophil extracellular trap formation | CPVL    |
| GeneCards | Neutrophil extracellular trap formation | RAPGEF1 |
| GeneCards | Neutrophil extracellular trap formation | CA9     |
| GeneCards | Neutrophil extracellular trap formation | ITGA10  |
| GeneCards | Neutrophil extracellular trap formation | XYLT2   |
| GeneCards | Neutrophil extracellular trap formation | ACO1    |



|           |                                         |         |
|-----------|-----------------------------------------|---------|
| GeneCards | Neutrophil extracellular trap formation | RAMP2   |
| GeneCards | Neutrophil extracellular trap formation | SLC30A7 |
| GeneCards | Neutrophil extracellular trap formation | FAM111A |
| GeneCards | Neutrophil extracellular trap formation | RPS15   |
| GeneCards | Neutrophil extracellular trap formation | CDKAL1  |
| GeneCards | Neutrophil extracellular trap formation | C4B     |
| GeneCards | Neutrophil extracellular trap formation | HMGA2   |
| GeneCards | Neutrophil extracellular trap formation | TMEM131 |
| GeneCards | Neutrophil extracellular trap formation | EDEM3   |
| GeneCards | Neutrophil extracellular trap formation | PI4KB   |
| GeneCards | Neutrophil extracellular trap formation | RAB4A   |
| GeneCards | Neutrophil extracellular trap formation | TRPC3   |
| GeneCards | Neutrophil extracellular trap formation | STMN1   |
| GeneCards | Neutrophil extracellular trap formation | NPPC    |
| GeneCards | Neutrophil extracellular trap formation | C1orf56 |
| GeneCards | Neutrophil extracellular trap formation | ILF2    |
| GeneCards | Neutrophil extracellular trap formation | SGPL1   |
| GeneCards | Neutrophil extracellular trap formation | TXNDC5  |
| GeneCards | Neutrophil extracellular trap formation | BHLHE40 |
| GeneCards | Neutrophil extracellular trap formation | CALCRL  |
| GeneCards | Neutrophil extracellular trap formation | SRPX2   |
| GeneCards | Neutrophil extracellular trap formation | SRSF1   |

|           |                                         |         |
|-----------|-----------------------------------------|---------|
| GeneCards | Neutrophil extracellular trap formation | CUL7    |
| GeneCards | Neutrophil extracellular trap formation | CYP1A1  |
| GeneCards | Neutrophil extracellular trap formation | TANK    |
| GeneCards | Neutrophil extracellular trap formation | MIR144  |
| GeneCards | Neutrophil extracellular trap formation | SLC35B2 |
| GeneCards | Neutrophil extracellular trap formation | POLRMT  |
| GeneCards | Neutrophil extracellular trap formation | NTN3    |
| GeneCards | Neutrophil extracellular trap formation | STX7    |
| GeneCards | Neutrophil extracellular trap formation | NCOR1   |
| GeneCards | Neutrophil extracellular trap formation | RPL38   |
| GeneCards | Neutrophil extracellular trap formation | MED6    |
| GeneCards | Neutrophil extracellular trap formation | ATP6AP1 |
| GeneCards | Neutrophil extracellular trap formation | GNAS    |
| GeneCards | Neutrophil extracellular trap formation | KCNN3   |
| GeneCards | Neutrophil extracellular trap formation | PRPF8   |
| GeneCards | Neutrophil extracellular trap formation | RAB14   |
| GeneCards | Neutrophil extracellular trap formation | MED10   |
| GeneCards | Neutrophil extracellular trap formation | ERAP2   |
| GeneCards | Neutrophil extracellular trap formation | CACNA1E |
| GeneCards | Neutrophil extracellular trap formation | ZFP36   |
| GeneCards | Neutrophil extracellular trap formation | TNPO1   |
| GeneCards | Neutrophil extracellular trap formation | AQP3    |

|           |                                         |          |
|-----------|-----------------------------------------|----------|
| GeneCards | Neutrophil extracellular trap formation | GTF2I    |
| GeneCards | Neutrophil extracellular trap formation | PHEX     |
| GeneCards | Neutrophil extracellular trap formation | MAN2B2   |
| GeneCards | Neutrophil extracellular trap formation | UPF1     |
| GeneCards | Neutrophil extracellular trap formation | FNDC3B   |
| GeneCards | Neutrophil extracellular trap formation | DGKQ     |
| GeneCards | Neutrophil extracellular trap formation | DOT1L    |
| GeneCards | Neutrophil extracellular trap formation | WNT2     |
| GeneCards | Neutrophil extracellular trap formation | PDE3B    |
| GeneCards | Neutrophil extracellular trap formation | ZBTB10   |
| GeneCards | Neutrophil extracellular trap formation | MIRLET7D |
| GeneCards | Neutrophil extracellular trap formation | C4BPB    |
| GeneCards | Neutrophil extracellular trap formation | NUP160   |
| GeneCards | Neutrophil extracellular trap formation | TAT      |
| GeneCards | Neutrophil extracellular trap formation | ERVW-1   |
| GeneCards | Neutrophil extracellular trap formation | MGAT1    |
| GeneCards | Neutrophil extracellular trap formation | MTMR3    |
| GeneCards | Neutrophil extracellular trap formation | OTUD7B   |
| GeneCards | Neutrophil extracellular trap formation | HS6ST2   |
| GeneCards | Neutrophil extracellular trap formation | CEP89    |
| GeneCards | Neutrophil extracellular trap formation | XRCC1    |
| GeneCards | Neutrophil extracellular trap formation | ZFP36L2  |

|           |                                         |         |
|-----------|-----------------------------------------|---------|
| GeneCards | Neutrophil extracellular trap formation | NTNG1   |
| GeneCards | Neutrophil extracellular trap formation | H2BC12L |
| GeneCards | Neutrophil extracellular trap formation | EHD4    |
| GeneCards | Neutrophil extracellular trap formation | GP5     |
| GeneCards | Neutrophil extracellular trap formation | RANBP2  |
| GeneCards | Neutrophil extracellular trap formation | AIFM2   |
| GeneCards | Neutrophil extracellular trap formation | LIPC    |
| GeneCards | Neutrophil extracellular trap formation | TRADD   |
| GeneCards | Neutrophil extracellular trap formation | MAPRE1  |
| GeneCards | Neutrophil extracellular trap formation | ERP44   |
| GeneCards | Neutrophil extracellular trap formation | KCNJ6   |
| GeneCards | Neutrophil extracellular trap formation | CD22    |
| GeneCards | Neutrophil extracellular trap formation | METAP2  |
| GeneCards | Neutrophil extracellular trap formation | TARDBP  |
| GeneCards | Neutrophil extracellular trap formation | ZFPL1   |
| GeneCards | Neutrophil extracellular trap formation | SLC16A1 |
| GeneCards | Neutrophil extracellular trap formation | PPCDC   |
| GeneCards | Neutrophil extracellular trap formation | S100A10 |
| GeneCards | Neutrophil extracellular trap formation | ACVR1B  |
| GeneCards | Neutrophil extracellular trap formation | VPS28   |
| GeneCards | Neutrophil extracellular trap formation | ACP3    |
| GeneCards | Neutrophil extracellular trap formation | ADGRL3  |

|           |                                         |        |
|-----------|-----------------------------------------|--------|
| GeneCards | Neutrophil extracellular trap formation | CHEK1  |
| GeneCards | Neutrophil extracellular trap formation | CDIPT  |
| GeneCards | Neutrophil extracellular trap formation | EIF3I  |
| GeneCards | Neutrophil extracellular trap formation | ZNRD2  |
| GeneCards | Neutrophil extracellular trap formation | INHBE  |
| GeneCards | Neutrophil extracellular trap formation | TJP2   |
| GeneCards | Neutrophil extracellular trap formation | FLNC   |
| GeneCards | Neutrophil extracellular trap formation | TRPV2  |
| GeneCards | Neutrophil extracellular trap formation | S100P  |
| GeneCards | Neutrophil extracellular trap formation | ZACN   |
| GeneCards | Neutrophil extracellular trap formation | PTGDS  |
| GeneCards | Neutrophil extracellular trap formation | SART1  |
| GeneCards | Neutrophil extracellular trap formation | IBTK   |
| GeneCards | Neutrophil extracellular trap formation | DHX9   |
| GeneCards | Neutrophil extracellular trap formation | DEF6   |
| GeneCards | Neutrophil extracellular trap formation | MCAM   |
| GeneCards | Neutrophil extracellular trap formation | VAMP3  |
| GeneCards | Neutrophil extracellular trap formation | SARAF  |
| GeneCards | Neutrophil extracellular trap formation | TFF1   |
| GeneCards | Neutrophil extracellular trap formation | FBXL12 |
| GeneCards | Neutrophil extracellular trap formation | IQSEC1 |
| GeneCards | Neutrophil extracellular trap formation | JMJD1C |

|           |                                         |         |
|-----------|-----------------------------------------|---------|
| GeneCards | Neutrophil extracellular trap formation | PTGIR   |
| GeneCards | Neutrophil extracellular trap formation | CRELD1  |
| GeneCards | Neutrophil extracellular trap formation | UBE2I   |
| GeneCards | Neutrophil extracellular trap formation | ARHGAP1 |
| GeneCards | Neutrophil extracellular trap formation | FLI1    |
| GeneCards | Neutrophil extracellular trap formation | LRP5    |
| GeneCards | Neutrophil extracellular trap formation | FLT3LG  |
| GeneCards | Neutrophil extracellular trap formation | MMAB    |
| GeneCards | Neutrophil extracellular trap formation | CHERP   |
| GeneCards | Neutrophil extracellular trap formation | MKNK1   |
| GeneCards | Neutrophil extracellular trap formation | MUS81   |
| GeneCards | Neutrophil extracellular trap formation | RXFP1   |
| GeneCards | Neutrophil extracellular trap formation | HNRNPL  |
| GeneCards | Neutrophil extracellular trap formation | MIR140  |
| GeneCards | Neutrophil extracellular trap formation | ACTG2   |
| GeneCards | Neutrophil extracellular trap formation | LRRC8E  |
| GeneCards | Neutrophil extracellular trap formation | LCLAT1  |
| GeneCards | Neutrophil extracellular trap formation | MED23   |
| GeneCards | Neutrophil extracellular trap formation | PTK7    |
| GeneCards | Neutrophil extracellular trap formation | FAM136A |
| GeneCards | Neutrophil extracellular trap formation | TCP1    |
| GeneCards | Neutrophil extracellular trap formation | TUBB3   |

|           |                                         |         |
|-----------|-----------------------------------------|---------|
| GeneCards | Neutrophil extracellular trap formation | APBB1   |
| GeneCards | Neutrophil extracellular trap formation | STK3    |
| GeneCards | Neutrophil extracellular trap formation | CLEC14A |
| GeneCards | Neutrophil extracellular trap formation | SMARCC2 |
| GeneCards | Neutrophil extracellular trap formation | SEPTIN7 |
| GeneCards | Neutrophil extracellular trap formation | TAC3    |
| GeneCards | Neutrophil extracellular trap formation | PI4KA   |
| GeneCards | Neutrophil extracellular trap formation | FBXW7   |
| GeneCards | Neutrophil extracellular trap formation | FAM3D   |
| GeneCards | Neutrophil extracellular trap formation | STT3A   |
| GeneCards | Neutrophil extracellular trap formation | SLC20A1 |
| GeneCards | Neutrophil extracellular trap formation | MIR29C  |
| GeneCards | Neutrophil extracellular trap formation | MIR342  |
| GeneCards | Neutrophil extracellular trap formation | RPL32   |
| GeneCards | Neutrophil extracellular trap formation | CD82    |
| GeneCards | Neutrophil extracellular trap formation | VSIG4   |
| GeneCards | Neutrophil extracellular trap formation | SUFU    |
| GeneCards | Neutrophil extracellular trap formation | HUWE1   |
| GeneCards | Neutrophil extracellular trap formation | SERBP1  |
| GeneCards | Neutrophil extracellular trap formation | IL17C   |
| GeneCards | Neutrophil extracellular trap formation | MBTPS1  |
| GeneCards | Neutrophil extracellular trap formation | TIAM1   |

|           |                                         |          |
|-----------|-----------------------------------------|----------|
| GeneCards | Neutrophil extracellular trap formation | NBL1     |
| GeneCards | Neutrophil extracellular trap formation | UCN      |
| GeneCards | Neutrophil extracellular trap formation | SMAD1    |
| GeneCards | Neutrophil extracellular trap formation | ACSF3    |
| GeneCards | Neutrophil extracellular trap formation | ABCC8    |
| GeneCards | Neutrophil extracellular trap formation | CLEC1A   |
| GeneCards | Neutrophil extracellular trap formation | ANGPTL2  |
| GeneCards | Neutrophil extracellular trap formation | PTPRZ1   |
| GeneCards | Neutrophil extracellular trap formation | GABRG2   |
| GeneCards | Neutrophil extracellular trap formation | OGT      |
| GeneCards | Neutrophil extracellular trap formation | FGF8     |
| GeneCards | Neutrophil extracellular trap formation | HSD17B12 |
| GeneCards | Neutrophil extracellular trap formation | DUSP3    |
| GeneCards | Neutrophil extracellular trap formation | DBH      |
| GeneCards | Neutrophil extracellular trap formation | SYT1     |
| GeneCards | Neutrophil extracellular trap formation | POLD1    |
| GeneCards | Neutrophil extracellular trap formation | JARID2   |
| GeneCards | Neutrophil extracellular trap formation | APBA1    |
| GeneCards | Neutrophil extracellular trap formation | C1orf35  |
| GeneCards | Neutrophil extracellular trap formation | IGKC     |
| GeneCards | Neutrophil extracellular trap formation | PCBP1    |
| GeneCards | Neutrophil extracellular trap formation | RPE65    |



|           |                                         |          |
|-----------|-----------------------------------------|----------|
| GeneCards | Neutrophil extracellular trap formation | SLC26A5  |
| GeneCards | Neutrophil extracellular trap formation | ATP6V1H  |
| GeneCards | Neutrophil extracellular trap formation | RCOR1    |
| GeneCards | Neutrophil extracellular trap formation | BOD1     |
| GeneCards | Neutrophil extracellular trap formation | MIDN     |
| GeneCards | Neutrophil extracellular trap formation | ALDH18A1 |
| GeneCards | Neutrophil extracellular trap formation | MIR10A   |
| GeneCards | Neutrophil extracellular trap formation | AP4M1    |
| GeneCards | Neutrophil extracellular trap formation | CALU     |
| GeneCards | Neutrophil extracellular trap formation | TYMP     |
| GeneCards | Neutrophil extracellular trap formation | EVI5     |
| GeneCards | Neutrophil extracellular trap formation | PDE7A    |
| GeneCards | Neutrophil extracellular trap formation | SIGLEC12 |
| GeneCards | Neutrophil extracellular trap formation | MT-CO1   |
| GeneCards | Neutrophil extracellular trap formation | GFM1     |
| GeneCards | Neutrophil extracellular trap formation | CPSF6    |
| GeneCards | Neutrophil extracellular trap formation | MTHFD1L  |
| GeneCards | Neutrophil extracellular trap formation | SNX17    |
| GeneCards | Neutrophil extracellular trap formation | FMO3     |
| GeneCards | Neutrophil extracellular trap formation | DPYSL2   |
| GeneCards | Neutrophil extracellular trap formation | TNRC6B   |
| GeneCards | Neutrophil extracellular trap formation | PDXK     |

|           |                                         |         |
|-----------|-----------------------------------------|---------|
| GeneCards | Neutrophil extracellular trap formation | CDK8    |
| GeneCards | Neutrophil extracellular trap formation | CKAP4   |
| GeneCards | Neutrophil extracellular trap formation | SCAMP2  |
| GeneCards | Neutrophil extracellular trap formation | TRIM4   |
| GeneCards | Neutrophil extracellular trap formation | ALDH8A1 |
| GeneCards | Neutrophil extracellular trap formation | MOCS3   |
| GeneCards | Neutrophil extracellular trap formation | NAPA    |
| GeneCards | Neutrophil extracellular trap formation | CYP17A1 |
| GeneCards | Neutrophil extracellular trap formation | HAGH    |
| GeneCards | Neutrophil extracellular trap formation | OPA1    |
| GeneCards | Neutrophil extracellular trap formation | EAPP    |
| GeneCards | Neutrophil extracellular trap formation | SPRY1   |
| GeneCards | Neutrophil extracellular trap formation | AMD1    |
| GeneCards | Neutrophil extracellular trap formation | DAP3    |
| GeneCards | Neutrophil extracellular trap formation | RMDN3   |
| GeneCards | Neutrophil extracellular trap formation | MPZL2   |
| GeneCards | Neutrophil extracellular trap formation | SIN3A   |
| GeneCards | Neutrophil extracellular trap formation | GHDC    |
| GeneCards | Neutrophil extracellular trap formation | NONO    |
| GeneCards | Neutrophil extracellular trap formation | DNAJB6  |
| GeneCards | Neutrophil extracellular trap formation | AMBRA1  |
| GeneCards | Neutrophil extracellular trap formation | APBA3   |

|           |                                         |          |
|-----------|-----------------------------------------|----------|
| GeneCards | Neutrophil extracellular trap formation | ARHGAP32 |
| GeneCards | Neutrophil extracellular trap formation | SCAP     |
| GeneCards | Neutrophil extracellular trap formation | GLRB     |
| GeneCards | Neutrophil extracellular trap formation | MKS1     |
| GeneCards | Neutrophil extracellular trap formation | CSNK1D   |
| GeneCards | Neutrophil extracellular trap formation | PAK4     |
| GeneCards | Neutrophil extracellular trap formation | FOLR2    |
| GeneCards | Neutrophil extracellular trap formation | LPCAT1   |
| GeneCards | Neutrophil extracellular trap formation | XPC      |
| GeneCards | Neutrophil extracellular trap formation | RICTOR   |
| GeneCards | Neutrophil extracellular trap formation | NCS1     |
| GeneCards | Neutrophil extracellular trap formation | CNGA3    |
| GeneCards | Neutrophil extracellular trap formation | DSC1     |
| GeneCards | Neutrophil extracellular trap formation | PDCD4    |
| GeneCards | Neutrophil extracellular trap formation | MRC1     |
| GeneCards | Neutrophil extracellular trap formation | MRI1     |
| GeneCards | Neutrophil extracellular trap formation | PLCB3    |
| GeneCards | Neutrophil extracellular trap formation | TMEM123  |
| GeneCards | Neutrophil extracellular trap formation | CCKBR    |
| GeneCards | Neutrophil extracellular trap formation | PRKCH    |
| GeneCards | Neutrophil extracellular trap formation | SCARB2   |
| GeneCards | Neutrophil extracellular trap formation | CA14     |

|           |                                         |         |
|-----------|-----------------------------------------|---------|
| GeneCards | Neutrophil extracellular trap formation | SLC35D1 |
| GeneCards | Neutrophil extracellular trap formation | CRTC3   |
| GeneCards | Neutrophil extracellular trap formation | SORD    |
| GeneCards | Neutrophil extracellular trap formation | HDAC3   |
| GeneCards | Neutrophil extracellular trap formation | ABCB7   |
| GeneCards | Neutrophil extracellular trap formation | LNPEP   |
| GeneCards | Neutrophil extracellular trap formation | WNT6    |
| GeneCards | Neutrophil extracellular trap formation | IFITM2  |
| GeneCards | Neutrophil extracellular trap formation | DLC1    |
| GeneCards | Neutrophil extracellular trap formation | FAT2    |
| GeneCards | Neutrophil extracellular trap formation | MAX     |
| GeneCards | Neutrophil extracellular trap formation | CDK13   |
| GeneCards | Neutrophil extracellular trap formation | PAF1    |
| GeneCards | Neutrophil extracellular trap formation | LCN1    |
| GeneCards | Neutrophil extracellular trap formation | MXI1    |
| GeneCards | Neutrophil extracellular trap formation | PLAC1   |
| GeneCards | Neutrophil extracellular trap formation | RNASE1  |
| GeneCards | Neutrophil extracellular trap formation | EPHX1   |
| GeneCards | Neutrophil extracellular trap formation | SLC7A1  |
| GeneCards | Neutrophil extracellular trap formation | PPP1CA  |
| GeneCards | Neutrophil extracellular trap formation | DFFA    |
| GeneCards | Neutrophil extracellular trap formation | KDM1A   |

|           |                                         |           |
|-----------|-----------------------------------------|-----------|
| GeneCards | Neutrophil extracellular trap formation | PPIG      |
| GeneCards | Neutrophil extracellular trap formation | RCVRN     |
| GeneCards | Neutrophil extracellular trap formation | RAB11FIP4 |
| GeneCards | Neutrophil extracellular trap formation | CD300LF   |
| GeneCards | Neutrophil extracellular trap formation | IFNA13    |
| GeneCards | Neutrophil extracellular trap formation | HELZ      |
| GeneCards | Neutrophil extracellular trap formation | FES       |
| GeneCards | Neutrophil extracellular trap formation | STAG3     |
| GeneCards | Neutrophil extracellular trap formation | TNNT1     |
| GeneCards | Neutrophil extracellular trap formation | PERP      |
| GeneCards | Neutrophil extracellular trap formation | TCEA3     |
| GeneCards | Neutrophil extracellular trap formation | ACD       |
| GeneCards | Neutrophil extracellular trap formation | CCT8      |
| GeneCards | Neutrophil extracellular trap formation | CSNK1A1   |
| GeneCards | Neutrophil extracellular trap formation | NETO1     |
| GeneCards | Neutrophil extracellular trap formation | RAD52     |
| GeneCards | Neutrophil extracellular trap formation | HSPA9     |
| GeneCards | Neutrophil extracellular trap formation | FABP5     |
| GeneCards | Neutrophil extracellular trap formation | DNAJB11   |
| GeneCards | Neutrophil extracellular trap formation | NMI       |
| GeneCards | Neutrophil extracellular trap formation | HM13      |
| GeneCards | Neutrophil extracellular trap formation | KDM4C     |

|           |                                         |         |
|-----------|-----------------------------------------|---------|
| GeneCards | Neutrophil extracellular trap formation | SPRED2  |
| GeneCards | Neutrophil extracellular trap formation | PIK3IP1 |
| GeneCards | Neutrophil extracellular trap formation | RORC    |
| GeneCards | Neutrophil extracellular trap formation | PCDH12  |
| GeneCards | Neutrophil extracellular trap formation | SPEF2   |
| GeneCards | Neutrophil extracellular trap formation | ZNF469  |
| GeneCards | Neutrophil extracellular trap formation | TXNIP   |
| GeneCards | Neutrophil extracellular trap formation | HSPA1B  |
| GeneCards | Neutrophil extracellular trap formation | IMPDH2  |
| GeneCards | Neutrophil extracellular trap formation | POMGNT1 |
| GeneCards | Neutrophil extracellular trap formation | KRT16   |
| GeneCards | Neutrophil extracellular trap formation | MYO5A   |
| GeneCards | Neutrophil extracellular trap formation | KCNQ1   |
| GeneCards | Neutrophil extracellular trap formation | ANKRD11 |
| GeneCards | Neutrophil extracellular trap formation | ICAM4   |
| GeneCards | Neutrophil extracellular trap formation | RIOK1   |
| GeneCards | Neutrophil extracellular trap formation | AHSP    |
| GeneCards | Neutrophil extracellular trap formation | MLH1    |
| GeneCards | Neutrophil extracellular trap formation | N4BP2L2 |
| GeneCards | Neutrophil extracellular trap formation | CYP21A2 |
| GeneCards | Neutrophil extracellular trap formation | GSTT1   |
| GeneCards | Neutrophil extracellular trap formation | IL25    |

|           |                                         |           |
|-----------|-----------------------------------------|-----------|
| GeneCards | Neutrophil extracellular trap formation | PHB2      |
| GeneCards | Neutrophil extracellular trap formation | RAB11FIP5 |
| GeneCards | Neutrophil extracellular trap formation | MUC2      |
| GeneCards | Neutrophil extracellular trap formation | HDAC2     |
| GeneCards | Neutrophil extracellular trap formation | CAMK2N2   |
| GeneCards | Neutrophil extracellular trap formation | PSMD2     |
| GeneCards | Neutrophil extracellular trap formation | TELO2     |
| GeneCards | Neutrophil extracellular trap formation | MED22     |
| GeneCards | Neutrophil extracellular trap formation | WWTR1     |
| GeneCards | Neutrophil extracellular trap formation | PIM1      |
| GeneCards | Neutrophil extracellular trap formation | ALDH1A2   |
| GeneCards | Neutrophil extracellular trap formation | STRAP     |
| GeneCards | Neutrophil extracellular trap formation | PTPN9     |
| GeneCards | Neutrophil extracellular trap formation | DDX39B    |
| GeneCards | Neutrophil extracellular trap formation | CYP3A5    |
| GeneCards | Neutrophil extracellular trap formation | CA12      |
| GeneCards | Neutrophil extracellular trap formation | PBX1      |
| GeneCards | Neutrophil extracellular trap formation | ABCB11    |
| GeneCards | Neutrophil extracellular trap formation | NUP188    |
| GeneCards | Neutrophil extracellular trap formation | EPHB1     |
| GeneCards | Neutrophil extracellular trap formation | MED12L    |
| GeneCards | Neutrophil extracellular trap formation | LGI4      |

|           |                                         |         |
|-----------|-----------------------------------------|---------|
| GeneCards | Neutrophil extracellular trap formation | NAB1    |
| GeneCards | Neutrophil extracellular trap formation | CLDN2   |
| GeneCards | Neutrophil extracellular trap formation | CPXM2   |
| GeneCards | Neutrophil extracellular trap formation | IL20RB  |
| GeneCards | Neutrophil extracellular trap formation | FABP12  |
| GeneCards | Neutrophil extracellular trap formation | XPO5    |
| GeneCards | Neutrophil extracellular trap formation | IFT172  |
| GeneCards | Neutrophil extracellular trap formation | GNAZ    |
| GeneCards | Neutrophil extracellular trap formation | CD70    |
| GeneCards | Neutrophil extracellular trap formation | SMARCA2 |
| GeneCards | Neutrophil extracellular trap formation | ELOC    |
| GeneCards | Neutrophil extracellular trap formation | STUB1   |
| GeneCards | Neutrophil extracellular trap formation | FAF2    |
| GeneCards | Neutrophil extracellular trap formation | FOLR1   |
| GeneCards | Neutrophil extracellular trap formation | CRABP1  |
| GeneCards | Neutrophil extracellular trap formation | SLC3A2  |
| GeneCards | Neutrophil extracellular trap formation | GM2A    |
| GeneCards | Neutrophil extracellular trap formation | CAPG    |
| GeneCards | Neutrophil extracellular trap formation | TP53BP1 |
| GeneCards | Neutrophil extracellular trap formation | CPOX    |
| GeneCards | Neutrophil extracellular trap formation | ROBO4   |
| GeneCards | Neutrophil extracellular trap formation | MIR193A |



|           |                                         |         |
|-----------|-----------------------------------------|---------|
| GeneCards | Neutrophil extracellular trap formation | GRIN2D  |
| GeneCards | Neutrophil extracellular trap formation | VPS52   |
| GeneCards | Neutrophil extracellular trap formation | TP53I11 |
| GeneCards | Neutrophil extracellular trap formation | HAUS5   |
| GeneCards | Neutrophil extracellular trap formation | LIMD1   |
| GeneCards | Neutrophil extracellular trap formation | PTRH2   |
| GeneCards | Neutrophil extracellular trap formation | RPL29   |
| GeneCards | Neutrophil extracellular trap formation | CLEC18B |
| GeneCards | Neutrophil extracellular trap formation | STX18   |
| GeneCards | Neutrophil extracellular trap formation | GPX7    |
| GeneCards | Neutrophil extracellular trap formation | DNAJC13 |
| GeneCards | Neutrophil extracellular trap formation | MSH6    |
| GeneCards | Neutrophil extracellular trap formation | UBE2L3  |
| GeneCards | Neutrophil extracellular trap formation | KAZALD1 |
| GeneCards | Neutrophil extracellular trap formation | TNKS    |
| GeneCards | Neutrophil extracellular trap formation | RAD51   |
| GeneCards | Neutrophil extracellular trap formation | MIR424  |
| GeneCards | Neutrophil extracellular trap formation | TTF2    |
| GeneCards | Neutrophil extracellular trap formation | CACNA1A |
| GeneCards | Neutrophil extracellular trap formation | NCLN    |
| GeneCards | Neutrophil extracellular trap formation | HCFC1   |
| GeneCards | Neutrophil extracellular trap formation | CASC3   |

|           |                                         |            |
|-----------|-----------------------------------------|------------|
| GeneCards | Neutrophil extracellular trap formation | LRRC4      |
| GeneCards | Neutrophil extracellular trap formation | MIR214     |
| GeneCards | Neutrophil extracellular trap formation | ATXN2      |
| GeneCards | Neutrophil extracellular trap formation | CDC27      |
| GeneCards | Neutrophil extracellular trap formation | CSGALNACT1 |
| GeneCards | Neutrophil extracellular trap formation | RAB8A      |
| GeneCards | Neutrophil extracellular trap formation | IKZF4      |
| GeneCards | Neutrophil extracellular trap formation | ATP5MC2    |
| GeneCards | Neutrophil extracellular trap formation | ITGB1BP1   |
| GeneCards | Neutrophil extracellular trap formation | RHD        |
| GeneCards | Neutrophil extracellular trap formation | GGT6       |
| GeneCards | Neutrophil extracellular trap formation | SOGA1      |
| GeneCards | Neutrophil extracellular trap formation | MAOB       |
| GeneCards | Neutrophil extracellular trap formation | CMKLR2     |
| GeneCards | Neutrophil extracellular trap formation | ZNF281     |
| GeneCards | Neutrophil extracellular trap formation | ARFGEF1    |
| GeneCards | Neutrophil extracellular trap formation | SCAMP1     |
| GeneCards | Neutrophil extracellular trap formation | MYH10      |
| GeneCards | Neutrophil extracellular trap formation | GEMIN5     |
| GeneCards | Neutrophil extracellular trap formation | AAAS       |
| GeneCards | Neutrophil extracellular trap formation | CNMD       |
| GeneCards | Neutrophil extracellular trap formation | ISLR       |

|           |                                         |        |
|-----------|-----------------------------------------|--------|
| GeneCards | Neutrophil extracellular trap formation | LSR    |
| GeneCards | Neutrophil extracellular trap formation | FST    |
| GeneCards | Neutrophil extracellular trap formation | CCT2   |
| GeneCards | Neutrophil extracellular trap formation | PLXND1 |
| GeneCards | Neutrophil extracellular trap formation | GUCA2A |
| GeneCards | Neutrophil extracellular trap formation | PSMD12 |
| GeneCards | Neutrophil extracellular trap formation | ZGPAT  |
| GeneCards | Neutrophil extracellular trap formation | WLS    |
| GeneCards | Neutrophil extracellular trap formation | OIT3   |
| GeneCards | Neutrophil extracellular trap formation | IFNAR1 |
| GeneCards | Neutrophil extracellular trap formation | NEIL2  |
| GeneCards | Neutrophil extracellular trap formation | CAD    |
| GeneCards | Neutrophil extracellular trap formation | LINGO4 |
| GeneCards | Neutrophil extracellular trap formation | UCP2   |
| GeneCards | Neutrophil extracellular trap formation | CHRM1  |
| GeneCards | Neutrophil extracellular trap formation | TRHDE  |
| GeneCards | Neutrophil extracellular trap formation | VSTM4  |
| GeneCards | Neutrophil extracellular trap formation | TSPAN4 |
| GeneCards | Neutrophil extracellular trap formation | TNIP1  |
| GeneCards | Neutrophil extracellular trap formation | PRMT1  |
| GeneCards | Neutrophil extracellular trap formation | CD99L2 |
| GeneCards | Neutrophil extracellular trap formation | ZAN    |

|           |                                         |          |
|-----------|-----------------------------------------|----------|
| GeneCards | Neutrophil extracellular trap formation | SIRT3    |
| GeneCards | Neutrophil extracellular trap formation | RNH1     |
| GeneCards | Neutrophil extracellular trap formation | TLL1     |
| GeneCards | Neutrophil extracellular trap formation | RAVER1   |
| GeneCards | Neutrophil extracellular trap formation | KLF10    |
| GeneCards | Neutrophil extracellular trap formation | MAGI3    |
| GeneCards | Neutrophil extracellular trap formation | FKBP1A   |
| GeneCards | Neutrophil extracellular trap formation | PDZK1IP1 |
| GeneCards | Neutrophil extracellular trap formation | SLC44A1  |
| GeneCards | Neutrophil extracellular trap formation | ARAF     |
| GeneCards | Neutrophil extracellular trap formation | PINK1    |
| GeneCards | Neutrophil extracellular trap formation | P4HA3    |
| GeneCards | Neutrophil extracellular trap formation | WTAP     |
| GeneCards | Neutrophil extracellular trap formation | MAST2    |
| GeneCards | Neutrophil extracellular trap formation | MEF2A    |
| GeneCards | Neutrophil extracellular trap formation | MIR486-1 |
| GeneCards | Neutrophil extracellular trap formation | PDIA2    |
| GeneCards | Neutrophil extracellular trap formation | MID1IP1  |
| GeneCards | Neutrophil extracellular trap formation | HADHB    |
| GeneCards | Neutrophil extracellular trap formation | PCYOX1L  |
| GeneCards | Neutrophil extracellular trap formation | PDIA6    |
| GeneCards | Neutrophil extracellular trap formation | NDUFS4   |

|           |                                         |        |
|-----------|-----------------------------------------|--------|
| GeneCards | Neutrophil extracellular trap formation | DEK    |
| GeneCards | Neutrophil extracellular trap formation | ENDOU  |
| GeneCards | Neutrophil extracellular trap formation | SEL1L  |
| GeneCards | Neutrophil extracellular trap formation | PDGFC  |
| GeneCards | Neutrophil extracellular trap formation | RFX1   |
| GeneCards | Neutrophil extracellular trap formation | SIL1   |
| GeneCards | Neutrophil extracellular trap formation | NDFIP1 |
| GeneCards | Neutrophil extracellular trap formation | RUSC1  |
| GeneCards | Neutrophil extracellular trap formation | CPEB1  |
| GeneCards | Neutrophil extracellular trap formation | POLR1D |
| GeneCards | Neutrophil extracellular trap formation | MIP    |
| GeneCards | Neutrophil extracellular trap formation | VWDE   |
| GeneCards | Neutrophil extracellular trap formation | COPB1  |
| GeneCards | Neutrophil extracellular trap formation | HINT1  |
| GeneCards | Neutrophil extracellular trap formation | ATXN1  |
| GeneCards | Neutrophil extracellular trap formation | KMT2D  |
| GeneCards | Neutrophil extracellular trap formation | BCAP31 |
| GeneCards | Neutrophil extracellular trap formation | SUPT5H |
| GeneCards | Neutrophil extracellular trap formation | LSM14A |
| GeneCards | Neutrophil extracellular trap formation | GFPT1  |
| GeneCards | Neutrophil extracellular trap formation | CRELD2 |
| GeneCards | Neutrophil extracellular trap formation | SCAMP3 |

|           |                                         |         |
|-----------|-----------------------------------------|---------|
| GeneCards | Neutrophil extracellular trap formation | HNRNPA1 |
| GeneCards | Neutrophil extracellular trap formation | SYTL1   |
| GeneCards | Neutrophil extracellular trap formation | PIGT    |
| GeneCards | Neutrophil extracellular trap formation | PER2    |
| GeneCards | Neutrophil extracellular trap formation | PRND    |
| GeneCards | Neutrophil extracellular trap formation | MYL12B  |
| GeneCards | Neutrophil extracellular trap formation | JDP2    |
| GeneCards | Neutrophil extracellular trap formation | RBM14   |
| GeneCards | Neutrophil extracellular trap formation | NRROS   |
| GeneCards | Neutrophil extracellular trap formation | PRDX5   |
| GeneCards | Neutrophil extracellular trap formation | ARFGAP3 |
| GeneCards | Neutrophil extracellular trap formation | DKK3    |
| GeneCards | Neutrophil extracellular trap formation | TCEA1   |
| GeneCards | Neutrophil extracellular trap formation | CLEC18A |
| GeneCards | Neutrophil extracellular trap formation | PSMG1   |
| GeneCards | Neutrophil extracellular trap formation | SF3A2   |
| GeneCards | Neutrophil extracellular trap formation | CD3E    |
| GeneCards | Neutrophil extracellular trap formation | UBR2    |
| GeneCards | Neutrophil extracellular trap formation | GBE1    |
| GeneCards | Neutrophil extracellular trap formation | TFEC    |
| GeneCards | Neutrophil extracellular trap formation | TFF2    |
| GeneCards | Neutrophil extracellular trap formation | HNRNPH1 |

|           |                                         |         |
|-----------|-----------------------------------------|---------|
| GeneCards | Neutrophil extracellular trap formation | CLIC5   |
| GeneCards | Neutrophil extracellular trap formation | NCKAP1  |
| GeneCards | Neutrophil extracellular trap formation | SUGCT   |
| GeneCards | Neutrophil extracellular trap formation | NIBAN1  |
| GeneCards | Neutrophil extracellular trap formation | KDM5B   |
| GeneCards | Neutrophil extracellular trap formation | ZC3H10  |
| GeneCards | Neutrophil extracellular trap formation | NEDD4   |
| GeneCards | Neutrophil extracellular trap formation | SHMT1   |
| GeneCards | Neutrophil extracellular trap formation | WWP2    |
| GeneCards | Neutrophil extracellular trap formation | USP9X   |
| GeneCards | Neutrophil extracellular trap formation | TK1     |
| GeneCards | Neutrophil extracellular trap formation | RBM4    |
| GeneCards | Neutrophil extracellular trap formation | ETV4    |
| GeneCards | Neutrophil extracellular trap formation | RASSF3  |
| GeneCards | Neutrophil extracellular trap formation | THEM6   |
| GeneCards | Neutrophil extracellular trap formation | IFNA5   |
| GeneCards | Neutrophil extracellular trap formation | TAMM41  |
| GeneCards | Neutrophil extracellular trap formation | MLKL    |
| GeneCards | Neutrophil extracellular trap formation | HBZ     |
| GeneCards | Neutrophil extracellular trap formation | SLC34A1 |
| GeneCards | Neutrophil extracellular trap formation | RPAP3   |
| GeneCards | Neutrophil extracellular trap formation | DNAJC10 |

|           |                                         |           |
|-----------|-----------------------------------------|-----------|
| GeneCards | Neutrophil extracellular trap formation | NEURL4    |
| GeneCards | Neutrophil extracellular trap formation | CTSA      |
| GeneCards | Neutrophil extracellular trap formation | ADCYAP1R1 |
| GeneCards | Neutrophil extracellular trap formation | GP9       |
| GeneCards | Neutrophil extracellular trap formation | SERPINB3  |
| GeneCards | Neutrophil extracellular trap formation | PPT1      |
| GeneCards | Neutrophil extracellular trap formation | MARCHF7   |
| GeneCards | Neutrophil extracellular trap formation | MED31     |
| GeneCards | Neutrophil extracellular trap formation | NEU3      |
| GeneCards | Neutrophil extracellular trap formation | POLR2L    |
| GeneCards | Neutrophil extracellular trap formation | DDX5      |
| GeneCards | Neutrophil extracellular trap formation | PDK2      |
| GeneCards | Neutrophil extracellular trap formation | ATP1B3    |
| GeneCards | Neutrophil extracellular trap formation | CBX3      |
| GeneCards | Neutrophil extracellular trap formation | CHID1     |
| GeneCards | Neutrophil extracellular trap formation | CDK3      |
| GeneCards | Neutrophil extracellular trap formation | PSMD13    |
| GeneCards | Neutrophil extracellular trap formation | G3BP1     |
| GeneCards | Neutrophil extracellular trap formation | MIR26A1   |
| GeneCards | Neutrophil extracellular trap formation | KCNIP3    |
| GeneCards | Neutrophil extracellular trap formation | CLCN4     |
| GeneCards | Neutrophil extracellular trap formation | MED7      |



|           |                                         |          |
|-----------|-----------------------------------------|----------|
| GeneCards | Neutrophil extracellular trap formation | RPL19    |
| GeneCards | Neutrophil extracellular trap formation | CLASP1   |
| GeneCards | Neutrophil extracellular trap formation | NSF      |
| GeneCards | Neutrophil extracellular trap formation | POGLUT3  |
| GeneCards | Neutrophil extracellular trap formation | C7       |
| GeneCards | Neutrophil extracellular trap formation | NOCT     |
| GeneCards | Neutrophil extracellular trap formation | MIR146B  |
| GeneCards | Neutrophil extracellular trap formation | IFNA14   |
| GeneCards | Neutrophil extracellular trap formation | ADH1A    |
| GeneCards | Neutrophil extracellular trap formation | HMGA1    |
| GeneCards | Neutrophil extracellular trap formation | HP1BP3   |
| GeneCards | Neutrophil extracellular trap formation | SLC9A3R2 |
| GeneCards | Neutrophil extracellular trap formation | RRM1     |
| GeneCards | Neutrophil extracellular trap formation | AHCTF1   |
| GeneCards | Neutrophil extracellular trap formation | MAML1    |
| GeneCards | Neutrophil extracellular trap formation | PER1     |
| GeneCards | Neutrophil extracellular trap formation | SMPD3    |
| GeneCards | Neutrophil extracellular trap formation | CNN2     |
| GeneCards | Neutrophil extracellular trap formation | TAP2     |
| GeneCards | Neutrophil extracellular trap formation | SLC27A1  |
| GeneCards | Neutrophil extracellular trap formation | SBSN     |
| GeneCards | Neutrophil extracellular trap formation | GLMP     |

|           |                                         |          |
|-----------|-----------------------------------------|----------|
| GeneCards | Neutrophil extracellular trap formation | ARSA     |
| GeneCards | Neutrophil extracellular trap formation | CABLES1  |
| GeneCards | Neutrophil extracellular trap formation | RTN4R    |
| GeneCards | Neutrophil extracellular trap formation | PMF1     |
| GeneCards | Neutrophil extracellular trap formation | NHEJ1    |
| GeneCards | Neutrophil extracellular trap formation | CLASP2   |
| GeneCards | Neutrophil extracellular trap formation | PSMC3    |
| GeneCards | Neutrophil extracellular trap formation | TUG1     |
| GeneCards | Neutrophil extracellular trap formation | ADGRB1   |
| GeneCards | Neutrophil extracellular trap formation | DPM1     |
| GeneCards | Neutrophil extracellular trap formation | SNX9     |
| GeneCards | Neutrophil extracellular trap formation | SP100    |
| GeneCards | Neutrophil extracellular trap formation | ENTPD8   |
| GeneCards | Neutrophil extracellular trap formation | DYNC1H1  |
| GeneCards | Neutrophil extracellular trap formation | GLE1     |
| GeneCards | Neutrophil extracellular trap formation | HSF1     |
| GeneCards | Neutrophil extracellular trap formation | TRAPPC10 |
| GeneCards | Neutrophil extracellular trap formation | GALK1    |
| GeneCards | Neutrophil extracellular trap formation | ZNF282   |
| GeneCards | Neutrophil extracellular trap formation | SUMF1    |
| GeneCards | Neutrophil extracellular trap formation | DHX15    |
| GeneCards | Neutrophil extracellular trap formation | C1QTNF1  |

|           |                                         |           |
|-----------|-----------------------------------------|-----------|
| GeneCards | Neutrophil extracellular trap formation | MBD2      |
| GeneCards | Neutrophil extracellular trap formation | RTN3      |
| GeneCards | Neutrophil extracellular trap formation | MSTO1     |
| GeneCards | Neutrophil extracellular trap formation | SFXN2     |
| GeneCards | Neutrophil extracellular trap formation | SEPTIN2   |
| GeneCards | Neutrophil extracellular trap formation | WDR26     |
| GeneCards | Neutrophil extracellular trap formation | HSD17B10  |
| GeneCards | Neutrophil extracellular trap formation | TPGS1     |
| GeneCards | Neutrophil extracellular trap formation | GFER      |
| GeneCards | Neutrophil extracellular trap formation | CKB       |
| GeneCards | Neutrophil extracellular trap formation | STAM      |
| GeneCards | Neutrophil extracellular trap formation | DIPK2B    |
| GeneCards | Neutrophil extracellular trap formation | PSMA5     |
| GeneCards | Neutrophil extracellular trap formation | SERINC2   |
| GeneCards | Neutrophil extracellular trap formation | OPTN      |
| GeneCards | Neutrophil extracellular trap formation | IVNS1ABP  |
| GeneCards | Neutrophil extracellular trap formation | MDH2      |
| GeneCards | Neutrophil extracellular trap formation | VTI1B     |
| GeneCards | Neutrophil extracellular trap formation | GAP43     |
| GeneCards | Neutrophil extracellular trap formation | MACROH2A1 |
| GeneCards | Neutrophil extracellular trap formation | NPFF      |
| GeneCards | Neutrophil extracellular trap formation | CYFIP1    |

|           |                                         |          |
|-----------|-----------------------------------------|----------|
| GeneCards | Neutrophil extracellular trap formation | ANAPC5   |
| GeneCards | Neutrophil extracellular trap formation | PLXNB2   |
| GeneCards | Neutrophil extracellular trap formation | UTS2     |
| GeneCards | Neutrophil extracellular trap formation | LIFR     |
| GeneCards | Neutrophil extracellular trap formation | TAS1R2   |
| GeneCards | Neutrophil extracellular trap formation | JADE2    |
| GeneCards | Neutrophil extracellular trap formation | SSTR2    |
| GeneCards | Neutrophil extracellular trap formation | PTPRN    |
| GeneCards | Neutrophil extracellular trap formation | PPARGC1A |
| GeneCards | Neutrophil extracellular trap formation | RAB5C    |
| GeneCards | Neutrophil extracellular trap formation | IGHG2    |
| GeneCards | Neutrophil extracellular trap formation | C1QTNF6  |
| GeneCards | Neutrophil extracellular trap formation | PDCL     |
| GeneCards | Neutrophil extracellular trap formation | ACVR1    |
| GeneCards | Neutrophil extracellular trap formation | SEC16A   |
| GeneCards | Neutrophil extracellular trap formation | EXOC4    |
| GeneCards | Neutrophil extracellular trap formation | SCG3     |
| GeneCards | Neutrophil extracellular trap formation | TPM3     |
| GeneCards | Neutrophil extracellular trap formation | CYP2B6   |
| GeneCards | Neutrophil extracellular trap formation | ABCC3    |
| GeneCards | Neutrophil extracellular trap formation | SERPINA9 |
| GeneCards | Neutrophil extracellular trap formation | CCNC     |

|           |                                         |         |
|-----------|-----------------------------------------|---------|
| GeneCards | Neutrophil extracellular trap formation | JAZF1   |
| GeneCards | Neutrophil extracellular trap formation | AKAP12  |
| GeneCards | Neutrophil extracellular trap formation | AVPR2   |
| GeneCards | Neutrophil extracellular trap formation | ACLY    |
| GeneCards | Neutrophil extracellular trap formation | RASGRP3 |
| GeneCards | Neutrophil extracellular trap formation | KCNV1   |
| GeneCards | Neutrophil extracellular trap formation | DCSTAMP |
| GeneCards | Neutrophil extracellular trap formation | NPEPPS  |
| GeneCards | Neutrophil extracellular trap formation | CAND1   |
| GeneCards | Neutrophil extracellular trap formation | MYO1B   |
| GeneCards | Neutrophil extracellular trap formation | AURKB   |
| GeneCards | Neutrophil extracellular trap formation | FGFBP2  |
| GeneCards | Neutrophil extracellular trap formation | TCEA2   |
| GeneCards | Neutrophil extracellular trap formation | EHMT1   |
| GeneCards | Neutrophil extracellular trap formation | DOK2    |
| GeneCards | Neutrophil extracellular trap formation | RNF128  |
| GeneCards | Neutrophil extracellular trap formation | LRRK1   |
| GeneCards | Neutrophil extracellular trap formation | SLC26A2 |
| GeneCards | Neutrophil extracellular trap formation | PEF1    |
| GeneCards | Neutrophil extracellular trap formation | FADS2   |
| GeneCards | Neutrophil extracellular trap formation | JAM2    |
| GeneCards | Neutrophil extracellular trap formation | FAM3B   |

|           |                                         |         |
|-----------|-----------------------------------------|---------|
| GeneCards | Neutrophil extracellular trap formation | NETO2   |
| GeneCards | Neutrophil extracellular trap formation | LRRTM2  |
| GeneCards | Neutrophil extracellular trap formation | RAD50   |
| GeneCards | Neutrophil extracellular trap formation | CRB1    |
| GeneCards | Neutrophil extracellular trap formation | GPRC5C  |
| GeneCards | Neutrophil extracellular trap formation | HCLS1   |
| GeneCards | Neutrophil extracellular trap formation | SLC36A1 |
| GeneCards | Neutrophil extracellular trap formation | ACACA   |
| GeneCards | Neutrophil extracellular trap formation | GALNT7  |
| GeneCards | Neutrophil extracellular trap formation | DNM1    |
| GeneCards | Neutrophil extracellular trap formation | TMEM38A |
| GeneCards | Neutrophil extracellular trap formation | APLNR   |
| GeneCards | Neutrophil extracellular trap formation | CCDC85C |
| GeneCards | Neutrophil extracellular trap formation | FBXW11  |
| GeneCards | Neutrophil extracellular trap formation | DMXL2   |
| GeneCards | Neutrophil extracellular trap formation | FGF17   |
| GeneCards | Neutrophil extracellular trap formation | CRTC2   |
| GeneCards | Neutrophil extracellular trap formation | IL1F10  |
| GeneCards | Neutrophil extracellular trap formation | LAPTM4B |
| GeneCards | Neutrophil extracellular trap formation | CADM3   |
| GeneCards | Neutrophil extracellular trap formation | MIR141  |
| GeneCards | Neutrophil extracellular trap formation | SLC1A4  |

|           |                                         |         |
|-----------|-----------------------------------------|---------|
| GeneCards | Neutrophil extracellular trap formation | NEGR1   |
| GeneCards | Neutrophil extracellular trap formation | GLUD1   |
| GeneCards | Neutrophil extracellular trap formation | CAPS    |
| GeneCards | Neutrophil extracellular trap formation | RARG    |
| GeneCards | Neutrophil extracellular trap formation | FUT2    |
| GeneCards | Neutrophil extracellular trap formation | MBOAT7  |
| GeneCards | Neutrophil extracellular trap formation | LIME1   |
| GeneCards | Neutrophil extracellular trap formation | UBR4    |
| GeneCards | Neutrophil extracellular trap formation | ZNF446  |
| GeneCards | Neutrophil extracellular trap formation | AP2S1   |
| GeneCards | Neutrophil extracellular trap formation | RNASEL  |
| GeneCards | Neutrophil extracellular trap formation | PAX8    |
| GeneCards | Neutrophil extracellular trap formation | RPL6    |
| GeneCards | Neutrophil extracellular trap formation | ZNF653  |
| GeneCards | Neutrophil extracellular trap formation | CCN5    |
| GeneCards | Neutrophil extracellular trap formation | LRRC8D  |
| GeneCards | Neutrophil extracellular trap formation | NAA16   |
| GeneCards | Neutrophil extracellular trap formation | FAM168A |
| GeneCards | Neutrophil extracellular trap formation | LIMS1   |
| GeneCards | Neutrophil extracellular trap formation | DRAM2   |
| GeneCards | Neutrophil extracellular trap formation | TNFSF15 |
| GeneCards | Neutrophil extracellular trap formation | KIR2DL3 |

|           |                                         |          |
|-----------|-----------------------------------------|----------|
| GeneCards | Neutrophil extracellular trap formation | DVL3     |
| GeneCards | Neutrophil extracellular trap formation | RPS3     |
| GeneCards | Neutrophil extracellular trap formation | ECD      |
| GeneCards | Neutrophil extracellular trap formation | CCNT1    |
| GeneCards | Neutrophil extracellular trap formation | DVL1     |
| GeneCards | Neutrophil extracellular trap formation | GCGR     |
| GeneCards | Neutrophil extracellular trap formation | IFRD2    |
| GeneCards | Neutrophil extracellular trap formation | RAD51B   |
| GeneCards | Neutrophil extracellular trap formation | MSH5     |
| GeneCards | Neutrophil extracellular trap formation | AP1M1    |
| GeneCards | Neutrophil extracellular trap formation | SLC39A14 |
| GeneCards | Neutrophil extracellular trap formation | NFIL3    |
| GeneCards | Neutrophil extracellular trap formation | CDK20    |
| GeneCards | Neutrophil extracellular trap formation | NUP210   |
| GeneCards | Neutrophil extracellular trap formation | BCS1L    |
| GeneCards | Neutrophil extracellular trap formation | BTN3A1   |
| GeneCards | Neutrophil extracellular trap formation | HES1     |
| GeneCards | Neutrophil extracellular trap formation | SIGLEC1  |
| GeneCards | Neutrophil extracellular trap formation | C1QTNF9  |
| GeneCards | Neutrophil extracellular trap formation | ZNF622   |
| GeneCards | Neutrophil extracellular trap formation | ZNF227   |
| GeneCards | Neutrophil extracellular trap formation | RNF19A   |



|           |                                         |          |
|-----------|-----------------------------------------|----------|
| GeneCards | Neutrophil extracellular trap formation | CNOT6    |
| GeneCards | Neutrophil extracellular trap formation | DHR SX   |
| GeneCards | Neutrophil extracellular trap formation | ZNHIT6   |
| GeneCards | Neutrophil extracellular trap formation | PCSK1    |
| GeneCards | Neutrophil extracellular trap formation | CHKA     |
| GeneCards | Neutrophil extracellular trap formation | PNPLA6   |
| GeneCards | Neutrophil extracellular trap formation | PBX3     |
| GeneCards | Neutrophil extracellular trap formation | COBL     |
| GeneCards | Neutrophil extracellular trap formation | UBA2     |
| GeneCards | Neutrophil extracellular trap formation | ATP6V1B2 |
| GeneCards | Neutrophil extracellular trap formation | RPE      |
| GeneCards | Neutrophil extracellular trap formation | IQC N    |
| GeneCards | Neutrophil extracellular trap formation | RBCK1    |
| GeneCards | Neutrophil extracellular trap formation | SIPA1L2  |
| GeneCards | Neutrophil extracellular trap formation | RGS10    |
| GeneCards | Neutrophil extracellular trap formation | SPEN     |
| GeneCards | Neutrophil extracellular trap formation | PA2G4    |
| GeneCards | Neutrophil extracellular trap formation | FADS1    |
| GeneCards | Neutrophil extracellular trap formation | BCL2L2   |
| GeneCards | Neutrophil extracellular trap formation | SUSD1    |
| GeneCards | Neutrophil extracellular trap formation | DSN1     |
| GeneCards | Neutrophil extracellular trap formation | POGLUT1  |

|           |                                         |         |
|-----------|-----------------------------------------|---------|
| GeneCards | Neutrophil extracellular trap formation | RELL2   |
| GeneCards | Neutrophil extracellular trap formation | MED19   |
| GeneCards | Neutrophil extracellular trap formation | NUP153  |
| GeneCards | Neutrophil extracellular trap formation | NUBP2   |
| GeneCards | Neutrophil extracellular trap formation | GIGYF2  |
| GeneCards | Neutrophil extracellular trap formation | PHACTR4 |
| GeneCards | Neutrophil extracellular trap formation | NXP3    |
| GeneCards | Neutrophil extracellular trap formation | BACE2   |
| GeneCards | Neutrophil extracellular trap formation | TOR2A   |
| GeneCards | Neutrophil extracellular trap formation | GID8    |
| GeneCards | Neutrophil extracellular trap formation | PTPN23  |
| GeneCards | Neutrophil extracellular trap formation | HEBP2   |
| GeneCards | Neutrophil extracellular trap formation | ZFYVE9  |
| GeneCards | Neutrophil extracellular trap formation | CAP1    |
| GeneCards | Neutrophil extracellular trap formation | ZNF225  |
| GeneCards | Neutrophil extracellular trap formation | ALOX15  |
| GeneCards | Neutrophil extracellular trap formation | PABPN1  |
| GeneCards | Neutrophil extracellular trap formation | KIF5B   |
| GeneCards | Neutrophil extracellular trap formation | FGFRL1  |
| GeneCards | Neutrophil extracellular trap formation | AKAP10  |
| GeneCards | Neutrophil extracellular trap formation | CDC20   |
| GeneCards | Neutrophil extracellular trap formation | PIGA    |

|           |                                         |          |
|-----------|-----------------------------------------|----------|
| GeneCards | Neutrophil extracellular trap formation | MEGF8    |
| GeneCards | Neutrophil extracellular trap formation | MGMT     |
| GeneCards | Neutrophil extracellular trap formation | C17orf99 |
| GeneCards | Neutrophil extracellular trap formation | UBE2D2   |
| GeneCards | Neutrophil extracellular trap formation | APOC3    |
| GeneCards | Neutrophil extracellular trap formation | SAMD4B   |
| GeneCards | Neutrophil extracellular trap formation | PSMD14   |
| GeneCards | Neutrophil extracellular trap formation | LMAN2L   |
| GeneCards | Neutrophil extracellular trap formation | H3-3A    |
| GeneCards | Neutrophil extracellular trap formation | DNASE2   |
| GeneCards | Neutrophil extracellular trap formation | LILRA3   |
| GeneCards | Neutrophil extracellular trap formation | SLC23A2  |
| GeneCards | Neutrophil extracellular trap formation | PNKD     |
| GeneCards | Neutrophil extracellular trap formation | ARHGAP45 |
| GeneCards | Neutrophil extracellular trap formation | EEF1D    |
| GeneCards | Neutrophil extracellular trap formation | MARK4    |
| GeneCards | Neutrophil extracellular trap formation | MUC15    |
| GeneCards | Neutrophil extracellular trap formation | GLI3     |
| GeneCards | Neutrophil extracellular trap formation | HSPBP1   |
| GeneCards | Neutrophil extracellular trap formation | PPM1A    |
| GeneCards | Neutrophil extracellular trap formation | C9       |
| GeneCards | Neutrophil extracellular trap formation | EPHX2    |

|           |                                         |         |
|-----------|-----------------------------------------|---------|
| GeneCards | Neutrophil extracellular trap formation | TMED10  |
| GeneCards | Neutrophil extracellular trap formation | HYOU1   |
| GeneCards | Neutrophil extracellular trap formation | TPRA1   |
| GeneCards | Neutrophil extracellular trap formation | CLMP    |
| GeneCards | Neutrophil extracellular trap formation | RELL1   |
| GeneCards | Neutrophil extracellular trap formation | ZNF410  |
| GeneCards | Neutrophil extracellular trap formation | DAGLB   |
| GeneCards | Neutrophil extracellular trap formation | MCOLN3  |
| GeneCards | Neutrophil extracellular trap formation | KCNK3   |
| GeneCards | Neutrophil extracellular trap formation | DDC     |
| GeneCards | Neutrophil extracellular trap formation | ASH1L   |
| GeneCards | Neutrophil extracellular trap formation | SCGB3A1 |
| GeneCards | Neutrophil extracellular trap formation | SLC27A4 |
| GeneCards | Neutrophil extracellular trap formation | NSMCE2  |
| GeneCards | Neutrophil extracellular trap formation | SLC26A4 |
| GeneCards | Neutrophil extracellular trap formation | PLA2G15 |
| GeneCards | Neutrophil extracellular trap formation | LYPD5   |
| GeneCards | Neutrophil extracellular trap formation | FAM20A  |
| GeneCards | Neutrophil extracellular trap formation | CYP2E1  |
| GeneCards | Neutrophil extracellular trap formation | IL17RB  |
| GeneCards | Neutrophil extracellular trap formation | LYPD8   |
| GeneCards | Neutrophil extracellular trap formation | HADHA   |

|           |                                         |          |
|-----------|-----------------------------------------|----------|
| GeneCards | Neutrophil extracellular trap formation | NCOA1    |
| GeneCards | Neutrophil extracellular trap formation | TGS1     |
| GeneCards | Neutrophil extracellular trap formation | MIR128-1 |
| GeneCards | Neutrophil extracellular trap formation | SUSD4    |
| GeneCards | Neutrophil extracellular trap formation | SLC25A13 |
| GeneCards | Neutrophil extracellular trap formation | OSBPL1A  |
| GeneCards | Neutrophil extracellular trap formation | IL17RD   |
| GeneCards | Neutrophil extracellular trap formation | HOXA10   |
| GeneCards | Neutrophil extracellular trap formation | SLC39A7  |
| GeneCards | Neutrophil extracellular trap formation | GABRQ    |
| GeneCards | Neutrophil extracellular trap formation | SPTLC1   |
| GeneCards | Neutrophil extracellular trap formation | RNF40    |
| GeneCards | Neutrophil extracellular trap formation | OGG1     |
| GeneCards | Neutrophil extracellular trap formation | CAMK2A   |
| GeneCards | Neutrophil extracellular trap formation | SEMA4B   |
| GeneCards | Neutrophil extracellular trap formation | GTF3C2   |
| GeneCards | Neutrophil extracellular trap formation | RARS1    |
| GeneCards | Neutrophil extracellular trap formation | NRM      |
| GeneCards | Neutrophil extracellular trap formation | WDR4     |
| GeneCards | Neutrophil extracellular trap formation | ATP1B1   |
| GeneCards | Neutrophil extracellular trap formation | PLAA     |
| GeneCards | Neutrophil extracellular trap formation | ATAD3B   |

|           |                                         |         |
|-----------|-----------------------------------------|---------|
| GeneCards | Neutrophil extracellular trap formation | ITM2C   |
| GeneCards | Neutrophil extracellular trap formation | ZEB1    |
| GeneCards | Neutrophil extracellular trap formation | GRHL2   |
| GeneCards | Neutrophil extracellular trap formation | STK19   |
| GeneCards | Neutrophil extracellular trap formation | DMKN    |
| GeneCards | Neutrophil extracellular trap formation | SLC39A1 |
| GeneCards | Neutrophil extracellular trap formation | CTPS1   |
| GeneCards | Neutrophil extracellular trap formation | ATXN3   |
| GeneCards | Neutrophil extracellular trap formation | TBC1D9B |
| GeneCards | Neutrophil extracellular trap formation | ARID5B  |
| GeneCards | Neutrophil extracellular trap formation | KANK1   |
| GeneCards | Neutrophil extracellular trap formation | GOLGA4  |
| GeneCards | Neutrophil extracellular trap formation | GPAA1   |
| GeneCards | Neutrophil extracellular trap formation | IL34    |
| GeneCards | Neutrophil extracellular trap formation | DCP1A   |
| GeneCards | Neutrophil extracellular trap formation | CHD4    |
| GeneCards | Neutrophil extracellular trap formation | CLK2    |
| GeneCards | Neutrophil extracellular trap formation | ROBO1   |
| GeneCards | Neutrophil extracellular trap formation | KIR3DL1 |
| GeneCards | Neutrophil extracellular trap formation | LRRC25  |
| GeneCards | Neutrophil extracellular trap formation | GANAB   |
| GeneCards | Neutrophil extracellular trap formation | ARID2   |

|           |                                         |         |
|-----------|-----------------------------------------|---------|
| GeneCards | Neutrophil extracellular trap formation | EXOC7   |
| GeneCards | Neutrophil extracellular trap formation | SENP1   |
| GeneCards | Neutrophil extracellular trap formation | KCNE2   |
| GeneCards | Neutrophil extracellular trap formation | MED25   |
| GeneCards | Neutrophil extracellular trap formation | VASN    |
| GeneCards | Neutrophil extracellular trap formation | CCBE1   |
| GeneCards | Neutrophil extracellular trap formation | B3GNT3  |
| GeneCards | Neutrophil extracellular trap formation | HDAC5   |
| GeneCards | Neutrophil extracellular trap formation | PFN2    |
| GeneCards | Neutrophil extracellular trap formation | DENND4A |
| GeneCards | Neutrophil extracellular trap formation | MIR20A  |
| GeneCards | Neutrophil extracellular trap formation | FAM234A |
| GeneCards | Neutrophil extracellular trap formation | STAU1   |
| GeneCards | Neutrophil extracellular trap formation | NAPG    |
| GeneCards | Neutrophil extracellular trap formation | DUSP13  |
| GeneCards | Neutrophil extracellular trap formation | GPBP1L1 |
| GeneCards | Neutrophil extracellular trap formation | XRN1    |
| GeneCards | Neutrophil extracellular trap formation | CTCF    |
| GeneCards | Neutrophil extracellular trap formation | APRT    |
| GeneCards | Neutrophil extracellular trap formation | SGCE    |
| GeneCards | Neutrophil extracellular trap formation | MAML3   |
| GeneCards | Neutrophil extracellular trap formation | EXT2    |

|           |                                         |          |
|-----------|-----------------------------------------|----------|
| GeneCards | Neutrophil extracellular trap formation | SPACA4   |
| GeneCards | Neutrophil extracellular trap formation | SYMPK    |
| GeneCards | Neutrophil extracellular trap formation | MEIS1    |
| GeneCards | Neutrophil extracellular trap formation | GPN2     |
| GeneCards | Neutrophil extracellular trap formation | STC2     |
| GeneCards | Neutrophil extracellular trap formation | NR1H3    |
| GeneCards | Neutrophil extracellular trap formation | SMG7     |
| GeneCards | Neutrophil extracellular trap formation | WNK1     |
| GeneCards | Neutrophil extracellular trap formation | JADE1    |
| GeneCards | Neutrophil extracellular trap formation | MCM4     |
| GeneCards | Neutrophil extracellular trap formation | NEB      |
| GeneCards | Neutrophil extracellular trap formation | ADIPOR1  |
| GeneCards | Neutrophil extracellular trap formation | MIR196A1 |
| GeneCards | Neutrophil extracellular trap formation | WAC      |
| GeneCards | Neutrophil extracellular trap formation | MIR222   |
| GeneCards | Neutrophil extracellular trap formation | SDF4     |
| GeneCards | Neutrophil extracellular trap formation | GTF2A1   |
| GeneCards | Neutrophil extracellular trap formation | ARIH1    |
| GeneCards | Neutrophil extracellular trap formation | LRRC41   |
| GeneCards | Neutrophil extracellular trap formation | GDPD5    |
| GeneCards | Neutrophil extracellular trap formation | MIR23B   |
| GeneCards | Neutrophil extracellular trap formation | CLSPN    |



|           |                                         |         |
|-----------|-----------------------------------------|---------|
| GeneCards | Neutrophil extracellular trap formation | ZFP57   |
| GeneCards | Neutrophil extracellular trap formation | STX16   |
| GeneCards | Neutrophil extracellular trap formation | NUP93   |
| GeneCards | Neutrophil extracellular trap formation | ACSL1   |
| GeneCards | Neutrophil extracellular trap formation | ARMC8   |
| GeneCards | Neutrophil extracellular trap formation | GCLC    |
| GeneCards | Neutrophil extracellular trap formation | SRSF5   |
| GeneCards | Neutrophil extracellular trap formation | NF2     |
| GeneCards | Neutrophil extracellular trap formation | PSD4    |
| GeneCards | Neutrophil extracellular trap formation | SLC35E3 |
| GeneCards | Neutrophil extracellular trap formation | GPM6A   |
| GeneCards | Neutrophil extracellular trap formation | ECPAS   |
| GeneCards | Neutrophil extracellular trap formation | BICD2   |
| GeneCards | Neutrophil extracellular trap formation | SPX     |
| GeneCards | Neutrophil extracellular trap formation | LDLRAD3 |
| GeneCards | Neutrophil extracellular trap formation | POFUT1  |
| GeneCards | Neutrophil extracellular trap formation | SDSL    |
| GeneCards | Neutrophil extracellular trap formation | PLK1    |
| GeneCards | Neutrophil extracellular trap formation | DCTN4   |
| GeneCards | Neutrophil extracellular trap formation | TFEB    |
| GeneCards | Neutrophil extracellular trap formation | TUFM    |
| GeneCards | Neutrophil extracellular trap formation | BMPR1B  |

|           |                                         |         |
|-----------|-----------------------------------------|---------|
| GeneCards | Neutrophil extracellular trap formation | AGL     |
| GeneCards | Neutrophil extracellular trap formation | DOCK3   |
| GeneCards | Neutrophil extracellular trap formation | GK2     |
| GeneCards | Neutrophil extracellular trap formation | MEX3A   |
| GeneCards | Neutrophil extracellular trap formation | HMGN1   |
| GeneCards | Neutrophil extracellular trap formation | ADRA1A  |
| GeneCards | Neutrophil extracellular trap formation | USP34   |
| GeneCards | Neutrophil extracellular trap formation | EDEM1   |
| GeneCards | Neutrophil extracellular trap formation | CHCHD3  |
| GeneCards | Neutrophil extracellular trap formation | TUBB4B  |
| GeneCards | Neutrophil extracellular trap formation | MRE11   |
| GeneCards | Neutrophil extracellular trap formation | TFIP11  |
| GeneCards | Neutrophil extracellular trap formation | LRIG3   |
| GeneCards | Neutrophil extracellular trap formation | FGF18   |
| GeneCards | Neutrophil extracellular trap formation | CYP1A2  |
| GeneCards | Neutrophil extracellular trap formation | TRIM26  |
| GeneCards | Neutrophil extracellular trap formation | CALML5  |
| GeneCards | Neutrophil extracellular trap formation | USP47   |
| GeneCards | Neutrophil extracellular trap formation | TCF7L2  |
| GeneCards | Neutrophil extracellular trap formation | RNASEH1 |
| GeneCards | Neutrophil extracellular trap formation | MAST3   |
| GeneCards | Neutrophil extracellular trap formation | LZTR1   |

|           |                                         |         |
|-----------|-----------------------------------------|---------|
| GeneCards | Neutrophil extracellular trap formation | SHB     |
| GeneCards | Neutrophil extracellular trap formation | CD2AP   |
| GeneCards | Neutrophil extracellular trap formation | SLC24A4 |
| GeneCards | Neutrophil extracellular trap formation | EHMT2   |
| GeneCards | Neutrophil extracellular trap formation | TUT4    |
| GeneCards | Neutrophil extracellular trap formation | TRAFD1  |
| GeneCards | Neutrophil extracellular trap formation | MIR423  |
| GeneCards | Neutrophil extracellular trap formation | PEAR1   |
| GeneCards | Neutrophil extracellular trap formation | PUM1    |
| GeneCards | Neutrophil extracellular trap formation | WWOX    |
| GeneCards | Neutrophil extracellular trap formation | NEDD8   |
| GeneCards | Neutrophil extracellular trap formation | NOP2    |
| GeneCards | Neutrophil extracellular trap formation | PITX1   |
| GeneCards | Neutrophil extracellular trap formation | COQ8A   |
| GeneCards | Neutrophil extracellular trap formation | BRICD5  |
| GeneCards | Neutrophil extracellular trap formation | DLL4    |
| GeneCards | Neutrophil extracellular trap formation | KLK5    |
| GeneCards | Neutrophil extracellular trap formation | NFKBIZ  |
| GeneCards | Neutrophil extracellular trap formation | PLIN3   |
| GeneCards | Neutrophil extracellular trap formation | FZR1    |
| GeneCards | Neutrophil extracellular trap formation | PPIL2   |
| GeneCards | Neutrophil extracellular trap formation | MSX2    |

|           |                                         |          |
|-----------|-----------------------------------------|----------|
| GeneCards | Neutrophil extracellular trap formation | MIR125B1 |
| GeneCards | Neutrophil extracellular trap formation | UTP4     |
| GeneCards | Neutrophil extracellular trap formation | VKORC1L1 |
| GeneCards | Neutrophil extracellular trap formation | STK26    |
| GeneCards | Neutrophil extracellular trap formation | RPS11    |
| GeneCards | Neutrophil extracellular trap formation | FDFT1    |
| GeneCards | Neutrophil extracellular trap formation | GRB10    |
| GeneCards | Neutrophil extracellular trap formation | H4-16    |
| GeneCards | Neutrophil extracellular trap formation | H4C15    |
| GeneCards | Neutrophil extracellular trap formation | E4F1     |
| GeneCards | Neutrophil extracellular trap formation | SH3BP1   |
| GeneCards | Neutrophil extracellular trap formation | USP15    |
| GeneCards | Neutrophil extracellular trap formation | CAPZA1   |
| GeneCards | Neutrophil extracellular trap formation | EMC1     |
| GeneCards | Neutrophil extracellular trap formation | NMD3     |
| GeneCards | Neutrophil extracellular trap formation | HNRNPU   |
| GeneCards | Neutrophil extracellular trap formation | RAB5B    |
| GeneCards | Neutrophil extracellular trap formation | PAX7     |
| GeneCards | Neutrophil extracellular trap formation | FAF1     |
| GeneCards | Neutrophil extracellular trap formation | HAND1    |
| GeneCards | Neutrophil extracellular trap formation | ANGPTL1  |
| GeneCards | Neutrophil extracellular trap formation | TIRAP    |

|           |                                         |         |
|-----------|-----------------------------------------|---------|
| GeneCards | Neutrophil extracellular trap formation | ZNF593  |
| GeneCards | Neutrophil extracellular trap formation | EIF3A   |
| GeneCards | Neutrophil extracellular trap formation | MIR15A  |
| GeneCards | Neutrophil extracellular trap formation | FZD3    |
| GeneCards | Neutrophil extracellular trap formation | RHOT2   |
| GeneCards | Neutrophil extracellular trap formation | RPL8    |
| GeneCards | Neutrophil extracellular trap formation | TMPRSS4 |
| GeneCards | Neutrophil extracellular trap formation | KRT14   |
| GeneCards | Neutrophil extracellular trap formation | APOO    |
| GeneCards | Neutrophil extracellular trap formation | PTGES3  |
| GeneCards | Neutrophil extracellular trap formation | NR5A1   |
| GeneCards | Neutrophil extracellular trap formation | WDR6    |
| GeneCards | Neutrophil extracellular trap formation | UBB     |
| GeneCards | Neutrophil extracellular trap formation | HNRNPC  |
| GeneCards | Neutrophil extracellular trap formation | MEST    |
| GeneCards | Neutrophil extracellular trap formation | FAM180A |
| GeneCards | Neutrophil extracellular trap formation | LUC7L3  |
| GeneCards | Neutrophil extracellular trap formation | QSOX2   |
| GeneCards | Neutrophil extracellular trap formation | PAM     |
| GeneCards | Neutrophil extracellular trap formation | LEPROT  |
| GeneCards | Neutrophil extracellular trap formation | MYO1C   |
| GeneCards | Neutrophil extracellular trap formation | MDGA2   |

|           |                                         |           |
|-----------|-----------------------------------------|-----------|
| GeneCards | Neutrophil extracellular trap formation | ATOX1     |
| GeneCards | Neutrophil extracellular trap formation | MTAP      |
| GeneCards | Neutrophil extracellular trap formation | SMURF2    |
| GeneCards | Neutrophil extracellular trap formation | KCNK2     |
| GeneCards | Neutrophil extracellular trap formation | CNTNAP2   |
| GeneCards | Neutrophil extracellular trap formation | RPL18A    |
| GeneCards | Neutrophil extracellular trap formation | DNAJB1    |
| GeneCards | Neutrophil extracellular trap formation | NTAN1     |
| GeneCards | Neutrophil extracellular trap formation | ATP5IF1   |
| GeneCards | Neutrophil extracellular trap formation | RNF168    |
| GeneCards | Neutrophil extracellular trap formation | RBM17     |
| GeneCards | Neutrophil extracellular trap formation | ATF4      |
| GeneCards | Neutrophil extracellular trap formation | ATP8A1    |
| GeneCards | Neutrophil extracellular trap formation | TPBG      |
| GeneCards | Neutrophil extracellular trap formation | EPS15L1   |
| GeneCards | Neutrophil extracellular trap formation | HSP90AA2P |
| GeneCards | Neutrophil extracellular trap formation | SH2D4B    |
| GeneCards | Neutrophil extracellular trap formation | PEAK1     |
| GeneCards | Neutrophil extracellular trap formation | PPP6R3    |
| GeneCards | Neutrophil extracellular trap formation | MRGPRF    |
| GeneCards | Neutrophil extracellular trap formation | ERO1A     |
| GeneCards | Neutrophil extracellular trap formation | SLAMF8    |

|           |                                         |          |
|-----------|-----------------------------------------|----------|
| GeneCards | Neutrophil extracellular trap formation | ZEB2     |
| GeneCards | Neutrophil extracellular trap formation | MAVS     |
| GeneCards | Neutrophil extracellular trap formation | DHRS7B   |
| GeneCards | Neutrophil extracellular trap formation | DNAJA2   |
| GeneCards | Neutrophil extracellular trap formation | MACROD2  |
| GeneCards | Neutrophil extracellular trap formation | APBB2    |
| GeneCards | Neutrophil extracellular trap formation | COLGALT2 |
| GeneCards | Neutrophil extracellular trap formation | ANKFY1   |
| GeneCards | Neutrophil extracellular trap formation | ELOB     |
| GeneCards | Neutrophil extracellular trap formation | OLFML1   |
| GeneCards | Neutrophil extracellular trap formation | PODXL2   |
| GeneCards | Neutrophil extracellular trap formation | ZRANB1   |
| GeneCards | Neutrophil extracellular trap formation | NR4A1    |
| GeneCards | Neutrophil extracellular trap formation | CYB5R3   |
| GeneCards | Neutrophil extracellular trap formation | NUP107   |
| GeneCards | Neutrophil extracellular trap formation | ATXN10   |
| GeneCards | Neutrophil extracellular trap formation | TOP3B    |
| GeneCards | Neutrophil extracellular trap formation | FCN3     |
| GeneCards | Neutrophil extracellular trap formation | RETNLB   |
| GeneCards | Neutrophil extracellular trap formation | LNX1     |
| GeneCards | Neutrophil extracellular trap formation | MIR3146  |
| GeneCards | Neutrophil extracellular trap formation | CNOT1    |

|           |                                         |          |
|-----------|-----------------------------------------|----------|
| GeneCards | Neutrophil extracellular trap formation | IGHA1    |
| GeneCards | Neutrophil extracellular trap formation | RBM6     |
| GeneCards | Neutrophil extracellular trap formation | LCT      |
| GeneCards | Neutrophil extracellular trap formation | TREML1   |
| GeneCards | Neutrophil extracellular trap formation | SPATA6   |
| GeneCards | Neutrophil extracellular trap formation | MED28    |
| GeneCards | Neutrophil extracellular trap formation | JCAD     |
| GeneCards | Neutrophil extracellular trap formation | PPP3CB   |
| GeneCards | Neutrophil extracellular trap formation | PPP1R8   |
| GeneCards | Neutrophil extracellular trap formation | C1QTNF2  |
| GeneCards | Neutrophil extracellular trap formation | ITPKC    |
| GeneCards | Neutrophil extracellular trap formation | SPATA5   |
| GeneCards | Neutrophil extracellular trap formation | EHD2     |
| GeneCards | Neutrophil extracellular trap formation | AUH      |
| GeneCards | Neutrophil extracellular trap formation | MOGS     |
| GeneCards | Neutrophil extracellular trap formation | MIR181A2 |
| GeneCards | Neutrophil extracellular trap formation | SLC48A1  |
| GeneCards | Neutrophil extracellular trap formation | USP37    |
| GeneCards | Neutrophil extracellular trap formation | SEMA4F   |
| GeneCards | Neutrophil extracellular trap formation | COQ8B    |
| GeneCards | Neutrophil extracellular trap formation | AMT      |
| GeneCards | Neutrophil extracellular trap formation | ARMC9    |



|           |                                         |         |
|-----------|-----------------------------------------|---------|
| GeneCards | Neutrophil extracellular trap formation | BLM     |
| GeneCards | Neutrophil extracellular trap formation | UBE2D3  |
| GeneCards | Neutrophil extracellular trap formation | PTP4A2  |
| GeneCards | Neutrophil extracellular trap formation | MYL6    |
| GeneCards | Neutrophil extracellular trap formation | SUZ12   |
| GeneCards | Neutrophil extracellular trap formation | DNAJC7  |
| GeneCards | Neutrophil extracellular trap formation | GCDH    |
| GeneCards | Neutrophil extracellular trap formation | VPS4B   |
| GeneCards | Neutrophil extracellular trap formation | AOX1    |
| GeneCards | Neutrophil extracellular trap formation | SEMA4A  |
| GeneCards | Neutrophil extracellular trap formation | FOSB    |
| GeneCards | Neutrophil extracellular trap formation | UCHL1   |
| GeneCards | Neutrophil extracellular trap formation | MIR31   |
| GeneCards | Neutrophil extracellular trap formation | CCDC86  |
| GeneCards | Neutrophil extracellular trap formation | RANGAP1 |
| GeneCards | Neutrophil extracellular trap formation | MBD4    |
| GeneCards | Neutrophil extracellular trap formation | CHEK2   |
| GeneCards | Neutrophil extracellular trap formation | NFATC3  |
| GeneCards | Neutrophil extracellular trap formation | CSNK1E  |
| GeneCards | Neutrophil extracellular trap formation | TRIP10  |
| GeneCards | Neutrophil extracellular trap formation | YES1    |
| GeneCards | Neutrophil extracellular trap formation | ANKS1A  |

|           |                                         |          |
|-----------|-----------------------------------------|----------|
| GeneCards | Neutrophil extracellular trap formation | HSPA6    |
| GeneCards | Neutrophil extracellular trap formation | NDUFS2   |
| GeneCards | Neutrophil extracellular trap formation | CLN6     |
| GeneCards | Neutrophil extracellular trap formation | SH3BP2   |
| GeneCards | Neutrophil extracellular trap formation | KIF11    |
| GeneCards | Neutrophil extracellular trap formation | PAAF1    |
| GeneCards | Neutrophil extracellular trap formation | CHD1     |
| GeneCards | Neutrophil extracellular trap formation | MED11    |
| GeneCards | Neutrophil extracellular trap formation | CALB1    |
| GeneCards | Neutrophil extracellular trap formation | PLXDC2   |
| GeneCards | Neutrophil extracellular trap formation | CADM1    |
| GeneCards | Neutrophil extracellular trap formation | AFDN     |
| GeneCards | Neutrophil extracellular trap formation | SIGLEC10 |
| GeneCards | Neutrophil extracellular trap formation | FXYD5    |
| GeneCards | Neutrophil extracellular trap formation | DDB1     |
| GeneCards | Neutrophil extracellular trap formation | CHPT1    |
| GeneCards | Neutrophil extracellular trap formation | INTS9    |
| GeneCards | Neutrophil extracellular trap formation | RNF4     |
| GeneCards | Neutrophil extracellular trap formation | ROR2     |
| GeneCards | Neutrophil extracellular trap formation | TMEM87A  |
| GeneCards | Neutrophil extracellular trap formation | TYMS     |
| GeneCards | Neutrophil extracellular trap formation | HOXA9    |

|           |                                         |         |
|-----------|-----------------------------------------|---------|
| GeneCards | Neutrophil extracellular trap formation | IMMT    |
| GeneCards | Neutrophil extracellular trap formation | BICRAL  |
| GeneCards | Neutrophil extracellular trap formation | RAPGEF2 |
| GeneCards | Neutrophil extracellular trap formation | CLASRP  |
| GeneCards | Neutrophil extracellular trap formation | APOA5   |
| GeneCards | Neutrophil extracellular trap formation | PRXL2A  |
| GeneCards | Neutrophil extracellular trap formation | TM9SF2  |
| GeneCards | Neutrophil extracellular trap formation | GLB1L2  |
| GeneCards | Neutrophil extracellular trap formation | TECR    |
| GeneCards | Neutrophil extracellular trap formation | LCOR    |
| GeneCards | Neutrophil extracellular trap formation | LRPPRC  |
| GeneCards | Neutrophil extracellular trap formation | RPTOR   |
| GeneCards | Neutrophil extracellular trap formation | ATN1    |
| GeneCards | Neutrophil extracellular trap formation | MASTL   |
| GeneCards | Neutrophil extracellular trap formation | ZNF395  |
| GeneCards | Neutrophil extracellular trap formation | RNF145  |
| GeneCards | Neutrophil extracellular trap formation | PSMD1   |
| GeneCards | Neutrophil extracellular trap formation | PKN2    |
| GeneCards | Neutrophil extracellular trap formation | OLFM3   |
| GeneCards | Neutrophil extracellular trap formation | ATP2C1  |
| GeneCards | Neutrophil extracellular trap formation | PLCH1   |
| GeneCards | Neutrophil extracellular trap formation | ACSL4   |

|           |                                         |          |
|-----------|-----------------------------------------|----------|
| GeneCards | Neutrophil extracellular trap formation | CRAT     |
| GeneCards | Neutrophil extracellular trap formation | FTO      |
| GeneCards | Neutrophil extracellular trap formation | ZG16B    |
| GeneCards | Neutrophil extracellular trap formation | BANF1    |
| GeneCards | Neutrophil extracellular trap formation | LYPD4    |
| GeneCards | Neutrophil extracellular trap formation | PFDN5    |
| GeneCards | Neutrophil extracellular trap formation | IFI27    |
| GeneCards | Neutrophil extracellular trap formation | TBC1D10A |
| GeneCards | Neutrophil extracellular trap formation | ALG2     |
| GeneCards | Neutrophil extracellular trap formation | EPS15    |
| GeneCards | Neutrophil extracellular trap formation | SLC25A24 |
| GeneCards | Neutrophil extracellular trap formation | MROH1    |
| GeneCards | Neutrophil extracellular trap formation | GATA6    |
| GeneCards | Neutrophil extracellular trap formation | RGS4     |
| GeneCards | Neutrophil extracellular trap formation | BAALC    |
| GeneCards | Neutrophil extracellular trap formation | RABEP1   |
| GeneCards | Neutrophil extracellular trap formation | NGB      |
| GeneCards | Neutrophil extracellular trap formation | ALG1     |
| GeneCards | Neutrophil extracellular trap formation | SCN3B    |
| GeneCards | Neutrophil extracellular trap formation | TRIM33   |
| GeneCards | Neutrophil extracellular trap formation | SLC38A1  |
| GeneCards | Neutrophil extracellular trap formation | MTPAP    |

|           |                                         |         |
|-----------|-----------------------------------------|---------|
| GeneCards | Neutrophil extracellular trap formation | CYP4F12 |
| GeneCards | Neutrophil extracellular trap formation | TMEM52B |
| GeneCards | Neutrophil extracellular trap formation | ADRA2B  |
| GeneCards | Neutrophil extracellular trap formation | ELOVL5  |
| GeneCards | Neutrophil extracellular trap formation | HNF1B   |
| GeneCards | Neutrophil extracellular trap formation | IL27RA  |
| GeneCards | Neutrophil extracellular trap formation | TRIM28  |
| GeneCards | Neutrophil extracellular trap formation | GTF2B   |
| GeneCards | Neutrophil extracellular trap formation | OSTC    |
| GeneCards | Neutrophil extracellular trap formation | NASP    |
| GeneCards | Neutrophil extracellular trap formation | WNT10B  |
| GeneCards | Neutrophil extracellular trap formation | CDK17   |
| GeneCards | Neutrophil extracellular trap formation | TUBB2A  |
| GeneCards | Neutrophil extracellular trap formation | SYVN1   |
| GeneCards | Neutrophil extracellular trap formation | PAPPA   |
| GeneCards | Neutrophil extracellular trap formation | VPS37D  |
| GeneCards | Neutrophil extracellular trap formation | LSM7    |
| GeneCards | Neutrophil extracellular trap formation | MRS2    |
| GeneCards | Neutrophil extracellular trap formation | IPO9    |
| GeneCards | Neutrophil extracellular trap formation | CBR1    |
| GeneCards | Neutrophil extracellular trap formation | SENP3   |
| GeneCards | Neutrophil extracellular trap formation | RFC4    |

|           |                                         |          |
|-----------|-----------------------------------------|----------|
| GeneCards | Neutrophil extracellular trap formation | HSPA14   |
| GeneCards | Neutrophil extracellular trap formation | FIGNL1   |
| GeneCards | Neutrophil extracellular trap formation | SIK3     |
| GeneCards | Neutrophil extracellular trap formation | GLI2     |
| GeneCards | Neutrophil extracellular trap formation | RCC1     |
| GeneCards | Neutrophil extracellular trap formation | MXRA8    |
| GeneCards | Neutrophil extracellular trap formation | LYG1     |
| GeneCards | Neutrophil extracellular trap formation | LRRC8B   |
| GeneCards | Neutrophil extracellular trap formation | TXLNA    |
| GeneCards | Neutrophil extracellular trap formation | NEDD4L   |
| GeneCards | Neutrophil extracellular trap formation | F11      |
| GeneCards | Neutrophil extracellular trap formation | FHL1     |
| GeneCards | Neutrophil extracellular trap formation | TSC22D1  |
| GeneCards | Neutrophil extracellular trap formation | YPEL5    |
| GeneCards | Neutrophil extracellular trap formation | CD109    |
| GeneCards | Neutrophil extracellular trap formation | WFIKKN1  |
| GeneCards | Neutrophil extracellular trap formation | E2F1     |
| GeneCards | Neutrophil extracellular trap formation | MPHOSPH9 |
| GeneCards | Neutrophil extracellular trap formation | DYNC1LI1 |
| GeneCards | Neutrophil extracellular trap formation | SNHG5    |
| GeneCards | Neutrophil extracellular trap formation | ANAPC2   |
| GeneCards | Neutrophil extracellular trap formation | CPD      |

|           |                                         |           |
|-----------|-----------------------------------------|-----------|
| GeneCards | Neutrophil extracellular trap formation | TIMM44    |
| GeneCards | Neutrophil extracellular trap formation | FPGS      |
| GeneCards | Neutrophil extracellular trap formation | KREMEN2   |
| GeneCards | Neutrophil extracellular trap formation | MED29     |
| GeneCards | Neutrophil extracellular trap formation | SCD       |
| GeneCards | Neutrophil extracellular trap formation | N4BP2     |
| GeneCards | Neutrophil extracellular trap formation | GRAMD1A   |
| GeneCards | Neutrophil extracellular trap formation | DHCR24    |
| GeneCards | Neutrophil extracellular trap formation | TAGLN2    |
| GeneCards | Neutrophil extracellular trap formation | RAPGEF4   |
| GeneCards | Neutrophil extracellular trap formation | ATF7      |
| GeneCards | Neutrophil extracellular trap formation | CUZD1     |
| GeneCards | Neutrophil extracellular trap formation | PGRMC1    |
| GeneCards | Neutrophil extracellular trap formation | GPS2      |
| GeneCards | Neutrophil extracellular trap formation | COMMD5    |
| GeneCards | Neutrophil extracellular trap formation | PSMB1     |
| GeneCards | Neutrophil extracellular trap formation | POGZ      |
| GeneCards | Neutrophil extracellular trap formation | HSPH1     |
| GeneCards | Neutrophil extracellular trap formation | FGF9      |
| GeneCards | Neutrophil extracellular trap formation | GRHL3     |
| GeneCards | Neutrophil extracellular trap formation | ERRFI1    |
| GeneCards | Neutrophil extracellular trap formation | EIF4ENIF1 |

|           |                                         |              |
|-----------|-----------------------------------------|--------------|
| GeneCards | Neutrophil extracellular trap formation | LOC110806263 |
| GeneCards | Neutrophil extracellular trap formation | CAPZB        |
| GeneCards | Neutrophil extracellular trap formation | MINPP1       |
| GeneCards | Neutrophil extracellular trap formation | STBD1        |
| GeneCards | Neutrophil extracellular trap formation | FYCO1        |
| GeneCards | Neutrophil extracellular trap formation | DNAJA1       |
| GeneCards | Neutrophil extracellular trap formation | PKLR         |
| GeneCards | Neutrophil extracellular trap formation | TMX1         |
| GeneCards | Neutrophil extracellular trap formation | CES1         |
| GeneCards | Neutrophil extracellular trap formation | ADM5         |
| GeneCards | Neutrophil extracellular trap formation | ALDH3A2      |
| GeneCards | Neutrophil extracellular trap formation | KRT7         |
| GeneCards | Neutrophil extracellular trap formation | SAPCD1       |
| GeneCards | Neutrophil extracellular trap formation | ACSL3        |
| GeneCards | Neutrophil extracellular trap formation | EYA3         |
| GeneCards | Neutrophil extracellular trap formation | NRN1L        |
| GeneCards | Neutrophil extracellular trap formation | SF3B4        |
| GeneCards | Neutrophil extracellular trap formation | PSMB3        |
| GeneCards | Neutrophil extracellular trap formation | NMUR1        |
| GeneCards | Neutrophil extracellular trap formation | CACNG3       |
| GeneCards | Neutrophil extracellular trap formation | AUP1         |
| GeneCards | Neutrophil extracellular trap formation | RPS2         |



|           |                                         |          |
|-----------|-----------------------------------------|----------|
| GeneCards | Neutrophil extracellular trap formation | KHSRP    |
| GeneCards | Neutrophil extracellular trap formation | TSPAN18  |
| GeneCards | Neutrophil extracellular trap formation | VEGFD    |
| GeneCards | Neutrophil extracellular trap formation | ADAP1    |
| GeneCards | Neutrophil extracellular trap formation | ANKRD46  |
| GeneCards | Neutrophil extracellular trap formation | RFC1     |
| GeneCards | Neutrophil extracellular trap formation | VGLL4    |
| GeneCards | Neutrophil extracellular trap formation | AP2A2    |
| GeneCards | Neutrophil extracellular trap formation | REST     |
| GeneCards | Neutrophil extracellular trap formation | SAE1     |
| GeneCards | Neutrophil extracellular trap formation | KCTD6    |
| GeneCards | Neutrophil extracellular trap formation | RUVBL1   |
| GeneCards | Neutrophil extracellular trap formation | RHOU     |
| GeneCards | Neutrophil extracellular trap formation | USP6NL   |
| GeneCards | Neutrophil extracellular trap formation | ERGIC3   |
| GeneCards | Neutrophil extracellular trap formation | ZNF333   |
| GeneCards | Neutrophil extracellular trap formation | RNF2     |
| GeneCards | Neutrophil extracellular trap formation | PAFAH1B1 |
| GeneCards | Neutrophil extracellular trap formation | HDLBP    |
| GeneCards | Neutrophil extracellular trap formation | WARS1    |
| GeneCards | Neutrophil extracellular trap formation | NRCAM    |
| GeneCards | Neutrophil extracellular trap formation | CEPT1    |

|           |                                         |        |
|-----------|-----------------------------------------|--------|
| GeneCards | Neutrophil extracellular trap formation | SRP68  |
| GeneCards | Neutrophil extracellular trap formation | DCAF8  |
| GeneCards | Neutrophil extracellular trap formation | CLEC9A |
| GeneCards | Neutrophil extracellular trap formation | PSMC1  |
| GeneCards | Neutrophil extracellular trap formation | MIR18A |
| GeneCards | Neutrophil extracellular trap formation | MYOZ2  |
| GeneCards | Neutrophil extracellular trap formation | SH2D3C |
| GeneCards | Neutrophil extracellular trap formation | SAFB2  |
| GeneCards | Neutrophil extracellular trap formation | TERF2  |
| GeneCards | Neutrophil extracellular trap formation | ERLIN2 |
| GeneCards | Neutrophil extracellular trap formation | RAB2A  |
| GeneCards | Neutrophil extracellular trap formation | PFKP   |
| GeneCards | Neutrophil extracellular trap formation | AGR2   |
| GeneCards | Neutrophil extracellular trap formation | PRCP   |
| GeneCards | Neutrophil extracellular trap formation | VPS39  |
| GeneCards | Neutrophil extracellular trap formation | FBXO48 |
| GeneCards | Neutrophil extracellular trap formation | UBE2G2 |
| GeneCards | Neutrophil extracellular trap formation | ZNF250 |
| GeneCards | Neutrophil extracellular trap formation | SLC4A7 |
| GeneCards | Neutrophil extracellular trap formation | TAF8   |
| GeneCards | Neutrophil extracellular trap formation | H4C3   |
| GeneCards | Neutrophil extracellular trap formation | STK10  |

|           |                                         |         |
|-----------|-----------------------------------------|---------|
| GeneCards | Neutrophil extracellular trap formation | PISD    |
| GeneCards | Neutrophil extracellular trap formation | UBE2E3  |
| GeneCards | Neutrophil extracellular trap formation | PIGU    |
| GeneCards | Neutrophil extracellular trap formation | RAMP3   |
| GeneCards | Neutrophil extracellular trap formation | TEX264  |
| GeneCards | Neutrophil extracellular trap formation | PTP4A1  |
| GeneCards | Neutrophil extracellular trap formation | GADD45A |
| GeneCards | Neutrophil extracellular trap formation | PDGFRL  |
| GeneCards | Neutrophil extracellular trap formation | FBRS    |
| GeneCards | Neutrophil extracellular trap formation | SRSF9   |
| GeneCards | Neutrophil extracellular trap formation | TAF4    |
| GeneCards | Neutrophil extracellular trap formation | MBNL1   |
| GeneCards | Neutrophil extracellular trap formation | SS18    |
| GeneCards | Neutrophil extracellular trap formation | TNFSF18 |
| GeneCards | Neutrophil extracellular trap formation | GLB1L   |
| GeneCards | Neutrophil extracellular trap formation | EVA1C   |
| GeneCards | Neutrophil extracellular trap formation | DCAF5   |
| GeneCards | Neutrophil extracellular trap formation | SLC43A2 |
| GeneCards | Neutrophil extracellular trap formation | TOR1A   |
| GeneCards | Neutrophil extracellular trap formation | GLMN    |
| GeneCards | Neutrophil extracellular trap formation | ABCG1   |
| GeneCards | Neutrophil extracellular trap formation | ZNF350  |

|           |                                         |          |
|-----------|-----------------------------------------|----------|
| GeneCards | Neutrophil extracellular trap formation | PRMT5    |
| GeneCards | Neutrophil extracellular trap formation | TBL2     |
| GeneCards | Neutrophil extracellular trap formation | PRRC2A   |
| GeneCards | Neutrophil extracellular trap formation | CCNDBP1  |
| GeneCards | Neutrophil extracellular trap formation | TULP3    |
| GeneCards | Neutrophil extracellular trap formation | GYPE     |
| GeneCards | Neutrophil extracellular trap formation | CDK5RAP2 |
| GeneCards | Neutrophil extracellular trap formation | RSPRY1   |
| GeneCards | Neutrophil extracellular trap formation | H2AZ1    |
| GeneCards | Neutrophil extracellular trap formation | TBC1D15  |
| GeneCards | Neutrophil extracellular trap formation | ITPK1    |
| GeneCards | Neutrophil extracellular trap formation | RBP4     |
| GeneCards | Neutrophil extracellular trap formation | OLIG2    |
| GeneCards | Neutrophil extracellular trap formation | RAB3GAP1 |
| GeneCards | Neutrophil extracellular trap formation | MIR483   |
| GeneCards | Neutrophil extracellular trap formation | UGGT1    |
| GeneCards | Neutrophil extracellular trap formation | CLK4     |
| GeneCards | Neutrophil extracellular trap formation | GGA1     |
| GeneCards | Neutrophil extracellular trap formation | RPAP1    |
| GeneCards | Neutrophil extracellular trap formation | DNAAF2   |
| GeneCards | Neutrophil extracellular trap formation | MIR132   |
| GeneCards | Neutrophil extracellular trap formation | IFNA6    |

|           |                                         |         |
|-----------|-----------------------------------------|---------|
| GeneCards | Neutrophil extracellular trap formation | PIDD1   |
| GeneCards | Neutrophil extracellular trap formation | SCPEP1  |
| GeneCards | Neutrophil extracellular trap formation | SLC35E1 |
| GeneCards | Neutrophil extracellular trap formation | TMEM43  |
| GeneCards | Neutrophil extracellular trap formation | CDH17   |
| GeneCards | Neutrophil extracellular trap formation | COPRS   |
| GeneCards | Neutrophil extracellular trap formation | RPS13   |
| GeneCards | Neutrophil extracellular trap formation | ACP6    |
| GeneCards | Neutrophil extracellular trap formation | SH2D4A  |
| GeneCards | Neutrophil extracellular trap formation | FARP2   |
| GeneCards | Neutrophil extracellular trap formation | SIPA1L3 |
| GeneCards | Neutrophil extracellular trap formation | DNAJC5  |
| GeneCards | Neutrophil extracellular trap formation | RACGAP1 |
| GeneCards | Neutrophil extracellular trap formation | CTSE    |
| GeneCards | Neutrophil extracellular trap formation | NES     |
| GeneCards | Neutrophil extracellular trap formation | ST8SIA2 |
| GeneCards | Neutrophil extracellular trap formation | AEBP2   |
| GeneCards | Neutrophil extracellular trap formation | SLC9A3  |
| GeneCards | Neutrophil extracellular trap formation | TMEM109 |
| GeneCards | Neutrophil extracellular trap formation | RASSF2  |
| GeneCards | Neutrophil extracellular trap formation | RO60    |
| GeneCards | Neutrophil extracellular trap formation | GAPVD1  |

|           |                                         |          |
|-----------|-----------------------------------------|----------|
| GeneCards | Neutrophil extracellular trap formation | SARS1    |
| GeneCards | Neutrophil extracellular trap formation | MARS1    |
| GeneCards | Neutrophil extracellular trap formation | MTA1     |
| GeneCards | Neutrophil extracellular trap formation | FBF1     |
| GeneCards | Neutrophil extracellular trap formation | CFAP410  |
| GeneCards | Neutrophil extracellular trap formation | RUVBL2   |
| GeneCards | Neutrophil extracellular trap formation | CRABP2   |
| GeneCards | Neutrophil extracellular trap formation | HECTD1   |
| GeneCards | Neutrophil extracellular trap formation | ITPKB    |
| GeneCards | Neutrophil extracellular trap formation | CUL5     |
| GeneCards | Neutrophil extracellular trap formation | EML5     |
| GeneCards | Neutrophil extracellular trap formation | CD5L     |
| GeneCards | Neutrophil extracellular trap formation | MYO9B    |
| GeneCards | Neutrophil extracellular trap formation | TMEM161A |
| GeneCards | Neutrophil extracellular trap formation | STARD3   |
| GeneCards | Neutrophil extracellular trap formation | PELO     |
| GeneCards | Neutrophil extracellular trap formation | PAX5     |
| GeneCards | Neutrophil extracellular trap formation | MIR16-1  |
| GeneCards | Neutrophil extracellular trap formation | PMP22    |
| GeneCards | Neutrophil extracellular trap formation | CACYBP   |
| GeneCards | Neutrophil extracellular trap formation | MEN1     |
| GeneCards | Neutrophil extracellular trap formation | MDN1     |

|           |                                         |          |
|-----------|-----------------------------------------|----------|
| GeneCards | Neutrophil extracellular trap formation | KAT2B    |
| GeneCards | Neutrophil extracellular trap formation | MEGF9    |
| GeneCards | Neutrophil extracellular trap formation | C11orf58 |
| GeneCards | Neutrophil extracellular trap formation | SERTAD1  |
| GeneCards | Neutrophil extracellular trap formation | MRPS6    |
| GeneCards | Neutrophil extracellular trap formation | MYOD1    |
| GeneCards | Neutrophil extracellular trap formation | RPL12    |
| GeneCards | Neutrophil extracellular trap formation | PPP2R1A  |
| GeneCards | Neutrophil extracellular trap formation | CAPN10   |
| GeneCards | Neutrophil extracellular trap formation | CRYAA    |
| GeneCards | Neutrophil extracellular trap formation | PKNOX1   |
| GeneCards | Neutrophil extracellular trap formation | SMG9     |
| GeneCards | Neutrophil extracellular trap formation | UBAP2L   |
| GeneCards | Neutrophil extracellular trap formation | GTF2H4   |
| GeneCards | Neutrophil extracellular trap formation | CD2BP2   |
| GeneCards | Neutrophil extracellular trap formation | TEP1     |
| GeneCards | Neutrophil extracellular trap formation | PRKAR2A  |
| GeneCards | Neutrophil extracellular trap formation | TSHB     |
| GeneCards | Neutrophil extracellular trap formation | RADIL    |
| GeneCards | Neutrophil extracellular trap formation | EPB42    |
| GeneCards | Neutrophil extracellular trap formation | CDC25B   |
| GeneCards | Neutrophil extracellular trap formation | INTS7    |

|           |                                         |            |
|-----------|-----------------------------------------|------------|
| GeneCards | Neutrophil extracellular trap formation | MCM2       |
| GeneCards | Neutrophil extracellular trap formation | PPM1H      |
| GeneCards | Neutrophil extracellular trap formation | FUS        |
| GeneCards | Neutrophil extracellular trap formation | POLR2B     |
| GeneCards | Neutrophil extracellular trap formation | ARID1B     |
| GeneCards | Neutrophil extracellular trap formation | ST6GALNAC6 |
| GeneCards | Neutrophil extracellular trap formation | RANBP1     |
| GeneCards | Neutrophil extracellular trap formation | MAGI1      |
| GeneCards | Neutrophil extracellular trap formation | MSLN       |
| GeneCards | Neutrophil extracellular trap formation | AURKA      |
| GeneCards | Neutrophil extracellular trap formation | KIF2C      |
| GeneCards | Neutrophil extracellular trap formation | CACNG2     |
| GeneCards | Neutrophil extracellular trap formation | ANKRD49    |
| GeneCards | Neutrophil extracellular trap formation | PMEL       |
| GeneCards | Neutrophil extracellular trap formation | PIAS1      |
| GeneCards | Neutrophil extracellular trap formation | WEE1       |
| GeneCards | Neutrophil extracellular trap formation | MIR200A    |
| GeneCards | Neutrophil extracellular trap formation | CDK7       |
| GeneCards | Neutrophil extracellular trap formation | PRICKLE1   |
| GeneCards | Neutrophil extracellular trap formation | DNAJC19    |
| GeneCards | Neutrophil extracellular trap formation | BACH1      |
| GeneCards | Neutrophil extracellular trap formation | FABP2      |



|           |                                         |         |
|-----------|-----------------------------------------|---------|
| GeneCards | Neutrophil extracellular trap formation | NDUFS6  |
| GeneCards | Neutrophil extracellular trap formation | OSBPL8  |
| GeneCards | Neutrophil extracellular trap formation | CDC34   |
| GeneCards | Neutrophil extracellular trap formation | CCNE1   |
| GeneCards | Neutrophil extracellular trap formation | CACFD1  |
| GeneCards | Neutrophil extracellular trap formation | RNMT    |
| GeneCards | Neutrophil extracellular trap formation | RNF7    |
| GeneCards | Neutrophil extracellular trap formation | FIBIN   |
| GeneCards | Neutrophil extracellular trap formation | WFDC1   |
| GeneCards | Neutrophil extracellular trap formation | CDC6    |
| GeneCards | Neutrophil extracellular trap formation | LRP10   |
| GeneCards | Neutrophil extracellular trap formation | BIN2    |
| GeneCards | Neutrophil extracellular trap formation | DDX39A  |
| GeneCards | Neutrophil extracellular trap formation | SKP1    |
| GeneCards | Neutrophil extracellular trap formation | CNN3    |
| GeneCards | Neutrophil extracellular trap formation | ATG16L1 |
| GeneCards | Neutrophil extracellular trap formation | IMPDH1  |
| GeneCards | Neutrophil extracellular trap formation | U2AF2   |
| GeneCards | Neutrophil extracellular trap formation | MIR200C |
| GeneCards | Neutrophil extracellular trap formation | RTP5    |
| GeneCards | Neutrophil extracellular trap formation | SLC2A5  |
| GeneCards | Neutrophil extracellular trap formation | EPB41L5 |

|           |                                         |          |
|-----------|-----------------------------------------|----------|
| GeneCards | Neutrophil extracellular trap formation | PBXIP1   |
| GeneCards | Neutrophil extracellular trap formation | GSTM3    |
| GeneCards | Neutrophil extracellular trap formation | DCTN2    |
| GeneCards | Neutrophil extracellular trap formation | NUMB     |
| GeneCards | Neutrophil extracellular trap formation | UMAD1    |
| GeneCards | Neutrophil extracellular trap formation | SLC25A1  |
| GeneCards | Neutrophil extracellular trap formation | RAB1A    |
| GeneCards | Neutrophil extracellular trap formation | MTSS1    |
| GeneCards | Neutrophil extracellular trap formation | GYPB     |
| GeneCards | Neutrophil extracellular trap formation | OCIAD1   |
| GeneCards | Neutrophil extracellular trap formation | MGA      |
| GeneCards | Neutrophil extracellular trap formation | TOR1B    |
| GeneCards | Neutrophil extracellular trap formation | PABPC4   |
| GeneCards | Neutrophil extracellular trap formation | AKAP11   |
| GeneCards | Neutrophil extracellular trap formation | ARFGAP2  |
| GeneCards | Neutrophil extracellular trap formation | SIVA1    |
| GeneCards | Neutrophil extracellular trap formation | AHSA2P   |
| GeneCards | Neutrophil extracellular trap formation | CD276    |
| GeneCards | Neutrophil extracellular trap formation | MAEA     |
| GeneCards | Neutrophil extracellular trap formation | TNFRSF25 |
| GeneCards | Neutrophil extracellular trap formation | SLK      |
| GeneCards | Neutrophil extracellular trap formation | SCCPDH   |

|           |                                         |          |
|-----------|-----------------------------------------|----------|
| GeneCards | Neutrophil extracellular trap formation | TMEM106B |
| GeneCards | Neutrophil extracellular trap formation | PXYLP1   |
| GeneCards | Neutrophil extracellular trap formation | KTN1     |
| GeneCards | Neutrophil extracellular trap formation | SNTB2    |
| GeneCards | Neutrophil extracellular trap formation | ANGPTL8  |
| GeneCards | Neutrophil extracellular trap formation | KPNA2    |
| GeneCards | Neutrophil extracellular trap formation | PILRA    |
| GeneCards | Neutrophil extracellular trap formation | GJD4     |
| GeneCards | Neutrophil extracellular trap formation | CDON     |
| GeneCards | Neutrophil extracellular trap formation | ZFYVE16  |
| GeneCards | Neutrophil extracellular trap formation | TLR10    |
| GeneCards | Neutrophil extracellular trap formation | RPL23    |
| GeneCards | Neutrophil extracellular trap formation | VAR51    |
| GeneCards | Neutrophil extracellular trap formation | HNRNPA3  |
| GeneCards | Neutrophil extracellular trap formation | ARID4B   |
| GeneCards | Neutrophil extracellular trap formation | NPC2     |
| GeneCards | Neutrophil extracellular trap formation | GABPA    |
| GeneCards | Neutrophil extracellular trap formation | ITSN1    |
| GeneCards | Neutrophil extracellular trap formation | POLR3B   |
| GeneCards | Neutrophil extracellular trap formation | GTF3C5   |
| GeneCards | Neutrophil extracellular trap formation | UBE2O    |
| GeneCards | Neutrophil extracellular trap formation | ANKRD52  |

|           |                                         |         |
|-----------|-----------------------------------------|---------|
| GeneCards | Neutrophil extracellular trap formation | LMX1B   |
| GeneCards | Neutrophil extracellular trap formation | ZNF766  |
| GeneCards | Neutrophil extracellular trap formation | GIT1    |
| GeneCards | Neutrophil extracellular trap formation | UBE2G1  |
| GeneCards | Neutrophil extracellular trap formation | WBP2    |
| GeneCards | Neutrophil extracellular trap formation | KCMF1   |
| GeneCards | Neutrophil extracellular trap formation | EIF4G1  |
| GeneCards | Neutrophil extracellular trap formation | TJAP1   |
| GeneCards | Neutrophil extracellular trap formation | LRCH4   |
| GeneCards | Neutrophil extracellular trap formation | GART    |
| GeneCards | Neutrophil extracellular trap formation | KRTDAP  |
| GeneCards | Neutrophil extracellular trap formation | RNASE11 |
| GeneCards | Neutrophil extracellular trap formation | FBXO11  |
| GeneCards | Neutrophil extracellular trap formation | RNF5    |
| GeneCards | Neutrophil extracellular trap formation | BDH2    |
| GeneCards | Neutrophil extracellular trap formation | CAPZA2  |
| GeneCards | Neutrophil extracellular trap formation | CRY1    |
| GeneCards | Neutrophil extracellular trap formation | CCDC47  |
| GeneCards | Neutrophil extracellular trap formation | TPD52   |
| GeneCards | Neutrophil extracellular trap formation | WRNIP1  |
| GeneCards | Neutrophil extracellular trap formation | TERF1   |
| GeneCards | Neutrophil extracellular trap formation | MSH2    |

|           |                                         |          |
|-----------|-----------------------------------------|----------|
| GeneCards | Neutrophil extracellular trap formation | KLK8     |
| GeneCards | Neutrophil extracellular trap formation | FAM151B  |
| GeneCards | Neutrophil extracellular trap formation | RNF126   |
| GeneCards | Neutrophil extracellular trap formation | TMEM184B |
| GeneCards | Neutrophil extracellular trap formation | TBCD     |
| GeneCards | Neutrophil extracellular trap formation | TRIP4    |
| GeneCards | Neutrophil extracellular trap formation | MIR151A  |
| GeneCards | Neutrophil extracellular trap formation | ADPGK    |
| GeneCards | Neutrophil extracellular trap formation | ARMC10   |
| GeneCards | Neutrophil extracellular trap formation | MIR124-1 |
| GeneCards | Neutrophil extracellular trap formation | NOSIP    |
| GeneCards | Neutrophil extracellular trap formation | XYLB     |
| GeneCards | Neutrophil extracellular trap formation | SNTB1    |
| GeneCards | Neutrophil extracellular trap formation | RAB34    |
| GeneCards | Neutrophil extracellular trap formation | NUP62    |
| GeneCards | Neutrophil extracellular trap formation | STX5     |
| GeneCards | Neutrophil extracellular trap formation | ABCG4    |
| GeneCards | Neutrophil extracellular trap formation | TRIM9    |
| GeneCards | Neutrophil extracellular trap formation | KHK      |
| GeneCards | Neutrophil extracellular trap formation | YIF1A    |
| GeneCards | Neutrophil extracellular trap formation | PLXNA4   |
| GeneCards | Neutrophil extracellular trap formation | SULT1A3  |

|           |                                         |           |
|-----------|-----------------------------------------|-----------|
| GeneCards | Neutrophil extracellular trap formation | GPR19     |
| GeneCards | Neutrophil extracellular trap formation | RDH13     |
| GeneCards | Neutrophil extracellular trap formation | SERPINA10 |
| GeneCards | Neutrophil extracellular trap formation | FAM120B   |
| GeneCards | Neutrophil extracellular trap formation | MCM3      |
| GeneCards | Neutrophil extracellular trap formation | TUBA4A    |
| GeneCards | Neutrophil extracellular trap formation | RAB18     |
| GeneCards | Neutrophil extracellular trap formation | TRIO      |
| GeneCards | Neutrophil extracellular trap formation | ASB8      |
| GeneCards | Neutrophil extracellular trap formation | BUB1B     |
| GeneCards | Neutrophil extracellular trap formation | ATP6V0E1  |
| GeneCards | Neutrophil extracellular trap formation | OVOS2     |
| GeneCards | Neutrophil extracellular trap formation | EPB41     |
| GeneCards | Neutrophil extracellular trap formation | AMIGO2    |
| GeneCards | Neutrophil extracellular trap formation | UGT3A2    |
| GeneCards | Neutrophil extracellular trap formation | WRN       |
| GeneCards | Neutrophil extracellular trap formation | SLA       |
| GeneCards | Neutrophil extracellular trap formation | BIRC6     |
| GeneCards | Neutrophil extracellular trap formation | TRIM39    |
| GeneCards | Neutrophil extracellular trap formation | RAP1GAP   |
| GeneCards | Neutrophil extracellular trap formation | NUP133    |
| GeneCards | Neutrophil extracellular trap formation | TUBA1A    |

|           |                                         |         |
|-----------|-----------------------------------------|---------|
| GeneCards | Neutrophil extracellular trap formation | TUBB1   |
| GeneCards | Neutrophil extracellular trap formation | MYF5    |
| GeneCards | Neutrophil extracellular trap formation | PRDX3   |
| GeneCards | Neutrophil extracellular trap formation | SFTA2   |
| GeneCards | Neutrophil extracellular trap formation | MLF2    |
| GeneCards | Neutrophil extracellular trap formation | PARP4   |
| GeneCards | Neutrophil extracellular trap formation | CAMK2D  |
| GeneCards | Neutrophil extracellular trap formation | TTC8    |
| GeneCards | Neutrophil extracellular trap formation | SPACA3  |
| GeneCards | Neutrophil extracellular trap formation | TUBA1C  |
| GeneCards | Neutrophil extracellular trap formation | KAT7    |
| GeneCards | Neutrophil extracellular trap formation | ANG     |
| GeneCards | Neutrophil extracellular trap formation | MS4A4A  |
| GeneCards | Neutrophil extracellular trap formation | GALNT2  |
| GeneCards | Neutrophil extracellular trap formation | RPLP2   |
| GeneCards | Neutrophil extracellular trap formation | VWC2    |
| GeneCards | Neutrophil extracellular trap formation | H4C8    |
| GeneCards | Neutrophil extracellular trap formation | ENDOD1  |
| GeneCards | Neutrophil extracellular trap formation | UBE2D1  |
| GeneCards | Neutrophil extracellular trap formation | MCF2    |
| GeneCards | Neutrophil extracellular trap formation | ASPH    |
| GeneCards | Neutrophil extracellular trap formation | FAM168B |

|           |                                         |          |
|-----------|-----------------------------------------|----------|
| GeneCards | Neutrophil extracellular trap formation | SPTB     |
| GeneCards | Neutrophil extracellular trap formation | TMC5     |
| GeneCards | Neutrophil extracellular trap formation | LRCH1    |
| GeneCards | Neutrophil extracellular trap formation | GPD2     |
| GeneCards | Neutrophil extracellular trap formation | LRFN3    |
| GeneCards | Neutrophil extracellular trap formation | SEC61B   |
| GeneCards | Neutrophil extracellular trap formation | GPR89A   |
| GeneCards | Neutrophil extracellular trap formation | TP53I13  |
| GeneCards | Neutrophil extracellular trap formation | PYM1     |
| GeneCards | Neutrophil extracellular trap formation | CDK5RAP1 |
| GeneCards | Neutrophil extracellular trap formation | BAIAP2L1 |
| GeneCards | Neutrophil extracellular trap formation | ALDH1B1  |
| GeneCards | Neutrophil extracellular trap formation | CXCR5    |
| GeneCards | Neutrophil extracellular trap formation | MFSD9    |
| GeneCards | Neutrophil extracellular trap formation | SLC2A6   |
| GeneCards | Neutrophil extracellular trap formation | DUSP11   |
| GeneCards | Neutrophil extracellular trap formation | IFNA4    |
| GeneCards | Neutrophil extracellular trap formation | SLC25A3  |
| GeneCards | Neutrophil extracellular trap formation | ASIP     |
| GeneCards | Neutrophil extracellular trap formation | LALBA    |
| GeneCards | Neutrophil extracellular trap formation | POLI     |
| GeneCards | Neutrophil extracellular trap formation | GOLGA7   |



|           |                                         |          |
|-----------|-----------------------------------------|----------|
| GeneCards | Neutrophil extracellular trap formation | UBQLN1   |
| GeneCards | Neutrophil extracellular trap formation | GTF2F1   |
| GeneCards | Neutrophil extracellular trap formation | NIPBL    |
| GeneCards | Neutrophil extracellular trap formation | SAAL1    |
| GeneCards | Neutrophil extracellular trap formation | UFD1     |
| GeneCards | Neutrophil extracellular trap formation | CD320    |
| GeneCards | Neutrophil extracellular trap formation | TMEM98   |
| GeneCards | Neutrophil extracellular trap formation | CRISPLD1 |
| GeneCards | Neutrophil extracellular trap formation | OSCP1    |
| GeneCards | Neutrophil extracellular trap formation | INVS     |
| GeneCards | Neutrophil extracellular trap formation | EIF2B1   |
| GeneCards | Neutrophil extracellular trap formation | HBA2     |
| GeneCards | Neutrophil extracellular trap formation | CHMP4B   |
| GeneCards | Neutrophil extracellular trap formation | UXS1     |
| GeneCards | Neutrophil extracellular trap formation | CACNA1B  |
| GeneCards | Neutrophil extracellular trap formation | SLC25A5  |
| GeneCards | Neutrophil extracellular trap formation | ZDHHC12  |
| GeneCards | Neutrophil extracellular trap formation | CCT7     |
| GeneCards | Neutrophil extracellular trap formation | CXCL17   |
| GeneCards | Neutrophil extracellular trap formation | IQGAP3   |
| GeneCards | Neutrophil extracellular trap formation | PROK1    |
| GeneCards | Neutrophil extracellular trap formation | DOCK1    |

|           |                                         |          |
|-----------|-----------------------------------------|----------|
| GeneCards | Neutrophil extracellular trap formation | CKM      |
| GeneCards | Neutrophil extracellular trap formation | LINC-ROR |
| GeneCards | Neutrophil extracellular trap formation | PELP1    |
| GeneCards | Neutrophil extracellular trap formation | PBRM1    |
| GeneCards | Neutrophil extracellular trap formation | PEX13    |
| GeneCards | Neutrophil extracellular trap formation | ANO10    |
| GeneCards | Neutrophil extracellular trap formation | ARRDC3   |
| GeneCards | Neutrophil extracellular trap formation | CTBP2    |
| GeneCards | Neutrophil extracellular trap formation | PRSS23   |
| GeneCards | Neutrophil extracellular trap formation | ZFR      |
| GeneCards | Neutrophil extracellular trap formation | SP110    |
| GeneCards | Neutrophil extracellular trap formation | ERCC6    |
| GeneCards | Neutrophil extracellular trap formation | MGRN1    |
| GeneCards | Neutrophil extracellular trap formation | LRRFIP2  |
| GeneCards | Neutrophil extracellular trap formation | ABCC11   |
| GeneCards | Neutrophil extracellular trap formation | SLC35F6  |
| GeneCards | Neutrophil extracellular trap formation | TNFRSF14 |
| GeneCards | Neutrophil extracellular trap formation | MANF     |
| GeneCards | Neutrophil extracellular trap formation | SF1      |
| GeneCards | Neutrophil extracellular trap formation | BCLAF1   |
| GeneCards | Neutrophil extracellular trap formation | INF2     |
| GeneCards | Neutrophil extracellular trap formation | ENTR1    |

|           |                                         |            |
|-----------|-----------------------------------------|------------|
| GeneCards | Neutrophil extracellular trap formation | WFIKKN2    |
| GeneCards | Neutrophil extracellular trap formation | RIF1       |
| GeneCards | Neutrophil extracellular trap formation | MUTYH      |
| GeneCards | Neutrophil extracellular trap formation | ESS2       |
| GeneCards | Neutrophil extracellular trap formation | SEC24B     |
| GeneCards | Neutrophil extracellular trap formation | ZNF687     |
| GeneCards | Neutrophil extracellular trap formation | H4C5       |
| GeneCards | Neutrophil extracellular trap formation | CEACAM19   |
| GeneCards | Neutrophil extracellular trap formation | PSMC5      |
| GeneCards | Neutrophil extracellular trap formation | GIGYF1     |
| GeneCards | Neutrophil extracellular trap formation | GSG1L      |
| GeneCards | Neutrophil extracellular trap formation | ANGPTL5    |
| GeneCards | Neutrophil extracellular trap formation | SNRPD2     |
| GeneCards | Neutrophil extracellular trap formation | OTUB1      |
| GeneCards | Neutrophil extracellular trap formation | PINX1      |
| GeneCards | Neutrophil extracellular trap formation | GADD45GIP1 |
| GeneCards | Neutrophil extracellular trap formation | UBE4B      |
| GeneCards | Neutrophil extracellular trap formation | SEMG1      |
| GeneCards | Neutrophil extracellular trap formation | ATXN7      |
| GeneCards | Neutrophil extracellular trap formation | PC         |
| GeneCards | Neutrophil extracellular trap formation | PLEKHM3    |
| GeneCards | Neutrophil extracellular trap formation | TBL1X      |

|           |                                         |          |
|-----------|-----------------------------------------|----------|
| GeneCards | Neutrophil extracellular trap formation | LSM3     |
| GeneCards | Neutrophil extracellular trap formation | AXIN2    |
| GeneCards | Neutrophil extracellular trap formation | C18orf25 |
| GeneCards | Neutrophil extracellular trap formation | NXPE3    |
| GeneCards | Neutrophil extracellular trap formation | BRAP     |
| GeneCards | Neutrophil extracellular trap formation | DLX3     |
| GeneCards | Neutrophil extracellular trap formation | ECT2     |
| GeneCards | Neutrophil extracellular trap formation | PHLDB3   |
| GeneCards | Neutrophil extracellular trap formation | FLCN     |
| GeneCards | Neutrophil extracellular trap formation | MTA2     |
| GeneCards | Neutrophil extracellular trap formation | TUSC3    |
| GeneCards | Neutrophil extracellular trap formation | CD300LD  |
| GeneCards | Neutrophil extracellular trap formation | PAICS    |
| GeneCards | Neutrophil extracellular trap formation | PWP2     |
| GeneCards | Neutrophil extracellular trap formation | EHF      |
| GeneCards | Neutrophil extracellular trap formation | LY6G6C   |
| GeneCards | Neutrophil extracellular trap formation | DAAM1    |
| GeneCards | Neutrophil extracellular trap formation | TUBGCP6  |
| GeneCards | Neutrophil extracellular trap formation | PTPRO    |
| GeneCards | Neutrophil extracellular trap formation | NEMP1    |
| GeneCards | Neutrophil extracellular trap formation | TPM4     |
| GeneCards | Neutrophil extracellular trap formation | ATXN2L   |

|           |                                         |           |
|-----------|-----------------------------------------|-----------|
| GeneCards | Neutrophil extracellular trap formation | KALRN     |
| GeneCards | Neutrophil extracellular trap formation | PEX11B    |
| GeneCards | Neutrophil extracellular trap formation | ABCD3     |
| GeneCards | Neutrophil extracellular trap formation | SECISBP2  |
| GeneCards | Neutrophil extracellular trap formation | GRIK4     |
| GeneCards | Neutrophil extracellular trap formation | B4GALT7   |
| GeneCards | Neutrophil extracellular trap formation | APH1B     |
| GeneCards | Neutrophil extracellular trap formation | SHOC2     |
| GeneCards | Neutrophil extracellular trap formation | PEBP4     |
| GeneCards | Neutrophil extracellular trap formation | DHX40     |
| GeneCards | Neutrophil extracellular trap formation | MIS18A    |
| GeneCards | Neutrophil extracellular trap formation | PARP8     |
| GeneCards | Neutrophil extracellular trap formation | RANBP9    |
| GeneCards | Neutrophil extracellular trap formation | GAA       |
| GeneCards | Neutrophil extracellular trap formation | TMEM59    |
| GeneCards | Neutrophil extracellular trap formation | RBM38     |
| GeneCards | Neutrophil extracellular trap formation | SLC25A37  |
| GeneCards | Neutrophil extracellular trap formation | SYS1      |
| GeneCards | Neutrophil extracellular trap formation | VMO1      |
| GeneCards | Neutrophil extracellular trap formation | MIRLET7A1 |
| GeneCards | Neutrophil extracellular trap formation | DGKE      |
| GeneCards | Neutrophil extracellular trap formation | PDLIM7    |

|           |                                         |         |
|-----------|-----------------------------------------|---------|
| GeneCards | Neutrophil extracellular trap formation | TCF4    |
| GeneCards | Neutrophil extracellular trap formation | TACC1   |
| GeneCards | Neutrophil extracellular trap formation | ZNF317  |
| GeneCards | Neutrophil extracellular trap formation | DPM3    |
| GeneCards | Neutrophil extracellular trap formation | MYL12A  |
| GeneCards | Neutrophil extracellular trap formation | FCGRT   |
| GeneCards | Neutrophil extracellular trap formation | TPD52L2 |
| GeneCards | Neutrophil extracellular trap formation | NTNG2   |
| GeneCards | Neutrophil extracellular trap formation | ARCN1   |
| GeneCards | Neutrophil extracellular trap formation | ANKHD1  |
| GeneCards | Neutrophil extracellular trap formation | PSME2   |
| GeneCards | Neutrophil extracellular trap formation | GPR34   |
| GeneCards | Neutrophil extracellular trap formation | TRRAP   |
| GeneCards | Neutrophil extracellular trap formation | PIEZO2  |
| GeneCards | Neutrophil extracellular trap formation | ZNF221  |
| GeneCards | Neutrophil extracellular trap formation | WASHC5  |
| GeneCards | Neutrophil extracellular trap formation | CLEC3A  |
| GeneCards | Neutrophil extracellular trap formation | SURF1   |
| GeneCards | Neutrophil extracellular trap formation | HNRNPD  |
| GeneCards | Neutrophil extracellular trap formation | TBC1D4  |
| GeneCards | Neutrophil extracellular trap formation | RNF185  |
| GeneCards | Neutrophil extracellular trap formation | LAT     |

|           |                                         |           |
|-----------|-----------------------------------------|-----------|
| GeneCards | Neutrophil extracellular trap formation | PRADC1    |
| GeneCards | Neutrophil extracellular trap formation | RPAP2     |
| GeneCards | Neutrophil extracellular trap formation | KCNH4     |
| GeneCards | Neutrophil extracellular trap formation | SCN8A     |
| GeneCards | Neutrophil extracellular trap formation | LCN15     |
| GeneCards | Neutrophil extracellular trap formation | GPR89B    |
| GeneCards | Neutrophil extracellular trap formation | CCDC142   |
| GeneCards | Neutrophil extracellular trap formation | PSMC2     |
| GeneCards | Neutrophil extracellular trap formation | TSACC     |
| GeneCards | Neutrophil extracellular trap formation | MIR485    |
| GeneCards | Neutrophil extracellular trap formation | MARCKSL1  |
| GeneCards | Neutrophil extracellular trap formation | RNF114    |
| GeneCards | Neutrophil extracellular trap formation | CIAO1     |
| GeneCards | Neutrophil extracellular trap formation | KCNMB1    |
| GeneCards | Neutrophil extracellular trap formation | FBXW7-AS1 |
| GeneCards | Neutrophil extracellular trap formation | RAB8B     |
| GeneCards | Neutrophil extracellular trap formation | HOOK1     |
| GeneCards | Neutrophil extracellular trap formation | METTL9    |
| GeneCards | Neutrophil extracellular trap formation | NUFIP2    |
| GeneCards | Neutrophil extracellular trap formation | ATP13A3   |
| GeneCards | Neutrophil extracellular trap formation | PPP2R2A   |
| GeneCards | Neutrophil extracellular trap formation | IL21R     |

|           |                                         |         |
|-----------|-----------------------------------------|---------|
| GeneCards | Neutrophil extracellular trap formation | RBFOX2  |
| GeneCards | Neutrophil extracellular trap formation | GALNT14 |
| GeneCards | Neutrophil extracellular trap formation | AMFR    |
| GeneCards | Neutrophil extracellular trap formation | PRRG3   |
| GeneCards | Neutrophil extracellular trap formation | EXOC8   |
| GeneCards | Neutrophil extracellular trap formation | SMG1    |
| GeneCards | Neutrophil extracellular trap formation | EMC10   |
| GeneCards | Neutrophil extracellular trap formation | PPP1R7  |
| GeneCards | Neutrophil extracellular trap formation | FAM151A |
| GeneCards | Neutrophil extracellular trap formation | PREB    |
| GeneCards | Neutrophil extracellular trap formation | GRIN3B  |
| GeneCards | Neutrophil extracellular trap formation | UNC5A   |
| GeneCards | Neutrophil extracellular trap formation | CEP55   |
| GeneCards | Neutrophil extracellular trap formation | TNKS2   |
| GeneCards | Neutrophil extracellular trap formation | GNL3    |
| GeneCards | Neutrophil extracellular trap formation | CHTF18  |
| GeneCards | Neutrophil extracellular trap formation | PGLYRP2 |
| GeneCards | Neutrophil extracellular trap formation | NDUFA9  |
| GeneCards | Neutrophil extracellular trap formation | TET1    |
| GeneCards | Neutrophil extracellular trap formation | SPPL3   |
| GeneCards | Neutrophil extracellular trap formation | RNF26   |
| GeneCards | Neutrophil extracellular trap formation | IGF2BP2 |



|           |                                         |         |
|-----------|-----------------------------------------|---------|
| GeneCards | Neutrophil extracellular trap formation | ZC3H18  |
| GeneCards | Neutrophil extracellular trap formation | SDHD    |
| GeneCards | Neutrophil extracellular trap formation | SIRT5   |
| GeneCards | Neutrophil extracellular trap formation | SCN9A   |
| GeneCards | Neutrophil extracellular trap formation | GBP1    |
| GeneCards | Neutrophil extracellular trap formation | GNE     |
| GeneCards | Neutrophil extracellular trap formation | ZBTB33  |
| GeneCards | Neutrophil extracellular trap formation | CST1    |
| GeneCards | Neutrophil extracellular trap formation | CCNB1   |
| GeneCards | Neutrophil extracellular trap formation | UBE2K   |
| GeneCards | Neutrophil extracellular trap formation | CLPSL2  |
| GeneCards | Neutrophil extracellular trap formation | CLEC19A |
| GeneCards | Neutrophil extracellular trap formation | GORASP1 |
| GeneCards | Neutrophil extracellular trap formation | TMBIM4  |
| GeneCards | Neutrophil extracellular trap formation | CBX5    |
| GeneCards | Neutrophil extracellular trap formation | COPG1   |
| GeneCards | Neutrophil extracellular trap formation | NAA15   |
| GeneCards | Neutrophil extracellular trap formation | INPPL1  |
| GeneCards | Neutrophil extracellular trap formation | CEP85   |
| GeneCards | Neutrophil extracellular trap formation | PSMA2   |
| GeneCards | Neutrophil extracellular trap formation | PARL    |
| GeneCards | Neutrophil extracellular trap formation | MYCBP   |

|           |                                         |         |
|-----------|-----------------------------------------|---------|
| GeneCards | Neutrophil extracellular trap formation | CRLF3   |
| GeneCards | Neutrophil extracellular trap formation | ITLN2   |
| GeneCards | Neutrophil extracellular trap formation | CHST5   |
| GeneCards | Neutrophil extracellular trap formation | QARS1   |
| GeneCards | Neutrophil extracellular trap formation | TP73    |
| GeneCards | Neutrophil extracellular trap formation | WDR83   |
| GeneCards | Neutrophil extracellular trap formation | UBE3A   |
| GeneCards | Neutrophil extracellular trap formation | CCS     |
| GeneCards | Neutrophil extracellular trap formation | RMDN2   |
| GeneCards | Neutrophil extracellular trap formation | RIPK4   |
| GeneCards | Neutrophil extracellular trap formation | SLC23A1 |
| GeneCards | Neutrophil extracellular trap formation | SIDT2   |
| GeneCards | Neutrophil extracellular trap formation | RRAGC   |
| GeneCards | Neutrophil extracellular trap formation | SLC44A3 |
| GeneCards | Neutrophil extracellular trap formation | LMAN2   |
| GeneCards | Neutrophil extracellular trap formation | ALDOA   |
| GeneCards | Neutrophil extracellular trap formation | GRIK3   |
| GeneCards | Neutrophil extracellular trap formation | NHLRC2  |
| GeneCards | Neutrophil extracellular trap formation | TPH1    |
| GeneCards | Neutrophil extracellular trap formation | ADGRL4  |
| GeneCards | Neutrophil extracellular trap formation | H4C11   |
| GeneCards | Neutrophil extracellular trap formation | H4C12   |

|           |                                         |          |
|-----------|-----------------------------------------|----------|
| GeneCards | Neutrophil extracellular trap formation | SERTAD3  |
| GeneCards | Neutrophil extracellular trap formation | CDC14A   |
| GeneCards | Neutrophil extracellular trap formation | INTS4    |
| GeneCards | Neutrophil extracellular trap formation | PCYOX1   |
| GeneCards | Neutrophil extracellular trap formation | TRIP6    |
| GeneCards | Neutrophil extracellular trap formation | CGB5     |
| GeneCards | Neutrophil extracellular trap formation | FHL3     |
| GeneCards | Neutrophil extracellular trap formation | NIPSNAP2 |
| GeneCards | Neutrophil extracellular trap formation | LARP4    |
| GeneCards | Neutrophil extracellular trap formation | NCDN     |
| GeneCards | Neutrophil extracellular trap formation | CELSR3   |
| GeneCards | Neutrophil extracellular trap formation | LRRC59   |
| GeneCards | Neutrophil extracellular trap formation | LTV1     |
| GeneCards | Neutrophil extracellular trap formation | POLB     |
| GeneCards | Neutrophil extracellular trap formation | DHRS9    |
| GeneCards | Neutrophil extracellular trap formation | ARL8B    |
| GeneCards | Neutrophil extracellular trap formation | PRICKLE2 |
| GeneCards | Neutrophil extracellular trap formation | STX12    |
| GeneCards | Neutrophil extracellular trap formation | KLRC4    |
| GeneCards | Neutrophil extracellular trap formation | OMP      |
| GeneCards | Neutrophil extracellular trap formation | RPA3     |
| GeneCards | Neutrophil extracellular trap formation | DEPTOR   |

|           |                                         |         |
|-----------|-----------------------------------------|---------|
| GeneCards | Neutrophil extracellular trap formation | H3-3B   |
| GeneCards | Neutrophil extracellular trap formation | MAPRE2  |
| GeneCards | Neutrophil extracellular trap formation | ERBIN   |
| GeneCards | Neutrophil extracellular trap formation | PHF6    |
| GeneCards | Neutrophil extracellular trap formation | SLC39A9 |
| GeneCards | Neutrophil extracellular trap formation | COX4I1  |
| GeneCards | Neutrophil extracellular trap formation | LMAN1   |
| GeneCards | Neutrophil extracellular trap formation | PRRC2B  |
| GeneCards | Neutrophil extracellular trap formation | TAPBPL  |
| GeneCards | Neutrophil extracellular trap formation | VPS16   |
| GeneCards | Neutrophil extracellular trap formation | RPP14   |
| GeneCards | Neutrophil extracellular trap formation | AKR1B10 |
| GeneCards | Neutrophil extracellular trap formation | H2BC3   |
| GeneCards | Neutrophil extracellular trap formation | ADCY3   |
| GeneCards | Neutrophil extracellular trap formation | TRPC5   |
| GeneCards | Neutrophil extracellular trap formation | UMPS    |
| GeneCards | Neutrophil extracellular trap formation | H2BC5   |
| GeneCards | Neutrophil extracellular trap formation | CDH16   |
| GeneCards | Neutrophil extracellular trap formation | SNAI2   |
| GeneCards | Neutrophil extracellular trap formation | SLC16A4 |
| GeneCards | Neutrophil extracellular trap formation | DCAF1   |
| GeneCards | Neutrophil extracellular trap formation | MSH3    |

|           |                                         |          |
|-----------|-----------------------------------------|----------|
| GeneCards | Neutrophil extracellular trap formation | TMEM11   |
| GeneCards | Neutrophil extracellular trap formation | MRPS22   |
| GeneCards | Neutrophil extracellular trap formation | ARHGAP23 |
| GeneCards | Neutrophil extracellular trap formation | PTBP1    |
| GeneCards | Neutrophil extracellular trap formation | INTS8    |
| GeneCards | Neutrophil extracellular trap formation | PRIM1    |
| GeneCards | Neutrophil extracellular trap formation | FOXJ2    |
| GeneCards | Neutrophil extracellular trap formation | ARSH     |
| GeneCards | Neutrophil extracellular trap formation | STK11IP  |
| GeneCards | Neutrophil extracellular trap formation | TPX2     |
| GeneCards | Neutrophil extracellular trap formation | TIMM8B   |
| GeneCards | Neutrophil extracellular trap formation | C6orf89  |
| GeneCards | Neutrophil extracellular trap formation | PTCH1    |
| GeneCards | Neutrophil extracellular trap formation | ZFAND4   |
| GeneCards | Neutrophil extracellular trap formation | CFHR2    |
| GeneCards | Neutrophil extracellular trap formation | PIH1D1   |
| GeneCards | Neutrophil extracellular trap formation | GK       |
| GeneCards | Neutrophil extracellular trap formation | POLR1A   |
| GeneCards | Neutrophil extracellular trap formation | TBC1D5   |
| GeneCards | Neutrophil extracellular trap formation | PSME3    |
| GeneCards | Neutrophil extracellular trap formation | CAVIN1   |
| GeneCards | Neutrophil extracellular trap formation | CPB1     |

|           |                                         |           |
|-----------|-----------------------------------------|-----------|
| GeneCards | Neutrophil extracellular trap formation | ATAD1     |
| GeneCards | Neutrophil extracellular trap formation | ZNF300    |
| GeneCards | Neutrophil extracellular trap formation | RIPK2     |
| GeneCards | Neutrophil extracellular trap formation | GFRA2     |
| GeneCards | Neutrophil extracellular trap formation | NTM       |
| GeneCards | Neutrophil extracellular trap formation | PTGIS     |
| GeneCards | Neutrophil extracellular trap formation | RNF43     |
| GeneCards | Neutrophil extracellular trap formation | LRRC37BP1 |
| GeneCards | Neutrophil extracellular trap formation | GRIK1     |
| GeneCards | Neutrophil extracellular trap formation | ALG8      |
| GeneCards | Neutrophil extracellular trap formation | USP54     |
| GeneCards | Neutrophil extracellular trap formation | ABHD17A   |
| GeneCards | Neutrophil extracellular trap formation | MYCBP2    |
| GeneCards | Neutrophil extracellular trap formation | SEPTIN1   |
| GeneCards | Neutrophil extracellular trap formation | ZNF260    |
| GeneCards | Neutrophil extracellular trap formation | TCTN3     |
| GeneCards | Neutrophil extracellular trap formation | VPS37B    |
| GeneCards | Neutrophil extracellular trap formation | ZNF16     |
| GeneCards | Neutrophil extracellular trap formation | WFS1      |
| GeneCards | Neutrophil extracellular trap formation | NSFL1C    |
| GeneCards | Neutrophil extracellular trap formation | CYC1      |
| GeneCards | Neutrophil extracellular trap formation | NCAPD2    |

|           |                                         |          |
|-----------|-----------------------------------------|----------|
| GeneCards | Neutrophil extracellular trap formation | DSTN     |
| GeneCards | Neutrophil extracellular trap formation | LSM4     |
| GeneCards | Neutrophil extracellular trap formation | CLEC1B   |
| GeneCards | Neutrophil extracellular trap formation | SNX2     |
| GeneCards | Neutrophil extracellular trap formation | KATNB1   |
| GeneCards | Neutrophil extracellular trap formation | DUSP9    |
| GeneCards | Neutrophil extracellular trap formation | UBXN7    |
| GeneCards | Neutrophil extracellular trap formation | COMMD10  |
| GeneCards | Neutrophil extracellular trap formation | RNF111   |
| GeneCards | Neutrophil extracellular trap formation | INPP5A   |
| GeneCards | Neutrophil extracellular trap formation | PCDHB10  |
| GeneCards | Neutrophil extracellular trap formation | PCDHB13  |
| GeneCards | Neutrophil extracellular trap formation | MAPK8IP1 |
| GeneCards | Neutrophil extracellular trap formation | ASB13    |
| GeneCards | Neutrophil extracellular trap formation | NDUFA10  |
| GeneCards | Neutrophil extracellular trap formation | GTF2H1   |
| GeneCards | Neutrophil extracellular trap formation | FCSK     |
| GeneCards | Neutrophil extracellular trap formation | USP7     |
| GeneCards | Neutrophil extracellular trap formation | TFCP2    |
| GeneCards | Neutrophil extracellular trap formation | MUC13    |
| GeneCards | Neutrophil extracellular trap formation | POLR2C   |
| GeneCards | Neutrophil extracellular trap formation | NRG2     |

|           |                                         |          |
|-----------|-----------------------------------------|----------|
| GeneCards | Neutrophil extracellular trap formation | NR0B1    |
| GeneCards | Neutrophil extracellular trap formation | SCN10A   |
| GeneCards | Neutrophil extracellular trap formation | CCT5     |
| GeneCards | Neutrophil extracellular trap formation | RRP8     |
| GeneCards | Neutrophil extracellular trap formation | PHGDH    |
| GeneCards | Neutrophil extracellular trap formation | MAN2A1   |
| GeneCards | Neutrophil extracellular trap formation | SLMAP    |
| GeneCards | Neutrophil extracellular trap formation | SFT2D2   |
| GeneCards | Neutrophil extracellular trap formation | LIPG     |
| GeneCards | Neutrophil extracellular trap formation | RAN      |
| GeneCards | Neutrophil extracellular trap formation | MFSD2A   |
| GeneCards | Neutrophil extracellular trap formation | CPA4     |
| GeneCards | Neutrophil extracellular trap formation | DDHD1    |
| GeneCards | Neutrophil extracellular trap formation | PPP1R15B |
| GeneCards | Neutrophil extracellular trap formation | GJC1     |
| GeneCards | Neutrophil extracellular trap formation | OS9      |
| GeneCards | Neutrophil extracellular trap formation | GCM1     |
| GeneCards | Neutrophil extracellular trap formation | VPS4A    |
| GeneCards | Neutrophil extracellular trap formation | STRIP1   |
| GeneCards | Neutrophil extracellular trap formation | NPL      |
| GeneCards | Neutrophil extracellular trap formation | CEP192   |
| GeneCards | Neutrophil extracellular trap formation | RAD18    |



|           |                                         |         |
|-----------|-----------------------------------------|---------|
| GeneCards | Neutrophil extracellular trap formation | FXYD4   |
| GeneCards | Neutrophil extracellular trap formation | TDP1    |
| GeneCards | Neutrophil extracellular trap formation | SCAMP4  |
| GeneCards | Neutrophil extracellular trap formation | CCL27   |
| GeneCards | Neutrophil extracellular trap formation | CA3     |
| GeneCards | Neutrophil extracellular trap formation | CPSF7   |
| GeneCards | Neutrophil extracellular trap formation | RNF149  |
| GeneCards | Neutrophil extracellular trap formation | TPR     |
| GeneCards | Neutrophil extracellular trap formation | SETX    |
| GeneCards | Neutrophil extracellular trap formation | PTMA    |
| GeneCards | Neutrophil extracellular trap formation | PSMD11  |
| GeneCards | Neutrophil extracellular trap formation | NDUFA13 |
| GeneCards | Neutrophil extracellular trap formation | TOMM70  |
| GeneCards | Neutrophil extracellular trap formation | KCNJ1   |
| GeneCards | Neutrophil extracellular trap formation | NMNAT2  |
| GeneCards | Neutrophil extracellular trap formation | BTN3A3  |
| GeneCards | Neutrophil extracellular trap formation | SPINK7  |
| GeneCards | Neutrophil extracellular trap formation | ASGR2   |
| GeneCards | Neutrophil extracellular trap formation | IQCB1   |
| GeneCards | Neutrophil extracellular trap formation | PABPC1  |
| GeneCards | Neutrophil extracellular trap formation | ANAPC7  |
| GeneCards | Neutrophil extracellular trap formation | EXOC2   |

|           |                                         |          |
|-----------|-----------------------------------------|----------|
| GeneCards | Neutrophil extracellular trap formation | PCDHB5   |
| GeneCards | Neutrophil extracellular trap formation | MCM7     |
| GeneCards | Neutrophil extracellular trap formation | KCNE1    |
| GeneCards | Neutrophil extracellular trap formation | APOOL    |
| GeneCards | Neutrophil extracellular trap formation | URI1     |
| GeneCards | Neutrophil extracellular trap formation | IFFO1    |
| GeneCards | Neutrophil extracellular trap formation | STARD3NL |
| GeneCards | Neutrophil extracellular trap formation | TUBB4A   |
| GeneCards | Neutrophil extracellular trap formation | INA      |
| GeneCards | Neutrophil extracellular trap formation | H4C14    |
| GeneCards | Neutrophil extracellular trap formation | ZNF652   |
| GeneCards | Neutrophil extracellular trap formation | SRA1     |
| GeneCards | Neutrophil extracellular trap formation | CDC16    |
| GeneCards | Neutrophil extracellular trap formation | H3C14    |
| GeneCards | Neutrophil extracellular trap formation | GRIK5    |
| GeneCards | Neutrophil extracellular trap formation | SCN2B    |
| GeneCards | Neutrophil extracellular trap formation | CSN2     |
| GeneCards | Neutrophil extracellular trap formation | PRPF38B  |
| GeneCards | Neutrophil extracellular trap formation | CNOT7    |
| GeneCards | Neutrophil extracellular trap formation | FSTL3    |
| GeneCards | Neutrophil extracellular trap formation | SPOUT1   |
| GeneCards | Neutrophil extracellular trap formation | RBBP7    |

|           |                                         |          |
|-----------|-----------------------------------------|----------|
| GeneCards | Neutrophil extracellular trap formation | PHF3     |
| GeneCards | Neutrophil extracellular trap formation | PPM1B    |
| GeneCards | Neutrophil extracellular trap formation | SLC25A15 |
| GeneCards | Neutrophil extracellular trap formation | THNSL2   |
| GeneCards | Neutrophil extracellular trap formation | NXF1     |
| GeneCards | Neutrophil extracellular trap formation | ASF1B    |
| GeneCards | Neutrophil extracellular trap formation | LINGO2   |
| GeneCards | Neutrophil extracellular trap formation | EIF4G2   |
| GeneCards | Neutrophil extracellular trap formation | BMI1     |
| GeneCards | Neutrophil extracellular trap formation | BRI3     |
| GeneCards | Neutrophil extracellular trap formation | FMR1     |
| GeneCards | Neutrophil extracellular trap formation | LONP1    |
| GeneCards | Neutrophil extracellular trap formation | C5orf46  |
| GeneCards | Neutrophil extracellular trap formation | TMEM30A  |
| GeneCards | Neutrophil extracellular trap formation | DNAJC1   |
| GeneCards | Neutrophil extracellular trap formation | SLC25A10 |
| GeneCards | Neutrophil extracellular trap formation | ROM1     |
| GeneCards | Neutrophil extracellular trap formation | VPS26C   |
| GeneCards | Neutrophil extracellular trap formation | KIRREL2  |
| GeneCards | Neutrophil extracellular trap formation | CEP19    |
| GeneCards | Neutrophil extracellular trap formation | USP8     |
| GeneCards | Neutrophil extracellular trap formation | POLR2E   |

|           |                                         |           |
|-----------|-----------------------------------------|-----------|
| GeneCards | Neutrophil extracellular trap formation | PPIF      |
| GeneCards | Neutrophil extracellular trap formation | CEP350    |
| GeneCards | Neutrophil extracellular trap formation | C1GALT1C1 |
| GeneCards | Neutrophil extracellular trap formation | SARDH     |
| GeneCards | Neutrophil extracellular trap formation | DXO       |
| GeneCards | Neutrophil extracellular trap formation | KCNJ3     |
| GeneCards | Neutrophil extracellular trap formation | BMP2K     |
| GeneCards | Neutrophil extracellular trap formation | RETREG2   |
| GeneCards | Neutrophil extracellular trap formation | DKK2      |
| GeneCards | Neutrophil extracellular trap formation | HHIP      |
| GeneCards | Neutrophil extracellular trap formation | TAF1      |
| GeneCards | Neutrophil extracellular trap formation | ELAPOR1   |
| GeneCards | Neutrophil extracellular trap formation | GTF3C4    |
| GeneCards | Neutrophil extracellular trap formation | IPO4      |
| GeneCards | Neutrophil extracellular trap formation | TMEM9B    |
| GeneCards | Neutrophil extracellular trap formation | ZNF566    |
| GeneCards | Neutrophil extracellular trap formation | PATL1     |
| GeneCards | Neutrophil extracellular trap formation | ZNF609    |
| GeneCards | Neutrophil extracellular trap formation | SPTY2D1   |
| GeneCards | Neutrophil extracellular trap formation | SNX10     |
| GeneCards | Neutrophil extracellular trap formation | TBKBP1    |
| GeneCards | Neutrophil extracellular trap formation | PDPR      |

|           |                                         |          |
|-----------|-----------------------------------------|----------|
| GeneCards | Neutrophil extracellular trap formation | EHD1     |
| GeneCards | Neutrophil extracellular trap formation | TESK1    |
| GeneCards | Neutrophil extracellular trap formation | LRCH3    |
| GeneCards | Neutrophil extracellular trap formation | NFATC2IP |
| GeneCards | Neutrophil extracellular trap formation | RABAC1   |
| GeneCards | Neutrophil extracellular trap formation | PDHA1    |
| GeneCards | Neutrophil extracellular trap formation | REV1     |
| GeneCards | Neutrophil extracellular trap formation | VDAC3    |
| GeneCards | Neutrophil extracellular trap formation | MIPEP    |
| GeneCards | Neutrophil extracellular trap formation | LGALS13  |
| GeneCards | Neutrophil extracellular trap formation | NCKAP5L  |
| GeneCards | Neutrophil extracellular trap formation | AMIGO1   |
| GeneCards | Neutrophil extracellular trap formation | FEN1     |
| GeneCards | Neutrophil extracellular trap formation | PLK2     |
| GeneCards | Neutrophil extracellular trap formation | RPL13    |
| GeneCards | Neutrophil extracellular trap formation | TMEFF2   |
| GeneCards | Neutrophil extracellular trap formation | SYTL2    |
| GeneCards | Neutrophil extracellular trap formation | CEP78    |
| GeneCards | Neutrophil extracellular trap formation | APOM     |
| GeneCards | Neutrophil extracellular trap formation | PSMA4    |
| GeneCards | Neutrophil extracellular trap formation | SNRPE    |
| GeneCards | Neutrophil extracellular trap formation | PSMB7    |

|           |                                         |         |
|-----------|-----------------------------------------|---------|
| GeneCards | Neutrophil extracellular trap formation | RPL28   |
| GeneCards | Neutrophil extracellular trap formation | C1QL3   |
| GeneCards | Neutrophil extracellular trap formation | PIGS    |
| GeneCards | Neutrophil extracellular trap formation | PURB    |
| GeneCards | Neutrophil extracellular trap formation | SDE2    |
| GeneCards | Neutrophil extracellular trap formation | BPIFB1  |
| GeneCards | Neutrophil extracellular trap formation | MAP1S   |
| GeneCards | Neutrophil extracellular trap formation | OCRL    |
| GeneCards | Neutrophil extracellular trap formation | RPL22   |
| GeneCards | Neutrophil extracellular trap formation | SRRM2   |
| GeneCards | Neutrophil extracellular trap formation | IPO7    |
| GeneCards | Neutrophil extracellular trap formation | ZSWIM8  |
| GeneCards | Neutrophil extracellular trap formation | GSTK1   |
| GeneCards | Neutrophil extracellular trap formation | BNIP3   |
| GeneCards | Neutrophil extracellular trap formation | CDKL5   |
| GeneCards | Neutrophil extracellular trap formation | VDAC2   |
| GeneCards | Neutrophil extracellular trap formation | EHD3    |
| GeneCards | Neutrophil extracellular trap formation | TARBP2  |
| GeneCards | Neutrophil extracellular trap formation | B3GNT5  |
| GeneCards | Neutrophil extracellular trap formation | SDF2    |
| GeneCards | Neutrophil extracellular trap formation | PPP1R10 |
| GeneCards | Neutrophil extracellular trap formation | RAB29   |

|           |                                         |          |
|-----------|-----------------------------------------|----------|
| GeneCards | Neutrophil extracellular trap formation | POLE     |
| GeneCards | Neutrophil extracellular trap formation | MTCL1    |
| GeneCards | Neutrophil extracellular trap formation | SEC23B   |
| GeneCards | Neutrophil extracellular trap formation | SCAF8    |
| GeneCards | Neutrophil extracellular trap formation | SYNGR2   |
| GeneCards | Neutrophil extracellular trap formation | TTC27    |
| GeneCards | Neutrophil extracellular trap formation | ENPEP    |
| GeneCards | Neutrophil extracellular trap formation | LRP3     |
| GeneCards | Neutrophil extracellular trap formation | TOP2B    |
| GeneCards | Neutrophil extracellular trap formation | POLE3    |
| GeneCards | Neutrophil extracellular trap formation | RPL23A   |
| GeneCards | Neutrophil extracellular trap formation | MLPH     |
| GeneCards | Neutrophil extracellular trap formation | MAGEA1   |
| GeneCards | Neutrophil extracellular trap formation | HNRNPR   |
| GeneCards | Neutrophil extracellular trap formation | NACA     |
| GeneCards | Neutrophil extracellular trap formation | MAN1A1   |
| GeneCards | Neutrophil extracellular trap formation | CHMP5    |
| GeneCards | Neutrophil extracellular trap formation | ACBD5    |
| GeneCards | Neutrophil extracellular trap formation | QRICH1   |
| GeneCards | Neutrophil extracellular trap formation | ZNF764   |
| GeneCards | Neutrophil extracellular trap formation | PCBP2    |
| GeneCards | Neutrophil extracellular trap formation | C16orf89 |

|           |                                         |           |
|-----------|-----------------------------------------|-----------|
| GeneCards | Neutrophil extracellular trap formation | MMS19     |
| GeneCards | Neutrophil extracellular trap formation | SLC16A11  |
| GeneCards | Neutrophil extracellular trap formation | SIPA1L1   |
| GeneCards | Neutrophil extracellular trap formation | EEF2K     |
| GeneCards | Neutrophil extracellular trap formation | ZDHHC4    |
| GeneCards | Neutrophil extracellular trap formation | CDK14     |
| GeneCards | Neutrophil extracellular trap formation | SERPINA12 |
| GeneCards | Neutrophil extracellular trap formation | ADRB3     |
| GeneCards | Neutrophil extracellular trap formation | MPI       |
| GeneCards | Neutrophil extracellular trap formation | PUF60     |
| GeneCards | Neutrophil extracellular trap formation | HIF1AN    |
| GeneCards | Neutrophil extracellular trap formation | SCGB1D4   |
| GeneCards | Neutrophil extracellular trap formation | AKAP8     |
| GeneCards | Neutrophil extracellular trap formation | CNBP      |
| GeneCards | Neutrophil extracellular trap formation | PFDN4     |
| GeneCards | Neutrophil extracellular trap formation | SLAMF9    |
| GeneCards | Neutrophil extracellular trap formation | CHD1L     |
| GeneCards | Neutrophil extracellular trap formation | PRSS55    |
| GeneCards | Neutrophil extracellular trap formation | KLC1      |
| GeneCards | Neutrophil extracellular trap formation | TRB       |
| GeneCards | Neutrophil extracellular trap formation | NUDT9     |
| GeneCards | Neutrophil extracellular trap formation | XRCC4     |



|           |                                         |           |
|-----------|-----------------------------------------|-----------|
| GeneCards | Neutrophil extracellular trap formation | MYO1F     |
| GeneCards | Neutrophil extracellular trap formation | ABTB1     |
| GeneCards | Neutrophil extracellular trap formation | FKBP8     |
| GeneCards | Neutrophil extracellular trap formation | SLAIN1    |
| GeneCards | Neutrophil extracellular trap formation | KMO       |
| GeneCards | Neutrophil extracellular trap formation | PCSK2     |
| GeneCards | Neutrophil extracellular trap formation | FAM210B   |
| GeneCards | Neutrophil extracellular trap formation | ZNF146    |
| GeneCards | Neutrophil extracellular trap formation | BLVRA     |
| GeneCards | Neutrophil extracellular trap formation | BMPR1A    |
| GeneCards | Neutrophil extracellular trap formation | CRIM1     |
| GeneCards | Neutrophil extracellular trap formation | LIPF      |
| GeneCards | Neutrophil extracellular trap formation | PILRB     |
| GeneCards | Neutrophil extracellular trap formation | PTPN5     |
| GeneCards | Neutrophil extracellular trap formation | TOR1AIP2  |
| GeneCards | Neutrophil extracellular trap formation | PSMD4     |
| GeneCards | Neutrophil extracellular trap formation | TNFAIP8L3 |
| GeneCards | Neutrophil extracellular trap formation | FNDC3A    |
| GeneCards | Neutrophil extracellular trap formation | ORMDL1    |
| GeneCards | Neutrophil extracellular trap formation | RSL1D1    |
| GeneCards | Neutrophil extracellular trap formation | FOXRED2   |
| GeneCards | Neutrophil extracellular trap formation | SNX1      |

|           |                                         |         |
|-----------|-----------------------------------------|---------|
| GeneCards | Neutrophil extracellular trap formation | TMEM165 |
| GeneCards | Neutrophil extracellular trap formation | MUL1    |
| GeneCards | Neutrophil extracellular trap formation | C2orf88 |
| GeneCards | Neutrophil extracellular trap formation | EIF2S2  |
| GeneCards | Neutrophil extracellular trap formation | SPTBN4  |
| GeneCards | Neutrophil extracellular trap formation | MRPL48  |
| GeneCards | Neutrophil extracellular trap formation | CBLN3   |
| GeneCards | Neutrophil extracellular trap formation | ABHD14B |
| GeneCards | Neutrophil extracellular trap formation | PIGF    |
| GeneCards | Neutrophil extracellular trap formation | PPP2R5D |
| GeneCards | Neutrophil extracellular trap formation | RRP12   |
| GeneCards | Neutrophil extracellular trap formation | CEP57L1 |
| GeneCards | Neutrophil extracellular trap formation | ESRRA   |
| GeneCards | Neutrophil extracellular trap formation | HOXA1   |
| GeneCards | Neutrophil extracellular trap formation | TMED7   |
| GeneCards | Neutrophil extracellular trap formation | MAP7D1  |
| GeneCards | Neutrophil extracellular trap formation | CKAP5   |
| GeneCards | Neutrophil extracellular trap formation | CACNB2  |
| GeneCards | Neutrophil extracellular trap formation | UBR5    |
| GeneCards | Neutrophil extracellular trap formation | SNX32   |
| GeneCards | Neutrophil extracellular trap formation | HCST    |
| GeneCards | Neutrophil extracellular trap formation | ARL6IP1 |

|           |                                         |         |
|-----------|-----------------------------------------|---------|
| GeneCards | Neutrophil extracellular trap formation | SYPL2   |
| GeneCards | Neutrophil extracellular trap formation | ELP1    |
| GeneCards | Neutrophil extracellular trap formation | PKP2    |
| GeneCards | Neutrophil extracellular trap formation | AVP     |
| GeneCards | Neutrophil extracellular trap formation | BSCL2   |
| GeneCards | Neutrophil extracellular trap formation | FARSB   |
| GeneCards | Neutrophil extracellular trap formation | TOP1MT  |
| GeneCards | Neutrophil extracellular trap formation | WFDC5   |
| GeneCards | Neutrophil extracellular trap formation | ERAL1   |
| GeneCards | Neutrophil extracellular trap formation | NPHS2   |
| GeneCards | Neutrophil extracellular trap formation | KLF16   |
| GeneCards | Neutrophil extracellular trap formation | PRAP1   |
| GeneCards | Neutrophil extracellular trap formation | CNPY3   |
| GeneCards | Neutrophil extracellular trap formation | SP140L  |
| GeneCards | Neutrophil extracellular trap formation | FOXM1   |
| GeneCards | Neutrophil extracellular trap formation | GOLGA1  |
| GeneCards | Neutrophil extracellular trap formation | DEDD2   |
| GeneCards | Neutrophil extracellular trap formation | CYP26B1 |
| GeneCards | Neutrophil extracellular trap formation | RAD9A   |
| GeneCards | Neutrophil extracellular trap formation | MIR200B |
| GeneCards | Neutrophil extracellular trap formation | CPE     |
| GeneCards | Neutrophil extracellular trap formation | CDKN1C  |

|           |                                         |          |
|-----------|-----------------------------------------|----------|
| GeneCards | Neutrophil extracellular trap formation | ATL2     |
| GeneCards | Neutrophil extracellular trap formation | B3GALNT1 |
| GeneCards | Neutrophil extracellular trap formation | SCN4B    |
| GeneCards | Neutrophil extracellular trap formation | GREM2    |
| GeneCards | Neutrophil extracellular trap formation | SH3TC2   |
| GeneCards | Neutrophil extracellular trap formation | VPS37C   |
| GeneCards | Neutrophil extracellular trap formation | MUC21    |
| GeneCards | Neutrophil extracellular trap formation | PCSK1N   |
| GeneCards | Neutrophil extracellular trap formation | OSTM1    |
| GeneCards | Neutrophil extracellular trap formation | RGMA     |
| GeneCards | Neutrophil extracellular trap formation | HGH1     |
| GeneCards | Neutrophil extracellular trap formation | TUBGCP2  |
| GeneCards | Neutrophil extracellular trap formation | HHIPL2   |
| GeneCards | Neutrophil extracellular trap formation | TNFRSF19 |
| GeneCards | Neutrophil extracellular trap formation | TMEM25   |
| GeneCards | Neutrophil extracellular trap formation | PTGFRN   |
| GeneCards | Neutrophil extracellular trap formation | SEMA4C   |
| GeneCards | Neutrophil extracellular trap formation | LYPD6    |
| GeneCards | Neutrophil extracellular trap formation | NDUFAB1  |
| GeneCards | Neutrophil extracellular trap formation | LZTS2    |
| GeneCards | Neutrophil extracellular trap formation | IFNE     |
| GeneCards | Neutrophil extracellular trap formation | GLIPR1L1 |

|           |                                         |        |
|-----------|-----------------------------------------|--------|
| GeneCards | Neutrophil extracellular trap formation | ZZEF1  |
| GeneCards | Neutrophil extracellular trap formation | MTCH2  |
| GeneCards | Neutrophil extracellular trap formation | TRAF5  |
| GeneCards | Neutrophil extracellular trap formation | SUOX   |
| GeneCards | Neutrophil extracellular trap formation | TTL12  |
| GeneCards | Neutrophil extracellular trap formation | EMC8   |
| GeneCards | Neutrophil extracellular trap formation | RNF11  |
| GeneCards | Neutrophil extracellular trap formation | SYAP1  |
| GeneCards | Neutrophil extracellular trap formation | PTPN14 |
| GeneCards | Neutrophil extracellular trap formation | MAF    |
| GeneCards | Neutrophil extracellular trap formation | NEK9   |
| GeneCards | Neutrophil extracellular trap formation | H1-10  |
| GeneCards | Neutrophil extracellular trap formation | SWT1   |
| GeneCards | Neutrophil extracellular trap formation | DCTN1  |
| GeneCards | Neutrophil extracellular trap formation | EFNB1  |
| GeneCards | Neutrophil extracellular trap formation | CST5   |
| GeneCards | Neutrophil extracellular trap formation | COIL   |
| GeneCards | Neutrophil extracellular trap formation | ARID5A |
| GeneCards | Neutrophil extracellular trap formation | BCAR3  |
| GeneCards | Neutrophil extracellular trap formation | HOXA13 |
| GeneCards | Neutrophil extracellular trap formation | SDF2L1 |
| GeneCards | Neutrophil extracellular trap formation | PPP6R2 |

|           |                                         |          |
|-----------|-----------------------------------------|----------|
| GeneCards | Neutrophil extracellular trap formation | GOSR1    |
| GeneCards | Neutrophil extracellular trap formation | ID3      |
| GeneCards | Neutrophil extracellular trap formation | MLC1     |
| GeneCards | Neutrophil extracellular trap formation | DIAPH3   |
| GeneCards | Neutrophil extracellular trap formation | CHMP1A   |
| GeneCards | Neutrophil extracellular trap formation | HOXA7    |
| GeneCards | Neutrophil extracellular trap formation | MAN1A2   |
| GeneCards | Neutrophil extracellular trap formation | TRIP12   |
| GeneCards | Neutrophil extracellular trap formation | TGOLN2   |
| GeneCards | Neutrophil extracellular trap formation | ZNF567   |
| GeneCards | Neutrophil extracellular trap formation | ANKRD28  |
| GeneCards | Neutrophil extracellular trap formation | FAM193A  |
| GeneCards | Neutrophil extracellular trap formation | MEPCE    |
| GeneCards | Neutrophil extracellular trap formation | NDUFS1   |
| GeneCards | Neutrophil extracellular trap formation | TMEM258  |
| GeneCards | Neutrophil extracellular trap formation | BEND3    |
| GeneCards | Neutrophil extracellular trap formation | MAFF     |
| GeneCards | Neutrophil extracellular trap formation | SACM1L   |
| GeneCards | Neutrophil extracellular trap formation | SLC35B4  |
| GeneCards | Neutrophil extracellular trap formation | PAN2     |
| GeneCards | Neutrophil extracellular trap formation | RNU4ATAC |
| GeneCards | Neutrophil extracellular trap formation | LNPK     |

|           |                                         |          |
|-----------|-----------------------------------------|----------|
| GeneCards | Neutrophil extracellular trap formation | CBX4     |
| GeneCards | Neutrophil extracellular trap formation | CCNY     |
| GeneCards | Neutrophil extracellular trap formation | GPR39    |
| GeneCards | Neutrophil extracellular trap formation | TYRP1    |
| GeneCards | Neutrophil extracellular trap formation | TPH2     |
| GeneCards | Neutrophil extracellular trap formation | WDR7     |
| GeneCards | Neutrophil extracellular trap formation | MIR335   |
| GeneCards | Neutrophil extracellular trap formation | CEP70    |
| GeneCards | Neutrophil extracellular trap formation | MTM1     |
| GeneCards | Neutrophil extracellular trap formation | RBM39    |
| GeneCards | Neutrophil extracellular trap formation | FGF6     |
| GeneCards | Neutrophil extracellular trap formation | RNF20    |
| GeneCards | Neutrophil extracellular trap formation | DRG1     |
| GeneCards | Neutrophil extracellular trap formation | CCN6     |
| GeneCards | Neutrophil extracellular trap formation | MAZ      |
| GeneCards | Neutrophil extracellular trap formation | MC4R     |
| GeneCards | Neutrophil extracellular trap formation | CST2     |
| GeneCards | Neutrophil extracellular trap formation | MRGPRX1  |
| GeneCards | Neutrophil extracellular trap formation | TMLHE    |
| GeneCards | Neutrophil extracellular trap formation | DHPS     |
| GeneCards | Neutrophil extracellular trap formation | ABHD16A  |
| GeneCards | Neutrophil extracellular trap formation | SLC26A11 |

|           |                                         |          |
|-----------|-----------------------------------------|----------|
| GeneCards | Neutrophil extracellular trap formation | INHBB    |
| GeneCards | Neutrophil extracellular trap formation | HTN3     |
| GeneCards | Neutrophil extracellular trap formation | IRF2BPL  |
| GeneCards | Neutrophil extracellular trap formation | PIGM     |
| GeneCards | Neutrophil extracellular trap formation | TRMT112  |
| GeneCards | Neutrophil extracellular trap formation | NTPCR    |
| GeneCards | Neutrophil extracellular trap formation | ADGRB2   |
| GeneCards | Neutrophil extracellular trap formation | TLL4     |
| GeneCards | Neutrophil extracellular trap formation | TPP1     |
| GeneCards | Neutrophil extracellular trap formation | FAM24B   |
| GeneCards | Neutrophil extracellular trap formation | FGD4     |
| GeneCards | Neutrophil extracellular trap formation | SOX6     |
| GeneCards | Neutrophil extracellular trap formation | HSD17B11 |
| GeneCards | Neutrophil extracellular trap formation | RPIA     |
| GeneCards | Neutrophil extracellular trap formation | LONP2    |
| GeneCards | Neutrophil extracellular trap formation | EBNA1BP2 |
| GeneCards | Neutrophil extracellular trap formation | NISCH    |
| GeneCards | Neutrophil extracellular trap formation | NOM1     |
| GeneCards | Neutrophil extracellular trap formation | ADSL     |
| GeneCards | Neutrophil extracellular trap formation | CHMP3    |
| GeneCards | Neutrophil extracellular trap formation | UBL4A    |
| GeneCards | Neutrophil extracellular trap formation | ULK1     |



|           |                                         |         |
|-----------|-----------------------------------------|---------|
| GeneCards | Neutrophil extracellular trap formation | RPS6    |
| GeneCards | Neutrophil extracellular trap formation | KNL1    |
| GeneCards | Neutrophil extracellular trap formation | SYT11   |
| GeneCards | Neutrophil extracellular trap formation | SEMA6D  |
| GeneCards | Neutrophil extracellular trap formation | BTF3    |
| GeneCards | Neutrophil extracellular trap formation | RDH11   |
| GeneCards | Neutrophil extracellular trap formation | USP13   |
| GeneCards | Neutrophil extracellular trap formation | CYFIP2  |
| GeneCards | Neutrophil extracellular trap formation | NEFH    |
| GeneCards | Neutrophil extracellular trap formation | SOSTDC1 |
| GeneCards | Neutrophil extracellular trap formation | ABO     |
| GeneCards | Neutrophil extracellular trap formation | SMU1    |
| GeneCards | Neutrophil extracellular trap formation | ANKRD54 |
| GeneCards | Neutrophil extracellular trap formation | BLVRB   |
| GeneCards | Neutrophil extracellular trap formation | SF3A1   |
| GeneCards | Neutrophil extracellular trap formation | MTFR1L  |
| GeneCards | Neutrophil extracellular trap formation | ZFP82   |
| GeneCards | Neutrophil extracellular trap formation | EIPR1   |
| GeneCards | Neutrophil extracellular trap formation | ARMC5   |
| GeneCards | Neutrophil extracellular trap formation | SSRP1   |
| GeneCards | Neutrophil extracellular trap formation | MAPKAP1 |
| GeneCards | Neutrophil extracellular trap formation | GPR15LG |

|           |                                         |          |
|-----------|-----------------------------------------|----------|
| GeneCards | Neutrophil extracellular trap formation | MUC20    |
| GeneCards | Neutrophil extracellular trap formation | GET3     |
| GeneCards | Neutrophil extracellular trap formation | CYGB     |
| GeneCards | Neutrophil extracellular trap formation | IL23R    |
| GeneCards | Neutrophil extracellular trap formation | TMEM92   |
| GeneCards | Neutrophil extracellular trap formation | CACHD1   |
| GeneCards | Neutrophil extracellular trap formation | HDAC11   |
| GeneCards | Neutrophil extracellular trap formation | FBXW8    |
| GeneCards | Neutrophil extracellular trap formation | ST3GAL5  |
| GeneCards | Neutrophil extracellular trap formation | TBRG1    |
| GeneCards | Neutrophil extracellular trap formation | AQR      |
| GeneCards | Neutrophil extracellular trap formation | NAT2     |
| GeneCards | Neutrophil extracellular trap formation | RBBP4    |
| GeneCards | Neutrophil extracellular trap formation | KPNA1    |
| GeneCards | Neutrophil extracellular trap formation | ECH1     |
| GeneCards | Neutrophil extracellular trap formation | BOP1     |
| GeneCards | Neutrophil extracellular trap formation | NCOA6    |
| GeneCards | Neutrophil extracellular trap formation | SNRNP200 |
| GeneCards | Neutrophil extracellular trap formation | AKAP7    |
| GeneCards | Neutrophil extracellular trap formation | HSPE1    |
| GeneCards | Neutrophil extracellular trap formation | RBBP8    |
| GeneCards | Neutrophil extracellular trap formation | ZNF668   |

|           |                                         |         |
|-----------|-----------------------------------------|---------|
| GeneCards | Neutrophil extracellular trap formation | FMNL1   |
| GeneCards | Neutrophil extracellular trap formation | LMAN1L  |
| GeneCards | Neutrophil extracellular trap formation | RARS2   |
| GeneCards | Neutrophil extracellular trap formation | EEF1G   |
| GeneCards | Neutrophil extracellular trap formation | WDR19   |
| GeneCards | Neutrophil extracellular trap formation | VAC14   |
| GeneCards | Neutrophil extracellular trap formation | UCHL3   |
| GeneCards | Neutrophil extracellular trap formation | LYPD1   |
| GeneCards | Neutrophil extracellular trap formation | PCGF2   |
| GeneCards | Neutrophil extracellular trap formation | GALNT6  |
| GeneCards | Neutrophil extracellular trap formation | KPNA3   |
| GeneCards | Neutrophil extracellular trap formation | CCNL1   |
| GeneCards | Neutrophil extracellular trap formation | PHLDB1  |
| GeneCards | Neutrophil extracellular trap formation | SLX4    |
| GeneCards | Neutrophil extracellular trap formation | WDR11   |
| GeneCards | Neutrophil extracellular trap formation | TIMM17A |
| GeneCards | Neutrophil extracellular trap formation | IRS4    |
| GeneCards | Neutrophil extracellular trap formation | SMG5    |
| GeneCards | Neutrophil extracellular trap formation | UBAP2   |
| GeneCards | Neutrophil extracellular trap formation | PRSS53  |
| GeneCards | Neutrophil extracellular trap formation | JPT2    |
| GeneCards | Neutrophil extracellular trap formation | CLPTM1L |

|           |                                         |           |
|-----------|-----------------------------------------|-----------|
| GeneCards | Neutrophil extracellular trap formation | SREBF2    |
| GeneCards | Neutrophil extracellular trap formation | TMEM39B   |
| GeneCards | Neutrophil extracellular trap formation | MICAL2    |
| GeneCards | Neutrophil extracellular trap formation | TRIM37    |
| GeneCards | Neutrophil extracellular trap formation | KCNJ5-AS1 |
| GeneCards | Neutrophil extracellular trap formation | VWA8      |
| GeneCards | Neutrophil extracellular trap formation | TEAD1     |
| GeneCards | Neutrophil extracellular trap formation | CLCF1     |
| GeneCards | Neutrophil extracellular trap formation | IDUA      |
| GeneCards | Neutrophil extracellular trap formation | SUMF2     |
| GeneCards | Neutrophil extracellular trap formation | ZBTB1     |
| GeneCards | Neutrophil extracellular trap formation | MCM5      |
| GeneCards | Neutrophil extracellular trap formation | MTDH      |
| GeneCards | Neutrophil extracellular trap formation | ZCCHC14   |
| GeneCards | Neutrophil extracellular trap formation | KMT5A     |
| GeneCards | Neutrophil extracellular trap formation | ACIN1     |
| GeneCards | Neutrophil extracellular trap formation | FNDC1     |
| GeneCards | Neutrophil extracellular trap formation | PRDM8     |
| GeneCards | Neutrophil extracellular trap formation | NLGN3     |
| GeneCards | Neutrophil extracellular trap formation | IL17D     |
| GeneCards | Neutrophil extracellular trap formation | ACSF2     |
| GeneCards | Neutrophil extracellular trap formation | CYB5A     |

|           |                                         |          |
|-----------|-----------------------------------------|----------|
| GeneCards | Neutrophil extracellular trap formation | NKIRAS2  |
| GeneCards | Neutrophil extracellular trap formation | NDRG2    |
| GeneCards | Neutrophil extracellular trap formation | CEACAM20 |
| GeneCards | Neutrophil extracellular trap formation | NAE1     |
| GeneCards | Neutrophil extracellular trap formation | NPTXR    |
| GeneCards | Neutrophil extracellular trap formation | OVGP1    |
| GeneCards | Neutrophil extracellular trap formation | RHEB     |
| GeneCards | Neutrophil extracellular trap formation | MGAT4B   |
| GeneCards | Neutrophil extracellular trap formation | RALBP1   |
| GeneCards | Neutrophil extracellular trap formation | NDST1    |
| GeneCards | Neutrophil extracellular trap formation | EFTUD2   |
| GeneCards | Neutrophil extracellular trap formation | FAR1     |
| GeneCards | Neutrophil extracellular trap formation | RIMS1    |
| GeneCards | Neutrophil extracellular trap formation | RLBP1    |
| GeneCards | Neutrophil extracellular trap formation | GPR182   |
| GeneCards | Neutrophil extracellular trap formation | MED9     |
| GeneCards | Neutrophil extracellular trap formation | ZNF256   |
| GeneCards | Neutrophil extracellular trap formation | VOPP1    |
| GeneCards | Neutrophil extracellular trap formation | TMX4     |
| GeneCards | Neutrophil extracellular trap formation | DUSP26   |
| GeneCards | Neutrophil extracellular trap formation | RHBDD2   |
| GeneCards | Neutrophil extracellular trap formation | PPP6C    |

|           |                                         |          |
|-----------|-----------------------------------------|----------|
| GeneCards | Neutrophil extracellular trap formation | PDSS1    |
| GeneCards | Neutrophil extracellular trap formation | TM9SF4   |
| GeneCards | Neutrophil extracellular trap formation | FAM83H   |
| GeneCards | Neutrophil extracellular trap formation | SLC25A12 |
| GeneCards | Neutrophil extracellular trap formation | MYADM    |
| GeneCards | Neutrophil extracellular trap formation | WDFY3    |
| GeneCards | Neutrophil extracellular trap formation | DNHD1    |
| GeneCards | Neutrophil extracellular trap formation | KLHL21   |
| GeneCards | Neutrophil extracellular trap formation | SPACA5B  |
| GeneCards | Neutrophil extracellular trap formation | HIVEP2   |
| GeneCards | Neutrophil extracellular trap formation | UNC119B  |
| GeneCards | Neutrophil extracellular trap formation | GFRA1    |
| GeneCards | Neutrophil extracellular trap formation | CPEB3    |
| GeneCards | Neutrophil extracellular trap formation | EVL      |
| GeneCards | Neutrophil extracellular trap formation | HS6ST3   |
| GeneCards | Neutrophil extracellular trap formation | OSTN     |
| GeneCards | Neutrophil extracellular trap formation | TMEM230  |
| GeneCards | Neutrophil extracellular trap formation | TMBIM6   |
| GeneCards | Neutrophil extracellular trap formation | RPS27L   |
| GeneCards | Neutrophil extracellular trap formation | UBE2Z    |
| GeneCards | Neutrophil extracellular trap formation | WDR33    |
| GeneCards | Neutrophil extracellular trap formation | R3HDM1   |

|           |                                         |          |
|-----------|-----------------------------------------|----------|
| GeneCards | Neutrophil extracellular trap formation | CNTNAP1  |
| GeneCards | Neutrophil extracellular trap formation | ATP2C2   |
| GeneCards | Neutrophil extracellular trap formation | MAD2L1   |
| GeneCards | Neutrophil extracellular trap formation | CRIP2    |
| GeneCards | Neutrophil extracellular trap formation | CGB7     |
| GeneCards | Neutrophil extracellular trap formation | GPRC5B   |
| GeneCards | Neutrophil extracellular trap formation | NAP1L4   |
| GeneCards | Neutrophil extracellular trap formation | COPS5    |
| GeneCards | Neutrophil extracellular trap formation | ELP3     |
| GeneCards | Neutrophil extracellular trap formation | BTAF1    |
| GeneCards | Neutrophil extracellular trap formation | IL22RA2  |
| GeneCards | Neutrophil extracellular trap formation | RSF1     |
| GeneCards | Neutrophil extracellular trap formation | GSTA1    |
| GeneCards | Neutrophil extracellular trap formation | UBXN1    |
| GeneCards | Neutrophil extracellular trap formation | RETSAT   |
| GeneCards | Neutrophil extracellular trap formation | HSD17B1  |
| GeneCards | Neutrophil extracellular trap formation | USP3     |
| GeneCards | Neutrophil extracellular trap formation | SLC25A25 |
| GeneCards | Neutrophil extracellular trap formation | KCNA5    |
| GeneCards | Neutrophil extracellular trap formation | CBLN2    |
| GeneCards | Neutrophil extracellular trap formation | PLIN1    |
| GeneCards | Neutrophil extracellular trap formation | EIF2B3   |

|           |                                         |         |
|-----------|-----------------------------------------|---------|
| GeneCards | Neutrophil extracellular trap formation | FOXN4   |
| GeneCards | Neutrophil extracellular trap formation | RANBP10 |
| GeneCards | Neutrophil extracellular trap formation | GMPS    |
| GeneCards | Neutrophil extracellular trap formation | PCGF1   |
| GeneCards | Neutrophil extracellular trap formation | XPOT    |
| GeneCards | Neutrophil extracellular trap formation | CEP290  |
| GeneCards | Neutrophil extracellular trap formation | PTBP3   |
| GeneCards | Neutrophil extracellular trap formation | PPP4R1  |
| GeneCards | Neutrophil extracellular trap formation | NFXL1   |
| GeneCards | Neutrophil extracellular trap formation | TANC1   |
| GeneCards | Neutrophil extracellular trap formation | ATP5MF  |
| GeneCards | Neutrophil extracellular trap formation | CYP2C9  |
| GeneCards | Neutrophil extracellular trap formation | SEC22B  |
| GeneCards | Neutrophil extracellular trap formation | KDM2A   |
| GeneCards | Neutrophil extracellular trap formation | ZKSCAN8 |
| GeneCards | Neutrophil extracellular trap formation | ADAM30  |
| GeneCards | Neutrophil extracellular trap formation | AQP11   |
| GeneCards | Neutrophil extracellular trap formation | MIR26A2 |
| GeneCards | Neutrophil extracellular trap formation | CDC7    |
| GeneCards | Neutrophil extracellular trap formation | H3-4    |
| GeneCards | Neutrophil extracellular trap formation | RAE1    |
| GeneCards | Neutrophil extracellular trap formation | ABHD6   |



|           |                                         |          |
|-----------|-----------------------------------------|----------|
| GeneCards | Neutrophil extracellular trap formation | PDSS2    |
| GeneCards | Neutrophil extracellular trap formation | HACD3    |
| GeneCards | Neutrophil extracellular trap formation | SEPHS1   |
| GeneCards | Neutrophil extracellular trap formation | EIF4A2   |
| GeneCards | Neutrophil extracellular trap formation | CBLL1    |
| GeneCards | Neutrophil extracellular trap formation | FBXO5    |
| GeneCards | Neutrophil extracellular trap formation | DYNC1I2  |
| GeneCards | Neutrophil extracellular trap formation | TRIM24   |
| GeneCards | Neutrophil extracellular trap formation | PRKAR2B  |
| GeneCards | Neutrophil extracellular trap formation | GABRE    |
| GeneCards | Neutrophil extracellular trap formation | FGF21    |
| GeneCards | Neutrophil extracellular trap formation | COPB2    |
| GeneCards | Neutrophil extracellular trap formation | PCLAF    |
| GeneCards | Neutrophil extracellular trap formation | SNW1     |
| GeneCards | Neutrophil extracellular trap formation | WFDC12   |
| GeneCards | Neutrophil extracellular trap formation | TMEM50B  |
| GeneCards | Neutrophil extracellular trap formation | NAP1L1   |
| GeneCards | Neutrophil extracellular trap formation | CYB561A3 |
| GeneCards | Neutrophil extracellular trap formation | CRHBP    |
| GeneCards | Neutrophil extracellular trap formation | WDR18    |
| GeneCards | Neutrophil extracellular trap formation | RHAG     |
| GeneCards | Neutrophil extracellular trap formation | FAM20B   |

|           |                                         |          |
|-----------|-----------------------------------------|----------|
| GeneCards | Neutrophil extracellular trap formation | ZNF707   |
| GeneCards | Neutrophil extracellular trap formation | CYB5R4   |
| GeneCards | Neutrophil extracellular trap formation | CIZ1     |
| GeneCards | Neutrophil extracellular trap formation | TOR1AIP1 |
| GeneCards | Neutrophil extracellular trap formation | ACSL5    |
| GeneCards | Neutrophil extracellular trap formation | SEC24A   |
| GeneCards | Neutrophil extracellular trap formation | ZNF574   |
| GeneCards | Neutrophil extracellular trap formation | MUCL1    |
| GeneCards | Neutrophil extracellular trap formation | RAD54B   |
| GeneCards | Neutrophil extracellular trap formation | TRIM13   |
| GeneCards | Neutrophil extracellular trap formation | WDR77    |
| GeneCards | Neutrophil extracellular trap formation | LHX1     |
| GeneCards | Neutrophil extracellular trap formation | LAGE3    |
| GeneCards | Neutrophil extracellular trap formation | COPS2    |
| GeneCards | Neutrophil extracellular trap formation | ZNF142   |
| GeneCards | Neutrophil extracellular trap formation | DMAC2    |
| GeneCards | Neutrophil extracellular trap formation | TNPO3    |
| GeneCards | Neutrophil extracellular trap formation | CIDEC    |
| GeneCards | Neutrophil extracellular trap formation | FCRL2    |
| GeneCards | Neutrophil extracellular trap formation | GPN3     |
| GeneCards | Neutrophil extracellular trap formation | HBA1     |
| GeneCards | Neutrophil extracellular trap formation | TUBGCP3  |

|           |                                         |         |
|-----------|-----------------------------------------|---------|
| GeneCards | Neutrophil extracellular trap formation | CGB3    |
| GeneCards | Neutrophil extracellular trap formation | DYNC2I1 |
| GeneCards | Neutrophil extracellular trap formation | CISD1   |
| GeneCards | Neutrophil extracellular trap formation | GCH1    |
| GeneCards | Neutrophil extracellular trap formation | ATAD3A  |
| GeneCards | Neutrophil extracellular trap formation | NDUFS3  |
| GeneCards | Neutrophil extracellular trap formation | APOL6   |
| GeneCards | Neutrophil extracellular trap formation | KARS1   |
| GeneCards | Neutrophil extracellular trap formation | PDZD7   |
| GeneCards | Neutrophil extracellular trap formation | DPEP3   |
| GeneCards | Neutrophil extracellular trap formation | SLC40A1 |
| GeneCards | Neutrophil extracellular trap formation | PEX6    |
| GeneCards | Neutrophil extracellular trap formation | COLEC11 |
| GeneCards | Neutrophil extracellular trap formation | TSPAN17 |
| GeneCards | Neutrophil extracellular trap formation | FZD9    |
| GeneCards | Neutrophil extracellular trap formation | ERG28   |
| GeneCards | Neutrophil extracellular trap formation | DERL1   |
| GeneCards | Neutrophil extracellular trap formation | CACNG5  |
| GeneCards | Neutrophil extracellular trap formation | PJA2    |
| GeneCards | Neutrophil extracellular trap formation | BAG1    |
| GeneCards | Neutrophil extracellular trap formation | MORC2   |
| GeneCards | Neutrophil extracellular trap formation | H2AX    |

|           |                                         |         |
|-----------|-----------------------------------------|---------|
| GeneCards | Neutrophil extracellular trap formation | ZFPM2   |
| GeneCards | Neutrophil extracellular trap formation | CASZ1   |
| GeneCards | Neutrophil extracellular trap formation | MFF     |
| GeneCards | Neutrophil extracellular trap formation | ANKLE2  |
| GeneCards | Neutrophil extracellular trap formation | ZNF22   |
| GeneCards | Neutrophil extracellular trap formation | TMCC2   |
| GeneCards | Neutrophil extracellular trap formation | BCL11B  |
| GeneCards | Neutrophil extracellular trap formation | MATR3   |
| GeneCards | Neutrophil extracellular trap formation | GPN1    |
| GeneCards | Neutrophil extracellular trap formation | CUL3    |
| GeneCards | Neutrophil extracellular trap formation | EYA4    |
| GeneCards | Neutrophil extracellular trap formation | RAD54L2 |
| GeneCards | Neutrophil extracellular trap formation | CSMD1   |
| GeneCards | Neutrophil extracellular trap formation | LGI1    |
| GeneCards | Neutrophil extracellular trap formation | RPL10   |
| GeneCards | Neutrophil extracellular trap formation | TTC13   |
| GeneCards | Neutrophil extracellular trap formation | MARCHF8 |
| GeneCards | Neutrophil extracellular trap formation | NR2E1   |
| GeneCards | Neutrophil extracellular trap formation | RPL30   |
| GeneCards | Neutrophil extracellular trap formation | GTF3C6  |
| GeneCards | Neutrophil extracellular trap formation | SUMO2   |
| GeneCards | Neutrophil extracellular trap formation | STIMATE |

|           |                                         |         |
|-----------|-----------------------------------------|---------|
| GeneCards | Neutrophil extracellular trap formation | ZNF507  |
| GeneCards | Neutrophil extracellular trap formation | RPS8    |
| GeneCards | Neutrophil extracellular trap formation | ZNF691  |
| GeneCards | Neutrophil extracellular trap formation | AGGF1   |
| GeneCards | Neutrophil extracellular trap formation | PDHB    |
| GeneCards | Neutrophil extracellular trap formation | CDC45   |
| GeneCards | Neutrophil extracellular trap formation | UBE2J2  |
| GeneCards | Neutrophil extracellular trap formation | NIN     |
| GeneCards | Neutrophil extracellular trap formation | TIMM10  |
| GeneCards | Neutrophil extracellular trap formation | UTP18   |
| GeneCards | Neutrophil extracellular trap formation | ABCD1   |
| GeneCards | Neutrophil extracellular trap formation | PRPF40B |
| GeneCards | Neutrophil extracellular trap formation | EIF3L   |
| GeneCards | Neutrophil extracellular trap formation | BBS1    |
| GeneCards | Neutrophil extracellular trap formation | ATRN    |
| GeneCards | Neutrophil extracellular trap formation | THOP1   |
| GeneCards | Neutrophil extracellular trap formation | LHX4    |
| GeneCards | Neutrophil extracellular trap formation | TM9SF3  |
| GeneCards | Neutrophil extracellular trap formation | CDAN1   |
| GeneCards | Neutrophil extracellular trap formation | GPATCH8 |
| GeneCards | Neutrophil extracellular trap formation | VPS35   |
| GeneCards | Neutrophil extracellular trap formation | SLC10A3 |

|           |                                         |         |
|-----------|-----------------------------------------|---------|
| GeneCards | Neutrophil extracellular trap formation | PFDN1   |
| GeneCards | Neutrophil extracellular trap formation | GLT8D1  |
| GeneCards | Neutrophil extracellular trap formation | DDX6    |
| GeneCards | Neutrophil extracellular trap formation | RUSC2   |
| GeneCards | Neutrophil extracellular trap formation | KCTD5   |
| GeneCards | Neutrophil extracellular trap formation | PPM1G   |
| GeneCards | Neutrophil extracellular trap formation | PDS5B   |
| GeneCards | Neutrophil extracellular trap formation | GRAMD1B |
| GeneCards | Neutrophil extracellular trap formation | SPAST   |
| GeneCards | Neutrophil extracellular trap formation | EPS8L1  |
| GeneCards | Neutrophil extracellular trap formation | DIS3    |
| GeneCards | Neutrophil extracellular trap formation | WDR82   |
| GeneCards | Neutrophil extracellular trap formation | NDEL1   |
| GeneCards | Neutrophil extracellular trap formation | SNUPN   |
| GeneCards | Neutrophil extracellular trap formation | PRTG    |
| GeneCards | Neutrophil extracellular trap formation | VPS26A  |
| GeneCards | Neutrophil extracellular trap formation | RPS5    |
| GeneCards | Neutrophil extracellular trap formation | ALDH1L1 |
| GeneCards | Neutrophil extracellular trap formation | NUB1    |
| GeneCards | Neutrophil extracellular trap formation | BTBD8   |
| GeneCards | Neutrophil extracellular trap formation | NOL9    |
| GeneCards | Neutrophil extracellular trap formation | ANKZF1  |

|           |                                         |          |
|-----------|-----------------------------------------|----------|
| GeneCards | Neutrophil extracellular trap formation | AK5      |
| GeneCards | Neutrophil extracellular trap formation | DDX42    |
| GeneCards | Neutrophil extracellular trap formation | PHF8     |
| GeneCards | Neutrophil extracellular trap formation | DGAT2    |
| GeneCards | Neutrophil extracellular trap formation | INTS2    |
| GeneCards | Neutrophil extracellular trap formation | TMEM14EP |
| GeneCards | Neutrophil extracellular trap formation | PLA2G12A |
| GeneCards | Neutrophil extracellular trap formation | CHP1     |
| GeneCards | Neutrophil extracellular trap formation | FGF19    |
| GeneCards | Neutrophil extracellular trap formation | RPL7A    |
| GeneCards | Neutrophil extracellular trap formation | ZFPM1    |
| GeneCards | Neutrophil extracellular trap formation | ZNF385A  |
| GeneCards | Neutrophil extracellular trap formation | MLLT3    |
| GeneCards | Neutrophil extracellular trap formation | CEP85L   |
| GeneCards | Neutrophil extracellular trap formation | CEBPZ    |
| GeneCards | Neutrophil extracellular trap formation | FAM117B  |
| GeneCards | Neutrophil extracellular trap formation | C1orf109 |
| GeneCards | Neutrophil extracellular trap formation | QPCTL    |
| GeneCards | Neutrophil extracellular trap formation | FAM193B  |
| GeneCards | Neutrophil extracellular trap formation | TRAM1L1  |
| GeneCards | Neutrophil extracellular trap formation | IP6K2    |
| GeneCards | Neutrophil extracellular trap formation | CNOT10   |

|           |                                         |          |
|-----------|-----------------------------------------|----------|
| GeneCards | Neutrophil extracellular trap formation | TMEM38B  |
| GeneCards | Neutrophil extracellular trap formation | HAT1     |
| GeneCards | Neutrophil extracellular trap formation | ALG9     |
| GeneCards | Neutrophil extracellular trap formation | ARHGAP21 |
| GeneCards | Neutrophil extracellular trap formation | MTCH1    |
| GeneCards | Neutrophil extracellular trap formation | KLLN     |
| GeneCards | Neutrophil extracellular trap formation | IGHMBP2  |
| GeneCards | Neutrophil extracellular trap formation | UBE2E1   |
| GeneCards | Neutrophil extracellular trap formation | WDR59    |
| GeneCards | Neutrophil extracellular trap formation | LCN6     |
| GeneCards | Neutrophil extracellular trap formation | USF2     |
| GeneCards | Neutrophil extracellular trap formation | FOXA1    |
| GeneCards | Neutrophil extracellular trap formation | STEAP3   |
| GeneCards | Neutrophil extracellular trap formation | KCNMB4   |
| GeneCards | Neutrophil extracellular trap formation | GOLGA2   |
| GeneCards | Neutrophil extracellular trap formation | SEZ6L2   |
| GeneCards | Neutrophil extracellular trap formation | GTF3C1   |
| GeneCards | Neutrophil extracellular trap formation | ZNF420   |
| GeneCards | Neutrophil extracellular trap formation | ZNF155   |
| GeneCards | Neutrophil extracellular trap formation | BAP1     |
| GeneCards | Neutrophil extracellular trap formation | SRPRB    |
| GeneCards | Neutrophil extracellular trap formation | EED      |



|           |                                         |           |
|-----------|-----------------------------------------|-----------|
| GeneCards | Neutrophil extracellular trap formation | PCBP3     |
| GeneCards | Neutrophil extracellular trap formation | NOB1      |
| GeneCards | Neutrophil extracellular trap formation | TPST2     |
| GeneCards | Neutrophil extracellular trap formation | C12orf57  |
| GeneCards | Neutrophil extracellular trap formation | MNT       |
| GeneCards | Neutrophil extracellular trap formation | ZNF569    |
| GeneCards | Neutrophil extracellular trap formation | TBX21     |
| GeneCards | Neutrophil extracellular trap formation | TMX3      |
| GeneCards | Neutrophil extracellular trap formation | TUBB2B    |
| GeneCards | Neutrophil extracellular trap formation | TMED9     |
| GeneCards | Neutrophil extracellular trap formation | LMBR1L    |
| GeneCards | Neutrophil extracellular trap formation | CORO1B    |
| GeneCards | Neutrophil extracellular trap formation | TAF12     |
| GeneCards | Neutrophil extracellular trap formation | EIF3E     |
| GeneCards | Neutrophil extracellular trap formation | BMP8A     |
| GeneCards | Neutrophil extracellular trap formation | FAM174A   |
| GeneCards | Neutrophil extracellular trap formation | PDE12     |
| GeneCards | Neutrophil extracellular trap formation | STRN      |
| GeneCards | Neutrophil extracellular trap formation | TBC1D23   |
| GeneCards | Neutrophil extracellular trap formation | LINC02910 |
| GeneCards | Neutrophil extracellular trap formation | LMLN      |
| GeneCards | Neutrophil extracellular trap formation | DGLUCY    |

|           |                                         |         |
|-----------|-----------------------------------------|---------|
| GeneCards | Neutrophil extracellular trap formation | SRPK1   |
| GeneCards | Neutrophil extracellular trap formation | RAI1    |
| GeneCards | Neutrophil extracellular trap formation | MYL1    |
| GeneCards | Neutrophil extracellular trap formation | HSD17B4 |
| GeneCards | Neutrophil extracellular trap formation | MGAT3   |
| GeneCards | Neutrophil extracellular trap formation | AOPEP   |
| GeneCards | Neutrophil extracellular trap formation | MLLT1   |
| GeneCards | Neutrophil extracellular trap formation | NXPE4   |
| GeneCards | Neutrophil extracellular trap formation | PURA    |
| GeneCards | Neutrophil extracellular trap formation | SUMO1   |
| GeneCards | Neutrophil extracellular trap formation | PHF7    |
| GeneCards | Neutrophil extracellular trap formation | TRABD   |
| GeneCards | Neutrophil extracellular trap formation | ZNF326  |
| GeneCards | Neutrophil extracellular trap formation | ENKD1   |
| GeneCards | Neutrophil extracellular trap formation | TSPAN6  |
| GeneCards | Neutrophil extracellular trap formation | ITIH6   |
| GeneCards | Neutrophil extracellular trap formation | RMI1    |
| GeneCards | Neutrophil extracellular trap formation | BHMT    |
| GeneCards | Neutrophil extracellular trap formation | LYPD2   |
| GeneCards | Neutrophil extracellular trap formation | MSRB3   |
| GeneCards | Neutrophil extracellular trap formation | SELENOT |
| GeneCards | Neutrophil extracellular trap formation | ERLIN1  |

|           |                                         |        |
|-----------|-----------------------------------------|--------|
| GeneCards | Neutrophil extracellular trap formation | PPP2CB |
| GeneCards | Neutrophil extracellular trap formation | TMEM9  |
| GeneCards | Neutrophil extracellular trap formation | RCSD1  |
| GeneCards | Neutrophil extracellular trap formation | EMX2   |
| GeneCards | Neutrophil extracellular trap formation | PPIL3  |
| GeneCards | Neutrophil extracellular trap formation | CTR9   |
| GeneCards | Neutrophil extracellular trap formation | CMKLR1 |
| GeneCards | Neutrophil extracellular trap formation | RBP7   |
| GeneCards | Neutrophil extracellular trap formation | MAT2B  |
| GeneCards | Neutrophil extracellular trap formation | VBP1   |
| GeneCards | Neutrophil extracellular trap formation | CHD8   |
| GeneCards | Neutrophil extracellular trap formation | NOC4L  |
| GeneCards | Neutrophil extracellular trap formation | SUCLA2 |
| GeneCards | Neutrophil extracellular trap formation | PIR    |
| GeneCards | Neutrophil extracellular trap formation | CNOT2  |
| GeneCards | Neutrophil extracellular trap formation | RPL27A |
| GeneCards | Neutrophil extracellular trap formation | LGI3   |
| GeneCards | Neutrophil extracellular trap formation | MTFR1  |
| GeneCards | Neutrophil extracellular trap formation | ENHO   |
| GeneCards | Neutrophil extracellular trap formation | POLR2F |
| GeneCards | Neutrophil extracellular trap formation | CELSR2 |
| GeneCards | Neutrophil extracellular trap formation | PDS5A  |

|           |                                         |              |
|-----------|-----------------------------------------|--------------|
| GeneCards | Neutrophil extracellular trap formation | HOXB9        |
| GeneCards | Neutrophil extracellular trap formation | PASK         |
| GeneCards | Neutrophil extracellular trap formation | TSPAN15      |
| GeneCards | Neutrophil extracellular trap formation | AKAP1        |
| GeneCards | Neutrophil extracellular trap formation | C4orf46      |
| GeneCards | Neutrophil extracellular trap formation | FXYD1        |
| GeneCards | Neutrophil extracellular trap formation | MYBBP1A      |
| GeneCards | Neutrophil extracellular trap formation | SC5D         |
| GeneCards | Neutrophil extracellular trap formation | PSMD8        |
| GeneCards | Neutrophil extracellular trap formation | RPL37        |
| GeneCards | Neutrophil extracellular trap formation | ZDHHC13      |
| GeneCards | Neutrophil extracellular trap formation | STAT2        |
| GeneCards | Neutrophil extracellular trap formation | REG3G        |
| GeneCards | Neutrophil extracellular trap formation | SLC22A12     |
| GeneCards | Neutrophil extracellular trap formation | C21orf62-AS1 |
| GeneCards | Neutrophil extracellular trap formation | THUMPD3      |
| GeneCards | Neutrophil extracellular trap formation | PCDHGA12     |
| GeneCards | Neutrophil extracellular trap formation | CLEC4G       |
| GeneCards | Neutrophil extracellular trap formation | NKX6-2       |
| GeneCards | Neutrophil extracellular trap formation | NIPA1        |
| GeneCards | Neutrophil extracellular trap formation | HIP1         |
| GeneCards | Neutrophil extracellular trap formation | TSN          |

|           |                                         |          |
|-----------|-----------------------------------------|----------|
| GeneCards | Neutrophil extracellular trap formation | PPP1R35  |
| GeneCards | Neutrophil extracellular trap formation | SFXN1    |
| GeneCards | Neutrophil extracellular trap formation | ARID3B   |
| GeneCards | Neutrophil extracellular trap formation | PRRT2    |
| GeneCards | Neutrophil extracellular trap formation | NPLOC4   |
| GeneCards | Neutrophil extracellular trap formation | LDAF1    |
| GeneCards | Neutrophil extracellular trap formation | HAUS4    |
| GeneCards | Neutrophil extracellular trap formation | TRMT1L   |
| GeneCards | Neutrophil extracellular trap formation | KLRA1P   |
| GeneCards | Neutrophil extracellular trap formation | CRLF1    |
| GeneCards | Neutrophil extracellular trap formation | NOP58    |
| GeneCards | Neutrophil extracellular trap formation | DLL3     |
| GeneCards | Neutrophil extracellular trap formation | ATP1A3   |
| GeneCards | Neutrophil extracellular trap formation | FXYD6    |
| GeneCards | Neutrophil extracellular trap formation | SLC34A2  |
| GeneCards | Neutrophil extracellular trap formation | CYP20A1  |
| GeneCards | Neutrophil extracellular trap formation | ARHGAP39 |
| GeneCards | Neutrophil extracellular trap formation | METTL21A |
| GeneCards | Neutrophil extracellular trap formation | YIPF2    |
| GeneCards | Neutrophil extracellular trap formation | VPS36    |
| GeneCards | Neutrophil extracellular trap formation | HEATR1   |
| GeneCards | Neutrophil extracellular trap formation | CACNA2D1 |

|           |                                         |         |
|-----------|-----------------------------------------|---------|
| GeneCards | Neutrophil extracellular trap formation | SSBP1   |
| GeneCards | Neutrophil extracellular trap formation | COQ9    |
| GeneCards | Neutrophil extracellular trap formation | REEP5   |
| GeneCards | Neutrophil extracellular trap formation | NT5C2   |
| GeneCards | Neutrophil extracellular trap formation | UBE3C   |
| GeneCards | Neutrophil extracellular trap formation | MFSD13A |
| GeneCards | Neutrophil extracellular trap formation | CDS1    |
| GeneCards | Neutrophil extracellular trap formation | RNF213  |
| GeneCards | Neutrophil extracellular trap formation | HACE1   |
| GeneCards | Neutrophil extracellular trap formation | VPS53   |
| GeneCards | Neutrophil extracellular trap formation | TMIGD2  |
| GeneCards | Neutrophil extracellular trap formation | DHX8    |
| GeneCards | Neutrophil extracellular trap formation | AHDC1   |
| GeneCards | Neutrophil extracellular trap formation | H3C12   |
| GeneCards | Neutrophil extracellular trap formation | GOSR2   |
| GeneCards | Neutrophil extracellular trap formation | MLEC    |
| GeneCards | Neutrophil extracellular trap formation | PSIP1   |
| GeneCards | Neutrophil extracellular trap formation | SEMA3D  |
| GeneCards | Neutrophil extracellular trap formation | UGP2    |
| GeneCards | Neutrophil extracellular trap formation | PSMA7   |
| GeneCards | Neutrophil extracellular trap formation | NUBP1   |
| GeneCards | Neutrophil extracellular trap formation | ECI2    |

|           |                                         |          |
|-----------|-----------------------------------------|----------|
| GeneCards | Neutrophil extracellular trap formation | RPL37A   |
| GeneCards | Neutrophil extracellular trap formation | POU3F2   |
| GeneCards | Neutrophil extracellular trap formation | KYNU     |
| GeneCards | Neutrophil extracellular trap formation | MTRES1   |
| GeneCards | Neutrophil extracellular trap formation | NXPH4    |
| GeneCards | Neutrophil extracellular trap formation | ASS1     |
| GeneCards | Neutrophil extracellular trap formation | DOK1     |
| GeneCards | Neutrophil extracellular trap formation | SLC16A10 |
| GeneCards | Neutrophil extracellular trap formation | CLIC2    |
| GeneCards | Neutrophil extracellular trap formation | MIB1     |
| GeneCards | Neutrophil extracellular trap formation | INTS6    |
| GeneCards | Neutrophil extracellular trap formation | LLGL1    |
| GeneCards | Neutrophil extracellular trap formation | MEGF11   |
| GeneCards | Neutrophil extracellular trap formation | ESYT2    |
| GeneCards | Neutrophil extracellular trap formation | INCENP   |
| GeneCards | Neutrophil extracellular trap formation | SCFD1    |
| GeneCards | Neutrophil extracellular trap formation | PRDM11   |
| GeneCards | Neutrophil extracellular trap formation | FXYD7    |
| GeneCards | Neutrophil extracellular trap formation | CD72     |
| GeneCards | Neutrophil extracellular trap formation | PRR14L   |
| GeneCards | Neutrophil extracellular trap formation | G3BP2    |
| GeneCards | Neutrophil extracellular trap formation | ZNF644   |

|           |                                         |           |
|-----------|-----------------------------------------|-----------|
| GeneCards | Neutrophil extracellular trap formation | KIAA0319L |
| GeneCards | Neutrophil extracellular trap formation | ZNF417    |
| GeneCards | Neutrophil extracellular trap formation | ACSBG2    |
| GeneCards | Neutrophil extracellular trap formation | INKA2     |
| GeneCards | Neutrophil extracellular trap formation | NHSL1     |
| GeneCards | Neutrophil extracellular trap formation | TM4SF20   |
| GeneCards | Neutrophil extracellular trap formation | MARVELD2  |
| GeneCards | Neutrophil extracellular trap formation | PSCA      |
| GeneCards | Neutrophil extracellular trap formation | RPL34     |
| GeneCards | Neutrophil extracellular trap formation | CHST4     |
| GeneCards | Neutrophil extracellular trap formation | SEC24C    |
| GeneCards | Neutrophil extracellular trap formation | ALDH5A1   |
| GeneCards | Neutrophil extracellular trap formation | CAMSAP2   |
| GeneCards | Neutrophil extracellular trap formation | TMCO1     |
| GeneCards | Neutrophil extracellular trap formation | EEF1AKMT3 |
| GeneCards | Neutrophil extracellular trap formation | SLC30A9   |
| GeneCards | Neutrophil extracellular trap formation | PGAM5     |
| GeneCards | Neutrophil extracellular trap formation | SEC63     |
| GeneCards | Neutrophil extracellular trap formation | TMEM182   |
| GeneCards | Neutrophil extracellular trap formation | LITAF     |
| GeneCards | Neutrophil extracellular trap formation | YIPF5     |
| GeneCards | Neutrophil extracellular trap formation | FUBP1     |



|           |                                         |          |
|-----------|-----------------------------------------|----------|
| GeneCards | Neutrophil extracellular trap formation | MC2R     |
| GeneCards | Neutrophil extracellular trap formation | SLC9C1   |
| GeneCards | Neutrophil extracellular trap formation | CLEC4C   |
| GeneCards | Neutrophil extracellular trap formation | MRPS7    |
| GeneCards | Neutrophil extracellular trap formation | TIMM21   |
| GeneCards | Neutrophil extracellular trap formation | ERP29    |
| GeneCards | Neutrophil extracellular trap formation | UBXN2B   |
| GeneCards | Neutrophil extracellular trap formation | MIR9-1HG |
| GeneCards | Neutrophil extracellular trap formation | ADAL     |
| GeneCards | Neutrophil extracellular trap formation | ZNF740   |
| GeneCards | Neutrophil extracellular trap formation | AP2M1    |
| GeneCards | Neutrophil extracellular trap formation | MYRF     |
| GeneCards | Neutrophil extracellular trap formation | SNRPB    |
| GeneCards | Neutrophil extracellular trap formation | RIOK2    |
| GeneCards | Neutrophil extracellular trap formation | SNAPIN   |
| GeneCards | Neutrophil extracellular trap formation | CCAR2    |
| GeneCards | Neutrophil extracellular trap formation | NDUFS8   |
| GeneCards | Neutrophil extracellular trap formation | ANKRD44  |
| GeneCards | Neutrophil extracellular trap formation | PPP2R1B  |
| GeneCards | Neutrophil extracellular trap formation | COLEC10  |
| GeneCards | Neutrophil extracellular trap formation | SCOC     |
| GeneCards | Neutrophil extracellular trap formation | FOXK2    |

|           |                                         |          |
|-----------|-----------------------------------------|----------|
| GeneCards | Neutrophil extracellular trap formation | GOPC     |
| GeneCards | Neutrophil extracellular trap formation | GDF3     |
| GeneCards | Neutrophil extracellular trap formation | TOPORS   |
| GeneCards | Neutrophil extracellular trap formation | CCDC6    |
| GeneCards | Neutrophil extracellular trap formation | CCDC126  |
| GeneCards | Neutrophil extracellular trap formation | GCN1     |
| GeneCards | Neutrophil extracellular trap formation | POLR2H   |
| GeneCards | Neutrophil extracellular trap formation | DCLRE1B  |
| GeneCards | Neutrophil extracellular trap formation | SMC2     |
| GeneCards | Neutrophil extracellular trap formation | AARSD1   |
| GeneCards | Neutrophil extracellular trap formation | SH3BP5L  |
| GeneCards | Neutrophil extracellular trap formation | GPX8     |
| GeneCards | Neutrophil extracellular trap formation | NKTR     |
| GeneCards | Neutrophil extracellular trap formation | C2orf16  |
| GeneCards | Neutrophil extracellular trap formation | MRAP     |
| GeneCards | Neutrophil extracellular trap formation | GAREM2   |
| GeneCards | Neutrophil extracellular trap formation | APOBEC3C |
| GeneCards | Neutrophil extracellular trap formation | MR1      |
| GeneCards | Neutrophil extracellular trap formation | SPESP1   |
| GeneCards | Neutrophil extracellular trap formation | TMEM214  |
| GeneCards | Neutrophil extracellular trap formation | AGPAT4   |
| GeneCards | Neutrophil extracellular trap formation | MTMR1    |

|           |                                         |          |
|-----------|-----------------------------------------|----------|
| GeneCards | Neutrophil extracellular trap formation | HOGA1    |
| GeneCards | Neutrophil extracellular trap formation | FOXA2    |
| GeneCards | Neutrophil extracellular trap formation | CLCNKB   |
| GeneCards | Neutrophil extracellular trap formation | TICAM2   |
| GeneCards | Neutrophil extracellular trap formation | FKBP9    |
| GeneCards | Neutrophil extracellular trap formation | IDH3G    |
| GeneCards | Neutrophil extracellular trap formation | CLHC1    |
| GeneCards | Neutrophil extracellular trap formation | ATP13A1  |
| GeneCards | Neutrophil extracellular trap formation | PPP1CC   |
| GeneCards | Neutrophil extracellular trap formation | SNX24    |
| GeneCards | Neutrophil extracellular trap formation | SLC30A5  |
| GeneCards | Neutrophil extracellular trap formation | CACNA1H  |
| GeneCards | Neutrophil extracellular trap formation | PON2     |
| GeneCards | Neutrophil extracellular trap formation | TMED4    |
| GeneCards | Neutrophil extracellular trap formation | HSD17B13 |
| GeneCards | Neutrophil extracellular trap formation | H2BC4    |
| GeneCards | Neutrophil extracellular trap formation | TSPAN13  |
| GeneCards | Neutrophil extracellular trap formation | RENBP    |
| GeneCards | Neutrophil extracellular trap formation | LSM11    |
| GeneCards | Neutrophil extracellular trap formation | WDR75    |
| GeneCards | Neutrophil extracellular trap formation | EDC4     |
| GeneCards | Neutrophil extracellular trap formation | METTL14  |

|           |                                         |           |
|-----------|-----------------------------------------|-----------|
| GeneCards | Neutrophil extracellular trap formation | OSBPL7    |
| GeneCards | Neutrophil extracellular trap formation | IREB2     |
| GeneCards | Neutrophil extracellular trap formation | CELF1     |
| GeneCards | Neutrophil extracellular trap formation | KIF2A     |
| GeneCards | Neutrophil extracellular trap formation | ZFYVE19   |
| GeneCards | Neutrophil extracellular trap formation | ZNF184    |
| GeneCards | Neutrophil extracellular trap formation | RPL24     |
| GeneCards | Neutrophil extracellular trap formation | ZKSCAN1   |
| GeneCards | Neutrophil extracellular trap formation | NDC80     |
| GeneCards | Neutrophil extracellular trap formation | GLDC      |
| GeneCards | Neutrophil extracellular trap formation | CCDC88A   |
| GeneCards | Neutrophil extracellular trap formation | LEPROTL1  |
| GeneCards | Neutrophil extracellular trap formation | PNO1      |
| GeneCards | Neutrophil extracellular trap formation | POLA1     |
| GeneCards | Neutrophil extracellular trap formation | TCTN1     |
| GeneCards | Neutrophil extracellular trap formation | MAP7D3    |
| GeneCards | Neutrophil extracellular trap formation | CTTNBP2NL |
| GeneCards | Neutrophil extracellular trap formation | JADE3     |
| GeneCards | Neutrophil extracellular trap formation | NT5DC2    |
| GeneCards | Neutrophil extracellular trap formation | BAZ1B     |
| GeneCards | Neutrophil extracellular trap formation | SAR1A     |
| GeneCards | Neutrophil extracellular trap formation | SPART     |

|           |                                         |          |
|-----------|-----------------------------------------|----------|
| GeneCards | Neutrophil extracellular trap formation | AQP7     |
| GeneCards | Neutrophil extracellular trap formation | AMOTL1   |
| GeneCards | Neutrophil extracellular trap formation | RNF138   |
| GeneCards | Neutrophil extracellular trap formation | POGLUT2  |
| GeneCards | Neutrophil extracellular trap formation | PAMR1    |
| GeneCards | Neutrophil extracellular trap formation | SPACA5   |
| GeneCards | Neutrophil extracellular trap formation | DHRS11   |
| GeneCards | Neutrophil extracellular trap formation | SLC39A11 |
| GeneCards | Neutrophil extracellular trap formation | DMTN     |
| GeneCards | Neutrophil extracellular trap formation | CYP27B1  |
| GeneCards | Neutrophil extracellular trap formation | SEPTIN8  |
| GeneCards | Neutrophil extracellular trap formation | DNAJB14  |
| GeneCards | Neutrophil extracellular trap formation | ALDH1A3  |
| GeneCards | Neutrophil extracellular trap formation | APOL2    |
| GeneCards | Neutrophil extracellular trap formation | MLLT11   |
| GeneCards | Neutrophil extracellular trap formation | GAD2     |
| GeneCards | Neutrophil extracellular trap formation | KANK2    |
| GeneCards | Neutrophil extracellular trap formation | ZNF655   |
| GeneCards | Neutrophil extracellular trap formation | ZSCAN12  |
| GeneCards | Neutrophil extracellular trap formation | CLDND1   |
| GeneCards | Neutrophil extracellular trap formation | CCNE2    |
| GeneCards | Neutrophil extracellular trap formation | SYNJ1    |

|           |                                         |          |
|-----------|-----------------------------------------|----------|
| GeneCards | Neutrophil extracellular trap formation | UNC45A   |
| GeneCards | Neutrophil extracellular trap formation | PDF      |
| GeneCards | Neutrophil extracellular trap formation | C1QTNF8  |
| GeneCards | Neutrophil extracellular trap formation | MRPL38   |
| GeneCards | Neutrophil extracellular trap formation | SCARA5   |
| GeneCards | Neutrophil extracellular trap formation | PRSS35   |
| GeneCards | Neutrophil extracellular trap formation | C2orf66  |
| GeneCards | Neutrophil extracellular trap formation | ZNF664   |
| GeneCards | Neutrophil extracellular trap formation | FOXK1    |
| GeneCards | Neutrophil extracellular trap formation | RGS12    |
| GeneCards | Neutrophil extracellular trap formation | ETFA     |
| GeneCards | Neutrophil extracellular trap formation | LCA5L    |
| GeneCards | Neutrophil extracellular trap formation | PIAS3    |
| GeneCards | Neutrophil extracellular trap formation | CDC73    |
| GeneCards | Neutrophil extracellular trap formation | DOCK7    |
| GeneCards | Neutrophil extracellular trap formation | MTSS2    |
| GeneCards | Neutrophil extracellular trap formation | HMBS     |
| GeneCards | Neutrophil extracellular trap formation | GMEB1    |
| GeneCards | Neutrophil extracellular trap formation | STAG3L5P |
| GeneCards | Neutrophil extracellular trap formation | ZBTB21   |
| GeneCards | Neutrophil extracellular trap formation | CHMP2B   |
| GeneCards | Neutrophil extracellular trap formation | HSBP1    |

|           |                                         |         |
|-----------|-----------------------------------------|---------|
| GeneCards | Neutrophil extracellular trap formation | DOK7    |
| GeneCards | Neutrophil extracellular trap formation | CBARP   |
| GeneCards | Neutrophil extracellular trap formation | HYDIN   |
| GeneCards | Neutrophil extracellular trap formation | VIRMA   |
| GeneCards | Neutrophil extracellular trap formation | MNAT1   |
| GeneCards | Neutrophil extracellular trap formation | MRPS35  |
| GeneCards | Neutrophil extracellular trap formation | ATRAID  |
| GeneCards | Neutrophil extracellular trap formation | AKIP1   |
| GeneCards | Neutrophil extracellular trap formation | PYCR3   |
| GeneCards | Neutrophil extracellular trap formation | CEP170B |
| GeneCards | Neutrophil extracellular trap formation | GTF2A2  |
| GeneCards | Neutrophil extracellular trap formation | GJA3    |
| GeneCards | Neutrophil extracellular trap formation | KDM3B   |
| GeneCards | Neutrophil extracellular trap formation | DTL     |
| GeneCards | Neutrophil extracellular trap formation | DCAF7   |
| GeneCards | Neutrophil extracellular trap formation | MARCHF2 |
| GeneCards | Neutrophil extracellular trap formation | DPYSL3  |
| GeneCards | Neutrophil extracellular trap formation | GAREM1  |
| GeneCards | Neutrophil extracellular trap formation | PCDH1   |
| GeneCards | Neutrophil extracellular trap formation | GCKR    |
| GeneCards | Neutrophil extracellular trap formation | YIPF3   |
| GeneCards | Neutrophil extracellular trap formation | CNOT3   |

|           |                                         |          |
|-----------|-----------------------------------------|----------|
| GeneCards | Neutrophil extracellular trap formation | TCF25    |
| GeneCards | Neutrophil extracellular trap formation | SQLE     |
| GeneCards | Neutrophil extracellular trap formation | IARS1    |
| GeneCards | Neutrophil extracellular trap formation | RNF39    |
| GeneCards | Neutrophil extracellular trap formation | MCCC1    |
| GeneCards | Neutrophil extracellular trap formation | CEP170   |
| GeneCards | Neutrophil extracellular trap formation | TBX2     |
| GeneCards | Neutrophil extracellular trap formation | FAM43B   |
| GeneCards | Neutrophil extracellular trap formation | PSME1    |
| GeneCards | Neutrophil extracellular trap formation | TBC1D20  |
| GeneCards | Neutrophil extracellular trap formation | PLEKHB1  |
| GeneCards | Neutrophil extracellular trap formation | ZNF24    |
| GeneCards | Neutrophil extracellular trap formation | NAA10    |
| GeneCards | Neutrophil extracellular trap formation | PPP5C    |
| GeneCards | Neutrophil extracellular trap formation | ALDH3A1  |
| GeneCards | Neutrophil extracellular trap formation | BTN2A2   |
| GeneCards | Neutrophil extracellular trap formation | EXOSC5   |
| GeneCards | Neutrophil extracellular trap formation | ABCB4    |
| GeneCards | Neutrophil extracellular trap formation | CCDC13   |
| GeneCards | Neutrophil extracellular trap formation | NBPF11   |
| GeneCards | Neutrophil extracellular trap formation | CEACAM21 |
| GeneCards | Neutrophil extracellular trap formation | TMX2     |



|           |                                         |         |
|-----------|-----------------------------------------|---------|
| GeneCards | Neutrophil extracellular trap formation | ARMC7   |
| GeneCards | Neutrophil extracellular trap formation | PSMD7   |
| GeneCards | Neutrophil extracellular trap formation | METTL13 |
| GeneCards | Neutrophil extracellular trap formation | SEC22A  |
| GeneCards | Neutrophil extracellular trap formation | COPS6   |
| GeneCards | Neutrophil extracellular trap formation | TMEM163 |
| GeneCards | Neutrophil extracellular trap formation | MIA3    |
| GeneCards | Neutrophil extracellular trap formation | KIF14   |
| GeneCards | Neutrophil extracellular trap formation | DERL2   |
| GeneCards | Neutrophil extracellular trap formation | RDH5    |
| GeneCards | Neutrophil extracellular trap formation | PTPRN2  |
| GeneCards | Neutrophil extracellular trap formation | LDHB    |
| GeneCards | Neutrophil extracellular trap formation | H3C1    |
| GeneCards | Neutrophil extracellular trap formation | RNF216  |
| GeneCards | Neutrophil extracellular trap formation | EXT1    |
| GeneCards | Neutrophil extracellular trap formation | UCHL5   |
| GeneCards | Neutrophil extracellular trap formation | LARP4B  |
| GeneCards | Neutrophil extracellular trap formation | ZNG1A   |
| GeneCards | Neutrophil extracellular trap formation | COA7    |
| GeneCards | Neutrophil extracellular trap formation | PSMB2   |
| GeneCards | Neutrophil extracellular trap formation | FNDC7   |
| GeneCards | Neutrophil extracellular trap formation | DDAH1   |

|           |                                         |          |
|-----------|-----------------------------------------|----------|
| GeneCards | Neutrophil extracellular trap formation | LRRC27   |
| GeneCards | Neutrophil extracellular trap formation | RALGPS2  |
| GeneCards | Neutrophil extracellular trap formation | TNKS1BP1 |
| GeneCards | Neutrophil extracellular trap formation | METTL7A  |
| GeneCards | Neutrophil extracellular trap formation | RBM33    |
| GeneCards | Neutrophil extracellular trap formation | GASK1B   |
| GeneCards | Neutrophil extracellular trap formation | STIL     |
| GeneCards | Neutrophil extracellular trap formation | DTX3L    |
| GeneCards | Neutrophil extracellular trap formation | PEX5     |
| GeneCards | Neutrophil extracellular trap formation | ZNF704   |
| GeneCards | Neutrophil extracellular trap formation | RBM12    |
| GeneCards | Neutrophil extracellular trap formation | PARP2    |
| GeneCards | Neutrophil extracellular trap formation | HEG1     |
| GeneCards | Neutrophil extracellular trap formation | RPS9     |
| GeneCards | Neutrophil extracellular trap formation | COPS7A   |
| GeneCards | Neutrophil extracellular trap formation | ARL17A   |
| GeneCards | Neutrophil extracellular trap formation | AHSA1    |
| GeneCards | Neutrophil extracellular trap formation | SPECC1L  |
| GeneCards | Neutrophil extracellular trap formation | C16orf54 |
| GeneCards | Neutrophil extracellular trap formation | AAK1     |
| GeneCards | Neutrophil extracellular trap formation | RTKN     |
| GeneCards | Neutrophil extracellular trap formation | SLCO4A1  |

|           |                                         |          |
|-----------|-----------------------------------------|----------|
| GeneCards | Neutrophil extracellular trap formation | KLHL24   |
| GeneCards | Neutrophil extracellular trap formation | TRIM2    |
| GeneCards | Neutrophil extracellular trap formation | POLR1B   |
| GeneCards | Neutrophil extracellular trap formation | NUDT3    |
| GeneCards | Neutrophil extracellular trap formation | TMEM132A |
| GeneCards | Neutrophil extracellular trap formation | SANBR    |
| GeneCards | Neutrophil extracellular trap formation | RFC5     |
| GeneCards | Neutrophil extracellular trap formation | VSIG8    |
| GeneCards | Neutrophil extracellular trap formation | MOXD1    |
| GeneCards | Neutrophil extracellular trap formation | NLK      |
| GeneCards | Neutrophil extracellular trap formation | CHMP6    |
| GeneCards | Neutrophil extracellular trap formation | GALC     |
| GeneCards | Neutrophil extracellular trap formation | LMX1A    |
| GeneCards | Neutrophil extracellular trap formation | NECTIN3  |
| GeneCards | Neutrophil extracellular trap formation | PSMF1    |
| GeneCards | Neutrophil extracellular trap formation | MYBL2    |
| GeneCards | Neutrophil extracellular trap formation | HNRNPH3  |
| GeneCards | Neutrophil extracellular trap formation | ESAM     |
| GeneCards | Neutrophil extracellular trap formation | CHODL    |
| GeneCards | Neutrophil extracellular trap formation | TUBGCP4  |
| GeneCards | Neutrophil extracellular trap formation | FNBP1    |
| GeneCards | Neutrophil extracellular trap formation | EEFSEC   |

|           |                                         |          |
|-----------|-----------------------------------------|----------|
| GeneCards | Neutrophil extracellular trap formation | ZFYVE26  |
| GeneCards | Neutrophil extracellular trap formation | VPS25    |
| GeneCards | Neutrophil extracellular trap formation | NAT1     |
| GeneCards | Neutrophil extracellular trap formation | LENG8    |
| GeneCards | Neutrophil extracellular trap formation | ATP5PB   |
| GeneCards | Neutrophil extracellular trap formation | TMSB10   |
| GeneCards | Neutrophil extracellular trap formation | KLHL26   |
| GeneCards | Neutrophil extracellular trap formation | FAN1     |
| GeneCards | Neutrophil extracellular trap formation | SNHG15   |
| GeneCards | Neutrophil extracellular trap formation | ZFP62    |
| GeneCards | Neutrophil extracellular trap formation | CCT6B    |
| GeneCards | Neutrophil extracellular trap formation | PMVK     |
| GeneCards | Neutrophil extracellular trap formation | FAM171A2 |
| GeneCards | Neutrophil extracellular trap formation | DHX36    |
| GeneCards | Neutrophil extracellular trap formation | POT1     |
| GeneCards | Neutrophil extracellular trap formation | USP25    |
| GeneCards | Neutrophil extracellular trap formation | UBE2V2   |
| GeneCards | Neutrophil extracellular trap formation | YME1L1   |
| GeneCards | Neutrophil extracellular trap formation | PYY      |
| GeneCards | Neutrophil extracellular trap formation | ALDH7A1  |
| GeneCards | Neutrophil extracellular trap formation | SMC4     |
| GeneCards | Neutrophil extracellular trap formation | MESD     |

|           |                                         |         |
|-----------|-----------------------------------------|---------|
| GeneCards | Neutrophil extracellular trap formation | HROB    |
| GeneCards | Neutrophil extracellular trap formation | SLC27A3 |
| GeneCards | Neutrophil extracellular trap formation | TMUB2   |
| GeneCards | Neutrophil extracellular trap formation | TMEM119 |
| GeneCards | Neutrophil extracellular trap formation | TAF10   |
| GeneCards | Neutrophil extracellular trap formation | TIFA    |
| GeneCards | Neutrophil extracellular trap formation | EFHC2   |
| GeneCards | Neutrophil extracellular trap formation | BMP5    |
| GeneCards | Neutrophil extracellular trap formation | GGCX    |
| GeneCards | Neutrophil extracellular trap formation | LEFTY1  |
| GeneCards | Neutrophil extracellular trap formation | INSIG2  |
| GeneCards | Neutrophil extracellular trap formation | HIRIP3  |
| GeneCards | Neutrophil extracellular trap formation | BCCIP   |
| GeneCards | Neutrophil extracellular trap formation | EZH1    |
| GeneCards | Neutrophil extracellular trap formation | GSG1    |
| GeneCards | Neutrophil extracellular trap formation | TXNDC12 |
| GeneCards | Neutrophil extracellular trap formation | OTC     |
| GeneCards | Neutrophil extracellular trap formation | CALHM4  |
| GeneCards | Neutrophil extracellular trap formation | PTPN18  |
| GeneCards | Neutrophil extracellular trap formation | SGTA    |
| GeneCards | Neutrophil extracellular trap formation | HAUS2   |
| GeneCards | Neutrophil extracellular trap formation | ORC2    |

|           |                                         |         |
|-----------|-----------------------------------------|---------|
| GeneCards | Neutrophil extracellular trap formation | SNIP1   |
| GeneCards | Neutrophil extracellular trap formation | EDEM2   |
| GeneCards | Neutrophil extracellular trap formation | L3MBTL3 |
| GeneCards | Neutrophil extracellular trap formation | ZCCHC2  |
| GeneCards | Neutrophil extracellular trap formation | SURF4   |
| GeneCards | Neutrophil extracellular trap formation | MFSD5   |
| GeneCards | Neutrophil extracellular trap formation | GCAT    |
| GeneCards | Neutrophil extracellular trap formation | PSMA3   |
| GeneCards | Neutrophil extracellular trap formation | SPINK6  |
| GeneCards | Neutrophil extracellular trap formation | ZIC2    |
| GeneCards | Neutrophil extracellular trap formation | BCL11A  |
| GeneCards | Neutrophil extracellular trap formation | KRBA1   |
| GeneCards | Neutrophil extracellular trap formation | H4C1    |
| GeneCards | Neutrophil extracellular trap formation | CCM2    |
| GeneCards | Neutrophil extracellular trap formation | RPL10A  |
| GeneCards | Neutrophil extracellular trap formation | POU2F2  |
| GeneCards | Neutrophil extracellular trap formation | RAB21   |
| GeneCards | Neutrophil extracellular trap formation | UBE4A   |
| GeneCards | Neutrophil extracellular trap formation | RTF2    |
| GeneCards | Neutrophil extracellular trap formation | ARMCX1  |
| GeneCards | Neutrophil extracellular trap formation | TM2D2   |
| GeneCards | Neutrophil extracellular trap formation | USP24   |

|           |                                         |          |
|-----------|-----------------------------------------|----------|
| GeneCards | Neutrophil extracellular trap formation | TMEM201  |
| GeneCards | Neutrophil extracellular trap formation | CNGB1    |
| GeneCards | Neutrophil extracellular trap formation | DCK      |
| GeneCards | Neutrophil extracellular trap formation | PPP6R1   |
| GeneCards | Neutrophil extracellular trap formation | URM1     |
| GeneCards | Neutrophil extracellular trap formation | ZNF568   |
| GeneCards | Neutrophil extracellular trap formation | CHMP7    |
| GeneCards | Neutrophil extracellular trap formation | ASB6     |
| GeneCards | Neutrophil extracellular trap formation | MIGA2    |
| GeneCards | Neutrophil extracellular trap formation | SYN1     |
| GeneCards | Neutrophil extracellular trap formation | PCK2     |
| GeneCards | Neutrophil extracellular trap formation | SEMA5B   |
| GeneCards | Neutrophil extracellular trap formation | ZMIZ2    |
| GeneCards | Neutrophil extracellular trap formation | C1orf131 |
| GeneCards | Neutrophil extracellular trap formation | DROSHA   |
| GeneCards | Neutrophil extracellular trap formation | R3HCC1L  |
| GeneCards | Neutrophil extracellular trap formation | TMEM139  |
| GeneCards | Neutrophil extracellular trap formation | PGRMC2   |
| GeneCards | Neutrophil extracellular trap formation | WDTC1    |
| GeneCards | Neutrophil extracellular trap formation | TOP3A    |
| GeneCards | Neutrophil extracellular trap formation | SLC39A10 |
| GeneCards | Neutrophil extracellular trap formation | AIF1L    |

|           |                                         |          |
|-----------|-----------------------------------------|----------|
| GeneCards | Neutrophil extracellular trap formation | PLGRKT   |
| GeneCards | Neutrophil extracellular trap formation | SEPTIN10 |
| GeneCards | Neutrophil extracellular trap formation | ZNF606   |
| GeneCards | Neutrophil extracellular trap formation | RPL26L1  |
| GeneCards | Neutrophil extracellular trap formation | KCNA4    |
| GeneCards | Neutrophil extracellular trap formation | HAUS3    |
| GeneCards | Neutrophil extracellular trap formation | GSPT1    |
| GeneCards | Neutrophil extracellular trap formation | CYP4F2   |
| GeneCards | Neutrophil extracellular trap formation | SYNCRIP  |
| GeneCards | Neutrophil extracellular trap formation | SLC44A4  |
| GeneCards | Neutrophil extracellular trap formation | TRA2A    |
| GeneCards | Neutrophil extracellular trap formation | TRIQK    |
| GeneCards | Neutrophil extracellular trap formation | UBE2J1   |
| GeneCards | Neutrophil extracellular trap formation | GLYCTK   |
| GeneCards | Neutrophil extracellular trap formation | FCRL5    |
| GeneCards | Neutrophil extracellular trap formation | OTX1     |
| GeneCards | Neutrophil extracellular trap formation | MCM9     |
| GeneCards | Neutrophil extracellular trap formation | VEZF1    |
| GeneCards | Neutrophil extracellular trap formation | PCYT1B   |
| GeneCards | Neutrophil extracellular trap formation | TRIOBP   |
| GeneCards | Neutrophil extracellular trap formation | DDX54    |
| GeneCards | Neutrophil extracellular trap formation | CATSPERG |



|           |                                         |         |
|-----------|-----------------------------------------|---------|
| GeneCards | Neutrophil extracellular trap formation | ATP5F1C |
| GeneCards | Neutrophil extracellular trap formation | IDH3B   |
| GeneCards | Neutrophil extracellular trap formation | CBR3    |
| GeneCards | Neutrophil extracellular trap formation | SCIN    |
| GeneCards | Neutrophil extracellular trap formation | SHKBP1  |
| GeneCards | Neutrophil extracellular trap formation | SCO2    |
| GeneCards | Neutrophil extracellular trap formation | BRD9    |
| GeneCards | Neutrophil extracellular trap formation | CARM1   |
| GeneCards | Neutrophil extracellular trap formation | FAM83D  |
| GeneCards | Neutrophil extracellular trap formation | VMP1    |
| GeneCards | Neutrophil extracellular trap formation | AJUBA   |
| GeneCards | Neutrophil extracellular trap formation | MAP4    |
| GeneCards | Neutrophil extracellular trap formation | EIF5    |
| GeneCards | Neutrophil extracellular trap formation | KRTCAP3 |
| GeneCards | Neutrophil extracellular trap formation | MCPH1   |
| GeneCards | Neutrophil extracellular trap formation | LRRC28  |
| GeneCards | Neutrophil extracellular trap formation | GAK     |
| GeneCards | Neutrophil extracellular trap formation | DCST1   |
| GeneCards | Neutrophil extracellular trap formation | PTCD3   |
| GeneCards | Neutrophil extracellular trap formation | HBP1    |
| GeneCards | Neutrophil extracellular trap formation | H1-0    |
| GeneCards | Neutrophil extracellular trap formation | TMCO3   |

|           |                                         |          |
|-----------|-----------------------------------------|----------|
| GeneCards | Neutrophil extracellular trap formation | SULT1A2  |
| GeneCards | Neutrophil extracellular trap formation | KRT20    |
| GeneCards | Neutrophil extracellular trap formation | CLPTM1   |
| GeneCards | Neutrophil extracellular trap formation | PPP1R15A |
| GeneCards | Neutrophil extracellular trap formation | ATG4B    |
| GeneCards | Neutrophil extracellular trap formation | PACS1    |
| GeneCards | Neutrophil extracellular trap formation | CINP     |
| GeneCards | Neutrophil extracellular trap formation | NUP205   |
| GeneCards | Neutrophil extracellular trap formation | MSI1     |
| GeneCards | Neutrophil extracellular trap formation | NOP14    |
| GeneCards | Neutrophil extracellular trap formation | CASKIN2  |
| GeneCards | Neutrophil extracellular trap formation | PAOX     |
| GeneCards | Neutrophil extracellular trap formation | CENPJ    |
| GeneCards | Neutrophil extracellular trap formation | GTSE1    |
| GeneCards | Neutrophil extracellular trap formation | CDX2     |
| GeneCards | Neutrophil extracellular trap formation | TREML4   |
| GeneCards | Neutrophil extracellular trap formation | LRRC1    |
| GeneCards | Neutrophil extracellular trap formation | MNX1     |
| GeneCards | Neutrophil extracellular trap formation | CD163L1  |
| GeneCards | Neutrophil extracellular trap formation | RNPS1    |
| GeneCards | Neutrophil extracellular trap formation | TCP11L2  |
| GeneCards | Neutrophil extracellular trap formation | ZNF143   |

|           |                                         |            |
|-----------|-----------------------------------------|------------|
| GeneCards | Neutrophil extracellular trap formation | MORC3      |
| GeneCards | Neutrophil extracellular trap formation | GMPPA      |
| GeneCards | Neutrophil extracellular trap formation | SLC38A9    |
| GeneCards | Neutrophil extracellular trap formation | GPR78      |
| GeneCards | Neutrophil extracellular trap formation | MRPS18A    |
| GeneCards | Neutrophil extracellular trap formation | MITD1      |
| GeneCards | Neutrophil extracellular trap formation | AGAP2      |
| GeneCards | Neutrophil extracellular trap formation | IGHV4-38-2 |
| GeneCards | Neutrophil extracellular trap formation | ULBP2      |
| GeneCards | Neutrophil extracellular trap formation | PAG1       |
| GeneCards | Neutrophil extracellular trap formation | PJA1       |
| GeneCards | Neutrophil extracellular trap formation | NIPSNAP1   |
| GeneCards | Neutrophil extracellular trap formation | EBP        |
| GeneCards | Neutrophil extracellular trap formation | FAM104A    |
| GeneCards | Neutrophil extracellular trap formation | DNAJC17    |
| GeneCards | Neutrophil extracellular trap formation | METTL2B    |
| GeneCards | Neutrophil extracellular trap formation | ZNF696     |
| GeneCards | Neutrophil extracellular trap formation | UBXN2A     |
| GeneCards | Neutrophil extracellular trap formation | FOCAD      |
| GeneCards | Neutrophil extracellular trap formation | APOBEC3G   |
| GeneCards | Neutrophil extracellular trap formation | RSPH14     |
| GeneCards | Neutrophil extracellular trap formation | LRRN2      |

|           |                                         |         |
|-----------|-----------------------------------------|---------|
| GeneCards | Neutrophil extracellular trap formation | FEZ2    |
| GeneCards | Neutrophil extracellular trap formation | ABHD12  |
| GeneCards | Neutrophil extracellular trap formation | INTS13  |
| GeneCards | Neutrophil extracellular trap formation | DHRS13  |
| GeneCards | Neutrophil extracellular trap formation | NOLC1   |
| GeneCards | Neutrophil extracellular trap formation | SPTBN2  |
| GeneCards | Neutrophil extracellular trap formation | RPL4    |
| GeneCards | Neutrophil extracellular trap formation | ATP7B   |
| GeneCards | Neutrophil extracellular trap formation | LDB2    |
| GeneCards | Neutrophil extracellular trap formation | BLK     |
| GeneCards | Neutrophil extracellular trap formation | DNER    |
| GeneCards | Neutrophil extracellular trap formation | NDUFA6  |
| GeneCards | Neutrophil extracellular trap formation | DTWD2   |
| GeneCards | Neutrophil extracellular trap formation | HDHD5   |
| GeneCards | Neutrophil extracellular trap formation | MTX1    |
| GeneCards | Neutrophil extracellular trap formation | TMEM41B |
| GeneCards | Neutrophil extracellular trap formation | BIN3    |
| GeneCards | Neutrophil extracellular trap formation | NCEH1   |
| GeneCards | Neutrophil extracellular trap formation | TMEM97  |
| GeneCards | Neutrophil extracellular trap formation | CYTOR   |
| GeneCards | Neutrophil extracellular trap formation | SORBS1  |
| GeneCards | Neutrophil extracellular trap formation | ZXDC    |

|           |                                         |         |
|-----------|-----------------------------------------|---------|
| GeneCards | Neutrophil extracellular trap formation | NUP155  |
| GeneCards | Neutrophil extracellular trap formation | SCML1   |
| GeneCards | Neutrophil extracellular trap formation | SENP2   |
| GeneCards | Neutrophil extracellular trap formation | PTRHD1  |
| GeneCards | Neutrophil extracellular trap formation | AKAP5   |
| GeneCards | Neutrophil extracellular trap formation | NREP    |
| GeneCards | Neutrophil extracellular trap formation | TMTC3   |
| GeneCards | Neutrophil extracellular trap formation | CLPX    |
| GeneCards | Neutrophil extracellular trap formation | MAGED2  |
| GeneCards | Neutrophil extracellular trap formation | PTPRCAP |
| GeneCards | Neutrophil extracellular trap formation | PCDHA12 |
| GeneCards | Neutrophil extracellular trap formation | RCN2    |
| GeneCards | Neutrophil extracellular trap formation | RPRM    |
| GeneCards | Neutrophil extracellular trap formation | RPP40   |
| GeneCards | Neutrophil extracellular trap formation | BPIFB2  |
| GeneCards | Neutrophil extracellular trap formation | CLK1    |
| GeneCards | Neutrophil extracellular trap formation | AP2A1   |
| GeneCards | Neutrophil extracellular trap formation | TPPP    |
| GeneCards | Neutrophil extracellular trap formation | STAM2   |
| GeneCards | Neutrophil extracellular trap formation | UBE2N   |
| GeneCards | Neutrophil extracellular trap formation | SCIRT   |
| GeneCards | Neutrophil extracellular trap formation | OST4    |

|           |                                         |          |
|-----------|-----------------------------------------|----------|
| GeneCards | Neutrophil extracellular trap formation | CNIH1    |
| GeneCards | Neutrophil extracellular trap formation | EXD2     |
| GeneCards | Neutrophil extracellular trap formation | ANAPC4   |
| GeneCards | Neutrophil extracellular trap formation | LIN37    |
| GeneCards | Neutrophil extracellular trap formation | PDCD2    |
| GeneCards | Neutrophil extracellular trap formation | TNFRSF21 |
| GeneCards | Neutrophil extracellular trap formation | ERCC4    |
| GeneCards | Neutrophil extracellular trap formation | SYNGAP1  |
| GeneCards | Neutrophil extracellular trap formation | RPS23    |
| GeneCards | Neutrophil extracellular trap formation | UBE2H    |
| GeneCards | Neutrophil extracellular trap formation | BCDIN3D  |
| GeneCards | Neutrophil extracellular trap formation | GK5      |
| GeneCards | Neutrophil extracellular trap formation | BPIFA2   |
| GeneCards | Neutrophil extracellular trap formation | STOML2   |
| GeneCards | Neutrophil extracellular trap formation | UBE2M    |
| GeneCards | Neutrophil extracellular trap formation | ANKS6    |
| GeneCards | Neutrophil extracellular trap formation | SKA1     |
| GeneCards | Neutrophil extracellular trap formation | MGST1    |
| GeneCards | Neutrophil extracellular trap formation | STRN3    |
| GeneCards | Neutrophil extracellular trap formation | PDZK1    |
| GeneCards | Neutrophil extracellular trap formation | ZDHHC9   |
| GeneCards | Neutrophil extracellular trap formation | NBEA     |

|           |                                         |          |
|-----------|-----------------------------------------|----------|
| GeneCards | Neutrophil extracellular trap formation | AMHR2    |
| GeneCards | Neutrophil extracellular trap formation | TBC1D24  |
| GeneCards | Neutrophil extracellular trap formation | CCSER2   |
| GeneCards | Neutrophil extracellular trap formation | C6orf120 |
| GeneCards | Neutrophil extracellular trap formation | MCAT     |
| GeneCards | Neutrophil extracellular trap formation | ABT1     |
| GeneCards | Neutrophil extracellular trap formation | ZDHHC5   |
| GeneCards | Neutrophil extracellular trap formation | FYB1     |
| GeneCards | Neutrophil extracellular trap formation | RRN3     |
| GeneCards | Neutrophil extracellular trap formation | CNDP1    |
| GeneCards | Neutrophil extracellular trap formation | PEX12    |
| GeneCards | Neutrophil extracellular trap formation | GCC2     |
| GeneCards | Neutrophil extracellular trap formation | ZNF160   |
| GeneCards | Neutrophil extracellular trap formation | BRF1     |
| GeneCards | Neutrophil extracellular trap formation | ANK3     |
| GeneCards | Neutrophil extracellular trap formation | CUL2     |
| GeneCards | Neutrophil extracellular trap formation | ARL6IP5  |
| GeneCards | Neutrophil extracellular trap formation | ERLEC1   |
| GeneCards | Neutrophil extracellular trap formation | HSDL2    |
| GeneCards | Neutrophil extracellular trap formation | DOP1B    |
| GeneCards | Neutrophil extracellular trap formation | SNX14    |
| GeneCards | Neutrophil extracellular trap formation | SAMM50   |

|           |                                         |         |
|-----------|-----------------------------------------|---------|
| GeneCards | Neutrophil extracellular trap formation | MAD1L1  |
| GeneCards | Neutrophil extracellular trap formation | OSBPL6  |
| GeneCards | Neutrophil extracellular trap formation | GNB1L   |
| GeneCards | Neutrophil extracellular trap formation | GRIK2   |
| GeneCards | Neutrophil extracellular trap formation | BUB3    |
| GeneCards | Neutrophil extracellular trap formation | GSE1    |
| GeneCards | Neutrophil extracellular trap formation | SYT7    |
| GeneCards | Neutrophil extracellular trap formation | CDYL    |
| GeneCards | Neutrophil extracellular trap formation | LIN52   |
| GeneCards | Neutrophil extracellular trap formation | CDO1    |
| GeneCards | Neutrophil extracellular trap formation | ELOA    |
| GeneCards | Neutrophil extracellular trap formation | SAMHD1  |
| GeneCards | Neutrophil extracellular trap formation | HAO1    |
| GeneCards | Neutrophil extracellular trap formation | UBXN8   |
| GeneCards | Neutrophil extracellular trap formation | NOC2L   |
| GeneCards | Neutrophil extracellular trap formation | STX8    |
| GeneCards | Neutrophil extracellular trap formation | RDH10   |
| GeneCards | Neutrophil extracellular trap formation | NCBP1   |
| GeneCards | Neutrophil extracellular trap formation | UBE2C   |
| GeneCards | Neutrophil extracellular trap formation | SULT1A1 |
| GeneCards | Neutrophil extracellular trap formation | SLC30A1 |
| GeneCards | Neutrophil extracellular trap formation | SLAIN2  |



|           |                                         |          |
|-----------|-----------------------------------------|----------|
| GeneCards | Neutrophil extracellular trap formation | TRMT6    |
| GeneCards | Neutrophil extracellular trap formation | IER5L    |
| GeneCards | Neutrophil extracellular trap formation | ARHGAP12 |
| GeneCards | Neutrophil extracellular trap formation | KCNA3    |
| GeneCards | Neutrophil extracellular trap formation | PKP1     |
| GeneCards | Neutrophil extracellular trap formation | RAD21    |
| GeneCards | Neutrophil extracellular trap formation | TMEM144  |
| GeneCards | Neutrophil extracellular trap formation | RBM25    |
| GeneCards | Neutrophil extracellular trap formation | ZMAT1    |
| GeneCards | Neutrophil extracellular trap formation | SLC26A6  |
| GeneCards | Neutrophil extracellular trap formation | ENTREP1  |
| GeneCards | Neutrophil extracellular trap formation | KIFAP3   |
| GeneCards | Neutrophil extracellular trap formation | GLIPR1   |
| GeneCards | Neutrophil extracellular trap formation | TUBB6    |
| GeneCards | Neutrophil extracellular trap formation | IFT74    |
| GeneCards | Neutrophil extracellular trap formation | CDH24    |
| GeneCards | Neutrophil extracellular trap formation | VKORC1   |
| GeneCards | Neutrophil extracellular trap formation | USP11    |
| GeneCards | Neutrophil extracellular trap formation | TINCR    |
| GeneCards | Neutrophil extracellular trap formation | GRIN2C   |
| GeneCards | Neutrophil extracellular trap formation | RAB9A    |
| GeneCards | Neutrophil extracellular trap formation | RETREG3  |

|           |                                         |          |
|-----------|-----------------------------------------|----------|
| GeneCards | Neutrophil extracellular trap formation | CRNKL1   |
| GeneCards | Neutrophil extracellular trap formation | DYNC11I1 |
| GeneCards | Neutrophil extracellular trap formation | TRIM21   |
| GeneCards | Neutrophil extracellular trap formation | NAPEPLD  |
| GeneCards | Neutrophil extracellular trap formation | ZNF407   |
| GeneCards | Neutrophil extracellular trap formation | MCRIP1   |
| GeneCards | Neutrophil extracellular trap formation | RNF14    |
| GeneCards | Neutrophil extracellular trap formation | SUGP2    |
| GeneCards | Neutrophil extracellular trap formation | TTC3     |
| GeneCards | Neutrophil extracellular trap formation | IARS2    |
| GeneCards | Neutrophil extracellular trap formation | APOC2    |
| GeneCards | Neutrophil extracellular trap formation | PIGK     |
| GeneCards | Neutrophil extracellular trap formation | RABEPK   |
| GeneCards | Neutrophil extracellular trap formation | TTC4     |
| GeneCards | Neutrophil extracellular trap formation | PIGG     |
| GeneCards | Neutrophil extracellular trap formation | SH3GLB1  |
| GeneCards | Neutrophil extracellular trap formation | PDLIM4   |
| GeneCards | Neutrophil extracellular trap formation | RAB15    |
| GeneCards | Neutrophil extracellular trap formation | SLC52A3  |
| GeneCards | Neutrophil extracellular trap formation | SPG11    |
| GeneCards | Neutrophil extracellular trap formation | NCAPD3   |
| GeneCards | Neutrophil extracellular trap formation | SLC38A5  |

|           |                                         |         |
|-----------|-----------------------------------------|---------|
| GeneCards | Neutrophil extracellular trap formation | SLC28A1 |
| GeneCards | Neutrophil extracellular trap formation | BBOX1   |
| GeneCards | Neutrophil extracellular trap formation | CMTM3   |
| GeneCards | Neutrophil extracellular trap formation | FEM1B   |
| GeneCards | Neutrophil extracellular trap formation | KHDRBS3 |
| GeneCards | Neutrophil extracellular trap formation | OXCT1   |
| GeneCards | Neutrophil extracellular trap formation | H4C2    |
| GeneCards | Neutrophil extracellular trap formation | SFXN3   |
| GeneCards | Neutrophil extracellular trap formation | ZNF808  |
| GeneCards | Neutrophil extracellular trap formation | NHS     |
| GeneCards | Neutrophil extracellular trap formation | PIK3R4  |
| GeneCards | Neutrophil extracellular trap formation | TCEAL1  |
| GeneCards | Neutrophil extracellular trap formation | WAPL    |
| GeneCards | Neutrophil extracellular trap formation | EIF4B   |
| GeneCards | Neutrophil extracellular trap formation | OTOR    |
| GeneCards | Neutrophil extracellular trap formation | PRKAR1B |
| GeneCards | Neutrophil extracellular trap formation | PFDN6   |
| GeneCards | Neutrophil extracellular trap formation | WDR62   |
| GeneCards | Neutrophil extracellular trap formation | SLC35A5 |
| GeneCards | Neutrophil extracellular trap formation | ANKRD36 |
| GeneCards | Neutrophil extracellular trap formation | BAIAP3  |
| GeneCards | Neutrophil extracellular trap formation | FAM50A  |

|           |                                         |         |
|-----------|-----------------------------------------|---------|
| GeneCards | Neutrophil extracellular trap formation | PES1    |
| GeneCards | Neutrophil extracellular trap formation | OMA1    |
| GeneCards | Neutrophil extracellular trap formation | ATIC    |
| GeneCards | Neutrophil extracellular trap formation | SCD5    |
| GeneCards | Neutrophil extracellular trap formation | ATP5PD  |
| GeneCards | Neutrophil extracellular trap formation | SEZ6L   |
| GeneCards | Neutrophil extracellular trap formation | BTN3A2  |
| GeneCards | Neutrophil extracellular trap formation | GNAL    |
| GeneCards | Neutrophil extracellular trap formation | DPEP2   |
| GeneCards | Neutrophil extracellular trap formation | COPZ1   |
| GeneCards | Neutrophil extracellular trap formation | NIT1    |
| GeneCards | Neutrophil extracellular trap formation | ELMOD2  |
| GeneCards | Neutrophil extracellular trap formation | UBR1    |
| GeneCards | Neutrophil extracellular trap formation | DCAF10  |
| GeneCards | Neutrophil extracellular trap formation | OTUD6B  |
| GeneCards | Neutrophil extracellular trap formation | ZFP90   |
| GeneCards | Neutrophil extracellular trap formation | APCDD1L |
| GeneCards | Neutrophil extracellular trap formation | BLCAP   |
| GeneCards | Neutrophil extracellular trap formation | BBS12   |
| GeneCards | Neutrophil extracellular trap formation | ATG14   |
| GeneCards | Neutrophil extracellular trap formation | MBLAC1  |
| GeneCards | Neutrophil extracellular trap formation | TFPT    |

|           |                                         |          |
|-----------|-----------------------------------------|----------|
| GeneCards | Neutrophil extracellular trap formation | CRYGD    |
| GeneCards | Neutrophil extracellular trap formation | HNRNPF   |
| GeneCards | Neutrophil extracellular trap formation | CLUH     |
| GeneCards | Neutrophil extracellular trap formation | ZNF329   |
| GeneCards | Neutrophil extracellular trap formation | ISY1     |
| GeneCards | Neutrophil extracellular trap formation | GKN2     |
| GeneCards | Neutrophil extracellular trap formation | ZNF658   |
| GeneCards | Neutrophil extracellular trap formation | PLEKHA5  |
| GeneCards | Neutrophil extracellular trap formation | THAP11   |
| GeneCards | Neutrophil extracellular trap formation | GINM1    |
| GeneCards | Neutrophil extracellular trap formation | EEF1B2   |
| GeneCards | Neutrophil extracellular trap formation | TSPAN5   |
| GeneCards | Neutrophil extracellular trap formation | IPO8     |
| GeneCards | Neutrophil extracellular trap formation | CALCOCO1 |
| GeneCards | Neutrophil extracellular trap formation | EEF1E1   |
| GeneCards | Neutrophil extracellular trap formation | IPO11    |
| GeneCards | Neutrophil extracellular trap formation | RIOK3    |
| GeneCards | Neutrophil extracellular trap formation | MAS1     |
| GeneCards | Neutrophil extracellular trap formation | VPS50    |
| GeneCards | Neutrophil extracellular trap formation | FARP1    |
| GeneCards | Neutrophil extracellular trap formation | DCP2     |
| GeneCards | Neutrophil extracellular trap formation | GPBP1    |

|           |                                         |         |
|-----------|-----------------------------------------|---------|
| GeneCards | Neutrophil extracellular trap formation | NAT14   |
| GeneCards | Neutrophil extracellular trap formation | CILK1   |
| GeneCards | Neutrophil extracellular trap formation | SUGT1   |
| GeneCards | Neutrophil extracellular trap formation | RBM12B  |
| GeneCards | Neutrophil extracellular trap formation | SEPTIN3 |
| GeneCards | Neutrophil extracellular trap formation | ATG9A   |
| GeneCards | Neutrophil extracellular trap formation | H4C9    |
| GeneCards | Neutrophil extracellular trap formation | H4C13   |
| GeneCards | Neutrophil extracellular trap formation | H4C4    |
| GeneCards | Neutrophil extracellular trap formation | H4C6    |
| GeneCards | Neutrophil extracellular trap formation | GBP5    |
| GeneCards | Neutrophil extracellular trap formation | DKKL1   |
| GeneCards | Neutrophil extracellular trap formation | CDH19   |
| GeneCards | Neutrophil extracellular trap formation | DNPH1   |
| GeneCards | Neutrophil extracellular trap formation | ELOVL1  |
| GeneCards | Neutrophil extracellular trap formation | SLC29A2 |
| GeneCards | Neutrophil extracellular trap formation | FLII    |
| GeneCards | Neutrophil extracellular trap formation | UQCRH   |
| GeneCards | Neutrophil extracellular trap formation | AGTRAP  |
| GeneCards | Neutrophil extracellular trap formation | SLFN11  |
| GeneCards | Neutrophil extracellular trap formation | HERC2   |
| GeneCards | Neutrophil extracellular trap formation | ABLIM1  |

|           |                                         |            |
|-----------|-----------------------------------------|------------|
| GeneCards | Neutrophil extracellular trap formation | SNAP47     |
| GeneCards | Neutrophil extracellular trap formation | FUT10      |
| GeneCards | Neutrophil extracellular trap formation | ACTR1A     |
| GeneCards | Neutrophil extracellular trap formation | NUTM2A-AS1 |
| GeneCards | Neutrophil extracellular trap formation | TASOR      |
| GeneCards | Neutrophil extracellular trap formation | SLC25A22   |
| GeneCards | Neutrophil extracellular trap formation | CCAR1      |
| GeneCards | Neutrophil extracellular trap formation | IWS1       |
| GeneCards | Neutrophil extracellular trap formation | FIS1       |
| GeneCards | Neutrophil extracellular trap formation | NDC1       |
| GeneCards | Neutrophil extracellular trap formation | ARHGAP5    |
| GeneCards | Neutrophil extracellular trap formation | ASH2L      |
| GeneCards | Neutrophil extracellular trap formation | INTS10     |
| GeneCards | Neutrophil extracellular trap formation | SSH3       |
| GeneCards | Neutrophil extracellular trap formation | ANGPTL3    |
| GeneCards | Neutrophil extracellular trap formation | BRD7       |
| GeneCards | Neutrophil extracellular trap formation | SLC66A1    |
| GeneCards | Neutrophil extracellular trap formation | KCNB1      |
| GeneCards | Neutrophil extracellular trap formation | LPGAT1     |
| GeneCards | Neutrophil extracellular trap formation | ZNF274     |
| GeneCards | Neutrophil extracellular trap formation | A3GALT2    |
| GeneCards | Neutrophil extracellular trap formation | SPACA9     |

|           |                                         |           |
|-----------|-----------------------------------------|-----------|
| GeneCards | Neutrophil extracellular trap formation | RBM15B    |
| GeneCards | Neutrophil extracellular trap formation | RAB9B     |
| GeneCards | Neutrophil extracellular trap formation | MTTP      |
| GeneCards | Neutrophil extracellular trap formation | RAD23B    |
| GeneCards | Neutrophil extracellular trap formation | OSGEP     |
| GeneCards | Neutrophil extracellular trap formation | TMEM178A  |
| GeneCards | Neutrophil extracellular trap formation | DCLK2     |
| GeneCards | Neutrophil extracellular trap formation | STOML1    |
| GeneCards | Neutrophil extracellular trap formation | SPDEF     |
| GeneCards | Neutrophil extracellular trap formation | MTBP      |
| GeneCards | Neutrophil extracellular trap formation | UBE2W     |
| GeneCards | Neutrophil extracellular trap formation | SKA3      |
| GeneCards | Neutrophil extracellular trap formation | PTTG1     |
| GeneCards | Neutrophil extracellular trap formation | IGSF8     |
| GeneCards | Neutrophil extracellular trap formation | PTDSS1    |
| GeneCards | Neutrophil extracellular trap formation | HDGFL2    |
| GeneCards | Neutrophil extracellular trap formation | RPS4X     |
| GeneCards | Neutrophil extracellular trap formation | RAB11FIP2 |
| GeneCards | Neutrophil extracellular trap formation | PHKA1     |
| GeneCards | Neutrophil extracellular trap formation | ELF5      |
| GeneCards | Neutrophil extracellular trap formation | DEGS1     |
| GeneCards | Neutrophil extracellular trap formation | KIRREL1   |



|           |                                         |            |
|-----------|-----------------------------------------|------------|
| GeneCards | Neutrophil extracellular trap formation | STAMBP     |
| GeneCards | Neutrophil extracellular trap formation | ZC3HAV1L   |
| GeneCards | Neutrophil extracellular trap formation | TMEM177    |
| GeneCards | Neutrophil extracellular trap formation | ATP5MK     |
| GeneCards | Neutrophil extracellular trap formation | DEFB132    |
| GeneCards | Neutrophil extracellular trap formation | MFSD8      |
| GeneCards | Neutrophil extracellular trap formation | PALS2      |
| GeneCards | Neutrophil extracellular trap formation | AP5B1      |
| GeneCards | Neutrophil extracellular trap formation | MAP7D2     |
| GeneCards | Neutrophil extracellular trap formation | MYH7B      |
| GeneCards | Neutrophil extracellular trap formation | TENT4B     |
| GeneCards | Neutrophil extracellular trap formation | DNAH5      |
| GeneCards | Neutrophil extracellular trap formation | RNASEH2B   |
| GeneCards | Neutrophil extracellular trap formation | ZNF800     |
| GeneCards | Neutrophil extracellular trap formation | ZIC3       |
| GeneCards | Neutrophil extracellular trap formation | RLN3       |
| GeneCards | Neutrophil extracellular trap formation | KIF16B     |
| GeneCards | Neutrophil extracellular trap formation | ART5       |
| GeneCards | Neutrophil extracellular trap formation | SENP7      |
| GeneCards | Neutrophil extracellular trap formation | ST6GALNAC2 |
| GeneCards | Neutrophil extracellular trap formation | TCF20      |
| GeneCards | Neutrophil extracellular trap formation | DHRS7      |

|           |                                         |         |
|-----------|-----------------------------------------|---------|
| GeneCards | Neutrophil extracellular trap formation | DTX2    |
| GeneCards | Neutrophil extracellular trap formation | LZTFL1  |
| GeneCards | Neutrophil extracellular trap formation | NIFK    |
| GeneCards | Neutrophil extracellular trap formation | TMEM100 |
| GeneCards | Neutrophil extracellular trap formation | GKN1    |
| GeneCards | Neutrophil extracellular trap formation | NAA25   |
| GeneCards | Neutrophil extracellular trap formation | AXDND1  |
| GeneCards | Neutrophil extracellular trap formation | CLCC1   |
| GeneCards | Neutrophil extracellular trap formation | MGAT2   |
| GeneCards | Neutrophil extracellular trap formation | TAF2    |
| GeneCards | Neutrophil extracellular trap formation | APMAP   |
| GeneCards | Neutrophil extracellular trap formation | SNRPD3  |
| GeneCards | Neutrophil extracellular trap formation | CHMP2A  |
| GeneCards | Neutrophil extracellular trap formation | TSSC4   |
| GeneCards | Neutrophil extracellular trap formation | IL17RE  |
| GeneCards | Neutrophil extracellular trap formation | CPXM1   |
| GeneCards | Neutrophil extracellular trap formation | NUP88   |
| GeneCards | Neutrophil extracellular trap formation | ARMC3   |
| GeneCards | Neutrophil extracellular trap formation | ZNF23   |
| GeneCards | Neutrophil extracellular trap formation | RTN4RL1 |
| GeneCards | Neutrophil extracellular trap formation | LTN1    |
| GeneCards | Neutrophil extracellular trap formation | TIMM13  |

|           |                                         |         |
|-----------|-----------------------------------------|---------|
| GeneCards | Neutrophil extracellular trap formation | FNIP2   |
| GeneCards | Neutrophil extracellular trap formation | STEAP2  |
| GeneCards | Neutrophil extracellular trap formation | SCYL2   |
| GeneCards | Neutrophil extracellular trap formation | NELFB   |
| GeneCards | Neutrophil extracellular trap formation | FBXO30  |
| GeneCards | Neutrophil extracellular trap formation | CPA5    |
| GeneCards | Neutrophil extracellular trap formation | BTN2A1  |
| GeneCards | Neutrophil extracellular trap formation | ADARB1  |
| GeneCards | Neutrophil extracellular trap formation | ZNF773  |
| GeneCards | Neutrophil extracellular trap formation | METTL18 |
| GeneCards | Neutrophil extracellular trap formation | GARNL3  |
| GeneCards | Neutrophil extracellular trap formation | THRB    |
| GeneCards | Neutrophil extracellular trap formation | STRN4   |
| GeneCards | Neutrophil extracellular trap formation | SLC25A6 |
| GeneCards | Neutrophil extracellular trap formation | H3C10   |
| GeneCards | Neutrophil extracellular trap formation | MFSD2B  |
| GeneCards | Neutrophil extracellular trap formation | XKR6    |
| GeneCards | Neutrophil extracellular trap formation | TRMT10C |
| GeneCards | Neutrophil extracellular trap formation | CLEC12B |
| GeneCards | Neutrophil extracellular trap formation | BHMT2   |
| GeneCards | Neutrophil extracellular trap formation | CIPC    |
| GeneCards | Neutrophil extracellular trap formation | SUCLG1  |

|           |                                         |          |
|-----------|-----------------------------------------|----------|
| GeneCards | Neutrophil extracellular trap formation | CADM4    |
| GeneCards | Neutrophil extracellular trap formation | SEC22C   |
| GeneCards | Neutrophil extracellular trap formation | INO80B   |
| GeneCards | Neutrophil extracellular trap formation | TGFBRAP1 |
| GeneCards | Neutrophil extracellular trap formation | ZNF767P  |
| GeneCards | Neutrophil extracellular trap formation | AFAP1L2  |
| GeneCards | Neutrophil extracellular trap formation | RPA2     |
| GeneCards | Neutrophil extracellular trap formation | TMEM145  |
| GeneCards | Neutrophil extracellular trap formation | FAM174B  |
| GeneCards | Neutrophil extracellular trap formation | PALB2    |
| GeneCards | Neutrophil extracellular trap formation | SPCS2    |
| GeneCards | Neutrophil extracellular trap formation | ESPNL    |
| GeneCards | Neutrophil extracellular trap formation | VCPKMT   |
| GeneCards | Neutrophil extracellular trap formation | TNFRSF18 |
| GeneCards | Neutrophil extracellular trap formation | BRIP1    |
| GeneCards | Neutrophil extracellular trap formation | DHODH    |
| GeneCards | Neutrophil extracellular trap formation | SBF1     |
| GeneCards | Neutrophil extracellular trap formation | DNAJA3   |
| GeneCards | Neutrophil extracellular trap formation | TTYH3    |
| GeneCards | Neutrophil extracellular trap formation | ASF1A    |
| GeneCards | Neutrophil extracellular trap formation | EGR2     |
| GeneCards | Neutrophil extracellular trap formation | ASCL3    |

|           |                                         |          |
|-----------|-----------------------------------------|----------|
| GeneCards | Neutrophil extracellular trap formation | ANGEL1   |
| GeneCards | Neutrophil extracellular trap formation | MIR133A1 |
| GeneCards | Neutrophil extracellular trap formation | SLC2A11  |
| GeneCards | Neutrophil extracellular trap formation | SEC61G   |
| GeneCards | Neutrophil extracellular trap formation | TMEM209  |
| GeneCards | Neutrophil extracellular trap formation | SPIRE2   |
| GeneCards | Neutrophil extracellular trap formation | INPP5K   |
| GeneCards | Neutrophil extracellular trap formation | FUNDC2   |
| GeneCards | Neutrophil extracellular trap formation | GCNT2    |
| GeneCards | Neutrophil extracellular trap formation | MARCHF5  |
| GeneCards | Neutrophil extracellular trap formation | OPHN1    |
| GeneCards | Neutrophil extracellular trap formation | AASDHPPT |
| GeneCards | Neutrophil extracellular trap formation | LETM1    |
| GeneCards | Neutrophil extracellular trap formation | PDIA5    |
| GeneCards | Neutrophil extracellular trap formation | RB1CC1   |
| GeneCards | Neutrophil extracellular trap formation | SRRM1    |
| GeneCards | Neutrophil extracellular trap formation | DBP      |
| GeneCards | Neutrophil extracellular trap formation | DEFB129  |
| GeneCards | Neutrophil extracellular trap formation | ICE1     |
| GeneCards | Neutrophil extracellular trap formation | PSMB5    |
| GeneCards | Neutrophil extracellular trap formation | HTRA4    |
| GeneCards | Neutrophil extracellular trap formation | PIANP    |

|           |                                         |            |
|-----------|-----------------------------------------|------------|
| GeneCards | Neutrophil extracellular trap formation | LRRC31     |
| GeneCards | Neutrophil extracellular trap formation | SCGN       |
| GeneCards | Neutrophil extracellular trap formation | CALM2      |
| GeneCards | Neutrophil extracellular trap formation | VPS13A     |
| GeneCards | Neutrophil extracellular trap formation | AIMP2      |
| GeneCards | Neutrophil extracellular trap formation | TMIGD1     |
| GeneCards | Neutrophil extracellular trap formation | ERCC6L     |
| GeneCards | Neutrophil extracellular trap formation | C5orf15    |
| GeneCards | Neutrophil extracellular trap formation | LYPLA2     |
| GeneCards | Neutrophil extracellular trap formation | TOPBP1     |
| GeneCards | Neutrophil extracellular trap formation | NCAPH      |
| GeneCards | Neutrophil extracellular trap formation | NDUFA11    |
| GeneCards | Neutrophil extracellular trap formation | TRIM25     |
| GeneCards | Neutrophil extracellular trap formation | ABCE1      |
| GeneCards | Neutrophil extracellular trap formation | ST6GALNAC3 |
| GeneCards | Neutrophil extracellular trap formation | TRIM69     |
| GeneCards | Neutrophil extracellular trap formation | YAF2       |
| GeneCards | Neutrophil extracellular trap formation | C9orf78    |
| GeneCards | Neutrophil extracellular trap formation | JPH3       |
| GeneCards | Neutrophil extracellular trap formation | PAX9       |
| GeneCards | Neutrophil extracellular trap formation | BAIAP2L2   |
| GeneCards | Neutrophil extracellular trap formation | SHPRH      |

|           |                                         |         |
|-----------|-----------------------------------------|---------|
| GeneCards | Neutrophil extracellular trap formation | CAMK2N1 |
| GeneCards | Neutrophil extracellular trap formation | PDP1    |
| GeneCards | Neutrophil extracellular trap formation | HIC2    |
| GeneCards | Neutrophil extracellular trap formation | WDCP    |
| GeneCards | Neutrophil extracellular trap formation | LRRC20  |
| GeneCards | Neutrophil extracellular trap formation | MYO15B  |
| GeneCards | Neutrophil extracellular trap formation | HNRNPAB |
| GeneCards | Neutrophil extracellular trap formation | MORF4L1 |
| GeneCards | Neutrophil extracellular trap formation | POLR2J  |
| GeneCards | Neutrophil extracellular trap formation | NSRP1   |
| GeneCards | Neutrophil extracellular trap formation | C4orf33 |
| GeneCards | Neutrophil extracellular trap formation | CLDN18  |
| GeneCards | Neutrophil extracellular trap formation | ATL3    |
| GeneCards | Neutrophil extracellular trap formation | ARSG    |
| GeneCards | Neutrophil extracellular trap formation | HSPA4L  |
| GeneCards | Neutrophil extracellular trap formation | DMAC2L  |
| GeneCards | Neutrophil extracellular trap formation | GATD3   |
| GeneCards | Neutrophil extracellular trap formation | GCK     |
| GeneCards | Neutrophil extracellular trap formation | PKD1L1  |
| GeneCards | Neutrophil extracellular trap formation | USH1C   |
| GeneCards | Neutrophil extracellular trap formation | FAM241B |
| GeneCards | Neutrophil extracellular trap formation | SLC19A2 |

|           |                                         |         |
|-----------|-----------------------------------------|---------|
| GeneCards | Neutrophil extracellular trap formation | THUMPD1 |
| GeneCards | Neutrophil extracellular trap formation | ZNF83   |
| GeneCards | Neutrophil extracellular trap formation | YBX2    |
| GeneCards | Neutrophil extracellular trap formation | UNC119  |
| GeneCards | Neutrophil extracellular trap formation | IER3    |
| GeneCards | Neutrophil extracellular trap formation | IL4I1   |
| GeneCards | Neutrophil extracellular trap formation | USP14   |
| GeneCards | Neutrophil extracellular trap formation | TMEM81  |
| GeneCards | Neutrophil extracellular trap formation | DUSP7   |
| GeneCards | Neutrophil extracellular trap formation | EP400   |
| GeneCards | Neutrophil extracellular trap formation | VPS35L  |
| GeneCards | Neutrophil extracellular trap formation | RFX6    |
| GeneCards | Neutrophil extracellular trap formation | LAS1L   |
| GeneCards | Neutrophil extracellular trap formation | PAM16   |
| GeneCards | Neutrophil extracellular trap formation | SOCS5   |
| GeneCards | Neutrophil extracellular trap formation | DTD1    |
| GeneCards | Neutrophil extracellular trap formation | PCM1    |
| GeneCards | Neutrophil extracellular trap formation | FDXR    |
| GeneCards | Neutrophil extracellular trap formation | EXOSC3  |
| GeneCards | Neutrophil extracellular trap formation | NEK10   |
| GeneCards | Neutrophil extracellular trap formation | DNAJA4  |
| GeneCards | Neutrophil extracellular trap formation | DSCC1   |



|           |                                         |         |
|-----------|-----------------------------------------|---------|
| GeneCards | Neutrophil extracellular trap formation | KCNK4   |
| GeneCards | Neutrophil extracellular trap formation | UBA3    |
| GeneCards | Neutrophil extracellular trap formation | ADGRG5  |
| GeneCards | Neutrophil extracellular trap formation | GALNT15 |
| GeneCards | Neutrophil extracellular trap formation | CEP97   |
| GeneCards | Neutrophil extracellular trap formation | LAT2    |
| GeneCards | Neutrophil extracellular trap formation | GRIN3A  |
| GeneCards | Neutrophil extracellular trap formation | MGST3   |
| GeneCards | Neutrophil extracellular trap formation | LRRC70  |
| GeneCards | Neutrophil extracellular trap formation | BAG2    |
| GeneCards | Neutrophil extracellular trap formation | MIA2    |
| GeneCards | Neutrophil extracellular trap formation | CHPF2   |
| GeneCards | Neutrophil extracellular trap formation | RAB39A  |
| GeneCards | Neutrophil extracellular trap formation | CDC37L1 |
| GeneCards | Neutrophil extracellular trap formation | CCNT2   |
| GeneCards | Neutrophil extracellular trap formation | GET4    |
| GeneCards | Neutrophil extracellular trap formation | BTBD10  |
| GeneCards | Neutrophil extracellular trap formation | TMEM237 |
| GeneCards | Neutrophil extracellular trap formation | SEC62   |
| GeneCards | Neutrophil extracellular trap formation | MS4A7   |
| GeneCards | Neutrophil extracellular trap formation | MCMBP   |
| GeneCards | Neutrophil extracellular trap formation | THOC2   |

|           |                                         |          |
|-----------|-----------------------------------------|----------|
| GeneCards | Neutrophil extracellular trap formation | RPA4     |
| GeneCards | Neutrophil extracellular trap formation | DDB2     |
| GeneCards | Neutrophil extracellular trap formation | SARS2    |
| GeneCards | Neutrophil extracellular trap formation | PRMT3    |
| GeneCards | Neutrophil extracellular trap formation | MRFAP1   |
| GeneCards | Neutrophil extracellular trap formation | ARSK     |
| GeneCards | Neutrophil extracellular trap formation | TROAP    |
| GeneCards | Neutrophil extracellular trap formation | SYNJ2BP  |
| GeneCards | Neutrophil extracellular trap formation | CC2D1B   |
| GeneCards | Neutrophil extracellular trap formation | TMEM143  |
| GeneCards | Neutrophil extracellular trap formation | FAM171A1 |
| GeneCards | Neutrophil extracellular trap formation | PSMD10   |
| GeneCards | Neutrophil extracellular trap formation | DDX52    |
| GeneCards | Neutrophil extracellular trap formation | KIAA0586 |
| GeneCards | Neutrophil extracellular trap formation | TIMELESS |
| GeneCards | Neutrophil extracellular trap formation | WDR48    |
| GeneCards | Neutrophil extracellular trap formation | FBXO46   |
| GeneCards | Neutrophil extracellular trap formation | HHIPL1   |
| GeneCards | Neutrophil extracellular trap formation | GTF3C3   |
| GeneCards | Neutrophil extracellular trap formation | KIF7     |
| GeneCards | Neutrophil extracellular trap formation | C10orf95 |
| GeneCards | Neutrophil extracellular trap formation | VTCN1    |

|           |                                         |          |
|-----------|-----------------------------------------|----------|
| GeneCards | Neutrophil extracellular trap formation | H1-4     |
| GeneCards | Neutrophil extracellular trap formation | CAVIN2   |
| GeneCards | Neutrophil extracellular trap formation | WDR5     |
| GeneCards | Neutrophil extracellular trap formation | CBX1     |
| GeneCards | Neutrophil extracellular trap formation | CAMSAP1  |
| GeneCards | Neutrophil extracellular trap formation | BRAT1    |
| GeneCards | Neutrophil extracellular trap formation | FASTKD5  |
| GeneCards | Neutrophil extracellular trap formation | UCP1     |
| GeneCards | Neutrophil extracellular trap formation | FMO5     |
| GeneCards | Neutrophil extracellular trap formation | IGFL1    |
| GeneCards | Neutrophil extracellular trap formation | PARG     |
| GeneCards | Neutrophil extracellular trap formation | NEFM     |
| GeneCards | Neutrophil extracellular trap formation | CNIH4    |
| GeneCards | Neutrophil extracellular trap formation | PAX1     |
| GeneCards | Neutrophil extracellular trap formation | BAG4     |
| GeneCards | Neutrophil extracellular trap formation | CHCHD4   |
| GeneCards | Neutrophil extracellular trap formation | RMND5A   |
| GeneCards | Neutrophil extracellular trap formation | RBM27    |
| GeneCards | Neutrophil extracellular trap formation | H3C13    |
| GeneCards | Neutrophil extracellular trap formation | RBM7     |
| GeneCards | Neutrophil extracellular trap formation | CDK2AP2  |
| GeneCards | Neutrophil extracellular trap formation | RASGEF1B |

|           |                                         |         |
|-----------|-----------------------------------------|---------|
| GeneCards | Neutrophil extracellular trap formation | ZNF629  |
| GeneCards | Neutrophil extracellular trap formation | SERP2   |
| GeneCards | Neutrophil extracellular trap formation | EXOSC9  |
| GeneCards | Neutrophil extracellular trap formation | ADRM1   |
| GeneCards | Neutrophil extracellular trap formation | KRT15   |
| GeneCards | Neutrophil extracellular trap formation | LRRC3B  |
| GeneCards | Neutrophil extracellular trap formation | GLRX3   |
| GeneCards | Neutrophil extracellular trap formation | HLCS    |
| GeneCards | Neutrophil extracellular trap formation | SUSD3   |
| GeneCards | Neutrophil extracellular trap formation | ZNF280C |
| GeneCards | Neutrophil extracellular trap formation | FCRLA   |
| GeneCards | Neutrophil extracellular trap formation | NKAPD1  |
| GeneCards | Neutrophil extracellular trap formation | B3GALT2 |
| GeneCards | Neutrophil extracellular trap formation | RLN1    |
| GeneCards | Neutrophil extracellular trap formation | FAM131A |
| GeneCards | Neutrophil extracellular trap formation | SLC35G2 |
| GeneCards | Neutrophil extracellular trap formation | H3C4    |
| GeneCards | Neutrophil extracellular trap formation | HAUS6   |
| GeneCards | Neutrophil extracellular trap formation | RHCG    |
| GeneCards | Neutrophil extracellular trap formation | TSPAN31 |
| GeneCards | Neutrophil extracellular trap formation | ANKRD50 |
| GeneCards | Neutrophil extracellular trap formation | TICRR   |

|           |                                         |          |
|-----------|-----------------------------------------|----------|
| GeneCards | Neutrophil extracellular trap formation | CAV2     |
| GeneCards | Neutrophil extracellular trap formation | CLN3     |
| GeneCards | Neutrophil extracellular trap formation | COPS4    |
| GeneCards | Neutrophil extracellular trap formation | SEMA6B   |
| GeneCards | Neutrophil extracellular trap formation | LRRC18   |
| GeneCards | Neutrophil extracellular trap formation | SYN3     |
| GeneCards | Neutrophil extracellular trap formation | AGPAT3   |
| GeneCards | Neutrophil extracellular trap formation | CSNK1A1L |
| GeneCards | Neutrophil extracellular trap formation | AMY1C    |
| GeneCards | Neutrophil extracellular trap formation | PPP2R5E  |
| GeneCards | Neutrophil extracellular trap formation | H1-2     |
| GeneCards | Neutrophil extracellular trap formation | VAPB     |
| GeneCards | Neutrophil extracellular trap formation | CIAO2B   |
| GeneCards | Neutrophil extracellular trap formation | L3MBTL1  |
| GeneCards | Neutrophil extracellular trap formation | H3C15    |
| GeneCards | Neutrophil extracellular trap formation | HACD2    |
| GeneCards | Neutrophil extracellular trap formation | PUSL1    |
| GeneCards | Neutrophil extracellular trap formation | CSRP2    |
| GeneCards | Neutrophil extracellular trap formation | RNF41    |
| GeneCards | Neutrophil extracellular trap formation | RAET1E   |
| GeneCards | Neutrophil extracellular trap formation | POLM     |
| GeneCards | Neutrophil extracellular trap formation | NCOA4    |

|           |                                         |          |
|-----------|-----------------------------------------|----------|
| GeneCards | Neutrophil extracellular trap formation | AFG3L2   |
| GeneCards | Neutrophil extracellular trap formation | RER1     |
| GeneCards | Neutrophil extracellular trap formation | PLXNA2   |
| GeneCards | Neutrophil extracellular trap formation | ZFC3H1   |
| GeneCards | Neutrophil extracellular trap formation | STOML3   |
| GeneCards | Neutrophil extracellular trap formation | RBP1     |
| GeneCards | Neutrophil extracellular trap formation | CA11     |
| GeneCards | Neutrophil extracellular trap formation | ANK2     |
| GeneCards | Neutrophil extracellular trap formation | CDC42EP1 |
| GeneCards | Neutrophil extracellular trap formation | KRT32    |
| GeneCards | Neutrophil extracellular trap formation | ITM2A    |
| GeneCards | Neutrophil extracellular trap formation | LMBR1    |
| GeneCards | Neutrophil extracellular trap formation | FADS3    |
| GeneCards | Neutrophil extracellular trap formation | SLC25A11 |
| GeneCards | Neutrophil extracellular trap formation | FAM126B  |
| GeneCards | Neutrophil extracellular trap formation | AMER1    |
| GeneCards | Neutrophil extracellular trap formation | CES2     |
| GeneCards | Neutrophil extracellular trap formation | OTUD5    |
| GeneCards | Neutrophil extracellular trap formation | KCTD9    |
| GeneCards | Neutrophil extracellular trap formation | PRKACB   |
| GeneCards | Neutrophil extracellular trap formation | SHC4     |
| GeneCards | Neutrophil extracellular trap formation | CYB5B    |

|           |                                         |         |
|-----------|-----------------------------------------|---------|
| GeneCards | Neutrophil extracellular trap formation | TNP1    |
| GeneCards | Neutrophil extracellular trap formation | FAM222B |
| GeneCards | Neutrophil extracellular trap formation | STEEP1  |
| GeneCards | Neutrophil extracellular trap formation | GPR35   |
| GeneCards | Neutrophil extracellular trap formation | TMEM86A |
| GeneCards | Neutrophil extracellular trap formation | TTC1    |
| GeneCards | Neutrophil extracellular trap formation | USP42   |
| GeneCards | Neutrophil extracellular trap formation | SESTD1  |
| GeneCards | Neutrophil extracellular trap formation | SUPT6H  |
| GeneCards | Neutrophil extracellular trap formation | MT1H    |
| GeneCards | Neutrophil extracellular trap formation | EPM2A   |
| GeneCards | Neutrophil extracellular trap formation | SNORD21 |
| GeneCards | Neutrophil extracellular trap formation | ENPP5   |
| GeneCards | Neutrophil extracellular trap formation | SLC7A3  |
| GeneCards | Neutrophil extracellular trap formation | SSX2IP  |
| GeneCards | Neutrophil extracellular trap formation | KIF5A   |
| GeneCards | Neutrophil extracellular trap formation | CNRIP1  |
| GeneCards | Neutrophil extracellular trap formation | GRINA   |
| GeneCards | Neutrophil extracellular trap formation | BRCC3   |
| GeneCards | Neutrophil extracellular trap formation | MC5R    |
| GeneCards | Neutrophil extracellular trap formation | FTSJ1   |
| GeneCards | Neutrophil extracellular trap formation | PCNT    |

|           |                                         |         |
|-----------|-----------------------------------------|---------|
| GeneCards | Neutrophil extracellular trap formation | HMGN4   |
| GeneCards | Neutrophil extracellular trap formation | UBXN6   |
| GeneCards | Neutrophil extracellular trap formation | SLC29A3 |
| GeneCards | Neutrophil extracellular trap formation | UGT8    |
| GeneCards | Neutrophil extracellular trap formation | PFDN2   |
| GeneCards | Neutrophil extracellular trap formation | CCDC30  |
| GeneCards | Neutrophil extracellular trap formation | NDUFA12 |
| GeneCards | Neutrophil extracellular trap formation | CTBP1   |
| GeneCards | Neutrophil extracellular trap formation | HERPUD1 |
| GeneCards | Neutrophil extracellular trap formation | TSPYL1  |
| GeneCards | Neutrophil extracellular trap formation | GOLGB1  |
| GeneCards | Neutrophil extracellular trap formation | ZFP37   |
| GeneCards | Neutrophil extracellular trap formation | NOL11   |
| GeneCards | Neutrophil extracellular trap formation | ACSS1   |
| GeneCards | Neutrophil extracellular trap formation | FBXO3   |
| GeneCards | Neutrophil extracellular trap formation | PRAME   |
| GeneCards | Neutrophil extracellular trap formation | QDPR    |
| GeneCards | Neutrophil extracellular trap formation | PRPF40A |
| GeneCards | Neutrophil extracellular trap formation | GPRC5A  |
| GeneCards | Neutrophil extracellular trap formation | VPREB3  |
| GeneCards | Neutrophil extracellular trap formation | TAFA5   |
| GeneCards | Neutrophil extracellular trap formation | PTPN7   |



|           |                                         |                 |
|-----------|-----------------------------------------|-----------------|
| GeneCards | Neutrophil extracellular trap formation | IZUMO4          |
| GeneCards | Neutrophil extracellular trap formation | DHRS4L2         |
| GeneCards | Neutrophil extracellular trap formation | CLPP            |
| GeneCards | Neutrophil extracellular trap formation | TBCCD1          |
| GeneCards | Neutrophil extracellular trap formation | CD164L2         |
| GeneCards | Neutrophil extracellular trap formation | OTUD4           |
| GeneCards | Neutrophil extracellular trap formation | SCRG1           |
| GeneCards | Neutrophil extracellular trap formation | CUL9            |
| GeneCards | Neutrophil extracellular trap formation | ZNF646          |
| GeneCards | Neutrophil extracellular trap formation | ENSG00000280987 |
| GeneCards | Neutrophil extracellular trap formation | ZCCHC7          |
| GeneCards | Neutrophil extracellular trap formation | SFSWAP          |
| GeneCards | Neutrophil extracellular trap formation | ZNRF2           |
| GeneCards | Neutrophil extracellular trap formation | ZNF322          |
| GeneCards | Neutrophil extracellular trap formation | COX4I2          |
| GeneCards | Neutrophil extracellular trap formation | WASHC4          |
| GeneCards | Neutrophil extracellular trap formation | CD300LB         |
| GeneCards | Neutrophil extracellular trap formation | CCP110          |
| GeneCards | Neutrophil extracellular trap formation | RPL21           |
| GeneCards | Neutrophil extracellular trap formation | PPAT            |
| GeneCards | Neutrophil extracellular trap formation | MKRN3           |
| GeneCards | Neutrophil extracellular trap formation | TXNDC9          |

|           |                                         |          |
|-----------|-----------------------------------------|----------|
| GeneCards | Neutrophil extracellular trap formation | TNRC18   |
| GeneCards | Neutrophil extracellular trap formation | PRSS21   |
| GeneCards | Neutrophil extracellular trap formation | TTK      |
| GeneCards | Neutrophil extracellular trap formation | ZNF436   |
| GeneCards | Neutrophil extracellular trap formation | SEC11A   |
| GeneCards | Neutrophil extracellular trap formation | TDG      |
| GeneCards | Neutrophil extracellular trap formation | TTPA     |
| GeneCards | Neutrophil extracellular trap formation | USP16    |
| GeneCards | Neutrophil extracellular trap formation | EIF4E2   |
| GeneCards | Neutrophil extracellular trap formation | FEM1C    |
| GeneCards | Neutrophil extracellular trap formation | MPG      |
| GeneCards | Neutrophil extracellular trap formation | LYNX1    |
| GeneCards | Neutrophil extracellular trap formation | DHRS4    |
| GeneCards | Neutrophil extracellular trap formation | TMEM33   |
| GeneCards | Neutrophil extracellular trap formation | CAPRIN2  |
| GeneCards | Neutrophil extracellular trap formation | C11orf24 |
| GeneCards | Neutrophil extracellular trap formation | ABHD13   |
| GeneCards | Neutrophil extracellular trap formation | CYP26A1  |
| GeneCards | Neutrophil extracellular trap formation | FECH     |
| GeneCards | Neutrophil extracellular trap formation | ELAVL4   |
| GeneCards | Neutrophil extracellular trap formation | NT5C3A   |
| GeneCards | Neutrophil extracellular trap formation | THOC3    |

|           |                                         |           |
|-----------|-----------------------------------------|-----------|
| GeneCards | Neutrophil extracellular trap formation | MAPK1IP1L |
| GeneCards | Neutrophil extracellular trap formation | AQP8      |
| GeneCards | Neutrophil extracellular trap formation | PAFAH1B3  |
| GeneCards | Neutrophil extracellular trap formation | UIMC1     |
| GeneCards | Neutrophil extracellular trap formation | LMTK2     |
| GeneCards | Neutrophil extracellular trap formation | IQSEC2    |
| GeneCards | Neutrophil extracellular trap formation | HLA-L     |
| GeneCards | Neutrophil extracellular trap formation | GOLIM4    |
| GeneCards | Neutrophil extracellular trap formation | TMEM179B  |
| GeneCards | Neutrophil extracellular trap formation | NAA35     |
| GeneCards | Neutrophil extracellular trap formation | C1orf21   |
| GeneCards | Neutrophil extracellular trap formation | TFB1M     |
| GeneCards | Neutrophil extracellular trap formation | IL20RA    |
| GeneCards | Neutrophil extracellular trap formation | DHFR2     |
| GeneCards | Neutrophil extracellular trap formation | SELENOH   |
| GeneCards | Neutrophil extracellular trap formation | MIS12     |
| GeneCards | Neutrophil extracellular trap formation | ICMT      |
| GeneCards | Neutrophil extracellular trap formation | TMEM245   |
| GeneCards | Neutrophil extracellular trap formation | CHMP1B    |
| GeneCards | Neutrophil extracellular trap formation | CPT2      |
| GeneCards | Neutrophil extracellular trap formation | TK2       |
| GeneCards | Neutrophil extracellular trap formation | NSMAF     |

|           |                                         |           |
|-----------|-----------------------------------------|-----------|
| GeneCards | Neutrophil extracellular trap formation | CCNK      |
| GeneCards | Neutrophil extracellular trap formation | ERGIC2    |
| GeneCards | Neutrophil extracellular trap formation | NKX3-2    |
| GeneCards | Neutrophil extracellular trap formation | TOB2      |
| GeneCards | Neutrophil extracellular trap formation | NDUFB8    |
| GeneCards | Neutrophil extracellular trap formation | CMTR2     |
| GeneCards | Neutrophil extracellular trap formation | OSBPL3    |
| GeneCards | Neutrophil extracellular trap formation | NUS1      |
| GeneCards | Neutrophil extracellular trap formation | ESPL1     |
| GeneCards | Neutrophil extracellular trap formation | ARID4A    |
| GeneCards | Neutrophil extracellular trap formation | SLFN5     |
| GeneCards | Neutrophil extracellular trap formation | PRSS22    |
| GeneCards | Neutrophil extracellular trap formation | IFNA21    |
| GeneCards | Neutrophil extracellular trap formation | HGSNAT    |
| GeneCards | Neutrophil extracellular trap formation | PIAS4     |
| GeneCards | Neutrophil extracellular trap formation | FASTKD1   |
| GeneCards | Neutrophil extracellular trap formation | ZNF703    |
| GeneCards | Neutrophil extracellular trap formation | NDUFB10   |
| GeneCards | Neutrophil extracellular trap formation | C17orf75  |
| GeneCards | Neutrophil extracellular trap formation | HDAC10    |
| GeneCards | Neutrophil extracellular trap formation | CDHR4     |
| GeneCards | Neutrophil extracellular trap formation | POM121L9P |

|           |                                         |          |
|-----------|-----------------------------------------|----------|
| GeneCards | Neutrophil extracellular trap formation | CERS2    |
| GeneCards | Neutrophil extracellular trap formation | SERINC5  |
| GeneCards | Neutrophil extracellular trap formation | VTI1A    |
| GeneCards | Neutrophil extracellular trap formation | NDUFA4   |
| GeneCards | Neutrophil extracellular trap formation | NAP1L2   |
| GeneCards | Neutrophil extracellular trap formation | TMPRSS3  |
| GeneCards | Neutrophil extracellular trap formation | PSRC1    |
| GeneCards | Neutrophil extracellular trap formation | BCKDHA   |
| GeneCards | Neutrophil extracellular trap formation | CDC123   |
| GeneCards | Neutrophil extracellular trap formation | ATG2B    |
| GeneCards | Neutrophil extracellular trap formation | ZRANB2   |
| GeneCards | Neutrophil extracellular trap formation | FMO1     |
| GeneCards | Neutrophil extracellular trap formation | B4GALT4  |
| GeneCards | Neutrophil extracellular trap formation | SMIM20   |
| GeneCards | Neutrophil extracellular trap formation | AUTS2    |
| GeneCards | Neutrophil extracellular trap formation | AKR1C1   |
| GeneCards | Neutrophil extracellular trap formation | TMEM44   |
| GeneCards | Neutrophil extracellular trap formation | BRME1    |
| GeneCards | Neutrophil extracellular trap formation | ZWINT    |
| GeneCards | Neutrophil extracellular trap formation | ECE2     |
| GeneCards | Neutrophil extracellular trap formation | CES3     |
| GeneCards | Neutrophil extracellular trap formation | C20orf27 |

|           |                                         |          |
|-----------|-----------------------------------------|----------|
| GeneCards | Neutrophil extracellular trap formation | MANSC1   |
| GeneCards | Neutrophil extracellular trap formation | ACCS     |
| GeneCards | Neutrophil extracellular trap formation | PHOSPHO2 |
| GeneCards | Neutrophil extracellular trap formation | WDR74    |
| GeneCards | Neutrophil extracellular trap formation | PPP1R3F  |
| GeneCards | Neutrophil extracellular trap formation | SLC51A   |
| GeneCards | Neutrophil extracellular trap formation | NUCKS1   |
| GeneCards | Neutrophil extracellular trap formation | KCTD17   |
| GeneCards | Neutrophil extracellular trap formation | SART3    |
| GeneCards | Neutrophil extracellular trap formation | EARS2    |
| GeneCards | Neutrophil extracellular trap formation | IFT22    |
| GeneCards | Neutrophil extracellular trap formation | ARL6IP6  |
| GeneCards | Neutrophil extracellular trap formation | PANK4    |
| GeneCards | Neutrophil extracellular trap formation | IGSF11   |
| GeneCards | Neutrophil extracellular trap formation | ZNF189   |
| GeneCards | Neutrophil extracellular trap formation | ZNF660   |
| GeneCards | Neutrophil extracellular trap formation | TTC21A   |
| GeneCards | Neutrophil extracellular trap formation | VRK2     |
| GeneCards | Neutrophil extracellular trap formation | HSPB11   |
| GeneCards | Neutrophil extracellular trap formation | CYP2C19  |
| GeneCards | Neutrophil extracellular trap formation | ZSCAN26  |
| GeneCards | Neutrophil extracellular trap formation | UPP1     |

|           |                                         |         |
|-----------|-----------------------------------------|---------|
| GeneCards | Neutrophil extracellular trap formation | RASSF6  |
| GeneCards | Neutrophil extracellular trap formation | PCSK4   |
| GeneCards | Neutrophil extracellular trap formation | EIF3C   |
| GeneCards | Neutrophil extracellular trap formation | UBE2R2  |
| GeneCards | Neutrophil extracellular trap formation | PRKAG1  |
| GeneCards | Neutrophil extracellular trap formation | GPAT4   |
| GeneCards | Neutrophil extracellular trap formation | TIMMDC1 |
| GeneCards | Neutrophil extracellular trap formation | CDC23   |
| GeneCards | Neutrophil extracellular trap formation | STX1B   |
| GeneCards | Neutrophil extracellular trap formation | PIGP    |
| GeneCards | Neutrophil extracellular trap formation | CHCHD5  |
| GeneCards | Neutrophil extracellular trap formation | WDR36   |
| GeneCards | Neutrophil extracellular trap formation | CRYZL1  |
| GeneCards | Neutrophil extracellular trap formation | LRRC3   |
| GeneCards | Neutrophil extracellular trap formation | TMED6   |
| GeneCards | Neutrophil extracellular trap formation | SUMO3   |
| GeneCards | Neutrophil extracellular trap formation | ITPRIP  |
| GeneCards | Neutrophil extracellular trap formation | VPS37A  |
| GeneCards | Neutrophil extracellular trap formation | ARID3A  |
| GeneCards | Neutrophil extracellular trap formation | ZNF74   |
| GeneCards | Neutrophil extracellular trap formation | ZMYM2   |
| GeneCards | Neutrophil extracellular trap formation | NCALD   |

|           |                                         |         |
|-----------|-----------------------------------------|---------|
| GeneCards | Neutrophil extracellular trap formation | KCTD15  |
| GeneCards | Neutrophil extracellular trap formation | MIOS    |
| GeneCards | Neutrophil extracellular trap formation | GPRIN1  |
| GeneCards | Neutrophil extracellular trap formation | POLE4   |
| GeneCards | Neutrophil extracellular trap formation | ATP10D  |
| GeneCards | Neutrophil extracellular trap formation | SMOX    |
| GeneCards | Neutrophil extracellular trap formation | TWNK    |
| GeneCards | Neutrophil extracellular trap formation | SAV1    |
| GeneCards | Neutrophil extracellular trap formation | NDUFB4  |
| GeneCards | Neutrophil extracellular trap formation | HOXB7   |
| GeneCards | Neutrophil extracellular trap formation | RNF10   |
| GeneCards | Neutrophil extracellular trap formation | NCAPG2  |
| GeneCards | Neutrophil extracellular trap formation | KIF22   |
| GeneCards | Neutrophil extracellular trap formation | DCTN5   |
| GeneCards | Neutrophil extracellular trap formation | RBAK    |
| GeneCards | Neutrophil extracellular trap formation | PRR16   |
| GeneCards | Neutrophil extracellular trap formation | ZBTB2   |
| GeneCards | Neutrophil extracellular trap formation | UBA6    |
| GeneCards | Neutrophil extracellular trap formation | TTBK2   |
| GeneCards | Neutrophil extracellular trap formation | TMEM199 |
| GeneCards | Neutrophil extracellular trap formation | ALX4    |
| GeneCards | Neutrophil extracellular trap formation | ICE2    |



|           |                                         |          |
|-----------|-----------------------------------------|----------|
| GeneCards | Neutrophil extracellular trap formation | ZBTB5    |
| GeneCards | Neutrophil extracellular trap formation | SIKE1    |
| GeneCards | Neutrophil extracellular trap formation | FBXO45   |
| GeneCards | Neutrophil extracellular trap formation | NUTM2A   |
| GeneCards | Neutrophil extracellular trap formation | SLC25A32 |
| GeneCards | Neutrophil extracellular trap formation | HECTD3   |
| GeneCards | Neutrophil extracellular trap formation | OBI1     |
| GeneCards | Neutrophil extracellular trap formation | PDC      |
| GeneCards | Neutrophil extracellular trap formation | SLC37A1  |
| GeneCards | Neutrophil extracellular trap formation | RPL36    |
| GeneCards | Neutrophil extracellular trap formation | FAM76B   |
| GeneCards | Neutrophil extracellular trap formation | ZNF525   |
| GeneCards | Neutrophil extracellular trap formation | MCFD2    |
| GeneCards | Neutrophil extracellular trap formation | FER1L5   |
| GeneCards | Neutrophil extracellular trap formation | ARL6IP4  |
| GeneCards | Neutrophil extracellular trap formation | UQCRC2   |
| GeneCards | Neutrophil extracellular trap formation | PARS2    |
| GeneCards | Neutrophil extracellular trap formation | VTA1     |
| GeneCards | Neutrophil extracellular trap formation | CLDN14   |
| GeneCards | Neutrophil extracellular trap formation | SPC24    |
| GeneCards | Neutrophil extracellular trap formation | FKBP7    |
| GeneCards | Neutrophil extracellular trap formation | INTS1    |

|           |                                         |          |
|-----------|-----------------------------------------|----------|
| GeneCards | Neutrophil extracellular trap formation | MRPS16   |
| GeneCards | Neutrophil extracellular trap formation | TRPM8    |
| GeneCards | Neutrophil extracellular trap formation | HTATIP2  |
| GeneCards | Neutrophil extracellular trap formation | CLCN1    |
| GeneCards | Neutrophil extracellular trap formation | CCDC8    |
| GeneCards | Neutrophil extracellular trap formation | H1-5     |
| GeneCards | Neutrophil extracellular trap formation | HEXIM1   |
| GeneCards | Neutrophil extracellular trap formation | ACADSB   |
| GeneCards | Neutrophil extracellular trap formation | FOXC2    |
| GeneCards | Neutrophil extracellular trap formation | CLTA     |
| GeneCards | Neutrophil extracellular trap formation | AKR1C3   |
| GeneCards | Neutrophil extracellular trap formation | PTPN4    |
| GeneCards | Neutrophil extracellular trap formation | MAP6     |
| GeneCards | Neutrophil extracellular trap formation | CLDN12   |
| GeneCards | Neutrophil extracellular trap formation | HS3ST2   |
| GeneCards | Neutrophil extracellular trap formation | ZNF768   |
| GeneCards | Neutrophil extracellular trap formation | LAYN     |
| GeneCards | Neutrophil extracellular trap formation | PDZRN3   |
| GeneCards | Neutrophil extracellular trap formation | APOBEC3B |
| GeneCards | Neutrophil extracellular trap formation | FARSA    |
| GeneCards | Neutrophil extracellular trap formation | EEF1A2   |
| GeneCards | Neutrophil extracellular trap formation | NOL4     |

|           |                                         |          |
|-----------|-----------------------------------------|----------|
| GeneCards | Neutrophil extracellular trap formation | KCNH1    |
| GeneCards | Neutrophil extracellular trap formation | FAM162A  |
| GeneCards | Neutrophil extracellular trap formation | TTC17    |
| GeneCards | Neutrophil extracellular trap formation | KRT2     |
| GeneCards | Neutrophil extracellular trap formation | EPGN     |
| GeneCards | Neutrophil extracellular trap formation | TSPYL2   |
| GeneCards | Neutrophil extracellular trap formation | HMGB3    |
| GeneCards | Neutrophil extracellular trap formation | LCMT1    |
| GeneCards | Neutrophil extracellular trap formation | TMEM267  |
| GeneCards | Neutrophil extracellular trap formation | RAB36    |
| GeneCards | Neutrophil extracellular trap formation | TMED5    |
| GeneCards | Neutrophil extracellular trap formation | SEPSECS  |
| GeneCards | Neutrophil extracellular trap formation | ARMCX3   |
| GeneCards | Neutrophil extracellular trap formation | RRP1     |
| GeneCards | Neutrophil extracellular trap formation | ZSCAN5A  |
| GeneCards | Neutrophil extracellular trap formation | SIT1     |
| GeneCards | Neutrophil extracellular trap formation | SLC25A19 |
| GeneCards | Neutrophil extracellular trap formation | DENND4C  |
| GeneCards | Neutrophil extracellular trap formation | PRSS27   |
| GeneCards | Neutrophil extracellular trap formation | HIKESHI  |
| GeneCards | Neutrophil extracellular trap formation | SGO2     |
| GeneCards | Neutrophil extracellular trap formation | AP1G1    |

|           |                                         |            |
|-----------|-----------------------------------------|------------|
| GeneCards | Neutrophil extracellular trap formation | ACYP2      |
| GeneCards | Neutrophil extracellular trap formation | USO1       |
| GeneCards | Neutrophil extracellular trap formation | SHROOM2    |
| GeneCards | Neutrophil extracellular trap formation | CENPA      |
| GeneCards | Neutrophil extracellular trap formation | MTREX      |
| GeneCards | Neutrophil extracellular trap formation | VIL1       |
| GeneCards | Neutrophil extracellular trap formation | PPP1R14A   |
| GeneCards | Neutrophil extracellular trap formation | TMEM204    |
| GeneCards | Neutrophil extracellular trap formation | MRPL57     |
| GeneCards | Neutrophil extracellular trap formation | CRYBB2     |
| GeneCards | Neutrophil extracellular trap formation | RSRC1      |
| GeneCards | Neutrophil extracellular trap formation | ALKBH1     |
| GeneCards | Neutrophil extracellular trap formation | TREML2     |
| GeneCards | Neutrophil extracellular trap formation | MCUB       |
| GeneCards | Neutrophil extracellular trap formation | UQCR10     |
| GeneCards | Neutrophil extracellular trap formation | SNF8       |
| GeneCards | Neutrophil extracellular trap formation | TMTC2      |
| GeneCards | Neutrophil extracellular trap formation | ST6GALNAC1 |
| GeneCards | Neutrophil extracellular trap formation | ALX1       |
| GeneCards | Neutrophil extracellular trap formation | OASL       |
| GeneCards | Neutrophil extracellular trap formation | SLC22A15   |
| GeneCards | Neutrophil extracellular trap formation | RAB4B      |

|           |                                         |          |
|-----------|-----------------------------------------|----------|
| GeneCards | Neutrophil extracellular trap formation | NKX2-2   |
| GeneCards | Neutrophil extracellular trap formation | VPS18    |
| GeneCards | Neutrophil extracellular trap formation | SCN7A    |
| GeneCards | Neutrophil extracellular trap formation | YIF1B    |
| GeneCards | Neutrophil extracellular trap formation | POLR2I   |
| GeneCards | Neutrophil extracellular trap formation | ZNF671   |
| GeneCards | Neutrophil extracellular trap formation | PPP2R5C  |
| GeneCards | Neutrophil extracellular trap formation | PDX1     |
| GeneCards | Neutrophil extracellular trap formation | ZNF460   |
| GeneCards | Neutrophil extracellular trap formation | ELMO2    |
| GeneCards | Neutrophil extracellular trap formation | KBTBD8   |
| GeneCards | Neutrophil extracellular trap formation | PRC1     |
| GeneCards | Neutrophil extracellular trap formation | DDRGK1   |
| GeneCards | Neutrophil extracellular trap formation | FAM167A  |
| GeneCards | Neutrophil extracellular trap formation | SLC39A13 |
| GeneCards | Neutrophil extracellular trap formation | USE1     |
| GeneCards | Neutrophil extracellular trap formation | C21orf91 |
| GeneCards | Neutrophil extracellular trap formation | DTX3     |
| GeneCards | Neutrophil extracellular trap formation | TREX1    |
| GeneCards | Neutrophil extracellular trap formation | PIWIL4   |
| GeneCards | Neutrophil extracellular trap formation | LYSMD4   |
| GeneCards | Neutrophil extracellular trap formation | BRD8     |

|           |                                         |          |
|-----------|-----------------------------------------|----------|
| GeneCards | Neutrophil extracellular trap formation | PPP2R2C  |
| GeneCards | Neutrophil extracellular trap formation | LRRC7    |
| GeneCards | Neutrophil extracellular trap formation | BORA     |
| GeneCards | Neutrophil extracellular trap formation | NCAPG    |
| GeneCards | Neutrophil extracellular trap formation | TIMM17B  |
| GeneCards | Neutrophil extracellular trap formation | TNS4     |
| GeneCards | Neutrophil extracellular trap formation | CCDC136  |
| GeneCards | Neutrophil extracellular trap formation | SOCS7    |
| GeneCards | Neutrophil extracellular trap formation | MTUS2    |
| GeneCards | Neutrophil extracellular trap formation | ODF1     |
| GeneCards | Neutrophil extracellular trap formation | SREK1IP1 |
| GeneCards | Neutrophil extracellular trap formation | HJURP    |
| GeneCards | Neutrophil extracellular trap formation | EYA2     |
| GeneCards | Neutrophil extracellular trap formation | MMGT1    |
| GeneCards | Neutrophil extracellular trap formation | MAB21L1  |
| GeneCards | Neutrophil extracellular trap formation | DBF4B    |
| GeneCards | Neutrophil extracellular trap formation | TAS2R14  |
| GeneCards | Neutrophil extracellular trap formation | EMC4     |
| GeneCards | Neutrophil extracellular trap formation | ZNF581   |
| GeneCards | Neutrophil extracellular trap formation | SPTLC3   |
| GeneCards | Neutrophil extracellular trap formation | PCID2    |
| GeneCards | Neutrophil extracellular trap formation | MSX1     |

|           |                                         |          |
|-----------|-----------------------------------------|----------|
| GeneCards | Neutrophil extracellular trap formation | CENPC    |
| GeneCards | Neutrophil extracellular trap formation | IGSF3    |
| GeneCards | Neutrophil extracellular trap formation | NIM1K    |
| GeneCards | Neutrophil extracellular trap formation | MAML2    |
| GeneCards | Neutrophil extracellular trap formation | RGS18    |
| GeneCards | Neutrophil extracellular trap formation | CIB2     |
| GeneCards | Neutrophil extracellular trap formation | NHLRC1   |
| GeneCards | Neutrophil extracellular trap formation | ELP2     |
| GeneCards | Neutrophil extracellular trap formation | GPAT3    |
| GeneCards | Neutrophil extracellular trap formation | GPRASP2  |
| GeneCards | Neutrophil extracellular trap formation | GPATCH2  |
| GeneCards | Neutrophil extracellular trap formation | MAIP1    |
| GeneCards | Neutrophil extracellular trap formation | DDA1     |
| GeneCards | Neutrophil extracellular trap formation | INSL5    |
| GeneCards | Neutrophil extracellular trap formation | CTTNBP2  |
| GeneCards | Neutrophil extracellular trap formation | ZNF502   |
| GeneCards | Neutrophil extracellular trap formation | ADAM33   |
| GeneCards | Neutrophil extracellular trap formation | NAALAD2  |
| GeneCards | Neutrophil extracellular trap formation | COX7A2   |
| GeneCards | Neutrophil extracellular trap formation | CASP8AP2 |
| GeneCards | Neutrophil extracellular trap formation | CASP12   |
| GeneCards | Neutrophil extracellular trap formation | GJD2     |

|           |                                         |          |
|-----------|-----------------------------------------|----------|
| GeneCards | Neutrophil extracellular trap formation | PTF1A    |
| GeneCards | Neutrophil extracellular trap formation | ANKRD6   |
| GeneCards | Neutrophil extracellular trap formation | TOMM34   |
| GeneCards | Neutrophil extracellular trap formation | DPY19L1  |
| GeneCards | Neutrophil extracellular trap formation | GAN      |
| GeneCards | Neutrophil extracellular trap formation | GOLM2    |
| GeneCards | Neutrophil extracellular trap formation | HMGXB4   |
| GeneCards | Neutrophil extracellular trap formation | SCN2A    |
| GeneCards | Neutrophil extracellular trap formation | STRBP    |
| GeneCards | Neutrophil extracellular trap formation | PHYHIPL  |
| GeneCards | Neutrophil extracellular trap formation | ZBED3    |
| GeneCards | Neutrophil extracellular trap formation | SPG21    |
| GeneCards | Neutrophil extracellular trap formation | TRIM62   |
| GeneCards | Neutrophil extracellular trap formation | NKD2     |
| GeneCards | Neutrophil extracellular trap formation | H1-1     |
| GeneCards | Neutrophil extracellular trap formation | EDDM3B   |
| GeneCards | Neutrophil extracellular trap formation | MAGED1   |
| GeneCards | Neutrophil extracellular trap formation | ANKRD13A |
| GeneCards | Neutrophil extracellular trap formation | AMACR    |
| GeneCards | Neutrophil extracellular trap formation | FKBP11   |
| GeneCards | Neutrophil extracellular trap formation | GLIS3    |
| GeneCards | Neutrophil extracellular trap formation | POLR3A   |



|           |                                         |         |
|-----------|-----------------------------------------|---------|
| GeneCards | Neutrophil extracellular trap formation | MIB2    |
| GeneCards | Neutrophil extracellular trap formation | GDE1    |
| GeneCards | Neutrophil extracellular trap formation | FIBCD1  |
| GeneCards | Neutrophil extracellular trap formation | PROM2   |
| GeneCards | Neutrophil extracellular trap formation | PHLDA2  |
| GeneCards | Neutrophil extracellular trap formation | DNTTIP2 |
| GeneCards | Neutrophil extracellular trap formation | SHCBP1L |
| GeneCards | Neutrophil extracellular trap formation | SULT1E1 |
| GeneCards | Neutrophil extracellular trap formation | FOXN1   |
| GeneCards | Neutrophil extracellular trap formation | HUS1    |
| GeneCards | Neutrophil extracellular trap formation | RBBP6   |
| GeneCards | Neutrophil extracellular trap formation | ACOT8   |
| GeneCards | Neutrophil extracellular trap formation | FCF1    |
| GeneCards | Neutrophil extracellular trap formation | NAA60   |
| GeneCards | Neutrophil extracellular trap formation | KATNAL2 |
| GeneCards | Neutrophil extracellular trap formation | ERGIC1  |
| GeneCards | Neutrophil extracellular trap formation | ZNF597  |
| GeneCards | Neutrophil extracellular trap formation | CCDC138 |
| GeneCards | Neutrophil extracellular trap formation | TRDMT1  |
| GeneCards | Neutrophil extracellular trap formation | UBR7    |
| GeneCards | Neutrophil extracellular trap formation | NEIL3   |
| GeneCards | Neutrophil extracellular trap formation | CFAP44  |

|           |                                         |          |
|-----------|-----------------------------------------|----------|
| GeneCards | Neutrophil extracellular trap formation | NAGS     |
| GeneCards | Neutrophil extracellular trap formation | WDR5B    |
| GeneCards | Neutrophil extracellular trap formation | UBALD2   |
| GeneCards | Neutrophil extracellular trap formation | CYTL1    |
| GeneCards | Neutrophil extracellular trap formation | SCO1     |
| GeneCards | Neutrophil extracellular trap formation | MTMR14   |
| GeneCards | Neutrophil extracellular trap formation | COX20    |
| GeneCards | Neutrophil extracellular trap formation | CNOT11   |
| GeneCards | Neutrophil extracellular trap formation | TRAM1    |
| GeneCards | Neutrophil extracellular trap formation | ZNF12    |
| GeneCards | Neutrophil extracellular trap formation | PLP2     |
| GeneCards | Neutrophil extracellular trap formation | GSTZ1    |
| GeneCards | Neutrophil extracellular trap formation | IGSF9    |
| GeneCards | Neutrophil extracellular trap formation | UQCC1    |
| GeneCards | Neutrophil extracellular trap formation | TRIM41   |
| GeneCards | Neutrophil extracellular trap formation | KCTD21   |
| GeneCards | Neutrophil extracellular trap formation | TVP23B   |
| GeneCards | Neutrophil extracellular trap formation | TRIM73   |
| GeneCards | Neutrophil extracellular trap formation | SHISAL2A |
| GeneCards | Neutrophil extracellular trap formation | ESYT1    |
| GeneCards | Neutrophil extracellular trap formation | SERPINB4 |
| GeneCards | Neutrophil extracellular trap formation | SLIRP    |

|           |                                         |          |
|-----------|-----------------------------------------|----------|
| GeneCards | Neutrophil extracellular trap formation | CST4     |
| GeneCards | Neutrophil extracellular trap formation | AGXT     |
| GeneCards | Neutrophil extracellular trap formation | TIMM9    |
| GeneCards | Neutrophil extracellular trap formation | KIF1A    |
| GeneCards | Neutrophil extracellular trap formation | DLGAP5   |
| GeneCards | Neutrophil extracellular trap formation | ILVBL    |
| GeneCards | Neutrophil extracellular trap formation | GTPBP6   |
| GeneCards | Neutrophil extracellular trap formation | DNAAF1   |
| GeneCards | Neutrophil extracellular trap formation | PIAS2    |
| GeneCards | Neutrophil extracellular trap formation | JPT1     |
| GeneCards | Neutrophil extracellular trap formation | SLURP2   |
| GeneCards | Neutrophil extracellular trap formation | CIP2A    |
| GeneCards | Neutrophil extracellular trap formation | TMED1    |
| GeneCards | Neutrophil extracellular trap formation | TACC2    |
| GeneCards | Neutrophil extracellular trap formation | TMEM107  |
| GeneCards | Neutrophil extracellular trap formation | POLL     |
| GeneCards | Neutrophil extracellular trap formation | ABRAXAS1 |
| GeneCards | Neutrophil extracellular trap formation | TEX10    |
| GeneCards | Neutrophil extracellular trap formation | ZNF470   |
| GeneCards | Neutrophil extracellular trap formation | FAAP24   |
| GeneCards | Neutrophil extracellular trap formation | CST9L    |
| GeneCards | Neutrophil extracellular trap formation | IGFL2    |

|           |                                         |           |
|-----------|-----------------------------------------|-----------|
| GeneCards | Neutrophil extracellular trap formation | TMPRSS11E |
| GeneCards | Neutrophil extracellular trap formation | ZNF467    |
| GeneCards | Neutrophil extracellular trap formation | TSPAN12   |
| GeneCards | Neutrophil extracellular trap formation | GFRA3     |
| GeneCards | Neutrophil extracellular trap formation | SOX8      |
| GeneCards | Neutrophil extracellular trap formation | TSPAN9    |
| GeneCards | Neutrophil extracellular trap formation | ENOPH1    |
| GeneCards | Neutrophil extracellular trap formation | AMIGO3    |
| GeneCards | Neutrophil extracellular trap formation | STRIP2    |
| GeneCards | Neutrophil extracellular trap formation | BRSK1     |
| GeneCards | Neutrophil extracellular trap formation | EPB41L1   |
| GeneCards | Neutrophil extracellular trap formation | OBSL1     |
| GeneCards | Neutrophil extracellular trap formation | MPDZ      |
| GeneCards | Neutrophil extracellular trap formation | PLK3      |
| GeneCards | Neutrophil extracellular trap formation | SERF2     |
| GeneCards | Neutrophil extracellular trap formation | TRPM4     |
| GeneCards | Neutrophil extracellular trap formation | EDAR      |
| GeneCards | Neutrophil extracellular trap formation | MCRS1     |
| GeneCards | Neutrophil extracellular trap formation | SNRPF     |
| GeneCards | Neutrophil extracellular trap formation | GNPAT     |
| GeneCards | Neutrophil extracellular trap formation | FN3K      |
| GeneCards | Neutrophil extracellular trap formation | LRRN4CL   |

|           |                                         |          |
|-----------|-----------------------------------------|----------|
| GeneCards | Neutrophil extracellular trap formation | IPP      |
| GeneCards | Neutrophil extracellular trap formation | GNAT1    |
| GeneCards | Neutrophil extracellular trap formation | POU1F1   |
| GeneCards | Neutrophil extracellular trap formation | MYO1H    |
| GeneCards | Neutrophil extracellular trap formation | ZNF468   |
| GeneCards | Neutrophil extracellular trap formation | ZNF584   |
| GeneCards | Neutrophil extracellular trap formation | ZNF587B  |
| GeneCards | Neutrophil extracellular trap formation | TMED2    |
| GeneCards | Neutrophil extracellular trap formation | MRPS24   |
| GeneCards | Neutrophil extracellular trap formation | SCIMP    |
| GeneCards | Neutrophil extracellular trap formation | TOMM20L  |
| GeneCards | Neutrophil extracellular trap formation | EGLN2    |
| GeneCards | Neutrophil extracellular trap formation | BET1     |
| GeneCards | Neutrophil extracellular trap formation | CD300LG  |
| GeneCards | Neutrophil extracellular trap formation | NEMF     |
| GeneCards | Neutrophil extracellular trap formation | KAZN     |
| GeneCards | Neutrophil extracellular trap formation | HAUS7    |
| GeneCards | Neutrophil extracellular trap formation | CD96     |
| GeneCards | Neutrophil extracellular trap formation | CAMLG    |
| GeneCards | Neutrophil extracellular trap formation | EXO1     |
| GeneCards | Neutrophil extracellular trap formation | TFAP4    |
| GeneCards | Neutrophil extracellular trap formation | SLC30A10 |

|           |                                         |         |
|-----------|-----------------------------------------|---------|
| GeneCards | Neutrophil extracellular trap formation | ACO2    |
| GeneCards | Neutrophil extracellular trap formation | MYO1A   |
| GeneCards | Neutrophil extracellular trap formation | POU3F3  |
| GeneCards | Neutrophil extracellular trap formation | DHX37   |
| GeneCards | Neutrophil extracellular trap formation | SLC49A3 |
| GeneCards | Neutrophil extracellular trap formation | GLUD2   |
| GeneCards | Neutrophil extracellular trap formation | INSIG1  |
| GeneCards | Neutrophil extracellular trap formation | SLC27A5 |
| GeneCards | Neutrophil extracellular trap formation | MNS1    |
| GeneCards | Neutrophil extracellular trap formation | NMRK1   |
| GeneCards | Neutrophil extracellular trap formation | PDE6D   |
| GeneCards | Neutrophil extracellular trap formation | CHMP4C  |
| GeneCards | Neutrophil extracellular trap formation | DTYMK   |
| GeneCards | Neutrophil extracellular trap formation | RPL17   |
| GeneCards | Neutrophil extracellular trap formation | TRIM27  |
| GeneCards | Neutrophil extracellular trap formation | DHRS3   |
| GeneCards | Neutrophil extracellular trap formation | UBD     |
| GeneCards | Neutrophil extracellular trap formation | TFE3    |
| GeneCards | Neutrophil extracellular trap formation | FXN     |
| GeneCards | Neutrophil extracellular trap formation | KCNK17  |
| GeneCards | Neutrophil extracellular trap formation | KCTD10  |
| GeneCards | Neutrophil extracellular trap formation | MRPL37  |

|           |                                         |          |
|-----------|-----------------------------------------|----------|
| GeneCards | Neutrophil extracellular trap formation | HIGD2A   |
| GeneCards | Neutrophil extracellular trap formation | TMEM167A |
| GeneCards | Neutrophil extracellular trap formation | MCC      |
| GeneCards | Neutrophil extracellular trap formation | MCCC2    |
| GeneCards | Neutrophil extracellular trap formation | SLC4A8   |
| GeneCards | Neutrophil extracellular trap formation | GRAMD1C  |
| GeneCards | Neutrophil extracellular trap formation | RUSF1    |
| GeneCards | Neutrophil extracellular trap formation | ERO1B    |
| GeneCards | Neutrophil extracellular trap formation | UBE2E2   |
| GeneCards | Neutrophil extracellular trap formation | NCAPH2   |
| GeneCards | Neutrophil extracellular trap formation | GHITM    |
| GeneCards | Neutrophil extracellular trap formation | TMED3    |
| GeneCards | Neutrophil extracellular trap formation | ZNF219   |
| GeneCards | Neutrophil extracellular trap formation | NDST3    |
| GeneCards | Neutrophil extracellular trap formation | SET      |
| GeneCards | Neutrophil extracellular trap formation | BCKDK    |
| GeneCards | Neutrophil extracellular trap formation | JPH1     |
| GeneCards | Neutrophil extracellular trap formation | PCF11    |
| GeneCards | Neutrophil extracellular trap formation | ZNF462   |
| GeneCards | Neutrophil extracellular trap formation | LAPTM4A  |
| GeneCards | Neutrophil extracellular trap formation | INTS5    |
| GeneCards | Neutrophil extracellular trap formation | ZNF512   |

|           |                                         |         |
|-----------|-----------------------------------------|---------|
| GeneCards | Neutrophil extracellular trap formation | LDAH    |
| GeneCards | Neutrophil extracellular trap formation | CADM2   |
| GeneCards | Neutrophil extracellular trap formation | ANO5    |
| GeneCards | Neutrophil extracellular trap formation | DCBLD2  |
| GeneCards | Neutrophil extracellular trap formation | PDK3    |
| GeneCards | Neutrophil extracellular trap formation | DTX1    |
| GeneCards | Neutrophil extracellular trap formation | PIGO    |
| GeneCards | Neutrophil extracellular trap formation | CARD18  |
| GeneCards | Neutrophil extracellular trap formation | SMARCC1 |
| GeneCards | Neutrophil extracellular trap formation | SNRPD1  |
| GeneCards | Neutrophil extracellular trap formation | NDUFAF3 |
| GeneCards | Neutrophil extracellular trap formation | GPSM1   |
| GeneCards | Neutrophil extracellular trap formation | PRR7    |
| GeneCards | Neutrophil extracellular trap formation | RAB35   |
| GeneCards | Neutrophil extracellular trap formation | SYT14   |
| GeneCards | Neutrophil extracellular trap formation | CASP14  |
| GeneCards | Neutrophil extracellular trap formation | GRB14   |
| GeneCards | Neutrophil extracellular trap formation | SLC39A6 |
| GeneCards | Neutrophil extracellular trap formation | NDUFS7  |
| GeneCards | Neutrophil extracellular trap formation | UQCRC1  |
| GeneCards | Neutrophil extracellular trap formation | ATAD2   |
| GeneCards | Neutrophil extracellular trap formation | ATP2A1  |



|           |                                         |         |
|-----------|-----------------------------------------|---------|
| GeneCards | Neutrophil extracellular trap formation | HIRA    |
| GeneCards | Neutrophil extracellular trap formation | ATP8B1  |
| GeneCards | Neutrophil extracellular trap formation | MRPL23  |
| GeneCards | Neutrophil extracellular trap formation | POP4    |
| GeneCards | Neutrophil extracellular trap formation | GMNN    |
| GeneCards | Neutrophil extracellular trap formation | LCORL   |
| GeneCards | Neutrophil extracellular trap formation | KDSR    |
| GeneCards | Neutrophil extracellular trap formation | SELENOS |
| GeneCards | Neutrophil extracellular trap formation | SHISA4  |
| GeneCards | Neutrophil extracellular trap formation | ZNF106  |
| GeneCards | Neutrophil extracellular trap formation | PITHD1  |
| GeneCards | Neutrophil extracellular trap formation | SOX3    |
| GeneCards | Neutrophil extracellular trap formation | RGS8    |
| GeneCards | Neutrophil extracellular trap formation | UBQLN2  |
| GeneCards | Neutrophil extracellular trap formation | MTMR9   |
| GeneCards | Neutrophil extracellular trap formation | CHST9   |
| GeneCards | Neutrophil extracellular trap formation | SHOX    |
| GeneCards | Neutrophil extracellular trap formation | NDUFB6  |
| GeneCards | Neutrophil extracellular trap formation | ZNF362  |
| GeneCards | Neutrophil extracellular trap formation | AFG1L   |
| GeneCards | Neutrophil extracellular trap formation | TIMM8A  |
| GeneCards | Neutrophil extracellular trap formation | CLEC2A  |

|           |                                         |         |
|-----------|-----------------------------------------|---------|
| GeneCards | Neutrophil extracellular trap formation | MPDU1   |
| GeneCards | Neutrophil extracellular trap formation | FRMD6   |
| GeneCards | Neutrophil extracellular trap formation | ADAT3   |
| GeneCards | Neutrophil extracellular trap formation | LPXN    |
| GeneCards | Neutrophil extracellular trap formation | RWDD4   |
| GeneCards | Neutrophil extracellular trap formation | CWC27   |
| GeneCards | Neutrophil extracellular trap formation | ONECUT2 |
| GeneCards | Neutrophil extracellular trap formation | PRPF4B  |
| GeneCards | Neutrophil extracellular trap formation | XPO7    |
| GeneCards | Neutrophil extracellular trap formation | KCNQ2   |
| GeneCards | Neutrophil extracellular trap formation | MAP3K21 |
| GeneCards | Neutrophil extracellular trap formation | DLAT    |
| GeneCards | Neutrophil extracellular trap formation | SH2D3A  |
| GeneCards | Neutrophil extracellular trap formation | SPATS2L |
| GeneCards | Neutrophil extracellular trap formation | DHDH    |
| GeneCards | Neutrophil extracellular trap formation | RAG2    |
| GeneCards | Neutrophil extracellular trap formation | RABGGTB |
| GeneCards | Neutrophil extracellular trap formation | PDXP    |
| GeneCards | Neutrophil extracellular trap formation | TAF7    |
| GeneCards | Neutrophil extracellular trap formation | PGAP1   |
| GeneCards | Neutrophil extracellular trap formation | PLD4    |
| GeneCards | Neutrophil extracellular trap formation | LCTL    |

|           |                                         |         |
|-----------|-----------------------------------------|---------|
| GeneCards | Neutrophil extracellular trap formation | COMTD1  |
| GeneCards | Neutrophil extracellular trap formation | ZMYND11 |
| GeneCards | Neutrophil extracellular trap formation | DAZL    |
| GeneCards | Neutrophil extracellular trap formation | C8orf44 |
| GeneCards | Neutrophil extracellular trap formation | ZNF263  |
| GeneCards | Neutrophil extracellular trap formation | TMEM65  |
| GeneCards | Neutrophil extracellular trap formation | ZBTB49  |
| GeneCards | Neutrophil extracellular trap formation | ZNF765  |
| GeneCards | Neutrophil extracellular trap formation | IFNK    |
| GeneCards | Neutrophil extracellular trap formation | IGFL3   |
| GeneCards | Neutrophil extracellular trap formation | PLRG1   |
| GeneCards | Neutrophil extracellular trap formation | ASPM    |
| GeneCards | Neutrophil extracellular trap formation | BCKDHB  |
| GeneCards | Neutrophil extracellular trap formation | BFSP1   |
| GeneCards | Neutrophil extracellular trap formation | ATL1    |
| GeneCards | Neutrophil extracellular trap formation | EPN1    |
| GeneCards | Neutrophil extracellular trap formation | FAM53C  |
| GeneCards | Neutrophil extracellular trap formation | SUCLG2  |
| GeneCards | Neutrophil extracellular trap formation | SEH1L   |
| GeneCards | Neutrophil extracellular trap formation | TIPRL   |
| GeneCards | Neutrophil extracellular trap formation | DCAF16  |
| GeneCards | Neutrophil extracellular trap formation | ATP13A4 |

|           |                                         |         |
|-----------|-----------------------------------------|---------|
| GeneCards | Neutrophil extracellular trap formation | NANOS1  |
| GeneCards | Neutrophil extracellular trap formation | USP38   |
| GeneCards | Neutrophil extracellular trap formation | DIRC3   |
| GeneCards | Neutrophil extracellular trap formation | LRRC40  |
| GeneCards | Neutrophil extracellular trap formation | SLC8A3  |
| GeneCards | Neutrophil extracellular trap formation | GZF1    |
| GeneCards | Neutrophil extracellular trap formation | ODR4    |
| GeneCards | Neutrophil extracellular trap formation | LSM5    |
| GeneCards | Neutrophil extracellular trap formation | KCTD3   |
| GeneCards | Neutrophil extracellular trap formation | DCTN6   |
| GeneCards | Neutrophil extracellular trap formation | QRFPR   |
| GeneCards | Neutrophil extracellular trap formation | ZDHHC22 |
| GeneCards | Neutrophil extracellular trap formation | NNT     |
| GeneCards | Neutrophil extracellular trap formation | PNPLA3  |
| GeneCards | Neutrophil extracellular trap formation | PRAF2   |
| GeneCards | Neutrophil extracellular trap formation | AIP     |
| GeneCards | Neutrophil extracellular trap formation | FHOD1   |
| GeneCards | Neutrophil extracellular trap formation | PPP1R3C |
| GeneCards | Neutrophil extracellular trap formation | HIGD1A  |
| GeneCards | Neutrophil extracellular trap formation | VGLL3   |
| GeneCards | Neutrophil extracellular trap formation | CLCA4   |
| GeneCards | Neutrophil extracellular trap formation | TMEM234 |

|           |                                         |         |
|-----------|-----------------------------------------|---------|
| GeneCards | Neutrophil extracellular trap formation | TMEM41A |
| GeneCards | Neutrophil extracellular trap formation | TMEM50A |
| GeneCards | Neutrophil extracellular trap formation | COX6A1  |
| GeneCards | Neutrophil extracellular trap formation | POLR2K  |
| GeneCards | Neutrophil extracellular trap formation | DACT3   |
| GeneCards | Neutrophil extracellular trap formation | HOXC11  |
| GeneCards | Neutrophil extracellular trap formation | LNP1    |
| GeneCards | Neutrophil extracellular trap formation | FAM72D  |
| GeneCards | Neutrophil extracellular trap formation | NUDT12  |
| GeneCards | Neutrophil extracellular trap formation | ZNF544  |
| GeneCards | Neutrophil extracellular trap formation | ANXA13  |
| GeneCards | Neutrophil extracellular trap formation | KATNBL1 |
| GeneCards | Neutrophil extracellular trap formation | ATCAY   |
| GeneCards | Neutrophil extracellular trap formation | ERP27   |
| GeneCards | Neutrophil extracellular trap formation | RAB32   |
| GeneCards | Neutrophil extracellular trap formation | CMC2    |
| GeneCards | Neutrophil extracellular trap formation | CRACR2B |
| GeneCards | Neutrophil extracellular trap formation | API5    |
| GeneCards | Neutrophil extracellular trap formation | H1-3    |
| GeneCards | Neutrophil extracellular trap formation | PLEKHG1 |
| GeneCards | Neutrophil extracellular trap formation | ZNF319  |
| GeneCards | Neutrophil extracellular trap formation | DLEU2   |

|           |                                         |          |
|-----------|-----------------------------------------|----------|
| GeneCards | Neutrophil extracellular trap formation | TMEM52   |
| GeneCards | Neutrophil extracellular trap formation | ABHD15   |
| GeneCards | Neutrophil extracellular trap formation | CENPE    |
| GeneCards | Neutrophil extracellular trap formation | STXBP1   |
| GeneCards | Neutrophil extracellular trap formation | DLG3     |
| GeneCards | Neutrophil extracellular trap formation | MAFA     |
| GeneCards | Neutrophil extracellular trap formation | ACOX3    |
| GeneCards | Neutrophil extracellular trap formation | PALM     |
| GeneCards | Neutrophil extracellular trap formation | FEM1A    |
| GeneCards | Neutrophil extracellular trap formation | PRSS58   |
| GeneCards | Neutrophil extracellular trap formation | ING1     |
| GeneCards | Neutrophil extracellular trap formation | TMEM218  |
| GeneCards | Neutrophil extracellular trap formation | WNK3     |
| GeneCards | Neutrophil extracellular trap formation | COA3     |
| GeneCards | Neutrophil extracellular trap formation | DNAJB9   |
| GeneCards | Neutrophil extracellular trap formation | RMND5B   |
| GeneCards | Neutrophil extracellular trap formation | IL12RB2  |
| GeneCards | Neutrophil extracellular trap formation | SHPK     |
| GeneCards | Neutrophil extracellular trap formation | TMEM138  |
| GeneCards | Neutrophil extracellular trap formation | LRRC4C   |
| GeneCards | Neutrophil extracellular trap formation | PRICKLE3 |
| GeneCards | Neutrophil extracellular trap formation | PROP1    |

|           |                                         |                    |
|-----------|-----------------------------------------|--------------------|
| GeneCards | Neutrophil extracellular trap formation | HSP90AA4P          |
| GeneCards | Neutrophil extracellular trap formation | VAMP4              |
| GeneCards | Neutrophil extracellular trap formation | PCP4               |
| GeneCards | Neutrophil extracellular trap formation | NR2F2              |
| GeneCards | Neutrophil extracellular trap formation | SMURF2P1-LRRC37BP1 |
| GeneCards | Neutrophil extracellular trap formation | NLGN4X             |
| GeneCards | Neutrophil extracellular trap formation | CENPF              |
| GeneCards | Neutrophil extracellular trap formation | AMOTL2             |
| GeneCards | Neutrophil extracellular trap formation | IGBP1              |
| GeneCards | Neutrophil extracellular trap formation | CYP11A1            |
| GeneCards | Neutrophil extracellular trap formation | MOSPD3             |
| GeneCards | Neutrophil extracellular trap formation | FGFR1OP2           |
| GeneCards | Neutrophil extracellular trap formation | DNAJC11            |
| GeneCards | Neutrophil extracellular trap formation | ADAM32             |
| GeneCards | Neutrophil extracellular trap formation | SPIC               |
| GeneCards | Neutrophil extracellular trap formation | SLC35G5            |
| GeneCards | Neutrophil extracellular trap formation | NTSR2              |
| GeneCards | Neutrophil extracellular trap formation | PPP1R11            |
| GeneCards | Neutrophil extracellular trap formation | BNIP1              |
| GeneCards | Neutrophil extracellular trap formation | MEGF10             |
| GeneCards | Neutrophil extracellular trap formation | DCHS1              |
| GeneCards | Neutrophil extracellular trap formation | BTNL3              |

|           |                                         |         |
|-----------|-----------------------------------------|---------|
| GeneCards | Neutrophil extracellular trap formation | STYK1   |
| GeneCards | Neutrophil extracellular trap formation | ADGRA3  |
| GeneCards | Neutrophil extracellular trap formation | MAMDC4  |
| GeneCards | Neutrophil extracellular trap formation | TMEM263 |
| GeneCards | Neutrophil extracellular trap formation | ODAD3   |
| GeneCards | Neutrophil extracellular trap formation | SMUG1   |
| GeneCards | Neutrophil extracellular trap formation | POLR2D  |
| GeneCards | Neutrophil extracellular trap formation | P4HTM   |
| GeneCards | Neutrophil extracellular trap formation | ZMYM3   |
| GeneCards | Neutrophil extracellular trap formation | YY2     |
| GeneCards | Neutrophil extracellular trap formation | LRRTM1  |
| GeneCards | Neutrophil extracellular trap formation | WDHD1   |
| GeneCards | Neutrophil extracellular trap formation | TCEAL4  |
| GeneCards | Neutrophil extracellular trap formation | CNPY2   |
| GeneCards | Neutrophil extracellular trap formation | PARM1   |
| GeneCards | Neutrophil extracellular trap formation | TBC1D26 |
| GeneCards | Neutrophil extracellular trap formation | ZNF594  |
| GeneCards | Neutrophil extracellular trap formation | TOX4    |
| GeneCards | Neutrophil extracellular trap formation | ALDH9A1 |
| GeneCards | Neutrophil extracellular trap formation | LRRC75B |
| GeneCards | Neutrophil extracellular trap formation | LYZL6   |
| GeneCards | Neutrophil extracellular trap formation | NPAS3   |



|           |                                         |         |
|-----------|-----------------------------------------|---------|
| GeneCards | Neutrophil extracellular trap formation | DHCR7   |
| GeneCards | Neutrophil extracellular trap formation | FGF22   |
| GeneCards | Neutrophil extracellular trap formation | KLK12   |
| GeneCards | Neutrophil extracellular trap formation | CYP2T1P |
| GeneCards | Neutrophil extracellular trap formation | PLXNA1  |
| GeneCards | Neutrophil extracellular trap formation | NEIL1   |
| GeneCards | Neutrophil extracellular trap formation | BFSP2   |
| GeneCards | Neutrophil extracellular trap formation | RAB30   |
| GeneCards | Neutrophil extracellular trap formation | DISP2   |
| GeneCards | Neutrophil extracellular trap formation | PIGZ    |
| GeneCards | Neutrophil extracellular trap formation | LSS     |
| GeneCards | Neutrophil extracellular trap formation | NDUFA8  |
| GeneCards | Neutrophil extracellular trap formation | BOC     |
| GeneCards | Neutrophil extracellular trap formation | COG7    |
| GeneCards | Neutrophil extracellular trap formation | SS18L1  |
| GeneCards | Neutrophil extracellular trap formation | ZDHHC24 |
| GeneCards | Neutrophil extracellular trap formation | CENPI   |
| GeneCards | Neutrophil extracellular trap formation | PRPF18  |
| GeneCards | Neutrophil extracellular trap formation | CCDC82  |
| GeneCards | Neutrophil extracellular trap formation | VCPIP1  |
| GeneCards | Neutrophil extracellular trap formation | ARL1    |
| GeneCards | Neutrophil extracellular trap formation | TSEN15  |

|           |                                         |          |
|-----------|-----------------------------------------|----------|
| GeneCards | Neutrophil extracellular trap formation | YBX3     |
| GeneCards | Neutrophil extracellular trap formation | ALG13    |
| GeneCards | Neutrophil extracellular trap formation | ZNF772   |
| GeneCards | Neutrophil extracellular trap formation | SLX9     |
| GeneCards | Neutrophil extracellular trap formation | CDHR1    |
| GeneCards | Neutrophil extracellular trap formation | C1orf174 |
| GeneCards | Neutrophil extracellular trap formation | CPT1B    |
| GeneCards | Neutrophil extracellular trap formation | ALKBH7   |
| GeneCards | Neutrophil extracellular trap formation | DSCR8    |
| GeneCards | Neutrophil extracellular trap formation | GBGT1    |
| GeneCards | Neutrophil extracellular trap formation | HS3ST3A1 |
| GeneCards | Neutrophil extracellular trap formation | AGPAT5   |
| GeneCards | Neutrophil extracellular trap formation | FIGN     |
| GeneCards | Neutrophil extracellular trap formation | NECAB2   |
| GeneCards | Neutrophil extracellular trap formation | NAF1     |
| GeneCards | Neutrophil extracellular trap formation | METTL7B  |
| GeneCards | Neutrophil extracellular trap formation | ERCC5    |
| GeneCards | Neutrophil extracellular trap formation | SLCO6A1  |
| GeneCards | Neutrophil extracellular trap formation | RILP     |
| GeneCards | Neutrophil extracellular trap formation | MT-ATP8  |
| GeneCards | Neutrophil extracellular trap formation | TDRD10   |
| GeneCards | Neutrophil extracellular trap formation | NOVA2    |

|           |                                         |         |
|-----------|-----------------------------------------|---------|
| GeneCards | Neutrophil extracellular trap formation | CEP44   |
| GeneCards | Neutrophil extracellular trap formation | TMEM205 |
| GeneCards | Neutrophil extracellular trap formation | ADGRA1  |
| GeneCards | Neutrophil extracellular trap formation | AMY2B   |
| GeneCards | Neutrophil extracellular trap formation | MIR4512 |
| GeneCards | Neutrophil extracellular trap formation | WARS2   |
| GeneCards | Neutrophil extracellular trap formation | SALL4   |
| GeneCards | Neutrophil extracellular trap formation | SLC8B1  |
| GeneCards | Neutrophil extracellular trap formation | TPTE    |
| GeneCards | Neutrophil extracellular trap formation | SMPD4   |
| GeneCards | Neutrophil extracellular trap formation | RHBDD1  |
| GeneCards | Neutrophil extracellular trap formation | ZBTB14  |
| GeneCards | Neutrophil extracellular trap formation | NIPAL2  |
| GeneCards | Neutrophil extracellular trap formation | AMER2   |
| GeneCards | Neutrophil extracellular trap formation | AKR7L   |
| GeneCards | Neutrophil extracellular trap formation | CSTF1   |
| GeneCards | Neutrophil extracellular trap formation | PPEF1   |
| GeneCards | Neutrophil extracellular trap formation | H2AC6   |
| GeneCards | Neutrophil extracellular trap formation | NUF2    |
| GeneCards | Neutrophil extracellular trap formation | CES4A   |
| GeneCards | Neutrophil extracellular trap formation | USP22   |
| GeneCards | Neutrophil extracellular trap formation | SASS6   |

|           |                                         |          |
|-----------|-----------------------------------------|----------|
| GeneCards | Neutrophil extracellular trap formation | FAM161B  |
| GeneCards | Neutrophil extracellular trap formation | GPR151   |
| GeneCards | Neutrophil extracellular trap formation | TTC14    |
| GeneCards | Neutrophil extracellular trap formation | ISOC1    |
| GeneCards | Neutrophil extracellular trap formation | KCNN2    |
| GeneCards | Neutrophil extracellular trap formation | ZNF473   |
| GeneCards | Neutrophil extracellular trap formation | PTCH2    |
| GeneCards | Neutrophil extracellular trap formation | DIMT1    |
| GeneCards | Neutrophil extracellular trap formation | CENPN    |
| GeneCards | Neutrophil extracellular trap formation | RBM45    |
| GeneCards | Neutrophil extracellular trap formation | DGCR5    |
| GeneCards | Neutrophil extracellular trap formation | SLC35F2  |
| GeneCards | Neutrophil extracellular trap formation | NSDHL    |
| GeneCards | Neutrophil extracellular trap formation | PKD1L2   |
| GeneCards | Neutrophil extracellular trap formation | SYNC     |
| GeneCards | Neutrophil extracellular trap formation | MRPS12   |
| GeneCards | Neutrophil extracellular trap formation | KIAA1671 |
| GeneCards | Neutrophil extracellular trap formation | ISLR2    |
| GeneCards | Neutrophil extracellular trap formation | URGCP    |
| GeneCards | Neutrophil extracellular trap formation | SLC9B2   |
| GeneCards | Neutrophil extracellular trap formation | CHAF1B   |
| GeneCards | Neutrophil extracellular trap formation | PRRT3    |

|           |                                         |          |
|-----------|-----------------------------------------|----------|
| GeneCards | Neutrophil extracellular trap formation | PITPNM1  |
| GeneCards | Neutrophil extracellular trap formation | SLC25A27 |
| GeneCards | Neutrophil extracellular trap formation | SIGMAR1  |
| GeneCards | Neutrophil extracellular trap formation | NADSYN1  |
| GeneCards | Neutrophil extracellular trap formation | WDR3     |
| GeneCards | Neutrophil extracellular trap formation | TPRN     |
| GeneCards | Neutrophil extracellular trap formation | ABCB10   |
| GeneCards | Neutrophil extracellular trap formation | AGBL3    |
| GeneCards | Neutrophil extracellular trap formation | P3H4     |
| GeneCards | Neutrophil extracellular trap formation | CNEP1R1  |
| GeneCards | Neutrophil extracellular trap formation | RIBC2    |
| GeneCards | Neutrophil extracellular trap formation | FNDC10   |
| GeneCards | Neutrophil extracellular trap formation | COX15    |
| GeneCards | Neutrophil extracellular trap formation | NDUFB3   |
| GeneCards | Neutrophil extracellular trap formation | GBA2     |
| GeneCards | Neutrophil extracellular trap formation | MSH4     |
| GeneCards | Neutrophil extracellular trap formation | NUPR1    |
| GeneCards | Neutrophil extracellular trap formation | STON1    |
| GeneCards | Neutrophil extracellular trap formation | HSD17B14 |
| GeneCards | Neutrophil extracellular trap formation | TMEM207  |
| GeneCards | Neutrophil extracellular trap formation | TMEM95   |
| GeneCards | Neutrophil extracellular trap formation | TMC7     |

|           |                                         |             |
|-----------|-----------------------------------------|-------------|
| GeneCards | Neutrophil extracellular trap formation | PRKAR2A-AS1 |
| GeneCards | Neutrophil extracellular trap formation | RPP30       |
| GeneCards | Neutrophil extracellular trap formation | EI24        |
| GeneCards | Neutrophil extracellular trap formation | ZNF286A     |
| GeneCards | Neutrophil extracellular trap formation | RIC3        |
| GeneCards | Neutrophil extracellular trap formation | ABCG5       |
| GeneCards | Neutrophil extracellular trap formation | OCSTAMP     |
| GeneCards | Neutrophil extracellular trap formation | HUNK        |
| GeneCards | Neutrophil extracellular trap formation | ASPSR1      |
| GeneCards | Neutrophil extracellular trap formation | HRC         |
| GeneCards | Neutrophil extracellular trap formation | ECSCR       |
| GeneCards | Neutrophil extracellular trap formation | FAM124A     |
| GeneCards | Neutrophil extracellular trap formation | HOMER2      |
| GeneCards | Neutrophil extracellular trap formation | DANCR       |
| GeneCards | Neutrophil extracellular trap formation | KAT14       |
| GeneCards | Neutrophil extracellular trap formation | NKX2-8      |
| GeneCards | Neutrophil extracellular trap formation | RINT1       |
| GeneCards | Neutrophil extracellular trap formation | LMF2        |
| GeneCards | Neutrophil extracellular trap formation | MTERF3      |
| GeneCards | Neutrophil extracellular trap formation | TBRG4       |
| GeneCards | Neutrophil extracellular trap formation | IQANK1      |
| GeneCards | Neutrophil extracellular trap formation | MORC4       |

|           |                                         |            |
|-----------|-----------------------------------------|------------|
| GeneCards | Neutrophil extracellular trap formation | HEPH       |
| GeneCards | Neutrophil extracellular trap formation | CCDC50     |
| GeneCards | Neutrophil extracellular trap formation | FNTA       |
| GeneCards | Neutrophil extracellular trap formation | TWF1       |
| GeneCards | Neutrophil extracellular trap formation | MOB3B      |
| GeneCards | Neutrophil extracellular trap formation | ACAA2      |
| GeneCards | Neutrophil extracellular trap formation | PDCD2L     |
| GeneCards | Neutrophil extracellular trap formation | CA10       |
| GeneCards | Neutrophil extracellular trap formation | ERMP1      |
| GeneCards | Neutrophil extracellular trap formation | MORF4L2    |
| GeneCards | Neutrophil extracellular trap formation | EAF2       |
| GeneCards | Neutrophil extracellular trap formation | PHLDA1     |
| GeneCards | Neutrophil extracellular trap formation | SNX19      |
| GeneCards | Neutrophil extracellular trap formation | ZNF407-AS1 |
| GeneCards | Neutrophil extracellular trap formation | UNG        |
| GeneCards | Neutrophil extracellular trap formation | SAR1B      |
| GeneCards | Neutrophil extracellular trap formation | ZNF331     |
| GeneCards | Neutrophil extracellular trap formation | HAP1       |
| GeneCards | Neutrophil extracellular trap formation | TNMD       |
| GeneCards | Neutrophil extracellular trap formation | EPM2AIP1   |
| GeneCards | Neutrophil extracellular trap formation | MYBPC1     |
| GeneCards | Neutrophil extracellular trap formation | IFT80      |

|           |                                         |          |
|-----------|-----------------------------------------|----------|
| GeneCards | Neutrophil extracellular trap formation | B3GNT9   |
| GeneCards | Neutrophil extracellular trap formation | PRMT6    |
| GeneCards | Neutrophil extracellular trap formation | TCAF1    |
| GeneCards | Neutrophil extracellular trap formation | SMC5     |
| GeneCards | Neutrophil extracellular trap formation | HOXB2    |
| GeneCards | Neutrophil extracellular trap formation | TTC39B   |
| GeneCards | Neutrophil extracellular trap formation | TRIM38   |
| GeneCards | Neutrophil extracellular trap formation | RAB23    |
| GeneCards | Neutrophil extracellular trap formation | CHMP4A   |
| GeneCards | Neutrophil extracellular trap formation | SHISA2   |
| GeneCards | Neutrophil extracellular trap formation | KIF20A   |
| GeneCards | Neutrophil extracellular trap formation | ALG5     |
| GeneCards | Neutrophil extracellular trap formation | PSME4    |
| GeneCards | Neutrophil extracellular trap formation | MANEA    |
| GeneCards | Neutrophil extracellular trap formation | HEPACAM2 |
| GeneCards | Neutrophil extracellular trap formation | SSBP3    |
| GeneCards | Neutrophil extracellular trap formation | ECEL1    |
| GeneCards | Neutrophil extracellular trap formation | DLK2     |
| GeneCards | Neutrophil extracellular trap formation | ARMCX5   |
| GeneCards | Neutrophil extracellular trap formation | RNASE7   |
| GeneCards | Neutrophil extracellular trap formation | MRPS11   |
| GeneCards | Neutrophil extracellular trap formation | FLYWCH1  |



|           |                                         |          |
|-----------|-----------------------------------------|----------|
| GeneCards | Neutrophil extracellular trap formation | VPS9D1   |
| GeneCards | Neutrophil extracellular trap formation | PRR22    |
| GeneCards | Neutrophil extracellular trap formation | THAP12   |
| GeneCards | Neutrophil extracellular trap formation | DCAF13   |
| GeneCards | Neutrophil extracellular trap formation | CSDE1    |
| GeneCards | Neutrophil extracellular trap formation | ASPA     |
| GeneCards | Neutrophil extracellular trap formation | CA13     |
| GeneCards | Neutrophil extracellular trap formation | RPUSD4   |
| GeneCards | Neutrophil extracellular trap formation | HYDIN2   |
| GeneCards | Neutrophil extracellular trap formation | TBC1D10B |
| GeneCards | Neutrophil extracellular trap formation | CHAMP1   |
| GeneCards | Neutrophil extracellular trap formation | ORC5     |
| GeneCards | Neutrophil extracellular trap formation | CHAF1A   |
| GeneCards | Neutrophil extracellular trap formation | NDUFAF4  |
| GeneCards | Neutrophil extracellular trap formation | TOMM22   |
| GeneCards | Neutrophil extracellular trap formation | TIMM23   |
| GeneCards | Neutrophil extracellular trap formation | MICOS13  |
| GeneCards | Neutrophil extracellular trap formation | LRFN5    |
| GeneCards | Neutrophil extracellular trap formation | OCA2     |
| GeneCards | Neutrophil extracellular trap formation | UGT2B15  |
| GeneCards | Neutrophil extracellular trap formation | RABEP2   |
| GeneCards | Neutrophil extracellular trap formation | SGO1     |

|           |                                         |          |
|-----------|-----------------------------------------|----------|
| GeneCards | Neutrophil extracellular trap formation | SIGLEC11 |
| GeneCards | Neutrophil extracellular trap formation | BARD1    |
| GeneCards | Neutrophil extracellular trap formation | TMEM126B |
| GeneCards | Neutrophil extracellular trap formation | DNAJB2   |
| GeneCards | Neutrophil extracellular trap formation | B3GNT4   |
| GeneCards | Neutrophil extracellular trap formation | FANK1    |
| GeneCards | Neutrophil extracellular trap formation | TMUB1    |
| GeneCards | Neutrophil extracellular trap formation | SF3B6    |
| GeneCards | Neutrophil extracellular trap formation | LRCH2    |
| GeneCards | Neutrophil extracellular trap formation | ARFGEF3  |
| GeneCards | Neutrophil extracellular trap formation | GOLGA5   |
| GeneCards | Neutrophil extracellular trap formation | POLR3K   |
| GeneCards | Neutrophil extracellular trap formation | NKD1     |
| GeneCards | Neutrophil extracellular trap formation | MAP1LC3C |
| GeneCards | Neutrophil extracellular trap formation | PGGT1B   |
| GeneCards | Neutrophil extracellular trap formation | REPIN1   |
| GeneCards | Neutrophil extracellular trap formation | EMC3     |
| GeneCards | Neutrophil extracellular trap formation | NPY2R    |
| GeneCards | Neutrophil extracellular trap formation | ANAPC11  |
| GeneCards | Neutrophil extracellular trap formation | CCNF     |
| GeneCards | Neutrophil extracellular trap formation | GPR158   |
| GeneCards | Neutrophil extracellular trap formation | FAM234B  |

|           |                                         |           |
|-----------|-----------------------------------------|-----------|
| GeneCards | Neutrophil extracellular trap formation | ARHGAP6   |
| GeneCards | Neutrophil extracellular trap formation | CYP2A6    |
| GeneCards | Neutrophil extracellular trap formation | HSP90AB4P |
| GeneCards | Neutrophil extracellular trap formation | SIM1      |
| GeneCards | Neutrophil extracellular trap formation | NCAM2     |
| GeneCards | Neutrophil extracellular trap formation | ZIC5      |
| GeneCards | Neutrophil extracellular trap formation | RCN3      |
| GeneCards | Neutrophil extracellular trap formation | PEX26     |
| GeneCards | Neutrophil extracellular trap formation | KBTBD4    |
| GeneCards | Neutrophil extracellular trap formation | TMEM255A  |
| GeneCards | Neutrophil extracellular trap formation | MINDY4    |
| GeneCards | Neutrophil extracellular trap formation | RMND1     |
| GeneCards | Neutrophil extracellular trap formation | POLN      |
| GeneCards | Neutrophil extracellular trap formation | MRPS17    |
| GeneCards | Neutrophil extracellular trap formation | PET117    |
| GeneCards | Neutrophil extracellular trap formation | RGS9BP    |
| GeneCards | Neutrophil extracellular trap formation | BTNL9     |
| GeneCards | Neutrophil extracellular trap formation | ATG101    |
| GeneCards | Neutrophil extracellular trap formation | SYCE2     |
| GeneCards | Neutrophil extracellular trap formation | AKR1C4    |
| GeneCards | Neutrophil extracellular trap formation | TMEM130   |
| GeneCards | Neutrophil extracellular trap formation | TXNDC15   |

|           |                                         |             |
|-----------|-----------------------------------------|-------------|
| GeneCards | Neutrophil extracellular trap formation | CCDC124     |
| GeneCards | Neutrophil extracellular trap formation | PKMYT1      |
| GeneCards | Neutrophil extracellular trap formation | SLC22A18    |
| GeneCards | Neutrophil extracellular trap formation | NDUFA7      |
| GeneCards | Neutrophil extracellular trap formation | RPP21       |
| GeneCards | Neutrophil extracellular trap formation | UBE2B       |
| GeneCards | Neutrophil extracellular trap formation | LANCL1      |
| GeneCards | Neutrophil extracellular trap formation | UQCRQ       |
| GeneCards | Neutrophil extracellular trap formation | LY6G6F      |
| GeneCards | Neutrophil extracellular trap formation | UBE2S       |
| GeneCards | Neutrophil extracellular trap formation | CABLES2     |
| GeneCards | Neutrophil extracellular trap formation | ZNF837      |
| GeneCards | Neutrophil extracellular trap formation | C6orf141    |
| GeneCards | Neutrophil extracellular trap formation | FAM167A-AS1 |
| GeneCards | Neutrophil extracellular trap formation | TSSC2       |
| GeneCards | Neutrophil extracellular trap formation | NUP54       |
| GeneCards | Neutrophil extracellular trap formation | BRWD3       |
| GeneCards | Neutrophil extracellular trap formation | ZNF66       |
| GeneCards | Neutrophil extracellular trap formation | HCCS        |
| GeneCards | Neutrophil extracellular trap formation | UBE2D4      |
| GeneCards | Neutrophil extracellular trap formation | POLR2G      |
| GeneCards | Neutrophil extracellular trap formation | SERINC1     |

|           |                                         |         |
|-----------|-----------------------------------------|---------|
| GeneCards | Neutrophil extracellular trap formation | KRT4    |
| GeneCards | Neutrophil extracellular trap formation | DDX28   |
| GeneCards | Neutrophil extracellular trap formation | RNF182  |
| GeneCards | Neutrophil extracellular trap formation | CCDC137 |
| GeneCards | Neutrophil extracellular trap formation | FSD1    |
| GeneCards | Neutrophil extracellular trap formation | GNPNAT1 |
| GeneCards | Neutrophil extracellular trap formation | DEFB127 |
| GeneCards | Neutrophil extracellular trap formation | RNF115  |
| GeneCards | Neutrophil extracellular trap formation | KCNG3   |
| GeneCards | Neutrophil extracellular trap formation | STRADB  |
| GeneCards | Neutrophil extracellular trap formation | ERC2    |
| GeneCards | Neutrophil extracellular trap formation | SLC16A6 |
| GeneCards | Neutrophil extracellular trap formation | MRPS18B |
| GeneCards | Neutrophil extracellular trap formation | CPED1   |
| GeneCards | Neutrophil extracellular trap formation | KCND3   |
| GeneCards | Neutrophil extracellular trap formation | CYP4X1  |
| GeneCards | Neutrophil extracellular trap formation | SOX15   |
| GeneCards | Neutrophil extracellular trap formation | DEFB123 |
| GeneCards | Neutrophil extracellular trap formation | SPRN    |
| GeneCards | Neutrophil extracellular trap formation | AZI2    |
| GeneCards | Neutrophil extracellular trap formation | PROSER1 |
| GeneCards | Neutrophil extracellular trap formation | MOSPD1  |

|           |                                         |           |
|-----------|-----------------------------------------|-----------|
| GeneCards | Neutrophil extracellular trap formation | LIN7B     |
| GeneCards | Neutrophil extracellular trap formation | HEXIM2    |
| GeneCards | Neutrophil extracellular trap formation | ONECUT1   |
| GeneCards | Neutrophil extracellular trap formation | ATPAF1    |
| GeneCards | Neutrophil extracellular trap formation | COQ10A    |
| GeneCards | Neutrophil extracellular trap formation | LRSAM1    |
| GeneCards | Neutrophil extracellular trap formation | BTBD18    |
| GeneCards | Neutrophil extracellular trap formation | ERICH5    |
| GeneCards | Neutrophil extracellular trap formation | IRF7      |
| GeneCards | Neutrophil extracellular trap formation | TRIM3     |
| GeneCards | Neutrophil extracellular trap formation | PDLIM3    |
| GeneCards | Neutrophil extracellular trap formation | ANGEL2    |
| GeneCards | Neutrophil extracellular trap formation | FAM131B   |
| GeneCards | Neutrophil extracellular trap formation | LINC00649 |
| GeneCards | Neutrophil extracellular trap formation | MALINC1   |
| GeneCards | Neutrophil extracellular trap formation | STK32B    |
| GeneCards | Neutrophil extracellular trap formation | TRPT1     |
| GeneCards | Neutrophil extracellular trap formation | ZBTB3     |
| GeneCards | Neutrophil extracellular trap formation | SNRPG     |
| GeneCards | Neutrophil extracellular trap formation | GAMT      |
| GeneCards | Neutrophil extracellular trap formation | ATF5      |
| GeneCards | Neutrophil extracellular trap formation | PLA2G4C   |

|           |                                         |           |
|-----------|-----------------------------------------|-----------|
| GeneCards | Neutrophil extracellular trap formation | EN1       |
| GeneCards | Neutrophil extracellular trap formation | TACC3     |
| GeneCards | Neutrophil extracellular trap formation | STPG1     |
| GeneCards | Neutrophil extracellular trap formation | XPA       |
| GeneCards | Neutrophil extracellular trap formation | SLC35A2   |
| GeneCards | Neutrophil extracellular trap formation | ANXA10    |
| GeneCards | Neutrophil extracellular trap formation | BAAT      |
| GeneCards | Neutrophil extracellular trap formation | FAM120C   |
| GeneCards | Neutrophil extracellular trap formation | ELSPBP1   |
| GeneCards | Neutrophil extracellular trap formation | B3GALT6   |
| GeneCards | Neutrophil extracellular trap formation | HMGN3     |
| GeneCards | Neutrophil extracellular trap formation | SLC25A20  |
| GeneCards | Neutrophil extracellular trap formation | MRPS5     |
| GeneCards | Neutrophil extracellular trap formation | CYP2S1    |
| GeneCards | Neutrophil extracellular trap formation | AGR3      |
| GeneCards | Neutrophil extracellular trap formation | ABHD14A   |
| GeneCards | Neutrophil extracellular trap formation | BCAP29    |
| GeneCards | Neutrophil extracellular trap formation | HCFC2     |
| GeneCards | Neutrophil extracellular trap formation | ZCCHC18   |
| GeneCards | Neutrophil extracellular trap formation | SMIM10L2A |
| GeneCards | Neutrophil extracellular trap formation | TBX5      |
| GeneCards | Neutrophil extracellular trap formation | DAPK3     |

|           |                                         |          |
|-----------|-----------------------------------------|----------|
| GeneCards | Neutrophil extracellular trap formation | SARM1    |
| GeneCards | Neutrophil extracellular trap formation | DUS4L    |
| GeneCards | Neutrophil extracellular trap formation | SLC9A5   |
| GeneCards | Neutrophil extracellular trap formation | HEY1     |
| GeneCards | Neutrophil extracellular trap formation | HSD17B7  |
| GeneCards | Neutrophil extracellular trap formation | GGNBP2   |
| GeneCards | Neutrophil extracellular trap formation | TUBG1    |
| GeneCards | Neutrophil extracellular trap formation | EDA2R    |
| GeneCards | Neutrophil extracellular trap formation | SH3GLB2  |
| GeneCards | Neutrophil extracellular trap formation | ZNF239   |
| GeneCards | Neutrophil extracellular trap formation | DENND2A  |
| GeneCards | Neutrophil extracellular trap formation | IDH3A    |
| GeneCards | Neutrophil extracellular trap formation | EXOG     |
| GeneCards | Neutrophil extracellular trap formation | TMEFF1   |
| GeneCards | Neutrophil extracellular trap formation | ASPHD2   |
| GeneCards | Neutrophil extracellular trap formation | FOXI3    |
| GeneCards | Neutrophil extracellular trap formation | IFTAP    |
| GeneCards | Neutrophil extracellular trap formation | ISCU     |
| GeneCards | Neutrophil extracellular trap formation | EMC6     |
| GeneCards | Neutrophil extracellular trap formation | SLC25A14 |
| GeneCards | Neutrophil extracellular trap formation | FBXO8    |
| GeneCards | Neutrophil extracellular trap formation | CYP4Z1   |



|           |                                         |            |
|-----------|-----------------------------------------|------------|
| GeneCards | Neutrophil extracellular trap formation | CETN2      |
| GeneCards | Neutrophil extracellular trap formation | DLGAP3     |
| GeneCards | Neutrophil extracellular trap formation | MAGEA12    |
| GeneCards | Neutrophil extracellular trap formation | SYTL5      |
| GeneCards | Neutrophil extracellular trap formation | TMEM262    |
| GeneCards | Neutrophil extracellular trap formation | ABCG8      |
| GeneCards | Neutrophil extracellular trap formation | C1orf159   |
| GeneCards | Neutrophil extracellular trap formation | PRELID3A   |
| GeneCards | Neutrophil extracellular trap formation | TSPEAR-AS2 |
| GeneCards | Neutrophil extracellular trap formation | NFYC-AS1   |
| GeneCards | Neutrophil extracellular trap formation | PHF10      |
| GeneCards | Neutrophil extracellular trap formation | PNPT1      |
| GeneCards | Neutrophil extracellular trap formation | NDUFAF2    |
| GeneCards | Neutrophil extracellular trap formation | PLEKHA4    |
| GeneCards | Neutrophil extracellular trap formation | ZBTB6      |
| GeneCards | Neutrophil extracellular trap formation | CD99P1     |
| GeneCards | Neutrophil extracellular trap formation | CHD2       |
| GeneCards | Neutrophil extracellular trap formation | ZDHHC16    |
| GeneCards | Neutrophil extracellular trap formation | TTBK1      |
| GeneCards | Neutrophil extracellular trap formation | C8orf76    |
| GeneCards | Neutrophil extracellular trap formation | IFITM5     |
| GeneCards | Neutrophil extracellular trap formation | LIMCH1     |

|           |                                         |          |
|-----------|-----------------------------------------|----------|
| GeneCards | Neutrophil extracellular trap formation | NDUFB5   |
| GeneCards | Neutrophil extracellular trap formation | LHFPL1   |
| GeneCards | Neutrophil extracellular trap formation | ZNF205   |
| GeneCards | Neutrophil extracellular trap formation | CYP4V2   |
| GeneCards | Neutrophil extracellular trap formation | WDR45    |
| GeneCards | Neutrophil extracellular trap formation | SRXN1    |
| GeneCards | Neutrophil extracellular trap formation | C11orf96 |
| GeneCards | Neutrophil extracellular trap formation | ZNF451   |
| GeneCards | Neutrophil extracellular trap formation | GSTA4    |
| GeneCards | Neutrophil extracellular trap formation | RHBG     |
| GeneCards | Neutrophil extracellular trap formation | CEP120   |
| GeneCards | Neutrophil extracellular trap formation | KLHL14   |
| GeneCards | Neutrophil extracellular trap formation | RNPC3    |
| GeneCards | Neutrophil extracellular trap formation | TMEM231  |
| GeneCards | Neutrophil extracellular trap formation | ATP13A5  |
| GeneCards | Neutrophil extracellular trap formation | UBE2T    |
| GeneCards | Neutrophil extracellular trap formation | SIM2     |
| GeneCards | Neutrophil extracellular trap formation | C1orf94  |
| GeneCards | Neutrophil extracellular trap formation | NOC3L    |
| GeneCards | Neutrophil extracellular trap formation | TBC1D30  |
| GeneCards | Neutrophil extracellular trap formation | TMEM19   |
| GeneCards | Neutrophil extracellular trap formation | CTNNA2   |

|           |                                         |          |
|-----------|-----------------------------------------|----------|
| GeneCards | Neutrophil extracellular trap formation | SHANK1   |
| GeneCards | Neutrophil extracellular trap formation | SULT2A1  |
| GeneCards | Neutrophil extracellular trap formation | GUCY1A2  |
| GeneCards | Neutrophil extracellular trap formation | RBP2     |
| GeneCards | Neutrophil extracellular trap formation | NUDT22   |
| GeneCards | Neutrophil extracellular trap formation | GOLT1B   |
| GeneCards | Neutrophil extracellular trap formation | ISL1     |
| GeneCards | Neutrophil extracellular trap formation | ZNHIT3   |
| GeneCards | Neutrophil extracellular trap formation | ABCF2    |
| GeneCards | Neutrophil extracellular trap formation | MOB4     |
| GeneCards | Neutrophil extracellular trap formation | MAGED4B  |
| GeneCards | Neutrophil extracellular trap formation | TMC2     |
| GeneCards | Neutrophil extracellular trap formation | TMEM132B |
| GeneCards | Neutrophil extracellular trap formation | UQCC3    |
| GeneCards | Neutrophil extracellular trap formation | HRCT1    |
| GeneCards | Neutrophil extracellular trap formation | CLDN8    |
| GeneCards | Neutrophil extracellular trap formation | TMEM169  |
| GeneCards | Neutrophil extracellular trap formation | PLPBP    |
| GeneCards | Neutrophil extracellular trap formation | PIPOX    |
| GeneCards | Neutrophil extracellular trap formation | MEX3C    |
| GeneCards | Neutrophil extracellular trap formation | ISOC2    |
| GeneCards | Neutrophil extracellular trap formation | TMEM129  |

|           |                                         |         |
|-----------|-----------------------------------------|---------|
| GeneCards | Neutrophil extracellular trap formation | H1-6    |
| GeneCards | Neutrophil extracellular trap formation | CRYBG3  |
| GeneCards | Neutrophil extracellular trap formation | RERG    |
| GeneCards | Neutrophil extracellular trap formation | CD2-LCR |
| GeneCards | Neutrophil extracellular trap formation | MICALL2 |
| GeneCards | Neutrophil extracellular trap formation | ZNF275  |
| GeneCards | Neutrophil extracellular trap formation | MT-ND4  |
| GeneCards | Neutrophil extracellular trap formation | COX17   |
| GeneCards | Neutrophil extracellular trap formation | ST6GAL2 |
| GeneCards | Neutrophil extracellular trap formation | GLT8D2  |
| GeneCards | Neutrophil extracellular trap formation | PXMP2   |
| GeneCards | Neutrophil extracellular trap formation | MRPL55  |
| GeneCards | Neutrophil extracellular trap formation | IZUMO2  |
| GeneCards | Neutrophil extracellular trap formation | PEX16   |
| GeneCards | Neutrophil extracellular trap formation | SPATA18 |
| GeneCards | Neutrophil extracellular trap formation | ADCY8   |
| GeneCards | Neutrophil extracellular trap formation | BBS5    |
| GeneCards | Neutrophil extracellular trap formation | SH3GL3  |
| GeneCards | Neutrophil extracellular trap formation | YTHDC1  |
| GeneCards | Neutrophil extracellular trap formation | ABLIM2  |
| GeneCards | Neutrophil extracellular trap formation | MRPL22  |
| GeneCards | Neutrophil extracellular trap formation | SDAD1   |

|           |                                         |           |
|-----------|-----------------------------------------|-----------|
| GeneCards | Neutrophil extracellular trap formation | C3orf18   |
| GeneCards | Neutrophil extracellular trap formation | ZNF813    |
| GeneCards | Neutrophil extracellular trap formation | ING3      |
| GeneCards | Neutrophil extracellular trap formation | REEP6     |
| GeneCards | Neutrophil extracellular trap formation | MFN1      |
| GeneCards | Neutrophil extracellular trap formation | C3orf14   |
| GeneCards | Neutrophil extracellular trap formation | TMEM185A  |
| GeneCards | Neutrophil extracellular trap formation | KCNB2     |
| GeneCards | Neutrophil extracellular trap formation | TMEM59L   |
| GeneCards | Neutrophil extracellular trap formation | KLHL13    |
| GeneCards | Neutrophil extracellular trap formation | GTF2E1    |
| GeneCards | Neutrophil extracellular trap formation | ZNF18     |
| GeneCards | Neutrophil extracellular trap formation | CEP126    |
| GeneCards | Neutrophil extracellular trap formation | RHNO1     |
| GeneCards | Neutrophil extracellular trap formation | SOX21-AS1 |
| GeneCards | Neutrophil extracellular trap formation | MIS18BP1  |
| GeneCards | Neutrophil extracellular trap formation | SLC17A1   |
| GeneCards | Neutrophil extracellular trap formation | DCBLD1    |
| GeneCards | Neutrophil extracellular trap formation | WTIP      |
| GeneCards | Neutrophil extracellular trap formation | GLRA4     |
| GeneCards | Neutrophil extracellular trap formation | FOXG1     |
| GeneCards | Neutrophil extracellular trap formation | PEX3      |

|           |                                         |           |
|-----------|-----------------------------------------|-----------|
| GeneCards | Neutrophil extracellular trap formation | LINC01194 |
| GeneCards | Neutrophil extracellular trap formation | TRIM16L   |
| GeneCards | Neutrophil extracellular trap formation | MMP23A    |
| GeneCards | Neutrophil extracellular trap formation | ABCB8     |
| GeneCards | Neutrophil extracellular trap formation | KCNG1     |
| GeneCards | Neutrophil extracellular trap formation | ZDHHC11   |
| GeneCards | Neutrophil extracellular trap formation | ENO4      |
| GeneCards | Neutrophil extracellular trap formation | MIR218-2  |
| GeneCards | Neutrophil extracellular trap formation | WASH6P    |
| GeneCards | Neutrophil extracellular trap formation | BSDC1     |
| GeneCards | Neutrophil extracellular trap formation | IYD       |
| GeneCards | Neutrophil extracellular trap formation | UGT1A4    |
| GeneCards | Neutrophil extracellular trap formation | RLIM      |
| GeneCards | Neutrophil extracellular trap formation | KIF15     |
| GeneCards | Neutrophil extracellular trap formation | PLIN4     |
| GeneCards | Neutrophil extracellular trap formation | CFAP300   |
| GeneCards | Neutrophil extracellular trap formation | SLC17A3   |
| GeneCards | Neutrophil extracellular trap formation | GDPD1     |
| GeneCards | Neutrophil extracellular trap formation | HBE1      |
| GeneCards | Neutrophil extracellular trap formation | MRPL27    |
| GeneCards | Neutrophil extracellular trap formation | CCDC113   |
| GeneCards | Neutrophil extracellular trap formation | DYNLT2    |

|           |                                         |           |
|-----------|-----------------------------------------|-----------|
| GeneCards | Neutrophil extracellular trap formation | MSL3      |
| GeneCards | Neutrophil extracellular trap formation | SPCS1     |
| GeneCards | Neutrophil extracellular trap formation | CKMT2-AS1 |
| GeneCards | Neutrophil extracellular trap formation | MOGAT3    |
| GeneCards | Neutrophil extracellular trap formation | DEFA1A3   |
| GeneCards | Neutrophil extracellular trap formation | KCNQ3     |
| GeneCards | Neutrophil extracellular trap formation | AASS      |
| GeneCards | Neutrophil extracellular trap formation | NOVA1     |
| GeneCards | Neutrophil extracellular trap formation | VGLL2     |
| GeneCards | Neutrophil extracellular trap formation | ACP4      |
| GeneCards | Neutrophil extracellular trap formation | SMC6      |
| GeneCards | Neutrophil extracellular trap formation | ARID3C    |
| GeneCards | Neutrophil extracellular trap formation | TAS2R3    |
| GeneCards | Neutrophil extracellular trap formation | ZNF320    |
| GeneCards | Neutrophil extracellular trap formation | HINT2     |
| GeneCards | Neutrophil extracellular trap formation | IGSF9B    |
| GeneCards | Neutrophil extracellular trap formation | TDH       |
| GeneCards | Neutrophil extracellular trap formation | LINC01121 |
| GeneCards | Neutrophil extracellular trap formation | ZNF532    |
| GeneCards | Neutrophil extracellular trap formation | ACRV1     |
| GeneCards | Neutrophil extracellular trap formation | TMEM223   |
| GeneCards | Neutrophil extracellular trap formation | TUT7      |

|           |                                         |           |
|-----------|-----------------------------------------|-----------|
| GeneCards | Neutrophil extracellular trap formation | FASTKD2   |
| GeneCards | Neutrophil extracellular trap formation | NR2F2-AS1 |

---



**Supplementary Table 5. Summary of identification compounds**

| Name                                                        | FISh Coverage | Delta<br>Mass | Calc.<br>MW | m/z | RT  |
|-------------------------------------------------------------|---------------|---------------|-------------|-----|-----|
| Adenosine                                                   | 65.31         | 0.000         | 267.0       | 268 | 4.5 |
|                                                             |               | 01            | 9676        | .10 | 72  |
|                                                             |               |               |             | 403 |     |
| L-Phenylalanine                                             | 82.14         | -             | 148.0       | 166 | 5.2 |
|                                                             |               | 17.02         | 5243        | .08 | 74  |
|                                                             |               | 654           |             | 626 |     |
| D-(+)-Proline                                               | 57.14         | 0.000         | 115.06      | 116 | 1.4 |
|                                                             |               | 21            | 354         | .07 | 2   |
|                                                             |               |               |             | 082 |     |
| Catechol                                                    | 42.86         | -             | 110.03      | 109 | 7.7 |
|                                                             |               | 0.001         | 544         | .02 | 16  |
|                                                             |               | 34            |             | 817 |     |
| Citraconic acid                                             | 26.09         | -             | 130.0       | 129 | 4.4 |
|                                                             |               | 0.001         | 2539        | .01 | 23  |
|                                                             |               | 22            |             | 811 |     |
| 2,3,4,9-Tetrahydro-1H- $\beta$ -carboline-3-carboxylic acid | 55.56         | 0.000         | 216.0       | 217 | 8.5 |
|                                                             |               | 04            | 8992        | .09 | 89  |
|                                                             |               |               |             | 72  |     |
| L-Isoleucine                                                | 76.92         | 0.000         | 131.0       | 132 | 2.5 |
|                                                             |               | 04            | 9467        | .10 | 53  |
|                                                             |               |               |             | 194 |     |
| Benzoic acid                                                | 18.18         | -             | 122.0       | 121 | 9.7 |
|                                                             |               | 0.001         | 3557        | .02 | 31  |
|                                                             |               | 21            |             | 829 |     |
| Adenine                                                     | 45.45         | 0.000         | 135.0       | 136 | 1.6 |
|                                                             |               | 03            | 5452        | .06 | 52  |
|                                                             |               |               |             | 18  |     |
| 4-Oxoproline                                                | 20.83         | -             | 129.0       | 128 | 2.6 |
|                                                             |               | 0.001         | 4137        | .03 | 21  |
|                                                             |               | 22            |             | 407 |     |
| Tryptamine                                                  |               | 0.000         | 160.1       | 144 | 6.4 |
|                                                             |               | 2             | 0025        | .08 | 67  |
|                                                             |               |               |             | 096 |     |
| 2'-Deoxyadenosine                                           |               | -             | 251.1       | 252 | 4.8 |
|                                                             |               | 0.000         | 0175        | .10 | 23  |
|                                                             |               | 09            |             | 902 |     |
| Chlorogenic acid                                            |               | 0.000         | 354.0       | 353 | 10. |
|                                                             |               | 36            | 9544        | .08 | 413 |
|                                                             |               |               |             | 817 |     |
| Guanine                                                     |               | -             | 134.0       | 152 | 5.3 |

|                              |        |       |     |     |
|------------------------------|--------|-------|-----|-----|
|                              | 17.02  | 2292  | .05 | 54  |
|                              | 649    |       | 675 |     |
| Isoliquiritigenin            | -      | 256.0 | 257 | 15. |
|                              | 0.000  | 7341  | .08 | 667 |
|                              | 15     |       | 054 |     |
| Oleanolic acid               | 0      | 456.3 | 455 | 21. |
|                              |        | 6035  | .35 | 904 |
|                              |        |       | 327 |     |
| Isoliquiritigenin            | -      | 256.0 | 257 | 11. |
|                              | 0.000  | 7274  | .08 | 905 |
|                              | 82     |       | 002 |     |
| Salicylic acid               | -      | 138.0 | 137 | 13. |
|                              | 0.0011 | 3056  | .02 | 02  |
|                              | 3      |       | 328 |     |
| Salicylic acid               | -      | 138.0 | 137 | 9.1 |
|                              | 0.001  | 3061  | .02 | 08  |
|                              | 09     |       | 333 |     |
| Di(2-ethylhexyl) phthalate   | -      | 390.2 | 391 | 23. |
|                              | 0.000  | 7613  | .28 | 058 |
|                              | 88     |       | 333 |     |
| Trigonelline                 | -      | 137.0 | 138 | 1.5 |
|                              | 0.000  | 4764  | .05 | 06  |
|                              | 04     |       | 492 |     |
| Isoliquiritigenin            | -      | 256.0 | 257 | 11. |
|                              | 0.000  | 7296  | .08 | 489 |
|                              | 6      |       | 023 |     |
| Formononetin                 | 0.000  | 268.0 | 267 | 14. |
|                              | 25     | 738   | .06 | 348 |
|                              |        |       | 653 |     |
| Isoliquiritigenin            | -      | 256.0 | 257 | 13. |
|                              | 0.000  | 7309  | .08 | 69  |
|                              | 46     |       | 02  |     |
| Ononin                       | -      | 430.1 | 431 | 13. |
|                              | 0.000  | 2548  | .13 | 416 |
|                              | 9      |       | 248 |     |
| 5'-S-Methyl-5'-thioadenosine | 0.000  | 297.0 | 298 | 7.9 |
|                              | 09     | 8965  | .09 | 88  |
|                              |        |       | 692 |     |
| Nicotinic acid               | 0.000  | 123.0 | 124 | 2.0 |
|                              | 25     | 3228  | .03 | 51  |
|                              |        |       | 956 |     |
| Formononetin                 | -      | 268.0 | 269 | 15. |
|                              | 0.000  | 7318  | .08 | 881 |
|                              | 38     |       | 029 |     |

|                                           |       |        |     |     |
|-------------------------------------------|-------|--------|-----|-----|
| Bis(4-ethylbenzylidene)sorbitol           | -     | 414.2  | 415 | 17. |
|                                           | 0.000 | 0369   | .21 | 183 |
|                                           | 54    |        | 091 |     |
| Uracil                                    | 0.000 | 112.02 | 113 | 3.5 |
|                                           | 43    | 771    | .03 | 02  |
|                                           |       |        | 499 |     |
| Dibutyl phthalate                         | -     | 278.1  | 279 | 18. |
|                                           | 0.000 | 5161   | .15 | 591 |
|                                           | 2     |        | 891 |     |
| Azelaic acid                              | -     | 188.1  | 187 | 13. |
|                                           | 0.000 | 0408   | .09 | 428 |
|                                           | 78    |        | 677 |     |
| N6-Me-Adenosine                           | 0.000 | 281.11 | 282 | 6.6 |
|                                           | 31    | 271    | .12 |     |
| 2'-O-Methyladenosine                      | 0.000 | 281.11 | 282 | 5.9 |
|                                           | 12    | 252    | .11 | 79  |
|                                           |       |        | 981 |     |
| Dipropyleneglycol dibenzoate              | -     | 342.1  | 365 | 18. |
|                                           | 0.000 | 4631   | .13 | 235 |
|                                           | 41    |        | 55  |     |
| 2-(Acetylamino)hexanoic acid              | -     | 173.1  | 172 | 10. |
|                                           | 0.000 | 0438   | .09 | 969 |
|                                           | 81    |        | 711 |     |
| Linoleoyl ethanolamide                    | -     | 323.2  | 324 | 21. |
|                                           | 0.000 | 8203   | .28 | 036 |
|                                           | 4     |        | 931 |     |
| Daidzin                                   | 0.000 | 416.11 | 417 | 11. |
|                                           | 12    | 085    | .11 | 262 |
|                                           |       |        | 777 |     |
| 18-β-Glycyrrhetic acid                    | 0.000 | 470.3  | 469 | 20. |
|                                           | 14    | 3975   | .33 | 124 |
|                                           |       |        | 252 |     |
| Chlorogenic acid                          | 0.000 | 354.0  | 353 | 7.7 |
|                                           | 18    | 9526   | .08 | 02  |
|                                           |       |        | 795 |     |
| α-Eleostearic acid                        | -     | 278.2  | 279 | 19. |
|                                           | 0.000 | 2432   | .23 | 458 |
|                                           | 26    |        | 16  |     |
| (+/-)9,10-dihydroxy-12Z-octadecenoic acid | -     | 296.2  | 295 | 19. |
|                                           | 18.01 | 3528   | .22 | 467 |
|                                           | 043   |        | 8   |     |
| Glucose 1-phosphate                       | -     | 260.0  | 261 | 1.7 |
|                                           | 0.000 | 2966   | .03 | 02  |
|                                           | 05    |        | 693 |     |

|                                                                                                    |       |       |     |     |
|----------------------------------------------------------------------------------------------------|-------|-------|-----|-----|
| Tangeritin                                                                                         | -     | 372.1 | 373 | 17. |
|                                                                                                    | 0.000 | 2032  | .12 | 51  |
|                                                                                                    | 59    |       | 759 |     |
| 2-(2-amino-3-methylbutanamido)-3-phenylpropanoic acid                                              | -     | 264.1 | 265 | 8.0 |
|                                                                                                    | 0.000 | 4735  | .15 | 6   |
|                                                                                                    | 04    |       | 46  |     |
| (±)9(10)-DiHOME                                                                                    | 0.000 | 314.2 | 313 | 18. |
|                                                                                                    | 09    | 458   | .23 | 321 |
|                                                                                                    |       |       | 853 |     |
| 2-(Acetylamino)hexanoic acid                                                                       | -     | 173.1 | 172 | 10. |
|                                                                                                    | 0.000 | 0443  | .09 | 599 |
|                                                                                                    | 76    |       | 715 |     |
| Citric acid                                                                                        | -     | 192.0 | 191 | 2.7 |
|                                                                                                    | 0.000 | 2614  | .01 | 03  |
|                                                                                                    | 87    |       | 886 |     |
| Scoparone                                                                                          | 0.000 | 206.0 | 207 | 12. |
|                                                                                                    | 05    | 5795  | .06 | 473 |
|                                                                                                    |       |       | 523 |     |
| 18-β-Glycyrrhetic acid                                                                             | -     | 470.3 | 471 | 20. |
|                                                                                                    | 0.000 | 394   | .34 | 89  |
|                                                                                                    | 21    |       | 662 |     |
| Naringeninchalcone                                                                                 | -     | 272.0 | 273 | 12. |
|                                                                                                    | 0.000 | 6804  | .07 | 737 |
|                                                                                                    | 43    |       | 529 |     |
| 9-Oxo-10(E),12(E)-octadecadienoic acid                                                             | 0.000 | 294.2 | 295 | 19. |
|                                                                                                    | 04    | 1954  | .22 | 394 |
|                                                                                                    |       |       | 668 |     |
| Formononetin                                                                                       | 0.000 | 268.0 | 267 | 14. |
|                                                                                                    | 11    | 7367  | .06 | 645 |
|                                                                                                    |       |       | 647 |     |
| Nicotinamide                                                                                       | 0.000 | 122.0 | 123 | 2.1 |
|                                                                                                    | 24    | 4825  | .05 | 32  |
|                                                                                                    |       |       | 553 |     |
| Naringeninchalcone                                                                                 | -     | 272.0 | 273 | 11. |
|                                                                                                    | 0.000 | 678   | .07 | 898 |
|                                                                                                    | 68    |       | 507 |     |
| 7-(2-hydroxypropan-2-yl)-1,4a-dimethyl-1,2,3,4,4a,9,10,10a-octahydrophenanthrene-1-carboxylic acid | -     | 298.1 | 299 | 17. |
|                                                                                                    | 18.01 | 9325  | .20 | 909 |
|                                                                                                    | 059   |       | 053 |     |
| Naringeninchalcone                                                                                 | -     | 272.0 | 273 | 11. |
|                                                                                                    | 0.000 | 6802  | .07 | 636 |
|                                                                                                    | 45    |       | 529 |     |
| 7-Hydroxy-2-(4-hydroxyphenyl)-4-oxo-3,4-dihydro-2H-chromen-5-yl β-D-                               | -     | 434.1 | 433 | 13. |
|                                                                                                    | 0.000 | 2101  | .11 | 435 |

|                                                                                             |        |        |     |     |
|---------------------------------------------------------------------------------------------|--------|--------|-----|-----|
| glucopyranoside                                                                             | 29     |        | 389 |     |
| Daidzin                                                                                     | -      | 416.11 | 417 | 12. |
|                                                                                             | 0.000  | 066    | .11 | 405 |
|                                                                                             | 07     |        | 771 |     |
| Glycyl-L-leucine                                                                            | -      | 188.11 | 189 | 4.8 |
|                                                                                             | 0.000  | 607    | .12 | 37  |
|                                                                                             | 03     |        | 344 |     |
| Scopoletin                                                                                  | -      | 192.0  | 193 | 11. |
|                                                                                             | 0.000  | 4202   | .04 | 494 |
|                                                                                             | 24     |        | 939 |     |
| 18-β-Glycyrrhetic acid                                                                      | -      | 470.3  | 453 | 18. |
|                                                                                             | 0.000  | 3891   | .33 | 467 |
|                                                                                             | 7      |        | 56  |     |
| Licochalcone A                                                                              | -      | 338.1  | 339 | 17. |
|                                                                                             | 0.000  | 5138   | .15 | 804 |
|                                                                                             | 43     |        | 863 |     |
| 7-Hydroxy-2-(4-hydroxyphenyl)-4-oxo-<br>3,4-dihydro-2H-chromen-5-yl β-D-<br>glucopyranoside | -      | 434.1  | 433 | 11. |
|                                                                                             | 0.000  | 2106   | .11 | 63  |
|                                                                                             | 24     |        | 386 |     |
| 4-Hydroxybenzoic acid                                                                       | -      | 138.0  | 137 | 8.4 |
|                                                                                             | 0.001  | 3062   | .02 | 75  |
|                                                                                             | 07     |        | 335 |     |
| Dipentyl phthalate                                                                          | -      | 306.1  | 307 | 25. |
|                                                                                             | 0.000  | 8279   | .19 | 674 |
|                                                                                             | 32     |        | 003 |     |
| Docosanamide                                                                                | -      | 339.3  | 340 | 25. |
|                                                                                             | 0.000  | 4964   | .35 | 734 |
|                                                                                             | 47     |        | 693 |     |
| Adenine                                                                                     | 0.000  | 135.0  | 136 | 4.8 |
|                                                                                             | 07     | 5457   | .06 | 22  |
|                                                                                             |        |        | 184 |     |
| Thymidine                                                                                   | 0.000  | 242.0  | 241 | 6.5 |
|                                                                                             | 24     | 9051   | .08 | 56  |
|                                                                                             |        |        | 293 |     |
| 18-β-Glycyrrhetic acid                                                                      | -      | 470.3  | 453 | 19. |
|                                                                                             | 0.000  | 39     | .33 | 002 |
|                                                                                             | 61     |        | 569 |     |
| Methylsuccinic acid                                                                         | -      | 132.0  | 131 | 6.1 |
|                                                                                             | 0.0011 | 4114   | .03 | 66  |
|                                                                                             | 2      |        | 386 |     |
| Catechin                                                                                    | 0.000  | 290.0  | 289 | 9.0 |
|                                                                                             | 31     | 7935   | .07 | 87  |
|                                                                                             |        |        | 224 |     |
| Glycitin                                                                                    | -      | 446.1  | 447 | 14. |

|                                                                                                                             |        |        |     |     |
|-----------------------------------------------------------------------------------------------------------------------------|--------|--------|-----|-----|
|                                                                                                                             | 0.000  | 2093   | .12 | 469 |
|                                                                                                                             | 37     |        | 82  |     |
| Azelaic acid                                                                                                                | -      | 188.1  | 187 | 14. |
|                                                                                                                             | 0.000  | 0422   | .09 | 076 |
|                                                                                                                             | 64     |        | 691 |     |
| Stearamide                                                                                                                  | -      | 283.2  | 284 | 22. |
|                                                                                                                             | 0.000  | 8743   | .29 | 742 |
|                                                                                                                             | 08     |        | 471 |     |
| L-Histidine                                                                                                                 | -      | 155.0  | 154 | 1.3 |
|                                                                                                                             | 0.0011 | 6837   | .06 | 25  |
|                                                                                                                             |        |        | 11  |     |
| (2Z)-6-hydroxy-2-[(4-hydroxy-3-methoxyphenyl)methylidene]-2,3-dihydro-1-benzofuran-3-one                                    | -      | 284.0  | 285 | 14. |
|                                                                                                                             | 0.000  | 6843   | .07 | 421 |
|                                                                                                                             | 05     |        | 562 |     |
| 7-Hydroxy-2-(4-hydroxyphenyl)-4-oxo-3,4-dihydro-2H-chromen-5-yl $\beta$ -D-glucopyranoside                                  | -      | 434.1  | 433 | 12. |
|                                                                                                                             | 0.000  | 2114   | .11 | 737 |
|                                                                                                                             | 16     |        | 389 |     |
| Didecyl phthalate                                                                                                           | -      | 446.3  | 447 | 25. |
|                                                                                                                             | 0.000  | 3899   | .34 | 671 |
|                                                                                                                             | 62     |        | 622 |     |
| DL-Homoserine                                                                                                               | 0.000  | 119.05 | 120 | 1.2 |
|                                                                                                                             | 26     | 851    | .06 | 94  |
|                                                                                                                             |        |        | 577 |     |
| Isokaempferide                                                                                                              | -      | 300.0  | 301 | 16. |
|                                                                                                                             | 0.000  | 6307   | .07 | 271 |
|                                                                                                                             | 32     |        | 034 |     |
| Bis(3,5,5-trimethylhexyl) phthalate                                                                                         | -      | 418.3  | 419 | 24. |
|                                                                                                                             | 0.000  | 077    | .31 | 25  |
|                                                                                                                             | 61     |        | 485 |     |
| Cyclo(leucylprolyl)                                                                                                         | -      | 210.1  | 211 | 11. |
|                                                                                                                             | 0.000  | 368    | .14 | 239 |
|                                                                                                                             | 03     |        | 407 |     |
| Daidzein                                                                                                                    | -      | 254.0  | 255 | 15. |
|                                                                                                                             | 0.000  | 5769   | .06 | 364 |
|                                                                                                                             | 22     |        | 491 |     |
| 5-Hydroxymethyl-2-furaldehyde                                                                                               | 0.000  | 126.0  | 127 | 5.9 |
|                                                                                                                             | 27     | 3197   | .03 | 87  |
|                                                                                                                             |        |        | 924 |     |
| Wogonin                                                                                                                     | -      | 284.0  | 285 | 16. |
|                                                                                                                             | 0.000  | 6818   | .07 | 738 |
|                                                                                                                             | 29     |        | 541 |     |
| (3 $\beta$ ,9 $\alpha$ ,12 $\beta$ ,17 $\alpha$ )-20-[[6-O-( $\beta$ -D-Glucopyranosyl)- $\beta$ -D-glucopyranosyl]oxy]-12- | 1200.  | 2309.  | 115 | 17. |
|                                                                                                                             | 61523  | 21817  | 3.6 | 714 |
|                                                                                                                             |        |        | 018 |     |

|                                                                                                 |       |       |     |     |
|-------------------------------------------------------------------------------------------------|-------|-------|-----|-----|
| hydroxydammar-24-en-3-yl 2-O-beta-D-glucopyranosyl-beta-D-glucopyranoside                       |       |       |     | 1   |
| Catechin                                                                                        | 0.000 | 290.0 | 289 | 10. |
|                                                                                                 | 31    | 7934  | .07 | 332 |
|                                                                                                 |       |       | 233 |     |
| Osthol                                                                                          | -     | 244.1 | 245 | 17. |
|                                                                                                 | 0.000 | 097   | .11 | 326 |
|                                                                                                 | 25    |       | 697 |     |
| DL-Tryptophan                                                                                   | -     | 204.0 | 203 | 7.2 |
|                                                                                                 | 0.000 | 8943  | .08 | 89  |
|                                                                                                 | 45    |       | 212 |     |
| Daidzein                                                                                        | -     | 254.0 | 255 | 14. |
|                                                                                                 | 0.000 | 5757  | .06 | 675 |
|                                                                                                 | 34    |       | 477 |     |
| Acetylarginine                                                                                  | 0.000 | 216.1 | 217 | 1.4 |
|                                                                                                 | 05    | 2229  | .12 | 93  |
|                                                                                                 |       |       | 956 |     |
| 4-(8-Isopropenyl-3,4,8,9-tetrahydro-2H-furo[2,3-H]chromen-3-yl)-1,3-benzenediol                 | -     | 324.1 | 325 | 17. |
|                                                                                                 | 0.000 | 3598  | .14 | 62  |
|                                                                                                 | 18    |       | 31  |     |
| Norharman                                                                                       | 18.01 | 186.0 | 169 | 8.7 |
|                                                                                                 | 074   | 7949  | .07 | 48  |
|                                                                                                 |       |       | 62  |     |
| 1,4a-dimethyl-9-oxo-7-(propan-2-yl)-1,2,3,4,4a,9,10,10a-octahydrophenanthrene-1-carboxylic acid | -     | 314.1 | 315 | 18. |
|                                                                                                 | 0.000 | 8784  | .19 | 817 |
|                                                                                                 | 35    |       | 513 |     |
| Glycitin                                                                                        | -     | 446.1 | 447 | 13. |
|                                                                                                 | 0.000 | 2127  | .12 | 301 |
|                                                                                                 | 03    |       | 83  |     |
| (+/-)-9-HpODE                                                                                   | 0.000 | 312.2 | 311 | 18. |
|                                                                                                 | 24    | 303   | .22 | 221 |
|                                                                                                 |       |       | 302 |     |
| 1-Stearoylglycerol                                                                              | -     | 358.3 | 381 | 23. |
|                                                                                                 | 0.000 | 0753  | .29 | 046 |
|                                                                                                 | 78    |       | 666 |     |
| Neochlorogenic acid                                                                             | 0.000 | 354.0 | 353 | 8.2 |
|                                                                                                 | 2     | 9528  | .08 | 72  |
|                                                                                                 |       |       | 804 |     |
| Leucylproline                                                                                   | 0.000 | 228.1 | 229 | 6.9 |
|                                                                                                 | 2     | 476   | .15 | 89  |
|                                                                                                 |       |       | 489 |     |
| (2E)-3-(3,4-dihydroxy-2-methoxyphenyl)-1-(4-hydroxyphenyl)prop-2-en-1-one                       | 0.000 | 286.0 | 285 | 14. |
|                                                                                                 | 08    | 8421  | .07 | 002 |
|                                                                                                 |       |       | 715 |     |

|                                                                                                                                                           |       |        |     |     |
|-----------------------------------------------------------------------------------------------------------------------------------------------------------|-------|--------|-----|-----|
| D-(+)-Pipicolinic acid                                                                                                                                    | -     | 112.05 | 130 | 1.7 |
|                                                                                                                                                           | 17.02 | 262    | .08 | 64  |
|                                                                                                                                                           | 636   |        | 644 |     |
| Didecyl phthalate                                                                                                                                         | -     | 446.3  | 447 | 25. |
|                                                                                                                                                           | 0.000 | 3915   | .34 | 365 |
|                                                                                                                                                           | 46    |        | 637 |     |
| D-(-)-Quinic acid                                                                                                                                         | -     | 192.0  | 191 | 1.5 |
|                                                                                                                                                           | 0.000 | 6258   | .05 | 14  |
|                                                                                                                                                           | 81    |        | 528 |     |
| D-(+)-Pyroglutamic Acid                                                                                                                                   | 0.000 | 129.0  | 130 | 2.6 |
|                                                                                                                                                           | 17    | 4276   | .05 | 74  |
|                                                                                                                                                           |       |        | 006 |     |
| D-(+)-Pyroglutamic Acid                                                                                                                                   | 0.000 | 129.0  | 130 | 2.2 |
|                                                                                                                                                           | 1     | 4269   | .04 | 94  |
|                                                                                                                                                           |       |        | 999 |     |
| $\alpha$ -Aspartylphenylalanine                                                                                                                           | 0.000 | 280.1  | 281 | 7.2 |
|                                                                                                                                                           | 04    | 0596   | .11 | 76  |
|                                                                                                                                                           |       |        | 316 |     |
| 4-Aminobenzoic acid                                                                                                                                       | 0.000 | 137.0  | 138 | 6.4 |
|                                                                                                                                                           | 22    | 479    | .05 | 23  |
|                                                                                                                                                           |       |        | 516 |     |
| 3-(4-hydroxyphenyl)-5-methoxy-7-<br>{[(2S,3R,4S,5S,6R)-3,4,5-trihydroxy-6-<br>(hydroxymethyl)oxan-2-yl]oxy}-4H-<br>chromen-4-one                          | -     | 446.1  | 447 | 11. |
|                                                                                                                                                           | 0.000 | 2093   | .12 | 807 |
|                                                                                                                                                           | 37    |        | 82  |     |
| Adenosine 3'5'-cyclic monophosphate                                                                                                                       | 0.000 | 329.0  | 330 | 5.0 |
|                                                                                                                                                           | 08    | 526    | .05 | 28  |
|                                                                                                                                                           |       |        | 981 |     |
| Anabasine                                                                                                                                                 | -     | 145.0  | 163 | 2.3 |
|                                                                                                                                                           | 17.02 | 8916   | .12 |     |
|                                                                                                                                                           | 653   |        | 299 |     |
| octadec-9-ynoic acid                                                                                                                                      | -     | 262.2  | 263 | 21. |
|                                                                                                                                                           | 18.01 | 2937   | .23 | 457 |
|                                                                                                                                                           | 086   |        | 663 |     |
| Guanine                                                                                                                                                   | 0.000 | 151.0  | 152 | 1.7 |
|                                                                                                                                                           | 09    | 495    | .05 | 58  |
|                                                                                                                                                           |       |        | 676 |     |
| Naringenin                                                                                                                                                | -     | 272.0  | 273 | 13. |
|                                                                                                                                                           | 0.000 | 6789   | .07 | 458 |
|                                                                                                                                                           | 59    |        | 516 |     |
| (4S)-4-hydroxy-3,5,5-trimethyl-4-[(1E)-<br>3-{[(2R,3R,4S,5S,6R)-3,4,5-trihydroxy-<br>6-(hydroxymethyl)oxan-2-yl]oxy}but-1-<br>en-1-yl]cyclohex-2-en-1-one | 0.000 | 386.1  | 431 | 10. |
|                                                                                                                                                           | 14    | 942    | .19 | 495 |
|                                                                                                                                                           |       |        | 247 |     |



|                                                                                                                                                                             |       |        |     |     |
|-----------------------------------------------------------------------------------------------------------------------------------------------------------------------------|-------|--------|-----|-----|
| Naringenin                                                                                                                                                                  | 0.000 | 272.0  | 273 | 10. |
|                                                                                                                                                                             | 03    | 685    | .07 | 643 |
|                                                                                                                                                                             |       |        | 578 |     |
| 6-Hydroxy-5a,9-dimethyl-3-methylene-3a,4,5,5a,6,7,9a,9b-octahydronaphtho[1,2-b]furan-2(3H)-one                                                                              | -     | 248.1  | 249 | 14. |
| 5,7-Dihydroxy-2-(4-hydroxyphenyl)-6,8-bis[3,4,5-trihydroxy-6-(hydroxymethyl)tetrahydro-2H-pyran-2-yl]-4H-chromen-4-one                                                      | 0.000 | 4094   | .14 | 545 |
|                                                                                                                                                                             | 3     |        | 821 |     |
| (2R,3R,4S,5S,6R)-2-[(3Z)-hex-3-en-1-yloxy]-6-(hydroxymethyl)oxane-3,4,5-triol                                                                                               | -     | 594.1  | 593 | 10. |
| Cyclo(phenylalanyl-prolyl)                                                                                                                                                  | 0.000 | 5845   | .15 | 919 |
|                                                                                                                                                                             | 02    |        | 161 |     |
|                                                                                                                                                                             | 21.98 | 284.1  | 285 | 12. |
|                                                                                                                                                                             | 182   | 2346   | .13 | 908 |
|                                                                                                                                                                             |       |        | 074 |     |
|                                                                                                                                                                             | -     | 244.1  | 245 | 11. |
|                                                                                                                                                                             | 0.000 | 2071   | .12 | 907 |
|                                                                                                                                                                             | 46    |        | 799 |     |
| 4-[(3R)-5,7-dimethoxy-6-(3-methylbut-2-en-1-yl)-3,4-dihydro-2H-1-benzopyran-3-yl]-2-(3-methylbut-2-en-1-yl)benzene-1,3-diol                                                 | -     | 438.2  | 439 | 19. |
| (±)13-HpODE                                                                                                                                                                 | 0.000 | 404    | .24 | 636 |
|                                                                                                                                                                             | 22    |        | 768 |     |
|                                                                                                                                                                             | -     | 294.2  | 295 | 16. |
|                                                                                                                                                                             | 18.01 | 1926   | .22 | 53  |
|                                                                                                                                                                             | 08    |        | 653 |     |
| Tolycaine                                                                                                                                                                   | 0.000 | 278.1  | 279 | 9.4 |
|                                                                                                                                                                             | 21    | 6326   | .17 | 03  |
|                                                                                                                                                                             |       |        | 053 |     |
| 5,7-dihydroxy-2-(4-hydroxyphenyl)-6-[(2S,3R,4R,5S,6R)-3,4,5-trihydroxy-6-(hydroxymethyl)oxan-2-yl]-8-[(2S,3R,4R,5R,6S)-3,4,5-trihydroxy-6-methyloxan-2-yl]-4H-chromen-4-one | -     | 578.1  | 577 | 12. |
| Choline                                                                                                                                                                     | 0.000 | 6321   | .15 | 695 |
|                                                                                                                                                                             | 35    |        | 637 |     |
|                                                                                                                                                                             | 0.000 | 103.1  | 104 | 1.2 |
|                                                                                                                                                                             | 42    | 0013   | .10 | 57  |
|                                                                                                                                                                             |       |        | 741 |     |
| DL-Arginine                                                                                                                                                                 | -     | 174.11 | 175 | 1.3 |
|                                                                                                                                                                             | 0.000 | 159    | .11 | 2   |
|                                                                                                                                                                             | 08    |        | 887 |     |
| ginsenoside Rh2                                                                                                                                                             | 0.000 | 162.11 | 163 | 7.1 |
|                                                                                                                                                                             | 07    | 577    | .12 | 99  |
|                                                                                                                                                                             |       |        | 305 |     |
| 1,2,3-cyclopropanetricarboxylic acid                                                                                                                                        | -     | 174.0  | 173 | 4.9 |
|                                                                                                                                                                             | 0.000 | 1556   | .00 | 73  |
|                                                                                                                                                                             | 88    |        | 829 |     |
| 15-(5-hydroxy-6-methylhept-6-en-2-yl)-                                                                                                                                      | -     | 424.3  | 407 | 20. |

|                                                                                          |        |        |     |     |
|------------------------------------------------------------------------------------------|--------|--------|-----|-----|
| 7,7,12,16-                                                                               | 18.011 | 7007   | .36 | 185 |
| tetramethylpentacyclo[9.7.0.0.0.0.0]octadecan-6-ol                                       | 01     |        | 682 |     |
| 1,5-Anhydro-1-[5,7-dihydroxy-2-(4-hydroxyphenyl)-4-oxo-4H-chromen-6-yl]hexitol           | 0.000  | 432.1  | 433 | 12. |
| Vanillin                                                                                 | 01     | 0565   | .11 | 559 |
|                                                                                          |        |        | 282 |     |
|                                                                                          | 0.000  | 152.0  | 153 | 10. |
|                                                                                          | 01     | 4735   | .05 | 578 |
|                                                                                          |        |        | 463 |     |
| (2Z)-6-hydroxy-2-[(4-hydroxy-3-methoxyphenyl)methylidene]-2,3-dihydro-1-benzofuran-3-one | -      | 284.0  | 285 | 15. |
| (+/-)12(13)-DiHOME                                                                       | 0.000  | 682    | .07 | 018 |
|                                                                                          | 27     |        | 535 |     |
|                                                                                          | -      | 296.2  | 295 | 22. |
|                                                                                          | 18.01  | 3543   | .22 | 175 |
|                                                                                          | 028    |        | 815 |     |
| 1-Linoleoyl glycerol                                                                     | -      | 354.2  | 377 | 21. |
|                                                                                          | 0.000  | 7642   | .26 | 456 |
|                                                                                          | 59     |        | 572 |     |
| Corchorifatty acid F                                                                     | -      | 328.2  | 327 | 16. |
|                                                                                          | 0.000  | 2472   | .21 | 411 |
|                                                                                          | 25     |        | 771 |     |
| 2,4,5-Trimethoxybenzaldehyde                                                             | 0.000  | 196.0  | 197 | 12. |
|                                                                                          | 07     | 7363   | .08 | 824 |
|                                                                                          |        |        | 09  |     |
| Asparagine                                                                               | 0.000  | 132.0  | 133 | 1.5 |
|                                                                                          | 05     | 5354   | .06 | 74  |
|                                                                                          |        |        | 082 |     |
| 15-(5-hydroxy-6-methylhept-6-en-2-yl)-7,7,12,16-                                         | -      | 424.3  | 407 | 20. |
| tetramethylpentacyclo[9.7.0.0.0.0.0]octadecan-6-ol                                       | 18.01  | 7016   | .36 | 887 |
| Corymboside                                                                              | 093    |        | 688 |     |
|                                                                                          | -      | 564.1  | 565 | 11. |
|                                                                                          | 0.000  | 4754   | .15 | 689 |
|                                                                                          | 37     |        | 46  |     |
| 2-(6-Hydroxyhexyl)-3-methylenesuccinic acid                                              | -      | 230.11 | 229 | 14. |
|                                                                                          | 0.000  | 53     | .10 | 336 |
|                                                                                          | 12     |        | 799 |     |
| Gentisic acid                                                                            | -      | 154.0  | 153 | 7.3 |
|                                                                                          | 0.000  | 2562   | .01 | 41  |
|                                                                                          | 99     |        | 834 |     |
| trans-3-Indoleacrylic acid                                                               | -      | 187.0  | 188 | 7.2 |
|                                                                                          | 0.000  | 6322   | .07 | 94  |
|                                                                                          | 1      |        | 048 |     |
| Gluconic acid                                                                            | -      | 150.0  | 195 | 1.3 |



|                                                                                                                                                                                                                                                                                                                                                                                                                                                                   |       |       |     |     |
|-------------------------------------------------------------------------------------------------------------------------------------------------------------------------------------------------------------------------------------------------------------------------------------------------------------------------------------------------------------------------------------------------------------------------------------------------------------------|-------|-------|-----|-----|
| {[(2S,3R,4S,5S,6R)-3,4,5-trihydroxy-6-(hydroxymethyl)oxan-2-yl]oxy}-1H,4aH,5H,7aH-cyclopenta[c]pyran-4-carboxylic acid                                                                                                                                                                                                                                                                                                                                            |       |       | 196 |     |
| (2S,3R,4S,5S,6R)-2- {[ (2R,3R,4S,5S,6R)-4,5-dihydroxy-2- {[ (2R,5S,10R,11R,14S,15R,16R)-16-hydroxy-2,6,6,10,11-pentamethyl-14-[(2S)-6-methyl-2- {[ (2S,3R,4S,5S,6R)-3,4,5-trihydroxy-6- ( [(2R,3R,4S,5S)-4-hydroxy-5-(hydroxymethyl)-3- {[ (2S,3R,4S,5R)-3,4,5-trihydroxyoxan-2-yl]oxy } oxolan-2-yl]oxy } methyl)oxan-2-yl]oxy } hept-5-en-2-yl]tetracyclo[8.7.0.0.0.0]heptadecan-5-yl]oxy }-6-(hydroxymethyl)oxan-3-yl]oxy }-6-(hydroxymethyl)oxane-3,4,5-triol | 46.00 | 1256. | 125 | 17. |
| Levallorphan                                                                                                                                                                                                                                                                                                                                                                                                                                                      | 639   | 64102 | 5.6 | 486 |
|                                                                                                                                                                                                                                                                                                                                                                                                                                                                   |       |       | 337 |     |
|                                                                                                                                                                                                                                                                                                                                                                                                                                                                   |       |       | 9   |     |
|                                                                                                                                                                                                                                                                                                                                                                                                                                                                   | -     | 283.1 | 284 | 12. |
|                                                                                                                                                                                                                                                                                                                                                                                                                                                                   | 0.000 | 9341  | .20 | 663 |
|                                                                                                                                                                                                                                                                                                                                                                                                                                                                   | 21    |       | 068 |     |
| D-(+)-Pipicolinic acid                                                                                                                                                                                                                                                                                                                                                                                                                                            | 0.000 | 129.0 | 130 | 1.5 |
|                                                                                                                                                                                                                                                                                                                                                                                                                                                                   | 14    | 7912  | .08 | 71  |
|                                                                                                                                                                                                                                                                                                                                                                                                                                                                   |       |       | 638 |     |
| 4-[(3S)-7-hydroxy-8-(3-methylbut-2-en-1-yl)-3,4-dihydro-2H-1-benzopyran-3-yl]benzene-1,3-diol                                                                                                                                                                                                                                                                                                                                                                     | -     | 326.1 | 327 | 15. |
|                                                                                                                                                                                                                                                                                                                                                                                                                                                                   | 0.000 | 5138  | .15 | 939 |
|                                                                                                                                                                                                                                                                                                                                                                                                                                                                   | 42    |       | 866 |     |
| Oleanolic acid                                                                                                                                                                                                                                                                                                                                                                                                                                                    | -     | 438.3 | 439 | 22. |
|                                                                                                                                                                                                                                                                                                                                                                                                                                                                   | 18.01 | 4951  | .35 | 076 |
|                                                                                                                                                                                                                                                                                                                                                                                                                                                                   | 083   |       | 678 |     |
| methyl 2-(1,3,5-trihydroxy-4a-methyl-8-oxo-decahydronaphthalen-2-yl)prop-2-enoate                                                                                                                                                                                                                                                                                                                                                                                 | 37.95 | 336.0 | 337 | 16. |
|                                                                                                                                                                                                                                                                                                                                                                                                                                                                   | 747   | 9911  | .10 | 874 |
|                                                                                                                                                                                                                                                                                                                                                                                                                                                                   |       |       | 638 |     |
| 5-Methoxysalicylic acid                                                                                                                                                                                                                                                                                                                                                                                                                                           | 0.000 | 168.0 | 169 | 9.3 |
|                                                                                                                                                                                                                                                                                                                                                                                                                                                                   | 19    | 4245  | .04 | 92  |
|                                                                                                                                                                                                                                                                                                                                                                                                                                                                   |       |       | 973 |     |
| Tolycaine                                                                                                                                                                                                                                                                                                                                                                                                                                                         | -     | 237.1 | 279 | 9.9 |
|                                                                                                                                                                                                                                                                                                                                                                                                                                                                   | 41.02 | 3658  | .17 | 39  |
|                                                                                                                                                                                                                                                                                                                                                                                                                                                                   | 647   |       | 041 |     |
| 2-(acetylamino)-3-(1H-indol-3-yl)propanoic acid                                                                                                                                                                                                                                                                                                                                                                                                                   | -     | 246.1 | 245 | 11. |
|                                                                                                                                                                                                                                                                                                                                                                                                                                                                   | 0.000 | 0026  | .09 | 768 |
|                                                                                                                                                                                                                                                                                                                                                                                                                                                                   | 18    |       | 299 |     |
| Levallorphan                                                                                                                                                                                                                                                                                                                                                                                                                                                      | -     | 283.1 | 284 | 13. |
|                                                                                                                                                                                                                                                                                                                                                                                                                                                                   | 0.000 | 9313  | .20 | 519 |

|                                                                                                                                   |                   |               |            |            |
|-----------------------------------------------------------------------------------------------------------------------------------|-------------------|---------------|------------|------------|
|                                                                                                                                   | 48                |               | 041        |            |
| 4-(3,4-dihydro-2H-1,5-benzodioxepin-7-ylmethyl)-1lambda~6~,4-thiazinane-1,1-dione                                                 | 21.98<br>046      | 319.0<br>8394 | 320<br>.09 | 11.<br>449 |
| Phenacetin                                                                                                                        | 0.000<br>21       | 179.0<br>9484 | 180<br>.10 | 3.8<br>78  |
|                                                                                                                                   |                   |               | 211        |            |
| 8-(2,3-dihydroxy-3-methylbutyl)-7-methoxy-2H-chromen-2-one                                                                        | -<br>18.01<br>074 | 260.1<br>0468 | 243<br>.10 | 14.<br>829 |
| Benzylpiperazine                                                                                                                  | 0.000<br>15       | 176.1<br>315  | 177<br>.13 | 7.8<br>07  |
|                                                                                                                                   |                   |               | 878        |            |
| Hexadecanamide                                                                                                                    | -<br>0.000<br>27  | 255.2<br>5594 | 256<br>.26 | 21.<br>563 |
|                                                                                                                                   |                   |               | 321        |            |
| Agmatine                                                                                                                          | 0.000<br>08       | 130.1<br>2193 | 131<br>.12 | 1.1<br>35  |
|                                                                                                                                   |                   |               | 918        |            |
| (15Z)-9,12,13-Trihydroxy-15-octadecenoic acid                                                                                     | -<br>0.000<br>05  | 330.2<br>4057 | 329<br>.23 | 16.<br>36  |
|                                                                                                                                   |                   |               | 334        |            |
| 2'-O-Methylguanosine                                                                                                              | 0.000<br>39       | 297.1<br>0771 | 298<br>.11 | 6.6<br>19  |
|                                                                                                                                   |                   |               | 499        |            |
| 4-[(3R)-7-hydroxy-5-methoxy-6-(3-methylbut-2-en-1-yl)-3,4-dihydro-2H-1-benzopyran-3-yl]-2-(3-methylbut-2-en-1-yl)benzene-1,3-diol | -<br>0.000<br>38  | 424.2<br>246  | 425<br>.23 | 17.<br>96  |
|                                                                                                                                   |                   |               | 187        |            |
| Roxithromycin                                                                                                                     | 37.94<br>325      | 874.4<br>6782 | 875<br>.47 | 21.<br>57  |
|                                                                                                                                   |                   |               | 51         |            |
| (11E,15Z)-9,10,13-trihydroxyoctadeca-11,15-dienoic acid                                                                           | -<br>18.01<br>074 | 310.2<br>1424 | 293<br>.21 | 17.<br>306 |
|                                                                                                                                   |                   |               | 088        |            |
| Schaftoside                                                                                                                       | 0.000<br>13       | 564.1<br>4803 | 565<br>.15 | 10.<br>999 |
|                                                                                                                                   |                   |               | 509        |            |
| 4-Hydroxybenzaldehyde                                                                                                             | 0.000<br>32       | 122.0<br>371  | 123<br>.04 | 7.7<br>17  |
|                                                                                                                                   |                   |               | 437        |            |
| 7-Hydroxycoumarine                                                                                                                | 0.000<br>02       | 162.0<br>3171 | 163<br>.03 | 11.<br>307 |
|                                                                                                                                   |                   |               | 899        |            |

|                                                                                                                             |        |        |     |     |
|-----------------------------------------------------------------------------------------------------------------------------|--------|--------|-----|-----|
| 2-Methylbenzoic acid                                                                                                        | -      | 136.0  | 135 | 7.7 |
|                                                                                                                             | 0.0011 | 5125   | .04 | 13  |
|                                                                                                                             | 8      |        | 395 |     |
| (+/-)-Cannabichromeorcin                                                                                                    | -      | 258.1  | 259 | 22. |
|                                                                                                                             | 0.000  | 6185   | .16 | 239 |
|                                                                                                                             | 13     |        | 913 |     |
| Corymboside                                                                                                                 | -      | 271.0  | 565 | 12. |
|                                                                                                                             | 293.0  | 8268   | .15 | 222 |
|                                                                                                                             | 6523   |        | 454 |     |
| Caffeic acid                                                                                                                | -      | 180.0  | 179 | 7.7 |
|                                                                                                                             | 0.000  | 416    | .03 | 1   |
|                                                                                                                             | 66     |        | 424 |     |
| 5,10,15-trimethyl-4,9,13-trioxatetracyclo[10.3.0.0.0]pentadec-1(15)-en-14-one                                               | -      | 246.1  | 247 | 13. |
| (1R,2R,6R,9R)-2,11,11-trimethyl-3-oxotricyclo[4.3.2.0]undecane-9-carboxylic acid                                            | 18.01  | 2547   | .13 | 805 |
|                                                                                                                             | 069    |        | 261 |     |
| 6-formyl-10-(hydroxymethyl)-5-methoxy-3-methylidene-2-oxo-2H,3H,3aH,4H,5H,8H,9H,11aH-cyclodeca[b]furan-4-yl methylbutanoate | -      | 232.1  | 233 | 17. |
| Ethyl levulinate                                                                                                            | 18.01  | 4596   | .15 | 5   |
|                                                                                                                             | 094    |        | 323 |     |
|                                                                                                                             | 21.98  | 414.1  | 415 | 17. |
|                                                                                                                             | 403    | 6753   | .17 | 164 |
|                                                                                                                             |        |        | 48  |     |
| Ethyl levulinate                                                                                                            | -      | 112.05 | 113 | 7.8 |
|                                                                                                                             | 32.02  | 284    | .06 | 6   |
|                                                                                                                             | 58     |        | 013 |     |
| Osajin                                                                                                                      | -      | 404.1  | 405 | 20. |
|                                                                                                                             | 0.000  | 6202   | .16 | 576 |
|                                                                                                                             | 35     |        | 925 |     |
| Ethyl levulinate                                                                                                            | 0.000  | 144.0  | 127 | 7.0 |
|                                                                                                                             | 33     | 7897   | .07 | 11  |
|                                                                                                                             |        |        | 57  |     |
| 2-Methylbenzoic acid                                                                                                        | -      | 136.0  | 135 | 9.3 |
|                                                                                                                             | 0.0011 | 5127   | .04 | 13  |
|                                                                                                                             | 6      |        | 387 |     |
| Phenacetin                                                                                                                  | 179.0  | 358.1  | 180 | 5.1 |
|                                                                                                                             | 9486   | 8949   | .10 | 32  |
|                                                                                                                             |        |        | 202 |     |
| $\omega$ -Hydroxynorfentanyl                                                                                                | 0.000  | 248.1  | 249 | 7.2 |
|                                                                                                                             | 05     | 5253   | .15 | 62  |
|                                                                                                                             |        |        | 981 |     |
| Genistin                                                                                                                    | -      | 432.1  | 433 | 12. |
|                                                                                                                             | 0.000  | 0512   | .11 | 193 |
|                                                                                                                             | 53     |        | 24  |     |

|                                                                               |                   |               |            |            |
|-------------------------------------------------------------------------------|-------------------|---------------|------------|------------|
| diethyl 2-[(4-methoxy-2-nitroanilino)methylidene]malonate                     | 18.01<br>484      | 356.1<br>2624 | 337<br>.10 | 17.<br>877 |
| 4-Hydroxybenzaldehyde                                                         | 0.000<br>2        | 122.0<br>3698 | 123<br>.04 | 15.<br>531 |
| Cuminaldehyde                                                                 | -<br>0.000<br>06  | 148.0<br>8875 | 149<br>.09 | 17.<br>182 |
| $\alpha$ -Linolenic acid                                                      | -<br>0.000<br>08  | 278.2<br>245  | 279<br>.23 | 21.<br>5   |
| diethyl 2-[(4-methoxy-2-nitroanilino)methylidene]malonate                     | 0.004<br>24       | 338.11<br>564 | 337<br>.10 | 16.<br>107 |
| Aflatoxin B2                                                                  | -<br>0.000<br>47  | 314.0<br>7857 | 315<br>.08 | 14.<br>649 |
| 5-hydroxy-2-(4-hydroxyphenyl)-8,8-dimethyl-4H,8H-pyrano[3,2-g]chromen-4-one   | -<br>0.000<br>61  | 336.0<br>9916 | 337<br>.10 | 18.<br>334 |
| Isocitric acid                                                                | -<br>0.000<br>73  | 192.0<br>2627 | 191<br>.01 | 1.6<br>01  |
| 5,10,15-trimethyl-4,9,13-trioxatetracyclo[10.3.0.0.0]pentadec-1(15)-en-14-one | -<br>0.000<br>05  | 264.1<br>3611 | 247<br>.13 | 15.<br>581 |
| 2-Phenoxypropanoic acid                                                       | -<br>0.0011<br>1  | 166.0<br>6189 | 165<br>.05 | 9.2<br>91  |
| (+/-)12(13)-DiHOME                                                            | -<br>18.01<br>067 | 296.2<br>3504 | 297<br>.24 | 20.<br>109 |
| Hexanoic acid                                                                 | -<br>0.001<br>28  | 116.08<br>245 | 115<br>.07 | 12.<br>636 |
| Bis(3,5,5-trimethylhexyl) phthalate                                           | -<br>0.000<br>44  | 418.3<br>0787 | 419<br>.31 | 23.<br>522 |
| Jasmonic acid                                                                 | -<br>0.000<br>52  | 210.1<br>2507 | 209<br>.11 | 16.<br>307 |
| Arecoline                                                                     | 0.000<br>19       | 155.0<br>9482 | 156<br>.10 | 8.1<br>18  |

|                                                                                                                                                                          |                   |               |            |            |
|--------------------------------------------------------------------------------------------------------------------------------------------------------------------------|-------------------|---------------|------------|------------|
|                                                                                                                                                                          |                   |               | 21         |            |
| 3-(3,4-dimethoxyphenethyl)-2-[(4-isopropylphenyl)imino]-1,3-thiazolan-4-one                                                                                              | 0.006<br>18       | 398.1<br>7259 | 399<br>.17 | 18.<br>206 |
| (2S,4aS,6aS,6bR,10S,12aS,14bS)-10-hydroxy-2,4a,6a,6b,9,9,12a-heptamethyl-13-oxo-1,2,3,4,4a,5,6,6a,6b,7,8,8a,9,10,11,12,12a,12b,13,14b-icosahydronicene-2-carboxylic acid | 18.01<br>072      | 488.3<br>5033 | 471<br>.34 | 20.<br>086 |
| 4,5-Dicaffeoylquinic acid                                                                                                                                                | 0.000<br>14       | 516.1<br>2692 | 515<br>.11 | 12.<br>603 |
| Prolylleucine                                                                                                                                                            | 0.000<br>24       | 228.1<br>4763 | 229<br>.15 | 5.5<br>65  |
| Ageratriol                                                                                                                                                               | -<br>18.01<br>069 | 234.1<br>6185 | 235<br>.16 | 12.<br>966 |
| (2E)-3-[4-({2-O-[(2S,3R,4R)-3,4-Dihydroxy-4-(hydroxymethyl)tetrahydro-2-furanyl]-β-D-glucopyranosyl}oxy)-3-methoxyphenyl]acrylic acid                                    | 0.000<br>65       | 488.1<br>5364 | 487<br>.14 | 10.<br>194 |
| Gentisic acid                                                                                                                                                            | -<br>0.000<br>91  | 154.0<br>2569 | 153<br>.01 | 10.<br>174 |
| 3-tert-Butyladipic acid                                                                                                                                                  | -<br>0.000<br>53  | 202.11<br>998 | 201<br>.11 | 14.<br>668 |
| N-Acetylhistamine                                                                                                                                                        | 0                 | 153.0<br>9021 | 154<br>.09 | 1.2<br>51  |
| 12-Oxo phytodienoic acid                                                                                                                                                 | -<br>0.000<br>15  | 292.2<br>0369 | 293<br>.21 | 18.<br>744 |
| N-({(2R,4S,5R)-5-[3-(4-Fluorophenyl)-1-methyl-1H-pyrazol-5-yl]-1-azabicyclo[2.2.2]oct-2-yl}methyl)-4-methoxybenzamide                                                    | 46.00<br>946      | 494.2<br>3692 | 493<br>.22 | 8.2<br>49  |
| (3β,5ξ,6α,9ξ,12β)-20-(β-D-Glucopyranosyloxy)-3,12-dihydroxydammar-24-en-6-yl β-D-glucopyranoside                                                                         | 46.00<br>561      | 846.4<br>9781 | 845<br>.49 | 15.<br>031 |
| L-Phenylalanine                                                                                                                                                          | -                 | 165.0         | 164        | 5.2        |



|                                                                                                 |       |        |     |     |
|-------------------------------------------------------------------------------------------------|-------|--------|-----|-----|
|                                                                                                 | 0.000 | 7817   | .07 | 97  |
|                                                                                                 | 81    |        | 089 |     |
| tert-Butyl N-[1-(aminocarbonyl)-3-methylbutyl]carbamate                                         | 0.000 | 230.1  | 231 | 6.2 |
|                                                                                                 | 11    | 6315   | .17 | 32  |
|                                                                                                 |       |        | 049 |     |
| (1R,2R,6R,9R)-2,11,11-trimethyl-3-oxotricyclo[4.3.2.0 <sup>Å</sup> μ]undecane-9-carboxylic acid | -     | 232.1  | 233 | 11. |
|                                                                                                 | 18.01 | 4607   | .15 | 548 |
|                                                                                                 | 082   |        | 335 |     |
| 5-hydroxy-2-(4-hydroxyphenyl)-8,8-dimethyl-4H,8H-pyrano[3,2-g]chromen-4-one                     | -     | 336.0  | 369 | 16. |
|                                                                                                 | 0.000 | 9923   | .13 | 386 |
|                                                                                                 | 55    |        | 272 |     |
| Butyl 4-aminobenzoate                                                                           | -     | 193.11 | 194 | 13. |
|                                                                                                 | 0.000 | 019    | .11 | 61  |
|                                                                                                 | 09    |        | 748 |     |
| 2-Furoic acid                                                                                   | -     | 112.01 | 111 | 2.7 |
|                                                                                                 | 0.001 | 473    | .00 | 12  |
|                                                                                                 | 31    |        | 745 |     |
| DL-Metanephrine                                                                                 | 0.000 | 197.1  | 198 | 6.9 |
|                                                                                                 | 31    | 0551   | .11 | 75  |
|                                                                                                 |       |        | 279 |     |
| Prolylleucine                                                                                   | 0.000 | 228.1  | 229 | 4.9 |
|                                                                                                 | 16    | 4756   | .15 | 52  |
|                                                                                                 |       |        | 483 |     |
| (1R,2S,3R,4R)-3-[(Cyclopentylmethyl)amino]-4-phenyl-1,2-cyclopentanediol                        | -     | 275.1  | 276 | 17. |
|                                                                                                 | 0.000 | 8834   | .19 | 16  |
|                                                                                                 | 19    |        | 562 |     |
| 4-[3-(benzylamino)butyl]-2-methoxyphenol                                                        | -     | 285.1  | 286 | 17. |
|                                                                                                 | 0.000 | 7262   | .17 | 552 |
|                                                                                                 | 26    |        | 99  |     |
| 4-(2,6-dimethylphenyl)-5-(7-oxabicyclo[2.2.1]hept-2-yl)-2,4-dihydro-3H-1,2,4-triazole-3-thione  | 0.002 | 301.1  | 302 | 1.9 |
|                                                                                                 | 46    | 2734   | .13 | 42  |
|                                                                                                 |       |        | 461 |     |
| N-(2,4-Dimethylphenyl)formamide                                                                 | 0.000 | 149.0  | 150 | 4.8 |
|                                                                                                 | 06    | 8412   | .09 | 42  |
|                                                                                                 |       |        | 14  |     |
| Betaxolol                                                                                       | 18.01 | 325.2  | 308 | 13. |
|                                                                                                 | 038   | 2512   | .22 | 045 |
|                                                                                                 |       |        | 183 |     |
| N-(2,4-Dimethylphenyl)formamide                                                                 | -     | 117.05 | 150 | 11. |
|                                                                                                 | 32.02 | 77     | .09 | 904 |
|                                                                                                 | 636   |        | 113 |     |
| N-(1,3-benzodioxol-5-yl)-7-chloroquinolin-4-amine                                               | -     | 298.0  | 299 | 17. |
|                                                                                                 | 0.003 | 4723   | .05 | 062 |
|                                                                                                 | 68    |        | 45  |     |

|                                                                                                                                    |                   |               |            |            |
|------------------------------------------------------------------------------------------------------------------------------------|-------------------|---------------|------------|------------|
| N-[1-(4-methoxy-2-oxo-2H-pyran-6-yl)-2-methylbutyl]acetamide                                                                       | 21.98<br>461      | 275.11<br>601 | 276<br>.12 | 8.8<br>83  |
|                                                                                                                                    |                   |               | 329        |            |
| (3aR,5aR,9bR)-3a-hydroxy-5a,9-dimethyl-3-methylidene-2H,3H,3aH,4H,5H,5aH,6H,7H,8H,9bH-naphtho[1,2-b]furan-2-one                    | -<br>0.000<br>39  | 248.1<br>4086 | .13        | 16.<br>811 |
|                                                                                                                                    |                   |               | 757        |            |
| Nicotine                                                                                                                           | 0.000<br>18       | 162.11<br>587 | 163<br>.12 | 6.3<br>55  |
|                                                                                                                                    |                   |               | 312        |            |
| 2-Isopropyl-5-thieno[3,2-b]thiophen-2-yl-1,3,4-oxadiazole                                                                          | -<br>0.000<br>14  | 250.0<br>2332 | .03        | 1.0<br>69  |
|                                                                                                                                    |                   |               | 059        |            |
| Bis(2-ethylhexyl)adipate                                                                                                           | -<br>0.000<br>46  | 370.3<br>0785 | .31        | 23.<br>131 |
|                                                                                                                                    |                   |               | 506        |            |
| 4-[(1S,3aR,4S,6aR)-4-(4-hydroxy-3-methoxyphenyl)-hexahydrofuro[3,4-c]furan-1-yl]-2-methoxyphenol                                   | -<br>18.01<br>083 | 340.1<br>3081 | .13        | 12.<br>961 |
|                                                                                                                                    |                   |               | 806        |            |
| 3-(3,4-dihydroxyphenyl)propanoic acid                                                                                              | -<br>18.01<br>047 | 164.0<br>4744 | .08        | 2.8<br>64  |
|                                                                                                                                    |                   |               | 127        |            |
| Palmitic Acid                                                                                                                      | 17.02<br>617      | 273.2<br>6641 | 274<br>.27 | 14.<br>818 |
|                                                                                                                                    |                   |               | 368        |            |
| Argininosuccinic acid                                                                                                              | -<br>0.000<br>21  | 290.1<br>2242 | .12        | 1.5<br>16  |
|                                                                                                                                    |                   |               | 97         |            |
| (3beta,6alpha,9xi,12beta,20Z)-3,12-Dihydroxydammar-20(22),24-dien-6-yl 2-O-(6-deoxy-alpha-L-mannopyranosyl)-beta-D-glucopyranoside | 0.000<br>21       | 766.4<br>8694 | .48        | 17.<br>984 |
|                                                                                                                                    |                   |               | 535        |            |
| Tetramethylpyrazine                                                                                                                | 0.000<br>25       | 136.1<br>003  | 137<br>.10 | 5.6<br>13  |
|                                                                                                                                    |                   |               | 757        |            |
| Uridine                                                                                                                            | 0.000<br>13       | 244.0<br>6966 | 243<br>.06 | 3.5<br>19  |
|                                                                                                                                    |                   |               | 216        |            |
| N-Acetylhistamine                                                                                                                  | -<br>0.000<br>04  | 153.0<br>9018 | 154<br>.09 | 1.4<br>85  |
|                                                                                                                                    |                   |               | 744        |            |
| N-((2R,4S,5R)-5-[1-Methyl-3-(2-naphthyl)-1H-pyrazol-5-yl]-1-azabicyclo[2.2.2]oct-2-yl)methyl)-1,3-                                 | 35.96<br>872      | 530.2<br>0051 | .19        | 11.<br>11  |
|                                                                                                                                    |                   |               | 324        |            |

|                                         |       |        |     |     |
|-----------------------------------------|-------|--------|-----|-----|
| benzodioxole-5-carboxamide              |       |        |     |     |
| Resorcinol monoacetate                  | -     | 152.0  | 151 | 11. |
|                                         | 0.001 | 4613   | .03 | 95  |
|                                         | 22    |        | 885 |     |
| 2,5-bis(4-hydroxy-3-methoxyphenyl)-     | 21.98 | 382.1  | 383 | 18. |
| 3,4-dimethyloxolan-3-ol                 | 372   | 4101   | .14 | 148 |
|                                         |       |        | 828 |     |
| 1-(4-methoxyphenyl)-5-methyl-N-(2-      | 0.009 | 399.1  | 400 | 18. |
| phenoxyphenyl)-1H-pyrazole-4-           | 02    | 6731   | .17 | 352 |
| carboxamide                             |       |        | 459 |     |
| 3,5-Dihydroxy-2-(4-hydroxyphenyl)-4-    | 0.000 | 450.11 | 449 | 10. |
| oxo-3,4-dihydro-2H-chromen-7-yl         | 53    | 674    | .10 | 296 |
| hexopyranoside                          |       |        | 947 |     |
| Perillartine                            | 0.000 | 165.11 | 166 | 3.0 |
|                                         | 18    | 554    | .12 | 84  |
|                                         |       |        | 282 |     |
| (3beta,9xi)-3-(beta-D-                  | 626.2 | 1160.5 | 579 | 18. |
| Glucopyranosyloxy)-14-hydroxycarda-     | 921   | 7498   | .28 | 088 |
| 5,20(22)-dienolide                      |       |        | 021 |     |
| Dodecyl sulfate                         | -     | 266.1  | 265 | 19. |
|                                         | 0.003 | 5175   | .14 | 232 |
|                                         | 43    |        | 447 |     |
| Phenylglyoxylic acid                    | -     | 150.0  | 149 | 10. |
|                                         | 0.000 | 3081   | .02 | 17  |
|                                         | 89    |        | 353 |     |
| Cyclobenzaprine                         | -     | 234.1  | 276 | 5.9 |
|                                         | 41.03 | 3712   | .17 | 59  |
|                                         | 028   |        | 099 |     |
| 7-(3,4-dihydroxyphenyl)-5-hydroxy-1-(4- | 21.98 | 352.1  | 353 | 16. |
| hydroxyphenyl)heptan-3-one              | 376   | 3049   | .13 | 488 |
|                                         |       |        | 776 |     |
| $\alpha$ -Eleostearic acid              | -     | 278.2  | 279 | 22. |
|                                         | 0.000 | 2441   | .23 | 085 |
|                                         | 17    |        | 169 |     |
| ( $\pm$ )-Abscisic acid                 | -     | 264.1  | 265 | 13. |
|                                         | 0.000 | 3594   | .14 | 804 |
|                                         | 22    |        | 319 |     |
| Dodecyl sulfate                         | -     | 266.1  | 265 | 18. |
|                                         | 0.003 | 5162   | .14 | 871 |
|                                         | 56    |        | 435 |     |
| Isoflavones                             | -     | 322.1  | 355 | 16. |
|                                         | 0.000 | 2      | .15 | 226 |
|                                         | 51    |        | 335 |     |
| 5-[4-(3-hydroxy-4-methoxyphenyl)-       | -     | 340.1  | 341 | 13. |

|                                                                                                                                                                |        |        |     |     |
|----------------------------------------------------------------------------------------------------------------------------------------------------------------|--------|--------|-----|-----|
| hexahydrofuro[3,4-c]furan-1-yl]-2-methoxyphenol                                                                                                                | 18.011 | 3036   | .13 | 642 |
| 13(S)-HOTrE                                                                                                                                                    | 0.000  | 294.2  | 293 | 18. |
|                                                                                                                                                                | 18     | 1967   | .21 | 887 |
|                                                                                                                                                                |        |        | 24  |     |
| Propionylpromazine                                                                                                                                             | 0.006  | 340.1  | 341 | 20. |
|                                                                                                                                                                | 14     | 6707   | .17 | 1   |
|                                                                                                                                                                |        |        | 435 |     |
| (3beta,5xi,9xi,22beta)-22,24-Dihydroxyolean-12-en-3-yl 6-deoxy-alpha-L-mannopyranosyl-(1-2)-beta-D-galactopyranuronosyl-(1-2)-beta-D-glucopyranosiduronic acid | -      | 956.4  | 957 | 20. |
| 6-Deoxy- $\alpha$ -L-mannopyranosyl-(1->3)-[ $\beta$ -D-glucopyranosyl-(1->6)]-1-O-[3,27-dihydroxy-27,28-dioxolup-20(29)-en-28-yl]- $\beta$ -D-glucopyranose   | 0.001  | 956.4  | 955 | 19. |
|                                                                                                                                                                | 32     | 994    | .49 | 705 |
|                                                                                                                                                                |        |        | 213 |     |
| 6-Deoxyhexopyranosyl-(1-4)-[hexopyranosyl-(1-6)]-1-O-[27-hydroxy-3,27,28-trioxolup-20(29)-en-28-yl]hexopyranose                                                | 0.000  | 954.4  | 953 | 16. |
|                                                                                                                                                                | 42     | 8285   | .47 | 836 |
|                                                                                                                                                                |        |        | 571 |     |
| Acetophenone                                                                                                                                                   | 0.000  | 120.0  | 121 | 2.1 |
|                                                                                                                                                                | 24     | 5775   | .06 | 04  |
|                                                                                                                                                                |        |        | 512 |     |
| 2,3-dihydroxypropyl 12-methyltridecanoate                                                                                                                      | -      | 302.2  | 285 | 20. |
|                                                                                                                                                                | 0.000  | 4551   | .24 | 681 |
|                                                                                                                                                                | 2      |        | 228 |     |
| (1R,3S,4S,5R,7R)-4-(3-hydroxybutyl)-5-methyl-10-methylidene-8-oxatricyclo[5.3.0.0 <sup>A</sup> 1, <sup>B</sup> 2]decan-9-one                                   | 0.000  | 250.1  | 251 | 8.8 |
| Norfloxacin                                                                                                                                                    | 0.004  | 319.1  | 320 | 2.2 |
|                                                                                                                                                                | 77     | 3799   | .14 | 16  |
|                                                                                                                                                                |        |        | 526 |     |
| (2,5-dimethyl-3-furyl)[4-methyl-3-(2-thienyl)-1H-pyrazol-1-yl]methanone                                                                                        | 0.006  | 286.0  | 287 | 14. |
|                                                                                                                                                                | 4      | 84     | .09 | 251 |
|                                                                                                                                                                |        |        | 128 |     |
| 7-(3,4-dihydroxyphenyl)-5-hydroxy-1-(4-hydroxyphenyl)heptan-3-one                                                                                              | 21.98  | 352.1  | 353 | 16. |
|                                                                                                                                                                | 357    | 3029   | .13 | 927 |
|                                                                                                                                                                |        |        | 757 |     |
| Alanyltyrosine                                                                                                                                                 | 0.000  | 252.11 | 253 | 3.9 |
|                                                                                                                                                                | 14     | 115    | .11 | 81  |
|                                                                                                                                                                |        |        | 842 |     |
| 1-(4-nitrophenyl)piperidine                                                                                                                                    | 0.000  | 206.1  | 207 | 6.6 |
|                                                                                                                                                                | 28     | 0581   | .11 | 46  |

|                                                                                                                                                                                                                                                                                                                                                                                                                                                                               |       |        |     |     |
|-------------------------------------------------------------------------------------------------------------------------------------------------------------------------------------------------------------------------------------------------------------------------------------------------------------------------------------------------------------------------------------------------------------------------------------------------------------------------------|-------|--------|-----|-----|
|                                                                                                                                                                                                                                                                                                                                                                                                                                                                               |       |        | 31  |     |
| $\alpha$ -Lactose                                                                                                                                                                                                                                                                                                                                                                                                                                                             | -     | 342.11 | 360 | 1.6 |
|                                                                                                                                                                                                                                                                                                                                                                                                                                                                               | 0.000 | 583    | .14 | 62  |
|                                                                                                                                                                                                                                                                                                                                                                                                                                                                               |       | 38     | 963 |     |
| (3 $\beta$ ,5 $\xi$ ,9 $\xi$ )-3,23-Dihydroxy-1-oxoolean-12-en-28-oic acid                                                                                                                                                                                                                                                                                                                                                                                                    | 0.000 | 486.3  | 469 | 20. |
|                                                                                                                                                                                                                                                                                                                                                                                                                                                                               | 03    | 3456   | .33 | 036 |
|                                                                                                                                                                                                                                                                                                                                                                                                                                                                               |       |        | 105 |     |
| 4-Ethylphenol                                                                                                                                                                                                                                                                                                                                                                                                                                                                 | -     | 122.0  | 121 | 9.2 |
|                                                                                                                                                                                                                                                                                                                                                                                                                                                                               | 0.001 | 7184   | .06 | 92  |
|                                                                                                                                                                                                                                                                                                                                                                                                                                                                               |       | 33     | 456 |     |
| 2-Amino-1,3,4-octadecanetriol                                                                                                                                                                                                                                                                                                                                                                                                                                                 | -     | 317.2  | 318 | 14. |
|                                                                                                                                                                                                                                                                                                                                                                                                                                                                               | 0.000 | 925    | .29 | 875 |
|                                                                                                                                                                                                                                                                                                                                                                                                                                                                               |       | 5      | 977 |     |
| (2S,3S,4S,5R,6R)-6-<br>{[(2S,3R,4R,6aR,6bS,8aS,12aS,14bR)-4-<br>formyl-2-hydroxy-4,6a,6b,11,11,14b-<br>hexamethyl-8a-({[(2S,3R,4S,5S,6R)-<br>3,4,5-trihydroxy-6-(hydroxymethyl)oxan-<br>2-yl]oxy}carbonyl)-<br>1,2,3,4,4a,5,6,6a,6b,7,8,8a,9,10,11,12,12a,<br>14,14a,14b-icosahydropicen-3-yl]oxy}-<br>3,4,5-trihydroxyoxane-2-carboxylic acid<br>6-Deoxyhexopyranosyl-(1-4)-<br>[hexopyranosyl-(1-6)]-1-O-[27-hydroxy-<br>3,27,28-trioxolup-20(29)-en-28-<br>yl]hexopyranose | -     | 824.4  | 825 | 18. |
|                                                                                                                                                                                                                                                                                                                                                                                                                                                                               | 0.000 | 1846   | .42 | 159 |
|                                                                                                                                                                                                                                                                                                                                                                                                                                                                               |       | 98     | 554 |     |
|                                                                                                                                                                                                                                                                                                                                                                                                                                                                               | 0.000 | 954.4  | 953 | 16. |
|                                                                                                                                                                                                                                                                                                                                                                                                                                                                               | 43    | 8286   | .47 | 999 |
|                                                                                                                                                                                                                                                                                                                                                                                                                                                                               |       |        | 559 |     |
| 4-Hydroxycoumarin                                                                                                                                                                                                                                                                                                                                                                                                                                                             | -     | 162.0  | 161 | 11. |
|                                                                                                                                                                                                                                                                                                                                                                                                                                                                               | 0.000 | 3083   | .02 | 321 |
|                                                                                                                                                                                                                                                                                                                                                                                                                                                                               |       | 86     | 351 |     |
| 4,5-Dicaffeoylquinic acid                                                                                                                                                                                                                                                                                                                                                                                                                                                     | 0.000 | 516.1  | 515 | 10. |
|                                                                                                                                                                                                                                                                                                                                                                                                                                                                               | 32    | 271    | .11 | 509 |
|                                                                                                                                                                                                                                                                                                                                                                                                                                                                               |       |        | 987 |     |
| 1,9b-Dihydroxy-6,6,9a-trimethyl-<br>5,5a,6,7,8,9,9a,9b-octahydronaphtho[1,2-<br>c]furan-3(1H)-one                                                                                                                                                                                                                                                                                                                                                                             | 21.98 | 288.1  | 289 | 4.3 |
|                                                                                                                                                                                                                                                                                                                                                                                                                                                                               | 031   | 3212   | .13 | 17  |
|                                                                                                                                                                                                                                                                                                                                                                                                                                                                               |       |        | 937 |     |
| Nicotine                                                                                                                                                                                                                                                                                                                                                                                                                                                                      | 0.000 | 162.11 | 163 | 5.2 |
|                                                                                                                                                                                                                                                                                                                                                                                                                                                                               | 16    | 586    | .12 | 75  |
|                                                                                                                                                                                                                                                                                                                                                                                                                                                                               |       |        | 314 |     |
| Didemethylisoproturon                                                                                                                                                                                                                                                                                                                                                                                                                                                         | 0.000 | 178.11 | 161 | 7.0 |
|                                                                                                                                                                                                                                                                                                                                                                                                                                                                               | 22    | 084    | .10 | 82  |
|                                                                                                                                                                                                                                                                                                                                                                                                                                                                               |       |        | 754 |     |
| 6-Deoxyhexopyranosyl-(1-4)-<br>[hexopyranosyl-(1-6)]-1-O-[27-hydroxy-<br>3,27,28-trioxolup-20(29)-en-28-                                                                                                                                                                                                                                                                                                                                                                      | 0.000 | 954.4  | 953 | 22. |
|                                                                                                                                                                                                                                                                                                                                                                                                                                                                               | 79    | 8322   | .47 | 059 |
|                                                                                                                                                                                                                                                                                                                                                                                                                                                                               |       |        | 595 |     |

|                                                                                                                                                                             |       |        |     |     |
|-----------------------------------------------------------------------------------------------------------------------------------------------------------------------------|-------|--------|-----|-----|
| yl]hexopyranose                                                                                                                                                             |       |        |     |     |
| Diisodecyl phthalate                                                                                                                                                        | 21.98 | 468.3  | 469 | 20. |
|                                                                                                                                                                             | 429   | 2389   | .33 | 824 |
|                                                                                                                                                                             |       |        | 115 |     |
| D-(+)-Malic acid                                                                                                                                                            | -     | 134.0  | 133 | 1.6 |
|                                                                                                                                                                             | 0.001 | 2026   | .01 | 42  |
|                                                                                                                                                                             | 26    |        | 299 |     |
| 3-(2-Hydroxyethyl)indole                                                                                                                                                    | -     | 161.0  | 162 | 13. |
|                                                                                                                                                                             | 0.000 | 84     | .09 | 268 |
|                                                                                                                                                                             | 07    |        | 126 |     |
| (±)8-HEPE                                                                                                                                                                   | -     | 300.2  | 301 | 19. |
|                                                                                                                                                                             | 18.01 | 0873   | .21 | 148 |
|                                                                                                                                                                             | 077   |        | 6   |     |
| 4-tert-Butylphenyl salicylate                                                                                                                                               | -     | 238.0  | 271 | 14. |
|                                                                                                                                                                             | 32.02 | 9909   | .13 | 878 |
|                                                                                                                                                                             | 651   |        | 26  |     |
| Diisodecyl phthalate                                                                                                                                                        | 39.99 | 486.3  | 469 | 16. |
|                                                                                                                                                                             | 45    | 3411   | .33 | 066 |
|                                                                                                                                                                             |       |        | 081 |     |
| 1-{2-hydroxy-3-[4-(1,2,3-thiadiazol-4-yl)phenoxy]propyl}-4-piperidinecarboxamide                                                                                            | 21.97 | 384.1  | 385 | 15. |
|                                                                                                                                                                             | 89    | 2016   | .12 | 104 |
|                                                                                                                                                                             |       |        | 744 |     |
| Imazethapyr                                                                                                                                                                 | 0.000 | 289.1  | 290 | 7.0 |
|                                                                                                                                                                             | 17    | 4281   | .15 | 63  |
|                                                                                                                                                                             |       |        | 009 |     |
| 5,7-dihydroxy-2-(4-hydroxyphenyl)-6-[(2S,3R,4R,5S,6R)-3,4,5-trihydroxy-6-(hydroxymethyl)oxan-2-yl]-8-[(2S,3R,4R,5R,6S)-3,4,5-trihydroxy-6-methyloxan-2-yl]-4H-chromen-4-one | -     | 546.1  | 579 | 12. |
|                                                                                                                                                                             | 32.02 | 3712   | .17 | 551 |
|                                                                                                                                                                             | 644   |        | 059 |     |
| Sebuthylazine                                                                                                                                                               | -     | 229.1  | 212 | 4.1 |
|                                                                                                                                                                             | 0.003 | 0625   | .10 | 65  |
|                                                                                                                                                                             | 17    |        | 298 |     |
| Estrone sulfate                                                                                                                                                             | -     | 350.11 | 349 | 17. |
|                                                                                                                                                                             | 0.003 | 549    | .10 | 67  |
|                                                                                                                                                                             | 3     |        | 822 |     |
| 6a,7,8,12a-tetrahydroxy-3-methyl-1,2,3,4,5,6,6a,7,12,12a-decahydrotetraphene-1,12-dione                                                                                     | 21.98 | 366.1  | 367 | 18. |
|                                                                                                                                                                             | 394   | 0993   | .11 | 556 |
|                                                                                                                                                                             |       |        | 722 |     |
| Rifampicin                                                                                                                                                                  | -     | 822.4  | 821 | 18. |
|                                                                                                                                                                             | 0.001 | 0331   | .39 | 495 |
|                                                                                                                                                                             | 81    |        | 655 |     |
| Nadolol                                                                                                                                                                     | -     | 309.1  | 310 | 9.1 |
|                                                                                                                                                                             | 0.000 | 9399   | .20 | 85  |

|                                                                                                                                              |        |        |     |     |
|----------------------------------------------------------------------------------------------------------------------------------------------|--------|--------|-----|-----|
|                                                                                                                                              | 02     |        | 126 |     |
| 5,7,3',4'-Tetrahydroxy-6,8-diprenylisoflavone                                                                                                | -      | 422.1  | 423 | 19. |
|                                                                                                                                              | 0.000  | 7226   | .17 | 107 |
|                                                                                                                                              | 68     |        | 953 |     |
| Xanthosine                                                                                                                                   | 0.000  | 284.0  | 283 | 6.2 |
|                                                                                                                                              | 41     | 761    | .06 | 75  |
|                                                                                                                                              |        |        | 888 |     |
| 7-(2-aminophenyl)heptanoic acid                                                                                                              | 21.98  | 243.1  | 244 | 5.4 |
|                                                                                                                                              | 054    | 2212   | .12 | 32  |
|                                                                                                                                              |        |        | 939 |     |
| (1R,2R,5S,8R,10R,14R)-20-hydroxy-1,2,14,18,18-pentamethyl-17-oxo-8-(prop-1-en-2-yl)pentacyclo[11.8.0.0.0.0.0]heptacosane-5-carboxylic acid   | -      | 452.3  | 453 | 18. |
|                                                                                                                                              | 18.011 | 2857   | .33 | 033 |
|                                                                                                                                              | 04     |        | 585 |     |
| Ursolic acid                                                                                                                                 | -      | 456.3  | 439 | 13. |
|                                                                                                                                              | 0.000  | 5997   | .35 | 936 |
|                                                                                                                                              | 37     |        | 669 |     |
| N1-(4-isopropylphenyl)-4-(2,5-dioxotetrahydro-1H-pyrrol-1-yl)benzene-1-sulfonamide                                                           | 0.006  | 372.1  | 371 | 15. |
|                                                                                                                                              | 76     | 2114   | .11 | 637 |
|                                                                                                                                              |        |        | 386 |     |
| (3β,5ξ,9ξ,18ξ)-28-Hydroxy-28-oxoolean-12-en-3-yl 6-deoxy-α-L-mannopyranosyl-(1->3)-[β-D-glucopyranosyl-(1->2)]-β-D-glucopyranosiduronic acid | 0.002  | 940.5  | 939 | 19. |
|                                                                                                                                              | 12     | 0528   | .49 | 442 |
|                                                                                                                                              |        |        | 756 |     |
| D-(+)-Maltose                                                                                                                                | -      | 342.11 | 377 | 1.4 |
|                                                                                                                                              | 0.000  | 599    | .08 | 36  |
|                                                                                                                                              | 22     |        | 554 |     |
| 5-hydroxy-4-methoxy-5,6-dihydro-2H-pyran-2-one                                                                                               | 0.000  | 144.0  | 145 | 4.7 |
|                                                                                                                                              | 01     | 4227   | .04 | 84  |
|                                                                                                                                              |        |        | 955 |     |
| 6-hydroxy-4a-(hydroxymethyl)-5-methyl-3-(prop-1-en-2-yl)-2,3,4,4a,5,6,7,8-octahydronaphthalen-2-one                                          | -      | 250.1  | 251 | 11. |
|                                                                                                                                              | 0.000  | 5657   | .16 | 551 |
|                                                                                                                                              | 32     |        | 385 |     |
| Ageratriol                                                                                                                                   | -      | 234.1  | 235 | 16. |
|                                                                                                                                              | 18.01  | 617    | .16 | 432 |
|                                                                                                                                              | 085    |        | 898 |     |
| (1R,2R,5S,8R,10R,14R)-20-hydroxy-1,2,14,18,18-pentamethyl-17-oxo-8-(prop-1-en-2-yl)pentacyclo[11.8.0.0.0.0.0]heptacosane-5-carboxylic acid   | -      | 452.3  | 453 | 20. |
|                                                                                                                                              | 18.01  | 2863   | .33 | 058 |
|                                                                                                                                              | 098    |        | 591 |     |

|                                                                                                 |                   |               |            |            |
|-------------------------------------------------------------------------------------------------|-------------------|---------------|------------|------------|
| 6a,7,8,12a-tetrahydroxy-3-methyl-<br>1,2,3,4,5,6,6a,7,12,12a-<br>decahydrotetraphene-1,12-dione | 21.98<br>289      | 366.1<br>0887 | 367<br>.11 | 19.<br>565 |
| N-Acetyl-DL-norvaline                                                                           | -<br>0.000<br>95  | 159.0<br>8859 | 158<br>.08 | 8.0<br>17  |
| AB-CHMICA                                                                                       | 21.97<br>97       | 377.2<br>0568 | 378<br>.21 | 12.<br>215 |
| 8,8'-dicarboxy-1,1'-binaphthalene                                                               | 0.002<br>85       | 342.0<br>9205 | 341<br>.08 | 8.8<br>76  |
| BMK methyl glycidate                                                                            | -<br>32.02<br>613 | 160.0<br>5252 | 193<br>.08 | 11.<br>138 |
| 2,4,6-Trihydroxy-2-(4-hydroxybenzyl)-1-<br>benzofuran-3(2H)-one                                 | -<br>0.000<br>15  | 288.0<br>6323 | 287<br>.05 | 13.<br>561 |
| Sebuthylazine                                                                                   | -<br>0.003<br>1   | 229.1<br>0633 | 230<br>.11 | 4.7<br>1   |
| Estriol 17-sulfate                                                                              | -<br>46.00<br>904 | 322.1<br>2032 | 323<br>.12 | 17.<br>619 |
| 6-Pentyl-2H-pyran-2-one                                                                         | 0.000<br>05       | 166.0<br>9943 | 167<br>.10 | 10.<br>986 |
| N1-(2-{2-[2-<br>(acetylamino)phenoxy]ethoxy}phenyl)ac<br>etamide                                | 0.000<br>04       | 328.1<br>4235 | 329<br>.14 | 8.9<br>23  |
| 4-Methoxybenzaldehyde                                                                           | -<br>0.000<br>11  | 136.0<br>5232 | 137<br>.05 | 15.<br>822 |
| 3-Hydroxy-2-methylpyridine                                                                      | 0.000<br>45       | 109.0<br>5322 | 110<br>.06 | 10.<br>367 |
| Rifampicin                                                                                      | -<br>0.001<br>44  | 822.4<br>0368 | 821<br>.39 | 21.<br>902 |
| Palmitoleic Acid                                                                                | 21.98<br>416      | 276.2<br>0874 | 277<br>.21 | 16.<br>554 |
| 3-(2-Hydroxyethyl)indole                                                                        | -<br>0.000        | 161.0<br>8395 | 162<br>.09 | 10.<br>941 |



|                                                                                                                        |       |        |     |     |
|------------------------------------------------------------------------------------------------------------------------|-------|--------|-----|-----|
|                                                                                                                        | 11    |        | 123 |     |
| DL-Arginine                                                                                                            | -     | 174.11 | 173 | 1.2 |
|                                                                                                                        | 0.000 | 072    | .10 | 13  |
|                                                                                                                        | 96    |        | 344 |     |
| Acetyl norfentanyl                                                                                                     | 0.000 | 218.1  | 236 | 7.8 |
|                                                                                                                        | 07    | 4198   | .17 | 22  |
|                                                                                                                        |       |        | 577 |     |
| Betulin                                                                                                                | -     | 442.3  | 443 | 21. |
|                                                                                                                        | 0.000 | 8069   | .38 | 044 |
|                                                                                                                        | 39    |        | 797 |     |
| N-((2R,4S,5R)-5-[3-(4-Fluorophenyl)-1-methyl-1H-pyrazol-5-yl]-1-azabicyclo[2.2.2]oct-2-yl)methyl-4-methoxybenzamide    | 46.00 | 494.2  | 493 | 14. |
|                                                                                                                        | 91    | 3656   | .22 | 921 |
|                                                                                                                        |       |        | 931 |     |
| Nadolol                                                                                                                | 0.000 | 309.1  | 310 | 10. |
|                                                                                                                        | 06    | 9407   | .20 | 844 |
|                                                                                                                        |       |        | 132 |     |
| (3beta,5xi,6alpha,9xi,12beta)-20-(beta-D-Glucopyranosyloxy)-3,12-dihydroxydammar-24-en-6-yl beta-D-glucopyranoside     | 0.000 | 800.4  | 845 | 16. |
|                                                                                                                        | 1     | 9231   | .49 | 401 |
|                                                                                                                        |       |        | 066 |     |
| (3aR,4S,6S,7R,7aR)-6-ethenyl-4-hydroxy-7-(3-hydroxyprop-1-en-2-yl)-6-methyl-3-methylidene-octahydro-1-benzofuran-2-one | -     | 246.1  | 247 | 13. |
|                                                                                                                        | 18.01 | 2522   | .13 | 508 |
|                                                                                                                        | 094   |        | 249 |     |
| $\alpha$ -Cyclodextrin                                                                                                 | 0.001 | 972.3  | 101 | 5.4 |
|                                                                                                                        | 46    | 184    | 7.3 | 66  |
|                                                                                                                        |       |        | 168 |     |
|                                                                                                                        |       |        | 9   |     |
| 1-Ethyl-6,7-dimethoxyisoquinolin-3-ol                                                                                  | -     | 233.1  | 234 | 4.8 |
|                                                                                                                        | 0.000 | 0518   | .11 | 35  |
|                                                                                                                        | 01    |        | 246 |     |
| 1,3-Dimethyl-6-morpholino-1,2,3,4-tetrahydropyrimidine-2,4-dione                                                       | 0.000 | 225.11 | 226 | 6.4 |
|                                                                                                                        | 17    | 151    | .11 | 8   |
|                                                                                                                        |       |        | 879 |     |
| 3-(propan-2-yl)-octahydropyrrolo[1,2-a]pyrazine-1,4-dione                                                              | 0.000 | 196.1  | 197 | 5.6 |
|                                                                                                                        | 33    | 2151   | .12 | 53  |
|                                                                                                                        |       |        | 878 |     |
| 7-(tert-butyl)-4-imino-1,2,3,4,5,6-hexahydropyrido[3,4-d]pyridazine-1,5-dione                                          | -     | 234.11 | 235 | 1.9 |
|                                                                                                                        | 0.000 | 166    | .11 | 52  |
|                                                                                                                        | 02    |        | 893 |     |
| 1,3-Dimethyl-6-morpholino-1,2,3,4-tetrahydropyrimidine-2,4-dione                                                       | 0.000 | 225.11 | 226 | 6.1 |
|                                                                                                                        | 11    | 145    | .11 | 93  |
|                                                                                                                        |       |        | 874 |     |

|                                                                                                                                                |       |       |     |     |
|------------------------------------------------------------------------------------------------------------------------------------------------|-------|-------|-----|-----|
| 1-{4-[(3S)-3-(5-Methyl-1,3-benzoxazol-2-yl)-1-pyrrolidinyl]-1-piperidinyl} ethanone                                                            | -     | 166.0 | 350 | 8.3 |
| (3beta,5xi,9xi)-28-Hydroxy-28-oxoolean-12-en-3-yl beta-D-galactopyranosyl-(1-3)-[beta-D-glucopyranosyl-(1-2)]-beta-D-glucopyranosiduronic acid | 161.1 | 7425  | .18 | 97  |
| 3-(tert-Butyl)-N-[4-(2,3-dihydroimidazo[2,1-b][1,3]thiazol-6-yl)phenyl]-1-methyl-1H-pyrazole-5-carboxamide                                     | 2043  |       | 228 |     |
| Palmitoleic Acid                                                                                                                               | 956.4 | 1912. | 955 | 20. |
| (2E)-3-(3,4-dihydroxy-2-methoxyphenyl)-1-(4-hydroxyphenyl)prop-2-en-1-one                                                                      | 9914  | 99722 | .49 | 045 |
| 4-tert-Butylphenyl salicylate                                                                                                                  | 0.001 | 381.1 | 380 | 7.6 |
| D-(+)-Glucose                                                                                                                                  | 08    | 6341  | .15 | 21  |
| 6-Methylquinoline                                                                                                                              | 21.98 | 276.2 | 277 | 18. |
| N-({(2R,4S,5R)-5-[3-(4-Fluorophenyl)-1-methyl-1H-pyrazol-5-yl]-1-azabicyclo[2.2.2]oct-2-yl}methyl)-4-methoxybenzamide                          | 424   | 0882  | .21 | 001 |
| VLK                                                                                                                                            |       |       | 609 |     |
| Betulin                                                                                                                                        | -     | 286.0 | 287 | 16. |
| Betulin                                                                                                                                        | 0.000 | 8387  | .09 | 025 |
| Ergocalciferol                                                                                                                                 | 26    |       | 103 |     |
| Neostigmine                                                                                                                                    | -     | 238.0 | 271 | 15. |
|                                                                                                                                                | 32.02 | 9905  | .13 | 144 |
|                                                                                                                                                | 654   |       | 251 |     |
|                                                                                                                                                | 17.02 | 197.0 | 198 | 1.3 |
|                                                                                                                                                | 655   | 8994  | .09 | 36  |
|                                                                                                                                                |       |       | 721 |     |
|                                                                                                                                                | 0.000 | 143.0 | 144 | 8.5 |
|                                                                                                                                                | 11    | 7361  | .08 | 88  |
|                                                                                                                                                |       |       | 089 |     |
|                                                                                                                                                | 46.00 | 494.2 | 493 | 15. |
|                                                                                                                                                | 925   | 3671  | .22 | 183 |
|                                                                                                                                                |       |       | 943 |     |
|                                                                                                                                                | 0.000 | 358.2 | 180 | 6.7 |
|                                                                                                                                                | 33    | 5833  | .13 | 38  |
|                                                                                                                                                |       |       | 651 |     |
|                                                                                                                                                | -     | 442.3 | 425 | 17. |
|                                                                                                                                                | 0.000 | 8062  | .37 | 783 |
|                                                                                                                                                | 46    |       | 729 |     |
|                                                                                                                                                | -     | 442.3 | 443 | 18. |
|                                                                                                                                                | 0.000 | 8076  | .38 | 086 |
|                                                                                                                                                | 32    |       | 803 |     |
|                                                                                                                                                | -     | 396.3 | 379 | 27. |
|                                                                                                                                                | 0.000 | 3897  | .33 | 38  |
|                                                                                                                                                | 24    |       | 566 |     |
|                                                                                                                                                | 0.000 | 222.1 | 223 | 9.6 |
|                                                                                                                                                | 09    | 3692  | .14 | 67  |

|                                                                                                                                        |        |        |     |     |
|----------------------------------------------------------------------------------------------------------------------------------------|--------|--------|-----|-----|
|                                                                                                                                        |        |        | 42  |     |
| 4-styrylpyridine                                                                                                                       | -      | 181.0  | 182 | 5.3 |
|                                                                                                                                        | 0.003  | 8531   | .09 | 72  |
|                                                                                                                                        | 84     |        | 259 |     |
| 5,7,3',4'-Tetrahydroxy-6,8-diprenylisoflavone                                                                                          | -      | 422.1  | 423 | 19. |
|                                                                                                                                        | 0.000  | 7255   | .17 | 566 |
|                                                                                                                                        | 39     |        | 972 |     |
| 10-HDA                                                                                                                                 | -      | 168.11 | 169 | 10. |
|                                                                                                                                        | 18.01  | 498    | .12 | 938 |
|                                                                                                                                        | 062    |        | 225 |     |
| 4-Hydroxy-2-methylbenzoic acid                                                                                                         | -      | 152.0  | 153 | 15. |
|                                                                                                                                        | 0.000  | 473    | .05 | 329 |
|                                                                                                                                        | 04     |        | 455 |     |
| N-(2-Acetamidoethyl)-2-[(3R,4S)-3-[(5-butyl-1,2-oxazol-3-yl)methyl]-4-piperidinyl]acetamide                                            | 21.98  | 386.2  | 387 | 13. |
|                                                                                                                                        | 342    | 3086   | .23 | 496 |
|                                                                                                                                        |        |        | 81  |     |
| Avocadyne 1-acetate                                                                                                                    | -      | 308.2  | 309 | 19. |
|                                                                                                                                        | 18.01  | 3497   | .24 | 405 |
|                                                                                                                                        | 074    |        | 225 |     |
| N-(1-benzyl-4-piperidinyl)-1-[2-(2-pyridinyl)ethyl]-1H-pyrrole-2-carboxamide                                                           | 0.005  | 388.2  | 389 | 10. |
|                                                                                                                                        | 66     | 3197   | .23 | 117 |
|                                                                                                                                        |        |        | 92  |     |
| N-[1-Amino-3-(4-methoxyphenyl)-1-oxopropan-2-yl]-1,3,4-trihydroxy-5-[[3-methyl-2-(methylamino)butanoyl]amino]cyclohexane-1-carboxamide | -      | 480.2  | 479 | 9.8 |
|                                                                                                                                        | 0.0011 | 5725   | .24 | 08  |
|                                                                                                                                        | 5      |        | 997 |     |
| Bisphenol A                                                                                                                            | -      | 228.11 | 227 | 7.9 |
|                                                                                                                                        | 0.004  | 065    | .10 | 8   |
|                                                                                                                                        | 38     |        | 336 |     |
| (3aR,4R,11aR)-4-hydroxy-10-(hydroxymethyl)-3-methylidene-2-oxo-2H,3H,3aH,4H,5H,8H,9H,11aH-cyclodeca[b]furan-6-carbaldehyde             | 21.98  | 300.0  | 301 | 16. |
|                                                                                                                                        | 39     | 9932   | .10 | 123 |
|                                                                                                                                        |        |        | 66  |     |
| MBZP                                                                                                                                   | 0.000  | 190.1  | 191 | 8.3 |
|                                                                                                                                        | 11     | 4711   | .15 | 1   |
|                                                                                                                                        |        |        | 439 |     |
| Syringic acid                                                                                                                          | -      | 198.0  | 197 | 10. |
|                                                                                                                                        | 0.000  | 5233   | .04 | 776 |
|                                                                                                                                        | 49     |        | 501 |     |
| 3-Butene-1,2,3-tricarboxylic acid                                                                                                      | -      | 188.0  | 187 | 5.9 |
|                                                                                                                                        | 0.000  | 3154   | .02 | 39  |
|                                                                                                                                        | 55     |        | 426 |     |
| N1-bicyclo[2.2.2]oct-2-ylbenzamide                                                                                                     | -      | 229.1  | 230 | 17. |

|                                                                                                                                       |       |        |     |     |
|---------------------------------------------------------------------------------------------------------------------------------------|-------|--------|-----|-----|
|                                                                                                                                       | 0.000 | 4659   | .15 | 849 |
|                                                                                                                                       | 07    |        | 387 |     |
| Phloretin                                                                                                                             | 0.000 | 274.0  | 273 | 12. |
|                                                                                                                                       | 09    | 8421   | .07 | 969 |
|                                                                                                                                       |       |        | 724 |     |
| 1-(2-chlorobenzyl)-2,4-dioxo-1,2,3,4-tetrahydropyrimidine-5-carbonitrile                                                              | 0.000 | 261.0  | 260 | 5.0 |
|                                                                                                                                       | 36    | 3087   | .02 | 59  |
|                                                                                                                                       |       |        | 359 |     |
| 4-Methoxybenzaldehyde                                                                                                                 | -     | 136.0  | 273 | 15. |
|                                                                                                                                       | 0.000 | 5233   | .11 | 53  |
|                                                                                                                                       | 1     |        | 191 |     |
| N'-(4-Cyano-3-methylpyrido[1,2-a]benzimidazol-1-yl)-N,N-dimethyliminoformamide                                                        | -     | 277.1  | 278 | 7.5 |
|                                                                                                                                       | 0.001 | 3145   | .13 | 12  |
|                                                                                                                                       | 3     |        | 864 |     |
| AB-CHMICA                                                                                                                             | 21.98 | 377.2  | 378 | 10. |
|                                                                                                                                       |       | 0598   | .21 | 571 |
|                                                                                                                                       |       |        | 326 |     |
| Pantothenic acid                                                                                                                      | -     | 219.11 | 220 | 6.9 |
|                                                                                                                                       | 0.000 | 066    | .11 | 51  |
|                                                                                                                                       | 01    |        | 813 |     |
| 1,5-Naphthalenediamine                                                                                                                | -     | 117.05 | 159 | 7.2 |
|                                                                                                                                       | 41.02 | 795    | .09 | 96  |
|                                                                                                                                       | 645   |        | 169 |     |
| di(3-pyridyl) 5-(tert-butyl)isophthalate                                                                                              | -     | 376.1  | 377 | 10. |
|                                                                                                                                       | 0.004 | 38     | .14 | 948 |
|                                                                                                                                       | 3     |        | 508 |     |
| Caffeic acid                                                                                                                          | -     | 134.0  | 179 | 10. |
|                                                                                                                                       | 46.00 | 362    | .03 | 224 |
|                                                                                                                                       | 606   |        | 442 |     |
| 6-Hydroxy-1-(hydroxymethyl)-5-{2-[2-(hydroxymethyl)-1-pyrrolidinyl]-2-oxoethyl}-1,4a-dimethyldecahydro-2-naphthalenyl phenylcarbamate | -     | 486.3  | 523 | 10. |
|                                                                                                                                       | 1.984 | 0406   | .25 | 705 |
|                                                                                                                                       | 57    |        | 262 |     |
| 5-hydroxy-2-(4-hydroxyphenyl)-7-[(3,4,5-trihydroxy-6-methyloxan-2-yl)oxy]-3-[(3,4,5-trihydroxyoxan-2-yl)oxy]-4H-chromen-4-one         | -     | 564.1  | 563 | 12. |
|                                                                                                                                       | 0.000 | 4766   | .14 | 063 |
|                                                                                                                                       | 25    |        | 038 |     |
| 3-methoxy-1,13-dimethyl-9,11,12,13,14,15,16,17-octahydro-8H-cyclopenta[a]phenanthren-17-ol                                            | -     | 239.1  | 281 | 6.0 |
|                                                                                                                                       | 59.04 | 5245   | .18 | 62  |
|                                                                                                                                       | 083   |        | 628 |     |
| Pelargonidin                                                                                                                          | -     | 270.0  | 271 | 15. |
|                                                                                                                                       | 0.000 | 5262   | .05 | 026 |
|                                                                                                                                       | 2     |        | 975 |     |
| (2R,3R)-3,5-dihydroxy-2-(4-                                                                                                           | -     | 302.0  | 303 | 12. |

|                                                                                                                                                                                           |                    |                        |                   |            |
|-------------------------------------------------------------------------------------------------------------------------------------------------------------------------------------------|--------------------|------------------------|-------------------|------------|
| hydroxyphenyl)-7-methoxy-3,4-dihydro-<br>2H-1-benzopyran-4-one<br>Prostaglandin E1                                                                                                        | 0.000<br>13<br>-   | 7891<br>314.2          | .08<br>597<br>315 | 272<br>21. |
|                                                                                                                                                                                           | 39.99<br>53        | 4533                   | .25<br>269        | 074        |
| 2-(4-Methyl-3-cyclohexen-1-yl)-2-<br>propanyl 6-O-(6-deoxy- $\alpha$ -L-<br>mannopyranosyl)- $\beta$ -D-glucopyranoside                                                                   | 0.000<br>25        | 462.2<br>4675          | 461<br>.23        | 12.<br>148 |
|                                                                                                                                                                                           |                    |                        | 947               |            |
| 5-hydroxy-2-(4-hydroxyphenyl)-7-<br>[(3,4,5-trihydroxy-6-methyloxan-2-<br>yl)oxy]-3-[(3,4,5-trihydroxyoxan-2-<br>yl)oxy]-4H-chromen-4-one<br>Cynaropicrin                                 | -<br>0.000<br>06   | 564.1<br>4784          | 563<br>.14        | 12.<br>233 |
|                                                                                                                                                                                           | 21.98<br>401       | 368.1<br>2565          | 369<br>.13        | 15.<br>487 |
|                                                                                                                                                                                           |                    |                        | 287               |            |
| 4-Dimethylaminoantipyrine                                                                                                                                                                 | 0.000<br>09        | 231.1<br>3725          | 232<br>.14        | 9.2<br>24  |
|                                                                                                                                                                                           |                    |                        | 453               |            |
| 4-{5-[(4-methylphenyl)methylene]-4-<br>oxo-2-thioxo-1,3-thiazolan-3-yl}-N-(1,3-<br>thiazol-2-yl)benzenesulfonamide                                                                        | -<br>136.8<br>3545 | 336.1<br>6417          | 337<br>.17        | 1.2<br>62  |
| 11-methyl-2,7-dimethylidene-6,12-dioxo-<br>5,14-<br>dioxatricyclo[9.2.1.0 $\hat{\square}$ , $\hat{\square}$ ,]<br>tetradec-<br>1(13)-en-9-yl 2-methylprop-2-enoate                        | -<br>10.04<br>239  | 334.0<br>836           | 367<br>.11        | 19.<br>211 |
|                                                                                                                                                                                           |                    |                        | 71                |            |
| 12-benzyl-5,8,21-trimethyl-3-(2-<br>methylpropyl)-6,9-bis(propan-2-yl)-<br>icosahydropyrrolo[1,2-q]1-oxa-<br>4,7,10,13,17-pentaazacyclononadecane-<br>1,4,7,10,13,17-hexone<br>Kanosamine | 37.95<br>359<br>-  | 707.3<br>6374<br>161.0 | 708<br>.37        | 13.<br>199 |
|                                                                                                                                                                                           | 18.01<br>052       | 6885                   | .07<br>613        | 93         |
| 7-hydroxy-2-(4-hydroxyphenyl)-5-<br>methoxy-3,4-dihydro-2H-1-benzopyran-<br>4-one<br>Phenylacetaldehyde                                                                                   | 0.000<br>06<br>-   | 286.0<br>8419<br>120.0 | 287<br>.09        | 13.<br>268 |
|                                                                                                                                                                                           | 0.001<br>3         | 5621                   | .04<br>893        | 48         |
| Phenylbutazone                                                                                                                                                                            | -<br>0.005<br>09   | 308.1<br>4738          | 307<br>.14        | 11.<br>727 |
|                                                                                                                                                                                           |                    |                        | 011               |            |
| (2R)-2-[(2R,5S)-5-[(2S)-2-<br>hydroxybutyl]oxolan-2-yl]propanoic acid                                                                                                                     | -<br>0.000         | 216.1<br>3577          | 217<br>.14        | 13.<br>422 |

|                                                                                              |       |       |     |     |
|----------------------------------------------------------------------------------------------|-------|-------|-----|-----|
|                                                                                              | 38    |       | 305 |     |
| 3-amino-4-{2-[4-(tert-butyl)phenyl]diaz-<br>1-enyl}-4,5-dihydro-1H-pyrazol-5-one             | -     | 259.1 | 260 | 12. |
|                                                                                              | 0.000 | 4253  | .15 | 913 |
|                                                                                              | 78    |       | 045 |     |
| 3-amino-4-{2-[4-(tert-butyl)phenyl]diaz-<br>1-enyl}-4,5-dihydro-1H-pyrazol-5-one             | 18.01 | 277.1 | 278 | 12. |
|                                                                                              | 027   | 5358  | .16 | 763 |
|                                                                                              |       |       | 095 |     |
| 2-Aminoflubendazole                                                                          | 0.004 | 255.0 | 256 | 3.1 |
|                                                                                              | 68    | 8547  | .09 | 01  |
|                                                                                              |       |       | 274 |     |
| N-{3-[5-(tert-Butyl)-2-methyl-3-furyl]-1-<br>methyl-1H-pyrazol-5-yl}-2-<br>methylbenzamide   | -     | 351.1 | 352 | 16. |
|                                                                                              | 0.000 | 9417  | .20 | 132 |
|                                                                                              | 51    |       | 145 |     |
| N-benzyl-N-isopropyl-N'-(4-<br>isopropylphenyl)thiourea                                      | 0.006 | 326.1 | 327 | 20. |
|                                                                                              | 06    | 8773  | .19 | 314 |
|                                                                                              |       |       | 501 |     |
| 2-[2-nitro-4-<br>(trifluoromethyl)phenoxy]ethyl 5-methyl-<br>3-phenylisoxazole-4-carboxylate | -     | 265.1 | 266 | 7.1 |
|                                                                                              | 170.9 | 0633  | .11 | 92  |
|                                                                                              | 8189  |       | 359 |     |
| Phenylbutazone                                                                               | -     | 308.1 | 307 | 12. |
|                                                                                              | 0.005 | 4723  | .13 | 167 |
|                                                                                              | 25    |       | 995 |     |
| (2E)-6-hydroxy-2-methyl-6-(4-<br>methylphenyl)hept-2-enoic acid                              | 21.98 | 270.1 | 271 | 6.1 |
|                                                                                              | 054   | 2178  | .12 | 35  |
|                                                                                              |       |       | 906 |     |
| JWH-149                                                                                      | -     | 369.2 | 370 | 13. |
|                                                                                              | 0.004 | 0455  | .21 | 707 |
|                                                                                              | 72    |       | 182 |     |
| DL-Metanephrine                                                                              | 0.000 | 197.1 | 198 | 4.8 |
|                                                                                              | 17    | 0536  | .11 | 71  |
|                                                                                              |       |       | 264 |     |
| Diproqualone                                                                                 | -     | 217.0 | 218 | 10. |
|                                                                                              | 17.02 | 7401  | .08 | 64  |
|                                                                                              | 643   |       | 131 |     |
| N-Benzylformamide                                                                            | 0.000 | 135.0 | 136 | 2.8 |
|                                                                                              | 08    | 6849  | .07 | 6   |
|                                                                                              |       |       | 574 |     |
| Aspartame                                                                                    | 0.000 | 294.1 | 295 | 9.1 |
|                                                                                              | 32    | 2189  | .12 | 43  |
|                                                                                              |       |       | 912 |     |
| 6-Methoxysalicylic acid                                                                      | -     | 168.0 | 167 | 8.0 |
|                                                                                              | 0.000 | 414   | .03 | 85  |
|                                                                                              | 86    |       | 412 |     |
| Desmethyl nefopam                                                                            | -     | 239.1 | 240 | 4.9 |

|                                                                                                                     |       |        |     |     |
|---------------------------------------------------------------------------------------------------------------------|-------|--------|-----|-----|
|                                                                                                                     | 0.004 | 2697   | .13 | 56  |
|                                                                                                                     | 05    |        | 423 |     |
| N-((2R,3S,4R,5S)-3,4-Dihydroxy-5-[2-(isopropylamino)-2-oxoethyl]tetrahydro-2-furanyl)methyl)cyclopropanecarboxamide | 35.97 | 336.1  | 335 | 6.9 |
|                                                                                                                     | 398   | 425    | .13 | 59  |
|                                                                                                                     |       |        | 522 |     |
| 2-[2-(2-acetamido-4-methylpentanamido)propanamido]-3-hydroxypropanoic acid                                          | 0.000 | 331.1  | 332 | 5.9 |
|                                                                                                                     | 03    | 7437   | .18 | 94  |
|                                                                                                                     |       |        | 158 |     |
| (3S,9aS)-3-benzyl-octahydro-1H-pyrido[1,2-a]pyrazin-1-one                                                           | 21.98 | 266.1  | 267 | 6.9 |
|                                                                                                                     | 043   | 38     | .14 | 53  |
|                                                                                                                     |       |        | 526 |     |
| AUDA                                                                                                                | 0.003 | 392.3  | 393 | 26. |
|                                                                                                                     | 56    | 0745   | .31 | 154 |
|                                                                                                                     |       |        | 47  |     |
| FLK                                                                                                                 | 0.000 | 406.2  | 204 | 8.7 |
|                                                                                                                     | 32    | 5832   | .13 | 65  |
|                                                                                                                     |       |        | 651 |     |
| 3,8,9-trihydroxy-10-propyl-3,4,5,8,9,10-hexahydro-2H-oxecin-2-one                                                   | -     | 244.1  | 243 | 13. |
|                                                                                                                     | 0.000 | 3077   | .12 | 658 |
|                                                                                                                     | 3     |        | 355 |     |
| 3-(1,1,2,3,3,3-hexafluoropropyl)adamantane-1-carboxylic acid                                                        | 0.005 | 330.11 | 329 | 12. |
|                                                                                                                     | 07    | 052    | .10 | 835 |
|                                                                                                                     |       |        | 33  |     |
| N-((2R,4S,5R)-5-[6-(2-Bromophenyl)-2-methyl-4-pyrimidinyl]-1-azabicyclo[2.2.2]oct-2-yl)methyl-4-methylbenzamide     | 0.010 | 504.1  | 485 | 14. |
|                                                                                                                     | 33    | 628    | .14 | 596 |
|                                                                                                                     |       |        | 572 |     |
| $\gamma$ -Linolenic acid ethyl ester                                                                                | 24.02 | 330.2  | 313 | 21. |
|                                                                                                                     | 09    | 7678   | .27 | 687 |
|                                                                                                                     |       |        | 35  |     |
| 12-Oxo phytodienoic acid                                                                                            | -     | 242.1  | 275 | 18. |
|                                                                                                                     | 50.03 | 6698   | .20 | 642 |
|                                                                                                                     |       |        | 047 |     |
| Isorhapontigenin                                                                                                    | -     | 212.0  | 257 | 12. |
|                                                                                                                     | 46.00 | 8373   | .08 | 325 |
|                                                                                                                     |       |        | 194 |     |
| Stearoyl Ethanolamide                                                                                               | -     | 309.3  | 310 | 22. |
|                                                                                                                     | 18.01 | 0288   | .31 | 975 |
|                                                                                                                     |       |        | 015 |     |
| N1-(3,5-dichlorophenyl)-3-morpholinopropanamide                                                                     | 0.005 | 302.0  | 301 | 9.6 |
|                                                                                                                     | 31    | 6419   | .05 | 49  |
|                                                                                                                     |       |        | 692 |     |

|                                                                                       |       |       |     |     |
|---------------------------------------------------------------------------------------|-------|-------|-----|-----|
| 3-(2,6-Dioxocyclohexyl)propanenitrile                                                 | 0.000 | 165.0 | 166 | 10. |
|                                                                                       | 06    | 7903  | .08 | 011 |
|                                                                                       |       |       | 632 |     |
| 3-[(phenylsulfonyl)amino]benzenesulfonamide                                           | 0.003 | 312.0 | 311 | 15. |
|                                                                                       | 36    | 272   | .01 | 16  |
|                                                                                       |       |       | 993 |     |
| 5-amino-2-(dimethylamino)benzoic acid                                                 | 0.000 | 180.0 | 181 | 8.5 |
|                                                                                       | 09    | 8997  | .09 | 98  |
|                                                                                       |       |       | 724 |     |
| 3,5,7-trihydroxy-2-phenyl-4H-chromen-4-one                                            | 0.000 | 270.0 | 271 | 14. |
|                                                                                       | 2     | 5302  | .06 | 043 |
|                                                                                       |       |       | 024 |     |
| (3R)-8-hydroxy-3-(4-methoxyphenyl)-3,4-dihydro-1H-2-benzopyran-1-one                  | 0.000 | 270.0 | 269 | 15. |
|                                                                                       | 25    | 8946  | .08 | 237 |
|                                                                                       |       |       | 218 |     |
| Sedanolid                                                                             | -     | 194.1 | 227 | 16. |
|                                                                                       | 0.000 | 3053  | .16 | 564 |
|                                                                                       | 15    |       | 394 |     |
| Diproqualone                                                                          | -     | 234.1 | 235 | 11. |
|                                                                                       | 0.000 | 0037  | .10 | 253 |
|                                                                                       | 07    |       | 765 |     |
| 2-Methoxyresorcinol                                                                   | 0.000 | 140.0 | 141 | 8.4 |
|                                                                                       | 14    | 4749  | .05 | 51  |
|                                                                                       |       |       | 476 |     |
| Crotetamide                                                                           | -     | 226.1 | 227 | 14. |
|                                                                                       | 0.000 | 6803  | .17 | 065 |
|                                                                                       | 1     |       | 531 |     |
| 3-hydroxy-3-methylpentanedioic acid                                                   | -     | 162.0 | 180 | 1.3 |
|                                                                                       | 0.000 | 5271  | .08 | 38  |
|                                                                                       | 12    |       | 65  |     |
| Avocadyne 1-acetate                                                                   | -     | 276.2 | 309 | 20. |
|                                                                                       | 50.03 | 0876  | .24 | 581 |
|                                                                                       | 695   |       | 219 |     |
| Diundecyl phthalate                                                                   | 39.99 | 514.3 | 497 | 17. |
|                                                                                       | 459   | 655   | .36 | 203 |
|                                                                                       |       |       | 224 |     |
| 2-(2-pyridyl)-2-{2-[4-(trifluoromethoxy)phenyl]hydrazono}acetone nitrile              | 0.004 | 306.0 | 305 | 12. |
|                                                                                       | 74    | 7759  | .07 | 682 |
|                                                                                       |       |       | 031 |     |
| 1-(1H-indol-1-yl)-3-[(2-{3-(trifluoromethyl)pyridin-2-yl}amino)ethylamino]propan-2-ol | -     | 378.1 | 379 | 6.6 |
|                                                                                       | 0.001 | 6527  | .17 | 96  |
|                                                                                       | 48    |       | 255 |     |
| 2-[(1S,4S,5S)-5-Isopropyl-4-[(4-methoxyphenyl)sulfonyl]amino)methyl]-                 | 432.2 | 864.4 | 863 | 17. |
|                                                                                       | 0604  | 1432  | .40 | 01  |



|                                                                                                                               |       |       |     |     |
|-------------------------------------------------------------------------------------------------------------------------------|-------|-------|-----|-----|
| 2-methyl-2-cyclohexen-1-yl]-N-(2-propyn-1-yl)acetamide                                                                        |       |       | 723 |     |
| 4-Butyl-N-(3-cyano-2-thienyl)benzamide                                                                                        | -     | 224.0 | 283 | 7.5 |
|                                                                                                                               | 60.01 | 7986  | .09 | 37  |
|                                                                                                                               |       | 847   |     | 384 |
| N-(5-acetamidopentyl)acetamide                                                                                                | 21.98 | 208.1 | 209 | 6.9 |
|                                                                                                                               | 462   | 2145  | .12 |     |
|                                                                                                                               |       |       |     | 872 |
| URB937                                                                                                                        | -     | 354.1 | 399 | 7.0 |
|                                                                                                                               | 0.005 | 5292  | .15 | 4   |
|                                                                                                                               |       | 04    |     | 106 |
| Posaconazole                                                                                                                  | -     | 700.3 | 701 | 17. |
|                                                                                                                               | 0.002 | 2744  | .33 | 777 |
|                                                                                                                               |       | 27    |     | 472 |
| 1-Methylxanthine                                                                                                              | -     | 166.0 | 165 | 1.3 |
|                                                                                                                               | 0.002 | 4666  | .03 | 88  |
|                                                                                                                               |       | 42    |     | 938 |
| D-(+)-Arabitol                                                                                                                | -     | 152.0 | 197 | 1.3 |
|                                                                                                                               | 0.000 | 6757  | .06 | 55  |
|                                                                                                                               |       | 91    |     | 595 |
| 2-[(1S,4S,5S)-5-Isopropyl-4-({[(4-methoxyphenyl)sulfonyl]amino}methyl)-2-methyl-2-cyclohexen-1-yl]-N-(2-propyn-1-yl)acetamide | 432.2 | 864.4 | 863 | 17. |
|                                                                                                                               | 0668  | 1496  | .40 | 568 |
|                                                                                                                               |       |       |     | 782 |
| N-[(3S,3aS,8S,9S,9aS,9bS)-3,5a,9-Trimethyl-2-oxododecahydronaphtho[1,2-b]furan-8-yl]acetamide                                 | -     | 293.1 | 294 | 12. |
|                                                                                                                               | 0.000 | 9902  | .20 | 588 |
|                                                                                                                               |       | 07    |     | 63  |
| N1-[3-(2,3-diphenyl-1H-inden-1-ylidene)prop-1-enyl]-N1-methylaniline                                                          | 17.02 | 428.2 | 412 | 11. |
|                                                                                                                               | 958   | 2828  | .20 | 745 |
|                                                                                                                               |       |       |     | 911 |
| Calocarpin                                                                                                                    | 0.006 | 324.1 | 323 | 8.6 |
|                                                                                                                               | 22    | 4238  | .13 | 4   |
|                                                                                                                               |       |       |     | 51  |
| 4-Hydroxymandelic acid                                                                                                        | 0.002 | 168.0 | 167 | 14. |
|                                                                                                                               | 45    | 4471  | .03 | 57  |
|                                                                                                                               |       |       |     | 743 |
| Pentoxifylline                                                                                                                | 0.000 | 278.1 | 279 | 7.1 |
|                                                                                                                               | 22    | 3811  | .14 | 51  |
|                                                                                                                               |       |       |     | 539 |
| 1,7-bis(4-hydroxyphenyl)heptan-3-one                                                                                          | -     | 298.1 | 281 | 18. |
|                                                                                                                               | 0.000 | 5673  | .15 | 706 |
|                                                                                                                               |       | 17    |     | 347 |
| 1-[(2R,4S,5R)-5-Ethenyl-1-                                                                                                    | -     | 286.2 | 287 | 6.3 |

|                                                                                                                                                                                                                                                                                                               |       |        |     |     |
|---------------------------------------------------------------------------------------------------------------------------------------------------------------------------------------------------------------------------------------------------------------------------------------------------------------|-------|--------|-----|-----|
| azabicyclo[2.2.2]octan-2-yl]-N-[(4-methoxyphenyl)methyl]methanamine                                                                                                                                                                                                                                           | 0.003 | 0071   | .20 | 06  |
| U-44069                                                                                                                                                                                                                                                                                                       | 8     |        | 798 |     |
|                                                                                                                                                                                                                                                                                                               | -     | 332.2  | 333 | 14. |
|                                                                                                                                                                                                                                                                                                               | 18.01 | 3505   | .24 | 076 |
|                                                                                                                                                                                                                                                                                                               | 066   |        | 231 |     |
| 2-Anisic acid                                                                                                                                                                                                                                                                                                 | -     | 152.0  | 151 | 11. |
|                                                                                                                                                                                                                                                                                                               | 0.000 | 4635   | .03 | 366 |
|                                                                                                                                                                                                                                                                                                               | 99    |        | 905 |     |
| Crotetamide                                                                                                                                                                                                                                                                                                   | -     | 226.1  | 227 | 14. |
|                                                                                                                                                                                                                                                                                                               | 0.000 | 6802   | .17 | 233 |
|                                                                                                                                                                                                                                                                                                               | 11    |        | 529 |     |
| Asparagine                                                                                                                                                                                                                                                                                                    | -     | 132.0  | 131 | 1.2 |
|                                                                                                                                                                                                                                                                                                               | 0.001 | 5226   | .04 | 78  |
|                                                                                                                                                                                                                                                                                                               | 23    |        | 498 |     |
| Fluvastatin                                                                                                                                                                                                                                                                                                   | 0.005 | 411.19 | 412 | 10. |
|                                                                                                                                                                                                                                                                                                               | 63    | 021    | .19 | 935 |
|                                                                                                                                                                                                                                                                                                               |       |        | 745 |     |
| 2-[(4,5-dimethoxy-2-nitrophenethyl)imino]methyl}phenol                                                                                                                                                                                                                                                        | -     | 330.11 | 331 | 2.2 |
|                                                                                                                                                                                                                                                                                                               | 0.004 | 745    | .12 | 34  |
|                                                                                                                                                                                                                                                                                                               | 12    |        | 473 |     |
| (2S,3S,4S,5R,6R)-6-[[[(2S,3R,4R,6aR,6bS,8aS,12aS,14bR)-4-formyl-2-hydroxy-4,6a,6b,11,11,14b-hexamethyl-8a-({[(2S,3R,4S,5S,6R)-3,4,5-trihydroxy-6-(hydroxymethyl)oxan-2-yl]oxy}carbonyl)-1,2,3,4,4a,5,6,6a,6b,7,8,8a,9,10,11,12,12a,14,14a,14b-icosahydricen-3-yl]oxy}-3,4,5-trihydroxyoxane-2-carboxylic acid | -     | 393.2  | 825 | 21. |
| 5-isopropyl-3,8-dimethylazulene-1-carbaldehyde 1-(4-nitrophenyl)hydrazone                                                                                                                                                                                                                                     | 431.1 | 3094   | .42 | 127 |
|                                                                                                                                                                                                                                                                                                               | 885   |        | 505 |     |
|                                                                                                                                                                                                                                                                                                               | 0.005 | 361.1  | 362 | 4.9 |
|                                                                                                                                                                                                                                                                                                               | 72    | 8475   | .19 | 79  |
|                                                                                                                                                                                                                                                                                                               |       |        | 196 |     |
| MCOPPB                                                                                                                                                                                                                                                                                                        | -     | 386.3  | 409 | 24. |
|                                                                                                                                                                                                                                                                                                               | 21.98 | 391    | .32 | 397 |
|                                                                                                                                                                                                                                                                                                               | 62    |        | 828 |     |
| PharmaGSID 48511                                                                                                                                                                                                                                                                                              | 0.003 | 543.2  | 544 | 26. |
|                                                                                                                                                                                                                                                                                                               | 44    | 8038   | .28 | 758 |
|                                                                                                                                                                                                                                                                                                               |       |        | 766 |     |
| Propyl gallate                                                                                                                                                                                                                                                                                                | 0.002 | 212.0  | 211 | 11. |
|                                                                                                                                                                                                                                                                                                               | 74    | 7121   | .06 | 634 |
|                                                                                                                                                                                                                                                                                                               |       |        | 393 |     |
| 4-oxododecanedioic acid                                                                                                                                                                                                                                                                                       | -     | 244.1  | 245 | 12. |
|                                                                                                                                                                                                                                                                                                               | 0.000 | 3085   | .13 | 906 |
|                                                                                                                                                                                                                                                                                                               | 23    |        | 812 |     |

|                                                                                                                               |       |        |     |     |
|-------------------------------------------------------------------------------------------------------------------------------|-------|--------|-----|-----|
| N-[(1S,4S,6S)-6-Isopropyl-4-{2-[(4-methoxybenzyl)amino]-2-oxoethyl}-3-methyl-2-cyclohexen-1-yl)methyl]cyclopentanecarboxamide | 18.01 | 458.3  | 441 | 23. |
|                                                                                                                               | 457   | 1846   | .31 | 99  |
|                                                                                                                               |       |        | 522 |     |
| ethyl 4-[(3-morpholinopropyl)amino]carbothioyl}amino)benzoate                                                                 | -     | 351.1  | 352 | 7.6 |
|                                                                                                                               | 0.007 | 5401   | .16 | 4   |
|                                                                                                                               | 65    |        | 125 |     |
| 3-hydroxyquinuclidine-3-carbonitrile hydrochloride                                                                            | 0.000 | 152.0  | 153 | 9.0 |
|                                                                                                                               | 16    | 9513   | .10 | 12  |
|                                                                                                                               |       |        | 24  |     |
| 3-[2-(1,3-Benzodioxol-5-yl)-7-methoxy-1-benzofuran-5-yl]-3-hydroxypropyl hexopyranoside                                       | -     | 490.1  | 549 | 1.4 |
|                                                                                                                               | 14.00 | 5338   | .16 | 92  |
|                                                                                                                               | 978   |        | 73  |     |
| 5-methyl-3-(3,4,5-trimethoxyphenyl)-1,2,4-oxadiazole                                                                          | -     | 250.0  | 251 | 11. |
|                                                                                                                               | 0.000 | 9499   | .10 | 604 |
|                                                                                                                               | 37    |        | 226 |     |
| 2-hydroxy-6-[2-hydroxy-6-(hydroxymethyl)-4-methoxyphenoxy]-4-methylbenzoic acid                                               | -     | 302.0  | 303 | 12. |
|                                                                                                                               | 18.01 | 789    | .08 | 659 |
|                                                                                                                               | 071   |        | 597 |     |
| (1S,5R,9R,13R)-1,5,9-trimethyl-11,14,15,16-tetraoxatetracyclo[10.3.1.0.0',0.0]hexadecan-10-one                                | -     | 282.1  | 283 | 13. |
|                                                                                                                               | 0.000 | 4662   | .15 | 159 |
|                                                                                                                               | 1     |        | 39  |     |
| N-[1,1'-Biphenyl]-4-ylacetamide                                                                                               | -     | 211.09 | 423 | 2.5 |
|                                                                                                                               | 0.004 | 528    | .19 | 85  |
|                                                                                                                               | 43    |        | 717 |     |
| 2-Methoxybenzaldehyde                                                                                                         | 0.000 | 136.0  | 336 | 11. |
|                                                                                                                               | 79    | 5322   | .12 | 507 |
|                                                                                                                               |       |        | 225 |     |
| MN-18 N-(5-hydroxypentyl) metabolite                                                                                          | -     | 373.1  | 374 | 9.0 |
|                                                                                                                               | 0.004 | 7485   | .18 | 63  |
|                                                                                                                               | 17    |        | 213 |     |
| 4-Methoxybenzaldehyde N-[6-(tert-butyl)thieno[3,2-d]pyrimidin-4-yl]hydrazone                                                  | -     | 340.1  | 339 | 17. |
|                                                                                                                               | 0.004 | 3106   | .12 | 483 |
|                                                                                                                               | 73    |        | 378 |     |
| 6 $\beta$ -Naloxol                                                                                                            | -     | 329.1  | 328 | 8.5 |
|                                                                                                                               | 0.003 | 589    | .15 | 6   |
|                                                                                                                               | 81    |        | 182 |     |
| 4-ethoxy-N-(4-methoxyphenyl)methylene]aniline                                                                                 | -     | 255.1  | 256 | 5.3 |
|                                                                                                                               | 0.004 | 219    | .12 | 22  |
|                                                                                                                               | 02    |        | 918 |     |
| QQH                                                                                                                           | 0.003 | 411.19 | 412 | 11. |
|                                                                                                                               | 85    | 048    | .19 | 212 |
|                                                                                                                               |       |        | 775 |     |

|                                                                                                                                |       |        |     |     |
|--------------------------------------------------------------------------------------------------------------------------------|-------|--------|-----|-----|
| WLH                                                                                                                            | -     | 454.2  | 455 | 1.2 |
|                                                                                                                                | 0.005 | 2745   | .23 | 08  |
|                                                                                                                                | 4     |        | 465 |     |
| 5-(benzyloxy)-2-(hydroxymethyl)-1,4-dihydropyridin-4-one                                                                       | 0.000 | 231.0  | 232 | 5.0 |
|                                                                                                                                | 1     | 8965   | .09 | 9   |
|                                                                                                                                |       |        | 692 |     |
| Corticosterone                                                                                                                 | 35.96 | 382.1  | 427 | 10. |
|                                                                                                                                | 973   | 8414   | .18 | 859 |
|                                                                                                                                |       |        | 231 |     |
| 2-(2'-Hydroxy-3,5'-di-tert-butylphenyl)-5-chlorobenzotriazole                                                                  | -     | 357.1  | 356 | 9.0 |
|                                                                                                                                | 0.006 | 5385   | .14 | 22  |
|                                                                                                                                | 94    |        | 658 |     |
| {(3S)-3-[5-(2-Fluorophenyl)-1,3,4-oxadiazol-2-yl]-1-pyrrolidinyl}(phenyl)methanone                                             | 0.004 | 337.1  | 338 | 7.8 |
|                                                                                                                                | 59    | 2724   | .13 | 11  |
|                                                                                                                                |       |        | 452 |     |
| 2-Benzyl-5-[(3S)-1-cyclohexyl-3-pyrrolidinyl]-1,3,4-oxadiazole                                                                 | -     | 311.19 | 312 | 6.7 |
|                                                                                                                                | 0.003 | 588    | .20 | 48  |
|                                                                                                                                | 88    |        | 316 |     |
| N-[3-(aminosulfonyl)phenyl]-2,3-dihydro-1,4-benzodioxine-2-carboxamide                                                         | -     | 274.0  | 333 | 1.7 |
|                                                                                                                                | 60.01 | 4551   | .05 | 24  |
|                                                                                                                                | 683   |        | 936 |     |
| N-[4-(Aminosulfonyl)phenyl]-2-{[4-methyl-5-(4-pyridinyl)-4H-1,2,4-triazol-3-yl]sulfonyl}acetamide                              | 0.005 | 404.0  | 403 | 14. |
|                                                                                                                                | 33    | 7786   | .07 | 365 |
|                                                                                                                                |       |        | 059 |     |
| Calocarpin                                                                                                                     | 0.006 | 324.1  | 323 | 9.9 |
|                                                                                                                                | 16    | 4232   | .13 | 45  |
|                                                                                                                                |       |        | 504 |     |
| AKK                                                                                                                            | -     | 327.2  | 328 | 15. |
|                                                                                                                                | 18.00 | 3036   | .23 | 073 |
|                                                                                                                                | 724   |        | 764 |     |
| (4aR,5R,6R)-6-hydroxy-4a,5-dimethyl-3-(prop-1-en-2-yl)-2,4a,5,6,7,8-hexahydronaphthalen-2-one                                  | 21.98 | 254.1  | 255 | 7.7 |
|                                                                                                                                | 029   | 2662   | .13 | 32  |
|                                                                                                                                |       |        | 39  |     |
| N-{[(1S,4S,6S)-6-Isopropyl-4-{2-[(4-methoxybenzyl)amino]-2-oxoethyl}-3-methyl-2-cyclohexen-1-yl]methyl}cyclopentanecarboxamide | 0.003 | 440.3  | 441 | 24. |
|                                                                                                                                | 52    | 0741   | .31 | 983 |
|                                                                                                                                |       |        | 467 |     |
| Threonine                                                                                                                      | -     | 119.05 | 118 | 1.2 |
|                                                                                                                                | 0.001 | 694    | .04 | 88  |
|                                                                                                                                | 31    |        | 958 |     |
| 3-[4-(tert-butyl)anilino]-2-(3-thienylcarbonyl)acrylonitrile                                                                   | -     | 310.1  | 309 | 15. |
|                                                                                                                                | 0.005 | 0884   | .10 | 13  |
|                                                                                                                                | 14    |        | 156 |     |
| (3β,5α,9ξ)-3-[[β-D-Glucopyranosyl-                                                                                             | 0.000 | 872.4  | 871 | 16. |

|                                                                                                                                  |        |        |     |     |
|----------------------------------------------------------------------------------------------------------------------------------|--------|--------|-----|-----|
| (1->6)-β-D-glucopyranosyl-(1->4)-6-deoxy-3-O-methyl-β-L-idopyranosyl]oxy}-14-hydroxy-19-oxocard-20(22)-enolide                   | 38     | 0455   | .39 | 098 |
| Arecoline                                                                                                                        | 0.000  | 155.0  | 156 | 3.2 |
|                                                                                                                                  | 16     | 9479   | .10 | 12  |
|                                                                                                                                  |        |        | 207 |     |
| 4-{5-[(3S)-1-(3,4-Difluorobenzyl)-3-pyrrolidinyl]-1,3,4-oxadiazol-2-yl}-N,N-dimethylaniline                                      | 0.002  | 384.1  | 385 | 12. |
|                                                                                                                                  | 93     | 7909   | .18 | 761 |
|                                                                                                                                  |        |        | 637 |     |
| 3-hydroxy-3-methylpentanedioic acid                                                                                              | 17.02  | 179.0  | 180 | 1.6 |
|                                                                                                                                  | 653    | 7935   | .08 | 72  |
|                                                                                                                                  |        |        | 664 |     |
| 6,8-dichloro-3-(5,6-dimethyl-1H-benzimidazol-2-yl)-2H-chromen-2-one hydrate                                                      | -      | 244.0  | 357 | 7.3 |
|                                                                                                                                  | 113.99 | 3554   | .02 | 03  |
|                                                                                                                                  | 204    |        | 115 |     |
| 2-(3,3-Dimethylbutanoyl)-8-[3-(trifluoromethyl)phenyl]-1,3,4,12a-tetrahydropyrazino[2,1-c][1,4]benzodiazepine-6,12(2H,11H)-dione | 46.01  | 519.2  | 518 | 8.0 |
|                                                                                                                                  | 411    | 0674   | .19 | 54  |
|                                                                                                                                  |        |        | 946 |     |
| O-[3-(3-methoxypropyl)-5,6-dimethyl-2-thioxo-2,3-dihydro-4-pyrimidinyl] N,N-diethylcarbamoithioate                               | -      | 343.1  | 342 | 7.2 |
|                                                                                                                                  | 0.000  | 3811   | .13 | 16  |
|                                                                                                                                  | 71     |        | 083 |     |
| 3-Desoxy-3,4-methylenedioxy pyrovalerone                                                                                         | -      | 273.1  | 274 | 17. |
|                                                                                                                                  | 0.000  | 7266   | .17 | 62  |
|                                                                                                                                  | 22     |        | 993 |     |
| N4-[2-({[4-(trifluoromethyl)phenyl]sulfonyl}amino)ethyl]morpholine-4-carboxamide                                                 | -      | 381.0  | 380 | 1.4 |
|                                                                                                                                  | 0.004  | 9297   | .08 | 48  |
|                                                                                                                                  | 04     |        | 569 |     |
| Phthalic acid                                                                                                                    | -      | 166.0  | 167 | 13. |
|                                                                                                                                  | 0.000  | 2657   | .03 | 767 |
|                                                                                                                                  | 04     |        | 384 |     |
| 3-Ethyl-4-hydroxy-1-phenyl-1,2-dihydroquinolin-2-one                                                                             | -      | 265.1  | 266 | 7.6 |
|                                                                                                                                  | 0.004  | 061    | .11 | 45  |
|                                                                                                                                  | 18     |        | 334 |     |
| CMPF                                                                                                                             | -      | 240.0  | 239 | 13. |
|                                                                                                                                  | 0.000  | 9956   | .09 | 779 |
|                                                                                                                                  | 21     |        | 229 |     |
| Calocarpin                                                                                                                       | 0.006  | 324.1  | 323 | 6.7 |
|                                                                                                                                  | 28     | 4244   | .13 | 56  |
|                                                                                                                                  |        |        | 516 |     |
| 6-Methylindole                                                                                                                   | -      | 114.04 | 132 | 7.2 |
|                                                                                                                                  | 17.02  | 706    | .08 | 96  |

|                                                                                                    |       |        |     |     |
|----------------------------------------------------------------------------------------------------|-------|--------|-----|-----|
|                                                                                                    | 644   |        | 087 |     |
| N-{4-[(2R,3R)-3-(Hydroxymethyl)-4-methyl-5-oxo-2-morpholinyl]phenyl}acetamide                      | 0.000 | 278.1  | 279 | 6.4 |
|                                                                                                    | 28    | 2694   | .13 | 78  |
|                                                                                                    |       |        | 422 |     |
| 2-(1,3-Benzodioxol-5-yl)-4,5,6,7-tetramethyl-1H-benzimidazole                                      | -     | 234.11 | 293 | 10. |
|                                                                                                    | 60.02 | 077    | .12 | 337 |
|                                                                                                    | 606   |        | 473 |     |
| Fluvastatin                                                                                        | 0.005 | 411.19 | 412 | 11. |
|                                                                                                    | 59    | 017    | .19 | 799 |
|                                                                                                    |       |        | 745 |     |
| 6-Chloro-N2,N3-diethylquinoxaline-2,3-diamine                                                      | -     | 250.0  | 251 | 10. |
|                                                                                                    | 0.003 | 9532   | .10 | 516 |
|                                                                                                    | 2     |        | 26  |     |
| Famoxadone                                                                                         | -     | 374.1  | 373 | 10. |
|                                                                                                    | 0.001 | 2481   | .11 | 875 |
|                                                                                                    | 84    |        | 74  |     |
| Indole-3-acetyl-L-aspartic acid                                                                    | -     | 290.0  | 579 | 11. |
|                                                                                                    | 0.000 | 8985   | .17 | 742 |
|                                                                                                    | 42    |        | 206 |     |
| Propyphenazone                                                                                     | -     | 230.1  | 231 | 1.2 |
|                                                                                                    | 0.004 | 3777   | .14 | 8   |
|                                                                                                    | 14    |        | 505 |     |
| Famoxadone                                                                                         | 0.006 | 374.1  | 373 | 11. |
|                                                                                                    | 5     | 3316   | .12 | 117 |
|                                                                                                    |       |        | 589 |     |
| Xanthohumol                                                                                        | -     | 354.1  | 355 | 18. |
|                                                                                                    | 0.000 | 4623   | .15 | 962 |
|                                                                                                    | 5     |        | 35  |     |
| 2-(1,3-Benzodioxol-5-yl)-4,5,6,7-tetramethyl-1H-benzimidazole                                      | -     | 294.1  | 293 | 9.8 |
|                                                                                                    | 0.005 | 3182   | .12 | 47  |
|                                                                                                    | 01    |        | 454 |     |
| Naratriptan                                                                                        | -     | 335.1  | 336 | 9.0 |
|                                                                                                    | 0.007 | 5926   | .16 | 9   |
|                                                                                                    | 49    |        | 65  |     |
| 5-methoxy-2-([2-(2-thienyl)ethyl]imino)methylphenol                                                | 0.004 | 261.0  | 262 | 5.5 |
|                                                                                                    | 15    | 865    | .09 | 79  |
|                                                                                                    |       |        | 378 |     |
| 5,7-Dihydroxy-2-(4-hydroxy-3-methoxyphenyl)-6-(3-methyl-2-buten-1-yl)-2,3-dihydro-4H-chromen-4-one | -     | 370.1  | 371 | 15. |
|                                                                                                    | 0.000 | 4113   | .14 | 829 |
|                                                                                                    | 51    |        | 828 |     |
| N2-phenyl-4-(piperidinomethyl)-1,3-thiazol-2-amine                                                 | 0.002 | 273.1  | 274 | 1.4 |
|                                                                                                    | 31    | 3228   | .13 | 88  |
|                                                                                                    |       |        | 956 |     |
| {(2R,4S,5R)-5-[3-(3,4-                                                                             | 35.96 | 512.2  | 511 | 12. |

|                                                                                                                                             |       |        |     |     |     |
|---------------------------------------------------------------------------------------------------------------------------------------------|-------|--------|-----|-----|-----|
| Dimethoxyphenyl)-1-methyl-1H-pyrazol-5-yl]-1-azabicyclo[2.2.2]oct-2-yl}methyl phenylcarbamate                                               | 786   | 1022   | .20 | 119 | 294 |
| N'1-(3-phenylprop-2-enylidene)-3-(4-hydroxyphenyl)propanohydrazide                                                                          | -     | 294.1  | 293 | 9.6 |     |
|                                                                                                                                             | 0.004 | 3189   | .12 | 27  |     |
|                                                                                                                                             | 93    |        | 469 |     |     |
| Enrofloxacin                                                                                                                                | -     | 300.1  | 342 | 9.5 |     |
|                                                                                                                                             | 59.04 | 2115   | .15 | 3   |     |
|                                                                                                                                             | 337   |        | 491 |     |     |
| 3,4-Methylenedioxy-N-benzylcathinone                                                                                                        | -     | 283.11 | 284 | 5.5 |     |
|                                                                                                                                             | 0.003 | 69     | .12 | 44  |     |
|                                                                                                                                             | 94    |        | 418 |     |     |
| Pyridoxine                                                                                                                                  | 0.000 | 169.0  | 170 | 7.2 |     |
|                                                                                                                                             | 11    | 7401   | .08 | 03  |     |
|                                                                                                                                             |       |        | 128 |     |     |
| (3S,9aS)-3-benzyl-octahydro-1H-pyrido[1,2-a]pyrazin-1-one                                                                                   | -     | 234.11 | 267 | 6.6 |     |
|                                                                                                                                             | 10.04 | 183    | .14 | 12  |     |
|                                                                                                                                             | 573   |        | 532 |     |     |
| (1S,2R,9R,11R,12R,15R)-11-hydroxy-2,6,9,15-tetramethyl-13-oxatetracyclo[10.2.1.0.0.0]pentadeca-4,6-diene-3,8,14-trione                      | 21.98 | 338.11 | 339 | 18. |     |
|                                                                                                                                             | 393   | 501    | .12 | 023 |     |
|                                                                                                                                             |       |        | 228 |     |     |
| (1R,9R)-3-[(E)-2-(4-Chlorophenyl)vinyl]-11-(propylsulfonyl)-7,11-diazatricyclo[7.3.1.0.2,7]trideca-2,4-dien-6-one                           | 46.00 | 478.1  | 477 | 7.3 |     |
|                                                                                                                                             | 52    | 3264   | .12 | 38  |     |
|                                                                                                                                             |       |        | 537 |     |     |
| Methyl N-[(2R)-1-(methoxyacetyl)-4-(3-pyridinylcarbonyl)-2-piperazinyl]carbonyl}-O-methyl-L-tyrosinate                                      | 0.005 | 498.2  | 499 | 1.2 |     |
|                                                                                                                                             | 8     | 1725   | .22 | 59  |     |
|                                                                                                                                             |       |        | 44  |     |     |
| (E)-3-(2-chloro-3,4-dimethoxyphenyl)-N-[6-(4-chlorophenoxy)pyridin-3-yl]prop-2-enamide                                                      | 0.008 | 444.0  | 443 | 11. |     |
|                                                                                                                                             | 19    | 7255   | .06 | 639 |     |
|                                                                                                                                             |       |        | 528 |     |     |
| (3R,4S)-4,6,8-Trihydroxy-7-methoxy-3-methyl-3,4-dihydro-1H-isochromen-1-one                                                                 | 0.000 | 240.0  | 239 | 10. |     |
|                                                                                                                                             | 04    | 6343   | .05 | 278 |     |
|                                                                                                                                             |       |        | 615 |     |     |
| N-Vinyl-2-pyrrolidone                                                                                                                       | 0.000 | 111.06 | 112 | 10. |     |
|                                                                                                                                             | 31    | 873    | .07 | 941 |     |
|                                                                                                                                             |       |        | 603 |     |     |
| (3beta,8xi,9xi,14xi,17xi)-3-[[Hexopyranosyl-(1-6)hexopyranosyl-(1-4)-2,6-dideoxy-3-O-methylhexopyranosyl]oxy]-14-hydroxycard-20(22)-enolide | 0.000 | 842.4  | 841 | 16. |     |
|                                                                                                                                             | 8     | 308    | .42 | 253 |     |
|                                                                                                                                             |       |        | 352 |     |     |

|                                                                                                                    |        |        |     |     |
|--------------------------------------------------------------------------------------------------------------------|--------|--------|-----|-----|
| Methyl N-{{(2S)-4-(isopropylcarbamoyl)-1-(phenylsulfonyl)-2-piperazinyl}carbonyl}-3-(3-pyridinyl)-D-alaninate      | -      | 517.1  | 518 | 10. |
|                                                                                                                    | 0.004  | 9466   | .20 | 792 |
|                                                                                                                    | 84     |        | 19  |     |
| (2S,3R,4S,5S,6R)-2-(3-hydroxy-5-methylphenoxy)-6-(hydroxymethyl)oxane-3,4,5-triol                                  | 21.98  | 308.0  | 291 | 14. |
|                                                                                                                    | 401    | 8926   | .08 | 668 |
|                                                                                                                    |        |        | 597 |     |
| 2-[6-(1H-benzo[d]imidazol-2-yl)-2-pyridyl]-1H-benzo[d]imidazole                                                    | 19.01  | 330.1  | 311 | 9.0 |
|                                                                                                                    | 485    | 3194   | .11 | 77  |
|                                                                                                                    |        |        | 411 |     |
| Donepezil                                                                                                          | -      | 379.2  | 380 | 19. |
|                                                                                                                    | 0.000  | 1437   | .22 | 281 |
|                                                                                                                    | 37     |        | 165 |     |
| 4,4'-Diisocyanatodicyclohexylmethane                                                                               | 32.03  | 294.1  | 295 | 16. |
|                                                                                                                    | 021    | 9834   | .20 | 205 |
|                                                                                                                    |        |        | 529 |     |
| N-(5-methyl-3-phenyl-4-isoxazolyl)-N'-(2-morpholinophenyl)urea                                                     | -0.004 | 378.1  | 379 | 5.9 |
|                                                                                                                    |        | 6519   | .17 | 82  |
|                                                                                                                    |        |        | 242 |     |
| ABL 127                                                                                                            | 21.97  | 354.1  | 355 | 16. |
|                                                                                                                    | 263    | 0985   | .11 | 42  |
|                                                                                                                    |        |        | 697 |     |
| 16 $\alpha$ -Hydroxydehydroepiandrosterone                                                                         | 17.02  | 321.2  | 322 | 20. |
|                                                                                                                    | 64     | 3024   | .23 | 216 |
|                                                                                                                    |        |        | 752 |     |
| Nipecotinic acid                                                                                                   | 0.000  | 129.0  | 130 | 7.0 |
|                                                                                                                    | 32     | 793    | .08 | 92  |
|                                                                                                                    |        |        | 656 |     |
| Roquefortine C                                                                                                     | -      | 389.1  | 390 | 5.5 |
|                                                                                                                    | 0.005  | 8014   | .18 | 98  |
|                                                                                                                    | 03     |        | 738 |     |
| 4,4'-Sulfonylbis[2-(prop-2-en-1-yl)phenol]                                                                         | 0.002  | 330.0  | 329 | 8.4 |
|                                                                                                                    | 86     | 9544   | .08 | 62  |
|                                                                                                                    |        |        | 817 |     |
| 1,3,5-trihydroxy-4-{{(2E)-3-(3-hydroxy-4-methoxyphenyl)prop-2-enoyl}oxy}cyclohexane-1-carboxylic acid              | -      | 368.11 | 367 | 9.8 |
|                                                                                                                    | 0.000  | 07     | .10 | 43  |
|                                                                                                                    | 03     |        | 342 |     |
| Leucylproline                                                                                                      | 0.004  | 228.1  | 229 | 14. |
|                                                                                                                    | 01     | 514    | .15 | 419 |
|                                                                                                                    |        |        | 868 |     |
| [(1S,4S,6S)-6-Isopropyl-3-methyl-4-{2-oxo-2-[4-(2-pyrimidinyl)-1-piperazinyl]ethyl}-2-cyclohexen-1-yl]acetonitrile | -      | 349.2  | 382 | 12. |
|                                                                                                                    | 32.02  | 2467   | .25 | 704 |
|                                                                                                                    | 819    |        | 818 |     |



|                                                                                                          |       |       |     |     |
|----------------------------------------------------------------------------------------------------------|-------|-------|-----|-----|
| 11-Oxoetiocholanolone                                                                                    | -     | 286.1 | 287 | 20. |
|                                                                                                          | 18.01 | 9326  | .20 | 69  |
|                                                                                                          | 059   |       | 041 |     |
| N'-(2-chlorobenzoyl)-N,N-dimethylhydrazonoformamide                                                      | -     | 225.0 | 226 | 8.3 |
|                                                                                                          | 0.003 | 6378  | .07 | 46  |
|                                                                                                          | 11    |       | 106 |     |
| (3R,6aR,7S,12aS)-5,6,6a,7,8-pentahydroxy-3-methyl-1,2,3,4,5,6,6a,7,12,12a-decahydrotetraphene-1,12-dione | 21.98 | 382.1 | 383 | 18. |
|                                                                                                          | 394   | 0484  | .11 | 261 |
|                                                                                                          |       |       | 212 |     |
| Uridine monophosphate (UMP)                                                                              | 0.000 | 324.0 | 323 | 4.9 |
|                                                                                                          | 13    | 3599  | .02 |     |
|                                                                                                          |       |       | 872 |     |
| 3-hydroxy-2-octylpentanedioic acid                                                                       | -     | 242.1 | 243 | 14. |
|                                                                                                          | 18.01 | 5178  | .15 | 431 |
|                                                                                                          | 059   |       | 906 |     |
| 5-(3-chloro-4-methylanilino)-1-methyl-1H-pyrazol-3-ol                                                    | -     | 237.0 | 236 | 9.6 |
|                                                                                                          | 0.003 | 6364  | .05 | 98  |
|                                                                                                          | 25    |       | 637 |     |
| 4-Methoxybenzaldehyde N-[6-(tert-butyl)thieno[3,2-d]pyrimidin-4-yl]hydrazone                             | 0.001 | 340.1 | 385 | 5.4 |
|                                                                                                          | 44    | 3722  | .13 | 23  |
|                                                                                                          |       |       | 547 |     |
| 4-(3,4-dimethylphenyl)-1-thia-4-azaspiro[4.5]decan-3-one                                                 | -     | 253.1 | 276 | 3.5 |
|                                                                                                          | 21.97 | 5505  | .14 | 2   |
|                                                                                                          | 934   |       | 429 |     |
| 2-Methyl-N-morpholino-6-(trifluoromethyl)nicotinamide                                                    | 0.002 | 289.1 | 290 | 5.1 |
|                                                                                                          | 41    | 0622  | .11 | 72  |
|                                                                                                          |       |       | 349 |     |
| Methoxyacetyl fentanyl                                                                                   | 0.007 | 352.2 | 353 | 16. |
|                                                                                                          | 02    | 2209  | .22 | 604 |
|                                                                                                          |       |       | 937 |     |
| 2-Isopropylmalic acid                                                                                    | -     | 176.0 | 175 | 8.3 |
|                                                                                                          | 0.000 | 6775  | .06 | 38  |
|                                                                                                          | 72    |       | 046 |     |
| PK 11195                                                                                                 | -     | 352.1 | 353 | 19. |
|                                                                                                          | 0.003 | 3064  | .13 | 348 |
|                                                                                                          | 61    |       | 791 |     |
| 1-Benzyl-3-[2-(2-furyl)vinyl]-4,5-dihydro-1H-pyrazole                                                    | -     | 252.1 | 253 | 6.0 |
|                                                                                                          | 0.003 | 2227  | .12 | 18  |
|                                                                                                          | 99    |       | 955 |     |
| Cyclohexyl[(3S)-3-(5-methyl-1H-benzimidazol-2-yl)-1-pyrrolidinyl]methanone                               | -     | 293.1 | 294 | 7.9 |
|                                                                                                          | 18.01 | 8541  | .19 | 05  |
|                                                                                                          | 435   |       | 25  |     |
| Xanthohumol                                                                                              | -     | 354.1 | 355 | 16. |

|                                                                                                                                                   |       |        |     |     |
|---------------------------------------------------------------------------------------------------------------------------------------------------|-------|--------|-----|-----|
|                                                                                                                                                   | 0.000 | 4575   | .15 | 923 |
|                                                                                                                                                   | 98    |        | 298 |     |
| Hexamethylene diisocyanate                                                                                                                        | 17.02 | 185.11 | 186 | 5.2 |
|                                                                                                                                                   | 667   | 655    | .12 | 75  |
|                                                                                                                                                   |       |        | 383 |     |
| 4-Methoxychalcone                                                                                                                                 | -     | 238.0  | 239 | 18. |
|                                                                                                                                                   | 0.000 | 992    | .10 | 814 |
|                                                                                                                                                   | 18    |        | 646 |     |
| N-Benzyl-5-methoxy-1H-indole-2-carboxamide                                                                                                        | -     | 280.11 | 279 | 7.3 |
|                                                                                                                                                   | 0.005 | 61     | .10 | 75  |
|                                                                                                                                                   | 08    |        | 883 |     |
| Naratriptan                                                                                                                                       | -     | 335.1  | 336 | 7.9 |
|                                                                                                                                                   | 0.007 | 5919   | .16 | 84  |
|                                                                                                                                                   | 55    |        | 644 |     |
| 6-[2-(Trifluoromethyl)phenyl]-1,3,5-triazine-2,4-diamine                                                                                          | 0.001 | 255.0  | 254 | 5.2 |
|                                                                                                                                                   | 37    | 7455   | .06 | 96  |
|                                                                                                                                                   |       |        | 725 |     |
| (3R,4S)-4,6,8-Trihydroxy-7-methoxy-3-methyl-3,4-dihydro-1H-isochromen-1-one                                                                       | 0.003 | 240.0  | 239 | 14. |
|                                                                                                                                                   | 37    | 6676   | .05 | 12  |
|                                                                                                                                                   |       |        | 948 |     |
| N'1-(3,4,5-Trimethoxybenzylidene)-2-(5-morpholino-2H-1,2,3,4-tetraazol-2-yl)propanohydrazide                                                      | 419.2 | 838.3  | 418 | 17. |
|                                                                                                                                                   | 073   | 9901   | .19 | 421 |
|                                                                                                                                                   |       |        | 223 |     |
| Methyl N-{(2S)-4-(isopropylcarbamoyl)-1-(phenylsulfonyl)-2-piperazinyl}carbonyl}-3-(3-pyridinyl)-D-alaninate                                      | -     | 517.1  | 518 | 10. |
|                                                                                                                                                   | 0.004 | 9486   | .20 | 356 |
|                                                                                                                                                   | 65    |        | 215 |     |
| N-Methyltryptamine                                                                                                                                | 0.000 | 174.11 | 175 | 6.4 |
|                                                                                                                                                   | 18    | 588    | .12 | 94  |
|                                                                                                                                                   |       |        | 315 |     |
| Noroxycodone                                                                                                                                      | -     | 301.1  | 302 | 5.0 |
|                                                                                                                                                   | 0.003 | 2754   | .13 | 26  |
|                                                                                                                                                   | 87    |        | 48  |     |
| N-Benzyl-5-methoxy-1H-indole-2-carboxamide                                                                                                        | -     | 280.11 | 279 | 6.3 |
|                                                                                                                                                   | 0.004 | 62     | .10 | 04  |
|                                                                                                                                                   | 98    |        | 892 |     |
| 4-[(2-{[2-(4-hydroxyphenyl)acetyl]amino}ethyl)amino]-4-oxobut-2-enoic acid                                                                        | 0.000 | 292.1  | 293 | 8.7 |
|                                                                                                                                                   | 32    | 0625   | .11 | 36  |
|                                                                                                                                                   |       |        | 331 |     |
| 9-Methoxy-12-(2-methyl-1-propen-1-yl)-1,2,3,5a,6,11,12,14a-octahydro-5H,14H-pyrrolo[1",2":4',5']pyrazino[1',2':1,6]pyrido[3,4-b]indole-5,14-dione | -     | 379.1  | 380 | 5.5 |
|                                                                                                                                                   | 0.003 | 8578   | .19 | 78  |
|                                                                                                                                                   | 81    |        | 305 |     |
| 4-(4-Ethoxyphenyl)-4-oxobutanoic acid                                                                                                             | -     | 222.0  | 221 | 15. |

|                                                                                                                                                                                                                                                                        |       |       |     |     |
|------------------------------------------------------------------------------------------------------------------------------------------------------------------------------------------------------------------------------------------------------------------------|-------|-------|-----|-----|
|                                                                                                                                                                                                                                                                        | 0.000 | 8879  | .08 | 117 |
|                                                                                                                                                                                                                                                                        | 42    |       | 151 |     |
| 2-({2-oxo-2-[(2-oxo-3-azepanyl)amino]ethyl}sulfanyl)acetic acid                                                                                                                                                                                                        | 61.12 | 321.2 | 322 | 6.2 |
|                                                                                                                                                                                                                                                                        | 229   | 0537  | .21 |     |
|                                                                                                                                                                                                                                                                        |       |       | 265 |     |
| 1,3-diazaspiro[4.5]decane-2,4-dione                                                                                                                                                                                                                                    | -     | 136.0 | 169 | 6.3 |
|                                                                                                                                                                                                                                                                        | 32.02 | 6386  | .09 | 38  |
|                                                                                                                                                                                                                                                                        | 602   |       | 735 |     |
| (5-methyl-3-isoxazolyl)[4-(5-propyl-2-pyrimidinyl)piperazino]methanone                                                                                                                                                                                                 | 0.000 | 315.1 | 316 | 6.2 |
|                                                                                                                                                                                                                                                                        | 32    | 6985  | .17 | 51  |
|                                                                                                                                                                                                                                                                        |       |       | 712 |     |
| 4-(6-{{(4R,5S,6R)-4-methoxy-6-methyl-5-{{(2S,3R,4S,5S,6R)-3,4,5-trihydroxy-6-{{(2R,3R,4S,5S,6R)-3,4,5-trihydroxy-6-(hydroxymethyl)oxan-2-yl}oxy}methyl)oxan-2-yl}oxy}oxan-2-yl}oxy}-9,13-dimethyl-17-oxotetracyclo[11.3.1.0.0]heptadecan-14-yl)-2,5-dihydrofuran-2-one | -     | 840.4 | 841 | 19. |
|                                                                                                                                                                                                                                                                        | 0.000 | 1385  | .42 | 514 |
|                                                                                                                                                                                                                                                                        | 5     |       | 084 |     |
| 4-(Dimethylamino)-N-{{(2R,4S,5S)-5-(1-piperidinylmethyl)-1-azabicyclo[2.2.2]oct-2-yl}methyl}benzamide                                                                                                                                                                  | -     | 344.2 | 367 | 22. |
|                                                                                                                                                                                                                                                                        | 39.99 | 9241  | .28 | 492 |
|                                                                                                                                                                                                                                                                        | 65    |       | 162 |     |
| Lenacil                                                                                                                                                                                                                                                                | 0.000 | 234.1 | 235 | 8.2 |
|                                                                                                                                                                                                                                                                        | 06    | 3689  | .14 | 01  |
|                                                                                                                                                                                                                                                                        |       |       | 417 |     |
| (3β,5ξ,9ξ)-28-Hydroxy-28-oxoolean-12-en-3-yl 3-O-β-D-galactopyranosyl-α-D-glucopyranosiduronic acid                                                                                                                                                                    | 794.4 | 1588. | 795 | 17. |
|                                                                                                                                                                                                                                                                        | 4314  | 8884  | .45 | 991 |
|                                                                                                                                                                                                                                                                        |       |       | 148 |     |
| {{(1R,2R)-2-[(2Z)-5-(Hexopyranosyloxy)-2-penten-1-yl]-3-oxocyclopentyl}acetic acid                                                                                                                                                                                     | 0.000 | 388.1 | 387 | 10. |
|                                                                                                                                                                                                                                                                        | 51    | 7385  | .16 | 403 |
|                                                                                                                                                                                                                                                                        |       |       | 66  |     |
| 2-(2,4-dichlorophenyl)-4,4,7,9-tetramethyl-4,5-dihydro-3H-naphtho[1,2-d]imidazole                                                                                                                                                                                      | 0.004 | 370.1 | 369 | 16. |
|                                                                                                                                                                                                                                                                        | 73    | 0509  | .09 | 104 |
|                                                                                                                                                                                                                                                                        |       |       | 781 |     |
| α-Linolenoyl ethanolamide                                                                                                                                                                                                                                              | -     | 321.2 | 322 | 20. |
|                                                                                                                                                                                                                                                                        | 0.000 | 665   | .27 | 324 |
|                                                                                                                                                                                                                                                                        | 28    |       | 377 |     |
| 7,7-dimethyl-3-spiro(4,4,-dimethyl-2,6-dioxocyclohexyl)-1,2,3,4,5,6,7,8-octahydro-5-quinolinone                                                                                                                                                                        | -     | 303.1 | 304 | 17. |
|                                                                                                                                                                                                                                                                        | 0.000 | 8323  | .19 | 811 |
|                                                                                                                                                                                                                                                                        | 22    |       | 049 |     |
| (1S,3S)-N-Isopropyl-2,2-dimethyl-3-{{5-(phenoxyethyl)-1,2-oxazol-3-                                                                                                                                                                                                    | -     | 328.2 | 329 | 10. |
|                                                                                                                                                                                                                                                                        | 0.004 | 1091  | .21 | 346 |

|                                                                                                       |        |       |     |     |
|-------------------------------------------------------------------------------------------------------|--------|-------|-----|-----|
| yl]methyl} cyclobutanamine                                                                            | 17     |       | 814 |     |
| 3-[2-(β-D-Glucopyranosyloxy)-4-methoxyphenyl]propanoic acid                                           | 0.000  | 358.1 | 357 | 9.6 |
|                                                                                                       | 18     | 2656  | .11 | 22  |
|                                                                                                       |        |       | 948 |     |
| YLK                                                                                                   | -      | 403.2 | 445 | 12. |
|                                                                                                       | 19.04  | 1054  | .24 | 39  |
|                                                                                                       | 238    |       | 438 |     |
| Nomifensine                                                                                           | -      | 238.1 | 239 | 7.0 |
|                                                                                                       | 0.003  | 4301  | .15 | 54  |
|                                                                                                       | 98     |       | 028 |     |
| 1,3-dimethyl 2,4-bis(4-hydroxyphenyl)cyclobutane-1,3-dicarboxylate                                    | -      | 356.1 | 357 | 16. |
|                                                                                                       | 0.000  | 2571  | .13 | 271 |
|                                                                                                       | 27     |       | 272 |     |
| 3-Methoxy prostaglandin F1α                                                                           | -      | 368.2 | 369 | 16. |
|                                                                                                       | 18.011 | 5569  | .26 | 032 |
|                                                                                                       | 15     |       | 297 |     |
| (2E,4E)-N-(1,3-dihydroxy-3-methylpentan-2-yl)-2-methylhexa-2,4-dienamide                              | -      | 241.1 | 242 | 11. |
|                                                                                                       | 0.000  | 6738  | .17 | 591 |
|                                                                                                       | 42     |       | 465 |     |
| 2-[2-(2-furyl)vinyl]-4H-3,1-benzoxazin-4-one                                                          | -      | 239.0 | 240 | 14. |
|                                                                                                       | 0.000  | 5815  | .06 | 274 |
|                                                                                                       | 09     |       | 537 |     |
| Thymine                                                                                               | 0.000  | 126.0 | 127 | 6.5 |
|                                                                                                       | 22     | 4315  | .05 | 53  |
|                                                                                                       |        |       | 042 |     |
| (1E)-5-hydroxy-1,7-diphenylhept-1-en-3-one                                                            | 21.98  | 302.1 | 303 | 8.3 |
|                                                                                                       | 045    | 2678  | .13 | 11  |
|                                                                                                       |        |       | 403 |     |
| 3-Methylbenzophenone                                                                                  | -      | 196.0 | 197 | 15. |
|                                                                                                       | 0.000  | 8861  | .09 | 137 |
|                                                                                                       | 21     |       | 589 |     |
| 1,2,3,4-Tetrahydroisoquinoline-1-acetic acid                                                          | 0.000  | 191.0 | 192 | 6.3 |
|                                                                                                       | 19     | 9482  | .10 | 41  |
|                                                                                                       |        |       | 21  |     |
| N-(1-methyl-1H-indazol-3-yl)-2-[3-(trifluoromethyl)-1H-pyrazol-1-yl]acetamide                         | 0.001  | 323.1 | 322 | 10. |
|                                                                                                       | 45     | 0084  | .09 | 134 |
|                                                                                                       |        |       | 357 |     |
| (5S,6S)-5-hydroxy-4-methoxy-6-(2-phenylethyl)-5,6-dihydro-2H-pyran-2-one                              | 21.98  | 270.0 | 271 | 14. |
|                                                                                                       | 384    | 8869  | .09 | 978 |
|                                                                                                       |        |       | 592 |     |
| ethyl 4-(1,3-dimethyl-2,6-dioxo-1,2,3,6-tetrahydropyrimidin-4-yl)tetrahydropyrazine-1(2H)-carboxylate | -      | 279.1 | 297 | 6.1 |
|                                                                                                       | 17.02  | 2214  | .15 | 42  |
|                                                                                                       | 631    |       | 594 |     |
| N2-[(3R,4S)-3-{[5-(4-methoxyphenyl)-                                                                  | 37.95  | 438.1 | 439 | 21. |

|                                                                                |       |        |     |     |
|--------------------------------------------------------------------------------|-------|--------|-----|-----|
| 1,2-oxazol-3-yl]methyl}-4-piperidinyl]acetyl}-N2-methylglycinamide             | 62    | 6726   | .17 | 92  |
| trans-Cinnamaldehyde                                                           | 0.000 | 132.0  | 133 | 11. |
|                                                                                | 13    | 5765   | .06 | 137 |
|                                                                                |       |        | 493 |     |
| N-Methyl-2-AI                                                                  | 0.000 | 147.1  | 148 | 6.4 |
|                                                                                | 14    | 0494   | .11 | 94  |
|                                                                                |       |        | 221 |     |
| 5-(tert-butyl)-2-methyl-N-(4-nitrophenyl)-3-furamide                           | 0.000 | 302.1  | 303 | 8.0 |
|                                                                                | 1     | 2676   | .13 | 82  |
|                                                                                |       |        | 403 |     |
| ABL 127                                                                        | 21.97 | 354.1  | 355 | 17. |
|                                                                                | 238   | 0961   | .11 | 053 |
|                                                                                |       |        | 688 |     |
| 4-benzyl-N-(4-fluorophenyl)tetrahydro-1(2H)-pyrazinecarboxamide                | 0.004 | 313.1  | 312 | 10. |
|                                                                                | 77    | 6381   | .15 | 559 |
|                                                                                |       |        | 695 |     |
| benzaldehyde                                                                   |       |        |     |     |
| 1-(2,4-dinitrophenyl)hydrazone                                                 | -     | 286.0  | 285 | 9.0 |
|                                                                                | 0.000 | 6925   | .06 | 25  |
|                                                                                | 95    |        | 198 |     |
| Mirtazapine-d3                                                                 | 0.001 | 268.1  | 269 | 14. |
|                                                                                | 85    | 7858   | .18 | 523 |
|                                                                                |       |        | 585 |     |
| 3-(2-morpholinophenyl)-2-(phenylsulfonyl)acrylonitrile                         | 0.006 | 354.1  | 355 | 17. |
|                                                                                | 03    | 0984   | .11 | 519 |
|                                                                                |       |        | 694 |     |
| 1,3-Divinyl-2-imidazolidinone                                                  | 0.000 | 138.0  | 139 | 7.5 |
|                                                                                | 07    | 7939   | .08 | 82  |
|                                                                                |       |        | 662 |     |
| 1-(2-furyl)pentane-1,4-dione                                                   | 21.98 | 188.0  | 189 | 17. |
|                                                                                | 431   | 473    | .05 | 327 |
|                                                                                |       |        | 458 |     |
| VNH                                                                            | 368.1 | 736.3  | 369 | 8.9 |
|                                                                                | 9437  | 7519   | .19 | 57  |
|                                                                                |       |        | 482 |     |
| 1-O-[(3β,5ξ,9ξ,18ξ)-3,19,24-Trihydroxy-24,28-dioxours-12-en-28-yl]hexopyranose | 0.000 | 664.3  | 663 | 20. |
|                                                                                | 26    | 8252   | .37 | 355 |
|                                                                                |       |        | 535 |     |
| 5-([1,1'-biphenyl]-2-ylamino)-5-oxopentanoic acid                              | -     | 283.11 | 284 | 7.1 |
|                                                                                | 0.003 | 705    | .12 | 23  |
|                                                                                | 79    |        | 433 |     |
| 3-(1-hydroxyethyl)-2,3,6,7,8,8a-hexahydropyrrolo[1,2-a]pyrazine-1,4-           | 0.000 | 198.1  | 199 | 6.3 |
|                                                                                | 21    | 0065   | .10 | 34  |

|                                                                                                                             |       |       |      |     |
|-----------------------------------------------------------------------------------------------------------------------------|-------|-------|------|-----|
| dione                                                                                                                       |       |       |      | 793 |
| N1-bicyclo[2.2.1]hept-5-en-2-yl-2-cyclopentylidenedihydrazine-1-carbothioamide                                              | 0.006 | 249.1 | 250  | 7.3 |
|                                                                                                                             | 39    | 3635  | .14  | 54  |
|                                                                                                                             |       |       | 363  |     |
| N-((2R,4S,5R)-5-[1-Methyl-3-(2-naphthyl)-1H-pyrazol-5-yl]-1-azabicyclo[2.2.2]oct-2-yl)methyl-1,3-benzodioxole-5-carboxamide | 0.004 | 494.2 | 539  | 12. |
|                                                                                                                             | 88    | 3667  | .23  | 579 |
|                                                                                                                             |       |       | 499  |     |
| 1,2,3,4-Tetrahydroisoquinoline-1-acetic acid                                                                                | -     | 191.0 | 192  | 12. |
|                                                                                                                             | 0.000 | 9445  | .10  | 195 |
|                                                                                                                             |       |       | 173  |     |
|                                                                                                                             |       |       | 17   |     |
| N,N-Dimethylpentylone                                                                                                       | -     | 249.1 | 250  | 7.7 |
|                                                                                                                             | 0.000 | 3645  | .14  | 53  |
|                                                                                                                             |       |       | 05   |     |
|                                                                                                                             |       |       | 372  |     |
| Propachlor ESA                                                                                                              | 18.00 | 275.0 | 276  | 14. |
|                                                                                                                             | 729   | 7947  | .08  | 284 |
|                                                                                                                             |       |       | 673  |     |
| Amobarbital                                                                                                                 | -     | 226.1 | 227  | 9.7 |
|                                                                                                                             | 0.000 | 3169  | .13  | 43  |
|                                                                                                                             |       |       | 06   |     |
|                                                                                                                             |       |       | 896  |     |
| 4-(3-Hydroxybutyl)phenyl $\beta$ -D-glucopyranoside                                                                         | 0.000 | 328.1 | 373  | 10. |
|                                                                                                                             | 32    | 5253  | .15  | 341 |
|                                                                                                                             |       |       | 07   |     |
| 3-Methylbenzophenone                                                                                                        | 0.000 | 196.0 | 197  | 17. |
|                                                                                                                             | 04    | 8885  | .09  | 893 |
|                                                                                                                             |       |       | 613  |     |
| N-(2-Morpholinoethyl)-4-(1H-pyrazol-1-yl)benzamide                                                                          | 18.00 | 318.1 | 299  | 14. |
|                                                                                                                             | 949   | 6811  | .15  | 052 |
|                                                                                                                             |       |       | 027  |     |
| 2,7,7-trimethyl-5,6,7,8-tetrahydroquinolin-5-one oxime                                                                      | 0.000 | 204.1 | 205  | 8.8 |
|                                                                                                                             | 23    | 265   | .13  | 56  |
|                                                                                                                             |       |       | 377  |     |
| PRE-084                                                                                                                     | -     | 317.1 | 318  | 17. |
|                                                                                                                             | 0.000 | 9889  | .20  | 627 |
|                                                                                                                             |       |       | 21   |     |
|                                                                                                                             |       |       | 615  |     |
| 5-Isoxazol-5-yl-N-[4-(4-methylpiperazin-1-yl)benzyl]thiophene-2-sulfonamide                                                 | -     | 186.0 | 417  | 9.8 |
|                                                                                                                             | 232.0 | 5305  | .10  | 92  |
|                                                                                                                             |       |       | 6028 |     |
|                                                                                                                             |       |       | 431  |     |
| N-[(3S,3aS,8S,9S,9aS,9bS)-3,5a,9-Trimethyl-2-oxododecahydronaphtho[1,2-b]furan-8-yl]acetamide                               | 21.98 | 315.1 | 316  | 18. |
|                                                                                                                             | 402   | 8311  | .19  | 137 |
|                                                                                                                             |       |       | 043  |     |
| 1-adamantyl(piperidino)methanone                                                                                            | 21.98 | 269.1 | 270  | 5.1 |
|                                                                                                                             | 032   | 7394  | .18  | 72  |

|                                                                                                                                                                               |                    |               |            |            |
|-------------------------------------------------------------------------------------------------------------------------------------------------------------------------------|--------------------|---------------|------------|------------|
|                                                                                                                                                                               |                    |               | 121        |            |
| 3,3-dimethyl-2-morpholino-2,3-dihydrobenzo[b]furan-5-ol                                                                                                                       | 0.000<br>06        | 249.1<br>3655 | 250<br>.14 | 9.3<br>12  |
|                                                                                                                                                                               |                    |               | 383        |            |
| Theophylline                                                                                                                                                                  | -<br>0.002<br>05   | 180.0<br>6267 | 179<br>.05 | 1.3<br>43  |
|                                                                                                                                                                               |                    |               | 519        |            |
| N-(cyclopropylmethyl)-2-[[1,2-dimethyl-1H-imidazol-4-yl)sulfonyl]amino}benzamide                                                                                              | 0.002<br>43        | 348.1<br>2804 | 349<br>.13 | 1.8<br>75  |
|                                                                                                                                                                               |                    |               | 531        |            |
| 3,3-dimethyl-2-morpholino-2,3-dihydrobenzo[b]furan-5-ol                                                                                                                       | 0.000<br>12        | 249.1<br>3661 | 250<br>.14 | 8.3<br>79  |
|                                                                                                                                                                               |                    |               | 389        |            |
| Prostaglandin D2                                                                                                                                                              | -<br>10.03<br>489  | 342.1<br>9009 | 343<br>.19 | 7.3<br>16  |
|                                                                                                                                                                               |                    |               | 73         |            |
| 2-(4-chlorophenyl)-5-(4-phenylbuta-1,3-dienyl)-2H-1,2,3,4-tetraazole                                                                                                          | -<br>0.003<br>63   | 308.0<br>7925 | 309<br>.08 | 15.<br>066 |
|                                                                                                                                                                               |                    |               | 643        |            |
| 7-[[4,5-dihydroxy-6-(hydroxymethyl)-3-[[2S,3R,4R,5R,6S)-3,4,5-trihydroxy-6-methyloxan-2-yl]oxy}oxan-2-yl]oxy}-5-hydroxy-2-(4-hydroxyphenyl)-3,4-dihydro-2H-1-benzopyran-4-one | -<br>290.0<br>8988 | 290.0<br>8933 | 579<br>.17 | 11.<br>97  |
|                                                                                                                                                                               |                    |               | 133        |            |
| N2-[[3R,4S)-3-[[5-(4-methoxyphenyl)-1,2-oxazol-3-yl]methyl]-4-piperidinyl]acetyl}-N2-methylglycinamide                                                                        | 55.96<br>722       | 456.1<br>7828 | 439<br>.17 | 17.<br>976 |
|                                                                                                                                                                               |                    |               | 499        |            |
| Trilostane                                                                                                                                                                    | 18.01<br>017       | 347.2<br>0926 | 330<br>.20 | 17.<br>411 |
|                                                                                                                                                                               |                    |               | 596        |            |
| N1-(3-amino-4-chlorophenyl)-2-[2,4-di(tert-pentyl)phenoxy]acetamide                                                                                                           | 0.004<br>28        | 416.2<br>2734 | 415<br>.22 | 9.5<br>13  |
|                                                                                                                                                                               |                    |               | 006        |            |
| Ethyl 2-{3-[(4-chloro-2-nitrobenzoyl)amino]-4-methylphenoxy}propanoate                                                                                                        | 0.000<br>29        | 406.0<br>9346 | 405<br>.08 | 15.<br>756 |
|                                                                                                                                                                               |                    |               | 618        |            |
| 2-(1-benzothiophen-3-ylmethylene)-3,4-dihydronaphthalen-1(2H)-one                                                                                                             | 0.002<br>1         | 290.0<br>7863 | 291<br>.08 | 13.<br>74  |
|                                                                                                                                                                               |                    |               | 591        |            |
| 2-(hydroxymethyl)-6-[(E)-4-(1,2,4-trihydroxy-2,6,6-trimethylcyclohexyl)but-3-en-2-yl]oxyoxane-3,4,5-triol                                                                     | 46.00<br>602       | 452.2<br>263  | 451<br>.21 | 9.9<br>26  |
|                                                                                                                                                                               |                    |               | 902        |            |

|                                                                                                                                    |                   |               |                   |            |
|------------------------------------------------------------------------------------------------------------------------------------|-------------------|---------------|-------------------|------------|
| 1-{{(2R,3S,4R,5S)-3,4-Dihydroxy-5-{{2-[4-(2-methoxyphenyl)-1-piperazinyl]-2-oxoethyl}tetrahydro-2-furanyl)methyl}}-3-isopropylurea | 46.00<br>493      | 496.2<br>5276 | 495<br>.24        | 8.7<br>58  |
| Ipratropium                                                                                                                        | -<br>41.02<br>691 | 290.1<br>8784 | 332<br>.22<br>156 | 18.<br>894 |
| Difenoxurone                                                                                                                       | 0.000<br>15       | 286.1<br>3189 | 287<br>.13        | 8.8<br>35  |
| 2-(2,4-dichlorophenyl)-4,4,7,9-tetramethyl-4,5-dihydro-3H-naphtho[1,2-d]imidazole                                                  | 0.004<br>52       | 370.1<br>0488 | 369<br>.09        | 15.<br>159 |
| Ethyl-β-D-glucuronide                                                                                                              | -<br>0.000<br>41  | 222.0<br>7355 | 221<br>.06<br>613 | 1.3<br>98  |
| Prostaglandin D2                                                                                                                   | 35.97<br>195      | 388.1<br>9692 | 501<br>.18        | 6.0<br>25  |
| 1,5-Ditetrahydro-1H-pyrrol-1-ylpentane-1,5-dione                                                                                   | 21.98<br>436      | 260.1<br>5249 | 261<br>.15        | 14.<br>207 |
| 3-Nitro-2,6-dipiperidinopyridine                                                                                                   | 0.000<br>27       | 290.1<br>7455 | 291<br>.18        | 5.6<br>99  |
| ethyl 4-amino-2-(methylsulfanyl)-1,3-thiazole-5-carboxylate                                                                        | 0.000<br>72       | 218.0<br>1909 | 219<br>.02        | 1.3<br>34  |
| (5-Amino[1,2,3]triazolo[1,5-a]quinazolin-3-yl)(morpholino)methanone                                                                | -<br>46.00<br>653 | 252.11<br>129 | 297<br>.10<br>95  | 7.8<br>69  |
| Tryptoline                                                                                                                         | 0.000<br>14       | 172.1<br>0019 | 173<br>.10        | 7.6<br>57  |
| 9-(2,2-diethoxyethyl)-9H-carbazole                                                                                                 | -<br>32.03<br>097 | 251.1<br>2626 | 252<br>.13<br>313 | 7.2<br>37  |
| 3-Nitro-2,6-dipiperidinopyridine                                                                                                   | 0.000<br>03       | 290.1<br>743  | 291<br>.18        | 4.9<br>09  |
| Sibiricose A3                                                                                                                      | -<br>60.02<br>081 | 402.11<br>653 | 461<br>.13<br>037 | 7.9<br>15  |
| 5-Fluoro PY-PINACA                                                                                                                 | -                 | 303.1         | 304               | 6.4        |



|                                                                                                     |       |       |     |     |
|-----------------------------------------------------------------------------------------------------|-------|-------|-----|-----|
|                                                                                                     | 0.004 | 6979  | .17 | 85  |
|                                                                                                     | 9     |       | 706 |     |
| 5-Fluoro PY-PINACA                                                                                  | 0.004 | 303.1 | 304 | 6.7 |
|                                                                                                     | 95    | 7964  | .18 | 23  |
|                                                                                                     |       |       | 692 |     |
| 15(R)-Lipoxin A4                                                                                    | 35.97 | 388.1 | 447 | 7.7 |
|                                                                                                     | 107   | 9604  | .20 | 66  |
|                                                                                                     |       |       | 99  |     |
| Methyl (6S)-5-(4-fluorobenzoyl)-3-methyl-4,5,6,7-tetrahydro-3H-imidazo[4,5-c]pyridine-6-carboxylate | 0.004 | 317.1 | 318 | 5.2 |
|                                                                                                     | 69    | 2226  | .12 | 71  |
|                                                                                                     |       |       | 952 |     |
| 6-methyl-2-(4-methylphenyl)pyrimidin-4-yl 4-methylbenzene-1-sulfonate                               | 0.006 | 354.1 | 355 | 17. |
|                                                                                                     | 13    | 0994  | .11 | 259 |
|                                                                                                     |       |       | 722 |     |
| Norepinephrine                                                                                      | -     | 123.0 | 168 | 7.2 |
|                                                                                                     | 46.00 | 6754  | .06 | 2   |
|                                                                                                     | 635   |       | 575 |     |
| (6E)-7-(2H-1,3-benzodioxol-5-yl)-1-(piperidin-1-yl)hept-6-en-1-one                                  | -     | 315.1 | 316 | 7.5 |
|                                                                                                     | 0.004 | 7921  | .18 | 68  |
|                                                                                                     | 23    |       | 649 |     |
| Cytidine                                                                                            | 0.003 | 243.0 | 244 | 9.8 |
|                                                                                                     | 87    | 8939  | .09 | 18  |
|                                                                                                     |       |       | 666 |     |
| N-(1,3-benzodioxol-5-yl)-7-chloroquinolin-4-amine                                                   | -     | 298.0 | 297 | 15. |
|                                                                                                     | 0.003 | 4771  | .04 | 807 |
|                                                                                                     | 2     |       | 068 |     |
| N-benzyl-3-(4-chlorophenyl)-4,5-dihydro-5-isoxazolecarboxamide                                      | -     | 314.0 | 315 | 18. |
|                                                                                                     | 0.003 | 7861  | .08 | 249 |
|                                                                                                     | 59    |       | 591 |     |
| Pentylone                                                                                           | 0.000 | 235.1 | 236 | 6.8 |
|                                                                                                     | 15    | 2099  | .12 | 76  |
|                                                                                                     |       |       | 827 |     |
| Trilostane                                                                                          | -     | 329.1 | 330 | 17. |
|                                                                                                     | 0.000 | 9894  | .20 | 853 |
|                                                                                                     | 15    |       | 621 |     |
| 2-[1-(2-Oxo-2-{[3-(trifluoromethyl)benzyl]amino}ethyl)cyclohexyl]acetic acid                        | -     | 357.1 | 356 | 7.6 |
|                                                                                                     | 0.001 | 5364  | .14 | 25  |
|                                                                                                     | 54    |       | 636 |     |
| Furanyl norfentanyl                                                                                 | -     | 270.1 | 271 | 4.3 |
|                                                                                                     | 0.004 | 328   | .14 | 99  |
|                                                                                                     | 03    |       | 008 |     |
| 4-(4-Hydroxyphenyl)-2-butanyl 6-O-[(4ξ)-α-L-threo-pentofuranosyl]-β-D-glucopyranoside               | 0.000 | 460.1 | 505 | 11. |
|                                                                                                     | 75    | 9521  | .19 | 269 |
|                                                                                                     |       |       | 342 |     |

|                                                                                    |       |        |     |     |
|------------------------------------------------------------------------------------|-------|--------|-----|-----|
| 2-(6,7-Dimethoxy-3,4-dihydroisoquinolin-1-yl)aniline                               | -     | 282.1  | 283 | 4.6 |
|                                                                                    | 0.004 | 3272   | .13 | 92  |
|                                                                                    | 11    |        | 998 |     |
| CMPF                                                                               | -     | 240.0  | 239 | 10. |
|                                                                                    | 0.000 | 9965   | .09 | 904 |
|                                                                                    | 12    |        | 238 |     |
| 5,7-Dihydroxy-2-(3-hydroxy-4-methoxyphenyl)chroman-4-one                           | 0.000 | 302.0  | 301 | 15. |
|                                                                                    | 11    | 7915   | .07 | 147 |
|                                                                                    |       |        | 187 |     |
| Acetanilide                                                                        | 18.01 | 153.0  | 154 | 11. |
|                                                                                    | 064   | 7906   | .08 | 298 |
|                                                                                    |       |        | 629 |     |
| morpholine-4-carboximidamide hydrobromide                                          | 0.000 | 129.0  | 130 | 1.4 |
|                                                                                    | 1     | 9031   | .09 | 91  |
|                                                                                    |       |        | 756 |     |
| 2-oxopiperidine-3-carbohydrazide                                                   | 0.000 | 157.0  | 158 | 2.0 |
|                                                                                    | 03    | 8516   | .09 | 32  |
|                                                                                    |       |        | 244 |     |
| Dimethachlor OXA                                                                   | 0.000 | 251.11 | 252 | 6.4 |
|                                                                                    | 18    | 593    | .12 | 86  |
|                                                                                    |       |        | 323 |     |
| 1,3,4,10-Tetrahydro-9(2H)-acridinone                                               | 0.000 | 199.0  | 200 | 7.9 |
|                                                                                    | 22    | 9993   | .10 | 45  |
|                                                                                    |       |        | 721 |     |
| Alprenolol                                                                         | 0.000 | 249.1  | 267 | 8.9 |
|                                                                                    | 13    | 7301   | .20 | 82  |
|                                                                                    |       |        | 679 |     |
| nicotinaldehyde N-(3-pyridinylmethylene)hydrazone                                  | -     | 210.0  | 211 | 20. |
|                                                                                    | 0.001 | 8906   | .09 | 926 |
|                                                                                    | 49    |        | 633 |     |
| 3-(2,4-dihydroxyphenyl)-7-hydroxy-6,8-bis(3-methylbut-2-en-1-yl)-4H-chromen-4-one  | -     | 406.1  | 407 | 19. |
|                                                                                    | 0.000 | 7778   | .18 | 869 |
|                                                                                    | 24    |        | 5   |     |
| N2-3-2-3-4,5-1,2-oxazol-3-ylmethyl-4-piperidinylacetyl-N2-methylglycinamide        | 37.95 | 438.1  | 439 | 18. |
|                                                                                    | 666   | 6771   | .17 | 624 |
|                                                                                    |       |        | 499 |     |
| (2E)-3-(2-3-4,5-trihydroxy-6-(hydroxymethyl)oxan-2-yl]oxy}phenyl)prop-2-enoic acid | 17.02 | 343.1  | 344 | 3.3 |
|                                                                                    | 666   | 2683   | .13 | 23  |
|                                                                                    |       |        | 409 |     |
| Isorhapontigenin                                                                   | -     | 258.0  | 259 | 13. |
|                                                                                    | 0.000 | 8908   | .09 | 157 |
|                                                                                    | 13    |        | 637 |     |
| Zolpidem-d6                                                                        | -     | 272.1  | 314 | 19. |

|                                                                                                                                                                                                   |       |       |     |     |
|---------------------------------------------------------------------------------------------------------------------------------------------------------------------------------------------------|-------|-------|-----|-----|
|                                                                                                                                                                                                   | 41.02 | 7753  | .21 | 941 |
|                                                                                                                                                                                                   | 859   |       | 13  |     |
| 2-oxopiperidine-3-carbohydrazide                                                                                                                                                                  | -     | 125.0 | 158 | 1.5 |
|                                                                                                                                                                                                   | 32.02 | 5884  | .09 | 71  |
|                                                                                                                                                                                                   | 629   |       | 238 |     |
| 1,3-Diphenylacetone                                                                                                                                                                               | -     | 210.1 | 211 | 15. |
|                                                                                                                                                                                                   | 0.000 | 042   | .11 | 135 |
|                                                                                                                                                                                                   | 26    |       | 148 |     |
| 2-[(Dimethylamino)methylidene]indan-1-one                                                                                                                                                         | 0.000 | 187.0 | 188 | 7.7 |
|                                                                                                                                                                                                   | 1     | 9981  | .10 | 59  |
|                                                                                                                                                                                                   |       |       | 709 |     |
| Cyheptamide                                                                                                                                                                                       | 18.00 | 255.1 | 238 | 7.2 |
|                                                                                                                                                                                                   | 647   | 2183  | .11 | 49  |
|                                                                                                                                                                                                   |       |       | 853 |     |
| 1-hydroxy-1-(4-methoxyphenyl)propan-2-yl 4-methoxybenzoate                                                                                                                                        | -     | 306.0 | 339 | 16. |
|                                                                                                                                                                                                   | 10.04 | 8887  | .12 | 097 |
|                                                                                                                                                                                                   | 221   |       | 238 |     |
| 1,5,8-Trihydroxy-9-oxo-9H-xanthen-3-yl beta-D-glucopyranoside                                                                                                                                     | -     | 422.0 | 421 | 1.7 |
|                                                                                                                                                                                                   | 0.001 | 8305  | .07 | 62  |
|                                                                                                                                                                                                   | 86    |       | 578 |     |
| Terfenadine                                                                                                                                                                                       | -     | 471.3 | 472 | 23. |
|                                                                                                                                                                                                   | 0.000 | 134   | .32 | 299 |
|                                                                                                                                                                                                   | 33    |       | 065 |     |
| Tetracaine                                                                                                                                                                                        | 0.000 | 264.1 | 265 | 7.0 |
|                                                                                                                                                                                                   | 14    | 8392  | .19 | 41  |
|                                                                                                                                                                                                   |       |       | 119 |     |
| 4-Methylumbelliferone hydrate                                                                                                                                                                     | -     | 176.0 | 177 | 20. |
|                                                                                                                                                                                                   | 0.000 | 4732  | .05 | 065 |
|                                                                                                                                                                                                   | 02    |       | 46  |     |
| 4-(dimethylamino)-1,1-diphenylbut-3-en-2-one                                                                                                                                                      | 0.005 | 265.1 | 266 | 1.2 |
|                                                                                                                                                                                                   | 79    | 5245  | .15 | 51  |
|                                                                                                                                                                                                   |       |       | 973 |     |
| Ornithine                                                                                                                                                                                         | -     | 132.0 | 131 | 1.2 |
|                                                                                                                                                                                                   | 0.001 | 8865  | .08 | 14  |
|                                                                                                                                                                                                   | 23    |       | 138 |     |
| [(2R,3S,4S,5R,6R)-6-{4-[(4,5-dihydroxy-6-[(4-hydroxy-2-methylidenebutanoyl)oxy]methyl]oxan-3-yl)oxy]-3-methylidene-4-oxobutoxy}-3,4,5-trihydroxyoxan-2-yl]methyl 4-hydroxy-2-methylidenebutanoate | 45.99 | 666.2 | 665 | 5.1 |
|                                                                                                                                                                                                   | 105   | 2268  | .21 | 93  |
|                                                                                                                                                                                                   |       |       | 539 |     |
| [(3R,4S)-3-(3,4-Dihydro-1-isoquinolinylmethyl)-1-(3-phenylpropanoyl)-4-piperidinyl]acetic                                                                                                         | -     | 418.2 | 419 | 18. |
|                                                                                                                                                                                                   | 0.000 | 2536  | .23 | 537 |
|                                                                                                                                                                                                   | 28    |       | 264 |     |

|                                                                                                                                                                                                |                     |       |       |     |     |
|------------------------------------------------------------------------------------------------------------------------------------------------------------------------------------------------|---------------------|-------|-------|-----|-----|
| acid                                                                                                                                                                                           |                     |       |       |     |     |
| (+/-)-UR-144                                                                                                                                                                                   | N-(4-Hydroxypentyl) | -     | 327.2 | 328 | 20. |
| metabolite                                                                                                                                                                                     |                     | 0.000 | 1962  | .22 | 187 |
|                                                                                                                                                                                                |                     | 2     |       | 69  |     |
| 7-{[4,5-dihydroxy-6-(hydroxymethyl)-3-<br>{[(2S,3R,4R,5R,6S)-3,4,5-trihydroxy-6-<br>methyloxan-2-yl]oxy}oxan-2-yl]oxy}-5-<br>hydroxy-2-(4-hydroxyphenyl)-3,4-<br>dihydro-2H-1-benzopyran-4-one |                     | 0.000 | 580.1 | 579 | 11. |
|                                                                                                                                                                                                |                     | 15    | 7936  | .17 | 321 |
|                                                                                                                                                                                                |                     |       |       | 218 |     |
| Harmine                                                                                                                                                                                        |                     | 0.000 | 212.0 | 213 | 9.5 |
|                                                                                                                                                                                                |                     | 22    | 9518  | .10 | 27  |
|                                                                                                                                                                                                |                     |       |       | 246 |     |
| 1-[4-(trifluoromethoxy)phenyl]-4,5-<br>dihydro-1H-1,2,3,4-tetraazole-5-thione                                                                                                                  |                     | 0.001 | 262.0 | 261 | 9.3 |
|                                                                                                                                                                                                |                     | 09    | 1471  | .00 | 81  |
|                                                                                                                                                                                                |                     |       |       | 742 |     |
| ethyl 4,5-dimethyl-2-[(quinolin-6-<br>ylcarbonyl)amino]thiophene-3-<br>carboxylate                                                                                                             |                     | 18.01 | 372.1 | 353 | 16. |
|                                                                                                                                                                                                |                     | 687   | 2069  | .10 | 956 |
|                                                                                                                                                                                                |                     |       |       | 284 |     |
| Rifampicin                                                                                                                                                                                     |                     | -     | 822.4 | 823 | 21. |
|                                                                                                                                                                                                |                     | 0.001 | 0328  | .40 | 064 |
|                                                                                                                                                                                                |                     | 84    |       | 991 |     |
| 3,8,9-trihydroxy-10-propyl-3,4,5,8,9,10-<br>hexahydro-2H-oxecin-2-one                                                                                                                          |                     | -     | 244.1 | 243 | 13. |
|                                                                                                                                                                                                |                     | 0.000 | 3101  | .12 | 109 |
|                                                                                                                                                                                                |                     | 07    |       | 381 |     |
| N-[1-(2-chloro-6-fluorobenzyl)-4-<br>piperidiny]-1-ethyl-3-methyl-1H-<br>pyrazole-5-carboxamide                                                                                                |                     | 0.003 | 378.1 | 377 | 6.5 |
|                                                                                                                                                                                                |                     | 06    | 6533  | .15 | 8   |
|                                                                                                                                                                                                |                     |       |       | 805 |     |
| (±)5(6)-DiHET                                                                                                                                                                                  |                     | 41.96 | 380.2 | 381 | 22. |
|                                                                                                                                                                                                |                     | 818   | 1389  | .22 | 338 |
|                                                                                                                                                                                                |                     |       |       | 119 |     |
| ethyl 4,5-dimethyl-2-[(quinolin-6-<br>ylcarbonyl)amino]thiophene-3-<br>carboxylate                                                                                                             |                     | -     | 316.1 | 353 | 17. |
|                                                                                                                                                                                                |                     | 37.94 | 5442  | .10 | 265 |
|                                                                                                                                                                                                |                     | 94    |       | 303 |     |
| 4-Methylumbelliferone hydrate                                                                                                                                                                  |                     | -     | 176.0 | 177 | 13. |
|                                                                                                                                                                                                |                     | 0.000 | 4726  | .05 | 752 |
|                                                                                                                                                                                                |                     | 08    |       | 453 |     |
| Tetranor-12R-HETE                                                                                                                                                                              |                     | -     | 216.1 | 217 | 17. |
|                                                                                                                                                                                                |                     | 50.03 | 5138  | .15 | 593 |
|                                                                                                                                                                                                |                     | 682   |       | 866 |     |
| NKK                                                                                                                                                                                            |                     | 0.003 | 388.2 | 389 | 13. |
|                                                                                                                                                                                                |                     | 15    | 4657  | .25 | 563 |
|                                                                                                                                                                                                |                     |       |       | 381 |     |
| Methyl (1S,4aR,6S,7R,7aS)-1-(β-D-<br>glucopyranosyloxy)-4a,7-dihydroxy-6-                                                                                                                      |                     | 0.000 | 568.1 | 567 | 11. |
|                                                                                                                                                                                                |                     | 59    | 7979  | .17 | 154 |

|                                                                                                              |        |        |     |     |
|--------------------------------------------------------------------------------------------------------------|--------|--------|-----|-----|
| {[(2E)-3-(4-hydroxyphenyl)-2-propenoyl]oxy}-7-methyl-1,4a,5,6,7,7a-hexahydrocyclopenta[c]pyran-4-carboxylate |        |        | 249 |     |
| 3-(2,4-dihydroxyphenyl)-5,7-dihydroxy-6,8-bis(3-methylbut-2-en-1-yl)-3,4-dihydro-2H-1-benzopyran-4-one       | -      | 424.1  | 425 | 18. |
| Isorhapontigenin                                                                                             | 0.000  | 8795   | .19 | 595 |
|                                                                                                              | 64     |        | 519 |     |
|                                                                                                              | -      | 258.0  | 257 | 6.1 |
|                                                                                                              | 0.003  | 8549   | .07 | 75  |
|                                                                                                              | 72     |        | 809 |     |
| 5-Fluoro-3,5-ADB-PFUPPYCA                                                                                    | -      | 365.1  | 407 | 10. |
|                                                                                                              | 41.02  | 9485   | .22 | 57  |
|                                                                                                              | 318    |        | 861 |     |
| 2,4-Bis(3-methyl-2-buten-1-yl)-6a,11a-dihydro-6H-[1]benzofuro[3,2-c]chromene-3,9-diol                        | -      | 392.1  | 393 | 18. |
|                                                                                                              | 0.000  | 9821   | .20 | 845 |
|                                                                                                              | 55     |        | 547 |     |
| 7-(3,4-Dihydroxyphenyl)-1-(4-hydroxyphenyl)-3-heptanyl acetate                                               | 21.98  | 380.1  | 381 | 17. |
|                                                                                                              | 163    | 5965   | .16 | 879 |
|                                                                                                              |        |        | 693 |     |
| 3,5-Dihydroxy-2-(4-hydroxyphenyl)-3,4-dihydro-2H-chromen-7-yl pentofuranoside                                | -      | 388.11 | 389 | 11. |
|                                                                                                              | 18.011 | 494    | .12 | 5   |
|                                                                                                              | 44     |        | 225 |     |
| 3-[(2H-1,3-benzodioxol-5-yl)methyl]-4-[(3,4-dimethoxyphenyl)methyl]oxolan-2-one                              | -      | 352.1  | 353 | 15. |
|                                                                                                              | 18.011 | 3063   | .13 | 777 |
|                                                                                                              | 01     |        | 791 |     |
| 3-(1-hydroxyethyl)-2,3,6,7,8,8a-hexahydropyrrolo[1,2-a]pyrazine-1,4-dione                                    | -      | 198.1  | 231 | 1.5 |
|                                                                                                              | 0.000  | 0041   | .13 | 29  |
|                                                                                                              | 03     |        | 385 |     |
| Neosaxitoxin                                                                                                 | 21.98  | 337.11 | 338 | 10. |
|                                                                                                              | 699    | 61     | .12 | 153 |
|                                                                                                              |        |        | 329 |     |
| N'1-(2-Chlorobenzylidene)-4-hydroxy-3-(methylthio)-4,5,6,7-tetrahydrobenzo[c]thiophene-1-carbohydrazide      | -      | 380.0  | 379 | 7.3 |
|                                                                                                              | 0.000  | 4167   | .03 | 9   |
|                                                                                                              | 33     |        | 439 |     |
| Geniposidic acid                                                                                             | -      | 328.11 | 373 | 8.0 |
|                                                                                                              | 46.00  | 612    | .11 | 43  |
|                                                                                                              | 518    |        | 435 |     |
| Eriocitrin                                                                                                   | 0.000  | 596.1  | 641 | 10. |
|                                                                                                              | 57     | 7469   | .17 | 645 |
|                                                                                                              |        |        | 297 |     |
| 4-Pyridoxic acid                                                                                             | -      | 183.0  | 182 | 7.0 |
|                                                                                                              | 0.000  | 5241   | .04 | 97  |
|                                                                                                              | 75     |        | 514 |     |

|                                                                                                                                                                 |       |       |     |     |
|-----------------------------------------------------------------------------------------------------------------------------------------------------------------|-------|-------|-----|-----|
| 10-Nitrolinoleate                                                                                                                                               | -     | 307.2 | 308 | 18. |
|                                                                                                                                                                 | 18.01 | 1443  | .22 | 986 |
|                                                                                                                                                                 | 087   |       | 171 |     |
| N-(tert-Butyl)-N'-(2-hydroxyethyl)urea                                                                                                                          | 21.98 | 182.1 | 183 | 8.4 |
|                                                                                                                                                                 | 463   | 0581  | .11 | 06  |
|                                                                                                                                                                 |       |       | 308 |     |
| IRH                                                                                                                                                             | 21.98 | 446.2 | 447 | 8.1 |
|                                                                                                                                                                 | 332   | 3797  | .24 | 64  |
|                                                                                                                                                                 |       |       | 521 |     |
| 6-Hydroxy-1-(hydroxymethyl)-5-{2-[2-(hydroxymethyl)-1-pyrrolidinyl]-2-oxoethyl}-1,4a-dimethyldecahydro-2-naphthalenyl phenylcarbamate                           | 0.004 | 488.2 | 489 | 24. |
|                                                                                                                                                                 | 09    | 9273  | .29 | 939 |
|                                                                                                                                                                 |       |       | 993 |     |
| 2,4-Bis(3-methyl-2-buten-1-yl)-6a,11a-dihydro-6H-[1]benzofuro[3,2-c]chromene-3,9-diol                                                                           | -     | 392.1 | 393 | 20. |
|                                                                                                                                                                 | 0.000 | 9839  | .20 | 533 |
|                                                                                                                                                                 | 37    |       | 557 |     |
| Muscone                                                                                                                                                         | -     | 238.2 | 239 | 21. |
|                                                                                                                                                                 | 0.000 | 2938  | .23 | 93  |
|                                                                                                                                                                 | 28    |       | 662 |     |
| Terephthalic acid                                                                                                                                               | -     | 166.0 | 165 | 8.4 |
|                                                                                                                                                                 | 0.000 | 258   | .01 | 21  |
|                                                                                                                                                                 | 81    |       | 852 |     |
| 5-[2-(Benzylamino)-2-oxoethyl]-6-hydroxy-1-(hydroxymethyl)-1,4a-dimethyldecahydro-2-naphthalenyl isopropylcarbamate                                             | -     | 442.2 | 443 | 20. |
|                                                                                                                                                                 | 18.01 | 834   | .29 | 327 |
|                                                                                                                                                                 | 032   |       | 068 |     |
| 4-(2-thienyl)benzoic acid                                                                                                                                       | 0.001 | 204.0 | 203 | 3.1 |
|                                                                                                                                                                 | 93    | 2643  | .01 | 58  |
|                                                                                                                                                                 |       |       | 915 |     |
| Tetranor-12(S)-HETE                                                                                                                                             | 21.97 | 288.1 | 289 | 11. |
|                                                                                                                                                                 | 976   | 6796  | .17 | 938 |
|                                                                                                                                                                 |       |       | 523 |     |
| 2,3-Dihydro-1H-indol-7-yl(phenyl)methanone                                                                                                                      | -     | 223.0 | 224 | 6.6 |
|                                                                                                                                                                 | 0.003 | 9583  | .10 | 01  |
|                                                                                                                                                                 | 89    |       | 313 |     |
| (2S,3Z,4S)-2-(β-D-Glucopyranosyloxy)-3-(2-{(2E)-3-(4-hydroxyphenyl)-2-propenoyl}oxy)ethylidene)-4-(2-methoxy-2-oxoethyl)-3,4-dihydro-2H-pyran-5-carboxylic acid | 0.000 | 566.1 | 565 | 12. |
|                                                                                                                                                                 | 19    | 6375  | .15 | 641 |
|                                                                                                                                                                 |       |       | 649 |     |
| Enrofloxacin                                                                                                                                                    | -     | 359.1 | 360 | 9.0 |
|                                                                                                                                                                 | 0.006 | 5814  | .16 | 83  |
|                                                                                                                                                                 | 38    |       | 537 |     |
| 2-{1-[2-({6-[4-(tert-butyl)phenoxy]-3-                                                                                                                          | -     | 410.2 | 455 | 14. |

|                                                                                                                                                                                                     |       |        |     |     |
|-----------------------------------------------------------------------------------------------------------------------------------------------------------------------------------------------------|-------|--------|-----|-----|
| pyridinyl} amino)-2-oxoethyl]cyclopentyl} acetic acid                                                                                                                                               | 0.005 | 1553   | .21 | 019 |
| N- {[ (1S,4S,6S)-6-Isopropyl-3-methyl-4-oxadiazol-2-yl]methyl}-2-cyclohexen-1-yl]methyl}-6-methoxy-3-pyridinamine                                                                                   | 0.002 | 436.2  | 437 | 21. |
| L-Tyrosine methyl ester                                                                                                                                                                             | 42    | 6109   | .26 | 616 |
|                                                                                                                                                                                                     |       |        | 837 |     |
|                                                                                                                                                                                                     | -     | 149.0  | 194 | 9.9 |
|                                                                                                                                                                                                     | 46.00 | 8347   | .08 | 88  |
|                                                                                                                                                                                                     | 607   |        | 171 |     |
| [(2R,3S,4S,5R,6R)-6-{4-[(4,5-dihydroxy-6-{[(4-hydroxy-2-methylidenebutanoyl)oxy]methyl} oxan-3-yl)oxy]-3-methylidene-4-oxobutoxy}-3,4,5-trihydroxyoxan-2-yl]methyl 4-hydroxy-2-methylidenebutanoate | 46.00 | 666.2  | 665 | 10. |
|                                                                                                                                                                                                     | 642   | 3805   | .23 | 503 |
|                                                                                                                                                                                                     |       |        | 077 |     |
| 2,6-Anhydro-5-O-[4-({6-O-[4-(β-D-glucopyranosyloxy)-2-methylenebutanoyl]-β-D-glucopyranosyl}oxy)-2-methylenebutanoyl]-1-O-(4-hydroxy-2-methylenebutanoyl)hexitol                                    | 45.99 | 828.2  | 873 | 3.1 |
|                                                                                                                                                                                                     | 078   | 7524   | .27 | 1   |
|                                                                                                                                                                                                     |       |        | 368 |     |
| Oxibendazole                                                                                                                                                                                        | -     | 249.11 | 250 | 9.8 |
|                                                                                                                                                                                                     | 0.000 | 128    | .11 | 55  |
|                                                                                                                                                                                                     | 07    |        | 855 |     |
| 4-styrylpyridine                                                                                                                                                                                    | 181.0 | 362.1  | 182 | 5.9 |
|                                                                                                                                                                                                     | 8142  | 7057   | .09 | 78  |
|                                                                                                                                                                                                     |       |        | 267 |     |
| 1,4:3,6-Dianhydro-2,5-dideoxy-2-{[4-(3-fluorophenyl)-2-pyrimidinyl]amino}-5-[(methoxyacetyl)amino]-L-Iditol                                                                                         | -     | 388.1  | 387 | 14. |
|                                                                                                                                                                                                     | 0.002 | 5263   | .14 | 792 |
|                                                                                                                                                                                                     | 05    |        | 536 |     |
| 1-(4-Trifluoromethylphenyl)piperazine                                                                                                                                                               | -     | 213.0  | 231 | 9.6 |
|                                                                                                                                                                                                     | 17.02 | 7906   | .11 | 03  |
|                                                                                                                                                                                                     | 402   |        | 29  |     |
| PQH                                                                                                                                                                                                 | 21.98 | 402.1  | 403 | 7.8 |
|                                                                                                                                                                                                     | 451   | 6533   | .17 | 63  |
|                                                                                                                                                                                                     |       |        | 261 |     |
| Probenecid                                                                                                                                                                                          | -     | 285.1  | 286 | 5.8 |
|                                                                                                                                                                                                     | 0.002 | 0134   | .10 | 87  |
|                                                                                                                                                                                                     | 14    |        | 861 |     |
| 1-(4-Trifluoromethylphenyl)piperazine                                                                                                                                                               | -     | 213.0  | 231 | 9.0 |
|                                                                                                                                                                                                     | 17.02 | 7904   | .11 | 14  |
|                                                                                                                                                                                                     | 404   |        | 287 |     |
| 5-Fluoro-3,5-ADB-PFUPPYCA                                                                                                                                                                           | 0.003 | 406.2  | 405 | 10. |
|                                                                                                                                                                                                     | 82    | 2185   | .21 | 556 |

|                                                                                                                             |                   |               |            |            |
|-----------------------------------------------------------------------------------------------------------------------------|-------------------|---------------|------------|------------|
|                                                                                                                             |                   |               |            | 457        |
| N1-(3-Piperidinopropyl)-2-[(4-nitrobenzoyl)amino]benzamide                                                                  | 0.000<br>03       | 410.1<br>9543 | 879<br>.40 | 17.<br>249 |
| Guvacoline                                                                                                                  | 0.000<br>22       | 141.0<br>792  | 142<br>.08 | 7.2<br>1   |
| N-({(2R,4S,5R)-5-[2-Methyl-6-(2-thienyl)-4-pyrimidinyl]-1-azabicyclo[2.2.2]oct-2-yl}methyl)cyclobutanecarboxamide           | 0.001<br>4        | 396.1<br>9978 | 441<br>.19 | 12.<br>549 |
| Sibiricose A3                                                                                                               | -<br>60.02<br>109 | 402.11<br>625 | 461<br>.13 | 9.3<br>95  |
| N1-(3-Piperidinopropyl)-2-[(4-nitrobenzoyl)amino]benzamide                                                                  | 0.002<br>03       | 410.1<br>9743 | 409<br>.19 | 16.<br>102 |
| 2,2',4,4'-Tetrahydroxybenzophenone                                                                                          | -<br>0.000<br>21  | 246.0<br>5261 | 247<br>.05 | 14.<br>831 |
| N-{4-[(2R,3R)-3-(Hydroxymethyl)-4-methyl-5-oxo-2-morpholinyl]phenyl}cyclopentanecarboxamide                                 | 17.02<br>633      | 349.1<br>9994 | 350<br>.20 | 8.8<br>51  |
| 5,7-dihydroxy-2-[4-hydroxy-3-methoxy-5-(3-methylbut-2-en-1-yl)phenyl]-3,4-dihydro-2H-1-benzopyran-4-one                     | -<br>0.000<br>37  | 370.1<br>4127 | 371<br>.14 | 18.<br>249 |
| 4-Acetyl-3-hydroxy-5-methylphenyl β-D-glucopyranoside                                                                       | 0.000<br>45       | 328.11<br>626 | 387<br>.13 | 9.0<br>45  |
| Safrole                                                                                                                     | -<br>32.02<br>602 | 130.0<br>4206 | 163<br>.07 | 10.<br>269 |
| 7-hydroxy-2-(4-{{(2S,3R,4S,5S,6R)-3,4,5-trihydroxy-6-(hydroxymethyl)oxan-2-yl}oxy}phenyl)-3,4-dihydro-2H-1-benzopyran-4-one | 21.98<br>142      | 440.1<br>0781 | 441<br>.11 | 13.<br>853 |
| 2-Ethoxy-2'-ethyloxanilide                                                                                                  | 0.000<br>15       | 312.1<br>4754 | 313<br>.15 | 10.<br>275 |
| 2-furyl[4-(1H-indol-4-yl)piperazino]methanone                                                                               | -<br>0.003<br>82  | 295.1<br>2825 | 296<br>.13 | 8.5<br>63  |
| 2-{4-[(2-aminophenyl)thio]-3-                                                                                               | -                 | 394.0         | 393        | 12.        |



|                                                                                                                                                           |       |       |     |     |
|-----------------------------------------------------------------------------------------------------------------------------------------------------------|-------|-------|-----|-----|
| nitrobenzoyl}benzoic acid                                                                                                                                 | 0.004 | 5739  | .05 | 966 |
|                                                                                                                                                           | 96    |       | 011 |     |
| pentane-1,2,3,4,5-pentol                                                                                                                                  | 0.000 | 152.0 | 135 | 1.6 |
|                                                                                                                                                           | 01    | 6849  | .06 | 54  |
|                                                                                                                                                           |       |       | 523 |     |
| 2,4-dihydroxy-6-methyl-3-[(2E)-3-methyl-5-[(1S,2R,6R)-1,2,6-trimethyl-3-oxocyclohexyl]pent-2-en-1-yl]benzaldehyde                                         | -     | 354.2 | 355 | 10. |
|                                                                                                                                                           | 18.01 | 1572  | .22 | 218 |
|                                                                                                                                                           | 434   |       | 299 |     |
| 5-[3-(1H-Imidazol-1-yl)propyl]-1,3,5-triazinane-2-thione                                                                                                  | -     | 225.1 | 226 | 8.3 |
|                                                                                                                                                           | 0.004 | 0033  | .10 | 87  |
|                                                                                                                                                           | 48    |       | 757 |     |
| Propyl gallate                                                                                                                                            | -     | 212.0 | 211 | 7.8 |
|                                                                                                                                                           | 0.000 | 6805  | .06 | 46  |
|                                                                                                                                                           | 42    |       | 078 |     |
| 3-(2-morpholinophenyl)-2-(phenylsulfonyl)acrylonitrile                                                                                                    | 0.005 | 354.1 | 355 | 23. |
|                                                                                                                                                           | 87    | 0969  | .11 | 051 |
|                                                                                                                                                           |       |       | 707 |     |
| Syringic acid                                                                                                                                             | 0.003 | 198.0 | 197 | 8.4 |
|                                                                                                                                                           | 07    | 5589  | .04 | 97  |
|                                                                                                                                                           |       |       | 861 |     |
| N4-(2-{{(cyclopropylmethyl)amino}carbonyl}phenyl)-5-methyl-2-phenyl-2H-1,2,3-triazole-4-carboxamide                                                       | -     | 375.1 | 374 | 9.2 |
|                                                                                                                                                           | 0.005 | 6401  | .15 | 32  |
|                                                                                                                                                           | 51    |       | 674 |     |
| (3aR,7aS,8S,9aR)-5,8-dimethyl-3-methylidene-2H,3H,3aH,4H,6H,7H,7aH,8H,9H,9aH-azuleno[6,5-b]furan-2,6-dione                                                | -     | 245.1 | 229 | 5.4 |
|                                                                                                                                                           | 0.987 | 3778  | .11 | 7   |
|                                                                                                                                                           | 81    |       | 853 |     |
| N'-hydroxy-4,7-dimethylpyrazolo[5,1-c][1,2,4]triazine-3-carboximidamide                                                                                   | 0.002 | 206.0 | 205 | 15. |
|                                                                                                                                                           | 48    | 9409  | .08 | 546 |
|                                                                                                                                                           |       |       | 653 |     |
| 3-(4-Toluidino)-2,3-dihydro-1H-1λ6-thiophene-1,1-dione                                                                                                    | 0.003 | 223.0 | 224 | 5.9 |
|                                                                                                                                                           | 98    | 7068  | .07 | 5   |
|                                                                                                                                                           |       |       | 799 |     |
| Flurandrenolide                                                                                                                                           | -     | 436.2 | 437 | 20. |
|                                                                                                                                                           | 0.001 | 2478  | .23 | 883 |
|                                                                                                                                                           | 34    |       | 206 |     |
| (3beta,9xi,14xi,22S,25S)-26-Hydroxy-22,25-epoxyfurost-5-en-3-yl 6-deoxy-alpha-L-mannopyranosyl-(1-4)-[beta-D-glucopyranosyl-(1-2)]-beta-D-glucopyranoside | 900.4 | 1800. | 899 | 16. |
|                                                                                                                                                           | 7201  | 94387 | .46 | 377 |
|                                                                                                                                                           |       |       | 466 |     |
| Dibutylone                                                                                                                                                | 0.000 | 235.1 | 236 | 5.6 |

|                                                                                                                          |       |       |     |     |
|--------------------------------------------------------------------------------------------------------------------------|-------|-------|-----|-----|
|                                                                                                                          | 28    | 2113  | .12 | 73  |
|                                                                                                                          |       |       | 84  |     |
| N-{4-[(2R,3R)-3-(Hydroxymethyl)-4-isobutyl-5-oxo-2-morpholinyl]phenyl}cyclobutanecarboxamide                             | 17.02 | 377.2 | 378 | 10. |
|                                                                                                                          | 625   | 3116  | .23 | 989 |
|                                                                                                                          |       |       | 843 |     |
| 10b-methyl-1,5,6,10b-tetrahydroimidazo[2,1-a]isoquinolin-2(3H)-one                                                       | -     | 202.1 | 266 | 1.4 |
|                                                                                                                          | 0.003 | 0734  | .12 | 19  |
|                                                                                                                          | 27    |       | 32  |     |
| N-(1,3-benzodioxol-5-yl)-2-methyl-5-(piperidinofonyl)-3-furamide                                                         | -     | 370.1 | 393 | 12. |
|                                                                                                                          | 21.97 | 2589  | .11 | 66  |
|                                                                                                                          | 831   |       | 523 |     |
| trans-3,4-Difluorocinnamic acid                                                                                          | 0.002 | 184.0 | 183 | 6.8 |
|                                                                                                                          | 93    | 3651  | .02 | 72  |
|                                                                                                                          |       |       | 927 |     |
| 6 $\alpha$ -Methylprednisone                                                                                             | -     | 372.1 | 373 | 6.6 |
|                                                                                                                          | 0.003 | 8987  | .19 | 32  |
|                                                                                                                          | 8     |       | 714 |     |
| Apigetrin                                                                                                                | -     | 432.1 | 433 | 13. |
|                                                                                                                          | 0.000 | 0543  | .11 | 584 |
|                                                                                                                          | 22    |       | 258 |     |
| 1,7-bis(3,4-dihydroxyphenyl)heptan-3-one                                                                                 | 21.98 | 352.1 | 353 | 17. |
|                                                                                                                          | 393   | 3065  | .13 | 599 |
|                                                                                                                          |       |       | 791 |     |
| 6 $\beta$ -Naloxol                                                                                                       | -     | 329.1 | 328 | 10. |
|                                                                                                                          | 0.003 | 5907  | .15 | 443 |
|                                                                                                                          | 64    |       | 179 |     |
| (8,9-dimethoxy-10b-methyl-1-phenyl-1,5,6,10b-tetrahydro[1,2,4]triazolo[3,4-a]isoquinolin-3-yl)(phenyl)methanone          | -     | 427.1 | 428 | 9.2 |
|                                                                                                                          | 0.004 | 8544  | .19 | 65  |
|                                                                                                                          | 15    |       | 272 |     |
| 3-Hydroxybupivacaine                                                                                                     | 18.01 | 322.2 | 305 | 10. |
|                                                                                                                          | 046   | 2554  | .22 | 566 |
|                                                                                                                          |       |       | 223 |     |
| 15,16-dimethoxytricyclo[12.3.1.1 <sup>?</sup> ]nonadeca-1(18),2,4,6(19),14,16-hexaene-3,9,17-triol                       | -     | 358.1 | 376 | 17. |
|                                                                                                                          | 0.000 | 7763  | .21 | 734 |
|                                                                                                                          | 39    |       | 146 |     |
| 5-(5-{5-[(2S)-1-(1-Methyl-4-piperidinyl)-2-pyrrolidinyl]-1,2,4-oxadiazol-3-yl}-2-pyridinyl)pyrimidine                    | -     | 391.2 | 392 | 8.4 |
|                                                                                                                          | 0.001 | 1074  | .21 | 2   |
|                                                                                                                          | 32    |       | 796 |     |
| 4-Chloro-N-((1S,4S,6S)-6-isopropyl-3-methyl-4-[2-(4-morpholinyl)-2-oxoethyl]-2-cyclohexen-1-yl)methyl)benzenesulfonamide | -     | 468.1 | 467 | 11. |
|                                                                                                                          | 0.000 | 8451  | .17 | 167 |
|                                                                                                                          | 45    |       | 722 |     |

|                                                                                                                                                             |                   |               |            |            |
|-------------------------------------------------------------------------------------------------------------------------------------------------------------|-------------------|---------------|------------|------------|
| 4,6-dihydroxy-5a-methyl-3-methylidene-2-oxo-dodecahydronaphtho[1,2-b]furan-9-carbaldehyde                                                                   | 21.98<br>403      | 302.11<br>51  | 303<br>.12 | 18.<br>409 |
| (7E,13E)-9,15-dihydroxy-4,10,16-trimethyl-1,5,11-trioxacyclohexadeca-7,13-diene-2,6,12-trione                                                               | 37.95<br>778      | 380.0<br>8925 | 381<br>.09 | 17.<br>86  |
| 3,5-Dimethoxybenzoic acid                                                                                                                                   | 0.000<br>1        | 182.0<br>58   | 183<br>.06 | 10.<br>993 |
| N2-[2-(2-Pyridyl)ethyl]-4-hydroxyquinazoline-2-carboxamide                                                                                                  | 0.002<br>32       | 294.11<br>4   | 293<br>.10 | 17.<br>796 |
| L-Histidine                                                                                                                                                 | 0.000<br>14       | 155.0<br>6961 | 156<br>.07 | 2.3<br>82  |
| 19(R)-Hydroxy prostaglandin F1 $\alpha$                                                                                                                     | 0.000<br>05       | 372.2<br>5123 | 371<br>.24 | 14.<br>445 |
| 2-{7-oxo-2H,3H,7H-furo[3,2-g]chromen-2-yl}propan-2-yl (2Z)-2-methylbut-2-enoate                                                                             | 5.922<br>36       | 334.0<br>5343 | 335<br>.06 | 19.<br>721 |
| cyclopropylmethyl N-ethyl-[4-(tert-butyl)anilino]methanimidothioate hydrobromide                                                                            | 0.006<br>15       | 290.1<br>8782 | 291<br>.19 | 16.<br>709 |
| Luteolin                                                                                                                                                    | 0.000<br>31       | 286.0<br>4805 | 285<br>.04 | 13.<br>926 |
| 1-[4,5-bis(hydroxymethyl)-3-methoxy-2-methylphenoxy]-3-methylbutane-2,3-diol                                                                                | 5.931<br>81       | 306.0<br>891  | 339<br>.12 | 17.<br>857 |
| L-Tyrosine methyl ester                                                                                                                                     | -<br>46.00<br>604 | 149.0<br>8351 | 194<br>.08 | 10.<br>633 |
| (2R,3S,4S,5S)-4-hydroxy-2,5-bis(hydroxymethyl)-5-[[{(2R,3R,4S,5S,6R)-3,4,5-trihydroxy-6-(hydroxymethyl)oxan-2-yl]oxy}oxolan-3-yl (2E)-3-phenylprop-2-enoate | 17.02<br>688      | 489.1<br>8496 | 490<br>.19 | 6.4<br>27  |
| N6-(2-furylmethyl)-9H-purin-6-amine                                                                                                                         | -<br>0.001<br>69  | 215.0<br>7902 | 214<br>.07 | 7.4<br>05  |
| (5S,6S)-5-hydroxy-4-methoxy-6-(2-phenylethyl)-5,6-dihydro-2H-pyran-2-one                                                                                    | 21.98<br>399      | 270.0<br>8885 | 271<br>.09 | 16.<br>859 |
|                                                                                                                                                             |                   |               | 613        |            |

|                                                              |                  |               |                   |                  |
|--------------------------------------------------------------|------------------|---------------|-------------------|------------------|
| 3',4'-Tetramethylene- $\alpha$ -<br>pyrrolidinovalerophenone | -<br>0.000<br>26 | 285.2<br>09   | 286<br>.21<br>628 | 14.<br>703       |
| 1-O-(3,4,5-Trimethoxybenzoyl)-beta-L-<br>galactopyranose     | 46.00<br>591     | 420.1<br>2721 | 419<br>.11        | 6.0<br>62<br>993 |

---
